# Supplementary material for: Genome-wide metabolic model to improve understanding of CD4+ T cell metabolism, immunometabolism and application in drug design
Source: Royal Society of Chemistry journal article supplement (doi:10.1039/c5mb00480b), 2015-11-18
Supplement: c5mb00480b1.zip [file CD4T1670.xls]

## Sheet: reactions
Rxn name	Rxn description	Formula	Gene-reaction association	Genes	Proteins	Subsystem	Reversible	LB	UB	Objective	Confidence Score	EC Number	Notes	References
24_25DHVITD3t	24,25-Dihydroxyvitamin D3 transport from cytoplasm	2425dhvitd3[c] -> 2425dhvitd3[e]				Transport, extracellular	0	0	1000	0	2		NOTES:carrier-mediated transport - but which and how is unknown IT	PMID:11375437
25HVITD2t	25-hydroxyvitamin D2 transport from cytoplasm	25hvitd2[c] -> 25hvitd2[e]				Transport, extracellular	0	0	1000	0	2		NOTES:mechanism is unknown IT	PMID:11375437
25HVITD2tin	25-hydroxyvitamin D2 transport in cytoplasm	25hvitd2[e] -> 25hvitd2[c]				Transport, extracellular	0	0	1000	0	2		NOTES:carrier-mediated transport - but which and how is unknown IT	PMID:11375437
25HVITD2tin_m	25-hydroxyvitamin D2 transport in mitochondria	25hvitd2[c] -> 25hvitd2[m]				Transport, mitochondrial	0	0	1000	0	2		NOTES:mechanism is unknown IT	PMID:11375437
25HVITD2tm	25-hydroxyvitamin D2 transport from mitochondria	25hvitd2[m] -> 25hvitd2[c]				Transport, mitochondrial	0	0	1000	0	2		NOTES:carrier-mediated transport - but which and how is unknown IT	PMID:11375437
25HVITD3t	25-hydroxyvitamin D3 transport from cytoplasm	25hvitd3[c] -> 25hvitd3[e]				Transport, extracellular	0	0	1000	0	2		NOTES:mechanism is unknown IT	PMID:11375437
25HVITD3tin	25-hydroxyvitamin D3 transport in cytoplasm	25hvitd3[e] -> 25hvitd3[c]				Transport, extracellular	0	0	1000	0	2		NOTES:NCD, IT	PMID:11375437
25HVITD3tin_m	25-hydroxyvitamin D3 transport in mitochondria	25hvitd3[c] -> 25hvitd3[m]				Transport, mitochondrial	0	0	1000	0	2		NOTES:NCD	PMID:11375437
25HVITD3tm	25-hydroxyvitamin D3 transport from mitochondria	25hvitd3[m] -> 25hvitd3[c]				Transport, mitochondrial	0	0	1000	0	1		NOTES:unknown mechanism NJ
2DR1PP	2-deoxy-D-ribose 1-phosphate phosphorylase	h2o[c] + 2dr1p[c] -> pi[c] + drib[c]				Pyrimidine catabolism	0	0	1000	0	1	3.1.3.10	NOTES:unknown mechanism NJ
2MCITt	2-methylcitrate transport via diffusion	2mcit[c] <=> 2mcit[e]				Transport, extracellular	1	-1000	1000	0	1		NOTES:unknown mechanism NJ
3DSPHR	3-Dehydrosphinganine reductase	h[c] + nadph[c] + 3dsphgn[c] -> nadp[c] + sphgn[c]	-2531.1	2531.1		Sphingolipid metabolism	0	0	1000	0	1	1.1.1.102	NOTES:unknown mechanism NJ
3HBCDm	3-hydroxybutyryl-CoA dehydratase, mitochondrial	h2o[m] + b2coa[m] <=> 3hbcoa_R[m]	-55268.1	55268.1		Butanoate metabolism	1	-1000	1000	0	1	4.2.1.55	NOTES:SAB	PMID:15035803,PMID:8920635,PMID:9653080
3MOBt2im	3-methyl-2-oxobutanoate mitochondrial transport via proton symport	h[c] + 3mob[c] -> h[m] + 3mob[m]				Transport, mitochondrial	0	0	1000	0	2		NOTES:	PMID:6974773
4NPHSFte	xenobiotic transport	4nphsf[e] <=> 4nphsf[c]				Transport, extracellular	1	-1000	1000	0	2		NOTES:	PMID:15574355
4NPHSULT	4-Nitrophenol Sulfotransferase	paps[c] + 4nph[c] -> h[c] + pap[c] + 4nphsf[c]	(6799.1) or (6817.3) or (6799.2) or (6818.2) or (6817.2) or (6818.1) or (6817.1) or (6817.4) or (6818.3) or (6817.5)	6799.1 6799.2 6817.1 6817.2 6817.3 6817.4 6817.5 6818.1 6818.2 6818.3		Cytochrome metabolism	0	0	1000	0	4	2.8.2.1	NOTES:	PMID:6974773
4NPHte	xenobiotic transport	4nph[e] <=> 4nph[c]				Transport, extracellular	1	-1000	1000	0	4		NOTES:	PMID:15574355
5MTHFt	5-Methyltetrahydrofolate transport via receptor binding and protolysis	5mthf[e] <=> 5mthf[c]	(2348.5) or (2348.3) or (2348.1) or (2348.6) or (2352.1) or (2348.4) or (2348.2)	2348.1 2348.2 2348.3 2348.4 2348.5 2348.6 2352.1		Transport, extracellular	1	-1000	1000	0	2		NOTES:IT based on information in Bender, 2003, 2nd Ed., Nutritional Biochemistry of the Vitamins, p. 206
A_MANASEly	alpha-mannosidase, lysosomal	2 h2o[l] + m2mn[l] -> 2 man[l] + mn[l]	-4125.1	4125.1		N-glycan degradation	0	0	1000	0	2	3.2.1.24	NOTES:MM	PMID:10485319,PMID:10772957
AACOAT	Acetoacetyl-CoA:acetate CoA-transferase	atp[c] + coa[c] + acac[c] -> aacoa[c] + amp[c] + ppi[c]	-65985.1	65985.1		Propanoate metabolism	0	0	1000	0	2	6.2.1.16	NOTES:
ABTD	L-arabinitol 4-dehydrogenase	nad[c] + abt[c] <=> h[c] + nadh[c] + xylu_L[c]				Pentose phosphate pathway	1	-1000	1000	0	2	1.1.1.12	NOTES:
ABTti	L-arabinitol transport via passive diffusion	abt[c] -> abt[e]				Transport, extracellular	0	0	1000	0	2		NOTES:
ACACT10m	acetyl-CoA C-acetyltransferase, mitochondrial	coa[m] + 2maacoa[m] <=> accoa[m] + ppcoa[m]	-38.1	38.1		Valine, leucine, and isoleucine metabolism	1	-1000	1000	0	2	2.3.1.9	NOTES:
ACACT1r	acetyl-CoA C-acetyltransferase	2 accoa[c] <=> coa[c] + aacoa[c]	-39.1	39.1		Tryptophan metabolism	1	-1000	0.743713	0	4	2.3.1.9	NOTES:based on Vitamins, G.F.M. Ball,2004, Blackwell publishing, 1st ed (book) pg.196 IT	PMID:15358094,PMID:8266831
ACACT1rm	acetyl-CoA C-acetyltransferase, mitochondrial	2 accoa[m] -> coa[m] + aacoa[m]	(3030.1) and (3032.1) or (38.1)	3030.1 3032.1 38.1		Tryptophan metabolism	0	0	1000	0	4	2.3.1.9	NOTES:based on Vitamins, G.F.M. Ball,2004, Blackwell publishing, 1st ed (book) pg.196 IT; RE2240M	PMID:15358094,PMID:8266831
ACACT1x	acetyl-CoA C-acetyltransferase, mitochondrial	2 accoa[x] -> aacoa[x] + coa[x]	-39.1	39.1		Cholesterol metabolism	0	0	0.743713	0	2	2.3.1.9	NOTES:unknown mechanism, related cyp P450 metabolism reactions NJ. Steriods transported by free diffusion
ACACt2	acetoacetate transport via proton symport	h[e] + acac[e] <=> h[c] + acac[c]	(6566.1) or (9194.1)	6566.1 9194.1		Transport, extracellular	1	-1000	1000	0	2		NOTES:is found in blood --&gt; subsequently has to be transported but how? based on Vitamins, G.F.M. Ball,2004, Blackwell publishing, 1st ed (book) pg.193 IT
ACACT4p	acetyl-CoA C-acetyltransferase (octanoyl-CoA), peroxisomal	coa[x] + 3odcoa[x] -> accoa[x] + occoa[x]	-30.1	30.1		Fatty acid oxidation	0	0	1000	0	2	2.3.1.16	NOTES:is found in blood --&gt; subsequently has to be transported but how? based on Vitamins, G.F.M. Ball,2004, Blackwell publishing, 1st ed (book) pg.193 IT. Biochemicql	PMID:12045394
ACACT5p	acetyl-CoA C-acyltransferase (decanoyl-CoA), peroxisomal	coa[x] + 3oddcoa[x] -> accoa[x] + dcacoa[x]	-30.1	30.1		Fatty acid oxidation	0	0	1000	0	2	2.3.1.16	NOTES:
ACACtx	acetoacetate intracellular transport unknown mechanism	acac[c] <=> acac[x]				Transport, peroxisomal	1	-1000	1000	0	2		NOTES:is found in blood --&gt; subsequently has to be transported but how? based on Vitamins, G.F.M. Ball,2004, Blackwell publishing, 1st ed (book) pg.193 IT
ACALDt	acetaldehyde reversible transport	acald[e] <=> acald[c]				Transport, extracellular	1	-1000	1000	0	2		NOTES:is found in blood --&gt; subsequently has to be transported but how? based on Vitamins, G.F.M. Ball,2004, Blackwell publishing, 1st ed (book) pg.193 IT. Biochemical	PMID:12045394
ACALDtm	acetaldehyde mitochondrial diffusion	acald[m] <=> acald[c]				Transport, mitochondrial	1	-1000	1000	0	2		NOTES:is found in blood --&gt; subsequently has to be transported but how? based on Vitamins, G.F.M. Ball,2004, Blackwell publishing, 1st ed (book) pg.193 IT
ACALDtx	acetaldehyde peroxisomal diffusion	acald[x] <=> acald[c]				Transport, peroxisomal	1	-1000	1000	0	2		NOTES:
ACCOAC	acetyl-CoA carboxylase	atp[c] + 2 h[c] + hco3[c] + accoa[c] -> adp[c] + pi[c] + malcoa[c]				Exchange	0	0	1000	0	2		NOTES:is found in blood --&gt; subsequently has to be transported but how? based on Vitamins, G.F.M. Ball,2004, Blackwell publishing, 1st ed (book) pg.193 IT
ACCOACm	Acetyl-Coa carboxylase, beta isoform	accoa[m] + atp[m] + hco3[m] -> 2 h[m] + adp[m] + malcoa[m] + pi[m]	-32.1	32.1		Fatty acid oxidation	0	0	1000	0	4	6.4.1.2	NOTES:based on Vitamins, G.F.M. Ball,2004, Blackwell publishing, 1st ed (book) pg.196 IT	PMID:14671156,PMID:9333115
ACCOAtr	acetyl-coa transport	accoa[c] <=> accoa[r]	-9197.1	9197.1		Transport, endoplasmic reticular	1	-1000	1000	0	4		NOTES:based on Vitamins, G.F.M. Ball,2004, Blackwell publishing, 1st ed (book) pg.196 IT	PMID:14671156,PMID:9333115
ACGALK	N-acetylgalactosamine kinase	atp[c] + 2 h[c] + acgal[c] -> adp[c] + acgal1p[c]				Aminosugar metabolism	0	0	1000	0	4		NOTES:SAB see PMID 500639: this reaction is spontaneous	PMID:500639
ACGALK2	N-acetylgalactosamine kinase (ITP)	acgal[c] + itp[c] -> h[c] + acgal1p[c] + idp[c]				Aminosugar metabolism	0	0	1000	0	2		NOTES:-this is a lumped rxn w/ an inferred reduction rxn that occurs in conjunction w/ sulfotransferase step; this reduction step has to occur in order for the transformation (2amac--&gt;Lcyst) to be valid -used NADPH as electron donor since it is a common cofactor involved in biosynthetic steps utilizing oxygen (see Neema for further explanations) MM	PMID:3346220,PMID:6351723
ACGALtly	N-acetyl-galactosamine lysosomal efflux	acgal[l] -> acgal[c]				Transport, lysosomal	0	0	1000	0	4		NOTES:SAB PMID 11083877	PMID:11083877
ACGAM2E	N-acetylglucosamine 2-epimerase	acgam[c] <=> acmana[c]	-5973.1	5973.1		Aminosugar metabolism	1	-1000	1000	0	2	5.1.3.8	NOTES:NCD	PMID:9693094
ACGAM6PSi	N-acetylglucosamine-6-phosphate synthase	accoa[c] + gam6p[c] -> h[c] + coa[c] + acgam6p[c]	-64841.1	64841.1		Aminosugar metabolism	0	0	1000	0	4	2.3.1.4	NOTES:NCD	PMID:10108,PMID:21765
ACGAMK	N-acetylglucosamine kinase	atp[c] + 2 h[c] + acgam[c] -> adp[c] + acgam6p[c]	-55577.1	55577.1		Aminosugar metabolism	0	0	1000	0	4	2.7.1.59	NOTES:NCD	PMID:10510291,PMID:11101640,PMID:12739169,PMID:7835905,PMID:8476015,PMID:9425115,PMID:9508842,PMID:9649795,PMID:9786900,PMID:9824713
ACGAMtly	N-acetyl-glucosamine lysosomal efflux	acgam[l] -> acgam[c]				Transport, lysosomal	0	0	1000	0	4		NOTES:MM	PMID:14722772
ACITL	ATP-Citrate lyase	atp[c] + 3 h[c] + coa[c] + cit[c] -> adp[c] + pi[c] + accoa[c] + oaa[c]	(47.1) or (47.2)	47.1 47.2		Citric acid cycle	0	0	1000	0	2	2.3.3.8	NOTES:MM	PMID:426765
ACNAM9PL	N-Acetylneuraminate 9-phosphate pyruvate-lyase (pyruvate-phosphorylating)	h2o[c] + acmanap[c] + pep[c] -> pi[c] + acnamp[c]	-54187.1	54187.1		Aminosugar metabolism	0	0	1000	0	2	2.5.1.56	NOTES:SAB
ACNAM9PL2	N-Acetylneuraminate 9-phosphate pyruvate-lyase (pyruvate-phosphorylating)	h2o[c] + pep[c] + man6p[c] -> pi[c] + kdnp[c]	-54187.1	54187.1		Aminosugar metabolism	0	0	1000	0	4	2.5.1.56	NOTES:SAB PMID 11083877	PMID:11083877
ACNAMlt	N-acetylneuraminate transport into lysososme	h[c] + acnam[c] <=> h[l] + acnam[l]	-26503.1	26503.1		Transport, lysosomal	1	-1000	1000	0	4		NOTES:SAB	PMID:3466164
ACNAMPH	N-Acetylneuraminate 9-phosphate phosphohydrolase	h2o[c] + acnamp[c] -> pi[c] + acnam[c]				Aminosugar metabolism	0	0	1000	0	2	3.1.3.29	NOTES:SAB	PMID:7473774
ACNAMtn	N-acetylneuraminate nuclear import	acnam[c] -> acnam[n]				Transport, nuclear	0	0	1000	0	1		NOTES:SAB	PMID:1847521
ACNMLr	N-Acetylneuraminate lyase (reversible)	acnam[c] <=> pyr[c] + acmana[c]				Aminosugar metabolism	1	-1000	1000	0	4	4.1.3.3	NOTES:NCD	PMID:11827462
ACOAD10m	acyl-CoA dehydrogenase (2-methylbutanoyl-CoA), mitochondrial	2mbcoa[m] + fad[m] -> 2mb2coa[m] + fadh2[m]	(36.1) or (34.1)	34.1 36.1		Valine, leucine, and isoleucine metabolism	0	0	1000	0	4	1.3.99.12	NOTES:SAB	PMID:11306106,PMID:2071588
ACOAD1fm	acyl-CoA dehydrogenase (butanoyl-CoA), mitochondrial	fad[m] + btcoa[m] -> b2coa[m] + fadh2[m]	(80724.1) or (36.1) or (35.1) or (34.1) or (84129.1) or (27034.1) or (28976.1)	27034.1 28976.1 34.1 35.1 36.1 80724.1 84129.1		Butanoate metabolism	0	0	1000	0	4	1.3.99.2	NOTES:SAB	PMID:11306106,PMID:2071588
ACONT	aconitase	cit[c] <=> icit[c]	(3658.1) or (48.1)	3658.1 48.1		Citric acid cycle	1	-1000	1000	0	4	4.2.1.3	NOTES:SAB	PMID:10424772,PMID:12616643
ACONTm	Aconitate hydratase	cit[m] <=> icit[m]	-50.1	50.1		Citric acid cycle	1	-1000	1000	0	4	4.2.1.3	NOTES:SAB	PMID:10424772,PMID:12616643
ACP1_FMN_	acid phosphatase (FMN)	h2o[c] + fmn[c] -> pi[c] + ribflv[c]	(52.1) or (52.3) or (52.2)	52.1 52.2 52.3		Vitamin B2 metabolism	0	0	1000	0	2	3.1.3.2	NOTES:IT reaction involved in formation of 4-hydroxybenzoate from tyrosine.	PMID:11583838,PMID:12232327
ACRNtm	O-acetylcarnintine transport into mitochondria via diffusion	acrn[c] -> acrn[m]	-788.1	788.1		Transport, mitochondrial	0	0	1000	0	4		NOTES:
ACS	acetyl-CoA synthetase	atp[c] + coa[c] + ac[c] -> amp[c] + ppi[c] + accoa[c]	(65985.1) or (55902.2) or (55902.1)	55902.1 55902.2 65985.1		Glycolysis/gluconeogenesis	0	0	1000	0	2	6.2.1.1	NOTES:IT
ACS2	acetyl-CoA synthase (propionate)	atp[c] + coa[c] + ppa[c] -> amp[c] + ppi[c] + ppcoa[c]	(55902.1) or (65985.1) or (55902.2)	55902.1 55902.2 65985.1		Propanoate metabolism	0	0	1000	0	2	6.2.1.16	NOTES:HOW? IT
ACt2m	acetate mitochondrial transport via proton symport	h[c] + ac[c] <=> h[m] + ac[m]				Transport, mitochondrial	1	-1000	1000	0	2		NOTES:NCD
ACt2r	acetate reversible transport via proton symport	h[e] + ac[e] <=> h[c] + ac[c]				Transport, extracellular	1	-1000	1000	0	2		NOTES:
ACYP	acylphosphatase	h2o[c] + 13dpg[c] -> h[c] + pi[c] + 3pg[c]	(112611.1) or (98.1) or (97.2) or (97.1)	112611.1 97.1 97.2 98.1		Glycolysis/gluconeogenesis	0	0	1000	0	2	3.6.1.7	NOTES:Used to make Ubiquinone-10 enzyme has not been identified yet. IT	PMID:11051212
ADA	Adenosine deaminase	h2o[c] + h[c] + adn[c] -> nh4[c] + ins[c]	-100.1	100.1		Purine catabolism	0	0	1000	0	2	3.5.4.4	NOTES:Used to make Ubiquinone-10 enzyme has not been identified yet. IT	PMID:11051212
ADAe	Adenosine deaminase, extracellular	h[e] + h2o[e] + adn[e] -> ins[e] + nh4[e]	-100.1	100.1		Purine catabolism	0	0	1000	0	4	3.5.4.4	NOTES:
ADEt	adenine reversible transport, cytosol	ade[e] <=> ade[c]	-3177.1	3177.1		Transport, extracellular	1	-1000	1000	0	4		NOTES:NCD	PMID:7514594
ADK3	adentylate kinase (GTP)	3 h[c] + amp[c] + gtp[c] <=> adp[c] + gdp[c]	(26289.1) or (26289.2)	26289.1 26289.2		Nucleotide interconversion	1	-1000	1000	0	2		NOTES:NCD. rat gene that is homologous to the human gene encodes for this activity	PMID:9073515
ADKd	adenylate kinase (d form)	damp[c] + datp[c] <=> 2 dadp[c]	(26289.2) or (26289.1)	26289.1 26289.2		Nucleotide interconversion	1	-1000	1000	0	2	2.7.4.3	NOTES:MM	PMID:8824301
ADMDC	adenosylmethionine decarboxylase	h[c] + amet[c] -> co2[c] + ametam[c]	-262.1	262.1		Arginine and Proline Metabolism	0	0	1000	0	2		NOTES:SAB	PMID:13357462
ADNCYC	adenylate cyclase	atp[c] -> ppi[c] + camp[c]	(112.1) or (55811.1) or (109.1) or (112.2) or (114.1) or (108.1) or (113.1) or (107.1) or (196883.1) or (115.1) or (111.1)	107.1 108.1 109.1 111.1 112.1 112.2 113.1 114.1 115.1 196883.1 55811.1		Nucleotide interconversion	0	0	1000	0	4	2.7.4.3	NOTES:SAB
ADNt	adenosine facilated transport in cytosol	adn[e] <=> adn[c]	(3177.1) or (2030.1)	2030.1 3177.1		Transport, extracellular	1	-1000	1000	0	4	4.1.1.50	NOTES:SAB	PMID:8824301
ADPRDP	ADPribose diphosphatase	h2o[c] + adprib[c] -> 2 h[c] + amp[c] + r5p[c]	-11164.1	11164.1		Nucleotide interconversion	0	0	1000	0	2	4.6.1.1	NOTES:NCD	PMID:4507604
ADPRIBt	ADPribose transport	adprib[e] -> adprib[c]	-952.1	952.1		Transport, extracellular	0	0	1000	0	1		NOTES:SAB made up name
ADPT	adenine phosphoribosyltransferase	ade[c] + prpp[c] -> amp[c] + ppi[c]	-353.1	353.1		Nucleotide salvage pathway	0	0	1000	0	1	3.6.1.13	NOTES:SAB	PMID:15035803,PMID:8920635,PMID:9653080
ADPtx	ADP transporter, peroxisomal	adp[c] <=> 3 h[x] + adp[x]				Transport, peroxisomal	1	-1000	1000	0	1		NOTES:SAB	PMID:6422947,PMID:9732974
ADRNCOAtx	fatty acid intracellular transport	adrncoa[c] <=> adrncoa[x]				Transport, peroxisomal	1	-1000	1000	0	2	2.4.2.7	NOTES:SAB	PMID:11411609
ADRNt	fatty acid transport via diffusion	adrn[e] <=> adrn[c]				Transport, extracellular	1	-1000	1000	0	4		NOTES:MM	PMID:8428987
ADSK	adenylyl-sulfate kinase	atp[c] + 2 h[c] + aps[c] -> adp[c] + paps[c]	(9060.1) or (9061.1)	9060.1 9061.1		Nucleotide interconversion	0	0	1000	0	4		NOTES:MM	PMID:8428987
ADSL1	adenylosuccinate lyase	dcamp[c] -> amp[c] + fum[c]	(158.1) or (158.2)	158.1 158.2		Nucleotide interconversion	0	0	1000	0	2		NOTES:SAB
ADSS	adenylosuccinate synthase	asp_L[c] + gtp[c] + imp[c] -> 2 h[c] + pi[c] + gdp[c] + dcamp[c]	(159.1) or (122622.1) or (122622.2)	122622.1 122622.2 159.1		Nucleotide interconversion	0	0	1000	0	2	2.7.1.25	NOTES:SAB
AG13T1g	N-acetyllactosaminide beta-1,3-N-acetylglucosaminyltransferase, Golgi apparatus	uacgam[g] + ksii_core2_pre2[g] -> h[g] + udp[g] + ksii_core2_pre3[g]	(11041.1) or (10678.1) or (93010.1) or (374907.2) or (374907.1) or (146712.1) or (10331.1) or (10678.2) or (79369.1)	10331.1 10678.1 10678.2 11041.1 146712.1 374907.1 374907.2 79369.1 93010.1		Keratan sulfate synthesis	0	0	1000	0	4	4.3.2.2	NOTES:SAB	PMID:10867119
AG13T2g	N-acetyllactosaminide beta-1,3-N-acetylglucosaminyltransferase, Golgi apparatus	uacgam[g] + ksii_core2_pre4[g] -> h[g] + udp[g] + ksii_core2_pre5[g]	(79369.1) or (374907.1) or (11041.1) or (146712.1) or (374907.2) or (93010.1) or (10331.1) or (10678.1) or (10678.2)	10331.1 10678.1 10678.2 11041.1 146712.1 374907.1 374907.2 79369.1 93010.1		Keratan sulfate synthesis	0	0	1000	0	4	6.3.4.4	NOTES:MKA AMF IT
AG13T3g	N-acetyllactosaminide beta-1,3-N-acetylglucosaminyltransferase, Golgi apparatus	uacgam[g] + ksii_core2_pre7[g] -> h[g] + udp[g] + ksii_core2_pre8[g]	(10331.1) or (11041.1) or (374907.2) or (10678.1) or (79369.1) or (374907.1) or (10678.2) or (93010.1) or (146712.1)	10331.1 10678.1 10678.2 11041.1 146712.1 374907.1 374907.2 79369.1 93010.1		Keratan sulfate synthesis	0	0	1000	0	2	2.4.1.149	NOTES:PMID:486467 MM	PMID:14598172
AGDC	N-acetylglucosamine-6-phosphate deacetylase	h2o[c] + acgam6p[c] -> gam6p[c] + ac[c]	-51005.1	51005.1		Aminosugar metabolism	0	0	1000	0	4	2.4.1.149	NOTES:SAB
AHC	adenosylhomocysteinase	h2o[c] + ahcys[c] <=> adn[c] + hcys_L[c]	(191.1) or (10768.2) or (10768.1)	10768.1 10768.2 191.1		Methionine and cysteine metabolism	1	-1000	1000	0	2	2.4.1.149	NOTES:as described in Bender (Nutritional biochmeistry of the vitamins, 2nd edition) MM
AHCYStr	S-Adenosyl-L-homocysteine intracellular diffusion	ahcys[c] <=> ahcys[r]				Transport, endoplasmic reticular	1	-1000	1000	0	2	3.5.1.25	NOTES:MM. activity measured in rat, 3-sulfinoalanine is substrate found in human brain	PMID:3346220
AHEXASEly	beta-N-acetylhexosaminidase, lysosomal	2 h2o[l] + n2m2mn[l] -> m2mn[l] + 2 acgam[l]	(3073.1) or (3074.1) or (3073.1 and 3074.1)	3073.1 3074.1		N-glycan degradation	0	0	1000	0	2	3.3.1.1	NOTES:MM. activity measured in rat, 3-sulfinoalanine is substrate found in human brain	PMID:3346220
AICART	phosphoribosylaminoimidazolecarboxamide formyltransferase	10fthf[c] + aicar[c] <=> fprica[c] + thf[c]	-471.1	471.1		Purine synthesis	1	-1000	1000	0	2		NOTES:MM	PMID:3346220
AK2LGCHOLt	1-alkyl 2-acylglycerol 3-phosphocholine transport	ak2lgchol_hs[e] <=> ak2lgchol_hs[c]				Transport, extracellular	1	-1000	1000	0	2	3.2.1.52	NOTES:MM	PMID:3346220
ALAR	alanine racemase	ala_L[c] <=> ala_D[c]	-11212.1	11212.1		Alanine and aspartate metabolism	1	-1000	1000	0	4	2.1.2.3	NOTES:SAB	PMID:15035803,PMID:8920635,PMID:9653080
ALAt4	Alanine-Sodium symporter	na1[e] + ala_L[e] -> na1[c] + ala_L[c]	(54407.1) or (6542.1) or (11254.1) or (6541.1) or (81539.1) or (55089.1) or (84889.1)	11254.1 54407.1 55089.1 6541.1 6542.1 81539.1 84889.1		Transport, extracellular	0	0	1000	0	4	4.1.1.21	NOTES:SAB	PMID:15035803,PMID:8920635,PMID:9653080
ALAtN1	Alanine transport (Na, H coupled)	h[c] + 2 na1[e] + ala_L[e] <=> h[e] + 2 na1[c] + ala_L[c]	(92745.1) or (10991.1)	10991.1 92745.1		Transport, extracellular	1	-1000	1000	0	4	5.1.1.1	NOTES:SAB	PMID:15035803,PMID:8920635,PMID:9653080
ALCD1	alcohol dehydrogenase (methanol)	nad[c] + meoh[c] <=> h[c] + nadh[c] + fald[c]	(124.1) or (131.1) or (130.1) or (125.1 and 124.1) or (125.1 and 126.1) or (128.1) or (127.1) or (126.1 and 124.1) or (125.1) or (137872.1) or (284273.1) or (126.1) or (284273.2)	124.1 125.1 126.1 127.1 128.1 130.1 131.1 137872.1 284273.1 284273.2		Miscellaneous	1	-1000	1000	0	2		NOTES:NCD	PMID:10407778
ALCD21_D	alcohol dehydrogenase (D-1,2-propanediol)	nad[c] + 12ppd_R[c] -> h[c] + nadh[c] + lald_D[c]	(127.1) or (284273.2) or (125.1) or (128.1) or (131.1) or (125.1 and 124.1) or (124.1) or (130.1) or (137872.1) or (125.1 and 126.1) or (126.1 and 124.1) or (284273.1) or (126.1)	124.1 125.1 126.1 127.1 128.1 130.1 131.1 137872.1 284273.1 284273.2		Pyruvate metabolism	0	0	1000	0	2		NOTES:IT reaction involved in formation of 4-hydroxybenzoate from tyrosine.	PMID:11583838,PMID:12232327
ALCD21_L	alcohol dehydrogenase (L-1,2-propanediol)	nad[c] + 12ppd_S[c] -> h[c] + nadh[c] + lald_L[c]	(130.1) or (125.1) or (125.1 and 124.1) or (128.1) or (126.1) or (284273.2) or (137872.1) or (127.1) or (124.1) or (126.1 and 124.1) or (284273.1) or (125.1 and 126.1) or (131.1)	124.1 125.1 126.1 127.1 128.1 130.1 131.1 137872.1 284273.1 284273.2		Pyruvate metabolism	0	0	1000	0	2	1.1.1.1	NOTES:IT reaction involved in formation of 4-hydroxybenzoate from tyrosine.	PMID:11583838,PMID:12232327
ALCD22_D	alcohol dehydrogenase (D-lactaldehyde)	nad[c] + lald_D[c] -> h[c] + nadh[c] + mthgxl[c]	(126.1) or (137872.1) or (126.1 and 124.1) or (127.1) or (130.1) or (284273.1) or (125.1 and 124.1) or (128.1) or (124.1) or (125.1) or (284273.2) or (131.1) or (125.1 and 126.1)	124.1 125.1 126.1 127.1 128.1 130.1 131.1 137872.1 284273.1 284273.2		Pyruvate metabolism	0	0	1000	0	2	1.1.1.1	NOTES:unknown mechanism, related cyp P450 metabolism reactions NJ
ALCD22_L	alcohol dehydrogenase (L-lactaldehyde)	nad[c] + lald_L[c] -> h[c] + nadh[c] + mthgxl[c]	(126.1) or (137872.1) or (126.1 and 124.1) or (127.1) or (130.1) or (284273.1) or (125.1 and 124.1) or (128.1) or (124.1) or (125.1) or (284273.2) or (131.1) or (125.1 and 126.1)	124.1 125.1 126.1 127.1 128.1 130.1 131.1 137872.1 284273.1 284273.2		Pyruvate metabolism	0	0	1000	0	1	1.1.1.1	NOTES:NCD	PMID:15849464
ALCD2yf	alcohol dehydrogenase (ethanol, NADP), forward reaction	nadp[c] + etoh[c] -> h[c] + nadph[c] + acald[c]	(10327.1) or (10327.2)	10327.1 10327.2		Glycolysis/gluconeogenesis	0	0	1000	0	2	1.1.1.78	NOTES:SAB	PMID:3753983
ALDD2x	aldehyde dehydrogenase (acetaldehyde, NAD)	h2o[c] + nad[c] + acald[c] -> 2 h[c] + nadh[c] + ac[c]	(218.1) or (501.1) or (8854.2) or (224.1) or (222.1) or (8854.1) or (221.1) or (216.1) or (8854.3) or (223.1) or (220.1)	216.1 218.1 220.1 221.1 222.1 223.1 224.1 501.1 8854.1 8854.2 8854.3		Glycolysis/gluconeogenesis	0	0	1000	0	4	1.2.1.49	NOTES:MM	PMID:8428987
ALDD2xm	aldehyde dehydrogenase (acetylaldehyde, NAD), mitochondrial	h2o[m] + nad[m] + acald[m] -> 2 h[m] + nadh[m] + ac[m]	(219.1) or (217.1)	217.1 219.1		Glycolysis/gluconeogenesis	0	0	1000	0	2	1.1.1.1	NOTES:	PMID:8428987
ALDD2y	aldehyde dehydrogenase (acetaldehyde, NADP)	h2o[c] + nadp[c] + acald[c] -> 2 h[c] + nadph[c] + ac[c]	(223.1) or (221.1) or (218.1) or (8854.1) or (8854.3) or (222.1) or (8854.2) or (224.1)	218.1 221.1 222.1 223.1 224.1 8854.1 8854.2 8854.3		Glycolysis/gluconeogenesis	0	0	1000	0	2	1.1.1.2	NOTES:	PMID:8428987
ALOX5	Arachidonate 5-lipoxygenase	o2[c] + arachd[c] -> 5HPET[c]	-240.1	240.1		Eicosanoid metabolism	0	0	1000	0	2	1.2.1.3	NOTES:	PMID:8428987
ALOX52	Arachidonate 5-lipoxygenase	5HPET[c] -> h2o[c] + leuktrA4[c]	-240.1	240.1		Eicosanoid metabolism	0	0	1000	0	2	1.2.1.3	NOTES:unknown mechanism, related cyp P450 metabolism reactions NJ
ALR2	aldose reductase (methylglyoxal)	h[c] + nadph[c] + mthgxl[c] -> nadp[c] + acetol[c]	(10327.2) or (8574.1) or (10327.1) or (231.1)	10327.1 10327.2 231.1 8574.1		Pyruvate metabolism	0	0	1000	0	2	1.2.1.4	NOTES:unknown mechanism, related cyp P450 metabolism reactions NJ. Biochemical, Rat	PMID:9344226
ALR3	aldose reductase (acetol)	h[c] + nadph[c] + acetol[c] -> nadp[c] + 12ppd_S[c]	(10327.2) or (8574.1) or (10327.1) or (231.1)	10327.1 10327.2 231.1 8574.1		Pyruvate metabolism	0	0	1000	0	4	1.13.11.34	NOTES:RS/TV (6/14/05)	PMID:11535246,PMID:15293241
AMANK	N-acetyl-D-mannosamine kinase	atp[c] + 2 h[c] + acmana[c] -> adp[c] + acmanap[c]	(10020.1) or (55577.1)	10020.1 55577.1		Aminosugar metabolism	0	0	1000	0	2	1.13.11.34	NOTES:unknown mechanism, related cyp P450 metabolism reactions NJ. Physiological, Rat	PMID:8385949,PMID:9219629
AMETr	S-Adenosyl-L-methionine intracellular diffusion	amet[c] <=> amet[r]				Transport, endoplasmic reticular	1	-1000	1000	0	2	1.1.1.21	NOTES:IT Reaction correct??? (active transport)	PMID:6380540
AMPDA	Adenosine monophosphate deaminase	h2o[c] + h[c] + amp[c] -> nh4[c] + imp[c]	(271.2) or (270.1) or (271.1) or (272.1) or (271.3)	270.1 271.1 271.2 271.3 272.1		Nucleotide interconversion	0	0	1000	0	2	1.1.1.21	NOTES:presumed MDR transporter NJ. Physiological
AMPTASECGe	alanyl aminopeptidase (cys-gly) (e)	h2o[e] + cgly[e] -> cys_L[e] + gly[e]	-290.1	290.1		Glutathione metabolism	0	0	1000	0	2	2.7.1.60	NOTES:unknown mechanism, however glucuronidated metabolites need to get out of the cell NJ
AMPtp	AMP transporter, peroxisome	amp[c] <=> amp[x]				Transport, peroxisomal	1	-1000	1000	0	1		NOTES:unknown mechanism - presumed excretion of sulfonated testosterone NJ
ARAB_Lt	L-arabinoase extracellular transport	arab_L[e] <=> arab_L[c]				Transport, extracellular	1	-1000	1000	0	4	3.5.4.6	NOTES:NJ	PMID:1588921,PMID:16399349
ARABR	arabinose reductase	h[c] + nadph[c] + arab_L[c] -> nadp[c] + abt[c]	(10327.2) or (8574.1) or (10327.1) or (231.1)	10327.1 10327.2 231.1 8574.1		Pentose phosphate pathway	0	0	1000	0	1	3.4.11.2	NOTES:specific mechanism not known, proton dependence for trans-mit transport has been suggested, however directionality and stoichiometry has not yet been elucidated. see PMID: 12770731 and others NJ
ARACHDCOAtx	fatty acid intracellular transport	arachdcoa[c] <=> arachdcoa[x]				Transport, peroxisomal	1	-1000	1000	0	2		NOTES:specific mechanism not known, proton dependence for trans-mit transport has been suggested, however directionality and stoichiometry has not yet been elucidated. see PMID: 12770731 and others NJ
ARACHDt2	fatty acid transport via diffusion	arachd[e] <=> arachd[c]				Transport, extracellular	1	-1000	1000	0	2		NOTES:NCD. Delta-aminolevulinic acid is produced in mitochondria then converted to PBG in the cytoplasm. Could not find anything on the transporter itself.	PMID:10558864
ARACHDtr	intracellular transport	arachd[c] <=> arachd[r]				Transport, endoplasmic reticular	1	-1000	1000	0	2	1.1.1.21	NOTES:carrier-mediated transport - but which and how is unknown IT	PMID:11375437
ARACHt	fatty acid transport via diffusion	arach[e] <=> arach[c]				Transport, extracellular	1	-1000	1000	0	4		NOTES:IT	PMID:11375437,PMID:14770311
ARGtiDF	L-arginine transport via diffusion (extracellular to cytosol)	arg_L[e] -> arg_L[c]	(6541.1) or (6542.1) or (55089.1) or (84889.1)	55089.1 6541.1 6542.1 84889.1		Transport, extracellular	0	0	1000	0	4		NOTES:SAB	PMID:1540578
ARGtm	arginine mitochondrial transport via ornithine carrier	h[m] + arg_L[c] <=> h[c] + arg_L[m]	(83884.1) or (10166.1)	10166.1 83884.1		Transport, mitochondrial	1	-1000	1000	0	2		NOTES:unknown mechanism, related cyp P450 metabolism reactions NJ
ARTCOAL1	R group coenzyme a ligase	h2o[c] + Rtotalcoa[c] -> h[c] + coa[c] + Rtotal[c]				R group synthesis	0	0	1000	0	2		NOTES:SAB questionable--balanced, but h2o2 production is based on an obscure comment in entrez	PMID:11306106
ARTCOAL2	R group coenzyme a ligase	h2o[c] + Rtotal2coa[c] -> h[c] + coa[c] + Rtotal2[c]				R group synthesis	0	0	1000	0	2		NOTES:SAB	PMID:11306106
ARTCOAL3	R group coenzyme a ligase	h2o[c] + Rtotal3coa[c] -> h[c] + coa[c] + Rtotal3[c]				R group synthesis	0	0	1000	0	4		NOTES:SAB	PMID:11134050,PMID:15035803,PMID:8920635,PMID:9653080
R_group_phosphotase_1	R group phosphotase 1	atp[c] + coa[c] + Rtotal[c] -> amp[c] + ppi[c] + Rtotalcoa[c]				Unassigned	0	0	1000	0	1		NOTES:SAB. The E.C. number 1.13.11.42 has been deleted in 2006. Instead, replaced with E.C. 1.13.11.11 - tryptophan 2,3-dioxygenase. However, E.C. 1.13.11.11 is for the reaction L-tryptophan + O2 = N-formyl-L-kynurenine. For the reaction 5-Hydroxy-L-tryptophan (Cytosol) + O2 (Cytosol) &lt;=&gt; 5-Hydroxy-N-formylkynurenine, E.C. should be 1.13.11.52. Conclusion: Change E.C. to 1.13.11.52 (source:…	PMID:10564724
R_group_phosphotase_2	R group phosphotase 2	atp[c] + coa[c] + Rtotal2[c] -> amp[c] + ppi[c] + Rtotal2coa[c]				Unassigned	0	0	1000	0	4		NOTES:SAB This reaction represents the ATP driven secretion of 5htrp from the cell. It leaves out the vesicle because that is not a compartment. ATP:H ratio is assumed as 1:3 for vacuolar ATPase and substrate:h ratio is 1:2. This gives a 3:2 ratio for substrate:ATP	PMID:12827358,PMID:15383652
R_group_phosphotase_3	R group phosphotase 3	atp[c] + coa[c] + Rtotal3[c] -> amp[c] + ppi[c] + Rtotal3coa[c]				Unassigned	0	0	1000	0	1		NOTES:SAB
ASCBOX	ascorbic acid oxidase	3 h[c] + ascb_L[c] + 2 o2s[c] -> 2 h2o2[c] + dhdascb[c]				Vitamin C metabolism	0	0	1000	0	1		NOTES:SAB	PMID:15035803,PMID:8920635,PMID:9653080
ASCBt	L-ascorbate transport via facilitated diffusion	ascb_L[e] <=> ascb_L[c]				Transport, extracellular	1	-1000	1000	0	4		NOTES:IT	PMID:15094208
ASCBt4	L-ascorbate transport via proton symport	na1[e] + ascb_L[e] <=> na1[c] + ascb_L[c]	(9962.2) or (9963.1) or (9962.1) or (9963.2)	9962.1 9962.2 9963.1 9963.2		Transport, extracellular	1	-1000	1000	0	4		NOTES:IT	PMID:11375437,PMID:14770311
ASNt4	L-asparagine transport in via sodium symport	na1[e] + asn_L[e] -> na1[c] + asn_L[c]	(81539.1) or (11254.1) or (54407.1) or (55089.1)	11254.1 54407.1 55089.1 81539.1		Transport, extracellular	0	0	1000	0	2		NOTES:carrier-mediated transport - but which and how is unknown IT	PMID:11375437
ASNtN1	Asparagine transport (Na, H coupled)	h[c] + 2 na1[e] + asn_L[e] <=> h[e] + 2 na1[c] + asn_L[c]	(92745.1) or (10991.1)	10991.1 92745.1		Transport, extracellular	1	-1000	1000	0	2		NOTES:unknown mechanism. IT	PMID:11375437
Asn_X_Ser_Thrtr	Asn-X-Ser/Thr transport (from ER to lysosome)	Asn_X_Ser_Thr[r] <=> Asn_X_Ser_Thr[l]				Transport, endoplasmic reticular	1	-1000	1000	0	2		NOTES:carrier-mediated transport - but which and how is unknown IT	PMID:11375437
ASPCTr	aspartate carbamoyltransferase (reversible)	asp_L[c] + cbp[c] <=> h[c] + pi[c] + cbasp[c]	-790.1	790.1		Pyrimidine synthesis	1	-1000	1000	0	2		NOTES:unknown mechanism. IT	PMID:11375437
ASPGLUm	aspartate-glutamate mitochondrial shuttle	h[c] + glu_L[c] + asp_L[m] -> h[m] + glu_L[m] + asp_L[c]	(8604.1) or (10165.1)	10165.1 8604.1		Transport, mitochondrial	0	0	1000	0	2		NOTES:unknown mechanism, inactivated testosterone needs to be exported NJ
ASPTA	aspartate transaminase	akg[c] + asp_L[c] <=> glu_L[c] + oaa[c]	-2805.1	2805.1		Alanine and aspartate metabolism	1	-1000	5.8697	0	2		NOTES:unknown mechanism, inactivated testosterone transport to get out of cell NJ
ASPTAm	aspartate transaminase	akg[m] + asp_L[m] <=> glu_L[m] + oaa[m]	-2806.1	2806.1		Alanine and aspartate metabolism	1	-1000	5.8697	0	2	2.1.3.2	NOTES:carrier-mediated transport - but which and how is unknown IT	PMID:11375437
ATP1ter	ADP/ATP transporter, endoplasmic reticulum	atp[c] + 4 h[c] + adp[r] <=> adp[c] + atp[r]				Transport, endoplasmic reticular	1	-1000	1000	0	2		NOTES:unknown mechanism. IT	PMID:11375437
ATP2ter	AMP/ATP transporter, endoplasmic reticulum	atp[c] + h[c] + amp[r] <=> amp[c] + atp[r]				Transport, endoplasmic reticular	1	-1000	1000	0	2	2.6.1.1	NOTES:specific mechanism not known, proton dependence for trans-mit transport has been suggested, however directionality and stoichiometry has not yet been elucidated. see PMID: 12770731 and others NJ
ATPasel	V-type ATPase, H+ transporting, lysosomal	h2o[c] + atp[c] + 3 h[c] -> adp[c] + pi[c] + h[l]	(50617.1 and 533.1 and 527.1 and 8992.1 and 245972.1 or 50617.1 and 533.1 and 527.1 and 8992.1 and 9114.1 or 533.1 and 527.1 and 8992.1 and 535.1 and 245972.1 or 533.1 and 527.1 and 8992.1 and 535.1 and 9114.1 or 533.1 and 527.1 and 8992.1 and 50617.3 and 245972.1 or 533.1 and 527.1 and 8992.1 and 10312.1 and 9114.1 or 533.1 and 527.1 and 8992.1 and 245972.1 and 50617.2 or 533.1 and 527.1 and 899…	10312.1 10312.2 127124.1 127124.2 23545.1 245972.1 245973.1 50617.1 50617.2 50617.3 51382.1 51606.1 51606.2 51606.3 523.1 525.1 526.1 527.1 528.1 528.2 529.1 533.1 534.1 534.2 535.1 8992.1 90423.1 9114.1 9296.1 9550.1		Transport, lysosomal	0	0	1000	0	2	2.6.1.1	NOTES:carrier-mediated transport - but which and how is unknown IT	PMID:11375437
ATPH1e	ATP diphosphohydrolase	2 h2o[e] + atp[e] -> 3 h[e] + amp[e] + 2 pi[e]	(954.1) or (954.2) or (953.1) or (956.1) or (955.1) or (957.1)	953.1 954.1 954.2 955.1 956.1 957.1		Nucleotide interconversion	0	0	1000	0	2		NOTES:unknown mechanism. IT	PMID:11375437
ATPH2e	ATP diphosphohydrolase	h2o[e] + adp[e] -> h[e] + amp[e] + pi[e]	(954.2) or (954.1) or (953.1) or (956.1) or (955.1) or (957.1)	953.1 954.1 954.2 955.1 956.1 957.1		Nucleotide interconversion	0	0	1000	0	2		NOTES:carrier-mediated transport - but which and how is unknown IT	PMID:11375437
ATPS4m	ATP synthase (four protons for one ATP)	5 h[c] + adp[m] + pi[m] -> 3 h[m] + h2o[m] + atp[m]	(513.1 and 498.2 and 506.1 and 509.2 and 514.1 or 498.2 and 513.2 and 514.2 and 506.1 and 509.2 or 513.1 and 509.1 and 498.1 and 514.2 and 506.1 or 498.2 and 513.2 and 506.1 and 509.2 and 514.1 or 513.2 and 498.1 and 514.2 and 506.1 and 509.2 or 513.1 and 498.1 and 506.1 and 509.2 and 514.1 or 513.1 and 498.2 and 514.2 and 506.1 and 509.2 or 513.1 and 498.2 and 509.1 and 506.1 and 514.1 or 498.2 …	10476.1 10476.2 10632.1 4905.1 498.1 498.2 498.3 506.1 509.1 509.2 513.1 513.2 514.1 514.2 515.1 515.2 515.3 516.1 516.2 517.1 517.2 518.1 518.2 518.3 521.1 522.1 522.2 522.3 522.4 522.5 9551.1 9551.2 9551.3		Oxidative phosphorylation	0	0	1000	0	2	3.6.3.14	NOTES:unknown mechanism. IT	PMID:11375437
ATPtm	ADP/ATP transporter, mitochondrial	adp[c] + atp[m] -> atp[c] + 4 h[c] + adp[m]	(291.1) or (293.1) or (292.1)	291.1 292.1 293.1		Transport, mitochondrial	0	0	1	0	0	3.6.1.5	NOTES:NCD
ATPtn	ATP diffusion in nucleus	atp[c] <=> atp[n]				Transport, nuclear	1	-1000	1000	0	0	3.6.1.5	NOTES:NCD	PMID:8910458
ATPtx	ATP transporter, peroxisomal	atp[c] + h[c] <=> atp[x]				Transport, peroxisomal	1	-1000	1000	0	4	3.6.3.14	NOTES:EC: 2.4.1.228 NJ	PMID:10748143
AVITE1t	alpha-Tocopherol (Vit. E) transport	avite1[e] -> avite1[c]				Transport, extracellular	0	0	1000	0	4		NOTES:EC: 2.4.1.228 NJ	PMID:10747952,PMID:10748143
AVITE2t	alpha-tocotrienol (Vit. E) transport	avite2[e] -> avite2[c]				Transport, extracellular	0	0	1000	0	0		NOTES:EC 2.4.1.- NCD	PMID:10430883
B_MANNASEly	beta-mannosidase, lysosomal	h2o[l] + mn[l] -> man[l] + acgam[l]	-4126.1	4126.1		N-glycan degradation	0	0	1000	0	0		NOTES:EC 2.4.1.- NCD	PMID:10430883
BDHm	(R)-3-Hydroxybutanoate:NAD+ oxidoreductase	nad[m] + bhb[m] <=> h[m] + nadh[m] + acac[m]	(622.2) or (622.3) or (622.1)	622.1 622.2 622.3		Butanoate metabolism	1	-1000	0.00872784	0	4		NOTES:also EC 2.8.3.8 NCD	PMID:12623130
BDMT_L	GDPmannose:chitobiosyldiphosphodolichol beta-D-mannosyltransferase (liver)	0.1 chito2pdol_L[c] + gdpmann[c] -> h[c] + gdp[c] + 0.1 mpdol_L[c]	-56052.1	56052.1		N-glycan synthesis	0	0	1000	0	4		NOTES:	PMID:10328770,PMID:12878330
BHBt	(R)-3-Hydroxybutanoate transport via H+ symport	h[e] + bhb[e] <=> h[c] + bhb[c]				Transport, extracellular	1	-1000	1000	0	1	3.2.1.25	NOTES:MM
BHBtm	(R)-3-Hydroxybutanoate mitochondrial transport via H+ symport	h[c] + bhb[c] <=> h[m] + bhb[m]				Transport, mitochondrial	1	-1000	1000	0	2	1.1.1.30	NOTES:MM. Found under reaction synonym name: 2-aminoadipic 6-semialdehyde dehydrogenase; Evidence was from mouse with identification of good human ortholog for U26 in the mouse that catalyzes this reaction. There was NOT evidence here specific to mitochondria, though. (Nathan Price)	PMID:15865210
BILDGLCURtr	glucuronidated compound transport	bildglcur[c] <=> bildglcur[r]				Transport, endoplasmic reticular	1	-1000	1000	0	4	2.4.1.142	NOTES:MM	PMID:12126930
BILIRUBtr	lipid, flip-flop intracellular transport	bilirub[c] <=> bilirub[r]				Transport, endoplasmic reticular	1	-1000	1000	0	4		NOTES:NJ	PMID:11421346,PMID:12198488,PMID:2121736
BPNT	3',5'-bisphosphate nucleotidase	h2o[c] + pap[c] -> pi[c] + amp[c]	-10380.1	10380.1		Nucleotide interconversion	0	0	1000	0	4		NOTES:NJ	PMID:11421346,PMID:12198488,PMID:2121736
BPNT2	3',5'-bisphosphate nucleotidase (paps)	h2o[c] + paps[c] -> pi[c] + aps[c]	-10380.1	10380.1		Nucleotide interconversion	0	0	1000	0	4		NOTES:NJ	PMID:11421346,PMID:12198488,PMID:2121736
BTNDe	biotinidase (biotin), extracellular	h2o[e] + biocyt[e] -> lys_L[e] + btn[e]	-686.1	686.1		Biotin metabolism	0	0	1000	0	4		NOTES:NJ	PMID:11421346,PMID:12198488,PMID:2121736
BTNt3i	Biotin transport via sodium symport	h2o[c] + atp[c] + na1[e] + btn[e] -> adp[c] + h[c] + pi[c] + na1[c] + btn[c]	-8884.1	8884.1		Transport, extracellular	0	0	1000	0	4	3.1.3.7	NOTES:NJ	PMID:11421346,PMID:12198488,PMID:2121736
BVITEt	beta-Tocopherol (Vit. E) transport	bvite[e] -> bvite[c]				Transport, extracellular	0	0	1000	0	4	3.1.3.7	NOTES:NJ	PMID:11421346,PMID:12198488,PMID:2121736
C14STRr	C-14 sterol reductase	h[r] + 44mctr[r] + nadph[r] -> 44mzym[r] + nadp[r]	-7108.1	7108.1		Cholesterol metabolism	0	0	1000	0	4	3.5.1.12	NOTES:NJ	PMID:11421346,PMID:12198488,PMID:2121736
C160CPT2	C160 transport into the mitochondria	coa[m] + pmtcrn[m] -> crn[m] + pmtcoa[m]	-1376.1	1376.1		Fatty acid oxidation	0	0	1000	0	4		NOTES:NJ	PMID:11421346,PMID:12198488,PMID:2121736
C160CRNt	C160 transport into the mitochondria	pmtcrn[c] -> pmtcrn[m]	-788.1	788.1		Fatty acid oxidation	0	0	1000	0	4		NOTES:NJ	PMID:11421346,PMID:12198488,PMID:2121736
C204CPT2	arachidonic acid transport into the mitochondria	coa[m] + arachdcrn[m] -> crn[m] + arachdcoa[m]	-1376.1	1376.1		Fatty acid oxidation	0	0	1000	0	4	1.3.1.70	NOTES:kh 1/6/03	PMID:10407778,PMID:7721088
C204CRNt	arachidonic acid transport into the mitochondria	arachdcrn[c] -> arachdcrn[m]				Fatty acid oxidation	0	0	1000	0	2	2.3.1.21	NOTES:NCD	PMID:12359133,PMID:13922173,PMID:15234337
C226COAtx	fatty acid intracellular transport	c226coa[c] <=> c226coa[x]				Transport, peroxisomal	1	-1000	1000	0	2		NOTES:NCD	PMID:15234337
CAMPt	cAMP transport (ATP-dependent)	h2o[c] + atp[c] + camp[c] -> adp[c] + h[c] + pi[c] + camp[e]	(10257.1) or (10057.2) or (10057.1)	10057.1 10057.2 10257.1		Transport, extracellular	0	0	1000	0	4		NOTES:JLR	PMID:8786138
CAT2p	catalase A, peroxisomal (ethanol)	h2o2[x] + etoh[x] -> acald[x] + 2 h2o[x]	-847.1	847.1		Glycolysis/gluconeogenesis	0	0	1000	0	2		NOTES:SAB r	PMID:11390972,PMID:11959859
CATm	catalase	2 h2o2[m] -> o2[m] + 2 h2o[m]	-847.1	847.1		ROS detoxification	0	0	1000	0	4		NOTES:SAB r, lyso	PMID:11390972,PMID:11959859
CATp	catalase A, peroxisomal	2 h2o2[x] -> o2[x] + 2 h2o[x]	-847.1	847.1		Miscellaneous	0	0	1000	0	4		NOTES:SAB	PMID:12719981
CBPS	carbamoyl-phosphate synthase (glutamine-hydrolysing)	h2o[c] + 2 atp[c] + 4 h[c] + hco3[c] + gln_L[c] -> 2 adp[c] + pi[c] + glu_L[c] + cbp[c]	-790.1	790.1		Pyrimidine synthesis	0	0	1000	0	4	1.11.1.6	NOTES:MM. 2-Methyl-3-acetoacetyl-CoA excreted into urine for patients with disease deficiency	PMID:676035
CBR2	Carbonyl reductase [NADPH] 1	h[c] + nadph[c] + prostge2[c] -> nadp[c] + prostgf2[c]	-873.1	873.1		Eicosanoid metabolism	0	0	1000	0	0	1.11.1.6	NOTES:JLR- reversible form of ACACT1
CDIPTr	phosphatidylinositol synthase (Homo sapiens)	cdpdag_hs[c] + inost[c] <=> h[c] + cmp[c] + pail_hs[c]	(10423.1) or (10423.2)	10423.1 10423.2		Glycerophospholipid metabolism	1	-1000	1000	0	0	1.11.1.6	NOTES:TDV
CEPTC	choline phosphotransferase	cdpchol[c] + dag_hs[c] -> h[c] + cmp[c] + pchol_hs[c]	(10390.1) or (56994.1)	10390.1 56994.1		Glycerophospholipid metabolism	0	0	1000	0	4		NOTES:NCD NJ - added peroxisomal version	PMID:11108725
CERK	Ceramide kinase	atp[c] + 2 h[c] + crm_hs[c] -> adp[c] + crmp_hs[c]	(64781.1) or (64781.2)	64781.1 64781.2		Sphingolipid metabolism	0	0	1000	0	4	1.1.1.197	NOTES:originally named AACTP NCD	PMID:10510291,PMID:11101640,PMID:12739169,PMID:7835905,PMID:8476015,PMID:9425115,PMID:9508842,PMID:9649795,PMID:9786900,PMID:9824713
CHLPCTD	choline phosphate cytididyltransferase	h[c] + ctp[c] + cholp[c] -> ppi[c] + cdpchol[c]	(5130.1) or (9468.1)	5130.1 9468.1		Glycerophospholipid metabolism	0	0	1000	0	4	2.7.8.11	NOTES:IT, TDV changed name from &quot;tm2&quot; to &quot;t2m&quot; - NCD	PMID:28726,PMID:627555
CHOLK	Choline kinase	atp[c] + 2 h[c] + chol[c] -> adp[c] + cholp[c]	(1120.2) or (1119.1) or (1120.1) or (1119.2)	1119.1 1119.2 1120.1 1120.2		Glycerophospholipid metabolism	0	0	1000	0	4		NOTES:NCD	PMID:1679347
CHSTEROLt1	cholesterol intracellular transport	chsterol[l] <=> chsterol[m]	-10948.1	10948.1		Transport, mitochondrial	1	-1000	1000	0	4	2.7.1.138	NOTES:NCD	PMID:1679347
CHSTEROLt2	cholesterol intracellular transport	chsterol[r] <=> chsterol[m]				Transport, mitochondrial	1	-1000	1000	0	4	2.7.7.15	NOTES:NCD	PMID:1679347
CHSTEROLt3	cholesterol intracellular transport	chsterol[c] <=> chsterol[m]				Transport, mitochondrial	1	-1000	1000	0	4		NOTES:NCD	PMID:1679347
CITRtm	citrulline mitochondrial transport via proton antiport	citr_L[m] <=> citr_L[c]	(83884.1) or (10166.1)	10166.1 83884.1		Transport, mitochondrial	1	-1000	1000	0	4		NOTES:NCD	PMID:1679347
CLPNDCOAtx	fatty acid intracellular transport	clpndcoa[c] <=> clpndcoa[x]				Transport, peroxisomal	1	-1000	1000	0	4		NOTES:NCD	PMID:1679347
CLPNDt	fatty acid transport via diffusion	clpnd[e] <=> clpnd[c]				Transport, extracellular	1	-1000	1000	0	1		NOTES:unknown mechanism NJ
CLS_hs	cardiolipin synthase (homo sapiens)	cdpdag_hs[c] + pglyc_hs[c] -> h[c] + cmp[c] + clpn_hs[c]	-54675.1	54675.1		Glycerophospholipid metabolism	0	0	1000	0	2		NOTES:NCD
CMPACNAtg	CMP-Sia Golgi transport via CMP antiport	cmp[g] + cmpacna[c] <=> cmp[c] + cmpacna[g]	-10559.1	10559.1		Transport, golgi apparatus	1	-1000	1000	0	2		NOTES:NCD	PMID:9028626
CMPACNAtn	CMP-Sia nuclear export	cmpacna[n] -> cmpacna[c]				Transport, nuclear	0	0	1000	0	1		NOTES:	PMID:9028626
CMPSAS	CMP sialic acid synthase	acnam[c] + ctp[c] -> ppi[c] + cmpacna[c]	-55907.1	55907.1		Aminosugar metabolism	0	0	1000	0	1		NOTES:NCD
CMPSASn	CMP sialic acid synthase, nuclear	acnam[n] + ctp[n] -> cmpacna[n] + ppi[n]	-55907.1	55907.1		Aminosugar metabolism	0	0	1000	0
CO2t	CO2 transporter via diffusion	co2[e] <=> co2[c]				Transport, extracellular	1	-1000	1000	0	4		NOTES:TDV (9/14/2004)	PMID:10677481
CO2ter	CO2 endoplasmic reticular transport via diffusion	co2[c] <=> co2[r]				Transport, endoplasmic reticular	1	-1000	1000	0	4	2.7.7.43	NOTES:transport between cytosol and Golgi/ER presumed presumed facilitated transport, but unknown co-substrates, see PMID: 12739170, Hirabayashi et al NJ	PMID:12739170
CO2tm	CO2 transport (diffusion), mitochondrial	co2[c] <=> co2[m]				Transport, mitochondrial	1	-1000	1000	0	4	2.7.7.43	NOTES:JLR- also acts on propanoate	PMID:10843999
CO2tp	CO2 peroxisomal transport	co2[c] <=> co2[x]				Transport, peroxisomal	1	-1000	1000	0	2		NOTES:TDV-mitochondrial version JLR- also acts on propanoate AMF- made reaction to create AMP not ADP and changed EC	PMID:11150295
COAtm	CoA transporter	coa[c] <=> coa[m]	-8034.1	8034.1		Transport, mitochondrial	1	-1000	1000	0	1		NOTES:NCD
COAtp	coenzyme A transport, peroxisomal	coa[c] <=> coa[x]				Transport, peroxisomal	1	-1000	1000	0	0		NOTES:transport between cytosol and Golgi/ER presumed presumed facilitated transport, but unknown co-substrates, see PMID: 12739170, Hirabayashi et al NJ changed name from ACCOArt to ACCOAtr for consistency - NCD
COAtr	COA transporter, endoplasmic reticulum	coa[c] <=> coa[r]				Transport, endoplasmic reticular	1	-1000	1000	0	4		NOTES:NCD	PMID:10510291,PMID:11101640,PMID:12739169,PMID:7835905,PMID:8476015,PMID:9425115,PMID:9508842,PMID:9649795,PMID:9786900,PMID:9824713
CORE2GTg	Core 2 acetylglucosaminyltransferase, Golgi apparatus	T_antigen[g] + uacgam[g] -> h[g] + udp[g] + core2[g]	(9245.1) or (2650.1) or (51301.1)	2650.1 51301.1 9245.1		O-glycan synthesis	0	0	1000	0	0		NOTES:NCD
CORE5GTg	Core 5 alpha-GalNAc-transferase, Golgi apparatus	udpacgal[g] + Tn_antigen[g] -> h[g] + udp[g] + core5[g]				O-glycan synthesis	0	0	1000	0	1		NOTES:unknown mechanism for transport - however must get to other intracellular compartments (e.g. lysosome for degradation) NJ	PMID:15907394
CORE7GTg	Core 7 alpha-GalNAc-transferase, Golgi apparatus	udpacgal[g] + Tn_antigen[g] -> h[g] + udp[g] + core7[g]				O-glycan synthesis	0	0	1000	0	1		NOTES:unknown mechanism for transport - however must get to other intracellular compartments (e.g. lysosome for degradation) NJ	PMID:15907394
CORE8GTg	N-acetylgalactosamine 3-alpha-galactosyltransferase, Golgi apparatus	udpgal[g] + Tn_antigen[g] -> h[g] + udp[g] + core8[g]				O-glycan synthesis	0	0	1000	0	2	2.4.1.102	NOTES:unknown mechanism, however these blood groups need to make it to the extracellular surface of cells NJ
CRMPte	crmp hs transport	crmp_hs[c] <=> crmp_hs[e]				Transport, extracellular	1	-1000	1000	0	2		NOTES:unknown mechanism, however these blood groups need to make it to the extracellular surface of cells NJ
CRNCAR3tp	carnitine-propcarnitine carrier, peroxisomal	crn[c] + pcrn[x] -> crn[x] + pcrn[c]				Transport, peroxisomal	0	0	1000	0	2		NOTES:unknown mechanism, however these blood groups need to make it to the extracellular surface of cells NJ
CRNCARtp	carnitine-acetylcarnitine carrier, peroxisomal	crn[c] + acrn[x] -> acrn[c] + crn[x]				Transport, peroxisomal	0	0	1000	0	2		NOTES:unknown mechanism, however these blood groups need to make it to the extracellular surface of cells NJ
CRNtim	L-carnitine transport out of mitochondria via diffusion	crn[m] -> crn[c]	-788.1	788.1		Transport, mitochondrial	0	0	1000	0	2		NOTES:NCD
CRNtx	carnitine transport peroxisome to mitochondria	dmnoncrn[x] <=> dmnoncrn[m]				Transport, peroxisomal	1	-1000	1000	0	2		NOTES:NCD
CRVNCtr	fatty acid transport via diffusion	crvnc[e] <=> crvnc[c]				Transport, extracellular	1	-1000	1000	0	2		NOTES:unknown mechanism - may be vesicular NJ
CSCPASEly	chondroitin sulfate C proteoglycan protease, lysosome (endosome)	h2o[l] + cspg_c[l] -> Ser_Gly_Ala_X_Gly[l] + cs_c[l]				Chondroitin sulfate degradation	0	0	1000	0	2		NOTES:NCD	PMID:2784441,PMID:3753439
CSDPASEly	chondroitin sulfate D proteoglycan protease, lysosome (endosome)	h2o[l] + cspg_d[l] -> Ser_Gly_Ala_X_Gly[l] + cs_d[l]				Chondroitin sulfate degradation	0	0	1000	0	4		NOTES:NCD	PMID:12499362
CSEPASEly	chondroitin sulfate E proteoglycan protease, lysosome (endosome)	h2o[l] + cspg_e[l] -> Ser_Gly_Ala_X_Gly[l] + cs_e[l]				Chondroitin sulfate degradation	0	0	1000	0	2		NOTES:NCD
CSm	citrate synthase	h2o[m] + accoa[m] + oaa[m] -> h[m] + coa[m] + cit[m]	(1431.1) or (1431.2)	1431.1 1431.2		Citric acid cycle	0	0	5.11588	0	4		NOTES:	PMID:10824116
CSNAT2m	carnitine O-aceyltransferase, mitochondrial	coa[m] + pcrn[m] <=> ppcoa[m] + crn[m]	-1384.1	1384.1		Fatty acid oxidation	1	-1000	1000	0	4		NOTES:NCD	PMID:11004509
CSNAT3x	carnitine O-aceyltransferase, peroxisomal	crn[x] + ppcoa[x] <=> coa[x] + pcrn[x]	-1384.2	1384.2		Fatty acid oxidation	1	-1000	1000	0	2		NOTES:NCD	PMID:2784441,PMID:3753439
CSNATer	carnitine O-acetyltransferase, endolasmic reticulum	accoa[r] + crn[r] <=> coa[r] + acrn[r]	-1384.3	1384.3		Fatty acid oxidation	1	-1000	1000	0	1	4.1.3.7	NOTES:unknown mechanism for transport - however must get to other intracellular compartments (e.g. lysosome for degradation) NJ	PMID:15907394
CSNATm	carnitine O-aceyltransferase, mitochondrial	coa[m] + acrn[m] <=> accoa[m] + crn[m]	-1384.1	1384.1		Fatty acid oxidation	1	-1000	1000	0	1	2.3.1.7	NOTES:unknown mechanism for transport - however must get to other intracellular compartments (e.g. lysosome for degradation) NJ	PMID:15907394
CSNATp	carnitine O-acetyltransferase, reverse direction, peroxisomal	accoa[x] + crn[x] <=> coa[x] + acrn[x]	-1384.2	1384.2		Fatty acid oxidation	1	-1000	1000	0	4	2.3.1.7	NOTES:NCD	PMID:10085243,PMID:14742432
CSNATr	carnitine O-acetyltransferase	accoa[c] + crn[c] <=> coa[c] + acrn[c]				Fatty acid oxidation	1	-1000	1000	0	4	2.3.1.7	NOTES:NCD	PMID:12459178
CSND	Cytosine deaminase	h2o[c] + h[c] + csn[c] -> nh4[c] + ura[c]				Pyrimidine catabolism	0	0	1000	0	4	2.3.1.7	NOTES:NJ	PMID:11283752,PMID:1517212
CSNt	cytosine transport via facilated diffusion	csn[e] <=> csn[c]	-3177.1	3177.1		Transport, extracellular	1	-1000	1000	0	1	2.3.1.7	NOTES:it
CSPG_Ctly	chondroitin sulfate C transport, extracellular to lysosome	cspg_c[e] -> cspg_c[l]				Transport, lysosomal	0	0	1000	0	4	2.3.1.7	NOTES:SAB This reaction represents the ATP driven secretion of ach from the cell. It leaves out the vesicle because that is not a compartment. ATP:H ratio is assumed as 1:3 for vacuolar ATPase and substrate:h ratio is 1:2. This gives a 3:2 ratio for substrate:ATP	PMID:12827358,PMID:15383652
CSPG_Dtly	chondroitin sulfate D transport, extracellular to lysosome	cspg_d[e] -> cspg_d[l]				Transport, lysosomal	0	0	1000	0	4	3.5.4.1	NOTES:ATP dependent citrate lyase. Reaction is reversible in KEGG (new EC 2.3.3.8) NCD	PMID:2295639
CSPG_Etly	chondroitin sulfate E transport, extracellular to lysosome	cspg_e[e] -> cspg_e[l]				Transport, lysosomal	0	0	1000	0	1		NOTES:unknown mechanism for transport - intracellular transport occurs, most details are unknown - see for example Varki glycobiology text or numerous reviews (PMID: 8206147) - extracellular transport is also made available since metabolites can get to outer plasma membrane NJ	PMID:8206147
CTPS1	CTP synthase (NH3)	nh4[c] + atp[c] + h[c] + utp[c] -> adp[c] + pi[c] + ctp[c]	-1503.1	1503.1		Nucleotide interconversion	0	0	1000	0	1		NOTES:unknown mechanism for transport - intracellular transport occurs, most details are unknown - see for example Varki glycobiology text or numerous reviews (PMID: 8206147) NJ	PMID:8206147
CTPtn	CTP diffusion in nucleus	ctp[c] <=> ctp[n]				Transport, nuclear	1	-1000	1000	0	1		NOTES:unknown mechanism for transport - intracellular transport occurs, most details are unknown - see for example Varki glycobiology text or numerous reviews (PMID: 8206147) - extracellular transport is also made available since metabolites can get to outer plasma membrane NJ	PMID:8206147
CYANt	Cyanide transport via diffusion (extracellular to cytosol)	cyan[e] <=> cyan[c]				Transport, extracellular	1	-1000	1000	0	1		NOTES:unknown mechanism for transport - intracellular transport occurs, most details are unknown - see for example Varki glycobiology text or numerous reviews (PMID: 8206147) NJ
CYSGLTH	Glutathione:cystine oxidoreductase	Lcystin[c] + 2 gthrd[c] <=> 2 cys_L[c] + gthox[c]				Methionine and cysteine metabolism	1	-1000	1000	0	2		NOTES:unknown mechanism, however these blood groups need to make it to the extracellular surface of cells NJ
CYSTA	cysteine transaminase	akg[c] + cys_L[c] <=> glu_L[c] + mercppyr[c]	-2805.1	2805.1		Methionine and cysteine metabolism	1	-1000	1000	0	2		NOTES:unknown mechanism, however these blood groups need to make it to the extracellular surface of cells NJ
CYTD	cytidine deaminase	h2o[c] + h[c] + cytd[c] -> nh4[c] + uri[c]	(978.1) or (57379.1)	57379.1 978.1		Pyrimidine catabolism	0	0	1000	0	1		NOTES:unknown mechanism for transport - intracellular transport occurs, most details are unknown - see for example Varki glycobiology text or numerous reviews (PMID: 8206147) - extracellular transport is also made available since metabolites can get to outer plasma membrane NJ	PMID:8206147
CYTDt	cytidine facilated transport in cytosol	cytd[e] <=> cytd[c]	(3177.1) or (2030.1)	2030.1 3177.1		Transport, extracellular	1	-1000	1000	0	1	1.8.4.4	NOTES:unknown mechanism for transport - intracellular transport occurs, most details are unknown - see for example Varki glycobiology text or numerous reviews (PMID: 8206147) NJ	PMID:8206147
CYTK3	cytidylate kinase (CMP)(GTP)	gtp[c] + cmp[c] <=> gdp[c] + cdp[c]	(26289.1) or (26289.2)	26289.1 26289.2		Nucleotide interconversion	1	-1000	1000	0	4	2.6.1.3	NOTES:EC-2.5.1.56 NCD	PMID:10749855
CYTK4	cytidylate kinase (dCMP)(GTP)	gtp[c] + dcmp[c] <=> gdp[c] + dcdp[c]	(26289.1) or (26289.2)	26289.1 26289.2		Nucleotide interconversion	1	-1000	1000	0	4	3.5.4.5	NOTES:EC-2.5.1.56 NCD	PMID:10749855
D3AIBTm	D-3-Amino-isobutanoate:pyruvate aminotransferase, mitochondrial	pyr[m] + 3aib_D[m] <=> 2mop[m] + ala_L[m]				Pyrimidine catabolism	1	-1000	1000	0	4		NOTES:H symport into lysososome. See PMID: 2768261 and PMID: 10581036 ( for human evidence). Sialic acid storage disorders (due to transporter mutations) require import and export e.g. PMID: 2768266 NJ	PMID:10581036,PMID:2768261
DADA	Deoxyadenosine deaminase	h2o[c] + h[c] + dad_2[c] -> nh4[c] + din[c]	-100.1	100.1		Nucleotide interconversion	0	0	1000	0	2		NOTES:NCD
DADAe	Deoxyadenosine deaminase, extracellular	h[e] + h2o[e] + dad_2[e] -> nh4[e] + din[e]	-100.1	100.1		Nucleotide interconversion	0	0	1000	0	1		NOTES:NCD
DADNK	deoxyadenosine kinase	atp[c] + 2 h[c] + dad_2[c] -> adp[c] + damp[c]				Nucleotide interconversion	0	0	1000	0	2	2.6.1.40	NOTES:unknown mechanism, however these blood groups need to make it to the extracellular surface of cells NJ
DADNt4	deoxyadenosine transport via diffusion	dad_2[e] <=> dad_2[c]				Transport, extracellular	1	-1000	1000	0	2	3.5.4.4	NOTES:unknown mechanism, however these blood groups need to make it to the extracellular surface of cells NJ
DAGK_hs	Diacylglycerol phosphate kinase (homo sapiens)	atp[c] + 2 h[c] + dag_hs[c] <=> adp[c] + pa_hs[c]	(9162.1) or (1607.1) or (8525.2) or (160851.1) or (1608.1) or (1607.2) or (8525.1) or (8527.1) or (1606.1) or (160851.2) or (8526.1) or (8525.3) or (1607.1) or (8527.2) or (1609.1)	1606.1 1607.1 1607.2 1608.1 160851.1 160851.2 1609.1 8525.1 8525.2 8525.3 8526.1 8527.1 8527.2 9162.1		Glycerophospholipid metabolism	1	-1000	1000	0	2	3.5.4.4	NOTES:JLR
DAGt	diacylglycerol transport	dag_hs[e] <=> dag_hs[c]				Transport, extracellular	1	-1000	1000	0	4	2.7.1.76	NOTES:MM	PMID:11013134
DASCBR	dehydroascorbate reductase	nadph[c] + dhdascb[c] -> nadp[c] + ascb_L[c]	(2745.1) or (51022.2) or (51022.1)	2745.1 51022.1 51022.2		Vitamin C metabolism	0	0	1000	0	4		NOTES:Assume NAD/NADH as acceptors Lumped long-chain acyl-CoA dehydrogenase (EC 1.3.99.13) This reaction is therefore equilivalent to trans-2-enoyl-CoA reductase (NAD) (EC 1.3.1.44)	PMID:2565344
DATPtn	dATP diffusion in nucleus	datp[c] <=> datp[n]				Transport, nuclear	1	-1000	1000	0	4	2.7.1.107	NOTES:MM	PMID:9214289
DCK1n	Deoxycytidine kinase, nuclear (ATP)	atp[n] + dcyt[n] <=> h[n] + dcmp[n] + adp[n]	-1633.1	1633.1		Nucleotide interconversion	1	-1000	1000	0	4	2.7.1.107	NOTES:MM	PMID:11013134
DCK2n	Deoxycytidine kinase, nuclear (UTP)	utp[n] + dcyt[n] <=> h[n] + dcmp[n] + udp[n]	-1633.1	1633.1		Nucleotide interconversion	1	-1000	1000	0	0	1.6.5.4	NOTES:NCD. measured in rat brain; 78.7 % identical enzyme cloned from human liver cDNA	PMID:16951743,PMID:16951744,PMID:6109001
DCMPDA	dCMP deaminase	h2o[c] + h[c] + dcmp[c] -> nh4[c] + dump[c]	-1635.1	1635.1		Pyrimidine catabolism	0	0	1000	0	4		NOTES:NCD	PMID:7876265,PMID:8159712
DCSPTN1COAtx	fatty acid intracellular transport	dcsptn1coa[c] <=> dcsptn1coa[x]				Transport, peroxisomal	1	-1000	1000	0	4	2.7.1.74	NOTES:tv rxn is now charge balanced; removed h - NCD	PMID:11756679,PMID:15507492
DCSPTN1t	fatty acid transport via diffusion	dcsptn1[e] <=> dcsptn1[c]				Transport, extracellular	1	-1000	1000	0	1	2.7.1.74	NOTES:	PMID:2006156
DCTPtn	dCTP diffusion in nucleus	dctp[c] <=> dctp[n]				Transport, nuclear	1	-1000	1000	0	0	3.5.4.12	NOTES:SMP. Biochemical	PMID:10419470,PMID:17244191,PMID:17244192
DCYTD	deoxycytidine deaminase	h2o[c] + h[c] + dcyt[c] -> nh4[c] + duri[c]	(978.1) or (57379.1)	57379.1 978.1		Pyrimidine catabolism	0	0	1000	0	0		NOTES:IF. Biochemical	PMID:10419470,PMID:17244191,PMID:17244192
DCYTt	deoxycytidine transport via diffusion	dcyt[e] <=> dcyt[c]				Transport, extracellular	1	-1000	1000	0	2		NOTES:noted in uniprot to have FAD as cofactor - further reaction specific lit evidence not found to support or contradict, see Baumgart et al PNAS (1996) 93: 13748-13753 analog as per KEGG added NJ	PMID:11181649
DEDOLP1_L	dehydrodolichol diphosphate phosphatase (liver)	h2o[c] + 0.1 dedoldp_L[c] -> h[c] + pi[c] + 0.1 dedolp_L[c]				N-glycan synthesis	0	0	1000	0	4		NOTES:noted in uniprot to have FAD as cofactor - further reaction specific lit evidence not found to support or contradict, see Baumgart et al PNAS (1996) 93: 13748-13753 NJ
DEDOLP2_L	dehydrodolichol phosphate phosphatase (liver)	h2o[c] + 0.1 dedolp_L[c] -> pi[c] + 0.1 dedol_L[c]				N-glycan synthesis	0	0	1000	0	2	3.5.4.14	NOTES:INVALID ECO TERM: IFH	PMID:8522318
DEDOLR_L	dehydrodolichol reductase (liver)	h[c] + nadph[c] + 0.1 dedol_L[c] -> nadp[c] + 0.1 dolichol_L[c]				N-glycan synthesis	0	0	1000	0	4		NOTES:NCD	PMID:14598172,PMID:977593
DESAT16_2	palmitoyl-CoA desaturase (n-C16:0CoA -> n-C16:1CoA)	o2[c] + h[c] + nadh[c] + pmtcoa[c] -> 2 h2o[c] + nad[c] + hdcoa[c]	-6319.1	6319.1		Fatty acid synthesis	0	0	1000	0	4		NOTES:	PMID:10843999,PMID:12623130
DESAT18_10	fatty acyl-CoA desaturase (n-C18:2CoA -> n-C18:3CoA)	o2[c] + h[c] + nadh[c] + lnlncacoa[c] -> 2 h2o[c] + nad[c] + strdnccoa[c]	-9415.1	9415.1		Fatty acid synthesis	0	0	1000	0	4		NOTES:AMF	PMID:10843999,PMID:12623130
DESAT18_3	stearoyl-CoA desaturase (n-C18:0CoA -> n-C18:1CoA)	o2[c] + h[c] + nadh[c] + stcoa[c] -> 2 h2o[c] + nad[c] + odecoa[c]	-6319.1	6319.1		Fatty acid synthesis	0	0	1000	0	2		NOTES:IF	PMID:11150295,PMID:4326157
DESAT18_4	stearoyl-CoA desaturase (n-C18:0CoA -> n-C18:1CoA)	o2[c] + h[c] + nadh[c] + stcoa[c] -> 2 h2o[c] + nad[c] + vacccoa[c]	-6319.1	6319.1		Fatty acid synthesis	0	0	1000	0	1	1.14.19.1	NOTES:SAB. Genetic and Biochemical	PMID:7989373,PMID:8397829,PMID:8574683
DESAT18_5	stearoyl-CoA desaturase (n-C18:0CoA -> n-C18:1CoA)	o2[c] + h[c] + nadh[c] + stcoa[c] -> 2 h2o[c] + nad[c] + od2coa[c]	-6319.1	6319.1		Fatty acid synthesis	0	0	1000	0	4	1.14.19.1	NOTES:SAB	PMID:8397829
DESAT18_6	fatty acyl-CoA desaturase (n-C18:1CoA -> n-C18:2CoA)	o2[c] + h[c] + nadh[c] + odecoa[c] -> 2 h2o[c] + nad[c] + lneldccoa[c]	-9415.1	9415.1		Fatty acid synthesis	0	0	1000	0	2	1.14.19.1	NOTES:NCD	PMID:10198029,PMID:15755952
DESAT18_7	fatty acyl-CoA desaturase (n-C18:1CoA -> n-C18:2CoA)	o2[c] + h[c] + nadh[c] + vacccoa[c] -> 2 h2o[c] + nad[c] + lneldccoa[c]	-9415.1	9415.1		Fatty acid synthesis	0	0	1000	0	4	1.14.19.1	NOTES:NCD	PMID:9651205
DESAT18_8	fatty acyl-CoA desaturase (n-C18:1CoA -> n-C18:2CoA)	o2[c] + h[c] + nadh[c] + od2coa[c] -> 2 h2o[c] + nad[c] + lneldccoa[c]	-9415.1	9415.1		Fatty acid synthesis	0	0	1000	0	2	1.14.19.1	NOTES:NCD	PMID:15755952
DESAT18_9	fatty acyl-CoA desaturase (n-C18:2CoA -> n-C18:3CoA)	o2[c] + h[c] + nadh[c] + lnlccoa[c] -> 2 h2o[c] + nad[c] + lnlncgcoa[c]	-9415.1	9415.1		Fatty acid synthesis	0	0	1000	0	4	1.14.99.25	NOTES:stoichiometry described in Thornalley PJ. Gen Pharmacol. 1996 Jun;27(4):565-73. PMID: 8853285 NCD	PMID:1537826,PMID:16037240,PMID:8853285
DESAT22_1p	fatty acyl-CoA desaturase (n-C22:4CoA -> n-C22:5CoA)	h[x] + nadh[x] + o2[x] + adrncoa[x] -> nad[x] + 2 h2o[x] + dcsptn1coa[x]				Fatty acid synthesis	0	0	1000	0	4	1.14.19.1	NOTES:stoichiometry described in Thornalley PJ. Gen Pharmacol. 1996 Jun;27(4):565-73. PMID: 8853285 NCD	PMID:1537826,PMID:16037240,PMID:8853285
DESAT22_2p	fatty acyl-CoA desaturase (n-C22:5CoA -> n-C22:6CoA)	h[x] + nadh[x] + o2[x] + clpndcoa[x] -> nad[x] + 2 h2o[x] + c226coa[x]				Fatty acid synthesis	0	0	1000	0	2	1.14.99.25	NOTES:Reaction from KEGG: an acylphosphate + H2O -&gt; a carboxylate + phosphate	PMID:3039264,PMID:7796909
DESAT24_1	fatty acyl-CoA desaturase (n-C24:5CoA -> n-C24:6CoA)	o2[c] + h[c] + nadh[c] + tetpent3coa[c] -> 2 h2o[c] + nad[c] + tethex3coa[c]	-9415.1	9415.1		Fatty acid synthesis	0	0	1000	0	4	1.14.99.25	NOTES:Added EC- JLR	PMID:12381379,PMID:15016824
DGAT	diacylglycerol acyltransferase	Rtotal3coa[c] + dag_hs[c] -> coa[c] + tag_hs[c]	(8694.1) or (84649.1)	84649.1 8694.1		Triacylglycerol synthesis	0	0	1000	0	4	1.14.19.1	NOTES:adenosine deaminase has been found on cell surface in human (Gonzales-Gronow et al, JBC, 2004,279,20993-20998). IT	PMID:12381379,PMID:15016824
DGCHOLte	bile acid intracellular transport	dgchol[e] <=> dgchol[c]				Transport, extracellular	1	-1000	1000	0	2	1.14.19.1	NOTES:TDV (Voet &amp; Voet pg 581) Non-enzymatic decarboxylation; spontaneous reaction added &quot;m&quot; suffix - NCD
DGK2m	deoxyguanylate kinase (dGMP:dATP) (mitochondrial)	datp[m] + dgmp[m] <=> dadp[m] + dgdp[m]				Nucleotide interconversion	1	-1000	1000	0	4	1.14.99.25	NOTES:NCD	PMID:12006583,PMID:12838422
DGNSKm	deoxyguanosine kinase	atp[m] + dgsn[m] -> 2 h[m] + adp[m] + dgmp[m]	(1716.5) or (1716.1) or (1716.4) or (1716.2) or (1716.3)	1716.1 1716.2 1716.3 1716.4 1716.5		Nucleotide interconversion	0	0	1000	0	4		NOTES:IT	PMID:12838422,PMID:15701636,PMID:2925670
DGSNt	deoyguanosine transport via diffusion	dgsn[e] <=> dgsn[c]				Transport, extracellular	1	-1000	1000	0	1		NOTES:unknown mechanism, presumptive &quot;diffusion&quot; - based on simulation/gap filling NJ
DGSNtm	deoyguanosine transport in mitochondria	dgsn[c] <=> dgsn[m]				Transport, mitochondrial	1	-1000	1000	0	4	2.7.4.8	NOTES:
DGTPtn	dGTP diffusion in nucleus	dgtp[c] <=> dgtp[n]				Transport, nuclear	1	-1000	1000	0	4	2.7.1.113	NOTES:NCD	PMID:11485571,PMID:195572,PMID:8843353,PMID:9434148
DGULND	dehydro-L-gulonate decarboxylase	h[c] + 3dhguln[c] <=> co2[c] + xylu_L[c]				Pentose phosphate pathway	1	-1000	1000	0	4		NOTES:JLR	PMID:9434148
DHAAt1r	dehydroascorbate transport (uniport)	dhdascb[e] <=> dhdascb[c]	(6515.1) or (6513.1) or (6517.1)	6513.1 6515.1 6517.1		Transport, extracellular	1	-1000	1000	0	4		NOTES:NCD	PMID:11485571
DHCR241r	24-dehydrocholesterol reductase [Precursor]	zymst[r] + fadh2[r] -> fad[r] + zymstnl[r]	-1718.1	1718.1		Cholesterol metabolism	0	0	1000	0	4		NOTES:Inorganic triphosphate can also act as donor This form was added for Staph based on KEGG evidence (SAB)	PMID:10215863
DHCR242r	24-dehydrocholesterol reductase [Precursor]	fadh2[r] + chlstol[r] -> fad[r] + lthstrl[r]	-1718.1	1718.1		Cholesterol metabolism	0	0	1000	0	4	4.1.1.34	NOTES:	PMID:2460457
DHCRD1	dihydroceramide desaturase	nadp[c] + dhcrm_hs[c] -> h[c] + nadph[c] + crm_hs[c]	(8560.1) or (8560.2)	8560.1 8560.2		Sphingolipid metabolism	0	0	1000	0	4		NOTES:JLR	PMID:10481931,PMID:11299302,PMID:11423534,PMID:11840511,PMID:12503609,PMID:12609998,PMID:12623444,PMID:1427768,PMID:14996950,PMID:15547246,PMID:7860067,PMID:7959689,PMID:8076676
DHCRD2	dihydroceramide desaturase	dhcrm_hs[c] + fad[c] -> crm_hs[c] + fadh2[c]	(8560.1) or (8560.2)	8560.1 8560.2		Sphingolipid metabolism	0	0	1000	0	4		NOTES:
DHFR	dihydrofolate reductase	h[c] + nadph[c] + dhf[c] <=> nadp[c] + thf[c]	-1719.1	1719.1		Folate metabolism	1	-1000	1000	0	1		NOTES:IT
DHORD9	dihydoorotic acid dehydrogenase (quinone10)	q10[m] + dhor_S[c] -> q10h2[m] + orot[c]	-1723.1	1723.1		Pyrimidine synthesis	0	0	1000	0	4		NOTES:IT	PMID:10722669,PMID:12838422
DHORTS	dihydroorotase	h2o[c] + dhor_S[c] <=> h[c] + cbasp[c]	-790.1	790.1		Pyrimidine synthesis	1	-1000	1000	0	4		NOTES:MM	PMID:12856181
DHPR	6,7-dihydropteridine reductase	h[c] + nadh[c] + dhbpt[c] -> nad[c] + thbpt[c]	-5860.1	5860.1		Tetrahydrobiopterin metabolism	0	0	1000	0	4	1.5.1.3	NOTES:IT	PMID:12838422,PMID:15701636,PMID:2925670
DHPR2	6,7-dihydropteridine reduction	5mthf[c] + dhbpt[c] -> h[c] + thbpt[c] + mlthf[c]				Tetrahydrobiopterin metabolism	0	0	1000	0	4	1.3.3.1	NOTES:IT	PMID:10722669,PMID:12838422,PMID:14607828
DIDPtn	dIDP nuclear transport	didp[c] <=> didp[n]				Transport, nuclear	1	-1000	1000	0	4	3.5.2.3	NOTES:Based on Yang et al, JBC, 2000, 275, 8844-8853	PMID:10567213,PMID:10722730,PMID:12717453
DIGALSIDEtl	digalside hs intracellular transport	digalside_hs[c] <=> digalside_hs[l]				Transport, lysosomal	1	-1000	1000	0	4	1.6.99.7	NOTES:Based on Yang et al, JBC, 2000, 275, 8844-8853 IT	PMID:10567213,PMID:10722730,PMID:12717453
DINt	deoxyinosine transport via diffusion	din[e] <=> din[c]				Transport, extracellular	1	-1000	1000	0	4		NOTES:	PMID:10567213,PMID:10722730,PMID:12717453
DITPtn	dITP nuclear transport	ditp[c] <=> ditp[n]				Transport, nuclear	1	-1000	1000	0	4		NOTES:IT	PMID:12427752,PMID:12948489,PMID:15347676
DKMPPD	2,3-diketo-5-methylthio-1-phosphopentane degradation reaction	h2o[c] + o2[c] + dkmpp[c] -> 2 h[c] + pi[c] + for[c] + 2kmb[c]				Arginine and Proline Metabolism	0	0	1000	0	4		NOTES:IT	PMID:8394137
D_LACt2	D-lactate transport via proton symport	h[e] + lac_D[e] <=> h[c] + lac_D[c]	(9194.1) or (23539.1) or (6566.1) or (9123.1)	23539.1 6566.1 9123.1 9194.1		Transport, extracellular	1	-1000	1000	0	4		NOTES:	PMID:14674717,PMID:15196008
DLNLCGt	fatty acid transport via diffusion	dlnlcg[e] <=> dlnlcg[c]				Transport, extracellular	1	-1000	1000	0	1		NOTES:most likely NOT physiological - detailed information about the peroxisomal transporters has not yet been achieved - this transport is most likely dependent on a concomitant energy consuming reaction (human ABC peroxisomal transporters: PEX family - check in future for new research articles describing biochemistry and stoichiometry) NJ
DMATTx	dimethylallyltranstransferase	dmpp[x] + ipdp[x] -> grdp[x] + ppi[x]	-2224.1	2224.1		Cholesterol metabolism	0	0	1000	0	2		NOTES:interaction between peroxisomes and ER (some enzymes on the outer membrane) NJ
DMNONCRNt	4,8 dimethylnonanoyl carnitine transport (mitochondria)	dmnoncrn[c] <=> dmnoncrn[m]				Fatty acid oxidation	1	-1000	1000	0	4		NOTES:NJ
DNADtn	dNAD transport, nuclear trhough pore	dnad[c] <=> dnad[n]				Transport, nuclear	1	-1000	1000	0	4		NOTES:NJ
DOLASNT_Ler	Dolichyl-diphosphooligosaccharide:protein-L-asparagine oligopolysaccharidotransferase (liver)	Asn_X_Ser_Thr[r] + 0.1 g3m8mpdol_L[r] -> h[r] + 0.1 doldp_L[r] + g3m8masn[r]	(6185.1 and 1650.1 and 6184.1 and 1603.1)	1603.1 1650.1 6184.1 6185.1		N-glycan synthesis	0	0	1000	0	4		NOTES:NJ
DOLDPP_Ler	Dolichyl-diphosphate phosphohydrolase, human (liver)	h2o[r] + 0.1 doldp_L[r] -> 0.1 dolp_L[r] + h[r] + pi[r]	-57171.1	57171.1		N-glycan synthesis	0	0	1000	0	4		NOTES:SAB This reaction represents the ATP driven secretion of adrnl from the cell. It leaves out the vesicle because that is not a compartment. ATP:H ratio is assumed as 1:3 for vacuolar ATPase and substrate:h ratio is 1:2. This gives a 3:2 ratio for substrate:ATP	PMID:12827358,PMID:15383652
DOLGLCP_Lter	Dolichyl beta-D-glucosyl phosphate flippase (liver)	0.1 dolglcp_L[c] -> 0.1 dolglcp_L[r]				N-glycan synthesis	0	0	1000	0	2		NOTES:NJ	PMID:11788354,PMID:12864740
DOLGLCP_Uter	Dolichyl beta-D-glucosyl phosphate flippase (uterus)	0.1 dolglcp_U[c] -> 0.1 dolglcp_U[r]				N-glycan synthesis	0	0	1000	0	1		NOTES:SAB	PMID:10679223
DOLGPP_Ler	Dolichyl-beta-D-glucosyl-phosphate dolichylphosphohydrolase (liver)	h2o[r] + 0.1 dolglcp_L[r] -> 0.1 dolp_L[r] + h[r] + glc_D[r]				N-glycan synthesis	0	0	1000	0	4		NOTES:	PMID:11931637,PMID:12716056
DOLGPP_Uer	Dolichyl-beta-D-glucosyl-phosphate dolichylphosphohydrolase (uterus)	h2o[r] + 0.1 dolglcp_U[r] -> h[r] + 0.1 dolp_U[r] + glc_D[r]				N-glycan synthesis	0	0	1000	0	4		NOTES:	PMID:1302001,PMID:2004782
DOLK_L	Dolichol kinase, human (liver)	ctp[c] + 0.1 dolichol_L[c] -> h[c] + cdp[c] + 0.1 dolp_L[c]				N-glycan synthesis	0	0	1000	0	4		NOTES:	PMID:1302001,PMID:2004782
DOLMANP_Lter	dolichol-phosphate mannose flippase (liver)	0.1 dolmanp_L[c] -> 0.1 dolmanp_L[r]				N-glycan synthesis	0	0	1000	0	2		NOTES:r0277	PMID:1592113
DOLP_Lter	dolichol phosphate flippase (liver)	0.1 dolglcp_L[r] + 0.1 m8mpdol_L[r] -> 0.1 dolp_L[r] + h[r] + 0.1 g1m8mpdol_L[r]				N-glycan synthesis	0	0	1000	0	2		NOTES:unknown mechanism, related cyp P450 metabolism reactions NJ
DOLPGT1_Ler	dolichyl-phosphate-glucose-glycolipid alpha-glucosyltransferase (liver)	0.1 dolglcp_L[r] + 0.1 g1m8mpdol_L[r] -> 0.1 dolp_L[r] + h[r] + 0.1 g2m8mpdol_L[r]	-29929.1	29929.1		N-glycan synthesis	0	0	1000	0	4		NOTES:NCD	PMID:10747980,PMID:11042166,PMID:12061784,PMID:12512857,PMID:15560372,PMID:15620693,PMID:9405606
DOLPGT2_Ler	dolichyl-phosphate-glucose-glycolipid alpha-glucosyltransferase (liver)	0.1 dolglcp_L[r] + 0.1 g2m8mpdol_L[r] -> 0.1 dolp_L[r] + h[r] + 0.1 g3m8mpdol_L[r]	(79053.1) or (79053.3) or (79053.2)	79053.1 79053.2 79053.3		N-glycan synthesis	0	0	1000	0	4		NOTES:NCD	PMID:10747980,PMID:11042166,PMID:12061784,PMID:12512857,PMID:15560372,PMID:15620693,PMID:9405606
DOLPH_Ler	Dolichol-phosphate phosphohydrolase, human (liver)	0.1 dolmanp_L[r] + 0.1 m4mpdol_L[r] -> 0.1 dolp_L[r] + h[r] + 0.1 m5mpdol_L[r]				N-glycan synthesis	0	0	1000	0	4		NOTES:NCD	PMID:10747980,PMID:11042166,PMID:12061784,PMID:12512857,PMID:15560372,PMID:15620693,PMID:9405606
DOLPMT_L	Dolichyl-phosphate D-mannosyltransferase (liver)	0.1 dolmanp_L[r] + 0.1 m5mpdol_L[r] -> 0.1 dolp_L[r] + h[r] + 0.1 m6mpdol_L[r]	(54344.2 and 8818.1 and 8813.1) or (8818.2 and 54344.1 and 8813.1) or (8818.1 and 54344.1 and 8813.1) or (54344.2 and 8818.2 and 8813.1)	54344.1 54344.2 8813.1 8818.1 8818.2		N-glycan synthesis	0	0	1000	0	4		NOTES:NCD	PMID:10747980,PMID:11042166,PMID:12061784,PMID:12512857,PMID:15560372,PMID:15620693,PMID:9405606
DOLPMT1_Ler	dolichyl-phosphate-mannose-glycolipid alpha-mannosyltransferase (liver)	0.1 dolmanp_L[r] + 0.1 m6mpdol_L[r] -> 0.1 dolp_L[r] + h[r] + 0.1 m7mpdol_L[r]	(10195.4) or (10195.1) or (10195.3) or (10195.2)	10195.1 10195.2 10195.3 10195.4		N-glycan synthesis	0	0	1000	0	4		NOTES:NCD	PMID:10747980,PMID:11042166,PMID:12061784,PMID:12512857,PMID:15560372,PMID:15620693,PMID:9405606
DOLPMT2_Ler	dolichyl-phosphate-mannose-glycolipid alpha-mannosyltransferase (liver)	0.1 dolmanp_L[r] + 0.1 m7mpdol_L[r] -> 0.1 dolp_L[r] + h[r] + 0.1 m8mpdol_L[r]				N-glycan synthesis	0	0	1000	0	4		NOTES:NCD	PMID:10747980,PMID:11042166,PMID:12061784,PMID:12512857,PMID:15560372,PMID:15620693,PMID:9405606
DOLPMT3_Ler	dolichyl-phosphate-mannose-glycolipid alpha-mannosyltransferase (liver)	gdpmann[c] + 0.1 dolp_L[c] -> gdp[c] + 0.1 dolmanp_L[c]	-79087.1	79087.1		N-glycan synthesis	0	0	1000	0	4		NOTES:NCD	PMID:10747980,PMID:11042166,PMID:12061784,PMID:12512857,PMID:15560372,PMID:15620693,PMID:9405606
DOLPMT4_Ler	dolichyl-phosphate-mannose-glycolipid alpha-mannosyltransferase (liver)	0.1 dolp_L[r] -> 0.1 dolp_L[c]				N-glycan synthesis	0	0	1000	0	4		NOTES:NCD	PMID:10747980,PMID:11042166,PMID:12061784,PMID:12512857,PMID:15560372,PMID:15620693,PMID:9405606
DOLPMT4_Uer	dolichyl-phosphate-mannose-glycolipid alpha-mannosyltransferase (uterus)	0.1 dolp_U[r] -> 0.1 dolp_U[c]				N-glycan synthesis	0	0	1000	0	4		NOTES:NCD	PMID:10747980,PMID:11042166,PMID:12061784,PMID:12512857,PMID:15560372,PMID:15620693,PMID:9405606
DOPASFt	Dopamine 3-0-sulfate transport (diffusion)	dopasf[c] -> dopasf[e]				Transport, extracellular	0	0	1000	0	4		NOTES:NCD	PMID:10747980,PMID:11042166,PMID:12061784,PMID:12512857,PMID:15560372,PMID:15620693,PMID:9405606
DOPASULT	Dopamine Sulfotransferase	paps[c] + dopa[c] -> h[c] + pap[c] + dopasf[c]	(6799.1) or (6817.3) or (6799.2) or (6818.2) or (6817.2) or (6818.1) or (6817.1) or (6817.4) or (6818.3) or (6817.5)	6799.1 6799.2 6817.1 6817.2 6817.3 6817.4 6817.5 6818.1 6818.2 6818.3		Tyrosine metabolism	0	0	1000	0	4		NOTES:NCD	PMID:10747980,PMID:11042166,PMID:12061784,PMID:12512857,PMID:15560372,PMID:15620693,PMID:9405606
DPMVDx	diphosphomevalonate decarboxylase	atp[x] + 5dpmev[x] -> h[x] + adp[x] + co2[x] + ipdp[x] + pi[x]	-4597.1	4597.1		Cholesterol metabolism	0	0	1000	0	4		NOTES:NCD	PMID:10747980,PMID:11042166,PMID:12061784,PMID:12512857,PMID:15560372,PMID:15620693,PMID:9405606
DRIBt	deoxyribose transport via diffusion	drib[e] <=> drib[c]				Transport, extracellular	1	-1000	1000	0	4		NOTES:NCD	PMID:10747980,PMID:11042166,PMID:12061784,PMID:12512857,PMID:15560372,PMID:15620693,PMID:9405606
DSAT	dihydrosphingosine N-acyltransferase	sphgn[c] + Rtotalcoa[c] -> h[c] + coa[c] + dhcrm_hs[c]				Sphingolipid metabolism	0	0	1000	0	4		NOTES:NCD	PMID:10747980,PMID:11042166,PMID:12061784,PMID:12512857,PMID:15560372,PMID:15620693,PMID:9405606
DTDPtn	dTDP nuclear transport	dtdp[c] <=> dtdp[n]				Transport, nuclear	1	-1000	1000	0	4		NOTES:NCD	PMID:10747980,PMID:11042166,PMID:12061784,PMID:12512857,PMID:15560372,PMID:15620693,PMID:9405606
DTMPK	dTMP kinase	atp[c] + 3 h[c] + dtmp[c] -> adp[c] + dtdp[c]	-1841.1	1841.1		Nucleotide interconversion	0	0	1000	0	4		NOTES:NCD	PMID:10747980,PMID:11042166,PMID:12061784,PMID:12512857,PMID:15560372,PMID:15620693,PMID:9405606
DTTPtn	dTTP diffusion in nucleus	dttp[c] <=> dttp[n]				Transport, nuclear	1	-1000	1000	0	4		NOTES:NCD	PMID:10747980,PMID:11042166,PMID:12061784,PMID:12512857,PMID:15560372,PMID:15620693,PMID:9405606
DUDPtn	dUDP nuclear transport	dudp[c] <=> dudp[n]				Transport, nuclear	1	-1000	1000	0	4		NOTES:NCD	PMID:10747980,PMID:11042166,PMID:12061784,PMID:12512857,PMID:15560372,PMID:15620693,PMID:9405606
DUMPtn	dUMP nuclear transport	dump[c] <=> dump[n]				Transport, nuclear	1	-1000	1000	0	2		NOTES:acetylglucosamine phosphate deacetylase; acetylaminodeoxyglucosephosphate acetylhydrolase; 2-acetamido-2-deoxy-D-glucose-6-phosphate amidohydrolase
DURIK1	deoxyuridine kinase (ATP:Deoxyuridine)	atp[c] + 2 h[c] + duri[c] -> adp[c] + dump[c]	(7083.1) or (7084.1)	7083.1 7084.1		Nucleotide interconversion	0	0	1000	0	0	2.5.1.1	NOTES:NJ
DURIPP	deoxyuridine phosphorylase	pi[c] + duri[c] <=> 2dr1p[c] + ura[c]	(4860.1) or (151531.1)	151531.1 4860.1		Nucleotide interconversion	1	-1000	1000	0	0		NOTES:NJ
DURIt	deoxyuridine transport via diffusion	duri[e] <=> duri[c]				Transport, extracellular	1	-1000	1000	0	2		NOTES:see Harper&apos;s Biochemistry &apos;Metabolism of Acylglycerols and Sphingolipids&apos; chapter currently charge imbalanced (+2) - charging of individual molecules consistent w/ known info at pH 7.4 NJ
DUTPDPm	dUTP diphosphatase	h2o[m] + dutp[m] <=> h[m] + ppi[m] + dump[m]	-1854.1	1854.1		Nucleotide interconversion	1	-1	1	0	0	2.4.1.119	NOTES:NJ
DUTPDPn	dUTP diphosphatase, nuclear	h2o[n] + dutp[n] -> ppi[n] + h[n] + dump[n]	-1854.1	1854.1		Nucleotide interconversion	0	0	1000	0	0	3.6.1.43	NOTES:takes place on outer peroxisomal membrane NJ
EBP1r	3-beta-hydroxysteroid-delta(8),delta(7)-isomerase	zymst[r] -> chlstol[r]	-10682.1	10682.1		Cholesterol metabolism	0	0	1000	0	0		NOTES:NJ
EBP2r	3-beta-hydroxysteroid-delta(8),delta(7)-isomerase	zymstnl[r] -> lthstrl[r]	-10682.1	10682.1		Cholesterol metabolism	0	0	1000	0	4		NOTES:SAB m	PMID:11804860,PMID:11914032,PMID:15028567,PMID:15465778
ECOAH1m	3-hydroxyacyl-CoA dehydratase (3-hydroxybutanoyl-CoA) (mitochondria)	3hbcoa[m] <=> h2o[m] + b2coa[m]	(549.1) or (3030.1) and (3032.1) or (1892.1)	1892.1 3030.1 3032.1 549.1		Tryptophan metabolism	1	-1000	1000	0	4	3.1.4.48	NOTES:FULLR corresponds to acyl/R groups in texts. NJ
ECOAH9m	2-Methylprop-2-enoyl-CoA (2-Methylbut-2-enoyl-CoA), mitochondrial	h2o[m] + 2mb2coa[m] <=> 3hmbcoa[m]	(1892.1) or (3030.1) and (3032.1)	1892.1 3030.1 3032.1		Valine, leucine, and isoleucine metabolism	1	-1000	1000	0	0	3.1.4.48	NOTES:for alkly glycerol phosphate reductase (transmembrane rxn) - in homo sapiens glycerolipid metabolism NJ
ELAIDt	fatty acid transport via diffusion	elaid[e] <=> elaid[c]				Transport, extracellular	1	-1000	1000	0	1	2.7.1.108	NOTES:NCD
ENGASEly	endo-beta-N-acetylglucosaminidase, lysosomal	h2o[l] + s2l2n2m2m[l] -> acgam[l] + s2l2n2m2mn[l]				N-glycan degradation	0	0	1000	0	4		NOTES:NJ
ENO	enolase	2pg[c] <=> h2o[c] + pep[c]	(2023.1) or (2027.2) or (2027.1) or (2026.1)	2023.1 2026.1 2027.1 2027.2		Glycolysis/gluconeogenesis	1	-1000	1000	0	4		NOTES:NCD	PMID:15240345,PMID:9038835,PMID:9783918
ESTRADIOLt	estradiol transport	estradiol[e] <=> estradiol[c]				Transport, extracellular	1	-1000	1000	0	4		NOTES:NCD	PMID:1703535,PMID:9038835,PMID:9783918
ESTRADIOLtr	estradiol intracellular transport	estradiol[r] <=> estradiol[c]				Transport, endoplasmic reticular	1	-1000	1000	0	2		NOTES:for MDR transport NJ
ESTRONESt	estrone 3-sulfate transport via bicarbonate countertransport	hco3[c] + estrones[e] <=> hco3[e] + estrones[c]	(11309.1) or (10599.1) or (53919.1) or (6579.1) or (28232.1) or (28231.1) or (28234.1)	10599.1 11309.1 28231.1 28232.1 28234.1 53919.1 6579.1		Transport, extracellular	1	-1000	1000	0	2	3.1.3.51	NOTES:unknown mechanism, however glucuronidated metabolites need to get out of the cell NJ
ESTRONEtr	estrone intracellular transport	estrone[r] <=> estrone[c]				Transport, endoplasmic reticular	1	-1000	1000	0	4	2.4.1.83	NOTES:	PMID:12590576,PMID:2596825
ESTSULT	Estrogen sulfotransferase	paps[c] + estrone[c] -> h[c] + pap[c] + estrones[c]	(6783.1) or (6817.4) or (6817.1) or (6817.3) or (6817.2) or (6817.5)	6783.1 6817.1 6817.2 6817.3 6817.4 6817.5		Steroid metabolism	0	0	1000	0	2	2.4.1.130	NOTES:NCD
ETF	electron transfer flavoprotein	fadh2[m] + etfox[m] -> fad[m] + etfrd[m]	(2109.2) and (2108.1) or (2109.1) and (2108.1)	2108.1 2109.1 2109.2		Fatty acid oxidation	0	0	1000	0	1	2.4.1.130	NOTES:NJ
ETFQO	Electron transfer flavoprotein-ubiquinone oxidoreductase	q10[m] + etfrd[m] -> q10h2[m] + etfox[m]	-2110.1	2110.1		Fatty acid oxidation	0	0	1000	0	4	2.4.1.130	NOTES:NCD	PMID:10336991,PMID:11707436,PMID:12706724
ETOHt	ethanol reversible transport	etoh[e] <=> etoh[c]				Transport, extracellular	1	-1000	1000	0	4	2.4.1.130	NOTES:NCD	PMID:10336991,PMID:11707436,PMID:12706724
ETOHtx	ethanol reversible peroxisomal transport	etoh[c] <=> etoh[x]				Transport, peroxisomal	1	-1000	1000	0	4	2.4.1.130	NOTES:	PMID:11948179,PMID:14966129,PMID:9378707
EX_11_cis_retfa(e)	fatty acid 11-cis-retinol exchange	11_cis_retfa[e] <=>				Exchange/demand reaction	1	-1	1000	0	4		NOTES:
EX_2425dhvitd3(e)	24R,25-Dihydroxyvitamin D3 exchange	2425dhvitd3[e] <=>				Exchange/demand reaction	1	-1	1000	0	2	2.8.2.1	NOTES:	PMID:2004782,PMID:2253271,PMID:8106516
EX_25hvitd3(e)	25-Hydroxyvitamin D3 exchange	25hvitd3[e] <=>				Exchange/demand reaction	1	-1	1000	0	0	5.4.2.4	NOTES:EC taken from Ligand TV. Genetic	PMID:1542694
EX_2mcit(e)	2-Methylcitrate exchange	2mcit[e] <=>				Exchange/demand reaction	1	-1	1000	0	4	5.4.2.1	NOTES:TV	PMID:14598172
EX_4nph(e)	4-Nitrophenol exchange	4nph[e] <=>				Exchange/demand reaction	1	-1	1000	0	4	4.1.1.33	NOTES:NCD	PMID:10099705,PMID:10794676
EX_4nphsf(e)	4-Nitrophenyl sulfate exchange	4nphsf[e] <=>				Exchange/demand reaction	1	-1	1000	0	0		NOTES:unknown mechanism NJ
EX_5mthf(e)	exchange reaction for 5-Methyltetrahydrofolate	5mthf[e] ->				Exchange/demand reaction	0	-1000	0	0	4		NOTES:NJ	PMID:8486699
EX_9_cis_retfa(e)	fatty acid 9-cis-retinol exchange	9_cis_retfa[e] <=>				Exchange/demand reaction	1	-1	1000	0	4		NOTES:NJ
EX_abt(e)	L-Arabinitol exchange	abt[e] <=>				Exchange/demand reaction	1	-1	1000	0	4		NOTES:NJ
EX_ac(e)	Acetate exchange	ac[e] <=>				Exchange/demand reaction	1	-1	1000	0	4		NOTES:refs: uniprot, KEGG DW Russell bile acid synthesis review paper (see human recon journal citations) NJ
EX_acac(e)	Acetoacetate exchange	acac[e] <=>				Exchange/demand reaction	1	-1	1000	0	4		NOTES:refs: uniprot, KEGG DW Russell bile acid synthesis review paper (see human recon journal citations) NJ
EX_acald(e)	Acetaldehyde exchange	acald[e] <=>				Exchange/demand reaction	1	-1	1000	0	4		NOTES:SAB see Kanai and Hediger 2004 (2003), PMID 14530974	PMID:14530974
EX_ade(e)	Adenine exchange	ade[e] <=>				Exchange/demand reaction	1	-1	1000	0	4	2.7.1.21	NOTES:SAB see Kanai and Hediger 2004 (2003), PMID 14530974	PMID:14530974
EX_adn(e)	exchange reaction for Adenosine	adn[e] ->				Exchange/demand reaction	0	-1000	0	0	2		NOTES:	PMID:10734121,PMID:10863037,PMID:14770310
EX_adp	adp exchange	adp[e] <=>				Exchange/demand reaction	1	-1	1000	0	2		NOTES:	PMID:10734121,PMID:10863037,PMID:14770310
EX_adprbp(e)	ADPribose 2'-phosphate exchange	adprbp[e] <=>				Exchange/demand reaction	1	-1	1000	0	2	3.6.1.23	NOTES:	PMID:10734121,PMID:10863037,PMID:14770310
EX_adprib(e)	ADPribose exchange	adprib[e] <=>				Exchange/demand reaction	1	-1	1000	0	4	3.6.1.23	NOTES:SAB see Kanai and Hediger 2004 (2003), PMID 14530974	PMID:14530974
EX_adrn(e)	adrenic acid exchange	adrn[e] <=>				Exchange/demand reaction	1	-1	1000	0	2	5.3.3.5	NOTES:	PMID:10734121,PMID:10863037,PMID:14770310
EX_ak2lgchol_hs(e)	1-alkyl 2-lysoglycerol 3-phosphocholine exchange	ak2lgchol_hs[e] <=>				Exchange/demand reaction	1	-1	1000	0	1	5.3.3.5	NOTES:
EX_akg(e)	2-Oxoglutarate exchange	akg[e] <=>				Exchange/demand reaction	1	-1	1000	0	4	4.2.1.17	NOTES:SAB see Kanai and Hediger 2004 (2003), PMID 14530974	PMID:14530974
EX_ala_D(e)	D-Alanine exchange	ala_D[e] <=>				Exchange/demand reaction	1	-1	1000	0	2	4.2.1.17	NOTES:NCD	PMID:2263504
EX_ala_L(e)	exchange reaction for L-alanine	ala_L[e] <=>				Exchange/demand reaction	1	-0.05	1000	0	2		NOTES:NCD	PMID:11390972,PMID:11959859
EX_amp(e)	AMP exchange	amp[e] <=>				Exchange/demand reaction	1	-1	1000	0	4	3.2.1.96	NOTES:NCD SAB lyso	PMID:11390972,PMID:11959859
EX_arab_L(e)	L-Arabinose exchange	arab_L[e] <=>				Exchange/demand reaction	1	-1	1000	0	4	4.2.1.11	NOTES:tv Mendz pg. 201 Reversibility is unclear.	PMID:10747860,PMID:10891391,PMID:10930503,PMID:11325958,PMID:11342143,PMID:11414754,PMID:11591158,PMID:11891586,PMID:12049641,PMID:1348489,PMID:14770310,PMID:7534987,PMID:8954799
EX_arachd(e)	nC20:4 exchange	arachd[e] <=>				Exchange/demand reaction	1	-1	1000	0	4		NOTES:	PMID:11863375
EX_arg_L(e)	L-Arginine exchange	arg_L[e] <=>				Exchange/demand reaction	1	-0.05	1000	0	4		NOTES:SAB see Kanai and Hediger 2004 (2003), PMID 14530974	PMID:14530974
EX_ascb_L(e)	L-Ascorbate exchange	ascb_L[e] <=>				Exchange/demand reaction	1	-100	1000	0	4		NOTES:SAB based om PMID 10823827	PMID:10823827,PMID:12845534
EX_asn_L(e)	exchange reaction for L-asparagine	asn_L[e] <=>				Exchange/demand reaction	1	-1	1000	0	4		NOTES:	PMID:11128434,PMID:11762128,PMID:12592711,PMID:9806434
EX_asp_L(e)	L-Aspartate exchange	asp_L[e] <=>				Exchange/demand reaction	1	-0.05	1000	0	2	2.8.2.4	NOTES:NCD	PMID:15987839,PMID:2296157
EX_atp(e)	ATP exchange	atp[e] <=>				Exchange/demand reaction	1	-1	1000	0	2		NOTES:NCD	PMID:15987839,PMID:2296157
EX_avite1(e)	alpha-Tocopherol exchange	avite1[e] <=>				Exchange/demand reaction	1	-1	1000	0	2	1.5.5.1	NOTES:NCD	PMID:15987839,PMID:2296157
EX_avite2(e)	alpha-Tocotrienol exchange	avite2[e] <=>				Exchange/demand reaction	1	-1	1000	0	2		NOTES:NCD	PMID:15987839,PMID:2296157
EX_bhb(e)	(R)-3-Hydroxybutanoate transport via H+ symport	bhb[e] <=>				Exchange/demand reaction	1	-1	1000	0	0		NOTES:NCD	PMID:11762128,PMID:12592711
EX_biocyt(e)	Biocytin exchange	biocyt[e] <=>				Exchange/demand reaction	1	-1	1000	0	0		NOTES:NCD	PMID:11003211,PMID:14576493,PMID:19382904,PMID:19382905
EX_btn(e)	Biotin exchange	btn[e] <=>				Exchange/demand reaction	1	-0.005	1000	0	1		NOTES:NCD. The formation rate of IAA from IAL was used to measure ALDH activity (9884322). Another ref. 2437936 for human blood aldehyde dehydrogenase	PMID:18983992,PMID:18983993,PMID:9884322
EX_bvite(e)	beta-tocopherol exchange	bvite[e] <=>				Exchange/demand reaction	1	-1	1000	0	1		NOTES:NCD. Presence of cytoplasmic and mitochondrial isozymes of human aldehyde dehydrogenase (E.C. 1.2.1.3). Genetic ref. 8621661 for Delta-1-pyrroline-5-carboxylate dehydrogenase	PMID:18983992,PMID:18983993,PMID:6377948
EX_camp(e)	cAMP exchange	camp[e] <=>				Exchange/demand reaction	1	-1	1000	0	2		NOTES:NJ	PMID:11591435,PMID:8528251
EX_cgly(e)	Cys-Gly exchange	cgly[e] <=>				Exchange/demand reaction	1	-1	1000	0	0		NOTES:Only acetaldehyde considered for now. See also 1.2.1.4. Wide specificity, including oxidation of D-glucuronolactone to D-glucarate. Formerly EC 1.1.1.70; r0176	PMID:12616643
EX_chsterol(e)	exchange reaction for cholesterol	chsterol[e] <=>				Exchange/demand reaction	1	-1	1000	0	0		NOTES:NCD. For NAD	PMID:18983992,PMID:18983993,PMID:19382904,PMID:19382905
EX_chtn(e)	chitin exchange	chtn[e] <=>				Exchange/demand reaction	1	-1	1000	0	0		NOTES:See also ALDH1 (1.2.1.3); r0177	PMID:12616643
EX_cit(e)	Citrate exchange	cit[e] <=>				Exchange/demand reaction	1	-1	1000	0	2		NOTES:specific mechanism not known NJ
EX_CLPND(e)	clupanodonic acid (docosapentaenoic (n-3)) exchange	clpnd[e] <=>				Exchange/demand reaction	1	-1	1000	0	2		NOTES:specific mechanism not known NJ
EX_cmp(e)	CMP exchange	cmp[e] <=>				Exchange/demand reaction	1	-1	1000	0	4		NOTES:added for staph (SAB)	PMID:3042787
EX_co2(e)	CO2 exchange	co2[e] <=>				Exchange/demand reaction	1	-100	1000	0	4		NOTES:NJ	PMID:2217179,PMID:2377602
EX_crmp_hs(e)	Ceramide 1-phosphate exchange	crmp_hs[e] <=>				Exchange/demand reaction	1	-1	1000	0	4		NOTES:	PMID:9618483
EX_crvnc(e)	nC22:6 exchange	crvnc[e] <=>				Exchange/demand reaction	1	-1	1000	0	4		NOTES:Converts arachidonic acid to 15S-hydroperoxyeicosatetraenoic acid. Also acts on C-12 of arachidonate as well as on linoleic acid. NJ	PMID:11839751
EX_csn(e)	Cytosine exchange	csn[e] <=>				Exchange/demand reaction	1	-1	1000	0	4		NOTES:cofactors + usage still not clear see version ALOX5b for ATP concomittant hydrolysis - literature notes in vitro requirement for Ca and ATP for activity in addition to Fe	PMID:2829172
EX_cspg_c(e)	chondroitin sulfate C (GalNAc6S-GlcA) proteoglycan exchange	cspg_c[e] <=>				Exchange/demand reaction	1	-1	1000	0	4		NOTES:cofactors + usage still not clear unknown mechanism - biochemistry supported by PMID: 2829172, 11160764	PMID:11160764
EX_cspg_d(e)	chondroitin sulfate D (GlcNAc6S-GlcA2S) proteoglycan exchange	cspg_d[e] <=>				Exchange/demand reaction	1	-1	1000	0	4		NOTES:NCD	PMID:12071861,PMID:1537826,PMID:9823300
EX_cspg_e(e)	chondroitin sulfate E (GalNAc4,6diS-GlcA) proteoglycan exchange	cspg_e[e] <=>				Exchange/demand reaction	1	-1	1000	0	4		NOTES:NCD	PMID:12071861,PMID:1537826,PMID:9823300
EX_cyan(e)	Hydrogen cyanide exchange	cyan[e] <=>				Exchange/demand reaction	1	-1	1000	0	2		NOTES:should be analogous to AMACRp as per KEGG - in this case: reductase not a racemase NJ
EX_cys_L(e)	exchange reaction for L-cysteine	cys_L[e] ->				Exchange/demand reaction	0	-0.05	0	0	2		NOTES:should be analogous to AMACRr as per KEGG - in this case: reductase not a racemase NJ
EX_cytd(e)	exchange reaction for Cytidine	cytd[e] ->				Exchange/demand reaction	0	-1000	0	0	4		NOTES:see Russell bile acid biosynthesis review uniprot NJ
EX_dad_2(e)	exchange reaction for 2-deoxyadenosine	dad_2[e] ->				Exchange/demand reaction	0	-1000	0	0	4		NOTES:see Russell bile acid biosynthesis review uniprot NJ
EX_dag_hs(e)	exchange reaction for diglyceride	dag_hs[e] ->				Exchange/demand reaction	0	-1000	0	0	4		NOTES:JLR - Kegg R02705	PMID:10330343,PMID:10431835,PMID:11308027
EX_dcsptn1(e)	docosa-4,7,10,13,16-pentaenoic acid (n-6) exchange	dcsptn1[e] <=>				Exchange/demand reaction	1	-1	1000	0	4		NOTES:not sure about name NCD
EX_dcyt(e)	exchange reaction for Deoxycytidine	dcyt[e] ->				Exchange/demand reaction	0	-1000	0	0	1		NOTES:NJ
EX_dgsn(e)	exchange reaction for Deoxyguanosine	dgsn[e] ->				Exchange/demand reaction	0	-1000	0	0	4		NOTES:Added by RS/TV (6/17/05)	PMID:14674884
EX_dhdascb(e)	exchange reaction for dehydroascorbide(1-)	dhdascb[e] ->				Exchange/demand reaction	0	-1000	0	0	2		NOTES:NCD
EX_din(e)	exchange reaction for Deoxyinosine	din[e] ->				Exchange/demand reaction	0	-1000	0	0	4		NOTES:	PMID:1400401,PMID:2345176
EX_dopa(e)	Dopamine exchange	dopa[e] <=>				Exchange/demand reaction	1	-1	1000	0	1		NOTES:SAB. activity measured in cytosol rat liver; IT IS leucine aminopeptidase (EC3.4.11.1) NOT alanyl aminopeptidase EC3.4.11.2 which shows &gt; 80% of the activity; sequence homology rat-human not yet verified; annotation &apos;extracellular&apos; under B column ERROR	PMID:12675513
EX_dopasf(e)	Dopamine 3-O-sulfate exchange	dopasf[e] <=>				Exchange/demand reaction	1	-1	1000	0	4		NOTES:SAB. rat lumen renal proximal tubule preparation cysteinylglycine metabolism measured due to aminopeptidase M (=N); the annotation in BiGG of strong biochemical evidence in a textbook could not be found in the Google Books version search of this book; intensively sought for human metabolism; human metabolism is likely though not proven directly	PMID:6126478
EX_drib(e)	Deoxyribose exchange	drib[e] <=>				Exchange/demand reaction	1	-1	1000	0	0		NOTES:&quot;diffusion&quot; NJ
EX_duri(e)	exchange reaction for Deoxyuridine	duri[e] <=>				Exchange/demand reaction	1	-1	1000	0	1		NOTES:diffusion NJ
EX_elaid(e)	elaidic acid exchange	elaid[e] <=>				Exchange/demand reaction	1	-1	1000	0	0		NOTES:NCD
EX_estradiol(e)	estradiol exchange	estradiol[e] <=>				Exchange/demand reaction	1	-1	1000	0	0		NOTES:NCD
EX_estrones(e)	Estrone 3-sulfate exchange	estrones[e] <=>				Exchange/demand reaction	1	-1	1000	0	2		NOTES:for MDR transport mechanism NJ
EX_etoh(e)	Ethanol exchange	etoh[e] <=>				Exchange/demand reaction	1	-1	1000	0	1		NOTES:
EX_fe2(e)	EX fe2(u)	fe2[e] <=>				Exchange/demand reaction	1	-1	1000	0	1		NOTES:specific mechanism not known, proton dependence for trans-mit transport has been suggested, however directionality and stoichiometry has not yet been elucidated. see PMID: 12770731 and others NJ
EX_fol(e)	exchange reaction for Folate	fol[e] ->				Exchange/demand reaction	0	-0.005	0	0	2		NOTES:specific mechanism not known, proton dependence for trans-mit transport has been suggested, however directionality and stoichiometry has not yet been elucidated. see PMID: 12770731 and others NJ
EX_fuc_L(e)	L-Fucose exchange	fuc_L[e] <=>				Exchange/demand reaction	1	-1	1000	0	2		NOTES:unknown mechanism, related cyp P450 metabolism reactions NJ
EX_gal(e)	exchange reaction for D-Galactose	gal[e] ->				Exchange/demand reaction	0	-1000	0	0	2		NOTES:Spontaneous reaction	PMID:12097150
EX_gam(e)	exchange reaction for D-Glucosamine	gam[e] ->				Exchange/demand reaction	0	-1000	0	0	4		NOTES:IT	PMID:7767787,PMID:9479504
EX_gchola(e)	Glycocholate exchange	gchola[e] <=>				Exchange/demand reaction	1	-1	1000	0	1		NOTES:SAB	PMID:15304357
EX_glc(e)	D-Glucose exchange	glc_D[e] <=>				Exchange/demand reaction	1	-0.2718	1000	0	1		NOTES:unknown mechanism, xenobiotic transport (original and metabolized) NJ
EX_gln_L(e)	exchange reaction for L-glutamine	gln_L[e] <=>				Exchange/demand reaction	1	-0.0765	1000	0	2		NOTES:IT faked reaction to balance reaction in human biotin metabolism	PMID:10191093
EX_glu_L(e)	L-Glutamate exchange	glu_L[e] <=>				Exchange/demand reaction	1	-0.05	1000	0	2		NOTES:IT faked reaction to balance reaction in human biotin metabolism
EX_gly(e)	exchange reaction for Glycine	gly[e] ->				Exchange/demand reaction	0	-0.05	0	0	2		NOTES:
EX_glyc(e)	Glycerol exchange	glyc[e] ->				Exchange/demand reaction	0	-1000	0	0	2		NOTES:
EX_gsn(e)	exchange reaction for Guanosine	gsn[e] ->				Exchange/demand reaction	0	-1000	0	0	2		NOTES:unknown mechanism, xenobiotic transport (original and metabolized) NJ
EX_gthrd(e)	Reduced glutathione exchange	gthrd[e] <=>				Exchange/demand reaction	1	-0.05	1000	0	1		NOTES:unknown mechanism NJ
EX_gua(e)	Guanine exchange	gua[e] <=>				Exchange/demand reaction	1	-1	1000	0	1		NOTES:NCD	PMID:4156831
EX_h(e)	exchange reaction for proton	h[e] <=>				Exchange/demand reaction	1	-10	1000	0	2		NOTES:IT Cobalamin is normally bound to a transcobalami (I-III). Uptake is normally via endocytoces (via lysosome). It is thought that the accobal is release from lysosome in unbounded form but references are contradictory.	PMID:14633777
EX_h2o(e)	H2O exchange	h2o[e] <=>				Exchange/demand reaction	1	-100	1000	0	2		NOTES:	PMID:12359133,PMID:15234337,PMID:2167807
EX_h2o2(e)	Hydrogen peroxide exchange	h2o2[e] <=>				Exchange/demand reaction	1	-1	1000	0	4		NOTES:	PMID:12071861,PMID:12359133,PMID:15234337,PMID:9823300
EX_ha(e)	hyaluronan exchange	ha[e] <=>				Exchange/demand reaction	1	-1	1000	0	2		NOTES:interaction between peroxisomes and ER (some enzymes on the outer membrane) NJ
EX_hco3(e)	Bicarbonate exchange	hco3[e] <=>				Exchange/demand reaction	1	-10	1000	0	4		NOTES:NJ
EX_hdca(e)	Hexadecanoate (n-C16:0) exchange	hdca[e] <=>				Exchange/demand reaction	1	-1	1000	0	4		NOTES:NJ
EX_hdcea(e)	exchange reaction for Hexadecenoate (n-C16:1)	hdcea[e] ->				Exchange/demand reaction	0	-1000	0	0	4		NOTES:NJ
EX_his_L(e)	exchange reaction for L-histidine	his_L[e] <=>				Exchange/demand reaction	1	-0.01	1000	0	2		NOTES:interaction between peroxisomes and ER (some enzymes on the outer membrane) NJ
EX_hspg(e)	heparan sulfate proteoglycan exchange	hspg[e] <=>				Exchange/demand reaction	1	-1	1000	0	2		NOTES:NJ	PMID:11788354,PMID:12864740
EX_hxan(e)	Hypoxanthine exchange	hxan[e] <=>				Exchange/demand reaction	1	-1	1000	0	1		NOTES:unknown mechanism, presumed diffusion NJ
EX_idp(e)	IDP exchange	idp[e] <=>				Exchange/demand reaction	1	-1	1000	0	2		NOTES:NJ	PMID:11788354,PMID:12864740
EX_ile_L(e)	L-Isoleucine exchange	ile_L[e] <=>				Exchange/demand reaction	1	-0.01	1000	0	4		NOTES:SAB m	PMID:14752610
EX_ins(e)	Inosine exchange	ins[e] ->				Exchange/demand reaction	0	-1000	0	0	4		NOTES:SAB see PMID 14770310	PMID:14770310
EX_ksi(e)	keratan sulfate I exchange	ksi[e] <=>				Exchange/demand reaction	1	-1	1000	0	4		NOTES:	PMID:1008818
EX_ksi_deg1(e)	keratan sulfate I, degradation product 1 exchange	ksi_deg1[e] <=>				Exchange/demand reaction	1	-1	1000	0	4		NOTES:SAB m	PMID:9144563
EX_ksii_core2(e)	keratan sulfate II (core 2-linked) exchange	ksii_core2[e] <=>				Exchange/demand reaction	1	-1	1000	0	4		NOTES:	PMID:11747432,PMID:12408190,PMID:3463959
EX_ksii_core4(e)	keratan sulfate II (core 4-linked) exchange	ksii_core4[e] <=>				Exchange/demand reaction	1	-1	1000	0	4		NOTES:
EX_lac_D(e)	D-lactate exchange	lac_D[e] <=>				Exchange/demand reaction	1	-1	1000	0	2		NOTES:SAB	PMID:11133652,PMID:12719981
EX_lac_L(e)	L-Lactate exchange	lac_L[e] <=>				Exchange/demand reaction	1	-1	1000	0	4		NOTES:SAB	PMID:11342143,PMID:11414754,PMID:11591158,PMID:11891586,PMID:12049641,PMID:1348489,PMID:14770310,PMID:7534987,PMID:8954799
EX_Lcystin(e)	L-Cystine exchange	Lcystin[e] <=>				Exchange/demand reaction	1	-1	1000	0	4		NOTES:TDV	PMID:14598172
EX_leuktrA4(e)	leukotriene A4 exchange	leuktrA4[e] <=>				Exchange/demand reaction	1	-1	1000	0	4		NOTES:NJ	PMID:2562955
EX_leuktrB4(e)	leukotriene B4 exchange	leuktrB4[e] <=>				Exchange/demand reaction	1	-1	1000	0	0		NOTES:HR fatty acid metabolism - R groups = acyl groups, Rtotal, Rtotal2, Rtotal3 correspond to three possible acyl groups added to glycerol Carbon stoichiometry normalized wrt C16 R1 - C16 groups R2 - essential FA + associated derivatives R3 - non-essential, dietary FA (C18) R4 - monounsaturated FA R5 -other (C26, C24) NJ
EX_leuktrC4(e)	Leukotriene C4 exchange	leuktrC4[e] <=>				Exchange/demand reaction	1	-1	1000	0	0		NOTES:HR fatty acid metabolism - R groups = acyl groups, Rtotal, Rtotal2, Rtotal3 correspond to three possible acyl groups added to glycerol Carbon stoichiometry normalized wrt C16 R1 - C16 groups R2 - essential FA + associated derivatives R3 - non-essential, dietary FA (C18) R4 - monounsaturated FA R5 -other (C26, C24) NJ
EX_leuktrD4(e)	leukotriene D4 exchange	leuktrD4[e] <=>				Exchange/demand reaction	1	-1	1000	0	0		NOTES:HR fatty acid metabolism - R groups = acyl groups, Rtotal, Rtotal2, Rtotal3 correspond to three possible acyl groups added to glycerol Carbon stoichiometry normalized wrt C16 R1 - C16 groups R2 - essential FA + associated derivatives R3 - non-essential, dietary FA (C18) R4 - monounsaturated FA R5 -other (C26, C24) NJ
EX_leuktrE4(e)	leukotriene E4 exchange	leuktrE4[e] <=>				Exchange/demand reaction	1	-1	1000	0			NOTES:
EX_leuktrF4(e)	leukotriene F4 exchange	leuktrF4[e] <=>				Exchange/demand reaction	1	-1	1000	0			NOTES:
EX_leu_L(e)	L-Leucine exchange	leu_L[e] <=>				Exchange/demand reaction	1	-0.0362216	1000	0			NOTES:
EX_lneldc(e)	linoelaidic acid exchange	lneldc[e] <=>				Exchange/demand reaction	1	-1	1000	0	0		NOTES:
EX_lnlc(e)	linoleic acid (all cis C18:2) exchange	lnlc[e] <=>				Exchange/demand reaction	1	-1	1000	0	0		NOTES:
EX_lnlnca(e)	alpha-Linolenic acid exchange	lnlnca[e] <=>				Exchange/demand reaction	1	-1	1000	0	0		NOTES:
EX_lnlncg(e)	gamma-linolenic acid exchange	lnlncg[e] <=>				Exchange/demand reaction	1	-1	1000	0	0		NOTES:
EX_lpchol_hs(e)	exchange reaction for lysophosphatidylcholine	lpchol_hs[e] ->				Exchange/demand reaction	0	-1000	0	0	0		NOTES:
EX_lys_L(e)	L-Lysine exchange	lys_L[e] <=>				Exchange/demand reaction	1	-0.01	1000	0	0		NOTES:
EX_malt(e)	Maltose exchange	malt[e] ->				Exchange/demand reaction	0	-1000	0	0	0		NOTES:
EX_man(e)	exchange reaction for D-Mannose	man[e] ->				Exchange/demand reaction	0	-1000	0	0	0		NOTES:
EX_meoh(e)	methanol exchange	meoh[e] <=>				Exchange/demand reaction	1	-1	1000	0	0		NOTES:
EX_met_L(e)	L-Methionine exchange	met_L[e] <=>				Exchange/demand reaction	1	-0.01	1000	0	0		NOTES:
EX_mthgxl(e)	Methylglyoxal exchange	mthgxl[e] <=>				Exchange/demand reaction	1	-1	1000	0	0		NOTES:
EX_na1(e)	exchange reaction for Sodium	na1[e] ->				Exchange/demand reaction	0	-1000	0	0	0		NOTES:
EX_nac(e)	Nicotinate exchange	nac[e] <=>				Exchange/demand reaction	1	-1	1000	0	0		NOTES:
EX_nad(e)	Nicotinamide adenine dinucleotide exchange	nad[e] <=>				Exchange/demand reaction	1	-1	1000	0	0		NOTES:
EX_nadp(e)	Nicotinamide adenine dinucleotide phosphate exchange	nadp[e] <=>				Exchange/demand reaction	1	-1	1000	0	0		NOTES:
EX_ncam(e)	Nicotinamide exchange	ncam[e] <=>				Exchange/demand reaction	1	-1	-0.005	0	0		NOTES:
EX_nh4(e)	Ammonia exchange	nh4[e] <=>				Exchange/demand reaction	1	-100	1000	0	0		NOTES:
EX_no(e)	exchange reaction for NO	no[e] <=>				Exchange/demand reaction	1	-1	1000	0	0		NOTES:
EX_nrpphr(e)	Norepinephrine exchange	nrpphr[e] <=>				Exchange/demand reaction	1	-1	1000	0	0		NOTES:
EX_nrpphrsf(e)	Sulfate derivative of norepinephrine exchange	nrpphrsf[e] <=>				Exchange/demand reaction	1	-1	1000	0	0		NOTES:
EX_nrvnc(e)	nervonic acid exchange	nrvnc[e] <=>				Exchange/demand reaction	1	-1	1000	0	0		NOTES:
EX_o2(e)	exchange reaction for oxugen	o2[e] <=>				Exchange/demand reaction	1	-0.3066	1000	0	0		NOTES:
EX_o2s(e)	Superoxide anion exchange	o2s[e] <=>				Exchange/demand reaction	1	-1	1000	0	0		NOTES:
EX_ocdca(e)	echange reaction for octadecanoate (n-C18:0)	ocdca[e] <=>				Exchange/demand reaction	1	-0.1	1000	0	0		NOTES:
EX_ocdcea(e)	octadecenoate (n-C18:1) exchange	ocdcea[e] <=>				Exchange/demand reaction	1	-0.0192	1000	0	0		NOTES:
EX_orn(e)	Ornithine exchange	orn[e] <=>				Exchange/demand reaction	1	-1	1000	0	0		NOTES:
EX_paf_hs(e)	1-alkyl 2-acteylglycerol 3-phosphocholine (homo sapiens) exchange	paf_hs[e] <=>				Exchange/demand reaction	1	-1	1000	0	0		NOTES:
EX_pchol_hs(e)	Phosphatidylcholine (homo sapiens) exchange	pchol_hs[e] <=>				Exchange/demand reaction	1	-1	1000	0	0		NOTES:
EX_pe_hs(e)	exchange reaction for phosphatidylethanolamine	pe_hs[e] ->				Exchange/demand reaction	0	-1000	0	0	0		NOTES:
EX_pglyc_hs(e)	phosphatidylglycerol (homo sapiens) exchange	pglyc_hs[e] <=>				Exchange/demand reaction	1	-1	1000	0	0		NOTES:
EX_phe_L(e)	exchange reaction for L-phenylalanine	phe_L[e] <=>				Exchange/demand reaction	1	-0.01	1000	0	0		NOTES:
EX_pi(e)	Phosphate exchange	pi[e] <=>				Exchange/demand reaction	1	-10	1000	0	0		NOTES:
EX_pnto_R(e)	(R)-Pantothenate exchange	pnto_R[e] <=>				Exchange/demand reaction	1	-0.005	1000	0	0		NOTES:
EX_ppa(e)	Propionate exchange	ppa[e] <=>				Exchange/demand reaction	1	-1	1000	0	0		NOTES:cytosolic conversion of pooled FA into palmitate (so subsequent transport into mit w/ FA oxidation can occur). Since Carbon stoichiometry normalized wrt C16 ratio between Rgroupcoa and pmtcoa is 1:1 HR fatty acid metabolism - R groups = acyl groups, Rtotal, Rtotal2, Rtotal3 correspond to three possible acyl groups added to glycerol R1 - C16 groups R2 - essential FA + associated derivatives …
EX_pro_L(e)	L-Proline exchange	pro_L[e] <=>				Exchange/demand reaction	1	-1	1000	0	0		NOTES:cytosolic conversion of pooled FA into palmitate (so subsequent transport into mit w/ FA oxidation can occur). Since Carbon stoichiometry normalized wrt C16 ratio between Rgroupcoa and pmtcoa is 1:1 HR fatty acid metabolism - R groups = acyl groups, Rtotal, Rtotal2, Rtotal3 correspond to three possible acyl groups added to glycerol R1 - C16 groups R2 - essential FA + associated derivatives …
EX_prostge1(e)	Prostaglandin E1 exchange	prostge1[e] <=>				Exchange/demand reaction	1	-1	1000	0	0		NOTES:cytosolic conversion of pooled FA into palmitate (so subsequent transport into mit w/ FA oxidation can occur). Since Carbon stoichiometry normalized wrt C16 ratio between Rgroupcoa and pmtcoa is 1:1 HR fatty acid metabolism - R groups = acyl groups, Rtotal, Rtotal2, Rtotal3 correspond to three possible acyl groups added to glycerol R1 - C16 groups R2 - essential FA + associated derivatives …
EX_prostge2(e)	Prostaglandin E2 exchange	prostge2[e] <=>				Exchange/demand reaction	1	-1	1000	0	0		NOTES:cytosolic conversion of pooled FA into palmitate (so subsequent transport into mit w/ FA oxidation can occur). Since Carbon stoichiometry normalized wrt C16 ratio between Rgroupcoa and pmtcoa is 1:1 HR fatty acid metabolism - R groups = acyl groups, Rtotal, Rtotal2, Rtotal3 correspond to three possible acyl groups added to glycerol R1 - C16 groups R2 - essential FA + associated derivatives …
EX_prostgf2(e)	Prostaglandin F2alpha exchange	prostgf2[e] <=>				Exchange/demand reaction	1	-1	1000	0	0		NOTES:cytosolic conversion of pooled FA into palmitate (so subsequent transport into mit w/ FA oxidation can occur). Since Carbon stoichiometry normalized wrt C16 ratio between Rgroupcoa and pmtcoa is 1:1 HR fatty acid metabolism - R groups = acyl groups, Rtotal, Rtotal2, Rtotal3 correspond to three possible acyl groups added to glycerol R1 - C16 groups R2 - essential FA + associated derivatives …
EX_ps_hs(e)	phosphatidylserine (homo sapiens) exchange	ps_hs[e] <=>				Exchange/demand reaction	1	-1	1000	0	0		NOTES:cytosolic conversion of pooled FA into palmitate (so subsequent transport into mit w/ FA oxidation can occur). Since Carbon stoichiometry normalized wrt C16 ratio between Rgroupcoa and pmtcoa is 1:1 HR fatty acid metabolism - R groups = acyl groups, Rtotal, Rtotal2, Rtotal3 correspond to three possible acyl groups added to glycerol R1 - C16 groups R2 - essential FA + associated derivatives …
EX_pydam(e)	exchange reaction for Pyridoxamine	pydam[e] ->				Exchange/demand reaction	0	-1000	0	0	4		NOTES:NJ	PMID:8955159
EX_pydx(e)	exchange reaction for Pyridoxal	pydx[e] ->				Exchange/demand reaction	0	-0.005	0	0	2		NOTES:NCD
EX_pydxn(e)	exchange reaction for Pyridoxine	pydxn[e] ->				Exchange/demand reaction	0	-1000	0	0	2		NOTES:NCD	PMID:15705056,PMID:3715892
EX_pyr(e)	Pyruvate exchange	pyr[e] <=>				Exchange/demand reaction	1	-0.0568	1000	0	4		NOTES:NCD	PMID:10471399,PMID:10556483,PMID:10556521,PMID:10631088,PMID:15705056
EX_retfa(e)	fatty acid retinol exchange	retfa[e] <=>				Exchange/demand reaction	1	-1	1000	0	4		NOTES:SAB see Kanai and Hediger 2004 (2003), PMID 14530974	PMID:14530974
EX_retinol(e)	Retinol exchange	retinol[e] <=>				Exchange/demand reaction	1	-100	1000	0	4		NOTES:SAB see Kanai and Hediger 2004 (2003), PMID 14530974	PMID:14530974
EX_retinol_9_cis(e)	9-cis-retinol exchange	retinol_9_cis[e] <=>				Exchange/demand reaction	1	-1	1000	0	4		NOTES:SAB see Kanai and Hediger 2004 (2003), PMID 14530974	PMID:14530974
EX_retinol_cis_11(e)	cis-11-retinol exchange	retinol_cis_11[e] <=>				Exchange/demand reaction	1	-1	1000	0	2		NOTES:PMID: 11984834 (denotes it as potentially mitochondrial) mm	PMID:11984834
EX_retn(e)	Retinoate exchange	retn[e] <=>				Exchange/demand reaction	1	-100	1000	0	4		NOTES:	PMID:2564390,PMID:2886907
EX_ribflv(e)	exchange reaction for Riboflavin	ribflv[e] ->				Exchange/demand reaction	0	-0.005	0	0	4		NOTES:SAB see Kanai and Hediger 2004 (2003), PMID 14530974	PMID:14530974
EX_Rtotal(e)	R total exchange	Rtotal[e] <=>				Exchange/demand reaction	1	-1	1000	0	4		NOTES:SAB	PMID:10747860,PMID:10891391,PMID:10930503,PMID:11325958,PMID:11342143,PMID:11414754
EX_Rtotal2(e)	R total 2 position exchange	Rtotal2[e] <=>				Exchange/demand reaction	1	-1	1000	0	4		NOTES:SAB see Kanai and Hediger 2004 (2003), PMID 14530974	PMID:14530974
EX_Rtotal3(e)	R total 3 position exchange	Rtotal3[e] <=>				Exchange/demand reaction	1	-1	1000	0	2		NOTES:TDV
EX_s2l2fn2m2masn(e)	PA6 exchange	s2l2fn2m2masn[e] <=>				Exchange/demand reaction	1	-1	1000	0	4		NOTES:SAB based om PMID 10823827	PMID:10823827,PMID:12845534
EX_s2l2n2m2masn(e)	de-Fuc form of PA6 exchange	s2l2n2m2masn[e] <=>				Exchange/demand reaction	1	-1	1000	0	1		NOTES:	PMID:10823827,PMID:12845534
EX_ser_L(e)	exchange reaction for L-serine	ser_L[e] <=>				Exchange/demand reaction	1	-0.05	1000	0	1		NOTES:The E. coli enzyme contains a pyruvoyl group.
EX_so4(e)	Sulfate exchange	so4[e] <=>				Exchange/demand reaction	1	-100	1000	0	4		NOTES:	PMID:2565865,PMID:8619816
EX_spc_hs(e)	sphingosylphosphorylcholine (homo sapiens) exchange	spc_hs[e] <=>				Exchange/demand reaction	1	-1	1000	0	4		NOTES:SAB see Kanai and Hediger 2003	PMID:14530974
EX_sph1p(e)	Sphinganine 1-phosphate exchange	sph1p[e] <=>				Exchange/demand reaction	1	-1	1000	0	2		NOTES:MM
EX_sphs1p(e)	Sphingosine 1-phosphate exchange	sphs1p[e] <=>				Exchange/demand reaction	1	-1	1000	0	4		NOTES:TDV	PMID:14598172
EX_strdnc(e)	stearidonic acid exchange	strdnc[e] <=>				Exchange/demand reaction	1	-1	1000	0	4		NOTES:MM	PMID:11279290
EX_tag_hs(e)	triacylglycerol (homo sapiens) exchange	tag_hs[e] <=>				Exchange/demand reaction	1	-1	1000	0	4		NOTES:SAB see Kanai and Hediger 2003	PMID:14530974
EX_taur(e)	Taurine exchange	taur[e] <=>				Exchange/demand reaction	1	-1	1000	0	4		NOTES:	PMID:2225456,PMID:6930651
EX_tchola(e)	Taurocholic acid exchange	tchola[e] <=>				Exchange/demand reaction	1	-1	1000	0	4		NOTES:NCD	PMID:6930651
EX_tcynt(e)	Thiocyanate exchange	tcynt[e] <=>				Exchange/demand reaction	1	-1	1000	0	2		NOTES:NCD
EX_tethex3(e)	tetracosahexaenoic acid, n-3 exchange	tethex3[e] <=>				Exchange/demand reaction	1	-1	1000	0	2		NOTES:NCD
EX_tetpent3(e)	tetracosapentaenoic acid, n-3 exchange	tetpent3[e] <=>				Exchange/demand reaction	1	-1	1000	0	4		NOTES:RS/DK	PMID:10224039,PMID:12628346
EX_thr_L(e)	L-Threonine exchange	thr_L[e] <=>				Exchange/demand reaction	1	-0.01	1000	0	4		NOTES:IT	PMID:8955160,PMID:9676430
EX_thym(e)	Thymine exchange	thym[e] <=>				Exchange/demand reaction	1	-1	1000	0	4		NOTES:IT	PMID:8955160,PMID:9676430
EX_thymd(e)	Thymidine exchange	thymd[e] <=>				Exchange/demand reaction	1	-1	1000	0	4		NOTES:IF TV	PMID:11959398,PMID:12110673,PMID:15528193
EX_trp_L(e)	L-Tryptophan exchange	trp_L[e] <=>				Exchange/demand reaction	1	-0.01	1000	0	4		NOTES:NCD	PMID:14598172
EX_ttdca(e)	exchange reaction for tetradecanoate (n-C14:0)	ttdca[e] <=>				Exchange/demand reaction	1	-0.1	1000	0	2		NOTES:IT
EX_tyr_L(e)	L-Tyrosine exchange	tyr_L[e] <=>				Exchange/demand reaction	1	-0.05	1000	0	1		NOTES:most likely NOT physiological - detailed information about the peroxisomal transporters has not yet been achieved - this transport is most likely dependent on a concomitant energy consuming reaction (human ABC peroxisomal transporters: PEX family - check in future for new research articles describing biochemistry and stoichiometry) NJ
EX_udp(e)	UDP exchange	udp[e] <=>				Exchange/demand reaction	1	-1	1000	0	2		NOTES:IT
EX_ump(e)	UMP exchange	ump[e] <=>				Exchange/demand reaction	1	-1	1000	0	2		NOTES:IT
EX_ura(e)	Uracil exchange	ura[e] <=>				Exchange/demand reaction	1	-1	1000	0	0		NOTES:NCD	PMID:9384606
EX_urate(e)	Urate exchange	urate[e] <=>				Exchange/demand reaction	1	-1	1000	0	4		NOTES:NJ
EX_uri(e)	exchange reaction for Uridine	uri[e] <=>				Exchange/demand reaction	1	-1	1000	0	4		NOTES:NJ
EX_utp(e)	UTP exchange	utp[e] <=>				Exchange/demand reaction	1	-1	1000	0	4		NOTES:NJ
EX_vacc(e)	vaccenic acid exchange	vacc[e] <=>				Exchange/demand reaction	1	-1	1000	0	4		NOTES:NJ
EX_val_L(e)	L-Valine exchange	val_L[e] <=>				Exchange/demand reaction	1	-0.05	1000	0	4		NOTES:NJ
EX_vitd3(e)	exchange reaction for calctriol	vitd3[e] ->				Exchange/demand reaction	0	-1000	0	0	4		NOTES:NJ
EX_xylt(e)	exchange reaction for xylitol	xylt[e] ->				Exchange/demand reaction	0	-1000	0	0	2		NOTES:general reaction - no gene association get NJ
EX_yvite(e)	gamma-Tocopherol exchange	yvite[e] <=>				Exchange/demand reaction	1	-1	1000	0	4		NOTES:NJ	PMID:12855703
FACOAL160i	C160 fatty acid activation	atp[c] + coa[c] + hdca[c] -> amp[c] + ppi[c] + pmtcoa[c]	(2181.2) or (22305.2) or (51703.1) or (22305.1) or (2180.1) or (2181.1)	2180.1 2181.1 2181.2 22305.1 22305.2 51703.1		Fatty acid oxidation	0	0	1000	0	4		NOTES:NJ	PMID:12855703
FACOAL161	fatty-acid--CoA ligase (hexadecenoate)	atp[c] + coa[c] + hdcea[c] -> amp[c] + ppi[c] + hdcoa[c]	-2180.1	2180.1		Fatty acid oxidation	0	0	1000	0	2		NOTES:NJ	PMID:10072769
FACOAL180i	C180 fatty acid activation	atp[c] + coa[c] + ocdca[c] -> amp[c] + ppi[c] + stcoa[c]	(22305.2) or (2181.2) or (51703.1) or (2181.1) or (2180.1) or (22305.1)	2180.1 2181.1 2181.2 22305.1 22305.2 51703.1		Fatty acid oxidation	0	0	1000	0	2		NOTES:NJ	PMID:10072769
FACOAL1812	fatty-acid--CoA ligase	atp[c] + coa[c] + vacc[c] -> amp[c] + ppi[c] + vacccoa[c]	-2180.1	2180.1		Fatty acid oxidation	0	0	1000	0	2		NOTES:NJ	PMID:10072769
FACOAL1813	fatty-acid--CoA ligase	atp[c] + coa[c] + elaid[c] -> amp[c] + ppi[c] + od2coa[c]	-2180.1	2180.1		Fatty acid oxidation	0	0	1000	0	2		NOTES:NJ	PMID:10072769
FACOAL181i	C181 fatty acid activation	atp[c] + coa[c] + ocdcea[c] -> amp[c] + ppi[c] + odecoa[c]	(2180.1) or (2181.2) or (2181.1)	2180.1 2181.1 2181.2		Fatty acid oxidation	0	0	1000	0	2		NOTES:NJ	PMID:10072769
FACOAL1821	fatty-acid--CoA ligase	atp[c] + coa[c] + lnlc[c] -> amp[c] + ppi[c] + lnlccoa[c]	-2180.1	2180.1		Fatty acid oxidation	0	0	1000	0	2		NOTES:NJ	PMID:10072769
FACOAL1822	fatty-acid--CoA ligase	atp[c] + coa[c] + lneldc[c] -> amp[c] + ppi[c] + lneldccoa[c]	-2180.1	2180.1		Fatty acid oxidation	0	0	1000	0	4		NOTES:NJ
FACOAL1831	fatty-acid--CoA ligase	atp[c] + coa[c] + lnlncg[c] -> amp[c] + ppi[c] + lnlncgcoa[c]	-2180.1	2180.1		Fatty acid oxidation	0	0	1000	0	4		NOTES:NJ
FACOAL1832	fatty-acid--CoA ligase	atp[c] + coa[c] + lnlnca[c] -> amp[c] + ppi[c] + lnlncacoa[c]	-2180.1	2180.1		Fatty acid oxidation	0	0	1000	0	4		NOTES:NJ
FACOAL184	fatty-acid--CoA ligase	atp[c] + coa[c] + strdnc[c] -> amp[c] + ppi[c] + strdnccoa[c]	-2180.1	2180.1		Fatty acid oxidation	0	0	1000	0	4		NOTES:NJ
FACOAL200	fatty-acid--CoA ligase	atp[c] + coa[c] + arach[c] -> amp[c] + ppi[c] + arachcoa[c]	-2180.1	2180.1		Fatty acid oxidation	0	0	1000	0	4		NOTES:NJ
FACOAL204	fatty-acid--CoA ligase	atp[c] + coa[c] + arachd[c] -> amp[c] + ppi[c] + arachdcoa[c]	(22305.1) or (2181.2) or (2181.1) or (2180.1) or (22305.2) or (2182.1) or (2182.2)	2180.1 2181.1 2181.2 2182.1 2182.2 22305.1 22305.2		Fatty acid oxidation	0	0	1000	0	4		NOTES:NJ
FACOAL224	fatty-acid--CoA ligase	atp[c] + coa[c] + adrn[c] -> amp[c] + ppi[c] + adrncoa[c]	-2180.1	2180.1		Fatty acid oxidation	0	0	1000	0	4		NOTES:NJ
FACOAL2251	fatty-acid--CoA ligase	atp[c] + coa[c] + dcsptn1[c] -> amp[c] + ppi[c] + dcsptn1coa[c]	-2180.1	2180.1		Fatty acid oxidation	0	0	1000	0	4		NOTES:NJ
FACOAL2252	fatty-acid--CoA ligase	atp[c] + coa[c] + clpnd[c] -> amp[c] + ppi[c] + clpndcoa[c]	-2180.1	2180.1		Fatty acid oxidation	0	0	1000	0	2		NOTES:NJ
FACOAL226	fatty-acid--CoA ligase	atp[c] + coa[c] + crvnc[c] -> amp[c] + ppi[c] + c226coa[c]	-2180.1	2180.1		Fatty acid oxidation	0	0	1000	0	4		NOTES:glycine or taurine as substrates, produces glycocholic or taurocholic acids respectively NJ
FACOAL241	fatty-acid--CoA ligase	atp[c] + coa[c] + nrvnc[c] -> amp[c] + ppi[c] + nrvnccoa[c]	-2180.1	2180.1		Fatty acid oxidation	0	0	1000	0	4		NOTES:glycine or taurine as substrates, produces glycocholic or taurocholic acids respectively NJ
FACOAL245_2	fatty-acid--CoA ligase	atp[c] + coa[c] + tetpent3[c] -> amp[c] + ppi[c] + tetpent3coa[c]	-2180.1	2180.1		Fatty acid oxidation	0	0	1000	0	2		NOTES:third version analog added as per KEGG NJ
FACOAL246_1	fatty-acid--CoA ligase	atp[c] + coa[c] + tethex3[c] -> amp[c] + ppi[c] + tethex3coa[c]	-2180.1	2180.1		Fatty acid oxidation	0	0	1000	0	2		NOTES:fourth version analog added in similarity to BAAT1x, BAAT2x NJ
FADH2tru	FADH2 transporter, endoplasmic reticulum	fadh2[c] -> fadh2[r]				Transport, endoplasmic reticular	0	0	1000	0	4		NOTES:IT	PMID:12459313,PMID:7842009
FADtru	FAD transporter, endoplasmic reticulum	fad[r] -> fad[c]				Transport, endoplasmic reticular	0	0	1000	0	2		NOTES:IT	PMID:12459313,PMID:7842009
FALDH	formaldehyde dehydrogenase	nad[c] + fald[c] + gthrd[c] <=> h[c] + nadh[c] + Sfglutth[c]	-128.1	128.1		Tyrosine metabolism	1	-1000	1000	0	1		NOTES:SAB	PMID:15304357
FALDtly	formaldehyde transport via diffusion (lysosomall)	fald[l] <=> fald[c]				Transport, lysosomal	1	-1000	1000	0	4		NOTES:SAB This reaction represents the ATP driven secretion of glu from the cell. It leaves out the vesicle because a compartment is not available for that. ATP demand is not known for sure stoichiometrically, but 1:1 H coupling ratio is assumed, which could translate to 3 b-ala/ATP.	PMID:12750892,PMID:15383652
FAOXC140	Beta oxidation of long chain fatty acid	6 h2o[m] + 6 coa[m] + 6 nad[m] + 6 fad[m] + tdcoa[m] -> 6 h[m] + 6 nadh[m] + 7 accoa[m] + 6 fadh2[m]	(35.1) or (34.1)	34.1 35.1		Fatty acid oxidation	0	0	1000	0	1		NOTES:SAB	PMID:12586697
FAOXC160	Beta oxidation of long chain fatty acid	7 h2o[m] + 7 coa[m] + 7 nad[m] + 7 fad[m] + pmtcoa[m] -> 7 h[m] + 7 nadh[m] + 8 accoa[m] + 7 fadh2[m]	(34.1) or (35.1)	34.1 35.1		Fatty acid oxidation	0	0	1000	0	1		NOTES:SAB
FAOXC16080m	Beta oxidation of long chain fatty acid	4 h2o[m] + 4 coa[m] + 4 nad[m] + 4 fad[m] + pmtcoa[m] -> 4 h[m] + 4 nadh[m] + 4 accoa[m] + 4 fadh2[m] + occoa[m]	(35.1) or (34.1)	34.1 35.1		Fatty acid oxidation	0	0	1000	0	4		NOTES:MM	PMID:9753662
FAOXC161802m	Beta oxidation fatty acid	4 h2o[m] + 4 coa[m] + 4 nad[m] + 3 fad[m] + hdd2coa[m] -> 4 h[m] + 4 nadh[m] + 4 accoa[m] + 3 fadh2[m] + occoa[m]	(34.1) or (35.1)	34.1 35.1		Fatty acid oxidation	0	0	1000	0	4		NOTES:IT	PMID:10799297,PMID:11401432,PMID:1503811
FAOXC16180m	Beta oxidation fatty acid	4 h2o[m] + 4 coa[m] + 4 nad[m] + 3 fad[m] + hdcoa[m] -> 4 h[m] + 4 nadh[m] + 4 accoa[m] + 3 fadh2[m] + occoa[m]	(35.1) or (34.1)	34.1 35.1		Fatty acid oxidation	0	0	1000	0	1		NOTES:SAB	PMID:6796580
FAOXC1811603m	Beta oxidation fatty acid	5 h2o[m] + 5 coa[m] + 5 nad[m] + 4 fad[m] + odecoa[m] -> 5 h[m] + 5 nadh[m] + 5 accoa[m] + 4 fadh2[m] + occoa[m]	(34.1) or (35.1)	34.1 35.1		Fatty acid oxidation	0	0	1000	0	4		NOTES:IT	PMID:1639787,PMID:8679568
FAOXC204	Beta oxidation of long chain fatty acid	9 h2o[m] + 9 coa[m] + 9 nad[m] + 5 fad[m] + arachdcoa[m] -> 9 h[m] + 9 nadh[m] + 10 accoa[m] + 5 fadh2[m]	(35.1) or (35.1) or (34.1) or (34.1)	34.1 35.1		Fatty acid oxidation	0	0	1000	0	0		NOTES:NCD
FAOXC80	Beta oxidation of med/long chain fatty acid	3 h2o[m] + 3 coa[m] + 3 nad[m] + 3 fad[m] + occoa[m] -> 3 h[m] + 3 nadh[m] + 4 accoa[m] + 3 fadh2[m]	(35.1) or (34.1)	34.1 35.1		Fatty acid oxidation	0	0	1000	0	0		NOTES:NCD
FAS100COA	fatty acyl-CoA synthase (n-C10:0CoA)	3 h[c] + 2 nadph[c] + malcoa[c] + occoa[c] -> h2o[c] + 2 nadp[c] + co2[c] + coa[c] + dcacoa[c]	-2194.1	2194.1		Fatty acid synthesis	0	0	1000	0	2		NOTES:MM	PMID:15321791
FAS120COA	fatty-acyl-CoA synthase (n-C12:0CoA)	3 h[c] + 2 nadph[c] + malcoa[c] + dcacoa[c] -> h2o[c] + 2 nadp[c] + co2[c] + coa[c] + ddcacoa[c]	-2194.1	2194.1		Fatty acid synthesis	0	0	1000	0	2		NOTES:IT, TDV	PMID:1408469,PMID:16380372
FAS140COA	fatty-acyl-CoA synthase (n-C14:0CoA)	3 h[c] + 2 nadph[c] + malcoa[c] + ddcacoa[c] -> h2o[c] + 2 nadp[c] + co2[c] + coa[c] + tdcoa[c]	-2194.1	2194.1		Fatty acid synthesis	0	0	1000	0	4		NOTES:IT, TDV	PMID:3427918
FAS160COA	fatty-acyl-CoA synthase (n-C16:0CoA)	3 h[c] + 2 nadph[c] + malcoa[c] + tdcoa[c] -> h2o[c] + 2 nadp[c] + co2[c] + coa[c] + pmtcoa[c]	-2194.1	2194.1		Fatty acid synthesis	0	0	1000	0	4		NOTES:	PMID:9281325
FAS180COA	fatty-acyl-CoA synthase (n-C18:0CoA)	3 h[c] + 2 nadph[c] + malcoa[c] + pmtcoa[c] -> h2o[c] + 2 nadp[c] + co2[c] + coa[c] + stcoa[c]	-2194.1	2194.1		Fatty acid synthesis	0	0	1000	0	4	6.2.1.3	NOTES:NJ	PMID:10358072,PMID:12507753,PMID:9334206
FAS80COA_L	fatty acyl-CoA synthase (n-C8:0CoA), lumped reaction	9 h[c] + 6 nadph[c] + accoa[c] + 3 malcoa[c] -> 3 h2o[c] + 6 nadp[c] + 3 co2[c] + 3 coa[c] + occoa[c]	-2194.1	2194.1		Fatty acid synthesis	0	0	1000	0	2		NOTES:NJ
FATP1t	fatty acid electroneutral transport	na1[c] + hdca[c] <=> na1[e] + hdca[e]	(376497.2) or (10999.1) or (376497.1) or (11000.1)	10999.1 11000.1 376497.1 376497.2		Transport, extracellular	1	-1000	1000	0	2	6.2.1.3	NOTES:unknown mechanism, however glucuronidated metabolites need to get out of the cell NJ
FATP2t	fatty acid electroneutral transport	na1[c] + ocdcea[c] <=> na1[e] + ocdcea[e]	(376497.1) or (376497.2)	376497.1 376497.2		Transport, extracellular	1	-1000	1000	0	4	6.2.1.3	NOTES:NJ	PMID:10358072,PMID:12507753,PMID:9334206
FATP3t	fatty acid electroneutral transport	na1[c] + ocdca[c] <=> na1[e] + ocdca[e]	(376497.1) or (376497.2)	376497.1 376497.2		Transport, extracellular	1	-1000	1000	0	2	6.2.1.3	NOTES:NJ
FBA	fructose-bisphosphate aldolase	fdp[c] <=> dhap[c] + g3p[c]	(226.2) or (226.1) or (226.3) or (230.1) or (229.1)	226.1 226.2 226.3 229.1 230.1		Glycolysis/gluconeogenesis	1	-1000	1000	0	2	6.2.1.3	NOTES:unknown mechanism, however glucuronidated metabolites need to get out of the cell NJ
FBP	fructose-bisphosphatase	h2o[c] + fdp[c] -> pi[c] + f6p[c]	(2203.1) or (8789.1)	2203.1 8789.1		Glycolysis/gluconeogenesis	0	0	1000	0	0	6.2.1.3	NOTES:TDV	PMID:12456881,PMID:7656592,PMID:8117274
FBP26	Fructose-2,6-bisphosphate 2-phosphatase	h2o[c] + f26bp[c] -> pi[c] + f6p[c]	(2203.1) or (5210.1) or (5207.1) or (5209.1) or (5208.1) or (8789.1)	2203.1 5207.1 5208.1 5209.1 5210.1 8789.1		Fructose and mannose metabolism	0	0	1000	0	4	6.2.1.3	NOTES:NJ	PMID:10358072,PMID:12507753,PMID:9334206
FMNAT	FMN adenylyltransferase	atp[c] + h[c] + fmn[c] -> ppi[c] + fad[c]	(80308.1) or (80308.2)	80308.1 80308.2		Vitamin B2 metabolism	0	0	1000	0	2	6.2.1.3	NOTES:cholesterol precursor, transport by &quot;diffusion&quot; -&gt; actually beleived to be flip-flop mechanism (PMID: 12840657). NJ
FOLR2	folate reductase	nadph[c] + fol[c] -> nadp[c] + dhf[c]	-1719.1	1719.1		Folate metabolism	0	0	1000	0	2	6.2.1.3	NOTES:IT	PMID:16011464,PMID:5867120,PMID:7758201,PMID:8593541
FRDPtc	lipid, flip-flop intracellular transport	frdp[x] <=> frdp[c]				Transport, peroxisomal	1	-1000	1000	0	4	6.2.1.3	NOTES:NCD	PMID:8861954
FRDPtr	lipid, flip-flop intracellular transport	frdp[x] <=> frdp[r]				Transport, peroxisomal	1	-1000	1000	0	4	6.2.1.3	NOTES:NCD	PMID:8861954
FT	farnesyltranstransferase (trans,trans,cis-geranylgeranyl diphosphate-generating)	ipdp[c] + frdp[c] -> ppi[c] + ttc_ggdp[c]				N-glycan synthesis	0	0	1000	0	4	6.2.1.3	NOTES:	PMID:10224133
FTHFL	Formate-tetrahydrofolate ligase	atp[c] + 3 h[c] + thf[c] + for[c] -> 10fthf[c] + adp[c] + pi[c]	(4522.1) or (286297.1)	286297.1 4522.1		Folate metabolism	0	0	1000	0	4	6.2.1.3	NOTES:	PMID:10224133
FUCASE2e	alpha-fucosidase, extracellular	h2o[e] + ksi[e] -> fuc_L[e] + ksi_deg1[e]	-2519.1	2519.1		Keratan sulfate degradation	0	0	1000	0	4	6.2.1.3	NOTES:IT	PMID:12459313,PMID:15059618
FUCASEe	alpha-fucosidase, extracellular	h2o[e] + s2l2fn2m2masn[e] -> fuc_L[e] + s2l2n2m2masn[e]	-2519.1	2519.1		N-glycan degradation	0	0	1000	0	4	6.2.1.3	NOTES:IT	PMID:16011464,PMID:5867120,PMID:7758201,PMID:8593541
FUM	fumarase	h2o[c] + fum[c] <=> mal_L[c]	-2271.1	2271.1		Citric acid cycle	1	-1000	1000	0	4	6.2.1.3	NOTES:Also acts on biotin esters IT	PMID:12459313,PMID:7509806,PMID:8001986
FUMm	fumarase, mitochondrial	h2o[m] + fum[m] <=> mal_L[m]	-2271.1	2271.1		Citric acid cycle	1	-1000	1000	0	4	6.2.1.3	NOTES:Also acts on biotin esters IT	PMID:12459313,PMID:15059618
G12MT1_L	Glycolipid 1,2-alpha-D-mannosyltransferase (liver)	gdpmann[c] + 0.1 m2mpdol_L[c] -> h[c] + gdp[c] + 0.1 m3mpdol_L[c]				N-glycan synthesis	0	0	1000	0	4	6.2.1.3	NOTES:IT for human biotin metabolism
G12MT2_L	Glycolipid 1,2-alpha-D-mannosyltransferase (liver)	gdpmann[c] + 0.1 m3mpdol_L[c] -> h[c] + gdp[c] + 0.1 m4mpdol_L[c]				N-glycan synthesis	0	0	1000	0	4	6.2.1.3	NOTES:IT for human biotin metabolism
G13MT_L	Glycolipid 1,3-alpha-D-mannosyltransferase (liver)	gdpmann[c] + 0.1 mpdol_L[c] -> h[c] + gdp[c] + 0.1 m1mpdol_L[c]	(85365.1) or (85365.2)	85365.1 85365.2		N-glycan synthesis	0	0	1000	0	4		NOTES:NCD	PMID:10510291,PMID:12739169,PMID:7835905,PMID:8476015,PMID:9508842,PMID:9649795,PMID:9824713
G14T2g	beta-N-acetylglucosaminylglycopeptide beta-1,4-galactosyltransferase, Golgi	udpgal[g] + ksii_core2_pre1[g] -> h[g] + udp[g] + ksii_core2_pre2[g]	(8703.1) or (2683.1) or (8704.2) or (8704.1) or (9334.1)	2683.1 8703.1 8704.1 8704.2 9334.1		Keratan sulfate synthesis	0	0	1000	0	4		NOTES:NCD	PMID:12949353,PMID:15121743,PMID:16011464
G14T3g	beta-N-acetylglucosaminylglycopeptide beta-1,4-galactosyltransferase, Golgi	udpgal[g] + ksii_core2_pre3[g] -> h[g] + udp[g] + ksii_core2_pre4[g]	(8703.1) or (2683.1) or (8704.2) or (8704.1) or (9334.1)	2683.1 8703.1 8704.1 8704.2 9334.1		Keratan sulfate synthesis	0	0	1000	0	4	1.2.1.1	NOTES:_01-25-05 based on Wang et al., 1999, JBC, 274(21), 14875-14888. IT 03-07-05:replaced IT: now based on Balamurugan et al, 2005, Am J Physiol Renal Physiol, 288, F823-831,2005	PMID:10329687,PMID:10334869,PMID:12646417,PMID:15561972,PMID:9516450
G14T4g	beta-N-acetylglucosaminylglycopeptide beta-1,4-galactosyltransferase, Golgi	udpgal[g] + ksii_core2_pre6[g] -> h[g] + udp[g] + ksii_core2_pre7[g]	(8703.1) or (2683.1) or (8704.2) or (8704.1) or (9334.1)	2683.1 8703.1 8704.1 8704.2 9334.1		Keratan sulfate synthesis	0	0	1000	0	4		NOTES:IT	PMID:14770311,PMID:15623830
G14T5g	beta-N-acetylglucosaminylglycopeptide beta-1,4-galactosyltransferase, Golgi	udpgal[g] + ksii_core2_pre9[g] -> h[g] + udp[g] + ksii_core2_pre10[g]	(9334.1) or (2683.1) or (8704.2) or (8704.1) or (8703.1)	2683.1 8703.1 8704.1 8704.2 9334.1		Keratan sulfate synthesis	0	0	1000	0	2	1.3.99.3	NOTES:IT	PMID:16011464,PMID:5867120,PMID:7758201,PMID:8593541
G16MT_L	Glycolipid 1,6-alpha-D-mannosyltransferase (liver)	gdpmann[c] + 0.1 m1mpdol_L[c] -> h[c] + gdp[c] + 0.1 m2mpdol_L[c]				N-glycan synthesis	0	0	1000	0	4	1.3.99.3	NOTES:MM	PMID:11508704,PMID:5773299
G5SADrm	L-glutamate 5-semialdehyde dehydratase, reversible, mitochondrial	glu5sa[m] <=> h[m] + h2o[m] + 1pyr5c[m]				Arginine and Proline Metabolism	1	-1000	1000	0	0	4.2.1.74	NOTES:NCD
G5SADs	L-glutamate 5-semialdehyde dehydratase (spontaneous)	glu5sa[c] -> h2o[c] + h[c] + 1pyr5c[c]				Urea cycle	0	0	1000	0	4	4.2.1.74	NOTES:JLR	PMID:10510291,PMID:11827462,PMID:12739169,PMID:7835905,PMID:8476015,PMID:9508842,PMID:9649795,PMID:9824713
G5SDym	glutamate-5-semialdehyde dehydrogenase (m)	h[m] + nadph[m] + glu5p[m] -> nadp[m] + pi[m] + glu5sa[m]	-5832.1	5832.1		Urea cycle	0	0	1000	0	2	4.2.1.74	NOTES:IT
G6PDA	glucosamine-6-phosphate deaminase	h2o[c] + gam6p[c] -> nh4[c] + f6p[c]	(132789.1) or (10007.1)	10007.1 132789.1		Aminosugar metabolism	0	0	1000	0	1	4.2.1.74	NOTES:NJ
G6PDH1rer	glucose-6-phosphate dehydrogenase, endoplasmic reticulum	nad[r] + g6p[r] <=> h[r] + nadh[r] + 6pgl[r]	-9563.1	9563.1		Pentose phosphate pathway	1	0	1.70529	0	1	1.3.99.3	NOTES:diffusion NJ
G6PDH2r	glucose 6-phosphate dehydrogenase	nadp[c] + g6p[c] <=> h[c] + nadph[c] + 6pgl[c]	-2539.1	2539.1		Pentose phosphate pathway	1	-1000	1000	0	4	1.3.99.3	NOTES:NCD ER version NJ	PMID:16784888
G6PDH2rer	glucose 6-phosphate dehydrogenase, endoplasmic reticulum	nadp[r] + g6p[r] <=> h[r] + nadph[r] + 6pgl[r]	-9563.1	9563.1		Pentose phosphate pathway	1	-1000	1000	0	4	2.3.1.86	NOTES:	PMID:1988962
G6PPer	glucose-6-phosphate phosphatase, edoplasmic reticular	h2o[r] + g6p[r] -> glc_D[r] + pi[r]	(57818.1) or (2538.1) or (92579.1)	2538.1 57818.1 92579.1		Glycolysis/gluconeogenesis	0	0	1000	0	4	2.3.1.86	NOTES:TV	PMID:1528846,PMID:1988962
GALASE16ly	beta-galactosidase, lysosomal	2 h2o[l] + ksii_core2_deg2[l] -> 2 gal[l] + ksii_core2_deg3[l]	(5476.1) and (2720.1) and (2588.1) and (4758.1) or (5476.1) and (2720.1)	2588.1 2720.1 4758.1 5476.1		Keratan sulfate degradation	0	0	1000	0	4	2.3.1.86	NOTES:TV	PMID:14598172
GALASE17ly	beta-galactosidase, lysosomal	h2o[l] + ksii_core2_deg5[l] -> gal[l] + ksii_core2_deg6[l]	(5476.1) and (2720.1) and (2588.1) and (4758.1) or (5476.1) and (2720.1)	2588.1 2720.1 4758.1 5476.1		Keratan sulfate degradation	0	0	1000	0	4	2.3.1.86	NOTES:TDV
GALASE18ly	beta-galactosidase, lysosomal	h2o[l] + ksii_core2_deg8[l] -> gal[l] + ksii_core2_deg9[l]	(5476.1) and (2720.1) and (2588.1) and (4758.1) or (5476.1) and (2720.1)	2588.1 2720.1 4758.1 5476.1		Keratan sulfate degradation	0	0	1000	0	4	2.3.1.86	NOTES:NJ
GALASE19ly	beta-galactosidase, lysosomal	h2o[l] + f1a[l] -> gal[l] + core6[l]	(5476.1) and (2720.1) and (2588.1) and (4758.1) or (5476.1) and (2720.1)	2588.1 2720.1 4758.1 5476.1		Keratan sulfate degradation	0	0	1000	0	4	2.3.1.86	NOTES:TDV
GALASE1ly	beta-galactosidase, lysosomal	2 h2o[l] + l2n2m2mn[l] -> n2m2mn[l] + 2 gal[l]	(5476.1) and (2720.1) and (2588.1) and (4758.1) or (5476.1) and (2720.1)	2588.1 2720.1 4758.1 5476.1		N-glycan degradation	0	0	1000	0	4		NOTES:NJ
GALASE20ly	beta-galactosidase, lysosomal	2 h2o[l] + ksii_core4_deg2[l] -> 2 gal[l] + ksii_core4_deg3[l]	(5476.1) and (2720.1) and (2588.1) and (4758.1) or (5476.1) and (2720.1)	2588.1 2720.1 4758.1 5476.1		Keratan sulfate degradation	0	0	1000	0	4		NOTES:NJ
GALK	galactokinase	atp[c] + 2 h[c] + gal[c] -> adp[c] + gal1p[c]	(2584.1) or (2585.2) or (2585.1)	2584.1 2585.1 2585.2		Galactose metabolism	0	0	1000	0	4		NOTES:TDV
GALNTg	GalNAc transferase, Golgi apparatus	udpacgal[g] + Ser_Thr[g] -> h[g] + udp[g] + Tn_antigen[g]	(26290.1) or (79695.1) or (2589.1) or (50614.1) or (8693.1) or (55568.2) or (114805.1) or (11226.1) or (117248.1) or (11227.1) or (55568.1) or (2590.1) or (51809.1) or (26290.1) or (79623.1) or (63917.1) or (2591.1)	11226.1 11227.1 114805.1 117248.1 2589.1 2590.1 2591.1 26290.1 50614.1 51809.1 55568.1 55568.2 63917.1 79623.1 79695.1 8693.1		O-glycan synthesis	0	0	1000	0	4	4.1.2.13	NOTES:TV (see C160CRN)	PMID:1988962
GALSIDEtl	galactocerebroside intracellular transport	galside_hs[c] <=> galside_hs[l]				Transport, lysosomal	1	-1000	1000	0	4	3.1.3.11	NOTES:TV	PMID:1528846,PMID:1988962
GALT	galactose-1-phosphate uridylyltransferase	h[c] + utp[c] + gal1p[c] <=> udpgal[c] + ppi[c]	(2592.1) or (2592.3) or (2592.2)	2592.1 2592.2 2592.3		Galactose metabolism	1	-1000	1000	0	4	3.1.3.46	NOTES:TV	PMID:14598172
GALt1r	galactose transport (uniport)	gal[e] <=> gal[c]	(29988.1) or (6513.1) or (6515.1) or (6514.1) or (81031.1)	29988.1 6513.1 6514.1 6515.1 81031.1		Transport, extracellular	1	-1000	1000	0	4	2.7.7.2	NOTES:TDV	PMID:1988962
GALtly	galactose efflux from lysosome	gal[l] -> gal[c]				Transport, lysosomal	0	0	1000	0	4		NOTES:TDV	PMID:1528846,PMID:1988962
GALU	UTP-glucose-1-phosphate uridylyltransferase	h[c] + g1p[c] + utp[c] <=> ppi[c] + udpg[c]	(7360.1) or (7359.1) or (7360.2)	7359.1 7360.1 7360.2		Galactose metabolism	1	-1000	1000	0	4		NOTES:TDV	PMID:14598172
GAMt1r	glucosamine transport (uniport)	gam[e] <=> gam[c]	(6513.1) or (6517.1) or (6514.1)	6513.1 6514.1 6517.1		Transport, extracellular	1	-1000	1000	0	4		NOTES:TDV	PMID:1988962
GAPD	glyceraldehyde-3-phosphate dehydrogenase	pi[c] + nad[c] + g3p[c] <=> h[c] + nadh[c] + 13dpg[c]	(2597.1) or (26330.1)	2597.1 26330.1		Glycolysis/gluconeogenesis	1	-1000	1000	0	4		NOTES:TDV C20:4 transport	PMID:1528846,PMID:1988962
GASNASEly	glycosylasparaginase, lysosomal	h2o[l] + s2l2n2m2masn[l] -> Asn_X_Ser_Thr[l] + s2l2n2m2m[l]	-175.1	175.1		N-glycan degradation	0	0	1000	0	4		NOTES:TDV C20:4 transport	PMID:14598172
GCHOLAte	bile acid intracellular transport	gchola[e] <=> gchola[c]				Transport, extracellular	1	-1000	1000	0	2	3.2.1.51	NOTES:interaction between peroxisomes and ER (some enzymes on the outer membrane) NJ
GGT_L	geranylgeranyltransferase (liver)	17.6 ipdp[c] + ttc_ggdp[c] -> 17.6 ppi[c] + 0.1 dedoldp_L[c]				N-glycan synthesis	0	0	1000	0	4	3.2.1.51	NOTES:TDV	PMID:1988962
GGT6	Gamma-glutamyltransferase	glu_L[c] + leuktrE4[c] <=> h2o[c] + leuktrF4[c]				Eicosanoid metabolism	1	-1000	1000	0	4	4.2.1.2	NOTES:TDV	PMID:11274214,PMID:1528846,PMID:1988962
GHMT2r	glycine hydroxymethyltransferase, reversible	thf[c] + ser_L[c] <=> h2o[c] + gly[c] + mlthf[c]	(6470.1) or (6470.2)	6470.1 6470.2		Glycine, serine, alanine and threonine metabolism	1	-1000	1000	0	4	4.2.1.2	NOTES:TDV	PMID:14598172
GK1	guanylate kinase (GMP:ATP)	atp[c] + 3 h[c] + gmp[c] <=> adp[c] + gdp[c]	-2987.1	2987.1		Nucleotide interconversion	1	-1000	1000	0	1	2.4.1.131	NOTES:SAB
GLACter	D-glucurono-6,3-lactone transport, endoplasmic reticulum	glac[c] <=> glac[r]				Transport, endoplasmic reticular	1	-1000	1000	0	1	2.4.1.131	NOTES:SAB
GLAl	galactosidase, alpha	h2o[l] + digalside_hs[l] -> galside_hs[l] + gal[l]	-2717.1	2717.1		Sphingolipid metabolism	0	0	1000	0	4	2.4.1.132	NOTES:NCD ER version NJ	PMID:10710235,PMID:14506130
GLCAASE1ly	beta-glucuronidase, lysosomal	h2o[l] + hs_deg9[l] -> glcur[l] + hs_deg10[l]	-2990.1	2990.1		Heparan sulfate degradation	0	0	1000	0	4	2.4.1.38	NOTES:NCD ER version NJ	PMID:12829805
GLCAASE5ly	beta-glucuronidase, lysosomal	h2o[l] + cs_c_deg2[l] -> glcur[l] + cs_c_deg3[l]	-2990.1	2990.1		Chondroitin sulfate degradation	0	0	1000	0	4	2.4.1.38	NOTES:NCD ER - NJ	PMID:12829805
GLCAASE6ly	beta-glucuronidase, lysosomal	h2o[l] + cs_d_deg3[l] -> glcur[l] + cs_d_deg4[l]	-2990.1	2990.1		Chondroitin sulfate degradation	0	0	1000	0	4	2.4.1.38	NOTES:EC 1.-.-.- NCD ER version NJ
GLCAASE7ly	beta-glucuronidase, lysosomal	h2o[l] + cs_e_deg3[l] -> glcur[l] + cs_e_deg4[l]	-2990.1	2990.1		Chondroitin sulfate degradation	0	0	1000	0	4	2.4.1.38	NOTES:double check rxn specifics - see lit ref: Marijanovic, Molecular Endocrinology 2003 17:1715-1725 ER version NJ
GLCAASE8ly	beta-glucuronidase, lysosomal	h2o[l] + ha[l] -> glcur[l] + ha_deg1[l]	-2990.1	2990.1		Hyaluronan metabolism	0	0	1000	0	4		NOTES:double check rxn specifics - see lit ref: Marijanovic, Molecular Endocrinology 2003 17:1715-1725 ER version NJ
GLCAASE9ly	beta-glucuronidase, lysosomal	2 h2o[l] + ha_pre1[l] -> acgam[l] + glcur[l]	-2990.1	2990.1		Hyaluronan metabolism	0	0	1000	0	4		NOTES:plasma membrane version (SR and ER versions also exist) stoichiometry actually varies (number of Ca/ATP transported). See PMID: 7876199 NJ	PMID:7876199,PMID:8396145
GLCMter	glucose transport via membrane vesicle	glc_D[r] -> glc_D[e]				Transport, extracellular	0	0	1000	0	4		NOTES:IT	PMID:11447229,PMID:12637526,PMID:12835412,PMID:14507663,PMID:15631998
GLCNACASE1ly	alpha-N-acetylglucosaminidase, lysosomal	h2o[l] + hs_deg3[l] -> acgam[l] + hs_deg4[l]	-4669.1	4669.1		Heparan sulfate degradation	0	0	1000	0	2	1.2.1.41	NOTES:IT	PMID:1503811
GLCNACASE2ly	alpha-N-acetylglucosaminidase, lysosomal	h2o[l] + hs_deg8[l] -> acgam[l] + hs_deg9[l]	-4669.1	4669.1		Heparan sulfate degradation	0	0	1000	0	1	3.5.99.6	NOTES:unknown mechanism, xenobiotic transport (original and metabolized) NJ
GLCNACASE3ly	alpha-N-acetylglucosaminidase, lysosomal	h2o[l] + hs_deg14[l] -> acgam[l] + hs_deg15[l]	-4669.1	4669.1		Heparan sulfate degradation	0	0	1000	0	2	1.1.1.47	NOTES:NCD	PMID:19382904,PMID:19382905,PMID:8769411
GLCNACASE4ly	alpha-N-acetylglucosaminidase, lysosomal	h2o[l] + hs_deg20[l] -> acgam[l] + hs_deg21[l]	-4669.1	4669.1		Heparan sulfate degradation	0	0	1000	0	4	1.1.1.49	NOTES:MM	PMID:12406570,PMID:2484986
GLCNACASE5ly	alpha-N-acetylglucosaminidase, lysosomal	h2o[l] + hs_deg24[l] -> acgam[l] + hs_deg25[l]	-4669.1	4669.1		Heparan sulfate degradation	0	0	1000	0	4	1.1.1.47	NOTES:TV	PMID:1657986,PMID:3755525
GLCNACPT_L	UDP-GlcNAc:dolichol-phosphate GlcNAc phosphotransferase (liver)	0.1 dolp_L[c] + uacgam[c] -> 0.1 naglc2p_L[c] + ump[c]	(1798.1) or (1798.2)	1798.1 1798.2		N-glycan synthesis	0	0	1000	0	0	3.1.3.9	NOTES:NCD	PMID:18634816,PMID:18634817
GLCNACT_L	UDP-GlcNAc:N-acetyl-D-glucosaminyl diphosphodolichol N-acetyl-D-glucosaminyltransferase (liver)	uacgam[c] + 0.1 naglc2p_L[c] -> h[c] + udp[c] + 0.1 chito2pdol_L[c]				N-glycan synthesis	0	0	1000	0	2	3.2.1.23	NOTES:IT	PMID:14633777
GLCt1r	glucose transport (uniport)	glc_D[e] <=> glc_D[c]	(66035.1) or (6517.1) or (56606.1) or (154091.1) or (6513.1) or (11182.1) or (29988.1) or (6514.1) or (155184.1) or (56606.2) or (144195.1) or (6515.1) or (81031.1)	11182.1 144195.1 154091.1 155184.1 29988.1 56606.1 56606.2 6513.1 6514.1 6515.1 6517.1 66035.1 81031.1		Transport, extracellular	1	-1000	1000	0	2	3.2.1.23	NOTES:IT	PMID:12438653,PMID:14633777,PMID:6313022
GLCter	glucose transport, endoplasmic reticulum	glc_D[c] <=> glc_D[r]				Transport, endoplasmic reticular	1	-1000	1000	0	4	3.2.1.23	NOTES:JLR (EC 2.5.1.17) IT	PMID:12438653,PMID:14633777,PMID:6313022
GLCURter	glucuronate endoplasmic reticular transport	glcur[c] -> glcur[r]				Transport, endoplasmic reticular	0	0	1000	0	2	3.2.1.18	NOTES:See PMID: 11946414 NCD	PMID:11946414,PMID:8384451
GLCURtly	glucuronate transport into lysososme	h[c] + glcur[c] <=> h[l] + glcur[l]	-26503.1	26503.1		Transport, lysosomal	1	-1000	1000	0	4	3.2.1.23	NOTES:
GLNLASEer	gluconolactonase, endoplasmic reticulum	h[r] + guln[r] <=> h2o[r] + gullac[r]				Vitamin C metabolism	1	-1000	1000	0	4	3.2.1.23	NOTES:MM	PMID:10347186,PMID:12853138
GLNS	glutamine synthetase	nh4[c] + atp[c] + 2 h[c] + glu_L[c] -> adp[c] + pi[c] + gln_L[c]	(2752.1) or (51557.1)	2752.1 51557.1		Glutamate metabolism	0	0	1000	0	2	2.7.1.6	NOTES:NCD	PMID:12192101,PMID:8384451
GLNt4	L-glutamine reversible transport via sodium symport	na1[e] + gln_L[e] -> na1[c] + gln_L[c]	(81539.1) or (11254.1) or (54407.1) or (55089.1)	11254.1 54407.1 55089.1 81539.1		Transport, extracellular	0	0	1000	0	4	2.4.1.41	NOTES:multiple EC EC 1.1.1.189 EC 1.1.1.197 NJ	PMID:8740524,PMID:9740676
GLNtm	L-glutamine transport via electroneutral transporter	gln_L[c] -> gln_L[m]				Transport, mitochondrial	0	0	1000	0	4		NOTES:multiple EC EC 1.1.1.189 EC 1.1.1.197 NJ	PMID:8740524,PMID:9740676
GLNtN1	Glutamine transport (Na, H coupled)	h[c] + 2 na1[e] + gln_L[e] <=> h[e] + 2 na1[c] + gln_L[c]	(92745.1) or (10991.1)	10991.1 92745.1		Transport, extracellular	1	-1000	1000	0	2	2.7.7.12	NOTES:
GLRASE	glucuronolactone reductase	nadp[c] + gullac[c] <=> h[c] + nadph[c] + glac[c]				Vitamin C metabolism	1	-1000	1000	0	2		NOTES:
GLU5Km	glutamate 5-kinase (m)	glu_L[m] + atp[m] -> h[m] + adp[m] + glu5p[m]	-5832.1	5832.1		Urea cycle	0	0	1000	0	4		NOTES:NJ - reversibility of enzyme found in lit by NCD	PMID:2425833
GLUDxm	glutamate dehydrogenase (NAD) (mitochondrial)	h2o[m] + nad[m] + glu_L[m] <=> h[m] + akg[m] + nadh[m] + nh4[m]	(2747.1) or (2746.1)	2746.1 2747.1		Glutamate metabolism	1	-1000	4.4962	0	1	2.7.7.9	NOTES:unknown mechanism, presumed diffusion NJ
GLUDym	glutamate dehydrogenase (NADP), mitochondrial	h2o[m] + nadp[m] + glu_L[m] <=> h[m] + nadph[m] + akg[m] + nh4[m]	(2747.1) or (2746.1)	2746.1 2747.1		Glutamate metabolism	1	-1000	4.4962	0	4		NOTES:ER membrane - but on cytosolic surface NJ
GLUNm	glutaminase (mitochondrial)	h2o[m] + gln_L[m] -> glu_L[m] + nh4[m]	(2744.1) or (27165.2) or (27165.1)	27165.1 27165.2 2744.1		Glutamate metabolism	0	0	10.48	0	4	1.2.1.12	NOTES:inner mitochondrial membrane NJ
GLUt2m	L-glutamate reversible transport via proton symport, mitochondrial	h[c] + glu_L[c] <=> h[m] + glu_L[m]	(83733.1) or (8604.1) or (79751.1) or (10165.1)	10165.1 79751.1 83733.1 8604.1		Transport, mitochondrial	1	-1000	1000	0	4	3.5.1.26	NOTES:NJ
GLUTCOADHm	glutaryl-CoA dehydrogenase (mitochondria)	h[m] + glutcoa[m] + fad[m] -> co2[m] + b2coa[m] + fadh2[m]	(2639.1) or (2639.2)	2639.1 2639.2		Tryptophan metabolism	0	0	1000	0	4		NOTES:NJ
GLYC3Ptm	glycerol-3-phosphate shuttle	glyc3p[c] -> glyc3p[m]				Transport, mitochondrial	0	0	1000	0	4		NOTES:NJ	PMID:11956206
GLYCK2	glycerate kinase	atp[c] + 2 h[c] + glyc_R[c] -> adp[c] + 2pg[c]				Glyoxylate and dicarboxylate metabolism	0	0	1000	0	2	2.3.2.2	NOTES:non-vesicular intracellular transport of ceramide	PMID:12803919,PMID:14685229,PMID:15596449,PMID:15907394
GLYCt	glycerol transport via channel	glyc[c] <=> glyc[e]				Transport, extracellular	1	-1000	1000	0	2	2.1.2.1	NOTES:non-vesicular intracellular transport of ceramide	PMID:12803919,PMID:14685229,PMID:15596449,PMID:15907394
GLYCtm	glycerol transport	glyc[c] <=> glyc[m]				Transport, mitochondrial	1	-1000	1000	0	2		NOTES:non-vesicular intracellular transport of glucocerebroside	PMID:12803919,PMID:14685229,PMID:15596449,PMID:15907394
GLYOX	hydroxyacylglutathione hydrolase	h2o[c] + lgt_S[c] -> h[c] + gthrd[c] + lac_D[c]	(3029.1) or (84264.2) or (84264.1)	3029.1 84264.1 84264.2		Pyruvate metabolism	0	0	1000	0	2		NOTES:non-vesicular intracellular transport of glucocerebroside	PMID:12803919,PMID:14685229,PMID:15596449,PMID:15907394
GLYt4	glycine transport via sodium symport	na1[e] + gly[e] -> na1[c] + gly[c]	(81539.1) or (11254.1) or (54407.1) or (55089.1)	11254.1 54407.1 55089.1 81539.1		Transport, extracellular	0	0	1000	0	2	3.2.1.22	NOTES:SAB	PMID:12905028
GMPR	GMP reductase	2 h[c] + nadph[c] + gmp[c] -> nh4[c] + nadp[c] + imp[c]	(2766.1) or (51292.1) or (51292.3) or (51292.2)	2766.1 51292.1 51292.2 51292.3		Nucleotide interconversion	0	0	1000	0	4	3.2.1.31	NOTES:IT	PMID:11447229,PMID:12637526,PMID:12835412,PMID:14507663,PMID:15631998
GMPS2	GMP synthase	h2o[c] + atp[c] + gln_L[c] + xmp[c] -> 2 h[c] + glu_L[c] + amp[c] + ppi[c] + gmp[c]	-8833.1	8833.1		Nucleotide interconversion	0	0	1000	0	4	3.2.1.31	NOTES:NJ
GND	phosphogluconate dehydrogenase	nadp[c] + 6pgc[c] -> nadph[c] + co2[c] + ru5p_D[c]	-5226.1	5226.1		Pentose phosphate pathway	0	0	1.12797	0	4	3.2.1.31	NOTES:rev by uniprot NJ	PMID:10861222
GNDer	phosphogluconate dehydrogenase, endoplasmic reticulum	nadp[r] + 6pgc[r] -> nadph[r] + co2[r] + ru5p_D[r]				Pentose phosphate pathway	0	0	1.12797	0	4	3.2.1.31	NOTES:NJ	PMID:10861222
GPDDA1	Glycerophosphodiester phosphodiesterase (Glycerophosphocholine)	h2o[c] + g3pc[c] -> h[c] + chol[c] + glyc3p[c]				Glycerophospholipid metabolism	0	0	1	0	0	3.2.1.31	NOTES:no high energy phosphate compounds found associated w/ rxn NJ	PMID:15175005
GRTTx	geranyltranstransferase	ipdp[x] + grdp[x] -> ppi[x] + frdp[x]	-2224.1	2224.1		Cholesterol metabolism	0	0	1000	0	4	3.2.1.31	NOTES:NCD
GSNt	guanosine facilated transport in cytosol	gsn[e] <=> gsn[c]	(3177.1) or (2030.1)	2030.1 3177.1		Transport, extracellular	1	-1000	1000	0	2		NOTES:	PMID:10984
GTHDH	Glutathione dehydrogenase (dehydroascorbate reductase)	dhdascb[c] + 2 gthrd[c] -> h[c] + ascb_L[c] + gthox[c]				Vitamin C metabolism	0	0	1000	0	4	3.2.1.50	NOTES:NJ	PMID:12507753,PMID:9007731,PMID:9334206
GTHO	glutathione oxidoreductase	h[c] + nadph[c] + gthox[c] -> nadp[c] + 2 gthrd[c]	-2936.1	2936.1		Glutamate metabolism	0	0	1000	0	4	3.2.1.50	NOTES:electrogenic uptake NJ	PMID:12851823,PMID:7592981,PMID:8132774,PMID:9109432
GTHOm	glutathione oxidoreductase	h[m] + nadph[m] + gthox[m] -> nadp[m] + 2 gthrd[m]	-2936.1	2936.1		Glutamate metabolism	0	0	1000	0	4	3.2.1.50	NOTES:for bile acid secretion into bile NJ	PMID:9738950,PMID:9806540,PMID:9813153
GTHP	glutathione peroxidase	h2o2[c] + 2 gthrd[c] -> 2 h2o[c] + gthox[c]	(7001.3) or (5052.3) or (2877.1) or (2876.2) or (5052.2) or (2876.1) or (5052.1) or (7001.1) or (2879.1) or (7001.2)	2876.1 2876.2 2877.1 2879.1 5052.1 5052.2 5052.3 7001.1 7001.2 7001.3		Glutathione metabolism	0	0	1000	0	4	3.2.1.50	NOTES:	PMID:15321791
GTHPm	glutathione peroxidase, mitochondria	h2o2[m] + 2 gthrd[m] -> 2 h2o[m] + gthox[m]	(10935.1) or (10935.2) or (2879.1)	10935.1 10935.2 2879.1		Glutathione metabolism	0	0	1000	0	4	3.2.1.50	NOTES:
GTHRDt	Glutathione transport into mitochondria	h2o[c] + atp[c] + gthrd[c] -> adp[c] + h[c] + pi[c] + gthrd[m]				Glutathione metabolism	0	0	1000	0	1	2.7.8.15	NOTES:unknown mechanism for transport - no strong evidence to indicate further lysosomal or golgi metabolism NJ
GTPCI	GTP cyclohydrolase I	h2o[c] + gtp[c] -> h[c] + for[c] + ahdt[c]	-2643.1	2643.1		Tetrahydrobiopterin metabolism	0	0	1000	0	1	2.4.1.141	NOTES:unknown mechanism for transport - no strong evidence to indicate further lysosomal or golgi metabolism NJ
GUAPRT	guanine phosphoribosyltransferase	prpp[c] + gua[c] -> ppi[c] + gmp[c]	-3251.1	3251.1		Nucleotide salvage pathway	0	0	1000	0	4		NOTES:NCD	PMID:11027560,PMID:11068039,PMID:12675135
GUAt	Guanine transport	gua[e] <=> gua[c]	-3177.1	3177.1		Transport, extracellular	1	-1000	1000	0	1		NOTES:unknown mechanism NJ
GULLACter	gulonolactone endoplasmic reticular transport	gullac[c] -> gullac[r]				Transport, endoplasmic reticular	0	0	1000	0	2		NOTES:it
GULN3D	L-gulonate 3-dehydrogenase	nad[c] + guln[c] <=> h[c] + nadh[c] + 3dhguln[c]				Pentose phosphate pathway	1	-1000	1000	0	1		NOTES:unknown mechanism NJ
GULNDer	gulonate dehydrogenase, endoplasmic reticulum	h[r] + nadph[r] + glcur[r] <=> nadp[r] + guln[r]				Pentose phosphate pathway	1	-1000	1000	0	4	3.1.1.17	NOTES:SAB electrogenic, Na indepdendent &amp; rev	PMID:12883891
GULNter	L-gulonate endoplasmic reticular export	guln[r] -> guln[c]				Transport, endoplasmic reticular	0	0	1000	0	4		NOTES:NJ	PMID:12145317,PMID:9799594
H2O2t	hydrogen peroxide transport via diffusion	h2o2[e] <=> h2o2[c]				Transport, extracellular	1	-1000	1000	0	4		NOTES:IT	PMID:10655069,PMID:12600718
H2O2tly	hydrogen peroxide lysosomal transport via diffusion	h2o2[c] <=> h2o2[l]				Transport, lysosomal	1	-1000	1000	0	2		NOTES:specific mechanism not known, proton dependence for trans-mit transport has been suggested, however directionality and stoichiometry has not yet been elucidated. see PMID: 12770731 and others NJ. NS: transport from lysozyme to mitochondria?	PMID:12070139,PMID:12370263,PMID:12770731
H2O2tm	hydrogen peroxide mitochondrial transport	h2o2[c] -> h2o2[m]				Transport, mitochondrial	0	0	1000	0	2		NOTES:specific mechanism not known, proton dependence for trans-mit transport has been suggested, however directionality and stoichiometry has not yet been elucidated. see PMID: 12770731 and others NJ	PMID:12370263,PMID:12770731
H2O2tn	hydrogen peroxide nuclear transport	h2o2[c] <=> h2o2[n]				Transport, nuclear	1	-1000	1000	0	2	1.1.1.20	NOTES:specific mechanism not known, proton dependence for trans-mit transport has been suggested, however directionality and stoichiometry has not yet been elucidated. see PMID: 12770731 and others NJ	PMID:12370263,PMID:12770731
H2O2tp	hydrogen peroxide peroxisomal transport via diffusion	h2o2[c] <=> h2o2[x]				Transport, peroxisomal	1	-1000	1000	0	4	2.7.2.11	NOTES:IT	PMID:10655069,PMID:12600718
H2Oter	H2O endoplasmic reticulum transport	h2o[c] <=> h2o[r]				Transport, endoplasmic reticular	1	-1000	1000	0	4	1.4.1.3	NOTES:NCD	PMID:11085997
H2Otg	H2O transport, Golgi apparatus	h2o[c] <=> h2o[g]				Transport, golgi apparatus	1	-1000	1000	0	4	1.4.1.4	NOTES:NCD	PMID:11085997
H2Otly	H2O transport, lysosomal	h2o[c] <=> h2o[l]				Transport, lysosomal	1	-1000	1000	0	0	3.5.1.2	NOTES:JLR	PMID:11741334
H2Otn	H2O transport, nuclear	h2o[n] <=> h2o[c]				Transport, nuclear	1	-1000	1000	0	2		NOTES:NCD	PMID:13502348,PMID:13783048
H2Otp	H2O transport, peroxisomal	h2o[c] <=> h2o[x]				Transport, peroxisomal	1	-1000	1000	0	2	1.3.99.7	NOTES:also EC 4.1.3.22 NCD	PMID:13783048
HACD1m	3-hydroxyacyl-CoA dehydrogenase (acetoacetyl-CoA) (mitochondria)	h[m] + nadh[m] + aacoa[m] <=> nad[m] + 3hbcoa[m]	(3028.1) or (3033.1) or (3030.1) and (3032.1)	3028.1 3030.1 3032.1 3033.1		Tryptophan metabolism	1	-1000	1000	0	4		NOTES:TDV	PMID:14598172
HACD9m	3-hydroxyacyl-CoA dehydrogenase (2-Methylacetoacetyl-CoA), mitochondrial	nad[m] + 3hmbcoa[m] <=> h[m] + nadh[m] + 2maacoa[m]	-3028.1	3028.1		Valine, leucine, and isoleucine metabolism	1	-1000	1000	0	4	2.7.1.31	NOTES:NCD	PMID:8946005,PMID:8967342
HAtly	hyaluronan transport, extracellular to lysosome	ha[e] -> ha[l]				Transport, lysosomal	0	0	1000	0	4		NOTES:antiport with malate IF	PMID:14598172
HDCAter	palmitate ER export	hdca[r] -> hdca[c]				Transport, endoplasmic reticular	0	0	1000	0	4		NOTES:antiport with PEP IF	PMID:14598172
HDCAtr	fatty acid transport via diffusion	hdca[e] <=> hdca[c]				Transport, extracellular	1	-1000	1000	0	4	3.1.2.6	NOTES:kegg C02305 MJC	PMID:1917943,PMID:2914937
HDCEAtr	fatty acid transport via diffusion	hdcea[e] <=> hdcea[c]				Transport, extracellular	1	-1000	1000	0	4		NOTES:kegg C02305 MJC SAB c	PMID:2883200,PMID:3034271
HEX1	hexokinase (D-glucose:ATP)	atp[c] + 2 h[c] + glc_D[c] -> adp[c] + g6p[c]	(3098.3) or (80201.1) or (2645.3) or (3098.4) or (3099.1) or (2645.2) or (3098.5) or (2645.1) or (3098.1) or (3101.1) or (3098.2)	2645.1 2645.2 2645.3 3098.1 3098.2 3098.3 3098.4 3098.5 3099.1 3101.1 80201.1		Glycolysis/gluconeogenesis	0	0	3.55768	0	2	1.7.1.7	NOTES:SAB	PMID:12759755
HEX10	hexokinase (D-glucosamine:ATP)	atp[c] + 2 h[c] + gam[c] -> adp[c] + gam6p[c]	(2645.1) or (3099.1) or (3098.3) or (2645.2) or (80201.1) or (3098.2) or (2645.3) or (3098.1) or (3098.4) or (3101.1) or (3098.5)	2645.1 2645.2 2645.3 3098.1 3098.2 3098.3 3098.4 3098.5 3099.1 3101.1 80201.1		Aminosugar metabolism	0	0	1000	0	2		NOTES:SAB	PMID:12759755
HEX4	hexokinase (D-mannose:ATP)	atp[c] + 2 h[c] + man[c] -> adp[c] + man6p[c]	(3098.2) or (2645.2) or (3098.3) or (2645.3) or (3098.4) or (3099.1) or (3098.5) or (3098.1) or (3101.1) or (80201.1) or (2645.1)	2645.1 2645.2 2645.3 3098.1 3098.2 3098.3 3098.4 3098.5 3099.1 3101.1 80201.1		Fructose and mannose metabolism	0	0	1000	0	2	1.1.1.44	NOTES:SAB	PMID:12759755
HISt4	L-histidine transport in via sodium symport	na1[e] + his_L[e] -> na1[c] + his_L[c]	(11254.1) or (54407.1)	11254.1 54407.1		Transport, extracellular	0	0	1000	0	2	1.1.1.44	NOTES:SAB	PMID:12759755
HMGCOAtm	Hydroxymethylglutaryl-CoA reversible mitochondrial transport	hmgcoa[c] <=> hmgcoa[m]				Transport, mitochondrial	1	-1000	1000	0	2	3.1.4.46	NOTES:SAB	PMID:12759755
HMGCOAtx	Hydroxymethylglutaryl-CoA reversible peroxisomal transport	hmgcoa[c] <=> hmgcoa[x]				Transport, peroxisomal	1	-1000	1000	0	2	2.5.1.10	NOTES:interaction between peroxisomes and ER (some enzymes on the outer membrane) NJ
HMGLm	hydroxymethylglutaryl-CoA lyase	hmgcoa[m] -> accoa[m] + acac[m]	(3155.1) or (54511.1)	3155.1 54511.1		Cholesterol metabolism	0	0	1000	0	4		NOTES:NJ
HMGLx	hydroxymethylglutaryl-CoA lyase	hmgcoa[x] -> accoa[x] + acac[x]	-3155.1	3155.1		Cholesterol metabolism	0	0	1000	0	4		NOTES:NJ
HOMt4	L-homoserine via sodium symport	na1[e] + hom_L[e] -> na1[c] + hom_L[c]	(6541.1) or (84889.1) or (6542.1)	6541.1 6542.1 84889.1		Transport, extracellular	0	0	1000	0	4	1.8.1.7	NOTES:NJ
HPYRRy	Hydroxypyruvate reductase (NADPH)	h[c] + nadph[c] + hpyr[c] -> nadp[c] + glyc_R[c]	-9380.1	9380.1		Glyoxylate and dicarboxylate metabolism	0	0	1000	0	2	1.8.1.7	NOTES:NJ	PMID:11788354,PMID:12864740
HRETNtn	4-hydroxyretinoic acid transport, Nuclear	hretn[c] <=> hretn[n]				Transport, nuclear	1	-1000	1000	0	0	1.11.1.9	NOTES:NJ	PMID:10799718
HS1ly	heparan-N-sulfatase, lysosomal	h2o[l] + hs_deg1[l] -> h[l] + so4[l] + hs_deg2[l]	-6448.1	6448.1		Heparan sulfate degradation	0	0	1000	0	4	1.11.1.9	NOTES:NCD	PMID:12759756,PMID:9010752,PMID:9644260
HS2ly	heparan-N-sulfatase, lysosomal	h2o[l] + hs_deg6[l] -> h[l] + so4[l] + hs_deg7[l]	-6448.1	6448.1		Heparan sulfate degradation	0	0	1000	0	2		NOTES:NCD
HS3ly	heparan-N-sulfatase, lysosomal	h2o[l] + hs_deg12[l] -> h[l] + so4[l] + hs_deg13[l]	-6448.1	6448.1		Heparan sulfate degradation	0	0	1000	0	2	3.5.4.16	NOTES:NCD	PMID:9689047
HS4ly	heparan-N-sulfatase, lysosomal	h2o[l] + hs_deg18[l] -> h[l] + so4[l] + hs_deg19[l]	-6448.1	6448.1		Heparan sulfate degradation	0	0	1000	0	2	2.4.2.8	NOTES:NCD	PMID:9689047
HSAT1ly	heparan-glucosaminide N-acetyltransferase, lysosomal	accoa[c] + hs_deg2[l] -> coa[c] + h[l] + hs_deg3[l]				Heparan sulfate degradation	0	0	1000	0	1		NOTES:tv renamed from CO2TPr to CO2t NCD
HSAT2ly	heparan-glucosaminide N-acetyltransferase, lysosomal	accoa[c] + hs_deg7[l] -> coa[c] + h[l] + hs_deg8[l]				Heparan sulfate degradation	0	0	1000	0	1		NOTES:NCD
HSAT3ly	heparan-glucosaminide N-acetyltransferase, lysosomal	accoa[c] + hs_deg13[l] -> coa[c] + h[l] + hs_deg14[l]				Heparan sulfate degradation	0	0	1000	0	1	1.1.1.45	NOTES:NCD
HSAT4ly	heparan-glucosaminide N-acetyltransferase, lysosomal	accoa[c] + hs_deg19[l] -> coa[c] + h[l] + hs_deg20[l]				Heparan sulfate degradation	0	0	1000	0	4	1.1.1.19	NOTES:IF	PMID:3081508
HSD17B1	testicular 17-beta-hydroxysteroid dehydrogenase	h[c] + nadph[c] + estrone[c] <=> nadp[c] + estradiol[c]	(3292.1) or (7923.1)	3292.1 7923.1		Steroid metabolism	1	-1000	1000	0	1		NOTES:NCD
HSD17B7r	testicular 17-beta-hydroxysteroid dehydrogenase	h[r] + nadph[r] + estrone[r] -> nadp[r] + estradiol[r]	-51478.1	51478.1		Steroid metabolism	0	0	1000	0	1		NOTES:NCD
HSPASEly	heparan sulfate proteoglycan protease, lysosome (endosome)	h2o[l] + hspg[l] -> Ser_Gly_Ala_X_Gly[l] + hs[l]				Heparan sulfate degradation	0	0	1000	0	1		NOTES:
HSPGtly	heparan sulfate transport, extracellular to lysosome	hspg[e] -> hspg[l]				Transport, lysosomal	0	0	1000	0	2		NOTES:IT	PMID:6313022
Htg	proton diffusion (Golgi)	h[g] <=> h[c]				Transport, golgi apparatus	1	-1000	1000	0	4		NOTES:TV May not a &quot;real&quot; transporter, use in heart mitochondria model only	PMID:14598172
Htm	Uncoupling protein	h[c] -> h[m]	(9016.1) or (7352.2) or (7352.1) or (7351.1) or (9016.2) or (7350.1) or (9481.1)	7350.1 7351.1 7352.1 7352.2 9016.1 9016.2 9481.1		Transport, mitochondrial	0	0	1000	0	2		NOTES:NCD
Htr	H transporter, endoplasmic reticulum	h[c] <=> h[r]				Transport, endoplasmic reticular	1	-1000	1000	0	1		NOTES:NCD
Htx	H transporter, peroxisome	h[c] <=> h[x]				Transport, peroxisomal	1	-1000	1000	0	1		NOTES:diffusion NJ
HXPRT	hypoxanthine phosphoribosyltransferase (Hypoxanthine)	prpp[c] + hxan[c] -> ppi[c] + imp[c]	-3251.1	3251.1		Nucleotide salvage pathway	0	0	1000	0	4		NOTES:SAB	PMID:9169443
HYPOE	hypothetical enyme	h2o[c] + pyam5p[c] -> pi[c] + pydam[c]	-57026.1	57026.1		Vitamin B6 metabolism	0	0	1000	0	4		NOTES:_2.1.1.114 IT	PMID:10777520,PMID:11051212,PMID:1965190,PMID:7380842
HYPTROX	Hypotaurine oxidase	o2[c] + 2 hyptaur[c] -> 2 taur[c]				Taurine and hypotaurine metabolism	0	0	1000	0	2		NOTES:_2.1.1.- IT	PMID:10777520,PMID:1965190,PMID:7380842
HYXNt	Hypoxanthine transport	hxan[e] <=> hxan[c]	-3177.1	3177.1		Transport, extracellular	1	-1000	1000	0	4	1.1.1.35	NOTES:_1.13.12.- IT	PMID:11051212,PMID:1965190,PMID:7380842
ICDHxm	Isocitrate dehydrogenase (NAD+)	nad[m] + icit[m] -> akg[m] + co2[m] + nadh[m]	(3421.2 and 3420.3 and 3419.1) or (3420.1 and 3421.1 and 3419.1) or (3420.1 and 3421.1 and 3419.1) or (3420.3 and 3421.1 and 3419.1) or (3421.1 and 3419.1 and 3420.2) or (3421.2 and 3419.1 and 3420.2)	3419.1 3420.1 3420.2 3420.3 3421.1 3421.2		Citric acid cycle	0	0	1000	0	4	1.1.1.35	NOTES:_1.14.13.- IT	PMID:11051212,PMID:1965190,PMID:7380842
ICDHyrm	Isocitrate dehydrogenase (NADP+)	nadp[m] + icit[m] <=> nadph[m] + akg[m] + co2[m]	-3418.1	3418.1		Citric acid cycle	1	-1000	1000	0	0		NOTES:NCD	PMID:10753916,PMID:9915862
IDOAASE1ly	alpha-L-iduronidase, lysosomal	h2o[l] + hs_deg4[l] -> hs_deg5[l] + idour[l]	-3425.1	3425.1		Heparan sulfate degradation	0	0	1000	0	0		NOTES:NCD	PMID:11821425
IDOAASE2ly	alpha-L-iduronidase, lysosomal	h2o[l] + hs_deg16[l] -> idour[l] + hs_deg17[l]	-3425.1	3425.1		Heparan sulfate degradation	0	0	1000	0	0		NOTES:NCD	PMID:9915862
IDOAASE3ly	alpha-L-iduronidase, lysosomal	h2o[l] + hs_deg22[l] -> idour[l] + hs_deg23[l]	-3425.1	3425.1		Heparan sulfate degradation	0	0	1000	0	0		NOTES:EC 2.4.1.- NCD
IDOURtly	iduronate transport into lysososme	h[c] + idour[c] <=> h[l] + idour[l]	-26503.1	26503.1		Transport, lysosomal	1	-1000	1000	0	0		NOTES:NCD	PMID:9915862
IDPtn	IDP nuclear transport	idp[c] <=> idp[n]				Transport, nuclear	1	-1000	1000	0	0	2.7.1.1	NOTES:EC 2.4.1.- NCD
ILEtec	L-isoleucine transport via diffusion (extracellular to cytosol)	ile_L[e] <=> ile_L[c]	(8501.1) or (124935.1)	124935.1 8501.1		Transport, extracellular	1	-1000	1000	0	0	2.7.1.7	NOTES:EC 2.4.1.- NCD
IMPC	IMP cyclohydrolase	h2o[c] + imp[c] <=> fprica[c]	-471.1	471.1		Purine synthesis	1	-1000	1000	0	2		NOTES:TDV
IMPD	IMP dehydrogenase	h2o[c] + nad[c] + imp[c] -> h[c] + nadh[c] + xmp[c]	(3614.1) or (3615.1) or (3614.2)	3614.1 3614.2 3615.1		Nucleotide interconversion	0	0	1000	0	2		NOTES:IT reaction involved in formation of 4-hydroxybenzoate from tyrosine. (EC 6.2.1.12) .	PMID:11583838,PMID:12232327
INSt	Inosine transport (diffusion)	ins[e] <=> ins[c]	(3177.1) or (2030.1)	2030.1 3177.1		Transport, extracellular	1	-1000	1000	0	2		NOTES:unknown mechanism, related cyp P450 metabolism reactions NJ
IPDDIx	isopentenyl-diphosphate D-isomerase	ipdp[x] <=> dmpp[x]	(3422.1) or (91734.1)	3422.1 91734.1		Cholesterol metabolism	1	-1000	1000	0	4	4.1.3.4	NOTES:SAB
IPDPtx	Isopentenyl diphosphate transport (peroxisome)	ipdp[x] <=> ipdp[c]				Transport, peroxisomal	1	-1000	1000	0	2	4.1.3.4	NOTES:r0608, JLR	PMID:8407975
ITCOAL1m	Itaconate--CoA ligase (GDP-forming), mitochondrial	coa[m] + gtp[m] + itacon[m] <=> pi[m] + gdp[m] + itaccoa[m]	(8802.1 and 8801.1)	8801.1 8802.1		C5-branched dibasic acid metabolism	1	-1	1	0	4		NOTES:SAB	PMID:12719981
ITCOALm	Itaconate--CoA ligase (ADP-forming), mitochondrial	coa[m] + atp[m] + itacon[m] <=> h[m] + adp[m] + pi[m] + itaccoa[m]	(8802.1 and 8803.1)	8802.1 8803.1		C5-branched dibasic acid metabolism	1	-1	1	0	2	1.1.1.79	NOTES:SAB	PMID:14977199,PMID:3896131
ITPtn	ITP nuclear transport	itp[c] <=> itp[n]				Transport, nuclear	1	-1000	1000	0	2		NOTES:unknown mechanism for transport, may be vesicular/caveolar/other ... intracellular transport and extracellular export mechanisms must exist - see for example: PMID: 15585321 NJ	PMID:15585321
KAS8	b-ketoacyl synthetase (palmitate, n-C16:0)	20 h[c] + 14 nadph[c] + accoa[c] + 7 malcoa[c] -> 6 h2o[c] + 14 nadp[c] + 7 co2[c] + 8 coa[c] + hdca[c]	-2194.1	2194.1		Fatty acid synthesis	0	0	1000	0	0	3.10.1.1	NOTES:copied from NCD&apos;s CRNCARtp NJ
KCC2t	K+-Cl- cotransporter (NH4+)	nh4[e] + cl[e] <=> nh4[c] + cl[c]	(6560.1) or (10723.1) or (9990.1)	10723.1 6560.1 9990.1		Transport, extracellular	1	-1000	1000	0	0	3.10.1.1	NOTES:NCD
KCCt	K+-Cl- cotransport	k[e] + cl[e] <=> k[c] + cl[c]	(10723.1) or (57468.1) or (9990.1) or (6560.1)	10723.1 57468.1 6560.1 9990.1		Transport, extracellular	1	-1000	1000	0	4	3.10.1.1	NOTES:NCD	PMID:12827517,PMID:12883891,PMID:9933568
KDNH	2-keto-3deoxy-D-glycero-D-galactononic acid phosphohydrolase	h2o[c] + kdnp[c] -> pi[c] + kdn[c]				Aminosugar metabolism	0	0	1000	0	4	3.10.1.1	NOTES:SAB H+ stoichiometry unknown	PMID:12883891
KSII_CORE2t	keratan sulfate II (core2) transport, golgi to extracellular	ksii_core2[g] -> ksii_core2[e]				Transport, extracellular	0	0	1000	0	4	2.3.1.78	NOTES:NCD	PMID:14598172
KSII_CORE2tly	keratan sulfate II (core 2) transport, extracellular to lysosome	ksii_core2[e] -> ksii_core2[l]				Transport, lysosomal	0	0	1000	0	4	2.3.1.78	NOTES:SAB	PMID:12883891
KSII_CORE4tly	keratan sulfate II (core 4) transport, extracellular to lysosome	ksii_core4[e] -> ksii_core4[l]				Transport, lysosomal	0	0	1000	0	2	2.3.1.78	NOTES:mechanism not currently elucidated NJ	PMID:12814641,PMID:15464416
LALDO	D-Lactaldehyde:NAD+ oxidoreductase (glutathione-formylating)	nad[c] + lald_D[c] + gthrd[c] <=> h[c] + nadh[c] + lgt_S[c]	-128.1	128.1		Pyruvate metabolism	1	-1000	1000	0	2	2.3.1.78	NOTES:SAB
LALDO2x	D-Lactaldehyde:NAD+ 1-oxidoreductase	h[c] + nadh[c] + mthgxl[c] -> nad[c] + lald_D[c]	-8574.1	8574.1		Pyruvate metabolism	0	0	1000	0	2	1.1.1.62	NOTES:
LCADi	lactaldehyde dehydrogenase	h2o[c] + nad[c] + lald_L[c] -> 2 h[c] + nadh[c] + lac_L[c]	(218.1) or (223.1) or (8854.2) or (224.1) or (222.1) or (8854.1) or (221.1) or (216.1) or (8854.3) or (501.1) or (220.1)	216.1 218.1 220.1 221.1 222.1 223.1 224.1 501.1 8854.1 8854.2 8854.3		Pyruvate metabolism	0	0	1000	0	1	1.1.1.62	NOTES:unknown mechanism NJ
LCADi_D	lactaldehyde dehydrogenase	h2o[c] + nad[c] + lald_D[c] -> 2 h[c] + nadh[c] + lac_D[c]	(218.1) or (223.1) or (8854.2) or (224.1) or (222.1) or (8854.1) or (221.1) or (216.1) or (8854.3) or (501.1) or (220.1)	216.1 218.1 220.1 221.1 222.1 223.1 224.1 501.1 8854.1 8854.2 8854.3		Pyruvate metabolism	0	0	1000	0	1		NOTES:unknown mechanism NJ
LCAT1e	Lecithin-cholesterol acyltransferase	chsterol[e] + pchol_hs[e] -> lpchol_hs[e] + xolest2_hs[e]	-3931.1	3931.1		Fatty acid oxidation	0	0	1000	0	2		NOTES:
LEUKTRA4t	leukotriene A4 transport	leuktrA4[e] <=> leuktrA4[c]				Transport, extracellular	1	-1000	1000	0	1		NOTES:unknown mechanism NJ
LEUKTRB4t	leukotriene B4 transport	leuktrB4[e] <=> leuktrB4[c]				Transport, extracellular	1	-1000	1000	0	1		NOTES:unknown mechanism NJ
LEUKTRD4t	leukotriene D4 transport	leuktrD4[e] <=> leuktrD4[c]				Transport, extracellular	1	-1000	1000	0	2		NOTES:NJ	PMID:11788354,PMID:12864740
LEUKTRE4t	leukotriene E4 transport	leuktrE4[e] <=> leuktrE4[c]				Transport, extracellular	1	-1000	1000	0	1		NOTES:Note that this reaction occurs in the endosome during endocytosis, but has been compartmentalized as lysosomal. NCD	PMID:8993162
LEUKTRF4t	leukotriene F4 transport	leuktrF4[e] <=> leuktrF4[c]				Transport, extracellular	1	-1000	1000	0	1	2.4.2.8	NOTES:Note that this reaction occurs in the endosome during endocytosis, but has been compartmentalized as lysosomal. NCD	PMID:8993162
LEUt4	L-leucine transport in via sodium symport	na1[e] + leu_L[e] -> na1[c] + leu_L[c]	(81539.1) or (84889.1) or (6520.1) or (6542.1) or (6541.1) or (11254.1) or (55089.1)	11254.1 55089.1 6520.1 6541.1 6542.1 81539.1 84889.1		Transport, extracellular	0	0	1000	0	1		NOTES:Note that this reaction occurs in the endosome during endocytosis, but has been compartmentalized as lysosomal. NCD	PMID:8993162
LEUtec	L-leucine transport via diffusion (extracellular to cytosol)	leu_L[e] <=> leu_L[c]	(8501.1) or (124935.1)	124935.1 8501.1		Transport, extracellular	1	-1000	1000	0	1		NOTES:Note that this reaction occurs in the endosome during endocytosis, but has been compartmentalized as lysosomal. NCD	PMID:8993162
LGNCCOAtx	fatty acid intracellular transport	lgnccoa[c] <=> lgnccoa[x]				Transport, peroxisomal	1	-1000	1000	0	1		NOTES:Note that this reaction occurs in the endosome during endocytosis, but has been compartmentalized as lysosomal. NCD	PMID:8993162
LGNCt	fatty acid transport via diffusion	lgnc[e] <=> lgnc[c]				Transport, extracellular	1	-1000	1000	0	0	1.1.1.41	NOTES:IF old EC number (4.1.3.7) is obsolete -- transferred to 2.3.3.1 NCD. Biochemical	PMID:16006620,PMID:9933076
LGTHL	lactoylglutathione lyase	mthgxl[c] + gthrd[c] -> lgt_S[c]	-2739.1	2739.1		Pyruvate metabolism	0	0	1000	0	4	1.1.1.42	NOTES:TDV	PMID:11257506,PMID:3759988
LINKDEG1ly	degradation of proteoglycan linkage region, lysosomal	3 h2o[l] + hs_deg25[l] -> 2 gal[l] + glcur[l] + xyl_D[l]				Heparan sulfate degradation	0	0	1000	0	4	3.2.1.76	NOTES:NJ	PMID:15464416,PMID:7829107
LINKDEG3ly	degradation of proteoglycan linkage region, lysosomal	4 h2o[l] + cs_c_deg5[l] -> h[l] + so4[l] + 2 gal[l] + glcur[l] + xyl_D[l]				Chondroitin sulfate degradation	0	0	1000	0	4	3.2.1.76	NOTES:NJ	PMID:7654220,PMID:7829107
LINKDEG4ly	degradation of proteoglycan linkage region, lysosomal	5 h2o[l] + cs_e_deg7[l] -> 2 h[l] + 2 so4[l] + 2 gal[l] + glcur[l] + xyl_D[l]				Chondroitin sulfate degradation	0	0	1000	0	2	3.2.1.76	NOTES:mm	PMID:11257506,PMID:3759988
L_LACt2r	L-lactate reversible transport via proton symport	h[e] + lac_L[e] <=> h[c] + lac_L[c]	(9194.1) or (23539.1) or (6566.1) or (9123.1)	23539.1 6566.1 9123.1 9194.1		Transport, extracellular	1	-1000	1000	0	4		NOTES:TDV	PMID:3759988
L_LACt4r	L-lactate reversible transport via sodium symport	na1[e] + lac_L[e] <=> na1[c] + lac_L[c]				Transport, extracellular	1	-1000	1000	0	2		NOTES:NCD	PMID:7829107
LNELDCt	fatty acid transport via diffusion	lneldc[e] <=> lneldc[c]				Transport, extracellular	1	-1000	1000	0	4		NOTES:IF	PMID:11257506,PMID:7829107
LNLCt	Linoleic acid (n-C18:2) transport in via diffusion	lnlc[e] <=> lnlc[c]				Transport, extracellular	1	-1000	1000	0	2	3.5.4.10	NOTES:JLR. Part of a famous suicide gene combination with 5-fluorocytosine
LNLNCAt	fatty acid transport via diffusion	lnlnca[e] <=> lnlnca[c]				Transport, extracellular	1	-1000	1000	0	4	1.1.1.205	NOTES:IT	PMID:12006583,PMID:12838422
LNLNCGt	fatty acid transport via diffusion	lnlncg[e] <=> lnlncg[c]				Transport, extracellular	1	-1000	1000	0	2		NOTES:
LPASE	lysophospholipase	h2o[c] + lpchol_hs[c] -> h[c] + Rtotal[c] + g3pc[c]	(5321.1) or (1178.1) or (29124.1)	1178.1 29124.1 5321.1		Glycerophospholipid metabolism	0	0	1000	0	2	5.3.3.2	NOTES:
LPCHOLt	lysophosphatidylcholine transport	lpchol_hs[e] <=> lpchol_hs[c]				Transport, extracellular	1	-1000	1000	0	2	5.3.3.2	NOTES:
LRAT1	Lecithin retinol acyltransferase (11-cis)	pchol_hs[c] + retinol_cis_11[c] -> lpchol_hs[c] + 11_cis_retfa[c]				Vitamin A metabolism	0	0	1000	0	2	6.2.1.4	NOTES:
LRAT2	Lecithin retinol acyltransferase (9-cis)	pchol_hs[c] + retinol_9_cis[c] -> lpchol_hs[c] + 9_cis_retfa[c]				Vitamin A metabolism	0	0	1000	0	2	6.2.1.5	NOTES:
LTA4H	Leukotriene A-4 hydrolase	h2o[c] + leuktrA4[c] -> leuktrB4[c]	-4048.1	4048.1		Eicosanoid metabolism	0	0	1000	0	2		NOTES:
LTC4CP	Leukotriene C4 carboxypeptidase	h2o[c] + leuktrC4[c] <=> gly[c] + leuktrF4[c]				Eicosanoid metabolism	1	-1000	1000	0	2	2.3.1.85	NOTES:
LTD4DP	Leukotriene D4 dipeptidase	h2o[c] + leuktrD4[c] <=> gly[c] + leuktrE4[c]				Eicosanoid metabolism	1	-1000	1000	0	2		NOTES:
LYStiDF	L-lysine transport via diffusion (extracellular to cytosol)	lys_L[e] -> lys_L[c]	(6541.1) or (6542.1) or (55089.1) or (84889.1)	55089.1 6541.1 6542.1 84889.1		Transport, extracellular	0	0	1000	0	2		NOTES:
LYStm	Lysine mitochondrial transport via ornithine carrier	h[m] + lys_L[c] <=> h[c] + lys_L[m]	(83884.1) or (10166.1)	10166.1 83884.1		Transport, mitochondrial	1	-1000	1000	0	2		NOTES:
M1316Mg	mannosyl-oligosaccharide 1,3-1,6-alpha-mannosidase	2 h2o[g] + nm4masn[g] -> 2 man[g] + nm2masn[g]	(4124.1) or (4122.1)	4122.1 4124.1		N-glycan synthesis	0	0	1000	0	2		NOTES:
M13N2Tg	alpha-1,3-mannosyl-glycoprotein 2-beta-N-acetylglucosaminyltransferase	uacgam[g] + m4masn[g] -> h[g] + udp[g] + nm4masn[g]	-4245.1	4245.1		N-glycan synthesis	0	0	1000	0	4		NOTES:
M13N4Tg	alpha-1,3-mannosyl-glycoprotein 4-beta-N-acetylglucosaminyltransferase	uacgam[g] + n2m2masn[g] -> h[g] + udp[g] + n3m2masn[g]	(11320.1) or (11282.2) or (11282.1)	11282.1 11282.2 11320.1		N-glycan synthesis	0	0	1000	0	2		NOTES:IT
M16N4Tg	alpha-1,6-mannosyl-glycoprotein 4-beta-N-acetylglucosaminyltransferase	uacgam[g] + n4m2masn[g] -> h[g] + udp[g] + n5m2masn[g]				N-glycan synthesis	0	0	1000	0	2	1.1.1.1	NOTES:assumed to be readily diffusible MM
M16N6Tg	alpha-1,6-mannosyl-glycoprotein 6-beta-N-acetylglucosaminyltransferase	uacgam[g] + n3m2masn[g] -> h[g] + udp[g] + n4m2masn[g]	-4249.1	4249.1		N-glycan synthesis	0	0	1000	0	0	1.1.1.21	NOTES:assumed to be readily diffusible MM
M16NTg	alpha-1,6-mannosyl-glycoprotein 2-beta-N-acetylglucosaminyltransferase	uacgam[g] + nm2masn[g] -> h[g] + udp[g] + n2m2masn[g]	-4247.1	4247.1		N-glycan synthesis	0	0	1000	0	0	1.2.1.21	NOTES:proteins
M4MPDOL_Lter	m4mpdol flippase	m4mpdol_L[c] -> m4mpdol_L[r]				N-glycan synthesis	0	0	1000	0	4	1.2.1.21	NOTES:INVALID ECO TERM: IFH	PMID:10453733,PMID:11047755
M8MASNterg	m8masn transport from ER to Golgi apparatus	m8masn[r] -> m8masn[g]				N-glycan synthesis	0	0	1000	0	4	2.3.1.43	NOTES:SAB see Kanai and Hediger 2004 (2003), PMID 14530974	PMID:14530974
MALT	alpha-glucosidase	h2o[c] + malt[c] -> 2 glc_D[c]	-2595.1	2595.1		Starch and sucrose metabolism	0	0	1000	0	4	1.1.1.27	NOTES:SAB see Kanai and Hediger 2004 (2003), PMID 14530974	PMID:14530974
MALTt1r	maltose transport (uniport)	malt[e] <=> malt[c]	-6515.1	6515.1		Transport, extracellular	1	-1000	1000	0	4		NOTES:SAB see Kanai and Hediger 2004 (2003), PMID 14530974	PMID:14530974
MAN1PT2	mannose-1-phosphate guanylyltransferase (GDP)	h[c] + gdp[c] + man1p[c] -> pi[c] + gdpmann[c]	(29926.2) or (29926.1) or (29925.2) or (29925.1)	29925.1 29925.2 29926.1 29926.2		Fructose and mannose metabolism	0	0	1000	0	4		NOTES:reaction according to KEGG MM	PMID:15189131,PMID:932033
MAN6PI	mannose-6-phosphate isomerase	man6p[c] <=> f6p[c]	-4351.1	4351.1		Fructose and mannose metabolism	1	-1000	1000	0	2		NOTES:	PMID:10734121,PMID:10863037,PMID:14770310
MANt1r	mannose transport (uniport)	man[e] <=> man[c]	(6513.1) or (6515.1) or (6514.1)	6513.1 6514.1 6515.1		Transport, extracellular	1	-1000	1000	0	2		NOTES:Merged CYSGLYexR and CYSGLYex - (May 2011) IT	PMID:10734121,PMID:10863037,PMID:14770310
MANtly	mannose efflux from lysosome	man[l] -> man[c]				Transport, lysosomal	0	0	1000	0	4		NOTES:according to reaction in KEGG MM	PMID:15189131
MCCCrm	methylcrotonoyl-CoA carboxylase, mitochondrial	atp[m] + hco3[m] + 3mb2coa[m] <=> 2 h[m] + adp[m] + pi[m] + 3mgcoa[m]	(56922.1 and 64087.1)	56922.1 64087.1		Valine, leucine, and isoleucine metabolism	1	-1000	1000	0	4		NOTES:IT	PMID:14514920
MCD	Malonyl-CoA Decarboxylase cytoplasmic	h[c] + malcoa[c] -> co2[c] + accoa[c]				Exchange	0	0	1000	0	4		NOTES:SAB see Kanai and Hediger 2004 (2003), PMID 14530974	PMID:14530974
MCDm	Malonyl-CoA Decarboxylase, mitochondrial	h[m] + malcoa[m] -> co2[m] + accoa[m]	-23417.1	23417.1		Fatty acid oxidation	0	0	1000	0	2		NOTES:SAB	PMID:11133652,PMID:12719981
MCITS	2-methylcitrate synthase	h2o[c] + ppcoa[c] + oaa[c] -> h[c] + 2mcit[c] + coa[c]				Propanoate metabolism	0	0	1000	0	2	4.4.1.5	NOTES:MM	PMID:15189131,PMID:7113743
MCPST	3-mercaptopyruvate sulfurtransferase	cyan[c] + mercppyr[c] -> h[c] + pyr[c] + tcynt[c]	-4357.1	4357.1		Methionine and cysteine metabolism	0	0	1000	0	2		NOTES:MM	PMID:15189131,PMID:754189
MDH	malate dehydrogenase	nad[c] + mal_L[c] <=> h[c] + nadh[c] + oaa[c]	(130752.1) or (4190.1)	130752.1 4190.1		Citric acid cycle	1	-1000	21.2633	0	4		NOTES:SAB	PMID:14624363,PMID:15659399
MDHm	malate dehydrogenase, mitochondrial	nad[m] + mal_L[m] <=> h[m] + nadh[m] + oaa[m]	-4191.1	4191.1		Citric acid cycle	1	-1000	21.2633	0	4		NOTES:NCD	PMID:10727430,PMID:15189131
MDRPD	5-Methylthio-5-deoxy-D-ribulose 1-phosphate dehydratase	5mdru1p[c] -> h2o[c] + dkmpp[c]				Arginine and Proline Metabolism	0	0	1000	0	4		NOTES:SAB see PMID 14770310	PMID:14770310
MECOALm	mesaconate--CoA ligase (ADP-forming), mitochondrial	coa[m] + atp[m] + mescon[m] <=> h[m] + adp[m] + pi[m] + mescoa[m]	(8802.1 and 8803.1)	8802.1 8803.1		C5-branched dibasic acid metabolism	1	-1	1	0	4		NOTES:SAB see Kanai and Hediger 2004 (2003), PMID 14530974	PMID:14530974
MECOAS1m	mesaconate--CoA ligase (GDP-forming)	coa[m] + gtp[m] + mescon[m] <=> pi[m] + gdp[m] + mescoa[m]	(8802.1 and 8801.1)	8801.1 8802.1		C5-branched dibasic acid metabolism	1	-1	1	0	4		NOTES:NCD	PMID:681363,PMID:9790750
MEOHt2	Methanol diffusion	meoh[e] <=> meoh[c]				Transport, extracellular	1	-1000	1000	0	4		NOTES:SAB see PMID 14770310
MEOHtly	Methanol transporter, lysosome	meoh[c] <=> meoh[l]				Transport, lysosomal	1	-1000	1000	0	2		NOTES:	PMID:14744791,PMID:15087440,PMID:7923172,PMID:8001985,PMID:8422236
METAT	methionine adenosyltransferase	h2o[c] + atp[c] + met_L[c] -> pi[c] + amet[c] + ppi[c]	(4143.1) or (27430.2 and 4144.1) or (27430.1 and 4144.1)	27430.1 27430.2 4143.1 4144.1		Methionine and cysteine metabolism	0	0	1000	0	2		NOTES:
METS	methionine synthase	5mthf[c] + hcys_L[c] -> h[c] + thf[c] + met_L[c]	-4548.1	4548.1		Methionine and cysteine metabolism	0	0	1000	0	1		NOTES:IT
METt4	L-methionine transport in via sodium symport	na1[e] + met_L[e] -> na1[c] + met_L[c]	(81539.1) or (11254.1) or (54407.1) or (6584.1)	11254.1 54407.1 6584.1 81539.1		Transport, extracellular	0	0	1000	0	2		NOTES:	PMID:15087440
METtec	L-methionine transport via diffusion (extracellular to cytosol)	met_L[e] <=> met_L[c]	(8501.1) or (124935.1)	124935.1 8501.1		Transport, extracellular	1	-1000	1000	0	4		NOTES:IT	PMID:10722669,PMID:12838422
MEVK1x	mevalonate kinase (atp)	atp[x] + mev_R[x] -> 2 h[x] + adp[x] + 5pmev[x]	-4598.1	4598.1		Cholesterol metabolism	0	0	1000	0	4		NOTES:SAB	PMID:12856181
MG1er	mannosyl-oligosaccharide glucosidase, endoplasmic reticulum	h2o[r] + g3m8masn[r] -> glc_D[r] + g2m8masn[r]	-7841.1	7841.1		N-glycan synthesis	0	0	1000	0	4	3.3.2.6	NOTES:IT	PMID:12838422,PMID:15701636,PMID:2925670
MG2er	mannosyl-oligosaccharide glucosidase, endoplasmic reticulum	h2o[r] + g2m8masn[r] -> glc_D[r] + g1m8masn[r]				N-glycan synthesis	0	0	1000	0	4	2.3.2.2	NOTES:IT	PMID:10722669,PMID:12838422,PMID:14607828
MG3er	mannosyl-oligosaccharide glucosidase, endoplasmic reticulum	h2o[r] + g1m8masn[r] -> glc_D[r] + m8masn[r]				N-glycan synthesis	0	0	1000	0	2	2.3.2.2	NOTES:IT
MGCHrm	methylglutaconyl-CoA hydratase (reversible), mitochondrial	h2o[m] + 3mgcoa[m] <=> hmgcoa[m]	-549.1	549.1		Valine, leucine, and isoleucine metabolism	1	-1000	1000	0	4		NOTES:
MGSA	methylglyoxal synthase	dhap[c] -> pi[c] + mthgxl[c]				Pyruvate metabolism	0	0	1000	0	4		NOTES:	PMID:10462544,PMID:11912132
MGSA2	methyglyoxylate synthase 2 (from g3p)	g3p[c] -> pi[c] + mthgxl[c]				Pyruvate metabolism	0	0	1000	0	4	3.2.1.114	NOTES:	PMID:10462544,PMID:11912132
MI1345PP	inositol-1,3,4,5-trisphosphate 5-phosphatase	h2o[c] + mi1345p[c] -> pi[c] + mi134p[c]	(3635.1) or (8867.2) or (3636.1) or (27124.2) or (8867.1) or (27124.1) or (3633.1) or (56623.1) or (3632.1)	27124.1 27124.2 3632.1 3633.1 3635.1 3636.1 56623.1 8867.1 8867.2		Inositol phosphate metabolism	0	0	1000	0	4	2.4.1.101	NOTES:	PMID:10462544,PMID:11912132
MI134P4P	inositol-1,3,4-trisphosphate 4-phosphatase	h2o[c] + mi134p[c] -> pi[c] + mi13p[c]				Inositol phosphate metabolism	0	0	1000	0	4	2.4.1.145	NOTES:	PMID:10462544,PMID:11912132
MI13PP	inositol-1,3-bisphosphate 3-phosphatase	h2o[c] + mi13p[c] -> pi[c] + mi1p_D[c]				Inositol phosphate metabolism	0	0	1000	0	4	2.4.1.201	NOTES:	PMID:10462544,PMID:11912132
MI145PK	inositol-1,4,5-trisphosphate 3-kinase	atp[c] + 2 h[c] + mi145p[c] -> adp[c] + mi1345p[c]	(3706.1) or (80271.1) or (3707.1)	3706.1 3707.1 80271.1		Inositol phosphate metabolism	0	0	1000	0	4	2.4.1.155	NOTES:	PMID:10462544,PMID:11912132
MI145PP	inositol-1,4,5-trisphosphate 5-phosphatase	h2o[c] + mi145p[c] -> pi[c] + mi14p[c]	(3635.1) or (8867.2) or (3636.1) or (27124.2) or (8867.1) or (27124.1) or (3633.1) or (56623.1) or (3632.1)	27124.1 27124.2 3632.1 3633.1 3635.1 3636.1 56623.1 8867.1 8867.2		Inositol phosphate metabolism	0	0	1000	0	4	2.4.1.143	NOTES:	PMID:10462544,PMID:11912132
MI14P4P	inositol-1,4-bisphosphate 4-phosphatase	h2o[c] + mi14p[c] -> pi[c] + mi1p_D[c]				Inositol phosphate metabolism	0	0	1000	0	4		NOTES:	PMID:10462544,PMID:11912132
MI1PP	myo-inositol 1-phosphatase	h2o[c] + mi1p_D[c] -> pi[c] + inost[c]	(3612.1) or (3613.1)	3612.1 3613.1		Inositol phosphate metabolism	0	0	1000	0	4		NOTES:	PMID:10462544,PMID:11912132
MI1PS	myo-Inositol-1-phosphate synthase	g6p[c] -> mi1p_D[c]	-51477.1	51477.1		Inositol phosphate metabolism	0	0	1000	0	4	3.2.1.20	NOTES:	PMID:10462544,PMID:11912132
MM5ag	mannosyl-oligosaccharide 1,2-alpha-mannosidase, Golgi apparatus	h2o[g] + m5masnC[g] -> man[g] + m4masn[g]	(4121.1) or (57134.1) or (10905.1)	10905.1 4121.1 57134.1		N-glycan synthesis	0	0	1000	0	1		NOTES:No evidence in the mitochondrion	PMID:17999954
MM6ag	mannosyl-oligosaccharide 1,2-alpha-mannosidase, Golgi apparatus	h2o[g] + m6masnA[g] -> man[g] + m5masnC[g]	-57134.1	57134.1		N-glycan synthesis	0	0	1000	0	4	2.7.7.22	NOTES:	PMID:10462544,PMID:11912132
MM6bg	mannosyl-oligosaccharide 1,2-alpha-mannosidase, Golgi apparatus	h2o[g] + m6masnC[g] -> man[g] + m5masnC[g]	(4121.1) or (57134.1) or (10905.1)	10905.1 4121.1 57134.1		N-glycan synthesis	0	0	1000	0	4	5.3.1.8	NOTES:
MM7Ag	mannosyl-oligosaccharide 1,2-alpha-mannosidase, Golgi apparatus	h2o[g] + m7masnA[g] -> man[g] + m6masnA[g]	-57134.1	57134.1		N-glycan synthesis	0	0	1000	0	4		NOTES:	PMID:10462544,PMID:11912132
MM7Cag	mannosyl-oligosaccharide 1,2-alpha-mannosidase, Golgi apparatus	h2o[g] + m7masnA[g] -> m6masnC[g] + man[g]	(4121.1) or (57134.1) or (10905.1)	10905.1 4121.1 57134.1		N-glycan synthesis	0	0	1000	0	4		NOTES:	PMID:10215863
MM7Cbg	mannosyl-oligosaccharide 1,2-alpha-mannosidase, Golgi apparatus	h2o[g] + m7masnC[g] -> m6masnC[g] + man[g]	(57134.1) or (10905.1) or (4121.1)	10905.1 4121.1 57134.1		N-glycan synthesis	0	0	1000	0	4	6.4.1.4	NOTES:	PMID:10462544,PMID:11912132
MM8Ag	mannosyl-oligosaccharide 1,2-alpha-mannosidase, Golgi apparatus	h2o[g] + m8masn[g] -> m7masnA[g] + man[g]	(4121.1) or (57134.1) or (10905.1)	10905.1 4121.1 57134.1		N-glycan synthesis	0	0	1000	0	4		NOTES:	PMID:10215863
MM8Cg	mannosyl-oligosaccharide 1,2-alpha-mannosidase, Golgi apparatus	h2o[g] + m8masn[g] -> man[g] + m7masnC[g]	(57134.1) or (10905.1) or (4121.1)	10905.1 4121.1 57134.1		N-glycan synthesis	0	0	1000	0	4	4.1.1.9	NOTES:	PMID:10462544,PMID:11912132
MTAP	5'-methylthioadenosine phosphorylase	pi[c] + 5mta[c] -> ade[c] + 5mdr1p[c]	-4507.1	4507.1		Arginine and Proline Metabolism	0	0	1000	0	4	2.3.3.5	NOTES:	PMID:10462544,PMID:11912132
MTHFC	methenyltetrahydrofolate cyclohydrolase	h2o[c] + methf[c] <=> 10fthf[c] + h[c]	(4522.1) or (100287639.1) or (441024.1)	100287639.1 441024.1 4522.1		Folate metabolism	1	-1000	1000	0	4	2.8.1.2	NOTES:	PMID:10462544
MTHFD	methylenetetrahydrofolate dehydrogenase (NADP)	nadp[c] + mlthf[c] <=> nadph[c] + methf[c]	-4522.1	4522.1		Folate metabolism	1	-1000	1000	0	4	1.1.1.37	NOTES:	PMID:10462544,PMID:11912132
MTHGXLt	Methylglyoxal transport (cytosol to extracellular)	mthgxl[c] -> mthgxl[e]				Transport, extracellular	0	0	1000	0	4	1.1.1.37	NOTES:	PMID:10462544,PMID:11912132
MTRI	5-methylthioribose-1-phosphate isomerase	5mdr1p[c] <=> 5mdru1p[c]				Arginine and Proline Metabolism	1	-1000	1000	0	4		NOTES:	PMID:10462544,PMID:11912132
N3Tg	N-acetylgalactosamine 3-beta-galactosyltransferase, Golgi apparatus	udpgal[g] + Tn_antigen[g] -> h[g] + udp[g] + T_antigen[g]	-56913.1	56913.1		O-glycan synthesis	0	0	1000	0	4	6.2.1.5	NOTES:	PMID:10462544,PMID:11912132
NACHEX23ly	beta-N-acetylhexosaminidase, lysosomal	h2o[l] + ksii_core2_deg4[l] -> acgam[l] + ksii_core2_deg5[l]	(3073.1 and 3074.1) or (3073.1) or (3074.1)	3073.1 3074.1		Keratan sulfate degradation	0	0	1000	0	4	6.2.1.4	NOTES:	PMID:10462544,PMID:11912132
NACHEX24ly	beta-N-acetylhexosaminidase, lysosomal	h2o[l] + ksii_core2_deg7[l] -> acgam[l] + ksii_core2_deg8[l]	(3074.1) or (3073.1) or (3073.1 and 3074.1)	3073.1 3074.1		Keratan sulfate degradation	0	0	1000	0	4		NOTES:	PMID:10462544,PMID:11912132
NACHEX25ly	beta-N-acetylhexosaminidase, lysosomal	h2o[l] + ksii_core2_deg9[l] -> acgam[l] + f1a[l]	(3073.1 and 3074.1) or (3073.1) or (3074.1)	3073.1 3074.1		Keratan sulfate degradation	0	0	1000	0	4		NOTES:	PMID:10462544,PMID:11912132
NACHEX26ly	beta-N-acetylhexosaminidase, lysosomal	2 h2o[l] + ksii_core4_deg4[l] -> 2 acgam[l] + ksii_core2_deg5[l]	(3073.1 and 3074.1) or (3073.1) or (3074.1)	3073.1 3074.1		Keratan sulfate degradation	0	0	1000	0	4		NOTES:	PMID:10462544,PMID:11912132
NACHEX27ly	beta-N-acetylhexosaminidase, lysosomal	h2o[l] + ha_deg1[l] -> acgam[l] + ha_pre1[l]	(3073.1 and 3074.1) or (3073.1) or (3074.1)	3073.1 3074.1		Hyaluronan metabolism	0	0	1000	0	2	2.1.1.13	NOTES:
NACHEX4ly	beta-N-acetylhexosaminidase, lysosomal	h2o[l] + cs_c_deg1[l] -> acgal[l] + cs_c_deg2[l]	(3073.1) or (3073.1 and 3074.1) or (3074.1)	3073.1 3074.1		Chondroitin sulfate degradation	0	0	1000	0	4		NOTES:MM	PMID:5773299
NACHEX5ly	beta-N-acetylhexosaminidase, lysosomal	h2o[l] + cs_c_deg4[l] -> acgal[l] + cs_c_deg5[l]	(3073.1) or (3073.1 and 3074.1) or (3074.1)	3073.1 3074.1		Chondroitin sulfate degradation	0	0	1000	0	4		NOTES:JLR	PMID:12381379,PMID:15016824
NACHEX6ly	beta-N-acetylhexosaminidase, lysosomal	h2o[l] + cs_d_deg1[l] -> acgal[l] + cs_d_deg2[l]	(3073.1 and 3074.1) or (3074.1) or (3073.1)	3073.1 3074.1		Chondroitin sulfate degradation	0	0	1000	0	4	2.7.1.36	NOTES:adenosine deaminase has been found on cell surface in human (Gonzales-Gronow et al, JBC, 2004,279,20993-20998). IT	PMID:12381379,PMID:15016824
NACHEX7ly	beta-N-acetylhexosaminidase, lysosomal	h2o[l] + cs_d_deg5[l] -> acgal[l] + cs_d_deg6[l]	(3073.1 and 3074.1) or (3074.1) or (3073.1)	3073.1 3074.1		Chondroitin sulfate degradation	0	0	1000	0	4	3.2.1.106	NOTES:Deoxyguanosine can also act as acceptor. Possibly identical with EC 2.7.1.74 deoxycytidine kinase.	PMID:6317685
NACHEXA20ly	beta-N-acetylhexosaminidase A, lysosomal	2 h2o[l] + ksii_core2_deg3[l] -> h[l] + acgam[l] + so4[l] + ksii_core2_deg5[l]	(3073.1) or (3073.1 and 3074.1)	3073.1 3074.1		Keratan sulfate degradation	0	0	1000	0	2		NOTES:	PMID:10899995
NACHEXA21ly	beta-N-acetylhexosaminidase A, lysosomal	2 h2o[l] + ksii_core2_deg6[l] -> h[l] + acgam[l] + so4[l] + ksii_core2_deg8[l]	(3073.1) or (3073.1 and 3074.1)	3073.1 3074.1		Keratan sulfate degradation	0	0	1000	0	1		NOTES:
NACHEXA22ly	beta-N-acetylhexosaminidase A, lysosomal	3 h2o[l] + ksii_core4_deg3[l] -> h[l] + 2 acgam[l] + so4[l] + ksii_core2_deg5[l]	(3073.1) or (3073.1 and 3074.1)	3073.1 3074.1		Keratan sulfate degradation	0	0	1000	0	4	4.2.1.18	NOTES:NJ
NACHEXA3ly	beta-N-acetylhexosaminidase A, lysosomal	2 h2o[l] + cs_c[l] -> h[l] + acgal[l] + so4[l] + cs_c_deg2[l]	(3073.1) or (3073.1 and 3074.1)	3073.1 3074.1		Chondroitin sulfate degradation	0	0	1000	0	4	4.2.3.3	NOTES:NJ
NACHEXA4ly	beta-N-acetylhexosaminidase A, lysosomal	2 h2o[l] + cs_c_deg3[l] -> h[l] + acgal[l] + so4[l] + cs_c_deg5[l]	(3073.1) or (3073.1 and 3074.1)	3073.1 3074.1		Chondroitin sulfate degradation	0	0	1000	0	2	4.2.3.3	NOTES:
NACHEXA5ly	beta-N-acetylhexosaminidase A, lysosomal	2 h2o[l] + cs_d[l] -> h[l] + acgal[l] + so4[l] + cs_d_deg2[l]	(3073.1) or (3073.1 and 3074.1)	3073.1 3074.1		Chondroitin sulfate degradation	0	0	1000	0	4	3.1.3.56	NOTES:SAB	PMID:9153402
NACHEXA6ly	beta-N-acetylhexosaminidase A, lysosomal	2 h2o[l] + cs_d_deg4[l] -> h[l] + acgal[l] + so4[l] + cs_d_deg6[l]	(3073.1) or (3073.1 and 3074.1)	3073.1 3074.1		Chondroitin sulfate degradation	0	0	1000	0	2		NOTES:JLR	PMID:11390972,PMID:11959859
NACHEXA7ly	beta-N-acetylhexosaminidase A, lysosomal	3 h2o[l] + cs_e[l] -> 2 h[l] + acgal[l] + 2 so4[l] + cs_e_deg3[l]	(3073.1) or (3073.1 and 3074.1)	3073.1 3074.1		Chondroitin sulfate degradation	0	0	1000	0	4	3.1.3.64	NOTES:JLR SAB lyso	PMID:11390972,PMID:11959859
NACHEXA8ly	beta-N-acetylhexosaminidase A, lysosomal	3 h2o[l] + cs_e_deg4[l] -> 2 h[l] + acgal[l] + 2 so4[l] + cs_e_deg7[l]	(3073.1) or (3073.1 and 3074.1)	3073.1 3074.1		Chondroitin sulfate degradation	0	0	1000	0	1	2.7.1.127	NOTES:SAB
NACUP	Nicotinic acid uptake	nac[e] -> nac[c]				Transport, extracellular	0	0	1000	0	4	3.1.3.56	NOTES:SAB	PMID:8103425,PMID:9153402
NADHtpu	NADH transporter, peroxisome	nadh[c] -> nadh[x]				Transport, peroxisomal	0	0	1000	0	4		NOTES:NCD	PMID:9296457
NADHtru	NADH transporter, endoplasmic reticulum	nadh[c] -> nadh[r]				Transport, endoplasmic reticular	0	0	1000	0	4	3.1.3.25	NOTES:	PMID:11297543
NADN	NAD nucleosidase	h2o[c] + nad[c] -> h[c] + adprib[c] + ncam[c]				NAD metabolism	0	0	1000	0	4	5.5.1.4	NOTES:MM	PMID:12209855,PMID:9820813
NADNe	NAD nucleosidase,extracellular	h2o[e] + nad[e] -> h[e] + adprib[e] + ncam[e]	-952.1	952.1		NAD metabolism	0	0	1000	0	2	3.2.1.113	NOTES:IT
NADPHtru	NADPH transporter, endoplasmic reticulum	nadph[c] -> nadph[r]				Transport, endoplasmic reticular	0	0	1000	0	2	3.2.1.113	NOTES:NJ	PMID:15351645
NADPHtxu	NADPH transporter, peroxisome	nadph[c] -> nadph[x]				Transport, peroxisomal	0	0	1000	0	4	3.2.1.113	NOTES:IT (2.7.1.74)	PMID:265735
NADPNe	NADP nucleosidase,extracellular	h2o[e] + nadp[e] -> h[e] + adprbp[e] + ncam[e]	-952.1	952.1		NAD metabolism	0	0	1000	0	4	3.2.1.113	NOTES:IT (2.7.1.74)	PMID:10387103,PMID:12535661,PMID:9342341
NADPtru	NADP transporter, endoplasmic reticulum	nadp[r] -> nadp[c]				Transport, endoplasmic reticular	0	0	1000	0	4	3.2.1.113	NOTES:IT (2.7.1.74)	PMID:10387103,PMID:12535661,PMID:9342341
NADPtxu	NADP transporter, peroxisome	nadp[x] -> nadp[c]				Transport, peroxisomal	0	0	1000	0	2	3.2.1.113	NOTES:NCD	PMID:7642519,PMID:7685356
NADS2	NAD synthase (glutamine-hydrolysing)	h2o[c] + atp[c] + gln_L[c] + dnad[c] -> h[c] + nad[c] + glu_L[c] + amp[c] + ppi[c]	-55191.1	55191.1		NAD metabolism	0	0	1000	0	2	3.2.1.113	NOTES:interaction between peroxisomes and ER (some enzymes on the outer membrane) NJ
NADtn	NAD transport, nuclear through pores	nad[n] <=> nad[c]				Transport, nuclear	1	-1000	1000	0	4	3.2.1.113	NOTES:NJ
NADtpu	NAD transporter, peroxisome	nadh[x] -> nadh[c]				Transport, peroxisomal	0	0	1000	0	4	2.4.2.28	NOTES:NJ
NADtru	NAD transporter, endoplasmic reticulum	nad[r] -> nad[c]				Transport, endoplasmic reticular	0	0	1000	0	4	3.5.4.9	NOTES:NJ
NAGA2ly	N-acetylgalactosaminidase, alpha-	h[l] + Tn_antigen[l] + udp[l] -> Ser_Thr[l] + udpacgal[l]	-4668.1	4668.1		Keratan sulfate degradation	0	0	1000	0	2	1.5.1.5	NOTES:NJ	PMID:11788354,PMID:12864740
NAGLCAly	N-acetylglucosaminidase, lysosomal	h2o[l] + core6[l] -> acgam[l] + Tn_antigen[l]				Keratan sulfate degradation	0	0	1000	0	4		NOTES:ISOMERASE SAB added EC and adjusted compounds for balance	PMID:8148378
NaKt	Na+/K+ exchanging ATPase	h2o[c] + atp[c] + na1[c] + k[e] -> adp[c] + h[c] + pi[c] + na1[e] + k[c]	(481.1 and 478.1) or (477.1 and 23439.1) or (483.1 and 476.1) or (481.1 and 480.1) or (482.1 and 478.1) or (482.1 and 476.1) or (482.1 and 477.1) or (481.1 and 476.1) or (23439.1 and 476.1) or (480.1 and 23439.1) or (481.1 and 477.1)	23439.1 476.1 477.1 478.1 480.1 481.1 482.1 483.1		Transport, extracellular	0	0	1000	0	2	5.3.1.23	NOTES:IT
NAt3_1	sodium proton antiporter (H:NA is 1:1)	h[e] + na1[c] <=> h[c] + na1[e]	(389015.1) or (6548.1) or (6550.1) or (6549.1) or (6553.1)	389015.1 6548.1 6549.1 6550.1 6553.1		Transport, extracellular	1	-1000	1000	0	2	2.4.1.122	NOTES:	PMID:14744791,PMID:15087440,PMID:7923172,PMID:8001985,PMID:8422236
NAt5	sodium/ammonium proton antiporter	na1[c] + nh4[e] <=> nh4[c] + na1[e]	(6548.1) or (6550.1) or (6549.1)	6548.1 6549.1 6550.1		Transport, extracellular	1	-1000	1000	0	2	3.2.1.52	NOTES:IT	PMID:15087440
NCAMUP	Nicotinamide acid uptake	ncam[e] -> ncam[c]				Transport, extracellular	0	0	1000	0	2	3.2.1.52	NOTES:	PMID:10899995
NDP6	nucleoside-diphosphatase (dCDP)	h2o[c] + dcdp[c] -> h[c] + pi[c] + dcmp[c]				Nucleotide interconversion	0	0	1000	0	2	3.2.1.52	NOTES:IT rxn is done by 4.1.2.14 and 4.1.3.16 mitochondrial isozyme - NCD	PMID:12660328,PMID:14193832,PMID:15849464,PMID:9783918
NDP7g	nucleoside-diphosphatase (UDP), Golgi apparatus	udp[g] + h2o[g] -> h[g] + pi[g] + ump[g]	-9583.1	9583.1		Nucleotide interconversion	0	0	1000	0	4	3.2.1.52	NOTES:electrogenic, Na indepdendent &amp; rev NJ	PMID:12827517,PMID:12883891,PMID:9187257
NDPK1	nucleoside-diphosphate kinase (ATP:GDP)	atp[c] + 3 h[c] + gdp[c] <=> adp[c] + gtp[c]	(4832.1) or (10201.1) or (4831.1 and 4830.1) or (29922.2) or (4831.1 and 4830.2) or (29922.1)	10201.1 29922.1 29922.2 4830.1 4830.2 4831.1 4832.1		Nucleotide interconversion	1	-1000	1000	0	2	3.2.1.52	NOTES:ubiquinone precursor, transport by &quot;diffusion&quot; -&gt; actually beleived to be flip-flop mechanism (PMID: 12840657). NJ	PMID:12840657
NDPK10	nucleoside-diphosphate kinase (ATP:dIDP)	atp[c] + 3 h[c] + didp[c] <=> adp[c] + ditp[c]	(4832.1) or (4831.1 and 4830.1) or (10201.1) or (29922.2) or (29922.1) or (4831.1 and 4830.2)	10201.1 29922.1 29922.2 4830.1 4830.2 4831.1 4832.1		Nucleotide interconversion	1	-1000	1000	0	0	3.2.1.52	NOTES:	PMID:11425794
NDPK10n	nucleoside-diphosphate kinase (ATP:dIDP), nuclear	atp[n] + didp[n] <=> adp[n] + ditp[n]	(4831.1 and 4830.1) or (4830.2 and 4831.1)	4830.1 4830.2 4831.1		Nucleotide interconversion	1	-1000	1000	0	0	3.2.1.52	NOTES:	PMID:11425794
NDPK1m	nucleoside-diphosphate kinase (ATP:GDP), mitochondrial	atp[m] + gdp[m] <=> h[m] + adp[m] + gtp[m]	-4833.1	4833.1		Nucleotide interconversion	1	-1000	1000	0	0	3.2.1.52	NOTES:	PMID:11425794
NDPK2	nucleoside-diphosphate kinase (ATP:UDP)	atp[c] + 3 h[c] + udp[c] <=> adp[c] + utp[c]	(4832.1) or (29922.1) or (4831.1 and 4830.1) or (10201.1) or (4831.1 and 4830.2) or (29922.2)	10201.1 29922.1 29922.2 4830.1 4830.2 4831.1 4832.1		Nucleotide interconversion	1	-1000	1000	0	0	3.2.1.52	NOTES:	PMID:11425794
NDPK2n	nucleoside-diphosphate kinase (ATP:UDP), nuclear	atp[n] + udp[n] <=> utp[n] + adp[n]	(4831.1 and 4830.1) or (4830.2 and 4831.1)	4830.1 4830.2 4831.1		Nucleotide interconversion	1	-1000	1000	0	0		NOTES:	PMID:11425794
NDPK3	nucleoside-diphosphate kinase (ATP:CDP)	atp[c] + 3 h[c] + cdp[c] <=> adp[c] + ctp[c]	(4832.1) or (29922.2) or (4831.1 and 4830.1) or (29922.1) or (10201.1) or (4831.1 and 4830.2)	10201.1 29922.1 29922.2 4830.1 4830.2 4831.1 4832.1		Nucleotide interconversion	1	-1000	1000	0	0		NOTES:	PMID:11425794
NDPK4	nucleoside-diphosphate kinase (ATP:dTDP)	atp[c] + 3 h[c] + dtdp[c] <=> adp[c] + dttp[c]	(4832.1) or (4831.1 and 4830.1) or (10201.1) or (29922.2) or (29922.1) or (4831.1 and 4830.2)	10201.1 29922.1 29922.2 4830.1 4830.2 4831.1 4832.1		Nucleotide interconversion	1	-1000	1000	0	4		NOTES:for homo sapiens, noted to actually be NADH-cyt b5, using NADH at present NJ	PMID:14967823
NDPK4m	nucleoside-diphosphate kinase (ATP:dTDP), mitochondrial	atp[m] + dtdp[m] -> h[m] + adp[m] + dttp[m]	-4833.1	4833.1		Nucleotide interconversion	0	0	1000	0	4		NOTES:for homo sapiens, noted to actually be NADH-cyt b5, using NADH at present NJ
NDPK4n	nucleoside-diphosphate kinase (ATP:dTDP), nuclear	atp[n] + dtdp[n] <=> adp[n] + dttp[n]	(4831.1 and 4830.1) or (4830.2 and 4831.1)	4830.1 4830.2 4831.1		Nucleotide interconversion	1	-1000	1000	0	4		NOTES:for homo sapiens, noted to actually be NADH-cyt b5, using NADH at present NJ	PMID:14967823
NDPK5	Nucleoside-diphosphate kinase (ATP:dGDP)	atp[c] + 3 h[c] + dgdp[c] <=> adp[c] + dgtp[c]	(4832.1) or (4831.1 and 4830.2) or (10201.1) or (29922.2) or (29922.1) or (4831.1 and 4830.1)	10201.1 29922.1 29922.2 4830.1 4830.2 4831.1 4832.1		Nucleotide interconversion	1	-1000	1000	0	4		NOTES:for homo sapiens, noted to actually be NADH-cyt b5, using NADH at present NJ	PMID:14967823
NDPK5m	nucleoside-diphosphate kinase (ATP:dGDP), mitochondrial	atp[m] + dgdp[m] -> h[m] + adp[m] + dgtp[m]	-4833.1	4833.1		Nucleotide interconversion	0	0	1000	0	4		NOTES:for homo sapiens, noted to actually be NADH-cyt b5, using NADH at present NJ	PMID:14967823
NDPK6	Nucleoside-diphosphate kinase (ATP:dUDP)	atp[c] + 3 h[c] + dudp[c] <=> adp[c] + dutp[c]	(4832.1) or (4831.1 and 4830.1) or (10201.1) or (29922.2) or (29922.1) or (4831.1 and 4830.2)	10201.1 29922.1 29922.2 4830.1 4830.2 4831.1 4832.1		Nucleotide interconversion	1	-1000	1000	0	4		NOTES:for homo sapiens, noted to actually be NADH-cyt b5, using NADH at present NJ
NDPK6m	nucleoside-diphosphate kinase (ATP:dUDP), mitochondrial	atp[m] + dudp[m] <=> h[m] + adp[m] + dutp[m]	-4833.1	4833.1		Nucleotide interconversion	1	-1	1	0	4		NOTES:for homo sapiens, noted to actually be NADH-cyt b5, using NADH at present NJ
NDPK6n	nucleoside-diphosphate kinase (ATP:dUDP), nuclear	atp[n] + dudp[n] <=> adp[n] + dutp[n]	(4831.1 and 4830.1) or (4830.2 and 4831.1)	4830.1 4830.2 4831.1		Nucleotide interconversion	1	-1000	1000	0	4		NOTES:for homo sapiens, noted to actually be NADH-cyt b5, using NADH at present NJ
NDPK7	nucleoside-diphosphate kinase (ATP:dCDP)	atp[c] + 3 h[c] + dcdp[c] <=> adp[c] + dctp[c]	(4832.1) or (4831.1 and 4830.1) or (10201.1) or (29922.2) or (29922.1) or (4831.1 and 4830.2)	10201.1 29922.1 29922.2 4830.1 4830.2 4831.1 4832.1		Nucleotide interconversion	1	-1000	1000	0	4		NOTES:for homo sapiens, noted to actually be NADH-cyt b5, using NADH at present NJ
NDPK8	Nucleoside-diphosphate kinase (ATP:dADP)	atp[c] + 3 h[c] + dadp[c] <=> adp[c] + datp[c]	(4832.1) or (4831.1 and 4830.1) or (10201.1) or (29922.2) or (29922.1) or (4831.1 and 4830.2)	10201.1 29922.1 29922.2 4830.1 4830.2 4831.1 4832.1		Nucleotide interconversion	1	-1000	1000	0	4		NOTES:for homo sapiens, noted to actually be NADH-cyt b5, using NADH at present NJ
NDPK8m	nucleoside-diphosphate kinase (ATP:dADP), mitochondrial	atp[m] + dadp[m] -> h[m] + adp[m] + datp[m]	-4833.1	4833.1		Nucleotide interconversion	0	0	1000	0	4	3.2.2.5	NOTES:for homo sapiens, noted to actually be NADH-cyt b5, using NADH at present NJ
NDPK8n	nucleoside-diphosphate kinase (ATP:dADP), nuclear	atp[n] + dadp[n] <=> datp[n] + adp[n]	(4831.1 and 4830.1) or (4830.2 and 4831.1)	4830.1 4830.2 4831.1		Nucleotide interconversion	1	-1000	1000	0	4	3.2.2.5	NOTES:
NDPK9	nucleoside-diphosphate kinase (ATP:IDP)	atp[c] + 3 h[c] + idp[c] <=> adp[c] + itp[c]	(4832.1) or (4831.1 and 4830.1) or (10201.1) or (29922.2) or (29922.1) or (4831.1 and 4830.2)	10201.1 29922.1 29922.2 4830.1 4830.2 4831.1 4832.1		Nucleotide interconversion	1	-1000	1000	0	4		NOTES:
NDPK9n	nucleoside-diphosphate kinase (ATP:IDP), nuclear	atp[n] + idp[n] <=> adp[n] + itp[n]	(4831.1 and 4830.1) or (4830.2 and 4831.1)	4830.1 4830.2 4831.1		Nucleotide interconversion	1	-1000	1000	0	4		NOTES:for homo sapiens, noted to actually be NADH-cyt b5, using NADH at present NJ
NICRNS	NICRNS	atp[c] + 2 h[c] + nicrns[c] -> adp[c] + nicrnt[c]				NAD metabolism	0	0	1000	0	4	3.2.2.6	NOTES:FULLR corresponds to acyl/R groups in texts. NJ	PMID:11481335
NICRNTtn	NICRNT transport, nuclear trhough pore	nicrnt[c] <=> nicrnt[n]				Transport, nuclear	1	-1000	1000	0	1		NOTES:unknown mechanism, however bile acids need to be secreted out of the cell NJ
NMNATn	nicotinamide-nucleotide adenylyltransferase	atp[n] + h[n] + nmn[n] -> ppi[n] + nad[n]	-64802.1	64802.1		NAD metabolism	0	0	1000	0	2		NOTES:unknown mechanism, however bile acids need to be secreted out of the cell NJ
NMNS	NMN synthetase	h[c] + prpp[c] + ncam[c] -> ppi[c] + nmn[c]				NAD metabolism	0	0	1000	0	4		NOTES:
NMNtn	NMN transport, nuclear trhough pore	nmn[c] <=> nmn[n]				Transport, nuclear	1	-1000	1000	0	2		NOTES:Added EC- JLR IT
NNATn	nicotinate-nucleotide adenylyltransferase	atp[n] + h[n] + nicrnt[n] -> ppi[n] + dnad[n]	-64802.1	64802.1		NAD metabolism	0	0	1000	0	4		NOTES:	PMID:12535661,PMID:8692979
NOt	NO transport (diffusion)	no[e] <=> no[c]				Transport, extracellular	1	-1000	1000	0	2		NOTES:	PMID:10899995
NP1	nucleotide phosphatase	h[c] + nac[c] + r1p[c] -> pi[c] + nicrns[c]	-4860.1	4860.1		NAD metabolism	0	0	1000	0	2	3.2.1.49	NOTES:	PMID:3696164
NRPPHRSFt	norepinephrine sulfate transport (diffusion)	nrpphrsf[c] -> nrpphrsf[e]				Transport, extracellular	0	0	1000	0	2		NOTES:IT
NRPPHRSULT	Norepinephrine Sulfotransferase	paps[c] + nrpphr[c] -> h[c] + pap[c] + nrpphrsf[c]	(6818.1) or (6818.3) or (6818.2)	6818.1 6818.2 6818.3		Tyrosine metabolism	0	0	1000	0	2	3.6.3.9	NOTES:NCD	PMID:6821187
NRVNCCOAtx	fatty acid intracellular transport	nrvnccoa[c] <=> nrvnccoa[x]				Transport, peroxisomal	1	-1000	1000	0	4		NOTES:NCD	PMID:10421229,PMID:12750891,PMID:15705056,PMID:2656669,PMID:3170580,PMID:8504756,PMID:9230074
NRVNCt	fatty acid transport via diffusion	nrvnc[e] <=> nrvnc[c]				Transport, extracellular	1	-1000	1000	0	4		NOTES:NJ	PMID:9459311
NT5C	Nicotinate D-ribonucleotide phosphohydrolase	h2o[c] + nicrnt[c] -> pi[c] + nicrns[c]	-22978.1	22978.1		NAD metabolism	0	0	1000	0	4		NOTES:NJ	PMID:9459311
NTD1	5'-nucleotidase (dUMP)	h2o[c] + dump[c] -> pi[c] + duri[c]	-30833.1	30833.1		Pyrimidine catabolism	0	0	1000	0	2	3.6.1.6	NOTES:cholesterol precursor, transport by &quot;diffusion&quot; -&gt; actually beleived to be flip-flop mechanism (PMID: 12840657). NJ	PMID:12840657
NTD10	5'-nucleotidase (XMP)	h2o[c] + xmp[c] -> pi[c] + xtsn[c]	-22978.1	22978.1		Nucleotide interconversion	0	0	1000	0	4	3.6.1.6	NOTES:lanosterol -&gt; cholesterol pathway FAD known to be cofactor, other details missing NJ	PMID:17984220,PMID:19520779,PMID:19520780
NTD11	5'-nucleotidase (IMP)	h2o[c] + imp[c] -> pi[c] + ins[c]	(22978.1) or (93034.2) or (93034.1)	22978.1 93034.1 93034.2		Purine catabolism	0	0	1000	0	4		NOTES:lanosterol -&gt; cholesterol pathway FAD known to be cofactor, other details missing NJ	PMID:17984220,PMID:19520779,PMID:19520780
NTD3	5'-nucleotidase (dCMP)	h2o[c] + dcmp[c] -> pi[c] + dcyt[c]	(93034.1) or (30833.1) or (93034.2)	30833.1 93034.1 93034.2		Pyrimidine catabolism	0	0	1000	0	4	2.7.4.6	NOTES:lanosterol -&gt; cholesterol pathway FAD known to be cofactor, other details missing NJ	PMID:17984220,PMID:19520779,PMID:19520780
NTD5	5'-nucleotidase (dTMP)	h2o[c] + dtmp[c] -> pi[c] + thymd[c]	-30833.1	30833.1		Pyrimidine catabolism	0	0	1000	0	4	2.7.4.6	NOTES:lanosterol -&gt; cholesterol pathway see paper refs Moebius et al PNAS 95:1899-1902 - check/re-check lit for more specific details (NADPH known to be cofactor - also NADH?, possibly rev?) NJ	PMID:9465114
NTD6	5'-nucleotidase (dAMP)	h2o[c] + damp[c] -> pi[c] + dad_2[c]	-22978.1	22978.1		Nucleotide interconversion	0	0	1000	0	4	2.7.4.6	NOTES:lanosterol -&gt; cholesterol pathway see paper refs Moebius et al PNAS 95:1899-1902 - check/re-check lit for more specific details (NADPH known to be cofactor - also NADH?, possibly rev?) NJ	PMID:15670717
NTD7	5'-nucleotidase (AMP)	h2o[c] + amp[c] -> pi[c] + adn[c]	(22978.1) or (93034.2) or (93034.1)	22978.1 93034.1 93034.2		Nucleotide interconversion	0	0	1000	0	4		NOTES:NJ	PMID:9188692
NTD8	5'-nucleotidase (dGMP)	h2o[c] + dgmp[c] -> pi[c] + dgsn[c]	(22978.1) or (30833.1)	22978.1 30833.1		Nucleotide interconversion	0	0	1000	0	4	2.7.4.6	NOTES:NJ	PMID:9188692
NTD9	5'-nucleotidase (GMP)	h2o[c] + gmp[c] -> pi[c] + gsn[c]	-22978.1	22978.1		Nucleotide interconversion	0	0	1000	0	4		NOTES:Used to make Ubiquinone-10 EC 2.1.1.114 IT	PMID:10777520,PMID:1965190,PMID:7380842
O2St	superoxide anion transport via diffusion (extracellular)	o2s[c] <=> o2s[e]				Transport, extracellular	1	-1000	1000	0	4		NOTES:NJ	PMID:12507753,PMID:9007731,PMID:9334206
O2Stm	superoxide anion transport via diffusion (mitochondria)	o2s[c] <=> o2s[m]				Transport, mitochondrial	1	-1000	1000	0	1	2.7.4.6	NOTES:specific mechanism not known NJ
O2Stn	superoxide anion transport via diffusion (nucleus)	o2s[c] <=> o2s[n]				Transport, nuclear	1	-1000	1000	0	4	2.7.4.6	NOTES:NJ	PMID:11535246,PMID:1588921
O2Stx	superoxide anion transport via diffusion (peroxisome)	o2s[c] <=> o2s[x]				Transport, peroxisomal	1	-1000	1000	0	1		NOTES:	PMID:11535246,PMID:1588921
O2t	o2 transport (diffusion)	o2[e] <=> o2[c]				Transport, extracellular	1	-1000	1000	0	2	2.7.4.6	NOTES:	PMID:6504041
O2ter	O2 transport, endoplasmic reticulum	o2[c] <=> o2[r]				Transport, endoplasmic reticular	1	-1000	1000	0	2		NOTES:NCD,IT	PMID:11375437
O2tm	O2 transport (diffusion)	o2[c] <=> o2[m]				Transport, mitochondrial	1	-1000	1000	0	2	2.7.4.6	NOTES:NCD	PMID:11375437
O2tn	O2 nuclear transport	o2[c] <=> o2[n]				Transport, nuclear	1	-1000	1000	0	4	2.7.4.6	NOTES:_06-15-05 - EC 1.3.3.1 IT based on Bader et al, 1998, Prot. Expr. Purif,., 13,414-422 (I guess it is ubiquinone but i am not sure ) (needs FMN as cofactor) v(enzyme is located in inner-membrane of mitochondria, reaction take place in cytosol (Fig. 8 Rawls et al PMID: 10727948 )	PMID:10727948,PMID:9693067
O2tp	O2 transport, peroxisomal	o2[c] <=> o2[x]				Transport, peroxisomal	1	-1000	1000	0	4		NOTES:	PMID:2565865,PMID:8619816
OBDHc	2-Oxobutanoate dehydrogenase, cytosolic	nad[c] + 2obut[c] + coa[c] -> nadh[c] + co2[c] + ppcoa[c]				Glycine, serine, alanine and threonine metabolism	0	0	1000	0	4		NOTES:	PMID:8973361
OCCOAtm	Octanoyl-CoA transport, diffusion	occoa[c] -> occoa[m]				Transport, mitochondrial	0	0	1000	0	2	2.7.4.6	NOTES:Also acts on dihydrothymine and hydantoin. Found not specific evidence in PubMed, but Dihydropyrimidinase is supposed to be in cytosol and catalyze this reaction. Old information
OCCOAtx	fatty acid intracellular transport	occoa[c] <=> occoa[x]				Transport, peroxisomal	1	-1000	1000	0	4	2.7.4.6	NOTES:	PMID:10727395
OCDCAtr	fatty acid transport via diffusion	ocdca[e] <=> ocdca[c]				Transport, extracellular	1	-1000	1000	0	2	2.7.4.6	NOTES:IT	PMID:3735413
OCDCEAtr	fatty acid transport via diffusion	ocdcea[e] <=> ocdcea[c]				Transport, extracellular	1	-1000	1000	0	2	2.7.4.6	NOTES:NCD
OCOAT1m	3-oxoacid CoA-transferase	acac[m] + succoa[m] -> aacoa[m] + succ[m]	(5019.1) or (64064.1)	5019.1 64064.1		Valine, leucine, and isoleucine metabolism	0	0	1000	0	1		NOTES:unknown mechanism for transport - intracellular transport occurs, most details are unknown - see for example Varki glycobiology text or numerous reviews (PMID: 8206147) - extracellular transport is also made available since metabolites can get to outer plasma membrane NJ	PMID:8206147
ORETNF	4-oxo-retinoic acid formation (oxidation)	o2[c] + 2 retn[c] -> 2 oretn[c]				Vitamin A metabolism	0	0	1000	0	1		NOTES:unknown mechanism for transport - intracellular transport occurs, most details are unknown - see for example Varki glycobiology text or numerous reviews (PMID: 8206147) NJ	PMID:8206147
ORETNF2	13-cis-4-oxo-retinoic acid formation (oxidation)	o2[c] + 2 13_cis_retn[c] -> 2 13_cis_oretn[c]				Vitamin A metabolism	0	0	1000	0	1	2.7.7.1	NOTES:unknown mechanism for transport - however must get to other intracellular compartments (e.g. lysosome for degradation) NJ
ORETNtn	4-oxo-retinoic acid transport, Nuclear	oretn[c] <=> oretn[n]				Transport, nuclear	1	-1000	1000	0	1		NOTES:unknown mechanism for transport - however must get to other intracellular compartments (e.g. lysosome for degradation) NJ
ORETNtn2	13-cis-4-oxo-retinoic acid transport, Nuclear	13_cis_oretn[c] <=> 13_cis_oretn[n]				Transport, nuclear	1	-1000	1000	0	2		NOTES:	PMID:10899995
ORNDC	Ornithine Decarboxylase	h[c] + orn[c] -> co2[c] + ptrc[c]	-4953.1	4953.1		Urea cycle	0	0	1000	0	2	2.7.7.18	NOTES:NCD
ORNt3m	ornithine mitochondrial transport via proton antiport	h[c] + orn[m] <=> h[m] + orn[c]	(83884.1) or (10166.1)	10166.1 83884.1		Transport, mitochondrial	1	-1000	1000	0	2		NOTES:JLR- based on B. subtilis and K. pneumoniae reactions (not sure about the h2o and h)	PMID:2543672
ORNt4m	ornithine mitochondrial transport exchange with citruline	h[c] + orn[m] + citr_L[c] <=> h[m] + orn[c] + citr_L[m]	(10166.1) or (83884.1)	10166.1 83884.1		Transport, mitochondrial	1	-1000	1000	0	4	3.4.2.1	NOTES:JLR	PMID:10493836,PMID:10510291,PMID:11101640,PMID:12739169,PMID:7835905,PMID:8476015,PMID:9425115,PMID:9508842,PMID:9649795,PMID:9786900,PMID:9824713
ORNTArm	ornithine transaminase reversible (m)	akg[m] + orn[m] <=> glu_L[m] + glu5sa[m]	-4942.1	4942.1		Urea cycle	1	-1000	1000	0	0		NOTES:NCD
ORNtiDF	ornithine transport via diffusion (extracellular to cytosol)	orn[e] -> orn[c]	(6542.1) or (6541.1) or (84889.1)	6541.1 6542.1 84889.1		Transport, extracellular	0	0	1000	0	4	2.8.2.1	NOTES:NJ
PAFH	Platelet-activating factor acetylhydrolase	h2o[c] + paf_hs[c] -> h[c] + ac[c] + ak2lgchol_hs[c]	(5051.1) or (5049.1 and 5050.1) or (5049.1 and 5050.1 and 5048.1)	5048.1 5049.1 5050.1 5051.1		Glycerophospholipid metabolism	0	0	1000	0	4		NOTES:NJ
PAFS	alkyl glycerol phosphocholine acetyl transferase	accoa[c] + ak2lgchol_hs[c] -> coa[c] + paf_hs[c]				Glycerophospholipid metabolism	0	0	1000	0	4		NOTES:NJ
PAFt	1-alkyl 2-acteylglycerol 3-phosphocholine transport	paf_hs[e] <=> paf_hs[c]				Transport, extracellular	1	-1000	1000	0	2	3.1.3.5	NOTES:NJ	PMID:11788354,PMID:12864740
PAIL_HStn	phosphatidylinositol nuclear transport (diffusion)	pail_hs[c] <=> pail_hs[n]				Transport, nuclear	1	-1000	1000	0	0	3.1.3.5	NOTES:
PAIL45P_HStn	phosphatidylinositol 4,5-bisphosphate nuclear transport (diffusion)	pail45p_hs[c] <=> pail45p_hs[n]				Transport, nuclear	1	-1000	1000	0	0	3.1.3.5	NOTES:
PAIL4P_HStn	phosphatidylinositol 4-phosphate nuclear transport (diffusion)	pail4p_hs[c] <=> pail4p_hs[n]				Transport, nuclear	1	-1000	1000	0	0	3.1.3.5	NOTES:
PAN4PP	phosphatase (pan4p)	h2o[c] + pan4p[c] -> pi[c] + ptth[c]				CoA catabolism	0	0	1000	0	0	3.1.3.5	NOTES:
PAPStg	3'-Phosphoadenylyl sufate Golgi transport	paps[c] <=> paps[g]	-347734	347734		Transport, golgi apparatus	1	-1000	1000	0	0	3.1.3.5	NOTES:
PAPtg	adenosine 3',5'-bisphosphate Golgi transport	pap[g] -> pap[c]				Transport, golgi apparatus	0	0	1000	0	0	3.1.3.5	NOTES:
PCFLOPm	phosphatidylcholine flippase	h2o[c] + atp[c] + pchol_hs[m] -> adp[c] + h[c] + pi[c] + pchol_hs[c]	-57194.1	57194.1		Transport, mitochondrial	0	0	1000	0	0	3.1.3.5	NOTES:
PCHOL_HSter	phosphatidylcholine scramblase	pchol_hs[c] <=> pchol_hs[r]				Transport, endoplasmic reticular	1	-1000	1000	0	0	3.1.3.5	NOTES:
PCHOLP_hs	choline phosphatase	h2o[c] + pchol_hs[c] -> h[c] + pa_hs[c] + chol[c]	-5338.1	5338.1		Glycerophospholipid metabolism	0	0	1000	0	0	3.1.3.5	NOTES:
PCRNtc	transport into the cytosol from peroxisome (carnitine)	pcrn[x] -> pcrn[c]				Fatty acid oxidation	0	0	1000	0	0		NOTES:
PCRNtm	transport into the mitochondria from cytosol (carnitine)	pcrn[c] -> pcrn[m]				Fatty acid oxidation	0	0	1000	0	0		NOTES:
PDE1	3',5'-cyclic-nucleotide phosphodiesterase	h2o[c] + camp[c] -> h[c] + amp[c]	(5139.1) or (5142.1) or (5151.3) or (5153.1) or (5150.2) or (5143.1) or (5150.1) or (5137.1) or (5144.1) or (5136.2) or (5140.2) or (5151.2) or (10846.1) or (5151.5) or (5140.1) or (5141.1) or (5138.1) or (5136.1) or (5151.4) or (5151.1) or (27115.1) or (50940.1) or (8622.1)	10846.1 27115.1 50940.1 5136.1 5136.2 5137.1 5138.1 5139.1 5140.1 5140.2 5141.1 5142.1 5143.1 5144.1 5150.1 5150.2 5151.1 5151.2 5151.3 5151.4 5151.5 5153.1 8622.1		Nucleotide interconversion	0	0	1000	0	0		NOTES:
PDX5PO	pyridoxine 5'-phosphate oxidase	o2[c] + pdx5p[c] -> h2o2[c] + pydx5p[c]	-55163.1	55163.1		Vitamin B6 metabolism	0	0	1000	0	0		NOTES:
PDXPP	Pyridoxine 5-phosphate phosphatase	h2o[c] + pdx5p[c] -> pi[c] + pydxn[c]	-57026.1	57026.1		Vitamin B6 metabolism	0	0	1000	0	0		NOTES:
PE_HSter	phosphatidylethanolamine scramblase	pe_hs[c] <=> pe_hs[r]				Transport, endoplasmic reticular	1	-1000	1000	0	0		NOTES:
PE_HStm	phosphatidylethanolamine scramblase	pe_hs[c] <=> pe_hs[m]				Transport, mitochondrial	1	-1000	1000	0	0		NOTES:
PEFLIP	phosphatidylethanolamine flippase	h2o[c] + atp[c] + pe_hs[e] -> adp[c] + h[c] + pi[c] + pe_hs[c]	(10396.1) or (57194.1)	10396.1 57194.1		Transport, extracellular	0	0	1000	0	0		NOTES:
PEFLIPm	phosphatidylethanolamine flippase	h2o[c] + atp[c] + pe_hs[c] -> adp[c] + h[c] + pi[c] + pe_hs[m]	(10396.1) or (57194.1)	10396.1 57194.1		Transport, mitochondrial	0	0	1000	0	0		NOTES:
PEt	phosphatidylethanolamine transport	pe_hs[e] <=> pe_hs[c]				Transport, extracellular	1	-1000	1000	0	0	1.2.7.2	NOTES:
PETOHMm_hs	phosphatidylethanolamine N-methyltransferase	3 amet[m] + pe_hs[m] -> 3 h[m] + 3 ahcys[m] + pchol_hs[m]	(10400.2) or (10400.1) or (10400.3)	10400.1 10400.2 10400.3		Glycerophospholipid metabolism	0	0	1000	0	0		NOTES:
PETOHMr_hs	phosphatidylethanolamine N-methyltransferase	3 amet[r] + pe_hs[r] -> 3 ahcys[r] + 3 h[r] + pchol_hs[r]	(10400.2) or (10400.1) or (10400.3)	10400.1 10400.2 10400.3		Glycerophospholipid metabolism	0	0	1000	0	0		NOTES:
PFK	phosphofructokinase	atp[c] + 2 h[c] + f6p[c] -> adp[c] + fdp[c]	(5214.1) or (5211.2) or (5214.1 and 5211.1) or (5214.1 and 5213.1) or (5213.1) or (5214.1 and 5211.2) or (5211.1) or (5211.1 and 5213.1) or (5213.1 and 5211.2)	5211.1 5211.2 5213.1 5214.1		Glycolysis/gluconeogenesis	0	0	1.048	0	0		NOTES:
PFK26	6-phosphofructo-2-kinase	atp[c] + 2 h[c] + f6p[c] -> adp[c] + f26bp[c]	(5210.1) or (5207.1) or (5209.1) or (5208.1)	5207.1 5208.1 5209.1 5210.1		Fructose and mannose metabolism	0	0	1000	0	0		NOTES:
PGK	phosphoglycerate kinase	atp[c] + 3 h[c] + 3pg[c] <=> adp[c] + 13dpg[c]	(5230.1) or (375056.1) or (5232.1)	375056.1 5230.1 5232.1		Glycolysis/gluconeogenesis	1	-1000	1000	0	0	2.8.3.5	NOTES:
PGL	6-phosphogluconolactonase	h2o[c] + 6pgl[c] -> h[c] + 6pgc[c]	-25796.1	25796.1		Pentose phosphate pathway	0	0	1000	0	0		NOTES:
PGLer	6-phosphogluconolactonase, endoplasmic reticulum	h2o[r] + 6pgl[r] -> h[r] + 6pgc[r]	-9563.1	9563.1		Pentose phosphate pathway	0	0	1000	0	0		NOTES:
PGLYCt	phosphatidylglycerol transport	pglyc_hs[e] <=> pglyc_hs[c]				Transport, extracellular	1	-1000	1000	0	0		NOTES:
PGM	phosphoglycerate mutase	2pg[c] <=> 3pg[c]	(669.1) or (5223.1) or (5224.2) or (5224.1) or (669.2)	5223.1 5224.1 5224.2 669.1 669.2		Glycolysis/gluconeogenesis	1	-1000	1000	0	0		NOTES:
PGMT	phosphoglucomutase	g1p[c] <=> g6p[c]	(5236.1) or (55276.1)	5236.1 55276.1		Glycolysis/gluconeogenesis	1	-1000	1000	0	0	4.1.1.17	NOTES:
PGPP_hs	Phosphatidylglycerol phosphate phosphatase (homo sapiens)	h2o[c] + pgp_hs[c] -> pi[c] + pglyc_hs[c]				Glycerophospholipid metabolism	0	0	1000	0	0		NOTES:
PGPPT	phosphatidyl-CMP: glycerophosphate phosphatidyltransferase	cdpdag_hs[c] + glyc3p[c] -> h[c] + cmp[c] + pgp_hs[c]	-9489.1	9489.1		Glycerophospholipid metabolism	0	0	1000	0	0		NOTES:
PHEMEt	heme transport	pheme[e] -> pheme[c]	-113235	113235		Transport, extracellular	0	0	1000	0	0	2.6.1.13	NOTES:
PHEt4	L-phenylalanine transport in via sodium symport	na1[e] + phe_L[e] -> na1[c] + phe_L[c]	(54407.1) or (84889.1) or (11254.1) or (6542.1) or (81539.1) or (6541.1) or (55089.1)	11254.1 54407.1 55089.1 6541.1 6542.1 81539.1 84889.1		Transport, extracellular	0	0	1000	0	0		NOTES:
PHYQt	Phylloquinone transport	h2o[c] + atp[c] + phyQ[e] -> adp[c] + h[c] + pi[c] + phyQ[c]				Transport, extracellular	0	0	1000	0	0	3.1.1.47	NOTES:
PI345P3P	phosphatidylinositol-3,4,5-trisphosphate 3-phosphatase	h2o[c] + pail345p_hs[c] -> pi[c] + pail45p_hs[c]	-5728.1	5728.1		Inositol phosphate metabolism	0	0	1000	0	0		NOTES:
PI345P3Pn	phosphatidylinositol-3,4,5-trisphosphate 3-phosphatase, nuclear	h2o[n] + pail345p_hs[n] -> pail45p_hs[n] + pi[n]	-5728.1	5728.1		Inositol phosphate metabolism	0	0	1000	0	0		NOTES:
PI345P5P	phosphatidylinositol-3,4,5-trisphosphate 5-phosphatase	h2o[c] + pail345p_hs[c] -> pi[c] + pail34p_hs[c]	(3633.1) or (27124.1) or (3635.1) or (3636.1) or (8871.1) or (56623.1) or (8867.2) or (27124.2) or (8867.1) or (3632.1)	27124.1 27124.2 3632.1 3633.1 3635.1 3636.1 56623.1 8867.1 8867.2 8871.1		Inositol phosphate metabolism	0	0	1000	0	0		NOTES:
PI345P5Pn	phosphatidylinositol-3,4,5-trisphosphate 5-phosphatase, nuclear	h2o[n] + pail345p_hs[n] -> pi[n] + pail34p_hs[n]				Inositol phosphate metabolism	0	0	1000	0	2		NOTES:unknown mechanism, related cyp P450 metabolism reactions NJ
PI34P3Pn	phosphatidylinositol-3,4-bisphosphate 3-phosphatase, nuclear	h2o[n] + pail34p_hs[n] -> pail4p_hs[n] + pi[n]				Inositol phosphate metabolism	0	0	1000	0	2		NOTES:Human Y/N: Y	PMID:17477828,PMID:17477829
PI34P4Pn	phosphatidylinositol-3,4-bisphosphate 4-phosphatase, nuclear	h2o[n] + pail34p_hs[n] -> pi[n] + pail3p_hs[n]				Inositol phosphate metabolism	0	0	1000	0	4		NOTES:peroxisomal version - NJ	PMID:8188698
PI34P5K	phosphatidylinositol 3,4-bisphosphate 5-kinase	atp[c] + 2 h[c] + pail34p_hs[c] -> adp[c] + pail345p_hs[c]	(8394.1) or (23396.1) or (8395.1)	23396.1 8394.1 8395.1		Inositol phosphate metabolism	0	0	1000	0	4		NOTES:MM	PMID:10767172,PMID:1123190
PI34P5Kn	phosphatidylinositol 3,4-bisphosphate 5-kinase, nuclear	atp[n] + pail34p_hs[n] -> h[n] + adp[n] + pail345p_hs[n]				Inositol phosphate metabolism	0	0	1000	0	2		NOTES:MM
PI3P3Pn	phosphatidylinositol-3-phosphate 3-phosphatase, nuclear	h2o[n] + pail3p_hs[n] -> pail_hs[n] + pi[n]				Inositol phosphate metabolism	0	0	1000	0	2	3.6.3.1	NOTES:made reversible since Keq ~ 0.6. dmhptcoa is a special case because its biochemical fate has not be elucidated. NJ	PMID:9819701
PI3P4K	phosphatidylinositol 3-phosphate 4-kinase	atp[c] + 2 h[c] + pail3p_hs[c] -> adp[c] + pail34p_hs[c]	(55361.1) or (5297.1) or (8394.1) or (23396.1) or (8395.1) or (5298.1)	23396.1 5297.1 5298.1 55361.1 8394.1 8395.1		Inositol phosphate metabolism	0	0	1000	0	2		NOTES:made reversible since Keq ~ 0.6. dmhptcoa is a special case because its biochemical fate has not be elucidated. NJ	PMID:9819701
PI3P4Kn	phosphatidylinositol 3-phosphate 4-kinase, nuclear	atp[n] + pail3p_hs[n] -> h[n] + adp[n] + pail34p_hs[n]				Inositol phosphate metabolism	0	0	1000	0	1	3.1.4.4	NOTES:dmhptcoa is &apos;special&apos; because its biochemical fat isn&apos;t known NJ
PI3P5K	phosphatidylinositol 3-phosphate 5-kinase	atp[c] + 2 h[c] + pail3p_hs[c] -> adp[c] + pail35p_hs[c]	(8394.1) or (23396.1) or (8395.1)	23396.1 8394.1 8395.1		Inositol phosphate metabolism	0	0	1000	0	2		NOTES:unknown mechanism for transport -see PMID 9299016, identifies 2,6-dimethylheptanoyl carnitine in the urine! NJ	PMID:9299016,PMID:9819701
PI45P3K	phosphatidylinositol 4,5-bisphosphate 3-kinase	atp[c] + 2 h[c] + pail45p_hs[c] -> adp[c] + pail345p_hs[c]	(5291.1 and 5295.3) or (5293.1 and 8503.1) or (5296.1 and 5290.1) or (5293.1 and 5295.1) or (5293.1 and 5295.3) or (5291.1 and 5295.1) or (5296.1 and 5291.1) or (5295.2 and 5290.1) or (10870.1 and 5294.1) or (23533.1 and 5294.1) or (5295.2 and 5293.1) or (5290.1 and 5295.1) or (5290.1 and 8503.1) or (5290.1 and 5295.3) or (5291.1 and 8503.1) or (5293.1 and 5296.1) or (5295.2 and 5291.1)	10870.1 23533.1 5290.1 5291.1 5293.1 5294.1 5295.1 5295.2 5295.3 5296.1 8503.1		Inositol phosphate metabolism	0	0	1000	0	2		NOTES:	PMID:9299016,PMID:9819701
PI45P3Kn	phosphatidylinositol 4,5-bisphosphate 3-kinase, nuclear	atp[n] + pail45p_hs[n] -> h[n] + adp[n] + pail345p_hs[n]				Inositol phosphate metabolism	0	0	1000	0	2	3.1.4.17	NOTES:	PMID:9299016,PMID:9819701
PI45P4P	phosphatidylinositol-4,5-bisphosphate 4-phosphatase	h2o[c] + pail45p_hs[c] -> pi[c] + pail5p_hs[c]				Inositol phosphate metabolism	0	0	1000	0	2	1.4.3.5	NOTES:	PMID:9299016,PMID:9819701
PI45P5P	phosphatidylinositol-4,5-bisphosphate 5-phosphatase	h2o[c] + pail45p_hs[c] -> pi[c] + pail4p_hs[c]	(8867.1) or (56623.1) or (4952.1) or (8871.1) or (8867.2) or (4952.2) or (3633.1)	3633.1 4952.1 4952.2 56623.1 8867.1 8867.2 8871.1		Inositol phosphate metabolism	0	0	1000	0	2		NOTES:it
PI45P5Pn	phosphatidylinositol-4,5-bisphosphate 5-phosphatase, nuclear	h2o[n] + pail45p_hs[n] -> pail4p_hs[n] + pi[n]				Inositol phosphate metabolism	0	0	1000	0	4		NOTES:	PMID:1594447
PI45PLC	phosphatidylinositol 4,5-bisphosphate phospholipase C	h2o[c] + pail45p_hs[c] -> h[c] + dag_hs[c] + mi145p[c]	(23236.2) or (5336.1) or (9651.1) or (113026.1) or (89869.1) or (84812.1) or (5330.1) or (5335.1) or (51196.1) or (5333.1) or (5332.2) or (5331.1) or (5335.2) or (5334.1) or (5332.1) or (257068.1) or (23236.1) or (23007.1)	113026.1 23007.1 23236.1 23236.2 257068.1 51196.1 5330.1 5331.1 5332.1 5332.2 5333.1 5334.1 5335.1 5335.2 5336.1 84812.1 89869.1 9651.1		Inositol phosphate metabolism	0	0	1000	0	1		NOTES:SAB copied from DNAMTn
PI4P3K	phosphatidylinositol 4-phosphate 3-kinase	atp[c] + 2 h[c] + pail4p_hs[c] -> adp[c] + pail34p_hs[c]	(5291.1 and 5295.3) or (5296.1 and 5290.1) or (5293.1 and 5296.1) or (5287.1) or (5286.1) or (5293.1 and 8503.1) or (5293.1 and 5295.3) or (5291.1 and 8503.1) or (5295.2 and 5290.1) or (5288.1) or (5291.1 and 5295.1) or (5296.1 and 5291.1) or (23533.1 and 5294.1) or (5293.1 and 5295.1) or (5295.2 and 5293.1) or (5290.1 and 8503.1) or (5290.1 and 5295.3) or (10870.1 and 5294.1) or (5295.2 and 5291…	10870.1 23533.1 5286.1 5287.1 5288.1 5290.1 5291.1 5293.1 5294.1 5295.1 5295.2 5295.3 5296.1 8503.1		Inositol phosphate metabolism	0	0	1000	0	4	3.6.3.1	NOTES:IT	PMID:11226231
PI4P3Kn	phosphatidylinositol 4-phosphate 3-kinase, nuclear	atp[n] + pail4p_hs[n] -> h[n] + adp[n] + pail34p_hs[n]				Inositol phosphate metabolism	0	0	1000	0	4	3.6.3.1	NOTES:IT	PMID:11226231
PI4P5K	phosphatidylinositol 4-phosphate 5-kinase	atp[c] + 2 h[c] + pail4p_hs[c] -> adp[c] + pail45p_hs[c]	(200576.2) or (8396.1) or (200576.3) or (79837.1) or (8394.1) or (23396.1) or (8395.1) or (8396.2) or (5305.1) or (200576.1)	200576.1 200576.2 200576.3 23396.1 5305.1 79837.1 8394.1 8395.1 8396.1 8396.2		Glycerophospholipid metabolism	0	0	1000	0	4		NOTES:IT	PMID:11226231
PI4P5Kn	phosphatidylinositol 4-phosphate 5-kinase, nuclear	atp[n] + pail4p_hs[n] -> h[n] + adp[n] + pail45p_hs[n]				Inositol phosphate metabolism	0	0	1000	0	4	2.1.1.17	NOTES:IT	PMID:11226231
PI4PLC	phosphatidylinositol 4-phosphate phospholipase C	h2o[c] + pail4p_hs[c] -> h[c] + dag_hs[c] + mi14p[c]	(23236.1) or (51196.1) or (9651.1) or (113026.1) or (89869.1) or (23007.1) or (5334.1) or (5331.1) or (5333.1) or (257068.1) or (5332.1) or (23236.2) or (5335.1) or (5335.2) or (5336.1) or (5330.1) or (5332.2) or (84812.1)	113026.1 23007.1 23236.1 23236.2 257068.1 51196.1 5330.1 5331.1 5332.1 5332.2 5333.1 5334.1 5335.1 5335.2 5336.1 84812.1 89869.1 9651.1		Inositol phosphate metabolism	0	0	1000	0	4	2.1.1.17	NOTES:IT	PMID:11226231
PI4PP	phosphatidylinositol-4-phosphate 4-phosphatase	h2o[c] + pail4p_hs[c] -> pi[c] + pail_hs[c]				Inositol phosphate metabolism	0	0	1000	0	4		NOTES:IT	PMID:11226231
PI5P3K	phosphatidylinositol-5-phosphate 3-kinase	atp[c] + 2 h[c] + pail5p_hs[c] -> adp[c] + pail35p_hs[c]	(5295.2 and 5291.1) or (23533.1 and 5294.1) or (5295.2 and 5290.1) or (5293.1 and 5295.3) or (5287.1) or (5286.1) or (5293.1 and 5296.1) or (5295.2 and 5293.1) or (5296.1 and 5291.1) or (5290.1 and 5295.1) or (5288.1) or (5290.1 and 8503.1) or (5291.1 and 5295.3) or (10870.1 and 5294.1) or (5291.1 and 8503.1) or (5293.1 and 5295.1) or (5296.1 and 5290.1) or (5289.1) or (5293.1 and 8503.1) or (529…	10870.1 23533.1 5286.1 5287.1 5288.1 5289.1 5290.1 5291.1 5293.1 5294.1 5295.1 5295.2 5295.3 5296.1 8503.1		Inositol phosphate metabolism	0	0	1000	0	4	2.7.1.105	NOTES:IT	PMID:11226231
PI5P4K	phosphatidylinositol-5-phosphate 4-kinase	atp[c] + 2 h[c] + pail5p_hs[c] -> adp[c] + pail45p_hs[c]	(5297.1) or (55361.1) or (5298.1)	5297.1 5298.1 55361.1		Inositol phosphate metabolism	0	0	1000	0	4		NOTES:IT	PMID:11226231
PI5P4Kn	phosphatidylinositol-5-phosphate 4-kinase, nuclear	atp[n] + pail5p_hs[n] -> h[n] + adp[n] + pail45p_hs[n]				Inositol phosphate metabolism	0	0	1000	0	4	3.1.1.31	NOTES:IT	PMID:11226231
PIK3	phosphatidylinositol 3-kinase	atp[c] + 2 h[c] + pail_hs[c] -> adp[c] + pail3p_hs[c]	(5295.2 and 5291.1) or (23533.1 and 5294.1) or (5290.1 and 5295.1) or (5293.1 and 5295.3) or (5287.1) or (5286.1) or (5293.1 and 5296.1) or (5295.2 and 5293.1) or (5296.1 and 5291.1) or (5290.1 and 5295.3) or (5288.1) or (5290.1 and 8503.1) or (5291.1 and 5295.3) or (10870.1 and 5294.1) or (5291.1 and 8503.1) or (5293.1 and 5295.1) or (5296.1 and 5290.1) or (5289.1) or (5293.1 and 8503.1) or (529…	10870.1 23533.1 5286.1 5287.1 5288.1 5289.1 5290.1 5291.1 5293.1 5294.1 5295.1 5295.2 5295.3 5296.1 8503.1		Inositol phosphate metabolism	0	0	1000	0	4	3.1.1.31	NOTES:IT	PMID:11226231
PIK3n	phosphatidylinositol 3-kinase, nuclear	atp[n] + pail_hs[n] -> h[n] + adp[n] + pail3p_hs[n]				Inositol phosphate metabolism	0	0	1000	0	4	3.1.3.18	NOTES:IT	PMID:11226231
PIK4	phosphatidylinositol 4-kinase	atp[c] + 2 h[c] + pail_hs[c] -> adp[c] + pail4p_hs[c]	(5298.1) or (55361.1) or (5297.1)	5297.1 5298.1 55361.1		Glycerophospholipid metabolism	0	0	1000	0	4	5.4.2.1	NOTES:IT	PMID:11226231
PIK4n	phosphatidylinositol 4-kinase, nuclear	atp[n] + pail_hs[n] -> h[n] + adp[n] + pail4p_hs[n]				Inositol phosphate metabolism	0	0	1000	0	4	5.4.2.2	NOTES:IT	PMID:11226231
PIK5	phosphatidylinositol 5-kinase	atp[c] + 2 h[c] + pail_hs[c] -> adp[c] + pail5p_hs[c]	(8394.1) or (23396.1) or (8395.1)	23396.1 8394.1 8395.1		Inositol phosphate metabolism	0	0	1000	0	4	3.1.3.27	NOTES:IT	PMID:11226231
PIK5n	phosphatidylinositol 5-kinase, nuclear	atp[n] + pail_hs[n] -> h[n] + adp[n] + pail5p_hs[n]				Inositol phosphate metabolism	0	0	1000	0	4	2.7.8.11	NOTES:IT	PMID:11226231
PIPLC	phosphatidylinositol phospholipase C	h2o[c] + pail_hs[c] -> h[c] + dag_hs[c] + mi1p_D[c]	(23236.2) or (5336.1) or (23007.1) or (113026.1) or (89869.1) or (84812.1) or (9651.1) or (5335.1) or (51196.1) or (257068.1) or (5332.2) or (5331.1) or (5335.2) or (5334.1) or (5332.1) or (5330.1) or (23236.1) or (5333.1)	113026.1 23007.1 23236.1 23236.2 257068.1 51196.1 5330.1 5331.1 5332.1 5332.2 5333.1 5334.1 5335.1 5335.2 5336.1 84812.1 89869.1 9651.1		Inositol phosphate metabolism	0	0	1000	0	4		NOTES:IT	PMID:11226231
PIter	phosphate transport, endoplasmic reticulum	pi[r] <=> pi[c]	-2544.1	2544.1		Transport, endoplasmic reticular	1	-1000	1000	0	4		NOTES:IT	PMID:11226231
PItg	phosphate transport, Golgi apparatus	pi[g] -> pi[c]				Transport, golgi apparatus	0	0	1000	0	4		NOTES:IT	PMID:11226231
PItn	phosphate transport, nuclear	pi[n] <=> pi[c]				Transport, nuclear	1	-1000	1000	0	4	3.1.3.67	NOTES:IT	PMID:11226231
PItx	Phosphate transporter, peroxisome	pi[c] <=> pi[x]				Transport, peroxisomal	1	-1000	1000	0	4	3.1.3.67	NOTES:IT	PMID:11226231
PLA2_2e	phospholipase A2	h2o[e] + pchol_hs[e] -> h[e] + lpchol_hs[e] + Rtotal2[e]	(5322.1) or (5319.1) or (81579.1) or (64600.1) or (26279.1) or (5320.1) or (8399.1) or (30814.1)	26279.1 30814.1 5319.1 5320.1 5322.1 64600.1 81579.1 8399.1		Glycerophospholipid metabolism	0	0	1000	0	4		NOTES:IT	PMID:11226231
PMANM	phosphomannomutase	man1p[c] <=> man6p[c]	(5372.1) or (55276.1) or (5373.1)	5372.1 5373.1 55276.1		Fructose and mannose metabolism	1	-1000	1000	0	4		NOTES:IT	PMID:11226231
PMEVKx	phosphomevalonate kinase	atp[x] + 5pmev[x] -> h[x] + adp[x] + 5dpmev[x]	-10654.1	10654.1		Cholesterol metabolism	0	0	1000	0	4		NOTES:IT	PMID:11226231
PMTCOAtx	fatty acid intracellular transport	pmtcoa[c] <=> pmtcoa[x]				Transport, peroxisomal	1	-1000	1000	0	4		NOTES:IT	PMID:11226231
PNTK	pantothenate kinase	atp[c] + 2 h[c] + pnto_R[c] -> adp[c] + 4ppan[c]	(79646.1) or (80025.2) or (53354.1) or (53354.3) or (80025.1) or (53354.2) or (80025.3) or (80025.4) or (55229.1)	53354.1 53354.2 53354.3 55229.1 79646.1 80025.1 80025.2 80025.3 80025.4		CoA synthesis	0	0	1000	0	4		NOTES:IT	PMID:11226231
PNTOt5	Pantothenate sodium symporter II	h2o[c] + atp[c] + na1[e] + pnto_R[e] -> adp[c] + h[c] + pi[c] + na1[c] + pnto_R[c]	-8884.1	8884.1		Transport, extracellular	0	0	1000	0	4		NOTES:IT	PMID:11226231
PPA	inorganic diphosphatase	h2o[c] + ppi[c] -> h[c] + 2 pi[c]	-5464.1	5464.1		Oxidative phosphorylation	0	0	1000	0	4		NOTES:IT	PMID:11226231
PPA2	inorganic triphosphatase	h2o[c] + pppi[c] -> h[c] + pi[c] + ppi[c]				Miscellaneous	0	0	1000	0	4	2.7.1.68	NOTES:IT	PMID:11226231
PPAer	inorganic diphosphatase, endoplasmic reticulum	h2o[r] + ppi[r] -> h[r] + 2 pi[r]	(2538.1) or (92579.1) or (57818.1)	2538.1 57818.1 92579.1		Miscellaneous	0	0	1000	0	4		NOTES:IT	PMID:11226231
PPAm	inorganic diphosphatase	h2o[m] + ppi[m] -> h[m] + 2 pi[m]	(27068.4) or (27068.1) or (27068.3) or (27068.2)	27068.1 27068.2 27068.3 27068.4		Oxidative phosphorylation	0	1	1	0	4	2.7.1.68	NOTES:IT	PMID:11226231
PPAn	inorganic diphosphatase, nuclear	h2o[n] + ppi[n] -> h[n] + 2 pi[n]				Miscellaneous	0	0	1000	0	4	2.7.1.153	NOTES:IT	PMID:11226231
PPAP	phosphatidic acid phosphatase	h2o[c] + pa_hs[c] -> pi[c] + dag_hs[c]	(8612.1) or (8611.1) or (8613.1) or (8611.2)	8611.1 8611.2 8612.1 8613.1		Triacylglycerol synthesis	0	0	1000	0	4	2.7.1.153	NOTES:IT	PMID:11226231
PPAt	Propionate transport, diffusion	ppa[e] -> ppa[c]				Transport, extracellular	0	0	1000	0	4		NOTES:IT	PMID:11226231
PPDOx	Propane-1,2-diol:NAD+ 1-oxidoreductase	h[c] + nadh[c] + lald_D[c] -> nad[c] + 12ppd_R[c]	-8574.1	8574.1		Pyruvate metabolism	0	0	1000	0	4	3.1.3.36	NOTES:IT	PMID:11226231
PPDOy	Propane-1,2-diol:NADP+ 1-oxidoreductase	h[c] + nadph[c] + lald_D[c] -> nadp[c] + 12ppd_R[c]	(8574.1) or (231.1) or (10327.2) or (10327.1)	10327.1 10327.2 231.1 8574.1		Pyruvate metabolism	0	0	1000	0	4	3.1.3.36	NOTES:IT	PMID:11226231
PPItr	Diphosphate transporter, endoplasmic reticulum	ppi[c] <=> ppi[r]				Transport, endoplasmic reticular	1	-1000	1000	0	4	3.1.4.11	NOTES:IT	PMID:11226231
PPItx	Diphosphate transporter, peroxisome	ppi[c] <=> ppi[x]				Transport, peroxisomal	1	-1000	1000	0	4	2.7.1.68	NOTES:IT	PMID:11226231
PPM	phosphopentomutase	r1p[c] <=> r5p[c]	-5236.1	5236.1		Pentose phosphate pathway	1	-1000	1000	0	4		NOTES:IT	PMID:11226231
PRDXl	Peroxidase (multiple substrates)	h2o2[l] + meoh[l] -> 2 h2o[l] + fald[l]	-4353.1	4353.1		Miscellaneous	0	0	1000	0	4	2.7.1.68	NOTES:IT	PMID:11226231
PRISTCOAtx	pristcoa peroxisomal transport	pristcoa[x] <=> pristcoa[c]				Transport, peroxisomal	1	-1000	1000	0	4	2.7.1.68	NOTES:IT	PMID:11226231
PROSTGE2t	prostaglandin transport via bicarbonate countertransport	hco3[c] + prostge2[e] <=> hco3[e] + prostge2[c]	(28231.1) or (6578.1) or (28232.1) or (6579.1)	28231.1 28232.1 6578.1 6579.1		Transport, extracellular	1	-1000	1000	0	4		NOTES:IT	PMID:11226231
PROSTGH2t	Prostaglandin H2 transport	hco3[c] + prostgh2[e] <=> hco3[e] + prostgh2[c]				Transport, extracellular	1	-1000	1000	0	4		NOTES:IT	PMID:11226231
PROSTGI2t	Prostaglandin I2 transport	hco3[c] + prostgi2[e] <=> hco3[e] + prostgi2[c]				Transport, extracellular	1	-1000	1000	0	4		NOTES:IT	PMID:11226231
PROt4	Na+/Proline-L symporter	na1[e] + pro_L[e] -> na1[c] + pro_L[c]	(55089.1) or (81539.1) or (54407.1)	54407.1 55089.1 81539.1		Transport, extracellular	0	0	1000	0	4	2.7.1.149	NOTES:IT	PMID:11226231
PSDm_hs	Phosphatidylserine decarboxylase	h[m] + ps_hs[m] -> co2[m] + pe_hs[m]	-23761.1	23761.1		Glycerophospholipid metabolism	0	0	1000	0	4	2.7.1.149	NOTES:IT	PMID:11226231
PSFLIP	phosphatidylserine flippase	h2o[c] + atp[c] + ps_hs[e] -> adp[c] + h[c] + pi[c] + ps_hs[c]	(10396.1) or (57194.1)	10396.1 57194.1		Transport, extracellular	0	0	1000	0	4	2.7.1.137	NOTES:IT	PMID:11226231
PSFLIPm	phosphatidylserine flippase	h2o[c] + atp[c] + ps_hs[c] -> adp[c] + h[c] + pi[c] + ps_hs[m]	(10396.1) or (57194.1)	10396.1 57194.1		Transport, mitochondrial	0	0	1000	0	4	2.7.1.137	NOTES:IT	PMID:11226231
PSSA1_hs	Phosphatidylserine synthase homo sapiens	ser_L[c] + pchol_hs[c] <=> chol[c] + ps_hs[c]	-9791.1	9791.1		Glycerophospholipid metabolism	1	-1000	1000	0	4	2.7.1.67	NOTES:IT	PMID:11226231
PSt3	phosphatidylserine transport	ps_hs[e] <=> ps_hs[c]				Transport, extracellular	1	-1000	1000	0	4	2.7.1.67	NOTES:IT	PMID:11226231
PTHPS	6-pyruvoyltetrahydropterin synthase	ahdt[c] -> pppi[c] + 6pthp[c]	-5805.1	5805.1		Tetrahydrobiopterin metabolism	0	0	1000	0	4		NOTES:IT	PMID:11226231
PUNP1	purine-nucleoside phosphorylase (Adenosine)	pi[c] + adn[c] <=> ade[c] + r1p[c]	-4860.1	4860.1		Nucleotide interconversion	1	-1000	1000	0	4		NOTES:IT	PMID:11226231
PUNP2	purine-nucleoside phosphorylase (Deoxyadenosine)	pi[c] + dad_2[c] <=> 2dr1p[c] + ade[c]	-4860.1	4860.1		Purine catabolism	1	-1000	1000	0	4	3.1.4.3	NOTES:IT	PMID:11226231
PUNP3	purine-nucleoside phosphorylase (Guanosine)	pi[c] + gsn[c] <=> gua[c] + r1p[c]	-4860.1	4860.1		Purine catabolism	1	-1000	1000	0	4		NOTES:IT	PMID:11226231
PUNP4	purine-nucleoside phosphorylase (Deoxyguanosine)	pi[c] + dgsn[c] <=> 2dr1p[c] + gua[c]	-4860.1	4860.1		Purine catabolism	1	-1000	1000	0	4		NOTES:IT	PMID:11226231
PUNP5	purine-nucleoside phosphorylase (Inosine)	pi[c] + ins[c] <=> hxan[c] + r1p[c]	-4860.1	4860.1		Purine catabolism	1	-1000	1000	0	4		NOTES:IT	PMID:11226231
PUNP6	purine-nucleoside phosphorylase (Deoxyinosine)	pi[c] + din[c] <=> 2dr1p[c] + hxan[c]	-4860.1	4860.1		Purine catabolism	1	-1000	1000	0	4		NOTES:IT	PMID:11226231
PUNP7	purine-nucleoside phosphorylase (Xanthosine)	pi[c] + xtsn[c] <=> xan[c] + r1p[c]	-4860.1	4860.1		Nucleotide interconversion	1	-1000	1000	0	4	3.1.1.4	NOTES:IT	PMID:11226231
PYAM5POr	pyridoxamine 5'-phosphate oxidase	h2o[c] + o2[c] + pyam5p[c] -> h2o2[c] + nh4[c] + pydx5p[c]	-55163.1	55163.1		Vitamin B6 metabolism	0	0	1000	0	4	5.4.2.8	NOTES:IT	PMID:11226231
PYDAMK	pyridoxamine kinase	atp[c] + 2 h[c] + pydam[c] -> adp[c] + pyam5p[c]	-8566.1	8566.1		Vitamin B6 metabolism	0	0	1000	0	4	2.7.4.2	NOTES:IT	PMID:11226231
PYDAMtr	pyridoxamine transport via diffusion	pydam[e] <=> pydam[c]				Transport, extracellular	1	-1000	1000	0	4		NOTES:IT	PMID:11226231
PYDXK	pyridoxal kinase	atp[c] + 2 h[c] + pydx[c] -> adp[c] + pydx5p[c]	-8566.1	8566.1		Vitamin B6 metabolism	0	0	1000	0	4		NOTES:IT	PMID:11226231
PYDXNK	pyridoxine kinase	atp[c] + 2 h[c] + pydxn[c] -> adp[c] + pdx5p[c]	-8566.1	8566.1		Vitamin B6 metabolism	0	0	1000	0	4		NOTES:IT	PMID:11226231
PYDXNtr	pyridoxine transport via diffusion	pydxn[e] <=> pydxn[c]				Transport, extracellular	1	-1000	1000	0	4	3.6.1.1	NOTES:IT	PMID:11226231
PYDXPP	Pyridoxal 5-phosphate phosphatase	h2o[c] + pydx5p[c] -> pi[c] + pydx[c]	-57026.1	57026.1		Vitamin B6 metabolism	0	0	1000	0	2		NOTES:EC-4.1.1.- NCD	PMID:9296457
PYDXtr	Pyridoxal transport	pydx[e] <=> pydx[c]				Transport, extracellular	1	-1000	1000	0	2	3.6.1.1	NOTES:EC-4.1.1.- NCD	PMID:9296457
PYK	pyruvate kinase	adp[c] + pep[c] -> atp[c] + 2 h[c] + pyr[c]	(5315.2) or (5313.2) or (5315.3) or (5313.1) or (113452.1) or (5315.1)	113452.1 5313.1 5313.2 5315.1 5315.2 5315.3		Glycolysis/gluconeogenesis	0	0	22.3527	0	2	3.6.1.1	NOTES:NCD	PMID:10727845,PMID:9296457
PYNP2r	pyrimidine-nucleoside phosphorylase (uracil)	pi[c] + uri[c] <=> ura[c] + r1p[c]	(7378.2) or (151531.1) or (7378.1)	151531.1 7378.1 7378.2		Pyrimidine catabolism	1	-1000	1000	0	2	3.6.1.1	NOTES:NCD	PMID:10727845
PYRt2p	pyruvate peroxisomal transport via proton symport	h[c] + pyr[c] <=> h[x] + pyr[x]	(6566.1) or (9194.1)	6566.1 9194.1		D-alanine metabolism	1	-1000	1000	0	0	3.1.3.4	NOTES:NCD
PYRt2r	pyruvate reversible transport via proton symport	h[e] + pyr[e] <=> h[c] + pyr[c]	(9123.1) or (9194.1) or (6566.1)	6566.1 9123.1 9194.1		Transport, extracellular	1	-1000	1000	0	0		NOTES:NCD	PMID:8413235,PMID:9367678
RADH	retinal dehydrogenase	h2o[c] + nad[c] + retinal[c] -> 2 h[c] + nadh[c] + retn[c]				Vitamin A metabolism	0	0	1000	0	0	1.1.1.21	NOTES:NCD	PMID:12137737
RADH2	retinal dehydrogenase (NADPH)	h2o[c] + nadp[c] + retinal[c] -> 2 h[c] + nadph[c] + retn[c]				Vitamin A metabolism	0	0	1000	0	0	1.1.1.21	NOTES:NCD	PMID:12137737
RADH3	retinal dehydrogenase	h2o[c] + nad[c] + retinal_cis_13[c] -> 2 h[c] + nadh[c] + 13_cis_retn[c]				Vitamin A metabolism	0	0	1000	0	0		NOTES:	PMID:12137737
RADH4	retinal dehydrogenase (NADPH)	h2o[c] + nadp[c] + retinal_cis_13[c] -> 2 h[c] + nadph[c] + 13_cis_retn[c]				Vitamin A metabolism	0	0	1000	0	0		NOTES:	PMID:12137737
RAHY	retinoic acid hydroxylation (P450)	o2[c] + h[c] + nadph[c] + retn[c] -> h2o[c] + nadp[c] + hretn[c]				Vitamin A metabolism	0	0	1000	0	0	5.4.2.7	NOTES:	PMID:12137737
RAI1	retinal isomerase (11-cis)	retinal[c] <=> retinal_11_cis[c]				Vitamin A metabolism	1	-1000	1000	0	0	1.11.1.7	NOTES:	PMID:12137737
RAI2	retinal isomerase (9-cis)	retinal[c] <=> retinal_cis_9[c]				Vitamin A metabolism	1	-1000	1000	0	0		NOTES:
RAI3	13-cis-retinoic acid isomerase	retn[c] <=> 13_cis_retn[c]	(2944.1) or (2944.2)	2944.1 2944.2		Vitamin A metabolism	1	-1000	1000	0	0		NOTES:
RAI4	13-cis-4-oxo-retinoic acid isomerase	oretn[c] <=> 13_cis_oretn[c]				Vitamin A metabolism	1	-1000	1000	0	0		NOTES:
RAtn3	13-cis-retinoic acid transport, nuclear	13_cis_retn[c] <=> 13_cis_retn[n]				Transport, nuclear	1	-1000	1000	0	0		NOTES:
RBFK	riboflavin kinase	atp[c] + 2 h[c] + ribflv[c] -> adp[c] + fmn[c]	-55312.1	55312.1		Vitamin B2 metabolism	0	0	1000	0	0		NOTES:	PMID:12137737
RDH1	retinol dehydrogenase (all-trans)	nad[c] + retinol[c] <=> h[c] + nadh[c] + retinal[c]	(5959.1) or (8608.1)	5959.1 8608.1		Vitamin A metabolism	1	-1000	1000	0	0	4.1.1.65	NOTES:	PMID:12137737
RDH1a	retinol dehydrogenase (all-trans,NADPH)	nadp[c] + retinol[c] -> h[c] + nadph[c] + retinal[c]	(157506.1) or (112724.1) or (145226.1) or (51109.1) or (195814.1) or (57665.1) or (50700.1)	112724.1 145226.1 157506.1 195814.1 50700.1 51109.1 57665.1		Vitamin A metabolism	0	0	1000	0	0		NOTES:	PMID:12137737
RDH2	retinol dehydrogenase (9-cis,NADH)	nad[c] + retinol_9_cis[c] <=> h[c] + nadh[c] + retinal_cis_9[c]	-5959.1	5959.1		Vitamin A metabolism	1	-1000	1000	0	0		NOTES:	PMID:12137737
RDH2a	retinol dehydrogenase (9-cis,NADPH)	nadp[c] + retinol_9_cis[c] -> h[c] + nadph[c] + retinal_cis_9[c]	(195814.1) or (112724.1) or (145226.1) or (51109.1) or (57665.1) or (50700.1)	112724.1 145226.1 195814.1 50700.1 51109.1 57665.1		Vitamin A metabolism	0	0	1000	0	0	2.7.8.8	NOTES:EC 2.4.1.- NCD
RDH3	retinol dehydrogenase (11-cis,NADH)	nad[c] + retinol_cis_11[c] <=> h[c] + nadh[c] + retinal_11_cis[c]	-5959.1	5959.1		Vitamin A metabolism	1	-1000	1000	0	0	2.7.8.8	NOTES:EC 2.4.1.- NCD	PMID:10359825
RDH3a	retinol dehydrogenase (11-cis,NADPH)	nadp[c] + retinol_cis_11[c] -> h[c] + nadph[c] + retinal_11_cis[c]	(112724.1) or (145226.1) or (51109.1) or (57665.1) or (195814.1)	112724.1 145226.1 195814.1 51109.1 57665.1		Vitamin A metabolism	0	0	1000	0	0	4.2.3.12	NOTES:EC 2.4.1.- NCD
RDH4	retinol dehydrogenase (13-cis,NADH)	nad[c] + retinol_cis_13[c] <=> h[c] + nadh[c] + retinal_cis_13[c]	-5959.1	5959.1		Vitamin A metabolism	1	-1000	1000	0	0	3.4.2.1	NOTES:EC 2.4.1.- NCD
RETFA	retinol acyltransferase	Rtotal2coa[c] + retinol[c] -> coa[c] + retfa[c]				Vitamin A metabolism	0	0	1000	0	0	3.4.2.1	NOTES:EC 2.4.1.- NCD
RETFAt	fatty acid retinol efflux	retfa[c] -> retfa[e]				Transport, extracellular	0	0	1000	0	0	3.4.2.1	NOTES:EC 2.4.1.- NCD
RETFAt1	fatty acid retinol efflux (9-cis)	9_cis_retfa[c] -> 9_cis_retfa[e]				Transport, extracellular	0	0	1000	0	0	3.4.2.1	NOTES:	PMID:11425794
RETFAt2	fatty acid retinol efflux (11-cis)	11_cis_retfa[c] -> 11_cis_retfa[e]				Transport, extracellular	0	0	1000	0	0	3.4.2.1	NOTES:	PMID:11425794
RETH1	retinyl ester hydrolase (9-cis)	h2o[c] + 9_cis_retfa[c] -> h[c] + Rtotal2[c] + retinol_9_cis[c]				Vitamin A metabolism	0	0	1000	0	0	3.4.2.1	NOTES:NCD	PMID:11420690
RETH1e	retinyl ester hydrolase (9-cis), extracellular	h2o[e] + 9_cis_retfa[e] -> h[e] + retinol_9_cis[e] + Rtotal2[e]				Vitamin A metabolism	0	0	1000	0	0	3.4.2.1	NOTES:NCD	PMID:11420690
RETH2	retinyl ester hydrolase (11-cis)	h2o[c] + 11_cis_retfa[c] -> h[c] + Rtotal2[c] + retinol_cis_11[c]				Vitamin A metabolism	0	0	1000	0	0	1.4.3.5	NOTES:NCD
RETH2e	retinyl ester hydrolase (11-cis), extracellular	h2o[e] + 11_cis_retfa[e] -> h[e] + retinol_cis_11[e] + Rtotal2[e]				Vitamin A metabolism	0	0	1000	0	0		NOTES:NCD
RETHe	retinyl ester hydrolase, extracellular	h2o[e] + retfa[e] -> h[e] + retinol[e] + Rtotal2[e]				Vitamin A metabolism	0	0	1000	0	0		NOTES:
RETI1	retinol isomerase (11-cis)	retinol[c] <=> retinol_cis_11[c]				Vitamin A metabolism	1	-1000	1000	0	0		NOTES:
RETI2	retinol isomerase (9-cis)	retinol[c] <=> retinol_9_cis[c]				Vitamin A metabolism	1	-1000	1000	0	0		NOTES:NCD
RETI3	retinol isomerase (13-cis)	retinol[c] <=> retinol_cis_13[c]				Vitamin A metabolism	1	-1000	1000	0	0		NOTES:NCD
RETNt	retinoic acid transport	retn[c] <=> retn[e]				Transport, extracellular	1	-1000	1000	0	0		NOTES:
RETNtr2	retinoic acid transport in ER (13-cis)	13_cis_retn[c] -> 13_cis_retn[r]				Transport, endoplasmic reticular	0	0	1000	0	0		NOTES:
RETt	Retinol transport via faciliated diffusion	retinol[e] -> retinol[c]				Transport, extracellular	0	0	1000	0	4		NOTES:SAB
RIBFLVt3	riboflavin transport (ATP dependent)	h2o[c] + atp[c] + ribflv[e] -> adp[c] + h[c] + pi[c] + ribflv[c]				Transport, extracellular	0	0	1000	0	4	2.4.2.2	NOTES:SAB	PMID:5294951
RIBt	ribose transport via diffusion	rib_D[e] <=> rib_D[c]				Transport, extracellular	1	-1000	1000	0	4		NOTES:SAB	PMID:1847521
RIBt2	ribose transport in via proton symporter	h[e] + rib_D[e] -> h[c] + rib_D[c]				Transport, extracellular	0	0	1000	0	4		NOTES:SAB	PMID:5294951
RPI	ribose-5-phosphate isomerase	r5p[c] <=> ru5p_D[c]	-22934.1	22934.1		Pentose phosphate pathway	1	-1000	1000	0	1		NOTES:SAB excretion of dopamine sulfate
RTOTAL2t	RTOTAL2 transport	Rtotal2[e] <=> Rtotal2[c]				Transport, extracellular	1	-1000	1000	0	4		NOTES:RS/TV (6/14/2005)	PMID:11535246,PMID:15293241
RTOTAL3t	RTOTAL3 transport	Rtotal3[e] <=> Rtotal3[c]				Transport, extracellular	1	-1000	1000	0	4		NOTES:SAB	PMID:12719981
RTOTALt	RTOTAL transport	Rtotal[e] <=> Rtotal[c]				Transport, extracellular	1	-1000	1000	0	4		NOTES:SAB electrogenic, Na indepdendent &amp; rev NJ	PMID:12883891
S23T2g	beta-galactoside alpha-2,3-sialyltransferase (core 2)	core2[g] + cmpacna[g] -> h[g] + cmp[g] + ksii_core2_pre1[g]	(6484.1) or (6482.1) or (6483.1) or (6482.2)	6482.1 6482.2 6483.1 6484.1		Keratan sulfate synthesis	0	0	1000	0	4		NOTES:SAB This reaction represents the ATP driven secretion of dopa from the cell. It leaves out the vesicle because that is not a compartment. ATP:H ratio is assumed as 1:3 for vacuolar ATPase and substrate:h ratio is 1:2. This gives a 3:2 ratio for substrate:ATP	PMID:12827358,PMID:15383652
S2L2N2M2MASNtly	s2l2n2m2masn transport, extracellular to lysosome	s2l2n2m2masn[e] -> s2l2n2m2masn[l]				Transport, lysosomal	0	0	1000	0	4	5.2.1.3	NOTES:SAB	PMID:8103425,PMID:9153402
S2TASE1ly	iduronate-2-sulfatase, lysosomal	h2o[l] + hs_deg15[l] -> h[l] + so4[l] + hs_deg16[l]	(3423.1) or (3423.2)	3423.1 3423.2		Heparan sulfate degradation	0	0	1000	0	4	5.2.1.3	NOTES:
S2TASE2ly	iduronate-2-sulfatase, lysosomal	h2o[l] + hs_deg21[l] -> h[l] + so4[l] + hs_deg22[l]	(3423.1) or (3423.2)	3423.1 3423.2		Heparan sulfate degradation	0	0	1000	0	2		NOTES:IT	PMID:6313022
S2TASE4ly	glucuronate-2-sulfatase, lysosomal	h2o[l] + cs_d_deg2[l] -> h[l] + so4[l] + cs_d_deg3[l]				Chondroitin sulfate degradation	0	0	1000	0	0		NOTES:added EC num; also EC 5.4.2.4 -- NCD	PMID:15949708,PMID:17052986
S2TASE5ly	glucuronate-2-sulfatase, lysosomal	h2o[l] + cs_d_deg6[l] -> h[l] + so4[l] + cs_c_deg5[l]				Chondroitin sulfate degradation	0	0	1000	0	0		NOTES:	PMID:15949708,PMID:17052986
S3TASE1ly	N-acetylglucosamine-3-sulfatase, lysosomal	h2o[l] + hs_deg10[l] <=> h[l] + so4[l] + hs_deg11[l]				Heparan sulfate degradation	1	-1000	1000	0	2		NOTES:enzyme has not been identified yet IT	PMID:11051212,PMID:7380842
S3TASE2ly	N-acetylglucosamine-3-sulfatase, lysosomal	h2o[l] + hs_deg17[l] <=> h[l] + so4[l] + hs_deg18[l]				Heparan sulfate degradation	1	-1000	1000	0	4	1.1.1.105	NOTES:peroxisomal version - NJ	PMID:8188698
S3TASE3ly	N-acetylglucosamine-3-sulfatase, lysosomal	h2o[l] + hs_deg23[l] <=> h[l] + so4[l] + hs_deg24[l]				Heparan sulfate degradation	1	-1000	1000	0	2	1.1.1.105	NOTES:by analogy to other dimethyl transferase rxns. See PMID: 10586494, human interemidate (from C15 -&gt;C50) not explicitly determined yet, however it is known to occur since this pathway is essential in Q10 synthesis. For human metabolism: may be associated w/ GeneID: 23590 TPRT - recheck lit in future IT and NJ	PMID:16262699
S6T1g	galactose/N-acetylglucosamine 6-O-sulfotransferase, Golgi apparatus	ksii_core2_pre5[g] + paps[g] -> h[g] + ksii_core2_pre6[g] + pap[g]	(23563.2) or (9435.1) or (23563.1) or (10164.1) or (4166.1)	10164.1 23563.1 23563.2 4166.1 9435.1		Keratan sulfate synthesis	0	0	1000	0	4	1.1.1.105	NOTES:MM. rat brain activity, presumed to be in mammalians	PMID:16141519
S6T2g	galactose/N-acetylglucosamine 6-O-sulfotransferase, Golgi apparatus	ksii_core2_pre8[g] + paps[g] -> h[g] + ksii_core2_pre9[g] + pap[g]	(23563.2) or (9435.1) or (23563.1) or (10164.1) or (4166.1)	10164.1 23563.1 23563.2 4166.1 9435.1		Keratan sulfate synthesis	0	0	1000	0	2	1.1.1.105	NOTES:NCD	PMID:9693094
S6T3g	galactose/N-acetylglucosamine 6-O-sulfotransferase, Golgi apparatus	ksii_core2_pre10[g] + paps[g] -> h[g] + pap[g] + ksii_core2[g]	(8534.1) or (9469.1)	8534.1 9469.1		Keratan sulfate synthesis	0	0	1000	0	2	1.1.1.105	NOTES:NCD	PMID:9693094
S6TASE1ly	N-acetylglucosamine-6-sulfatase, lysosomal	h2o[l] + hs[l] <=> h[l] + so4[l] + hs_deg1[l]	-2799.1	2799.1		Heparan sulfate degradation	1	-1000	1000	0	2	1.1.1.105	NOTES:
S6TASE22ly	galactose-6-sulfate sulfatase, lysosomal	h2o[l] + ksii_core2_deg1[l] <=> h[l] + so4[l] + ksii_core2_deg2[l]	(5476.1) and (2720.1) and (2588.1) and (4758.1)	2588.1 2720.1 4758.1 5476.1		Keratan sulfate degradation	1	-1000	1000	0	2	1.1.1.105	NOTES:CoA transfer not explicitly in rxn (accounted for in Rtotal rxn -&gt; ARTF) NJ
S6TASE23ly	N-acetylglucosamine-6-sulfatase, lysosomal	h2o[l] + ksii_core2_deg3[l] <=> h[l] + so4[l] + ksii_core2_deg4[l]	-2799.1	2799.1		Keratan sulfate degradation	1	-1000	1000	0	2	2.3.1.76	NOTES:NCD
S6TASE24ly	N-acetylglucosamine-6-sulfatase, lysosomal	h2o[l] + ksii_core2_deg6[l] <=> h[l] + so4[l] + ksii_core2_deg7[l]	-2799.1	2799.1		Keratan sulfate degradation	1	-1000	1000	0	4		NOTES:
S6TASE25ly	galactose-6-sulfate sulfatase, lysosomal	h2o[l] + ksii_core4_deg1[l] <=> h[l] + so4[l] + ksii_core4_deg2[l]	(5476.1) and (2720.1) and (2588.1) and (4758.1)	2588.1 2720.1 4758.1 5476.1		Keratan sulfate degradation	1	-1000	1000	0	2		NOTES:IT
S6TASE26ly	N-acetylglucosamine-6-sulfatase, lysosomal	h2o[l] + ksii_core4_deg3[l] <=> h[l] + so4[l] + ksii_core4_deg4[l]	-2799.1	2799.1		Keratan sulfate degradation	1	-1000	1000	0	2		NOTES:IT
S6TASE2ly	N-acetylglucosamine-6-sulfatase, lysosomal	h2o[l] + hs_deg5[l] <=> h[l] + so4[l] + hs_deg6[l]	-2799.1	2799.1		Heparan sulfate degradation	1	-1000	1000	0	2		NOTES:NCD
S6TASE3ly	N-acetylglucosamine-6-sulfatase, lysosomal	h2o[l] + hs_deg11[l] <=> h[l] + so4[l] + hs_deg12[l]	-2799.1	2799.1		Heparan sulfate degradation	1	-1000	1000	0	4		NOTES:_01-26-05 IT based on Lu et al., JBC,1992,24,17102-17109	PMID:1512248,PMID:8221682
S6TASE4ly	N-acetylgalactosamine-6-sulfatase, lysosomal	h2o[l] + cs_c[l] <=> h[l] + so4[l] + cs_c_deg1[l]	(5476.1) and (2720.1) and (2588.1) and (4758.1)	2588.1 2720.1 4758.1 5476.1		Chondroitin sulfate degradation	1	-1000	1000	0	4		NOTES:_01-26-05 IT based on Lu et al., JBC,1992,24,17102-17109	PMID:1512248,PMID:8221682
S6TASE5ly	N-acetylgalactosamine-6-sulfatase, lysosomal	h2o[l] + cs_c_deg3[l] <=> h[l] + so4[l] + cs_c_deg4[l]	(5476.1) and (2720.1) and (2588.1) and (4758.1)	2588.1 2720.1 4758.1 5476.1		Chondroitin sulfate degradation	1	-1000	1000	0	2		NOTES:	PMID:12535661,PMID:9342341
S6TASE6ly	N-acetylgalactosamine-6-sulfatase, lysosomal	h2o[l] + cs_d[l] <=> h[l] + so4[l] + cs_d_deg1[l]	(5476.1) and (2720.1) and (2588.1) and (4758.1)	2588.1 2720.1 4758.1 5476.1		Chondroitin sulfate degradation	1	-1000	1000	0	2		NOTES:	PMID:12535661,PMID:9342341
S6TASE7ly	N-acetylgalactosamine-6-sulfatase, lysosomal	h2o[l] + cs_d_deg4[l] <=> h[l] + so4[l] + cs_d_deg5[l]	(5476.1) and (2720.1) and (2588.1) and (4758.1)	2588.1 2720.1 4758.1 5476.1		Chondroitin sulfate degradation	1	-1000	1000	0	4	5.2.1.7	NOTES:JLR	PMID:11278417,PMID:12849978,PMID:6087295,PMID:9305963
SADT	sulfate adenylyltransferase	atp[c] + h[c] + so4[c] -> ppi[c] + aps[c]	(9060.1) or (9061.1)	9060.1 9061.1		Nucleotide interconversion	0	0	1000	0	2	5.2.1.7	NOTES:	PMID:10899995
SBPP1er	sphingoid base-phosphate phosphatase (sphinganine 1-phosphatase), endoplasmic reticulum	h2o[r] + sph1p[r] -> pi[r] + sphgn[r]	-81537.1	81537.1		Sphingolipid metabolism	0	0	1000	0	2	5.2.1.7	NOTES:IT
SBTR	D-sorbitol reductase	h[c] + nadph[c] + glc_D[c] -> nadp[c] + sbt_D[c]	(8574.1) or (10327.1) or (231.1) or (10327.2)	10327.1 10327.2 231.1 8574.1		Fructose and mannose metabolism	0	0	1000	0	4		NOTES:	PMID:12799180,PMID:8631816,PMID:9070952
Ser_Thrtg	Ser/Thr transport (from golgi to lysosome)	Ser_Thr[g] <=> Ser_Thr[l]				Transport, golgi apparatus	1	-1000	1000	0	4		NOTES:	PMID:12799180,PMID:8631816,PMID:9070952
SERPT	serine C-palmitoyltransferase	h[c] + ser_L[c] + pmtcoa[c] -> co2[c] + 3dsphgn[c] + coa[c]	(10558.1 and 9517.1)	10558.1 9517.1		Sphingolipid metabolism	0	0	1000	0	2		NOTES:unknown mechanism, related cyp P450 metabolism reactions NJ
SERt4	L-serine via sodium symport	na1[e] + ser_L[e] -> na1[c] + ser_L[c]	(81539.1) or (11254.1) or (54407.1) or (55089.1)	11254.1 54407.1 55089.1 81539.1		Transport, extracellular	0	0	1000	0	2		NOTES:unknown mechanism, related cyp P450 metabolism reactions NJ
SERtN1	Serine transport (Na, H coupled)	h[c] + 2 na1[e] + ser_L[e] <=> h[e] + 2 na1[c] + ser_L[c]	-92745.1	92745.1		Transport, extracellular	1	-1000	1000	0	0		NOTES:unknown mechanism, related cyp P450 metabolism reactions NJ
SFGTH	S-Formylglutathione hydralase	h2o[c] + Sfglutth[c] -> h[c] + for[c] + gthrd[c]	-2098.1	2098.1		Tyrosine metabolism	0	0	1000	0	2		NOTES:unknown mechanism, related cyp P450 metabolism reactions NJ
SGPL12r	Sphingosine-1-phosphate lyase	h2o[r] + sphs1p[r] -> h[r] + ethamp[r] + hdca[r]	-8879.1	8879.1		Sphingolipid metabolism	0	0	1000	0	2	5.3.1.6	NOTES:unknown mechanism, related cyp P450 metabolism reactions NJ
SIAASE3ly	sialidase, lysosomal	h2o[l] + ksii_core2[l] -> acnam[l] + ksii_core2_deg1[l]	(5476.1) and (2720.1) and (2588.1) and (4758.1)	2588.1 2720.1 4758.1 5476.1		Keratan sulfate degradation	0	0	1000	0	4		NOTES:involved in lanosterol -&gt; cholesterol pathway NJ	PMID:10391219
SIAASE4ly	sialidase, lysosomal	h2o[l] + ksii_core4[l] -> acnam[l] + ksii_core4_deg1[l]	(5476.1) and (2720.1) and (2588.1) and (4758.1)	2588.1 2720.1 4758.1 5476.1		Keratan sulfate degradation	0	0	1000	0	4		NOTES:involved in lanosterol -&gt; cholesterol pathway NJ	PMID:10391219
SIAASEly	sialidase, lysosomal	2 h2o[l] + s2l2n2m2mn[l] -> 2 acnam[l] + l2n2m2mn[l]	(5476.1) and (2720.1) and (2588.1) and (4758.1)	2588.1 2720.1 4758.1 5476.1		N-glycan degradation	0	0	1000	0	1		NOTES:SAB reaction name uncertain	PMID:8572717
SMS	Sphingomyelin synthase (homo sapiens)	pchol_hs[c] + crm_hs[c] -> dag_hs[c] + sphmyln_hs[c]	-259230	259230		Sphingolipid metabolism	0	0	1000	0	2	2.4.99.4	NOTES:MM. based on assigned short chain enoyl-CoA hydratase activity	PMID:9073515
SO4HCOtex	sulfate transport via bicarbonate countertransport	2 hco3[c] + so4[e] -> 2 hco3[e] + so4[c]	(115111.1) or (115019.2) or (1836.1) or (115111.2) or (116369.2) or (284129.1) or (10861.2) or (116369.1) or (10861.1) or (10861.3) or (115019.1) or (1811.1)	10861.1 10861.2 10861.3 115019.1 115019.2 115111.1 115111.2 116369.1 116369.2 1811.1 1836.1 284129.1		Transport, extracellular	0	0	1000	0	2		NOTES:SAB for mito	PMID:7558027
SO4tl	Sulfate transport (lysosome)	so4[l] <=> so4[c]				Transport, lysosomal	1	-1000	1000	0	2	3.1.6.13	NOTES:SAB for x	PMID:7558027
SPC_HSt	sphingosylphosphorylcholine transport (diffusion)	spc_hs[c] <=> spc_hs[e]				Transport, extracellular	1	-1000	1000	0	2	3.1.6.13	NOTES:MM. based on assigned short chain enoyl-CoA hydratase activity	PMID:9073515
SPH1Pte	sph1p transport	sph1p[c] <=> sph1p[e]				Transport, extracellular	1	-1000	1000	0	2	3.1.6.18	NOTES:SAB EC 3.1.1.-	PMID:8063807
SPH1Ptr	sph1p intracellular transport	sph1p[c] <=> sph1p[r]				Transport, endoplasmic reticular	1	-1000	1000	0	1	3.1.6.18	NOTES:NCD. measured in rat liver and activity is presumed to be in mammalians; substrate erythro-4-hydroxyglutamate is found in humans	PMID:13948827
SPHGNtr	sphinganine intracellular transport	sphgn[r] <=> sphgn[c]				Transport, endoplasmic reticular	1	-1000	1000	0	2	3.1.6.15	NOTES:NCD SAB oaa -&gt; asp-L	PMID:12660328,PMID:15849464
SPHMDAc	sphingomyelin deacylase	h2o[c] + sphmyln_hs[c] -> Rtotal[c] + spc_hs[c]				Sphingolipid metabolism	0	0	1000	0	1	3.1.6.15	NOTES:NCD	PMID:15849464
SPHS1Pte	sphingosine-1-phosphate transport	sphs1p[c] <=> sphs1p[e]				Transport, extracellular	1	-1000	1000	0	4	3.1.6.15	NOTES:NJ
SPHS1Ptr	sphingosine-1-phosphate transport	sphs1p[c] <=> sphs1p[r]				Transport, endoplasmic reticular	1	-1000	1000	0	4		NOTES:NJ
SPMDOX	Spermidine:(acceptor) oxidoreductase	h2o[c] + o2[c] + spmd[c] -> 13dampp[c] + h2o2[c] + 4abutn[c]				beta-Alanine metabolism	0	0	1000	0	4		NOTES:NJ
SPMS	spermidine synthase	ametam[c] + ptrc[c] -> h[c] + 5mta[c] + spmd[c]	-6723.1	6723.1		Urea cycle	0	0	1000	0	2		NOTES:NJ	PMID:11788354,PMID:12864740
SPODM	superoxide dismutase	2 h[c] + 2 o2s[c] -> o2[c] + h2o2[c]	-6647.1	6647.1		ROS detoxification	0	0	1000	0	4	3.1.6.14	NOTES:NJ
SPODMm	superoxide dismutase	2 h[m] + 2 o2s[m] -> o2[m] + h2o2[m]	-6648.1	6648.1		ROS detoxification	0	0	1000	0	4	3.1.6.4	NOTES:NJ
SPODMn	superoxide dismutase, nuclear	2 h[n] + 2 o2s[n] -> h2o2[n] + o2[n]	-6647.1	6647.1		ROS detoxification	0	0	1000	0	4	3.1.6.14	NOTES:NJ
SPODMx	superoxide dismutase, peroxisome	2 h[x] + 2 o2s[x] -> o2[x] + h2o2[x]	-6647.1	6647.1		ROS detoxification	0	0	1000	0	2	3.1.6.14	NOTES:NJ	PMID:11788354,PMID:12864740
SPRMS	spermine synthase	ametam[c] + spmd[c] -> h[c] + sprm[c] + 5mta[c]	-6611.1	6611.1		Urea cycle	0	0	1000	0	0	3.1.6.4	NOTES:NCD	PMID:12114544
STCOAtx	fatty acid intracellular transport	stcoa[c] <=> stcoa[x]				Transport, peroxisomal	1	-1000	1000	0	0	3.1.6.14	NOTES:NCD	PMID:12114544
STRDNCt	fatty acid transport via diffusion	strdnc[e] <=> strdnc[c]				Transport, extracellular	1	-1000	1000	0	0	3.1.6.14	NOTES:NCD
SUCCtp	succinate transporter, peroxisome	succ[c] <=> succ[x]				Transport, peroxisomal	1	-1000	1000	0	0	3.1.6.14	NOTES:NCD
SUCOAS1m	Succinate--CoA ligase (GDP-forming)	coa[m] + gtp[m] + succ[m] <=> pi[m] + gdp[m] + succoa[m]	(8802.1 and 8801.1)	8801.1 8802.1		Citric acid cycle	1	-1000	1000	0	0	3.1.6.4	NOTES:NCD
TAGt	triacylglycerol transport	tag_hs[e] <=> tag_hs[c]				Transport, extracellular	1	-1000	1000	0	0	3.1.6.4	NOTES:NCD	PMID:11007802,PMID:12770767
TALA	transaldolase	g3p[c] + s7p[c] <=> f6p[c] + e4p[c]	-6888.1	6888.1		Pentose phosphate pathway	1	-1000	1000	0	0	3.1.6.4	NOTES:NCD	PMID:11007802,PMID:12770767
TCHOLAte	bile acid intracellular transport	tchola[e] <=> tchola[c]				Transport, extracellular	1	-1000	1000	0	0	3.1.6.4	NOTES:NCD	PMID:11007802,PMID:12770767
TCHOLAtx	bile acid intracellular transport	tchola[x] <=> tchola[c]				Transport, peroxisomal	1	-1000	1000	0	0	2.7.7.4	NOTES:NCD	PMID:11007802
TCYNTt	Thiocyanate transport via diffusion (cytosol to extracellular)	tcynt[c] -> tcynt[e]				Transport, extracellular	0	0	1000	0	0		NOTES:NCD
TDCHOLAte	bile acid intracellular transport	tdchola[e] <=> tdchola[c]				Transport, extracellular	1	-1000	1000	0	0	1.1.1.21	NOTES:NCD
TDCHOLAtx	bile acid intracellular transport	tdchola[x] <=> tdchola[c]				Transport, peroxisomal	1	-1000	1000	0	0		NOTES:SMP	PMID:5939,PMID:6626557
TETHEX3t	fatty acid transport via diffusion	tethex3[e] <=> tethex3[c]				Transport, extracellular	1	-1000	1000	0	4	2.3.1.50	NOTES:SAB
TETPENT3t	fatty acid transport via diffusion	tetpent3[e] <=> tetpent3[c]				Transport, extracellular	1	-1000	1000	0	4		NOTES:NJ	PMID:12507753,PMID:9007731,PMID:9334206
THD1m	NAD(P) transhydrogenase	nadp[m] + h[c] + nadh[m] -> h[m] + nadph[m] + nad[m]	(23530.2) or (23530.1)	23530.1 23530.2		NAD metabolism	0	0	0	0	4		NOTES:IT	PMID:11447229,PMID:12637526,PMID:12835412
THMTP	thiamine-triphosphatase	h2o[c] + thmtp[c] -> h[c] + pi[c] + thmpp[c]	-79178.1	79178.1		Thiamine metabolism	0	0	1000	0	2	3.1.2.12	NOTES:unknown mechanism, however glucuronidated metabolites need to get out of the cell NJ
THRt4	L-threonine via sodium symport	na1[e] + thr_L[e] -> na1[c] + thr_L[c]	(11254.1) or (81539.1) or (54407.1)	11254.1 54407.1 81539.1		Transport, extracellular	0	0	1000	0	2	4.1.2.27	NOTES:
THYMDt1	thymd transport	thymd[e] -> thymd[c]	(3177.1) or (2030.1)	2030.1 3177.1		Transport, extracellular	0	0	1000	0	2	3.2.1.18	NOTES:specific mechanism not known, proton dependence for trans-mit transport has been suggested, however directionality and stoichiometry has not yet been elucidated. see PMID: 12770731 and others NJ
THYMt	thymine reversible transport via facilated diffusion	thym[e] <=> thym[c]	-3177.1	3177.1		Transport, extracellular	1	-1000	1000	0	2	3.2.1.18	NOTES:for MDR transport mechanism NJ
TMDK1	thymidine kinase (ATP:thymidine)	atp[c] + 2 h[c] + thymd[c] -> adp[c] + dtmp[c]	(7084.1) or (7083.1)	7083.1 7084.1		Nucleotide interconversion	0	0	1000	0	2	3.2.1.18	NOTES:unknown mechanism, however glucuronidated metabolites need to get out of the cell NJ
TMDPP	thymidine phosphorylase	pi[c] + thymd[c] <=> 2dr1p[c] + thym[c]	-1890.1	1890.1		Pyrimidine catabolism	1	-1000	1000	0	2	2.4.99.9	NOTES:specific mechanism not known, proton dependence for trans-mit transport has been suggested, however directionality and stoichiometry has not yet been elucidated. see PMID: 12770731 and others NJ
TMDPPK	thiamine-diphosphate kinase	atp[c] + 3 h[c] + thmpp[c] -> adp[c] + thmtp[c]				Thiamine metabolism	0	0	1000	0	4		NOTES:for bile acid secretion into bile NJ	PMID:11850532,PMID:9738950,PMID:9813153
TMDS	thymidylate synthase	dump[c] + mlthf[c] -> dhf[c] + dtmp[c]	-7298.1	7298.1		Nucleotide interconversion	0	0	1000	0	2		NOTES:unknown mechanism, however glucuronidated metabolites need to get out of the cell NJ
TPI	triose-phosphate isomerase	dhap[c] <=> g3p[c]	(7167.1) or (286016.1)	286016.1 7167.1		Glycolysis/gluconeogenesis	1	-1000	1000	0	4		NOTES:NJ	PMID:12507753,PMID:9007731,PMID:9334206
TRDR	thioredoxin reductase (NADPH)	h[c] + nadph[c] + trdox[c] -> nadp[c] + trdrd[c]	(7296.3) or (7296.1) or (7296.4) or (7296.2)	7296.1 7296.2 7296.3 7296.4		Nucleotide interconversion	0	0	1000	0	4		NOTES:electrogenic uptake NJ	PMID:12851823,PMID:8132774
TRDR2	Thioredoxin (ubiquinone 10) reductase (NADPH)	h[c] + nadph[c] + q10[c] -> nadp[c] + q10h2[c]	(7296.1) or (7296.4) or (7296.2) or (7296.3)	7296.1 7296.2 7296.3 7296.4		Miscellaneous	0	0	1000	0	2		NOTES:specific mechanism not known, proton dependence for trans-mit transport has been suggested, however directionality and stoichiometry has not yet been elucidated. see PMID: 12770731 and others NJ
TRDR3	Thioredoxin (ubiquinone 10) reductase (NADH)	h[c] + nadh[c] + q10[c] -> nad[c] + q10h2[c]	(7296.4) or (7296.1) or (7296.3) or (7296.2)	7296.1 7296.2 7296.3 7296.4		Miscellaneous	0	0	1000	0	4		NOTES:NJ	PMID:11535246,PMID:8185618
TRDRm	thioredoxin reductase (NADPH)	h[m] + nadph[m] + trdox[m] -> nadp[m] + trdrd[m]	(114112.1) or (10587.1) or (10587.3) or (10587.2)	10587.1 10587.2 10587.3 114112.1		Nucleotide interconversion	0	0	1000	0	4		NOTES:TV (5/4/05) Voet p.571	PMID:3170610,PMID:7601336
TRIOK	triokinase	atp[c] + 2 h[c] + glyald[c] -> adp[c] + g3p[c]				Fructose and mannose metabolism	0	0	1000	0	4		NOTES:TV Ruzicka F, JBC, 1977	PMID:10444348,PMID:12049629
TTDCAtr	tetradecanoate (transport)	ttdca[e] <=> ttdca[c]				Transport, extracellular	1	-1000	1000	0	4		NOTES:NCD
TYRTA	tyrosine transaminase	akg[c] + tyr_L[c] <=> 34hpp[c] + glu_L[c]	-2805.1	2805.1		Tyrosine metabolism	1	-1000	1000	0	0		NOTES:no high energy phosphate compounds found associated w/ rxn NJ	PMID:15175005
UAGALDP	UDP-N-acetylgalactosamine diphosphorylase	h[c] + acgal1p[c] + utp[c] -> ppi[c] + udpacgal[c]				Aminosugar metabolism	0	0	1000	0	2	1.5.99.6	NOTES:NCD. 10620320 - expression, fluorescence; 17084997 - biochemical	PMID:10620320,PMID:17084996,PMID:17084997
UDPACGALtl	udpacgal intracellular transport	udpacgal[c] <=> udpacgal[l]				Transport, lysosomal	1	-1000	1000	0	4	2.5.1.16	NOTES:NCD
UDPDOLPT_L	UDPglucose:dolichyl-phosphate beta-D-glucosyltransferase (liver)	0.1 dolp_L[c] + udpg[c] -> udp[c] + 0.1 dolglcp_L[c]	-29880.1	29880.1		N-glycan synthesis	0	0	1000	0	1	1.15.1.1	NOTES:NCD
UDPDOLPT_U	UDPglucose:dolichyl-phosphate beta-D-glucosyltransferase (uterus)	0.1 dolp_U[c] + udpg[c] -> udp[c] + 0.1 dolglcp_U[c]	-29880.1	29880.1		N-glycan synthesis	0	0	1000	0	1	1.15.1.1	NOTES:
UDPGALt2g	UDPgalactose transport (Golgi)	udpgal[c] -> udpgal[g]				Transport, golgi apparatus	0	0	1000	0	1	1.15.1.1	NOTES:
UDPGALtg	UDP-Gal Golgi transport via CMP antiport	udpgal[c] + ump[g] <=> udpgal[g] + ump[c]	-7355.1	7355.1		Transport, golgi apparatus	1	-1000	1000	0	1	1.15.1.1	NOTES:
UDPGLCAter	UDPGlcA endoplasmic reticulum transport via UMP antiport	ump[c] + udpglcur[r] <=> udpglcur[c] + ump[r]	-23169.1	23169.1		Transport, endoplasmic reticular	1	-1000	1000	0	1	2.5.1.22	NOTES:
UDPGLCter	UDP-Glc endoplasmic reticulum transport via CMP antiport	udpg[c] + ump[r] <=> ump[c] + udpg[r]				Transport, endoplasmic reticular	1	-1000	1000	0	1		NOTES:
UDPtl	udp intracellular transport	udp[c] <=> udp[l]				Transport, lysosomal	1	-1000	1000	0	1		NOTES:
UGALNACtg	UDP-GalNAc Golgi transport via CMP antiport	ump[g] + udpacgal[c] <=> udpacgal[g] + ump[c]	-7355.1	7355.1		Transport, golgi apparatus	1	-1000	1000	0	1		NOTES:
UGLCNACtg	UDP-GlcNAc Golgi transport via CMP antiport	uacgam[c] + ump[g] <=> uacgam[g] + ump[c]	-11046.1	11046.1		Transport, golgi apparatus	1	-1000	1000	0	1	6.2.1.4	NOTES:
UGLT	UDPglucose--hexose-1-phosphate uridylyltransferase	gal1p[c] + udpg[c] <=> udpgal[c] + g1p[c]	(2592.1) or (2592.3) or (2592.2)	2592.1 2592.2 2592.3		Galactose metabolism	1	-1000	1000	0	1	6.2.1.5	NOTES:
UMPtr	UMP transport (ER)	ump[c] <=> ump[r]				Transport, endoplasmic reticular	1	-1000	1000	0	1		NOTES:
UNK2	2-keto-4-methylthiobutyrate transamination	2 h[c] + gln_L[c] + 2kmb[c] -> glu_L[c] + met_L[c]				Arginine and Proline Metabolism	0	0	1000	0	1	2.2.1.2	NOTES:
UNK3	2-keto-4-methylthiobutyrate transamination	glu_L[c] + 2kmb[c] -> akg[c] + met_L[c]				Arginine and Proline Metabolism	0	0	1000	0	1		NOTES:
URAt	uracil transport via facilated diffusion	ura[e] <=> ura[c]	-3177.1	3177.1		Transport, extracellular	1	-1000	1000	0	1		NOTES:
URATEt	urate export from cytosol	urate[c] -> urate[e]				Transport, extracellular	0	0	1000	0	1		NOTES:
URIDK2m	uridylate kinase (dUMP), mitochondrial	atp[m] + dump[m] <=> h[m] + adp[m] + dudp[m]				Nucleotide interconversion	1	-1	1	0	1		NOTES:
URIt	uridine facilated transport in cytosol	uri[e] <=> uri[c]	(3177.1) or (2030.1)	2030.1 3177.1		Transport, extracellular	1	-1000	1000	0	1		NOTES:
UROLACer	uronolactonase, endoplasmic reticulum	h[r] + glcur[r] <=> h2o[r] + glac[r]				Vitamin C metabolism	1	-1000	1000	0	1		NOTES:
VACCt	fatty acid transport via diffusion	vacc[e] <=> vacc[c]				Transport, extracellular	1	-1000	1000	0	1		NOTES:
VALt5m	Valine reversible mitochondrial transport	val_L[c] <=> val_L[m]				Transport, mitochondrial	1	-1000	1000	0	1	1.6.1.2	NOTES:
VALTAm	valine transaminase, mitochondiral	akg[m] + val_L[m] <=> glu_L[m] + 3mob[m]	-587.1	587.1		Valine, leucine, and isoleucine metabolism	1	-1000	1000	0	1	3.6.1.28	NOTES:
VALtec	L-valine transport via diffusion (extracellular to cytosol)	val_L[e] <=> val_L[c]	(8501.1) or (124935.1)	124935.1 8501.1		Transport, extracellular	1	-1000	1000	0	1		NOTES:
VITD3t	Vitamin D3 release	vitd3[c] -> vitd3[e]				Transport, extracellular	0	0	1000	0	1		NOTES:
VITD3t2	Vitamin D3 uptake	vitd3[e] -> vitd3[c]				Transport, extracellular	0	0	1000	0	1		NOTES:
VITD3tm	Vitamin D3 transport from mitochondria	vitd3[m] -> vitd3[c]				Transport, mitochondrial	0	0	1000	0	1		NOTES:
VITD3tm3	Vitamin D3 transport in mitochondria	vitd3[c] -> vitd3[m]				Transport, mitochondrial	0	0	1000	0	1	2.4.2.4	NOTES:
XOL7AONEtr	lipid, flip-flop intracellular transport	xol7aone[c] <=> xol7aone[r]				Transport, endoplasmic reticular	1	-1000	1000	0	1	2.7.6.2	NOTES:
XOLDIOLONEt	lipid, flip-flop intracellular transport	xoldiolone[c] <=> xoldiolone[r]				Transport, endoplasmic reticular	1	-1000	1000	0	1	2.1.1.45	NOTES:
XOLEST2te	cholesterol ester transporter	xolest2_hs[e] <=> xolest2_hs[c]				Transport, extracellular	1	-1000	1000	0	1	5.3.1.1	NOTES:
XYLt	D-xylose reversible transport	xyl_D[e] <=> xyl_D[c]	-6515.1	6515.1		Transport, extracellular	1	-1000	1000	0	1	1.8.1.9	NOTES:
XYLtly	Xylose efflux from lysosome	xyl_D[l] -> xyl_D[c]				Transport, lysosomal	0	0	1000	0	1	1.8.1.9	NOTES:
XYLTt	Xylitol transport via passive diffusion	xylt[e] <=> xylt[c]				Transport, extracellular	1	-1000	1000	0	1	1.8.1.9	NOTES:
XYLUR	xylulose reductase	h[c] + nadph[c] + xylu_L[c] <=> nadp[c] + xylt[c]	-51181.1	51181.1		Pentose phosphate pathway	1	-1000	1000	0	1	1.8.1.9	NOTES:
YVITEt	gamma-Tocopherol (Vit. E) transport	yvite[e] -> yvite[c]				Transport, extracellular	0	0	1000	0	1	2.7.1.28	NOTES:
r0010	hydrogen-peroxide:hydrogen-peroxide oxidoreductase EC:1.11.1.6	2 h2o2[c] -> 2 h2o[c] + o2[c]	(25841.1) or (847.1)	25841.1 847.1		ROS detoxification	0	0	1000	0	1		NOTES:
r0013	beta-N-acetylhexosaminidase Aminosugars metabolism EC:3.2.1.52	h2o[l] + HC00822[l] -> 2 acgam[l]	(3073.1) or (3074.1)	3073.1 3074.1		Aminosugar metabolism	0	0	1000	0	1	2.6.1.5	NOTES:
r0016	Fe(II):oxygen oxidoreductase Porphyrin and chlorophyll metabolism EC:1.16.3.1	4 h[e] + 4 fe2[e] + o2[e] -> 2 h2o[e] + 4 fe3[e]	(1356.1) or (2495.1) or (2509.1) or (94033.1) or (84343.1)	1356.1 2495.1 2509.1 84343.1 94033.1		Miscellaneous	0	0	1000	0	1		NOTES:
r0022	glutathione:NAD+ oxidoreductase Glutamate metabolism EC:1.8.1.7	nad[m] + 2 gthrd[m] <=> h[m] + nadh[m] + gthox[m]	(AA532636.1) or (2936.1)	2936.1 AA532636.1		Glutathione metabolism	1	-1000	1000	0	1		NOTES:
r0028	ATP pyrophosphohydrolase Purine metabolism EC:3.6.1.5	h2o[c] + adp[c] -> 4 h[c] + pi[c] + amp[c]				Purine catabolism	0	0	1000	0	1	2.4.1.117	NOTES:
r0051	AMP:pyrophosphate phosphoribosyltransferase Purine metabolism EC:2.4.2.7	amp[e] + ppi[e] <=> ade[e] + prpp[e]	(AI769281.1) or (30833.1) or (93034.1) or (22978.1) or (51251.1) or (4907.1) or (56953.1) or (57786.1) or (57665.1)	22978.1 30833.1 4907.1 51251.1 56953.1 57665.1 57786.1 93034.1 AI769281.1		Purine catabolism	1	-1000	1000	0	1	2.4.1.117	NOTES:
r0060	L-serine ammonia-lyase Glycine, serine and threonine metabolism EC:4.3.1.17	ser_L[c] -> nh4[c] + pyr[c]				Cysteine Metabolism	0	0	1000	0	1	5.1.3.2	NOTES:
r0086	2-Oxoglutaramate amidohydrolase Glutamate metabolism EC:3.5.1.3	h2o[m] + HC00591[m] -> akg[m] + nh4[m]	-56954.1	56954.1		Urea cycle	0	0	1000	0	1		NOTES:
r0093	UDPglucose pyrophosphohydrolase Pyrimidine metabolism / Starch and sucrose metabolism EC:3.6.1.45	h2o[e] + udpg[e] -> 2 h[e] + ump[e] + g1p[e]	-56954.1	56954.1		Starch and sucrose metabolism	0	0	1000	0	1		NOTES:
r0127	L-Asparagine amidohydrolase Alanine and aspartate metabolism / Cyanoamino acid metabolism / Nitrogen metabolism EC:3.5.1.1 EC:3.5.1.38	h2o[c] + asn_L[c] -> nh4[c] + asp_L[c]	-2643.1	2643.1		Alanine and aspartate metabolism	0	0	1000	0	1		NOTES:
r0130	gamma-glutamyltranspeptidase Glutathione metabolism EC:3.4.11.4	h2o[e] + gthrd[e] <=> cgly[e] + glu_L[e]	(LOC374569.1)	LOC374569.1		Glutathione metabolism	1	-1000	1000	0	1		NOTES:
r0139	CDP diphosphohydrolase Pyrimidine metabolism EC:3.6.1.5	h2o[e] + cdp[e] <=> h[e] + pi[e] + cmp[e]	(AI222095.1) or (AI697028.1) or (D87002.1) or (2678.1) or (728441.1) or (2687.1) or (2686.1) or (728226.1) or (NM_013421.1)	2678.1 2686.1 2687.1 728226.1 728441.1 AI222095.1 AI697028.1 D87002.1 NM_013421.1		Pyrimidine catabolism	1	-1000	1000	0	1		NOTES:
r0145	L-Arginine,NADPH:oxygen oxidoreductase (nitric-oxide-forming) Arginine and proline metabolism EC:1.14.13.39	3 o2[c] + nadph[c] + 2 arg_L[c] -> 2 h2o[c] + h[c] + nadp[c] + 2 citr_L[c] + 2 no[c]	-6821.1	6821.1		Arginine and Proline Metabolism	0	0	1000	0	1		NOTES:
r0149	CTP diphosphohydrolase Pyrimidine metabolism EC:3.6.1.5	h2o[e] + ctp[e] <=> h[e] + pi[e] + cdp[e]	(285973.1) or (D29675.1) or (4842.1) or (NOS2A.1) or (4846.1)	285973.1 4842.1 4846.1 D29675.1 NOS2A.1		Pyrimidine catabolism	1	-1000	1000	0	1	2.7.7.12	NOTES:
r0157	L-Glutamine:pyruvate aminotransferase Glutamate metabolism EC:2.6.1.15	pyr[m] + gln_L[m] -> ala_L[m] + HC00591[m]	(AA502753.1) or (1503.1) or (56474.1)	1503.1 56474.1 AA502753.1		Urea cycle	0	0	1000	0	1	2.7.4.14	NOTES:
r0160	L-Serine:pyruvate aminotransferase Glycine, serine and threonine metabolism EC:2.6.1.51	pyr[c] + ser_L[c] -> ala_L[c] + hpyr[c]	-790.1	790.1		Glycine, serine, alanine and threonine metabolism	0	0	1000	0	1		NOTES:
r0181	ITP diphosphohydrolase Purine metabolism EC:3.6.1.5	h2o[e] + itp[e] <=> h[e] + pi[e] + idp[e]	(AA081045.1) or (AI620219.1) or (220.1) or (219.1) or (217.1) or (218.1) or (224.1) or (221.1) or (222.1) or (501.1) or (223.1) or (AU149534.1) or (T83654.1) or (U37519.1)	217.1 218.1 219.1 220.1 221.1 222.1 223.1 224.1 501.1 AA081045.1 AI620219.1 AU149534.1 T83654.1 U37519.1		Purine catabolism	1	-1000	1000	0	1		NOTES:
r0193	L-Cysteine L-homocysteine-lyase (deaminating) Cysteine metabolism EC:4.4.1.1	h2o[c] + cys_L[c] <=> nh4[c] + h[c] + pyr[c] + HC00250[c]				Cysteine Metabolism	1	-1000	1000	0	1		NOTES:
r0210	L-Serine hydro-lyase (adding homocysteine) Glycine, serine and threonine metabolism EC:4.2.1.22	h[c] + ser_L[c] + HC00250[c] -> h2o[c] + cys_L[c]				Methionine and cysteine metabolism	0	0	1000	0	1		NOTES:
r0281	Putrescine:oxygen oxidoreductase (deaminating) Urea cycle and metabolism of amino groups EC:1.4.3.6	h2o[e] + o2[e] + ptrc[e] -> nh4[e] + h2o2[e] + 4abutn[e]	-22934.1	22934.1		Methionine and cysteine metabolism	0	0	1000	0	1		NOTES:
r0310	Palmitoyl-CoA:oxygen 2-oxidoreductase Fatty acid metabolism EC:1.3.3.6 EC:1.3.99.3	pmtcoa[m] + q10[m] -> hdd2coa[m] + q10h2[m]				Fatty acid oxidation	0	0	1000	0	1		NOTES:
r0311	Palmitate:CoA ligase (AMP-forming) Fatty acid metabolism EC:6.2.1.3	atp[r] + coa[r] + hdca[r] -> amp[r] + h[r] + ppi[r] + pmtcoa[r]	(30.1) or (10449.1) or (38.1) or (39.1) or (3032.1) or (4645.1)	10449.1 30.1 3032.1 38.1 39.1 4645.1		Fatty acid oxidation	0	0	1000	0	1	3.1.1.19	NOTES:
r0321	Acetoacetate:CoA ligase (AMP-forming) Butanoate metabolism EC:6.2.1.16	coa[m] + acac[m] + atp[m] -> h[m] + aacoa[m] + amp[m] + ppi[m]	(AA664770.1) or (AI684467.1) or (8833.1)	8833.1 AA664770.1 AI684467.1		Cholesterol metabolism	0	0	1000	0	1		NOTES:
r0360	Glycolysis / Glyconeogenesis EC:2.7.1.1	man[c] + itp[c] -> h[c] + idp[c] + man6p[c]	(65985.1) or (R39999.1)	65985.1 R39999.1		Fructose and mannose metabolism	0	0	1000	0	1		NOTES:
r0363	Glycolysis / Glyconeogenesis EC:2.7.1.1	itp[c] + gam[c] -> h[c] + idp[c] + gam6p[c]				Aminosugar metabolism	0	0	1000	0	1	2.6.1.42	NOTES:
r0364	Glycolysis / Glyconeogenesis EC:2.7.1.1	datp[c] + gam[c] -> h[c] + gam6p[c] + dadp[c]				Aminosugar metabolism	0	0	1000	0	1		NOTES:
r0377	ATP:deoxycitidine 5-phosphotransferase Pyrimidine metabolism EC:2.7.1.74	atp[c] + 2 h[c] + dcyt[c] -> adp[c] + dcmp[c]	(AI653169.1) or (203.1) or (204.1) or (205.1) or (206.1) or (26289.1) or (122481.1) or (AW277253.1)	122481.1 203.1 204.1 205.1 206.1 26289.1 AI653169.1 AW277253.1		Pyrimidine catabolism	0	0	1000	0	1		NOTES:
r0388	Pyridoxamine:oxygen oxidoreductase (deaminating) Vitamin B6 metabolism EC:1.4.3.5	h2o[c] + o2[c] + pydam[c] -> h2o2[c] + nh4[c] + pydx[c]				Vitamin B6 metabolism	0	0	1000	0	1		NOTES:
r0389	Pyridoxine:oxygen oxidoreductase (deaminating) Vitamin B6 metabolism EC:1.1.3.12	o2[c] + pydxn[c] -> h2o2[c] + pydx[c]				Vitamin B6 metabolism	0	0	1000	0	1		NOTES:
r0391	Nicotinate D-ribonucleotide:pyrophosphate phosphoribosyltransferase Nicotinate and nicotinamide metabolism EC:2.4.2.11	ppi[c] + nicrnt[c] <=> h[c] + prpp[c] + nac[c]				NAD metabolism	1	-1000	1000	0	1		NOTES:
r0395	Hypoxanthine:oxygen oxidoreductase Purine metabolism EC:1.17.3.2	h2o[c] + o2[c] + hxan[c] -> h2o2[c] + xan[c]				Nucleotide interconversion	0	0	1000	0	1		NOTES:
r0398	NADPH:6,7-dihydropteridine oxidoreductase Folate biosynthesis EC:1.5.1.34	h[c] + nadph[c] + dhbpt[c] -> nadp[c] + thbpt[c]	(5160.1) or (5161.1) or (5162.1)	5160.1 5161.1 5162.1		Tetrahydrobiopterin metabolism	0	0	1000	0	1		NOTES:
r0399	L-Phenylalanine,tetrahydrobiopterin:oxygen oxidoreductase (4-hydroxylating) Phenylalanine, tyrosine and tryptophan biosynthesis EC:1.14.16.1	o2[c] + thbpt[c] + phe_L[c] -> h2o[c] + dhbpt[c] + tyr_L[c]	(4967.1) or (55753.1)	4967.1 55753.1		Tetrahydrobiopterin metabolism	0	0	1000	0	1		NOTES:
r0402	Tetrahydrobiopterin:NADP+ oxidoreductase Folate biosynthesis EC:1.1.1.153	h[c] + nadph[c] + HC01254[c] -> nadp[c] + thbpt[c]	-6576.1	6576.1		Tetrahydrobiopterin metabolism	0	0	1000	0	1		NOTES:
r0410	2-Deoxyguanosine 5-triphosphate pyrophosphohydrolase Purine metabolism EC:3.6.1.19	h2o[e] + dgtp[e] <=> h[e] + dgmp[e] + ppi[e]				Pyrimidine catabolism	1	-1000	1000	0	1		NOTES:
r0443	Palmitoyl-CoA:L-carnitine O-palmitoyltransferase Fatty acid metabolism EC:2.3.1.21	arachdcoa[x] + crn[x] -> coa[x] + arachdcrn[x]	(AI971036.1) or (3417.1) or (3418.1)	3417.1 3418.1 AI971036.1		Fatty acid oxidation	0	0	1000	0	1		NOTES:
r0456	ATP:deoxyguanosine 5-phosphotransferase Purine metabolism EC:2.7.1.113	atp[c] + 2 h[c] + dgsn[c] -> adp[c] + dgmp[c]	(AA614647.1) or (1120.1) or (1374.1) or (1375.1) or (126129.1) or (1376.1)	1120.1 126129.1 1374.1 1375.1 1376.1 AA614647.1		Nucleotide interconversion	0	0	1000	0	1	1.1.1.10	NOTES:
r0463	(S)-3-Hydroxy-3-methylglutaryl-CoA acetoacetyl-CoA-lyase (CoA-acetylating) Synthesis and degradation of ketone bodies / Valine, leucine and isoleucine degradation / Butanoate metabolism EC:2.3.3.10	h[x] + coa[x] + hmgcoa[x] <=> accoa[x] + aacoa[x] + h2o[x]				Cholesterol metabolism	1	-1000	1000	0	1		NOTES:
r0472	2-Deoxyadenosine 5-diphosphate:oxidized-thioredoxin 2-oxidoreductase Purine metabolism EC:1.17.4.1	h2o[c] + dgtp[c] + trdox[c] <=> gtp[c] + trdrd[c]				Nucleotide interconversion	1	0	0	0	1		NOTES:
r0475	2-Deoxyadenosine 5-diphosphate:oxidized-thioredoxin 2-oxidoreductase Purine metabolism EC:1.17.4.1	h2o[c] + dutp[c] + trdox[c] <=> utp[c] + trdrd[c]				Nucleotide interconversion	1	-1000	1000	0	1		NOTES:
r0488	(R)-Mevalonate:NADP+ oxidoreductase (CoA acylating) Biosynthesis of steroids EC:1.1.1.34	2 nadp[c] + coa[c] + mev_R[c] <=> 2 h[c] + 2 nadph[c] + hmgcoa[c]				Cholesterol metabolism	1	-1000	1000	0	1		NOTES:
r0494	dTDP diphosphohydrolase Pyrimidine metabolism EC:3.6.1.5	h2o[e] + dtdp[e] <=> h[e] + pi[e] + dtmp[e]				Pyrimidine catabolism	1	-1000	1000	0	1		NOTES:
r0497	dTTP nucleotidohydrolase Pyrimidine metabolism EC:3.6.1.39	h2o[e] + dttp[e] <=> h[e] + pi[e] + dtdp[e]	(4967.1) or (55753.1)	4967.1 55753.1		Pyrimidine catabolism	1	-1000	1000	0	1		NOTES:
r0502	xanthine:NAD+ oxidoreductase Purine metabolism EC:1.17.1.4	h2o[c] + nad[c] + xan[c] -> h[c] + nadh[c] + urate[c]	(1716.1) or (NM_001929.1)	1716.1 NM_001929.1		Purine catabolism	0	0	1000	0	1		NOTES:
r0509	Succinate:ubiquinone oxidoreductase Citrate cycle (TCA cycle) EC:1.3.5.1	q10[m] + succ[m] -> q10h2[m] + fum[m]				Citric acid cycle	0	0	0	0	1		NOTES:
r0512	Dihydrofolate:NAD+ oxidoreductase Folate biosynthesis EC:1.5.1.3	nad[c] + dhf[c] <=> nadh[c] + fol[c]	(BE966236.1) or (6240.1) or (6241.1) or (50484.1)	50484.1 6240.1 6241.1 BE966236.1		Folate metabolism	1	-1000	1000	0	1		NOTES:
r0527	Nicotinamide-D-ribonucleotide amidohydrolase Nicotinate and nicotinamide metabolism EC:3.5.1.42	h2o[c] + nmn[c] <=> nh4[c] + nicrnt[c]				NAD metabolism	1	-1000	1000	0	1		NOTES:
r0578	ATP:pantothenate 4-phosphotransferase Pantothenate and CoA biosynthesis EC:2.7.1.33	atp[c] + 2 h[c] + ptth[c] <=> adp[c] + pan4p[c]	-8879.1	8879.1		CoA synthesis	1	-1000	1000	0	1		NOTES:
r0580	N-((R)-Pantothenoyl)-L-cysteine carboxy-lyase Pantothenate and CoA biosynthesis EC:4.1.1.30	h[c] + HC01231[c] -> co2[c] + ptth[c]	(AD000092.1) or (2639.1)	2639.1 AD000092.1		CoA synthesis	0	0	1000	0	1		NOTES:
r0603	(S)-2-methylbutanoyl-CoA:acceptor 2,3-oxidoreductase Valine, leucine and isoleucine degradation EC:1.3.99.12	2mbcoa[m] + q10[m] -> 2mb2coa[m] + q10h2[m]	(AW299740.1) or (1737.1) or (J03866.1)	1737.1 AW299740.1 J03866.1		Valine, leucine, and isoleucine metabolism	0	0	1000	0	1		NOTES:
r0652	trans-Tetradec-2-enoyl-CoA reductase Fatty acid elongation in mitochondria EC:1.3.1.38	nadp[m] + tdcoa[m] <=> h[m] + nadph[m] + HC01412[m]	(10637.1) or (5831.1) or (29920.1) or (65263.1)	10637.1 29920.1 5831.1 65263.1		Fatty acid oxidation	1	-1000	1000	0	1		NOTES:
r0653	myristoyl-CoA:acetylCoA C-myristoyltransferase Fatty acid elongation in mitochondria / Fatty acid metabolism EC:2.3.1.16	coa[m] + 3ohdcoa[m] -> accoa[m] + tdcoa[m]				Fatty acid oxidation	0	0	1000	0	1		NOTES:
r0655	3-Methylbutanoyl-CoA:(acceptor) 2,3-oxidoreductase Valine, leucine and isoleucine degradation EC:1.3.99.10	ivcoa[m] + q10[m] -> 3mb2coa[m] + q10h2[m]	(10637.1) or (5831.1) or (29920.1) or (65263.1)	10637.1 29920.1 5831.1 65263.1		Valine, leucine, and isoleucine metabolism	0	0	1000	0	1		NOTES:
r0660	(S)-3-Hydroxydodecanoyl-CoA hydro-lyase Fatty acid elongation in mitochondria / Fatty acid metabolism EC:4.2.1.17	HC01401[m] <=> h2o[m] + dd2coa[m]	(10637.1) or (5831.1) or (29920.1) or (65263.1)	10637.1 29920.1 5831.1 65263.1		Fatty acid oxidation	1	-1000	1000	0	1		NOTES:
r0661	(S)-3-Hydroxydodecanoyl-CoA hydro-lyase Fatty acid elongation in mitochondria / Fatty acid metabolism EC:4.2.1.17	h2o[x] + dd2coa[x] -> HC01401[x]				Fatty acid oxidation	0	0	1000	0	1		NOTES:
r0671	(R)-4-Phosphopantothenate:L-cysteine ligase EC:6.3.2.5	cys_L[c] + ctp[c] + 4ppan[c] -> h[c] + ppi[c] + cmp[c] + 4ppcys[c]	(2717.1) or (6173.1)	2717.1 6173.1		CoA synthesis	0	0	1000	0	1		NOTES:
r0673	6-Lactoyl-5,6,7,8-tetrahydropterin:NADP+ 2-oxidoreductase Folate biosynthesis EC:1.1.1.220	h[c] + nadph[c] + 6pthp[c] -> nadp[c] + HC01254[c]				Tetrahydrobiopterin metabolism	0	0	1000	0	1		NOTES:
r0679	ATP:pantothenate 4-phosphotransferase Pantothenate and CoA biosynthesis EC:2.7.1.33	atp[c] + 2 h[c] + HC01231[c] <=> adp[c] + 4ppcys[c]	(30.1) or (10449.1) or (3032.1) or (4645.1)	10449.1 30.1 3032.1 4645.1		CoA catabolism	1	-1000	1000	0	1		NOTES:
r0714	(S)-3-Hydroxyhexadecanoyl-CoA:NAD+ oxidoreductase Fatty acid elongation in mitochondria / Fatty acid metabolism EC:1.1.1.211 EC:1.1.1.35	nad[m] + HC01397[m] -> h[m] + nadh[m] + 3ohdcoa[m]				Fatty acid oxidation	0	0	1000	0	1		NOTES:
r0723	(S)-3-Hydroxydodecanoyl-CoA:NAD+ oxidoreductase Fatty acid elongation in mitochondria / Fatty acid metabolism EC:1.1.1.211 EC:1.1.1.35	nad[x] + HC01401[x] -> h[x] + nadh[x] + 3oddcoa[x]	(AA177072.1) or (2194.1) or (54995.1)	2194.1 54995.1 AA177072.1		Fatty acid oxidation	0	0	1000	0	1	3.6.1.1	NOTES:
r0724	Decanoyl-CoA:acetyl-CoA C-acyltransferase Fatty acid elongation in mitochondria / Fatty acid metabolism EC:2.3.1.16	accoa[m] + dcacoa[m] <=> coa[m] + 3oddcoa[m]	(AI924226.1) or (53354.1) or (80025.1) or (79646.1) or (55229.1) or (100128062.1)	100128062.1 53354.1 55229.1 79646.1 80025.1 AI924226.1		Fatty acid oxidation	1	-1000	1000	0	1	1.11.1.6	NOTES:
r0727	(S)-Hydroxydecanoyl-CoA:NAD+ oxidoreductase Fatty acid elongation in mitochondria / Fatty acid metabolism EC:1.1.1.211 EC:1.1.1.35	nad[x] + HC01403[x] -> h[x] + nadh[x] + 3odcoa[x]				Fatty acid oxidation	0	0	1000	0	1	3.2.1.52	NOTES:
r0729	(S)-Hydroxydecanoyl-CoA hydro-lyase Fatty acid elongation in mitochondria / Fatty acid metabolism EC:4.2.1.17	h2o[x] + HC01414[x] -> HC01403[x]				Fatty acid oxidation	0	0	1000	0	1	1.16.3.1	NOTES:
r0780	4,4-dimethyl-5a-cholesta-8,24-dien-3b-ol:NADP+ D14-oxidoreductase Biosynthesis of steroids EC:1.3.1.70	44mzym[r] + nadp[r] <=> h[r] + 44mctr[r] + nadph[r]	(30.1) or (10449.1) or (3032.1) or (4645.1)	10449.1 30.1 3032.1 4645.1		Cholesterol metabolism	1	-1000	1000	0	1	1.8.1.7	NOTES:
r0787	3-sn-phosphatidate phosphohydrolase Sphingolipid metabolism EC:3.1.3.4	h2o[c] + sph1p[c] -> pi[c] + sphgn[c]	(124.1) or (125.1) or (128.1) or (130.1) or (131.1) or (AI291895.1) or (M68895.1) or (X63359.1)	124.1 125.1 128.1 130.1 131.1 AI291895.1 M68895.1 X63359.1		Sphingolipid metabolism	0	0	1000	0	1	1.8.1.9	NOTES:
r0813	ATP-binding Cassette (ABC) TCDB:3.A.1.208.9	h2o[r] + atp[r] + bildglcur[r] -> adp[r] + bildglcur[e] + 2 h[r] + pi[r]	-2194.1	2194.1		Transport, extracellular	0	0	1000	0	1	3.6.1.5	NOTES:
r0838	Free diffusion	nh4[c] <=> nh4[m]	-26275.1	26275.1		Transport, mitochondrial	1	-1000	1000	0	1	2.7.1.24	NOTES:
r0853	Facilitated diffusion	atp[c] + h[c] + pi[m] -> pi[c] + atp[m]				Purine catabolism	0	0	1000	0	1	2.4.2.7	NOTES:
r0908	Postulated transport reaction	acgam[c] <=> acgam[r]				Transport, endoplasmic reticular	1	-1000	1000	0	1	1.2.1.49	NOTES:
r0909	Transport reaction	acgam[l] <=> acgam[r]				Transport, endoplasmic reticular	1	-1000	1000	0	1	4.3.1.17	NOTES:
r0911	Facilitated diffusion	glu_L[m] + pro_L[c] <=> glu_L[c] + pro_L[m]				Transport, mitochondrial	1	-1000	1000	0	1	1.1.1.42	NOTES:
r0926	Postulated transport reaction	3pg[m] -> 3pg[c]				Transport, mitochondrial	0	0	1000	0	1	3.5.1.3	NOTES:
r0936	Transport reaction	hdca[l] -> hdca[r]				Transport, endoplasmic reticular	0	0	1000	0	1	3.6.1.45	NOTES:
r0937	Transport reaction	hdca[l] <=> hdca[c]				Transport, lysosomal	1	-1000	1000	0	1	2.7.1.40	NOTES:
r0954	MCT 1 Transport reaction	mev_R[c] <=> mev_R[x]				Transport, peroxisomal	1	-1000	1000	0	1	3.5.1.38	NOTES:
r0970	Active transport	cholate[c] <=> cholate[r]				Transport, endoplasmic reticular	1	-1000	1000	0	1	3.4.11.4	NOTES:
r0973	Facilitated diffusion	ptth[m] <=> ptth[c]				Transport, mitochondrial	1	-1000	1000	0	1	3.6.1.5	NOTES:
r0986	Vesicular transport	lnlc[l] -> lnlc[r]				Transport, lysosomal	0	0	1000	0	1	1.14.13.39	NOTES:
r0987	Vesicular transport	lnlc[l] <=> lnlc[c]				Transport, lysosomal	1	-1000	1000	0	1	3.6.1.5	NOTES:
r0989	Postulated transport reaction	cholcoa[r] <=> cholcoa[c]				Transport, endoplasmic reticular	1	-1000	1000	0	1	2.6.1.15	NOTES:
r0990	Postulated transport reaction	cholcoa[x] <=> cholcoa[c]				Transport, peroxisomal	1	-1000	1000	0	1	2.6.1.51	NOTES:
r1008	Facilitated diffusion	crn[c] + arachdcrn[x] -> arachdcrn[c] + crn[x]				Transport, mitochondrial	0	0	1000	0	1	3.6.1.19	NOTES:
r1024	Active transport	h2o[r] + atp[r] + xol7aone[r] -> xol7aone[c] + adp[r] + 2 h[r] + pi[r]				Transport, endoplasmic reticular	0	0	1000	0	1	1.1.1.27	NOTES:
r1050	Vesicular transport	chsterol[e] <=> chsterol[c]				Transport, extracellular	1	-1000	1000	0	1	3.6.1.5	NOTES:
r1090	TCDB:2.A.47.1.9 TCDB:2.A.29.7.2	na1[e] + cit[e] -> na1[c] + cit[c]				Transport, extracellular	0	0	1000	0	1	4.4.1.1	NOTES:
r1154	EC:1.2.7.2	coa[m] + nad[m] + 2obut[m] <=> co2[m] + nadh[m] + ppcoa[m]				Propanoate metabolism	1	-1000	1000	0	1	1.1.1.8	NOTES:
r1155	TCDB:2.A.1.13.5 TCDB:2.A.1.13.1	h[c] + 2obut[c] -> h[m] + 2obut[m]				Transport, mitochondrial	0	0	1000	0	1	4.2.1.22	NOTES:
r1254	EC:6.2.1.3	atp[c] + 8 h[c] + coa[c] + strdnc[c] -> amp[c] + ppi[c] + stcoa[c]				Fatty acid oxidation	0	0	1000	0	1	1.1.1.72	NOTES:
r1255	EC:6.2.1.3	atp[r] + coa[r] + ocdcea[r] -> amp[r] + h[r] + ppi[r] + odecoa[r]				Fatty acid oxidation	0	0	1000	0	1	1.1.1.72	NOTES:
r1257	EC:6.2.1.3	atp[r] + coa[r] + lnlc[r] -> amp[r] + h[r] + ppi[r] + lnlccoa[r]				Fatty acid oxidation	0	0	1000	0	1	5.3.1.6	NOTES:
r1259	EC:6.2.1.3	atp[r] + coa[r] + lnlnca[r] -> amp[r] + h[r] + ppi[r] + lnlncgcoa[r]				Fatty acid oxidation	0	0	1000	0	1	1.14.18.2	NOTES:
r1260	EC:6.2.1.3	atp[r] + coa[r] + lnlncg[r] -> amp[r] + h[r] + ppi[r] + lnlncgcoa[r]				Fatty acid oxidation	0	0	1000	0	1	1.7.1.7	NOTES:
r1291	Postulated transport reaction	ppcoa[c] <=> ppcoa[m]				Transport, mitochondrial	1	-1000	1000	0	1	1.4.3.6	NOTES:
r1292	Postulated transport reaction	ppcoa[c] <=> ppcoa[x]				Transport, peroxisomal	1	-1000	1000	0	1	6.3.4.1	NOTES:
r1298	Vesicular transport	lnlncg[l] -> lnlncg[r]				Transport, lysosomal	0	0	1000	0	1	6.2.1.3	NOTES:
r1299	Vesicular transport	lnlncg[c] -> lnlncg[l]				Transport, lysosomal	0	0	1000	0	1	4.2.1.4	NOTES:
r1301	Vesicular transport	ocdcea[l] -> ocdcea[r]				Transport, lysosomal	0	0	1000	0	1	6.2.1.16	NOTES:
r1302	Vesicular transport	ocdcea[l] <=> ocdcea[c]				Transport, lysosomal	1	-1000	1000	0	1	2.7.1.31	NOTES:
r1318	Transport reaction	lnlccoa[c] <=> lnlccoa[r]				Transport, endoplasmic reticular	1	-1000	1000	0	1	2.7.1.31	NOTES:
r1364	Vesicular transport	lnlnca[l] -> lnlnca[r]				Transport, lysosomal	0	0	1000	0	1	2.7.4.11	NOTES:
r1365	Vesicular transport	lnlnca[c] -> lnlnca[l]				Transport, lysosomal	0	0	1000	0	1	2.7.1.1	NOTES:
r1367	Vesicular transport	HC02100[l] -> HC02100[r]				Transport, lysosomal	0	0	1000	0	1	2.7.1.1	NOTES:
r1368	Vesicular transport	dlnlcg[c] -> HC02100[l]				Transport, lysosomal	0	0	1000	0	1	2.7.1.1	NOTES:
r1374	EC:3.2.1.14	h2o[e] + 2 chtn[e] -> 3 HC00822[e]				Aminosugar metabolism	0	0	1000	0	1	2.7.1.1	NOTES:
r1375	Transport reaction	HC00822[e] -> HC00822[l]				Aminosugar metabolism	0	0	1000	0	1	2.7.1.1	NOTES:
r1396	EC:2.3.1.21	ppcoa[c] + crn[c] -> coa[c] + HC02149[c]				Fatty acid oxidation	0	0	1000	0	1	2.7.1.74	NOTES:
r1397	carnitine acetyltransferase EC:2.3.1.7	coa[m] + HC02149[m] -> ppcoa[m] + crn[m]				Fatty acid oxidation	0	0	1000	0	1	1.4.3.5	NOTES:
r1400	Active transport	ppcoa[c] + crn[m] -> ppcoa[m] + crn[c]				Fatty acid oxidation	0	0	1000	0	1	1.1.3.12	NOTES:
r1401	Facilitated diffusion	btcoa[m] + crn[c] -> crn[m] + btcoa[c]	(AA177072.1) or (AA203143.1) or (56894.1) or (56895.1) or (AGPAT7.1) or (AI818585.1) or (AI971023.1) or (1956.1) or (54898.1) or (60481.1) or (79071.1) or (114799.1) or (157570.1) or (8372.1) or (LOC647190.1) or (9926.1) or (129642.1) or (MBOAT5.1) or (79143.1) or (N63787.1) or (54995.1) or (80339.1) or (9197.1) or (6901.1) or (W87865.1)	114799.1 129642.1 157570.1 1956.1 54898.1 54995.1 56894.1 56895.1 60481.1 6901.1 79071.1 79143.1 80339.1 8372.1 9197.1 9926.1 AA177072.1 AA203143.1 AGPAT7.1 AI818585.1 AI971023.1 LOC647190.1 MBOAT5.1 N63787.1 W87865.1		Fatty acid oxidation	0	0	1000	0	1	3.2.1.10	NOTES:
r1427	Mitochondrial Carrier (MC) TCDB:2.A.29.19.1	h[c] + his_L[c] -> h[m] + his_L[m]				Transport, mitochondrial	0	0	1000	0	1	2.4.2.11	NOTES:
r1428	Free diffusion	dhap[c] <=> dhap[x]				Transport, peroxisomal	1	-1000	1000	0	1	1.2.1.3	NOTES:
r1429	Free diffusion	glyc3p[c] <=> glyc3p[x]				Transport, peroxisomal	1	-1000	1000	0	1	1.2.1.3	NOTES:
r1434	Transport reaction	ala_L[c] -> ala_L[m]				Transport, mitochondrial	0	0	1000	0	1	1.17.1.4	NOTES:
r1443	EC:1.3.3.6	ddcacoa[x] + o2[x] -> h2o2[x] + dd2coa[x]				Fatty acid oxidation	0	0	1000	0	1	1.17.3.2	NOTES:
r1445	EC:1.3.3.6	dcacoa[x] + o2[x] -> h2o2[x] + HC01414[x]				Fatty acid oxidation	0	0	1000	0	1	1.5.1.34	NOTES:
r1449	EC:1.3.3.6	q10[m] + tdcoa[m] -> q10h2[m] + HC01412[m]				Fatty acid oxidation	0	0	1000	0	1	1.14.18.2	NOTES:
r1450	EC:1.3.3.6	q10[m] + HC01409[m] -> q10h2[m] + HC01410[m]				Fatty acid oxidation	0	0	1000	0	1	1.1.1.153	NOTES:
r1451	EC:1.3.3.6	q10[m] + dcacoa[m] -> q10h2[m] + dc2coa[m]				Fatty acid oxidation	0	0	1000	0	1	4.1.2.13	NOTES:
r1459	Transport reaction	ppi[c] <=> ppi[n]				Transport, nuclear	1	-1000	1000	0	1	2.7.1.11	NOTES:
r1464	Active transport	pyr[m] + acac[c] <=> pyr[c] + acac[m]				Transport, mitochondrial	1	-1000	1000	0	1	3.6.1.19	NOTES:
r1467	Postulated transport reaction	odecoa[c] <=> odecoa[m]				Transport, mitochondrial	1	-1000	1000	0	1	1.1.1.42	NOTES:
r1488	EC:6.2.1.3	atp[c] + coa[c] + hdcea[c] -> amp[c] + ppi[c] + HC10852[c]				Fatty acid oxidation	0	0	1000	0	1	4.2.1.3	NOTES:
r1527	ATP-binding Cassette (ABC) TCDB:3.A.1.211.1	h2o[c] + atp[c] + HC02175[c] -> adp[c] + h[c] + pi[c] + HC02175[e]	(AI024818.1) or (AI091231.1) or (AI480132.1) or (AI972237.1) or (AL050025.1) or (759.1) or (771.1) or (377677.1) or (23632.1) or (760.1) or (761.1) or (762.1) or (763.1) or (11238.1) or (765.1) or (766.1) or (767.1) or (768.1) or (8883.1) or (R51273.1)	11238.1 23632.1 377677.1 759.1 760.1 761.1 762.1 763.1 765.1 766.1 767.1 768.1 771.1 8883.1 AI024818.1 AI091231.1 AI480132.1 AI972237.1 AL050025.1 R51273.1		Transport, extracellular	0	0	1000	0	1	2.3.1.21	NOTES:
r1538	Anion Exchanger (AE) TCDB:2.A.31.2.8	hco3[e] + 2 na1[e] -> hco3[c] + 2 na1[c]	(BE966236.1) or (6240.1) or (6241.1) or (50484.1)	50484.1 6240.1 6241.1 BE966236.1		Transport, extracellular	0	0	1000	0	1	2.3.1.21	NOTES:
r1639	Amino Acid-Polyamine-Organocation (APC) TCDB:2.A.3.8.1	cys_L[e] + thr_L[c] <=> cys_L[c] + thr_L[e]	-8140.1	8140.1		Transport, extracellular	1	-1000	1000	0	1	2.3.1.21	NOTES:
r1666	Y+LAT2 Utilized transport	lys_L[e] + citr_L[c] <=> lys_L[c] + citr_L[e]	-8140.1	8140.1		Transport, extracellular	1	-1000	1000	0	1	2.7.1.113	NOTES:
r1669	Y+LAT2 Utilized transport	arg_L[e] + citr_L[c] <=> arg_L[c] + citr_L[e]	-8140.1	8140.1		Transport, extracellular	1	-1000	1000	0	1	2.3.3.10	NOTES:
r1672	Y+LAT2 Utilized transport	na1[e] + ala_L[c] + gly[e] -> na1[c] + ala_L[e] + gly[c]	-8140.1	8140.1		Transport, extracellular	0	0	1000	0	1	1.2.1.3	NOTES:
r1673	Y+LAT2 Utilized transport	na1[e] + gln_L[c] + gly[e] -> na1[c] + gln_L[e] + gly[c]	-8140.1	8140.1		Transport, extracellular	0	0	1000	0	1	1.17.4.1	NOTES:
r1674	Y+LAT2 Utilized transport	na1[e] + gly[e] + ser_L[c] -> na1[c] + gly[c] + ser_L[e]	-8140.1	8140.1		Transport, extracellular	0	0	1000	0	1	1.17.4.1	NOTES:
r1675	Y+LAT2 Utilized transport	na1[e] + gly[e] + met_L[c] -> na1[c] + gly[c] + met_L[e]	-8140.1	8140.1		Transport, extracellular	0	0	1000	0	1	1.17.4.1	NOTES:
r1676	Y+LAT2 Utilized transport	na1[e] + gly[e] + trp_L[c] -> na1[c] + gly[c] + trp_L[e]	-8140.1	8140.1		Transport, extracellular	0	0	1000	0	1	1.17.4.1	NOTES:
r1677	Y+LAT2 Utilized transport	na1[e] + gly[e] + phe_L[c] -> na1[c] + gly[c] + phe_L[e]	-8140.1	8140.1		Transport, extracellular	0	0	1000	0	1	2.6.1.22	NOTES:
r1678	Y+LAT2 Utilized transport	na1[e] + gly[e] + tyr_L[c] -> na1[c] + gly[c] + tyr_L[e]	-8140.1	8140.1		Transport, extracellular	0	0	1000	0	1	1.1.1.34	NOTES:
r1679	Y+LAT2 Utilized transport	na1[e] + cys_L[c] + gly[e] -> na1[c] + cys_L[e] + gly[c]	-8140.1	8140.1		Transport, extracellular	0	0	1000	0	1	3.6.1.5	NOTES:
r1680	Y+LAT2 Utilized transport	na1[e] + gly[e] + leu_L[c] -> na1[c] + gly[c] + leu_L[e]	-8140.1	8140.1		Transport, extracellular	0	0	1000	0	1	3.6.1.39	NOTES:
r1681	Y+LAT2 Utilized transport	na1[e] + gly[e] + pro_L[c] -> na1[c] + gly[c] + pro_L[e]	-8140.1	8140.1		Transport, extracellular	0	0	1000	0	1	1.17.1.4	NOTES:
r1682	Y+LAT2 Utilized transport	na1[e] + asn_L[c] + gly[e] -> na1[c] + asn_L[e] + gly[c]	-8140.1	8140.1		Transport, extracellular	0	0	1000	0	1	1.3.5.1	NOTES:
r1683	Y+LAT2 Utilized transport	na1[e] + gly[e] + val_L[c] -> na1[c] + gly[c] + val_L[e]	-8140.1	8140.1		Transport, extracellular	0	0	1000	0	1	1.5.1.3	NOTES:
r1684	Y+LAT2 Utilized transport	na1[e] + gly[e] + thr_L[c] -> na1[c] + gly[c] + thr_L[e]	-8140.1	8140.1		Transport, extracellular	0	0	1000	0	1	3.5.1.42	NOTES:
r1685	Y+LAT2 Utilized transport	na1[e] + gly[e] + hom_L[c] -> na1[c] + gly[c] + hom_L[e]	-8140.1	8140.1		Transport, extracellular	0	0	1000	0	1	1.2.1.3	NOTES:
r1686	Y+LAT2 Utilized transport	na1[e] + gly[e] + ile_L[c] -> na1[c] + gly[c] + ile_L[e]	-8140.1	8140.1		Transport, extracellular	0	0	1000	0	1	1.2.1.8	NOTES:
r1687	Y+LAT2 Utilized transport	na1[e] + ala_L[e] + gly[c] -> na1[c] + ala_L[c] + gly[e]	-8140.1	8140.1		Transport, extracellular	0	0	1000	0	1	1.2.1.8	NOTES:
r1690	Y+LAT2 Utilized transport	na1[e] + ala_L[e] + met_L[c] -> na1[c] + ala_L[c] + met_L[e]	-8140.1	8140.1		Transport, extracellular	0	0	1000	0	1	1.2.1.29	NOTES:
r1691	Y+LAT2 Utilized transport	na1[e] + ala_L[e] + trp_L[c] -> na1[c] + ala_L[c] + trp_L[e]	-8140.1	8140.1		Transport, extracellular	0	0	1000	0	1	1.2.3.1	NOTES:
r1692	Y+LAT2 Utilized transport	na1[e] + ala_L[e] + phe_L[c] -> na1[c] + ala_L[c] + phe_L[e]	-8140.1	8140.1		Transport, extracellular	0	0	1000	0	1	6.2.1.7	NOTES:
r1693	Y+LAT2 Utilized transport	na1[e] + ala_L[e] + tyr_L[c] -> na1[c] + ala_L[c] + tyr_L[e]	-8140.1	8140.1		Transport, extracellular	0	0	1000	0	1	2.7.1.33	NOTES:
r1695	Y+LAT2 Utilized transport	na1[e] + ala_L[e] + leu_L[c] -> na1[c] + ala_L[c] + leu_L[e]	-8140.1	8140.1		Transport, extracellular	0	0	1000	0	1	2.7.1.33	NOTES:
r1696	Y+LAT2 Utilized transport	na1[e] + ala_L[e] + pro_L[c] -> na1[c] + ala_L[c] + pro_L[e]	-8140.1	8140.1		Transport, extracellular	0	0	1000	0	1	4.1.1.30	NOTES:
r1698	Y+LAT2 Utilized transport	na1[e] + ala_L[e] + val_L[c] -> na1[c] + ala_L[c] + val_L[e]	-8140.1	8140.1		Transport, extracellular	0	0	1000	0	1	2.7.7.3	NOTES:
r1700	Y+LAT2 Utilized transport	na1[e] + ala_L[e] + hom_L[c] -> na1[c] + ala_L[c] + hom_L[e]	-8140.1	8140.1		Transport, extracellular	0	0	1000	0	1	1.3.99.12	NOTES:
r1701	Y+LAT2 Utilized transport	na1[e] + ala_L[e] + ile_L[c] -> na1[c] + ala_L[c] + ile_L[e]	-8140.1	8140.1		Transport, extracellular	0	0	1000	0	1	1.5.1.2	NOTES:
r1702	Y+LAT2 Utilized transport	na1[e] + gln_L[e] + gly[c] -> na1[c] + gln_L[c] + gly[e]	-8140.1	8140.1		Transport, extracellular	0	0	1000	0	1	1.5.1.2	NOTES:
r1705	Y+LAT2 Utilized transport	na1[e] + gln_L[e] + met_L[c] -> na1[c] + gln_L[c] + met_L[e]	-8140.1	8140.1		Transport, extracellular	0	0	1000	0	1	3.2.1.23	NOTES:
r1706	Y+LAT2 Utilized transport	na1[e] + gln_L[e] + trp_L[c] -> na1[c] + gln_L[c] + trp_L[e]	-8140.1	8140.1		Transport, extracellular	0	0	1000	0	1	1.3.1.38	NOTES:
r1707	Y+LAT2 Utilized transport	na1[e] + gln_L[e] + phe_L[c] -> na1[c] + gln_L[c] + phe_L[e]	-8140.1	8140.1		Transport, extracellular	0	0	1000	0	1	2.3.2.2	NOTES:
r1708	Y+LAT2 Utilized transport	na1[e] + gln_L[e] + tyr_L[c] -> na1[c] + gln_L[c] + tyr_L[e]	-8140.1	8140.1		Transport, extracellular	0	0	1000	0	1	1.2.1.3	NOTES:
r1710	Y+LAT2 Utilized transport	na1[e] + gln_L[e] + leu_L[c] -> na1[c] + gln_L[c] + leu_L[e]	-8140.1	8140.1		Transport, extracellular	0	0	1000	0	1	1.2.3.1	NOTES:
r1711	Y+LAT2 Utilized transport	na1[e] + gln_L[e] + pro_L[c] -> na1[c] + gln_L[c] + pro_L[e]	-8140.1	8140.1		Transport, extracellular	0	0	1000	0	1	6.2.1.7	NOTES:
r1713	Y+LAT2 Utilized transport	na1[e] + gln_L[e] + val_L[c] -> na1[c] + gln_L[c] + val_L[e]	-8140.1	8140.1		Transport, extracellular	0	0	1000	0	1	1.3.1.38	NOTES:
r1715	Y+LAT2 Utilized transport	na1[e] + gln_L[e] + hom_L[c] -> na1[c] + gln_L[c] + hom_L[e]	-8140.1	8140.1		Transport, extracellular	0	0	1000	0	1	2.3.1.16	NOTES:
r1716	Y+LAT2 Utilized transport	na1[e] + gln_L[e] + ile_L[c] -> na1[c] + gln_L[c] + ile_L[e]	-8140.1	8140.1		Transport, extracellular	0	0	1000	0	1	1.3.99.10	NOTES:
r1717	Y+LAT2 Utilized transport	na1[e] + gly[c] + ser_L[e] -> na1[c] + gly[e] + ser_L[c]	-8140.1	8140.1		Transport, extracellular	0	0	1000	0	1	4.2.1.17	NOTES:
r1720	Y+LAT2 Utilized transport	na1[e] + ser_L[e] + met_L[c] -> na1[c] + ser_L[c] + met_L[e]	-8140.1	8140.1		Transport, extracellular	0	0	1000	0	1	4.2.1.17	NOTES:
r1721	Y+LAT2 Utilized transport	na1[e] + ser_L[e] + trp_L[c] -> na1[c] + ser_L[c] + trp_L[e]	-8140.1	8140.1		Transport, extracellular	0	0	1000	0	1	2.7.7.43	NOTES:
r1722	Y+LAT2 Utilized transport	na1[e] + ser_L[e] + phe_L[c] -> na1[c] + ser_L[c] + phe_L[e]	-8140.1	8140.1		Transport, extracellular	0	0	1000	0	1	6.3.2.5	NOTES:
r1723	Y+LAT2 Utilized transport	na1[e] + ser_L[e] + tyr_L[c] -> na1[c] + ser_L[c] + tyr_L[e]	-8140.1	8140.1		Transport, extracellular	0	0	1000	0	1	1.1.1.220	NOTES:
r1725	Y+LAT2 Utilized transport	na1[e] + ser_L[e] + leu_L[c] -> na1[c] + ser_L[c] + leu_L[e]	-8140.1	8140.1		Transport, extracellular	0	0	1000	0	1	2.7.1.33	NOTES:
r1726	Y+LAT2 Utilized transport	na1[e] + ser_L[e] + pro_L[c] -> na1[c] + ser_L[c] + pro_L[e]	-8140.1	8140.1		Transport, extracellular	0	0	1000	0	1	1.2.1.3	NOTES:
r1728	Y+LAT2 Utilized transport	na1[e] + ser_L[e] + val_L[c] -> na1[c] + ser_L[c] + val_L[e]	-8140.1	8140.1		Transport, extracellular	0	0	1000	0	1	1.1.1.35	NOTES:
r1730	Y+LAT2 Utilized transport	na1[e] + ser_L[e] + hom_L[c] -> na1[c] + ser_L[c] + hom_L[e]	-8140.1	8140.1		Transport, extracellular	0	0	1000	0	1	4.2.1.17	NOTES:
r1731	Y+LAT2 Utilized transport	na1[e] + ser_L[e] + ile_L[c] -> na1[c] + ser_L[c] + ile_L[e]	-8140.1	8140.1		Transport, extracellular	0	0	1000	0	1	1.1.1.35	NOTES:
r1732	Y+LAT2 Utilized transport	na1[e] + gly[c] + met_L[e] -> na1[c] + gly[e] + met_L[c]	-8140.1	8140.1		Transport, extracellular	0	0	1000	0	1	1.1.1.35	NOTES:
r1733	Y+LAT2 Utilized transport	na1[e] + ala_L[c] + met_L[e] -> na1[c] + ala_L[e] + met_L[c]	-8140.1	8140.1		Transport, extracellular	0	0	1000	0	1	2.3.1.16	NOTES:
r1734	Y+LAT2 Utilized transport	na1[e] + gln_L[c] + met_L[e] -> na1[c] + gln_L[e] + met_L[c]	-8140.1	8140.1		Transport, extracellular	0	0	1000	0	1	1.1.1.35	NOTES:
r1735	Y+LAT2 Utilized transport	na1[e] + ser_L[c] + met_L[e] -> na1[c] + ser_L[e] + met_L[c]	-8140.1	8140.1		Transport, extracellular	0	0	1000	0	1	4.2.1.17	NOTES:
r1736	Y+LAT2 Utilized transport	na1[e] + met_L[e] + trp_L[c] -> na1[c] + met_L[c] + trp_L[e]	-8140.1	8140.1		Transport, extracellular	0	0	1000	0	1	1.3.1.38	NOTES:
r1737	Y+LAT2 Utilized transport	na1[e] + met_L[e] + phe_L[c] -> na1[c] + met_L[c] + phe_L[e]	-8140.1	8140.1		Transport, extracellular	0	0	1000	0	1	1.2.1.5	NOTES:
r1738	Y+LAT2 Utilized transport	na1[e] + met_L[e] + tyr_L[c] -> na1[c] + met_L[c] + tyr_L[e]	-8140.1	8140.1		Transport, extracellular	0	0	1000	0	1	1.2.1.5	NOTES:
r1739	Y+LAT2 Utilized transport	na1[e] + cys_L[c] + met_L[e] -> na1[c] + cys_L[e] + met_L[c]	-8140.1	8140.1		Transport, extracellular	0	0	1000	0	1	1.2.1.5	NOTES:
r1740	Y+LAT2 Utilized transport	na1[e] + met_L[e] + leu_L[c] -> na1[c] + met_L[c] + leu_L[e]	-8140.1	8140.1		Transport, extracellular	0	0	1000	0	1	1.2.1.5	NOTES:
r1741	Y+LAT2 Utilized transport	na1[e] + met_L[e] + pro_L[c] -> na1[c] + met_L[c] + pro_L[e]	-8140.1	8140.1		Transport, extracellular	0	0	1000	0	1	4.1.1.37	NOTES:
r1742	Y+LAT2 Utilized transport	na1[e] + asn_L[c] + met_L[e] -> na1[c] + asn_L[e] + met_L[c]	-8140.1	8140.1		Transport, extracellular	0	0	1000	0	1	1.3.1.70	NOTES:
r1743	Y+LAT2 Utilized transport	na1[e] + met_L[e] + val_L[c] -> na1[c] + met_L[c] + val_L[e]	-8140.1	8140.1		Transport, extracellular	0	0	1000	0	1	1.3.1.72	NOTES:
r1744	Y+LAT2 Utilized transport	na1[e] + thr_L[c] + met_L[e] -> na1[c] + thr_L[e] + met_L[c]	-8140.1	8140.1		Transport, extracellular	0	0	1000	0	1	1.1.1.15	NOTES:
r1745	Y+LAT2 Utilized transport	na1[e] + met_L[e] + hom_L[c] -> na1[c] + met_L[c] + hom_L[e]	-8140.1	8140.1		Transport, extracellular	0	0	1000	0	1	3.1.3.4	NOTES:
r1746	Y+LAT2 Utilized transport	na1[e] + met_L[e] + ile_L[c] -> na1[c] + met_L[c] + ile_L[e]	-8140.1	8140.1		Transport, extracellular	0	0	1000	0	1	1.3.1.38	NOTES:
r1747	Y+LAT2 Utilized transport	na1[e] + gly[c] + trp_L[e] -> na1[c] + gly[e] + trp_L[c]	-8140.1	8140.1		Transport, extracellular	0	0	1000	0	1	1.5.1.20	NOTES:
r1748	Y+LAT2 Utilized transport	na1[e] + ala_L[c] + trp_L[e] -> na1[c] + ala_L[e] + trp_L[c]	-8140.1	8140.1		Transport, extracellular	0	0	1000	0	1		NOTES:
r1749	Y+LAT2 Utilized transport	na1[e] + gln_L[c] + trp_L[e] -> na1[c] + gln_L[e] + trp_L[c]	-8140.1	8140.1		Transport, extracellular	0	0	1000	0	1		NOTES:
r1750	Y+LAT2 Utilized transport	na1[e] + ser_L[c] + trp_L[e] -> na1[c] + ser_L[e] + trp_L[c]	-8140.1	8140.1		Transport, extracellular	0	0	1000	0	1		NOTES:
r1751	Y+LAT2 Utilized transport	na1[e] + met_L[c] + trp_L[e] -> na1[c] + met_L[e] + trp_L[c]	-8140.1	8140.1		Transport, extracellular	0	0	1000	0	1		NOTES:
r1752	Y+LAT2 Utilized transport	na1[e] + trp_L[e] + phe_L[c] -> na1[c] + phe_L[e] + trp_L[c]	-8140.1	8140.1		Transport, extracellular	0	0	1000	0	1		NOTES:
r1753	Y+LAT2 Utilized transport	na1[e] + trp_L[e] + tyr_L[c] -> na1[c] + tyr_L[e] + trp_L[c]	-8140.1	8140.1		Transport, extracellular	0	0	1000	0	1		NOTES:
r1754	Y+LAT2 Utilized transport	na1[e] + cys_L[c] + trp_L[e] -> na1[c] + cys_L[e] + trp_L[c]	-8140.1	8140.1		Transport, extracellular	0	0	1000	0	1		NOTES:
r1755	Y+LAT2 Utilized transport	na1[e] + trp_L[e] + leu_L[c] -> na1[c] + leu_L[e] + trp_L[c]	-8140.1	8140.1		Transport, extracellular	0	0	1000	0	1		NOTES:
r1756	Y+LAT2 Utilized transport	na1[e] + trp_L[e] + pro_L[c] -> na1[c] + pro_L[e] + trp_L[c]	-8140.1	8140.1		Transport, extracellular	0	0	1000	0	1		NOTES:
r1757	Y+LAT2 Utilized transport	na1[e] + asn_L[c] + trp_L[e] -> na1[c] + asn_L[e] + trp_L[c]	-8140.1	8140.1		Transport, extracellular	0	0	1000	0	1		NOTES:
r1758	Y+LAT2 Utilized transport	na1[e] + trp_L[e] + val_L[c] -> na1[c] + val_L[e] + trp_L[c]	-8140.1	8140.1		Transport, extracellular	0	0	1000	0	1		NOTES:
r1759	Y+LAT2 Utilized transport	na1[e] + thr_L[c] + trp_L[e] -> na1[c] + thr_L[e] + trp_L[c]	-8140.1	8140.1		Transport, extracellular	0	0	1000	0	1		NOTES:
r1760	Y+LAT2 Utilized transport	na1[e] + trp_L[e] + hom_L[c] -> na1[c] + hom_L[e] + trp_L[c]	-8140.1	8140.1		Transport, extracellular	0	0	1000	0	1		NOTES:
r1761	Y+LAT2 Utilized transport	na1[e] + trp_L[e] + ile_L[c] -> na1[c] + ile_L[e] + trp_L[c]	-8140.1	8140.1		Transport, extracellular	0	0	1000	0	1		NOTES:
r1762	Y+LAT2 Utilized transport	na1[e] + gly[c] + phe_L[e] -> na1[c] + gly[e] + phe_L[c]	-9057.1	9057.1		Transport, extracellular	0	0	1000	0	1		NOTES:
r1763	Y+LAT2 Utilized transport	na1[e] + ala_L[c] + phe_L[e] -> na1[c] + ala_L[e] + phe_L[c]	-9057.1	9057.1		Transport, extracellular	0	0	1000	0	1		NOTES:
r1764	Y+LAT2 Utilized transport	na1[e] + gln_L[c] + phe_L[e] -> na1[c] + gln_L[e] + phe_L[c]	-9057.1	9057.1		Transport, extracellular	0	0	1000	0	1		NOTES:
r1765	Y+LAT2 Utilized transport	na1[e] + ser_L[c] + phe_L[e] -> na1[c] + ser_L[e] + phe_L[c]	-9057.1	9057.1		Transport, extracellular	0	0	1000	0	1		NOTES:
r1766	Y+LAT2 Utilized transport	na1[e] + met_L[c] + phe_L[e] -> na1[c] + met_L[e] + phe_L[c]	-9057.1	9057.1		Transport, extracellular	0	0	1000	0	1		NOTES:
r1767	Y+LAT2 Utilized transport	na1[e] + phe_L[e] + trp_L[c] -> na1[c] + trp_L[e] + phe_L[c]	-9057.1	9057.1		Transport, extracellular	0	0	1000	0	1		NOTES:
r1768	Y+LAT2 Utilized transport	na1[e] + phe_L[e] + tyr_L[c] -> na1[c] + tyr_L[e] + phe_L[c]	-9057.1	9057.1		Transport, extracellular	0	0	1000	0	1		NOTES:
r1769	Y+LAT2 Utilized transport	na1[e] + cys_L[c] + phe_L[e] -> na1[c] + cys_L[e] + phe_L[c]	-9057.1	9057.1		Transport, extracellular	0	0	1000	0	1		NOTES:
r1770	Y+LAT2 Utilized transport	na1[e] + phe_L[e] + leu_L[c] -> na1[c] + leu_L[e] + phe_L[c]	-9057.1	9057.1		Transport, extracellular	0	0	1000	0	1		NOTES:
r1771	Y+LAT2 Utilized transport	na1[e] + phe_L[e] + pro_L[c] -> na1[c] + pro_L[e] + phe_L[c]	-9057.1	9057.1		Transport, extracellular	0	0	1000	0	1		NOTES:
r1772	Y+LAT2 Utilized transport	na1[e] + asn_L[c] + phe_L[e] -> na1[c] + asn_L[e] + phe_L[c]	-9057.1	9057.1		Transport, extracellular	0	0	1000	0	1		NOTES:
r1773	Y+LAT2 Utilized transport	na1[e] + phe_L[e] + val_L[c] -> na1[c] + val_L[e] + phe_L[c]	-9057.1	9057.1		Transport, extracellular	0	0	1000	0	1		NOTES:
r1774	Y+LAT2 Utilized transport	na1[e] + thr_L[c] + phe_L[e] -> na1[c] + thr_L[e] + phe_L[c]	-9057.1	9057.1		Transport, extracellular	0	0	1000	0	1		NOTES:
r1775	Y+LAT2 Utilized transport	na1[e] + phe_L[e] + hom_L[c] -> na1[c] + hom_L[e] + phe_L[c]	-9057.1	9057.1		Transport, extracellular	0	0	1000	0	1		NOTES:
r1776	Y+LAT2 Utilized transport	na1[e] + phe_L[e] + ile_L[c] -> na1[c] + ile_L[e] + phe_L[c]	-9057.1	9057.1		Transport, extracellular	0	0	1000	0	1		NOTES:
r1777	Y+LAT2 Utilized transport	na1[e] + gly[c] + tyr_L[e] -> na1[c] + gly[e] + tyr_L[c]	-9057.1	9057.1		Transport, extracellular	0	0	1000	0	1		NOTES:
r1778	Y+LAT2 Utilized transport	na1[e] + ala_L[c] + tyr_L[e] -> na1[c] + ala_L[e] + tyr_L[c]	-9057.1	9057.1		Transport, extracellular	0	0	1000	0	1		NOTES:
r1779	Y+LAT2 Utilized transport	na1[e] + gln_L[c] + tyr_L[e] -> na1[c] + gln_L[e] + tyr_L[c]	-9057.1	9057.1		Transport, extracellular	0	0	1000	0	1		NOTES:
r1780	Y+LAT2 Utilized transport	na1[e] + ser_L[c] + tyr_L[e] -> na1[c] + ser_L[e] + tyr_L[c]	-9057.1	9057.1		Transport, extracellular	0	0	1000	0	1		NOTES:
r1781	Y+LAT2 Utilized transport	na1[e] + met_L[c] + tyr_L[e] -> na1[c] + met_L[e] + tyr_L[c]	-9057.1	9057.1		Transport, extracellular	0	0	1000	0	1		NOTES:
r1782	Y+LAT2 Utilized transport	na1[e] + tyr_L[e] + trp_L[c] -> na1[c] + trp_L[e] + tyr_L[c]	-9057.1	9057.1		Transport, extracellular	0	0	1000	0	1		NOTES:
r1783	Y+LAT2 Utilized transport	na1[e] + tyr_L[e] + phe_L[c] -> na1[c] + phe_L[e] + tyr_L[c]	-9057.1	9057.1		Transport, extracellular	0	0	1000	0	1		NOTES:
r1784	Y+LAT2 Utilized transport	na1[e] + cys_L[c] + tyr_L[e] -> na1[c] + cys_L[e] + tyr_L[c]	-9057.1	9057.1		Transport, extracellular	0	0	1000	0	1		NOTES:
r1785	Y+LAT2 Utilized transport	na1[e] + tyr_L[e] + leu_L[c] -> na1[c] + leu_L[e] + tyr_L[c]	-9057.1	9057.1		Transport, extracellular	0	0	1000	0	1		NOTES:
r1786	Y+LAT2 Utilized transport	na1[e] + tyr_L[e] + pro_L[c] -> na1[c] + pro_L[e] + tyr_L[c]	-9057.1	9057.1		Transport, extracellular	0	0	1000	0	1		NOTES:
r1787	Y+LAT2 Utilized transport	na1[e] + asn_L[c] + tyr_L[e] -> na1[c] + asn_L[e] + tyr_L[c]	-9057.1	9057.1		Transport, extracellular	0	0	1000	0	1		NOTES:
r1788	Y+LAT2 Utilized transport	na1[e] + tyr_L[e] + val_L[c] -> na1[c] + val_L[e] + tyr_L[c]	-9057.1	9057.1		Transport, extracellular	0	0	1000	0	1		NOTES:
r1789	Y+LAT2 Utilized transport	na1[e] + thr_L[c] + tyr_L[e] -> na1[c] + thr_L[e] + tyr_L[c]	-9057.1	9057.1		Transport, extracellular	0	0	1000	0	1		NOTES:
r1790	Y+LAT2 Utilized transport	na1[e] + tyr_L[e] + hom_L[c] -> na1[c] + hom_L[e] + tyr_L[c]	-9057.1	9057.1		Transport, extracellular	0	0	1000	0	1		NOTES:
r1791	Y+LAT2 Utilized transport	na1[e] + tyr_L[e] + ile_L[c] -> na1[c] + ile_L[e] + tyr_L[c]	-9057.1	9057.1		Transport, extracellular	0	0	1000	0	1		NOTES:
r1792	Y+LAT2 Utilized transport	na1[e] + cys_L[e] + gly[c] -> na1[c] + cys_L[c] + gly[e]	-9057.1	9057.1		Transport, extracellular	0	0	1000	0	1		NOTES:
r1796	Y+LAT2 Utilized transport	na1[e] + cys_L[e] + met_L[c] -> na1[c] + cys_L[c] + met_L[e]	-9057.1	9057.1		Transport, extracellular	0	0	1000	0	1		NOTES:
r1797	Y+LAT2 Utilized transport	na1[e] + cys_L[e] + trp_L[c] -> na1[c] + cys_L[c] + trp_L[e]	-9057.1	9057.1		Transport, extracellular	0	0	1000	0	1		NOTES:
r1798	Y+LAT2 Utilized transport	na1[e] + cys_L[e] + phe_L[c] -> na1[c] + cys_L[c] + phe_L[e]	-9057.1	9057.1		Transport, extracellular	0	0	1000	0	1		NOTES:
r1799	Y+LAT2 Utilized transport	na1[e] + cys_L[e] + tyr_L[c] -> na1[c] + cys_L[c] + tyr_L[e]	-9057.1	9057.1		Transport, extracellular	0	0	1000	0	1		NOTES:
r1800	Y+LAT2 Utilized transport	na1[e] + cys_L[e] + leu_L[c] -> na1[c] + cys_L[c] + leu_L[e]	-9057.1	9057.1		Transport, extracellular	0	0	1000	0	1		NOTES:
r1801	Y+LAT2 Utilized transport	na1[e] + cys_L[e] + pro_L[c] -> na1[c] + cys_L[c] + pro_L[e]	-9057.1	9057.1		Transport, extracellular	0	0	1000	0	1		NOTES:
r1803	Y+LAT2 Utilized transport	na1[e] + cys_L[e] + val_L[c] -> na1[c] + cys_L[c] + val_L[e]	-9057.1	9057.1		Transport, extracellular	0	0	1000	0	1		NOTES:
r1806	Y+LAT2 Utilized transport	na1[e] + cys_L[e] + ile_L[c] -> na1[c] + cys_L[c] + ile_L[e]	-9057.1	9057.1		Transport, extracellular	0	0	1000	0	1		NOTES:
r1807	Y+LAT2 Utilized transport	na1[e] + gly[c] + leu_L[e] -> na1[c] + gly[e] + leu_L[c]	-9057.1	9057.1		Transport, extracellular	0	0	1000	0	1		NOTES:
r1808	Y+LAT2 Utilized transport	na1[e] + ala_L[c] + leu_L[e] -> na1[c] + ala_L[e] + leu_L[c]	-9057.1	9057.1		Transport, extracellular	0	0	1000	0	1		NOTES:
r1809	Y+LAT2 Utilized transport	na1[e] + gln_L[c] + leu_L[e] -> na1[c] + gln_L[e] + leu_L[c]	-9057.1	9057.1		Transport, extracellular	0	0	1000	0	1		NOTES:
r1810	Y+LAT2 Utilized transport	na1[e] + ser_L[c] + leu_L[e] -> na1[c] + ser_L[e] + leu_L[c]	-9057.1	9057.1		Transport, extracellular	0	0	1000	0	1		NOTES:
r1811	Y+LAT2 Utilized transport	na1[e] + met_L[c] + leu_L[e] -> na1[c] + met_L[e] + leu_L[c]	-9057.1	9057.1		Transport, extracellular	0	0	1000	0	1		NOTES:
r1812	Y+LAT2 Utilized transport	na1[e] + leu_L[e] + trp_L[c] -> na1[c] + trp_L[e] + leu_L[c]	-9057.1	9057.1		Transport, extracellular	0	0	1000	0	1		NOTES:
r1813	Y+LAT2 Utilized transport	na1[e] + leu_L[e] + phe_L[c] -> na1[c] + phe_L[e] + leu_L[c]	-9057.1	9057.1		Transport, extracellular	0	0	1000	0	1		NOTES:
r1814	Y+LAT2 Utilized transport	na1[e] + leu_L[e] + tyr_L[c] -> na1[c] + tyr_L[e] + leu_L[c]	-9057.1	9057.1		Transport, extracellular	0	0	1000	0	1		NOTES:
r1815	Y+LAT2 Utilized transport	na1[e] + cys_L[c] + leu_L[e] -> na1[c] + cys_L[e] + leu_L[c]	-9057.1	9057.1		Transport, extracellular	0	0	1000	0	1		NOTES:
r1816	Y+LAT2 Utilized transport	na1[e] + leu_L[e] + pro_L[c] -> na1[c] + pro_L[e] + leu_L[c]	-9057.1	9057.1		Transport, extracellular	0	0	1000	0	1		NOTES:
r1817	Y+LAT2 Utilized transport	na1[e] + asn_L[c] + leu_L[e] -> na1[c] + asn_L[e] + leu_L[c]	-9057.1	9057.1		Transport, extracellular	0	0	1000	0	1		NOTES:
r1818	Y+LAT2 Utilized transport	na1[e] + leu_L[e] + val_L[c] -> na1[c] + val_L[e] + leu_L[c]	-9057.1	9057.1		Transport, extracellular	0	0	1000	0	1		NOTES:
r1819	Y+LAT2 Utilized transport	na1[e] + thr_L[c] + leu_L[e] -> na1[c] + thr_L[e] + leu_L[c]	-9057.1	9057.1		Transport, extracellular	0	0	1000	0	1		NOTES:
r1821	Y+LAT2 Utilized transport	na1[e] + leu_L[e] + ile_L[c] -> na1[c] + ile_L[e] + leu_L[c]	-9057.1	9057.1		Transport, extracellular	0	0	1000	0	1		NOTES:
r1822	Y+LAT2 Utilized transport	na1[e] + gly[c] + pro_L[e] -> na1[c] + gly[e] + pro_L[c]	-9057.1	9057.1		Transport, extracellular	0	0	1000	0	1		NOTES:
r1823	Y+LAT2 Utilized transport	na1[e] + ala_L[c] + pro_L[e] -> na1[c] + ala_L[e] + pro_L[c]	-9057.1	9057.1		Transport, extracellular	0	0	1000	0	1		NOTES:
r1824	Y+LAT2 Utilized transport	na1[e] + gln_L[c] + pro_L[e] -> na1[c] + gln_L[e] + pro_L[c]	-9057.1	9057.1		Transport, extracellular	0	0	1000	0	1		NOTES:
r1825	Y+LAT2 Utilized transport	na1[e] + ser_L[c] + pro_L[e] -> na1[c] + ser_L[e] + pro_L[c]	-9057.1	9057.1		Transport, extracellular	0	0	1000	0	1		NOTES:
r1826	Y+LAT2 Utilized transport	na1[e] + met_L[c] + pro_L[e] -> na1[c] + met_L[e] + pro_L[c]	-9057.1	9057.1		Transport, extracellular	0	0	1000	0	1		NOTES:
r1827	Y+LAT2 Utilized transport	na1[e] + pro_L[e] + trp_L[c] -> na1[c] + trp_L[e] + pro_L[c]	-9057.1	9057.1		Transport, extracellular	0	0	1000	0	1		NOTES:
r1828	Y+LAT2 Utilized transport	na1[e] + pro_L[e] + phe_L[c] -> na1[c] + phe_L[e] + pro_L[c]	-9057.1	9057.1		Transport, extracellular	0	0	1000	0	1		NOTES:
r1829	Y+LAT2 Utilized transport	na1[e] + pro_L[e] + tyr_L[c] -> na1[c] + tyr_L[e] + pro_L[c]	-9057.1	9057.1		Transport, extracellular	0	0	1000	0	1		NOTES:
r1830	Y+LAT2 Utilized transport	na1[e] + cys_L[c] + pro_L[e] -> na1[c] + cys_L[e] + pro_L[c]	-9057.1	9057.1		Transport, extracellular	0	0	1000	0	1	4.1.3.6	NOTES:
r1831	Y+LAT2 Utilized transport	na1[e] + pro_L[e] + leu_L[c] -> na1[c] + leu_L[e] + pro_L[c]	-9057.1	9057.1		Transport, extracellular	0	0	1000	0	1		NOTES:
r1832	Y+LAT2 Utilized transport	na1[e] + asn_L[c] + pro_L[e] -> na1[c] + asn_L[e] + pro_L[c]	-9057.1	9057.1		Transport, extracellular	0	0	1000	0	1		NOTES:
r1833	Y+LAT2 Utilized transport	na1[e] + pro_L[e] + val_L[c] -> na1[c] + val_L[e] + pro_L[c]	-9057.1	9057.1		Transport, extracellular	0	0	1000	0	1		NOTES:
r1834	Y+LAT2 Utilized transport	na1[e] + thr_L[c] + pro_L[e] -> na1[c] + thr_L[e] + pro_L[c]	-9057.1	9057.1		Transport, extracellular	0	0	1000	0	1		NOTES:
r1835	Y+LAT2 Utilized transport	na1[e] + pro_L[e] + hom_L[c] -> na1[c] + hom_L[e] + pro_L[c]	-9057.1	9057.1		Transport, extracellular	0	0	1000	0	1		NOTES:
r1836	Y+LAT2 Utilized transport	na1[e] + pro_L[e] + ile_L[c] -> na1[c] + ile_L[e] + pro_L[c]	-9057.1	9057.1		Transport, extracellular	0	0	1000	0	1	1.2.7.2	NOTES:
r1837	Y+LAT2 Utilized transport	na1[e] + asn_L[e] + gly[c] -> na1[c] + asn_L[c] + gly[e]	-9057.1	9057.1		Transport, extracellular	0	0	1000	0	1		NOTES:
r1841	Y+LAT2 Utilized transport	na1[e] + asn_L[e] + met_L[c] -> na1[c] + asn_L[c] + met_L[e]	-9057.1	9057.1		Transport, extracellular	0	0	1000	0	1	2.7.1.48	NOTES:
r1842	Y+LAT2 Utilized transport	na1[e] + asn_L[e] + trp_L[c] -> na1[c] + asn_L[c] + trp_L[e]	-9057.1	9057.1		Transport, extracellular	0	0	1000	0	1		NOTES:
r1843	Y+LAT2 Utilized transport	na1[e] + asn_L[e] + phe_L[c] -> na1[c] + asn_L[c] + phe_L[e]	-9057.1	9057.1		Transport, extracellular	0	0	1000	0	1		NOTES:
r1844	Y+LAT2 Utilized transport	na1[e] + asn_L[e] + tyr_L[c] -> na1[c] + asn_L[c] + tyr_L[e]	-9057.1	9057.1		Transport, extracellular	0	0	1000	0	1	2.3.1.26	NOTES:
r1846	Y+LAT2 Utilized transport	na1[e] + asn_L[e] + leu_L[c] -> na1[c] + asn_L[c] + leu_L[e]	-9057.1	9057.1		Transport, extracellular	0	0	1000	0	1	2.3.1.26	NOTES:
r1847	Y+LAT2 Utilized transport	na1[e] + asn_L[e] + pro_L[c] -> na1[c] + asn_L[c] + pro_L[e]	-9057.1	9057.1		Transport, extracellular	0	0	1000	0	1	2.3.1.26	NOTES:
r1848	Y+LAT2 Utilized transport	na1[e] + asn_L[e] + val_L[c] -> na1[c] + asn_L[c] + val_L[e]	-9057.1	9057.1		Transport, extracellular	0	0	1000	0	1	3.1.1.13	NOTES:
r1850	Y+LAT2 Utilized transport	na1[e] + asn_L[e] + hom_L[c] -> na1[c] + asn_L[c] + hom_L[e]	-9057.1	9057.1		Transport, extracellular	0	0	1000	0	1	3.1.1.13	NOTES:
r1851	Y+LAT2 Utilized transport	na1[e] + asn_L[e] + ile_L[c] -> na1[c] + asn_L[c] + ile_L[e]	-9057.1	9057.1		Transport, extracellular	0	0	1000	0	1	3.1.1.13	NOTES:
r1852	Y+LAT2 Utilized transport	na1[e] + gly[c] + val_L[e] -> na1[c] + gly[e] + val_L[c]	-9057.1	9057.1		Transport, extracellular	0	0	1000	0	1	6.2.1.3	NOTES:
r1853	Y+LAT2 Utilized transport	na1[e] + ala_L[c] + val_L[e] -> na1[c] + ala_L[e] + val_L[c]	-9057.1	9057.1		Transport, extracellular	0	0	1000	0	1	6.2.1.3	NOTES:
r1854	Y+LAT2 Utilized transport	na1[e] + gln_L[c] + val_L[e] -> na1[c] + gln_L[e] + val_L[c]	-9057.1	9057.1		Transport, extracellular	0	0	1000	0	1	6.2.1.3	NOTES:
r1855	Y+LAT2 Utilized transport	na1[e] + ser_L[c] + val_L[e] -> na1[c] + ser_L[e] + val_L[c]	-9057.1	9057.1		Transport, extracellular	0	0	1000	0	1	6.2.1.3	NOTES:
r1856	Y+LAT2 Utilized transport	na1[e] + met_L[c] + val_L[e] -> na1[c] + met_L[e] + val_L[c]	-9057.1	9057.1		Transport, extracellular	0	0	1000	0	1	6.2.1.3	NOTES:
r1857	Y+LAT2 Utilized transport	na1[e] + val_L[e] + trp_L[c] -> na1[c] + trp_L[e] + val_L[c]	-9057.1	9057.1		Transport, extracellular	0	0	1000	0	1	6.2.1.3	NOTES:
r1858	Y+LAT2 Utilized transport	na1[e] + val_L[e] + phe_L[c] -> na1[c] + phe_L[e] + val_L[c]	-9057.1	9057.1		Transport, extracellular	0	0	1000	0	1	6.2.1.3	NOTES:
r1859	Y+LAT2 Utilized transport	na1[e] + val_L[e] + tyr_L[c] -> na1[c] + tyr_L[e] + val_L[c]	-9057.1	9057.1		Transport, extracellular	0	0	1000	0	1		NOTES:
r1860	Y+LAT2 Utilized transport	na1[e] + cys_L[c] + val_L[e] -> na1[c] + cys_L[e] + val_L[c]	-9057.1	9057.1		Transport, extracellular	0	0	1000	0	1		NOTES:
r1861	Y+LAT2 Utilized transport	na1[e] + val_L[e] + leu_L[c] -> na1[c] + leu_L[e] + val_L[c]	-9057.1	9057.1		Transport, extracellular	0	0	1000	0	1		NOTES:
r1862	Y+LAT2 Utilized transport	na1[e] + val_L[e] + pro_L[c] -> na1[c] + pro_L[e] + val_L[c]	-9057.1	9057.1		Transport, extracellular	0	0	1000	0	1		NOTES:
r1863	Y+LAT2 Utilized transport	na1[e] + asn_L[c] + val_L[e] -> na1[c] + asn_L[e] + val_L[c]	-9057.1	9057.1		Transport, extracellular	0	0	1000	0	1		NOTES:
r1864	Y+LAT2 Utilized transport	na1[e] + thr_L[c] + val_L[e] -> na1[c] + thr_L[e] + val_L[c]	-9057.1	9057.1		Transport, extracellular	0	0	1000	0	1		NOTES:
r1865	Y+LAT2 Utilized transport	na1[e] + val_L[e] + hom_L[c] -> na1[c] + hom_L[e] + val_L[c]	-9057.1	9057.1		Transport, extracellular	0	0	1000	0	1		NOTES:
r1866	Y+LAT2 Utilized transport	na1[e] + val_L[e] + ile_L[c] -> na1[c] + ile_L[e] + val_L[c]	-9057.1	9057.1		Transport, extracellular	0	0	1000	0	1		NOTES:
r1867	Y+LAT2 Utilized transport	na1[e] + gly[c] + thr_L[e] -> na1[c] + gly[e] + thr_L[c]	-9057.1	9057.1		Transport, extracellular	0	0	1000	0	1		NOTES:
r1871	Y+LAT2 Utilized transport	na1[e] + thr_L[e] + met_L[c] -> na1[c] + thr_L[c] + met_L[e]	-9057.1	9057.1		Transport, extracellular	0	0	1000	0	1		NOTES:
r1872	Y+LAT2 Utilized transport	na1[e] + thr_L[e] + trp_L[c] -> na1[c] + thr_L[c] + trp_L[e]	-9057.1	9057.1		Transport, extracellular	0	0	1000	0	1		NOTES:
r1873	Y+LAT2 Utilized transport	na1[e] + thr_L[e] + phe_L[c] -> na1[c] + thr_L[c] + phe_L[e]	-9057.1	9057.1		Transport, extracellular	0	0	1000	0	1		NOTES:
r1874	Y+LAT2 Utilized transport	na1[e] + thr_L[e] + tyr_L[c] -> na1[c] + thr_L[c] + tyr_L[e]	-9057.1	9057.1		Transport, extracellular	0	0	1000	0	1		NOTES:
r1876	Y+LAT2 Utilized transport	na1[e] + thr_L[e] + leu_L[c] -> na1[c] + thr_L[c] + leu_L[e]	-9057.1	9057.1		Transport, extracellular	0	0	1000	0	1	4.4.1.22	NOTES:
r1877	Y+LAT2 Utilized transport	na1[e] + thr_L[e] + pro_L[c] -> na1[c] + thr_L[c] + pro_L[e]	-9057.1	9057.1		Transport, extracellular	0	0	1000	0	1	1.1.1.284	NOTES:
r1879	Y+LAT2 Utilized transport	na1[e] + thr_L[e] + val_L[c] -> na1[c] + thr_L[c] + val_L[e]	-9057.1	9057.1		Transport, extracellular	0	0	1000	0	1	1.3.1.72	NOTES:
r1880	Y+LAT2 Utilized transport	na1[e] + thr_L[e] + hom_L[c] -> na1[c] + thr_L[c] + hom_L[e]	-9057.1	9057.1		Transport, extracellular	0	0	1000	0	1	5.3.3.5	NOTES:
r1881	Y+LAT2 Utilized transport	na1[e] + thr_L[e] + ile_L[c] -> na1[c] + thr_L[c] + ile_L[e]	-9057.1	9057.1		Transport, extracellular	0	0	1000	0	1	3.5.4.15	NOTES:
r1882	Y+LAT2 Utilized transport	na1[e] + gly[c] + hom_L[e] -> na1[c] + gly[e] + hom_L[c]	-9057.1	9057.1		Transport, extracellular	0	0	1000	0	1	2.3.1.21	NOTES:
r1883	Y+LAT2 Utilized transport	na1[e] + ala_L[c] + hom_L[e] -> na1[c] + ala_L[e] + hom_L[c]	-9057.1	9057.1		Transport, extracellular	0	0	1000	0	1	2.3.1.7	NOTES:
r1884	Y+LAT2 Utilized transport	na1[e] + gln_L[c] + hom_L[e] -> na1[c] + gln_L[e] + hom_L[c]	-9057.1	9057.1		Transport, extracellular	0	0	1000	0	1		NOTES:
r1885	Y+LAT2 Utilized transport	na1[e] + ser_L[c] + hom_L[e] -> na1[c] + ser_L[e] + hom_L[c]	-9057.1	9057.1		Transport, extracellular	0	0	1000	0	1		NOTES:
r1886	Y+LAT2 Utilized transport	na1[e] + met_L[c] + hom_L[e] -> na1[c] + met_L[e] + hom_L[c]	-9057.1	9057.1		Transport, extracellular	0	0	1000	0	1	4.2.1.1	NOTES:
r1887	Y+LAT2 Utilized transport	na1[e] + hom_L[e] + trp_L[c] -> na1[c] + trp_L[e] + hom_L[c]	-9057.1	9057.1		Transport, extracellular	0	0	1000	0	1	4.2.1.1	NOTES:
r1888	Y+LAT2 Utilized transport	na1[e] + hom_L[e] + phe_L[c] -> na1[c] + phe_L[e] + hom_L[c]	-9057.1	9057.1		Transport, extracellular	0	0	1000	0	1	4.2.1.1	NOTES:
r1889	Y+LAT2 Utilized transport	na1[e] + hom_L[e] + tyr_L[c] -> na1[c] + tyr_L[e] + hom_L[c]	-9057.1	9057.1		Transport, extracellular	0	0	1000	0	1	4.2.1.1	NOTES:
r1890	Y+LAT2 Utilized transport	na1[e] + cys_L[c] + hom_L[e] -> na1[c] + cys_L[e] + hom_L[c]	-9057.1	9057.1		Transport, extracellular	0	0	1000	0	1		NOTES:
r1891	Y+LAT2 Utilized transport	na1[e] + hom_L[e] + leu_L[c] -> na1[c] + leu_L[e] + hom_L[c]	-9057.1	9057.1		Transport, extracellular	0	0	1000	0	1		NOTES:
r1892	Y+LAT2 Utilized transport	na1[e] + hom_L[e] + pro_L[c] -> na1[c] + pro_L[e] + hom_L[c]	-9057.1	9057.1		Transport, extracellular	0	0	1000	0	1	1.17.4.1	NOTES:
r1893	Y+LAT2 Utilized transport	na1[e] + asn_L[c] + hom_L[e] -> na1[c] + asn_L[e] + hom_L[c]	-9057.1	9057.1		Transport, extracellular	0	0	1000	0	1	1.8.1.9	NOTES:
r1894	Y+LAT2 Utilized transport	na1[e] + hom_L[e] + val_L[c] -> na1[c] + val_L[e] + hom_L[c]	-9057.1	9057.1		Transport, extracellular	0	0	1000	0	1		NOTES:
r1895	Y+LAT2 Utilized transport	na1[e] + thr_L[c] + hom_L[e] -> na1[c] + thr_L[e] + hom_L[c]	-9057.1	9057.1		Transport, extracellular	0	0	1000	0	1		NOTES:
r1896	Y+LAT2 Utilized transport	na1[e] + hom_L[e] + ile_L[c] -> na1[c] + ile_L[e] + hom_L[c]	-9057.1	9057.1		Transport, extracellular	0	0	1000	0	1		NOTES:
r1897	Y+LAT2 Utilized transport	na1[e] + gly[c] + ile_L[e] -> na1[c] + gly[e] + ile_L[c]	-9057.1	9057.1		Transport, extracellular	0	0	1000	0	1	1.3.3.6	NOTES:
r1898	Y+LAT2 Utilized transport	na1[e] + ala_L[c] + ile_L[e] -> na1[c] + ala_L[e] + ile_L[c]	-9057.1	9057.1		Transport, extracellular	0	0	1000	0	1	1.3.3.6	NOTES:
r1899	Y+LAT2 Utilized transport	na1[e] + gln_L[c] + ile_L[e] -> na1[c] + gln_L[e] + ile_L[c]	-9057.1	9057.1		Transport, extracellular	0	0	1000	0	1	1.3.3.6	NOTES:
r1900	Y+LAT2 Utilized transport	na1[e] + ser_L[c] + ile_L[e] -> na1[c] + ser_L[e] + ile_L[c]	-9057.1	9057.1		Transport, extracellular	0	0	1000	0	1	1.3.3.6	NOTES:
r1901	Y+LAT2 Utilized transport	na1[e] + met_L[c] + ile_L[e] -> na1[c] + met_L[e] + ile_L[c]	-9057.1	9057.1		Transport, extracellular	0	0	1000	0	1	1.3.3.6	NOTES:
r1902	Y+LAT2 Utilized transport	na1[e] + ile_L[e] + trp_L[c] -> na1[c] + trp_L[e] + ile_L[c]	-9057.1	9057.1		Transport, extracellular	0	0	1000	0	1		NOTES:
r1903	Y+LAT2 Utilized transport	na1[e] + ile_L[e] + phe_L[c] -> na1[c] + phe_L[e] + ile_L[c]	-9057.1	9057.1		Transport, extracellular	0	0	1000	0	1		NOTES:
r1904	Y+LAT2 Utilized transport	na1[e] + ile_L[e] + tyr_L[c] -> na1[c] + tyr_L[e] + ile_L[c]	-9057.1	9057.1		Transport, extracellular	0	0	1000	0	1		NOTES:
r1905	Y+LAT2 Utilized transport	na1[e] + cys_L[c] + ile_L[e] -> na1[c] + cys_L[e] + ile_L[c]	-9057.1	9057.1		Transport, extracellular	0	0	1000	0	1		NOTES:
r1906	Y+LAT2 Utilized transport	na1[e] + ile_L[e] + leu_L[c] -> na1[c] + leu_L[e] + ile_L[c]	-9057.1	9057.1		Transport, extracellular	0	0	1000	0	1	1.3.1.27	NOTES:
r1907	Y+LAT2 Utilized transport	na1[e] + ile_L[e] + pro_L[c] -> na1[c] + pro_L[e] + ile_L[c]	-9057.1	9057.1		Transport, extracellular	0	0	1000	0	1	1.3.1.27	NOTES:
r1908	Y+LAT2 Utilized transport	na1[e] + asn_L[c] + ile_L[e] -> na1[c] + asn_L[e] + ile_L[c]	-9057.1	9057.1		Transport, extracellular	0	0	1000	0	1	2.3.1.86	NOTES:
r1909	Y+LAT2 Utilized transport	na1[e] + ile_L[e] + val_L[c] -> na1[c] + val_L[e] + ile_L[c]	-9057.1	9057.1		Transport, extracellular	0	0	1000	0	1	6.2.1.3	NOTES:
r1910	Y+LAT2 Utilized transport	na1[e] + thr_L[c] + ile_L[e] -> na1[c] + thr_L[e] + ile_L[c]	-9057.1	9057.1		Transport, extracellular	0	0	1000	0	1	6.2.1.3	NOTES:
r1911	Y+LAT2 Utilized transport	na1[e] + ile_L[e] + hom_L[c] -> na1[c] + hom_L[e] + ile_L[c]	-9057.1	9057.1		Transport, extracellular	0	0	1000	0	1		NOTES:
r1912	Y+LAT2 Utilized transport	na1[e] + gly[e] + lys_L[c] -> na1[c] + gly[c] + lys_L[e]	-9057.1	9057.1		Transport, extracellular	0	0	1000	0	1		NOTES:
r1913	Y+LAT2 Utilized transport	na1[e] + gly[e] + arg_L[c] -> na1[c] + gly[c] + arg_L[e]	-9057.1	9057.1		Transport, extracellular	0	0	1000	0	1		NOTES:
r1914	Y+LAT2 Utilized transport	na1[e] + orn[c] + gly[e] -> na1[c] + gly[c] + orn[e]	-9057.1	9057.1		Transport, extracellular	0	0	1000	0	1		NOTES:
r1915	Y+LAT2 Utilized transport	na1[e] + gly[e] + his_L[c] -> na1[c] + gly[c] + his_L[e]	-9057.1	9057.1		Transport, extracellular	0	0	1000	0	1		NOTES:
r1916	Y+LAT2 Utilized transport	na1[e] + gly[e] + citr_L[c] -> na1[c] + gly[c] + citr_L[e]	-9057.1	9057.1		Transport, extracellular	0	0	1000	0	1		NOTES:
r1917	Y+LAT2 Utilized transport	na1[e] + ala_L[e] + lys_L[c] -> na1[c] + ala_L[c] + lys_L[e]	-9057.1	9057.1		Transport, extracellular	0	0	1000	0	1		NOTES:
r1918	Y+LAT2 Utilized transport	na1[e] + ala_L[e] + arg_L[c] -> na1[c] + ala_L[c] + arg_L[e]	-9057.1	9057.1		Transport, extracellular	0	0	1000	0	1		NOTES:
r1919	Y+LAT2 Utilized transport	na1[e] + orn[c] + ala_L[e] -> na1[c] + ala_L[c] + orn[e]	-9057.1	9057.1		Transport, extracellular	0	0	1000	0	1		NOTES:
r1920	Y+LAT2 Utilized transport	na1[e] + ala_L[e] + his_L[c] -> na1[c] + ala_L[c] + his_L[e]	-9057.1	9057.1		Transport, extracellular	0	0	1000	0	1		NOTES:
r1921	Y+LAT2 Utilized transport	na1[e] + ala_L[e] + citr_L[c] -> na1[c] + ala_L[c] + citr_L[e]	-9057.1	9057.1		Transport, extracellular	0	0	1000	0	1		NOTES:
r1922	Y+LAT2 Utilized transport	na1[e] + gln_L[e] + lys_L[c] -> na1[c] + gln_L[c] + lys_L[e]	-9057.1	9057.1		Transport, extracellular	0	0	1000	0	1		NOTES:
r1923	Y+LAT2 Utilized transport	na1[e] + gln_L[e] + arg_L[c] -> na1[c] + gln_L[c] + arg_L[e]	-9057.1	9057.1		Transport, extracellular	0	0	1000	0	1		NOTES:
r1924	Y+LAT2 Utilized transport	na1[e] + orn[c] + gln_L[e] -> na1[c] + gln_L[c] + orn[e]	-9057.1	9057.1		Transport, extracellular	0	0	1000	0	1		NOTES:
r1925	Y+LAT2 Utilized transport	na1[e] + gln_L[e] + his_L[c] -> na1[c] + gln_L[c] + his_L[e]	-9057.1	9057.1		Transport, extracellular	0	0	1000	0	1		NOTES:
r1926	Y+LAT2 Utilized transport	na1[e] + gln_L[e] + citr_L[c] -> na1[c] + gln_L[c] + citr_L[e]	-9057.1	9057.1		Transport, extracellular	0	0	1000	0	1		NOTES:
r1928	Y+LAT2 Utilized transport	na1[e] + ser_L[e] + arg_L[c] -> na1[c] + ser_L[c] + arg_L[e]	-9057.1	9057.1		Transport, extracellular	0	0	1000	0	1		NOTES:
r1929	Y+LAT2 Utilized transport	na1[e] + orn[c] + ser_L[e] -> na1[c] + ser_L[c] + orn[e]	-9057.1	9057.1		Transport, extracellular	0	0	1000	0	1		NOTES:
r1930	Y+LAT2 Utilized transport	na1[e] + ser_L[e] + his_L[c] -> na1[c] + ser_L[c] + his_L[e]	-9057.1	9057.1		Transport, extracellular	0	0	1000	0	1		NOTES:
r1931	Y+LAT2 Utilized transport	na1[e] + ser_L[e] + citr_L[c] -> na1[c] + ser_L[c] + citr_L[e]	-9057.1	9057.1		Transport, extracellular	0	0	1000	0	1		NOTES:
r1932	Y+LAT2 Utilized transport	na1[e] + lys_L[c] + met_L[e] -> na1[c] + lys_L[e] + met_L[c]	-9057.1	9057.1		Transport, extracellular	0	0	1000	0	1		NOTES:
r1933	Y+LAT2 Utilized transport	na1[e] + arg_L[c] + met_L[e] -> na1[c] + arg_L[e] + met_L[c]	-9057.1	9057.1		Transport, extracellular	0	0	1000	0	1		NOTES:
r1934	Y+LAT2 Utilized transport	na1[e] + orn[c] + met_L[e] -> na1[c] + met_L[c] + orn[e]	-9057.1	9057.1		Transport, extracellular	0	0	1000	0	1		NOTES:
r1935	Y+LAT2 Utilized transport	na1[e] + met_L[e] + his_L[c] -> na1[c] + met_L[c] + his_L[e]	-9057.1	9057.1		Transport, extracellular	0	0	1000	0	1		NOTES:
r1936	Y+LAT2 Utilized transport	na1[e] + citr_L[c] + met_L[e] -> na1[c] + met_L[c] + citr_L[e]	-9057.1	9057.1		Transport, extracellular	0	0	1000	0	1		NOTES:
r1937	Y+LAT2 Utilized transport	na1[e] + lys_L[c] + trp_L[e] -> na1[c] + lys_L[e] + trp_L[c]	-9057.1	9057.1		Transport, extracellular	0	0	1000	0	1		NOTES:
r1938	Y+LAT2 Utilized transport	na1[e] + arg_L[c] + trp_L[e] -> na1[c] + arg_L[e] + trp_L[c]	-9057.1	9057.1		Transport, extracellular	0	0	1000	0	1		NOTES:
r1939	Y+LAT2 Utilized transport	na1[e] + orn[c] + trp_L[e] -> na1[c] + orn[e] + trp_L[c]	-9057.1	9057.1		Transport, extracellular	0	0	1000	0	1		NOTES:
r1940	Y+LAT2 Utilized transport	na1[e] + trp_L[e] + his_L[c] -> na1[c] + his_L[e] + trp_L[c]	-9057.1	9057.1		Transport, extracellular	0	0	1000	0	1		NOTES:
r1941	Y+LAT2 Utilized transport	na1[e] + citr_L[c] + trp_L[e] -> na1[c] + trp_L[c] + citr_L[e]	-9057.1	9057.1		Transport, extracellular	0	0	1000	0	1		NOTES:
r1942	Y+LAT2 Utilized transport	na1[e] + lys_L[c] + phe_L[e] -> na1[c] + lys_L[e] + phe_L[c]	-9057.1	9057.1		Transport, extracellular	0	0	1000	0	1		NOTES:
r1943	Y+LAT2 Utilized transport	na1[e] + arg_L[c] + phe_L[e] -> na1[c] + arg_L[e] + phe_L[c]	-9057.1	9057.1		Transport, extracellular	0	0	1000	0	1		NOTES:
r1944	Y+LAT2 Utilized transport	na1[e] + orn[c] + phe_L[e] -> na1[c] + orn[e] + phe_L[c]	-9057.1	9057.1		Transport, extracellular	0	0	1000	0	1		NOTES:
r1945	Y+LAT2 Utilized transport	na1[e] + phe_L[e] + his_L[c] -> na1[c] + his_L[e] + phe_L[c]	-9057.1	9057.1		Transport, extracellular	0	0	1000	0	1		NOTES:
r1946	Y+LAT2 Utilized transport	na1[e] + citr_L[c] + phe_L[e] -> na1[c] + phe_L[c] + citr_L[e]	-9057.1	9057.1		Transport, extracellular	0	0	1000	0	1		NOTES:
r1947	Y+LAT2 Utilized transport	na1[e] + lys_L[c] + tyr_L[e] -> na1[c] + lys_L[e] + tyr_L[c]	-9057.1	9057.1		Transport, extracellular	0	0	1000	0	1		NOTES:
r1948	Y+LAT2 Utilized transport	na1[e] + arg_L[c] + tyr_L[e] -> na1[c] + arg_L[e] + tyr_L[c]	-9057.1	9057.1		Transport, extracellular	0	0	1000	0	1		NOTES:
r1949	Y+LAT2 Utilized transport	na1[e] + orn[c] + tyr_L[e] -> na1[c] + orn[e] + tyr_L[c]	-9057.1	9057.1		Transport, extracellular	0	0	1000	0	1		NOTES:
r1950	Y+LAT2 Utilized transport	na1[e] + tyr_L[e] + his_L[c] -> na1[c] + his_L[e] + tyr_L[c]	-9057.1	9057.1		Transport, extracellular	0	0	1000	0	1		NOTES:
r1951	Y+LAT2 Utilized transport	na1[e] + citr_L[c] + tyr_L[e] -> na1[c] + tyr_L[c] + citr_L[e]	-9057.1	9057.1		Transport, extracellular	0	0	1000	0	1		NOTES:
r1952	Y+LAT2 Utilized transport	na1[e] + cys_L[e] + lys_L[c] -> na1[c] + cys_L[c] + lys_L[e]	-9057.1	9057.1		Transport, extracellular	0	0	1000	0	1		NOTES:NCD
r1953	Y+LAT2 Utilized transport	na1[e] + cys_L[e] + arg_L[c] -> na1[c] + cys_L[c] + arg_L[e]	-9057.1	9057.1		Transport, extracellular	0	0	1000	0	1		NOTES:NCD	PMID:14514715
r1954	Y+LAT2 Utilized transport	na1[e] + orn[c] + cys_L[e] -> na1[c] + cys_L[c] + orn[e]	-9057.1	9057.1		Transport, extracellular	0	0	1000	0	1		NOTES:NCD rxn is now charge balanced - NCD	PMID:9159116
r1955	Y+LAT2 Utilized transport	na1[e] + cys_L[e] + his_L[c] -> na1[c] + cys_L[c] + his_L[e]	-9057.1	9057.1		Transport, extracellular	0	0	1000	0	1		NOTES:NCD rxn is now charge balanced - NCD	PMID:9159116
r1957	Y+LAT2 Utilized transport	na1[e] + lys_L[c] + leu_L[e] -> na1[c] + lys_L[e] + leu_L[c]	-9057.1	9057.1		Transport, extracellular	0	0	1000	0	1		NOTES:NCD	PMID:9159116
r1958	Y+LAT2 Utilized transport	na1[e] + arg_L[c] + leu_L[e] -> na1[c] + arg_L[e] + leu_L[c]	-9057.1	9057.1		Transport, extracellular	0	0	1000	0	0		NOTES:NCD	PMID:9159116
r1960	Y+LAT2 Utilized transport	na1[e] + leu_L[e] + his_L[c] -> na1[c] + his_L[e] + leu_L[c]	-9057.1	9057.1		Transport, extracellular	0	0	1000	0	0		NOTES:NCD	PMID:9159116
r1961	Y+LAT2 Utilized transport	na1[e] + citr_L[c] + leu_L[e] -> na1[c] + leu_L[c] + citr_L[e]	-9057.1	9057.1		Transport, extracellular	0	0	1000	0	4		NOTES:NCD	PMID:9159116
r1962	Y+LAT2 Utilized transport	na1[e] + lys_L[c] + pro_L[e] -> na1[c] + lys_L[e] + pro_L[c]	-9057.1	9057.1		Transport, extracellular	0	0	1000	0	4		NOTES:NCD	PMID:9159116
r1963	Y+LAT2 Utilized transport	na1[e] + arg_L[c] + pro_L[e] -> na1[c] + arg_L[e] + pro_L[c]	-9057.1	9057.1		Transport, extracellular	0	0	1000	0	4		NOTES:NJ	PMID:9159116
r1964	Y+LAT2 Utilized transport	na1[e] + orn[c] + pro_L[e] -> na1[c] + orn[e] + pro_L[c]	-9057.1	9057.1		Transport, extracellular	0	0	1000	0	4		NOTES:NJ	PMID:9159116
r1965	Y+LAT2 Utilized transport	na1[e] + pro_L[e] + his_L[c] -> na1[c] + his_L[e] + pro_L[c]	-9057.1	9057.1		Transport, extracellular	0	0	1000	0	4		NOTES:NCD	PMID:9159116
r1966	Y+LAT2 Utilized transport	na1[e] + citr_L[c] + pro_L[e] -> na1[c] + pro_L[c] + citr_L[e]	-9057.1	9057.1		Transport, extracellular	0	0	1000	0	4		NOTES:JLR
r1967	Y+LAT2 Utilized transport	na1[e] + asn_L[e] + lys_L[c] -> na1[c] + asn_L[c] + lys_L[e]	-9057.1	9057.1		Transport, extracellular	0	0	1000	0	4		NOTES:AR	PMID:15292367
r1968	Y+LAT2 Utilized transport	na1[e] + asn_L[e] + arg_L[c] -> na1[c] + asn_L[c] + arg_L[e]	-9057.1	9057.1		Transport, extracellular	0	0	1000	0	4		NOTES:TV catalyzed by acyl-CoA synthetases	PMID:1531127
r1969	Y+LAT2 Utilized transport	na1[e] + orn[c] + asn_L[e] -> na1[c] + asn_L[c] + orn[e]	-9057.1	9057.1		Transport, extracellular	0	0	1000	0	4		NOTES:
r1970	Y+LAT2 Utilized transport	na1[e] + asn_L[e] + his_L[c] -> na1[c] + asn_L[c] + his_L[e]	-9057.1	9057.1		Transport, extracellular	0	0	1000	0	4		NOTES:AR	PMID:15292367
r1971	Y+LAT2 Utilized transport	na1[e] + asn_L[e] + citr_L[c] -> na1[c] + asn_L[c] + citr_L[e]	-9057.1	9057.1		Transport, extracellular	0	0	1000	0	4		NOTES:TV catalyzed by acyl-CoA synthetases
r1972	Y+LAT2 Utilized transport	na1[e] + lys_L[c] + val_L[e] -> na1[c] + lys_L[e] + val_L[c]	-9057.1	9057.1		Transport, extracellular	0	0	1000	0	4		NOTES:NJ	PMID:15292367
r1973	Y+LAT2 Utilized transport	na1[e] + arg_L[c] + val_L[e] -> na1[c] + arg_L[e] + val_L[c]	-9057.1	9057.1		Transport, extracellular	0	0	1000	0	4		NOTES:NJ	PMID:15292367
r1974	Y+LAT2 Utilized transport	na1[e] + orn[c] + val_L[e] -> na1[c] + orn[e] + val_L[c]	-9057.1	9057.1		Transport, extracellular	0	0	1000	0	4		NOTES:TV catalyzed by acyl-CoA synthetases
r1975	Y+LAT2 Utilized transport	na1[e] + val_L[e] + his_L[c] -> na1[c] + his_L[e] + val_L[c]	-9057.1	9057.1		Transport, extracellular	0	0	1000	0	4		NOTES:NJ, RE1514C	PMID:15292367
r1976	Y+LAT2 Utilized transport	na1[e] + citr_L[c] + val_L[e] -> na1[c] + citr_L[e] + val_L[c]	-9057.1	9057.1		Transport, extracellular	0	0	1000	0	4		NOTES:NJ	PMID:15292367
r1977	Y+LAT2 Utilized transport	na1[e] + thr_L[e] + lys_L[c] -> na1[c] + thr_L[c] + lys_L[e]	-9057.1	9057.1		Transport, extracellular	0	0	1000	0	4		NOTES:NJ	PMID:15292367
r1978	Y+LAT2 Utilized transport	na1[e] + thr_L[e] + arg_L[c] -> na1[c] + thr_L[c] + arg_L[e]	-9057.1	9057.1		Transport, extracellular	0	0	1000	0	4		NOTES:NJ, RE3114C	PMID:15292367
r1979	Y+LAT2 Utilized transport	na1[e] + orn[c] + thr_L[e] -> na1[c] + thr_L[c] + orn[e]	-9057.1	9057.1		Transport, extracellular	0	0	1000	0	4		NOTES:NJ	PMID:15292367
r1980	Y+LAT2 Utilized transport	na1[e] + thr_L[e] + his_L[c] -> na1[c] + thr_L[c] + his_L[e]	-9057.1	9057.1		Transport, extracellular	0	0	1000	0	4		NOTES:current models suggest COAL activity occurs on outer peroxisomal membrane NJ	PMID:11591435
r1981	Y+LAT2 Utilized transport	na1[e] + thr_L[e] + citr_L[c] -> na1[c] + thr_L[c] + citr_L[e]	-9057.1	9057.1		Transport, extracellular	0	0	1000	0	4		NOTES:NJ	PMID:15292367
r1982	Y+LAT2 Utilized transport	na1[e] + lys_L[c] + hom_L[e] -> na1[c] + lys_L[e] + hom_L[c]	-9057.1	9057.1		Transport, extracellular	0	0	1000	0	4		NOTES:NJ	PMID:15292367
r1983	Y+LAT2 Utilized transport	na1[e] + arg_L[c] + hom_L[e] -> na1[c] + arg_L[e] + hom_L[c]	-9057.1	9057.1		Transport, extracellular	0	0	1000	0	4		NOTES:rev version so additional rxn doesn&apos;t need to be added to &quot;unload&quot; AA NJ. Merged GPR from FACOAL204 and FACOAL204i - (May 2011) IT	PMID:15292367
r1984	Y+LAT2 Utilized transport	na1[e] + orn[c] + hom_L[e] -> na1[c] + orn[e] + hom_L[c]	-9057.1	9057.1		Transport, extracellular	0	0	1000	0	4		NOTES:rev version so additional rxn doesn&apos;t need to be added to &quot;unload&quot; AA alternate to arachidonic acid (n-3 rather than n-6) NJ	PMID:15292367
r1985	Y+LAT2 Utilized transport	na1[e] + hom_L[e] + his_L[c] -> na1[c] + his_L[e] + hom_L[c]	-9057.1	9057.1		Transport, extracellular	0	0	1000	0	4		NOTES:NJ	PMID:15292367
r1986	Y+LAT2 Utilized transport	na1[e] + citr_L[c] + hom_L[e] -> na1[c] + hom_L[c] + citr_L[e]	-9057.1	9057.1		Transport, extracellular	0	0	1000	0	4		NOTES:NJ
r1987	Y+LAT2 Utilized transport	na1[e] + lys_L[c] + ile_L[e] -> na1[c] + lys_L[e] + ile_L[c]	-9057.1	9057.1		Transport, extracellular	0	0	1000	0	4		NOTES:NJ	PMID:15292367
r1988	Y+LAT2 Utilized transport	na1[e] + arg_L[c] + ile_L[e] -> na1[c] + arg_L[e] + ile_L[c]	-9057.1	9057.1		Transport, extracellular	0	0	1000	0	4		NOTES:NJ	PMID:15292367
r1989	Y+LAT2 Utilized transport	na1[e] + orn[c] + ile_L[e] -> na1[c] + orn[e] + ile_L[c]	-9057.1	9057.1		Transport, extracellular	0	0	1000	0	4		NOTES:NJ	PMID:15292367
r1990	Y+LAT2 Utilized transport	na1[e] + ile_L[e] + his_L[c] -> na1[c] + his_L[e] + ile_L[c]	-9057.1	9057.1		Transport, extracellular	0	0	1000	0	4		NOTES:NJ	PMID:15292367
r1991	Y+LAT2 Utilized transport	na1[e] + citr_L[c] + ile_L[e] -> na1[c] + ile_L[c] + citr_L[e]	-9057.1	9057.1		Transport, extracellular	0	0	1000	0	4		NOTES:NJ	PMID:15292367
r1992	Amino Acid-Polyamine-Organocation (APC) TCDB:2.A.3.8.15	gly[c] + lys_L[e] -> gly[e] + lys_L[c]	-9057.1	9057.1		Transport, extracellular	0	0	1000	0	4		NOTES:NJ	PMID:15292367
r1993	Amino Acid-Polyamine-Organocation (APC) TCDB:2.A.3.8.15	ala_L[c] + lys_L[e] -> ala_L[e] + lys_L[c]	-9057.1	9057.1		Transport, extracellular	0	0	1000	0	4		NOTES:NJ	PMID:15292367
r1994	Amino Acid-Polyamine-Organocation (APC) TCDB:2.A.3.8.15	gln_L[c] + lys_L[e] -> gln_L[e] + lys_L[c]	-9057.1	9057.1		Transport, extracellular	0	0	1000	0	4		NOTES:NJ	PMID:15292367
r1995	Amino Acid-Polyamine-Organocation (APC) TCDB:2.A.3.8.15	ser_L[c] + lys_L[e] -> ser_L[e] + lys_L[c]	-9057.1	9057.1		Transport, extracellular	0	0	1000	0	4		NOTES:NJ	PMID:15292367
r1996	Amino Acid-Polyamine-Organocation (APC) TCDB:2.A.3.8.15	lys_L[e] + met_L[c] -> lys_L[c] + met_L[e]	-9057.1	9057.1		Transport, extracellular	0	0	1000	0	4		NOTES:NJ	PMID:15292367
r1997	Amino Acid-Polyamine-Organocation (APC) TCDB:2.A.3.8.15	lys_L[e] + trp_L[c] -> lys_L[c] + trp_L[e]	-9057.1	9057.1		Transport, extracellular	0	0	1000	0	4		NOTES:cytoplasmic version -NJ	PMID:15292367
r1998	Amino Acid-Polyamine-Organocation (APC) TCDB:2.A.3.8.15	lys_L[e] + phe_L[c] -> lys_L[c] + phe_L[e]	-9057.1	9057.1		Transport, extracellular	0	0	1000	0	4		NOTES:JLR changed EC from 6.2.1.3 (long chain fatty-acyl CoA ligase) to 6.2.1.2 (butyrate-CoA ligase) - NCD	PMID:11470804,PMID:3297476
r1999	Amino Acid-Polyamine-Organocation (APC) TCDB:2.A.3.8.15	lys_L[e] + tyr_L[c] -> lys_L[c] + tyr_L[e]	-9057.1	9057.1		Transport, extracellular	0	0	1000	0	4		NOTES:JLR Also 6.2.1.3
r2000	Amino Acid-Polyamine-Organocation (APC) TCDB:2.A.3.8.15	cys_L[c] + lys_L[e] -> cys_L[e] + lys_L[c]	-9057.1	9057.1		Transport, extracellular	0	0	1000	0	4		NOTES:	PMID:1315502
r2001	Amino Acid-Polyamine-Organocation (APC) TCDB:2.A.3.8.15	lys_L[e] + leu_L[c] -> lys_L[c] + leu_L[e]	-9057.1	9057.1		Transport, extracellular	0	0	1000	0	4		NOTES:diffusion - but unidirectional uptake into ER (to avoid loops w/ NAD/NADP) NJ
r2002	Amino Acid-Polyamine-Organocation (APC) TCDB:2.A.3.8.15	lys_L[e] + pro_L[c] -> lys_L[c] + pro_L[e]	-9057.1	9057.1		Transport, extracellular	0	0	1000	0	4		NOTES:most likely NOT physiological - detailed information about the peroxisomal transporters has not yet been achieved - this transport is most likely dependent on a concomitant energy consuming reaction (human ABC peroxisomal transporters: PEX family - check in future for new research articles describing biochemistry and stoichiometry) NJ
r2003	Amino Acid-Polyamine-Organocation (APC) TCDB:2.A.3.8.15	asn_L[c] + lys_L[e] -> asn_L[e] + lys_L[c]	-9057.1	9057.1		Transport, extracellular	0	0	1000	0	4		NOTES:diffusion - but unidirectional output from ER (to avoid loops w/ NAD/NADP) NJ
r2004	Amino Acid-Polyamine-Organocation (APC) TCDB:2.A.3.8.15	lys_L[e] + val_L[c] -> lys_L[c] + val_L[e]	-9057.1	9057.1		Transport, extracellular	0	0	1000	0	4		NOTES:most likely NOT physiological - detailed information about the peroxisomal transporters has not yet been achieved - this transport is most likely dependent on a concomitant energy consuming reaction (human ABC peroxisomal transporters: PEX family - check in future for new research articles describing biochemistry and stoichiometry) NJ
r2005	Amino Acid-Polyamine-Organocation (APC) TCDB:2.A.3.8.15	thr_L[c] + lys_L[e] -> thr_L[e] + lys_L[c]	-9057.1	9057.1		Transport, extracellular	0	0	1000	0	2		NOTES:fatty acid elongation step NJ	PMID:11138005,PMID:15189125
r2007	Amino Acid-Polyamine-Organocation (APC) TCDB:2.A.3.8.15	lys_L[e] + ile_L[c] -> lys_L[c] + ile_L[e]	-9057.1	9057.1		Transport, extracellular	0	0	1000	0	1		NOTES:fatty acid elongation step NJ	PMID:11138005,PMID:15189125
r2008	Amino Acid-Polyamine-Organocation (APC) TCDB:2.A.3.8.15	gly[c] + arg_L[e] -> gly[e] + arg_L[c]	-9057.1	9057.1		Transport, extracellular	0	0	1000	0	1		NOTES:fatty acid elongation step NJ	PMID:11138005,PMID:15189125
r2009	Amino Acid-Polyamine-Organocation (APC) TCDB:2.A.3.8.15	ala_L[c] + arg_L[e] -> ala_L[e] + arg_L[c]	-9057.1	9057.1		Transport, extracellular	0	0	1000	0	1		NOTES:fatty acid elongation step NJ	PMID:11138005,PMID:15189125
r2011	Amino Acid-Polyamine-Organocation (APC) TCDB:2.A.3.8.15	ser_L[c] + arg_L[e] -> ser_L[e] + arg_L[c]	-9057.1	9057.1		Transport, extracellular	0	0	1000	0	1		NOTES:fatty acid hydroxylation NJ	PMID:11996015,PMID:7679927,PMID:8274222
r2012	Amino Acid-Polyamine-Organocation (APC) TCDB:2.A.3.8.15	arg_L[e] + met_L[c] -> arg_L[c] + met_L[e]	-9057.1	9057.1		Transport, extracellular	0	0	1000	0	4		NOTES:fatty acid omega hydroxylation NJ	PMID:11996015,PMID:7679927,PMID:8274222
r2013	Amino Acid-Polyamine-Organocation (APC) TCDB:2.A.3.8.15	arg_L[e] + trp_L[c] -> arg_L[c] + trp_L[e]	-9057.1	9057.1		Transport, extracellular	0	0	1000	0	4		NOTES:fatty acid omega hydroxylation NJ	PMID:11996015,PMID:7679927,PMID:8274222
r2014	Amino Acid-Polyamine-Organocation (APC) TCDB:2.A.3.8.15	arg_L[e] + phe_L[c] -> arg_L[c] + phe_L[e]	-9057.1	9057.1		Transport, extracellular	0	0	1000	0	4		NOTES:NCD	PMID:4436331,PMID:8460164
r2015	Amino Acid-Polyamine-Organocation (APC) TCDB:2.A.3.8.15	arg_L[e] + tyr_L[c] -> arg_L[c] + tyr_L[e]	-9057.1	9057.1		Transport, extracellular	0	0	1000	0	4		NOTES:NCD
r2016	Amino Acid-Polyamine-Organocation (APC) TCDB:2.A.3.8.15	cys_L[c] + arg_L[e] -> cys_L[e] + arg_L[c]	-9057.1	9057.1		Transport, extracellular	0	0	1000	0	4		NOTES:MM
r2017	Amino Acid-Polyamine-Organocation (APC) TCDB:2.A.3.8.15	arg_L[e] + leu_L[c] -> arg_L[c] + leu_L[e]	-9057.1	9057.1		Transport, extracellular	0	0	1000	0	4		NOTES:TV Other enzymes: 1.3.3.6, 4.2.1.74, 4.2.1.17, 1.1.1.35, 1.1.1.211 1 round of beta ox of branched chain FA from peroxisome NJ	PMID:9819701
r2018	Amino Acid-Polyamine-Organocation (APC) TCDB:2.A.3.8.15	arg_L[e] + pro_L[c] -> arg_L[c] + pro_L[e]	-9057.1	9057.1		Transport, extracellular	0	0	1000	0	4		NOTES:TV Other enzymes: 1.3.3.6, 4.2.1.74, 4.2.1.17, 1.1.1.35, 1.1.1.211	PMID:2565344
r2019	Amino Acid-Polyamine-Organocation (APC) TCDB:2.A.3.8.15	asn_L[c] + arg_L[e] -> asn_L[e] + arg_L[c]	-9057.1	9057.1		Transport, extracellular	0	0	1000	0	4		NOTES:by extension from even chain lumped FAO - should double-check stoich in future NJ	PMID:2565344
r2020	Amino Acid-Polyamine-Organocation (APC) TCDB:2.A.3.8.15	arg_L[e] + val_L[c] -> arg_L[c] + val_L[e]	-9057.1	9057.1		Transport, extracellular	0	0	1000	0	1		NOTES:TV Other enzymes: 1.3.3.6, 4.2.1.74, 4.2.1.17, 1.1.1.35, 1.1.1.211	PMID:2565344,PMID:3035565
r2021	Amino Acid-Polyamine-Organocation (APC) TCDB:2.A.3.8.15	thr_L[c] + arg_L[e] -> thr_L[e] + arg_L[c]	-9057.1	9057.1		Transport, extracellular	0	0	1000	0	1		NOTES:_4 rounds of beta ox c16:0 -&gt; c8:0, 4 step FAO lumped for 2 rounds also includes EC 1.1.1.35, 1.1.1.211, 1.3.3.6, 4.2.1.17, 4.2.1.74 NJ
r2022	Amino Acid-Polyamine-Organocation (APC) TCDB:2.A.3.8.15	arg_L[e] + hom_L[c] -> arg_L[c] + hom_L[e]	-9057.1	9057.1		Transport, extracellular	0	0	1000	0	2		NOTES:_4 rounds of beta ox - in peroxisome, no fad, 1ste set of beta-ox is by acyl-coa oxidase (passes electrons directly to o2 -&gt; h2o2) c16:0 -&gt; c8:0, 4 step FAO lumped for 2 rounds also includes EC 1.1.1.35, 1.1.1.211, 1.3.3.6, 4.2.1.17, 4.2.1.74 NJ
r2023	Amino Acid-Polyamine-Organocation (APC) TCDB:2.A.3.8.15	arg_L[e] + ile_L[c] -> arg_L[c] + ile_L[e]	-9057.1	9057.1		Transport, extracellular	0	0	1000	0	4		NOTES:_4 rounds of beta ox, 1 loss of degree of unsat -&gt; only 3 fad oxidized c16:1 -&gt; c8:0 4 step FAO lumped for 2 rounds also includes EC 1.1.1.35, 1.1.1.211, 1.3.3.6, 4.2.1.17, 4.2.1.74 NJ
r2024	Amino Acid-Polyamine-Organocation (APC) TCDB:2.A.3.8.15	gly[c] + orn[e] -> orn[c] + gly[e]	-9057.1	9057.1		Transport, extracellular	0	0	1000	0	4		NOTES:_4 rounds of beta ox, 1 loss of degree of unsat -&gt; only 3 fad oxidized c16:1 -&gt; c8:0 4 step FAO lumped for 2 rounds also includes EC 1.1.1.35, 1.1.1.211, 1.3.3.6, 4.2.1.17, 4.2.1.74 NJ
r2026	Amino Acid-Polyamine-Organocation (APC) TCDB:2.A.3.8.15	gln_L[c] + orn[e] -> orn[c] + gln_L[e]	-9057.1	9057.1		Transport, extracellular	0	0	1000	0	4		NOTES:by extension from even chain lumped FAO - should double-check stoich in future NJ	PMID:2565344
r2027	Amino Acid-Polyamine-Organocation (APC) TCDB:2.A.3.8.15	ser_L[c] + orn[e] -> orn[c] + ser_L[e]	-9057.1	9057.1		Transport, extracellular	0	0	1000	0	4		NOTES:TV Other enzymes: 1.3.3.6, 4.2.1.74, 4.2.1.17, 1.1.1.35, 1.1.1.211	PMID:2565344,PMID:3035565
r2028	Amino Acid-Polyamine-Organocation (APC) TCDB:2.A.3.8.15	met_L[c] + orn[e] -> orn[c] + met_L[e]	-9057.1	9057.1		Transport, extracellular	0	0	1000	0	4		NOTES:- in peroxisome, no fad, 1ste set of beta-ox is by acyl-coa oxidase (passes electrons directly to o2 -&gt; h2o2) NJ
r2029	Amino Acid-Polyamine-Organocation (APC) TCDB:2.A.3.8.15	orn[e] + trp_L[c] -> orn[c] + trp_L[e]	-9057.1	9057.1		Transport, extracellular	0	0	1000	0	4		NOTES:_5 rounds of beta ox, 1 loss of degree of unsat -&gt; 4 fad oxidized c18:1 -&gt; c8:0 4 step FAO lumped for 2 rounds also includes EC 1.1.1.35, 1.1.1.211, 1.3.3.6, 4.2.1.17, 4.2.1.74 NJ
r2030	Amino Acid-Polyamine-Organocation (APC) TCDB:2.A.3.8.15	orn[e] + phe_L[c] -> orn[c] + phe_L[e]	-9057.1	9057.1		Transport, extracellular	0	0	1000	0	4		NOTES:_5 rounds of beta ox, 1 loss of degree of unsat -&gt; 4 fad oxidized c18:1 -&gt; c8:0 4 step FAO lumped for 2 rounds also includes EC 1.1.1.35, 1.1.1.211, 1.3.3.6, 4.2.1.17, 4.2.1.74 NJ
r2031	Amino Acid-Polyamine-Organocation (APC) TCDB:2.A.3.8.15	orn[e] + tyr_L[c] -> orn[c] + tyr_L[e]	-9057.1	9057.1		Transport, extracellular	0	0	1000	0	4		NOTES:_5 rounds of beta ox, 1 loss of degree of unsat -&gt; 4 fad oxidized c18:1 -&gt; c8:0 4 step FAO lumped for 2 rounds also includes EC 1.1.1.35, 1.1.1.211, 1.3.3.6, 4.2.1.17, 4.2.1.74 NJ
r2032	Amino Acid-Polyamine-Organocation (APC) TCDB:2.A.3.8.15	cys_L[c] + orn[e] -> orn[c] + cys_L[e]	-9057.1	9057.1		Transport, extracellular	0	0	1000	0	4		NOTES:c18:2,n-6 -&gt; c8:0 - 5 rounds of beta ox, lose 2 degrees of unsat - only 3 fad oxidized 4 step FAO lumped also includes EC 1.1.1.35, 1.1.1.211, 1.3.3.6, 4.2.1.17, 4.2.1.74 NJ
r2034	Amino Acid-Polyamine-Organocation (APC) TCDB:2.A.3.8.15	orn[e] + pro_L[c] -> orn[c] + pro_L[e]	-9057.1	9057.1		Transport, extracellular	0	0	1000	0	4		NOTES:c18:2, transe -&gt; c8:0 - 5 rounds of beta ox, lose 2 degrees of unsat - only 3 fad oxidized 4 step FAO lumped also includes EC 1.1.1.35, 1.1.1.211, 1.3.3.6, 4.2.1.17, 4.2.1.74 NJ
r2035	Amino Acid-Polyamine-Organocation (APC) TCDB:2.A.3.8.15	asn_L[c] + orn[e] -> orn[c] + asn_L[e]	-9057.1	9057.1		Transport, extracellular	0	0	1000	0	4		NOTES:c18:3, n-3 -&gt; c8:0 - 5 rounds of beta ox, lose 3 degrees of unsat - only 2 fad oxidized 4 step FAO lumped also includes EC 1.1.1.35, 1.1.1.211, 1.3.3.6, 4.2.1.17, 4.2.1.74 NJ
r2036	Amino Acid-Polyamine-Organocation (APC) TCDB:2.A.3.8.15	orn[e] + val_L[c] -> orn[c] + val_L[e]	-9057.1	9057.1		Transport, extracellular	0	0	1000	0	4		NOTES:_5 rounds of beta ox, 3 degrees loss of saturation -&gt; only 2 fad oxidized to fadh2 - in peroxisome, no fad, 1ste set of beta-ox is by acyl-coa oxidase (passes electrons directly to o2 -&gt; h2o2) peroxisomal (very long chain FA) c18:3,n-6 -&gt; c8:0, 4 step FAO lumped for 2 rounds also includes EC 1.1.1.35, 1.1.1.211, 1.3.3.6, 4.2.1.17, 4.2.1.74 NJ
r2037	Amino Acid-Polyamine-Organocation (APC) TCDB:2.A.3.8.15	thr_L[c] + orn[e] -> orn[c] + thr_L[e]	-9057.1	9057.1		Transport, extracellular	0	0	1000	0	4		NOTES:_5 rounds of beta ox, 3 degrees loss of saturation -&gt; only 2 fad oxidized to fadh2 - in peroxisome, no fad, 1ste set of beta-ox is by acyl-coa oxidase (passes electrons directly to o2 -&gt; h2o2) peroxisomal (very long chain FA) c18:3,n-6 -&gt; c8:0, 4 step FAO lumped for 2 rounds also includes EC 1.1.1.35, 1.1.1.211, 1.3.3.6, 4.2.1.17, 4.2.1.74 NJ
r2038	Amino Acid-Polyamine-Organocation (APC) TCDB:2.A.3.8.15	orn[e] + hom_L[c] -> orn[c] + hom_L[e]	-9057.1	9057.1		Transport, extracellular	0	0	1000	0	4		NOTES:_5 rounds of beta ox, 4 degrees loss of saturation -&gt; only 1 fad oxidized to fadh2 peroxisomal (very long chain FA) c18:4,n-6 -&gt; c8:0, 4 step FAO lumped for 2 rounds also includes EC 1.1.1.35, 1.1.1.211, 1.3.3.6, 4.2.1.17, 4.2.1.74 NJ
r2039	Amino Acid-Polyamine-Organocation (APC) TCDB:2.A.3.8.15	orn[e] + ile_L[c] -> orn[c] + ile_L[e]	-9057.1	9057.1		Transport, extracellular	0	0	1000	0	4		NOTES:_5 rounds of beta ox, 4 degrees loss of saturation -&gt; only 1 fad oxidized to fadh2 - in peroxisome, no fad, 1ste set of beta-ox is by acyl-coa oxidase (passes electrons directly to o2 -&gt; h2o2) peroxisomal (very long chain FA) c18:4,n-6 -&gt; c8:0, 4 step FAO lumped for 2 rounds also includes EC 1.1.1.35, 1.1.1.211, 1.3.3.6, 4.2.1.17, 4.2.1.74 NJ
r2040	Amino Acid-Polyamine-Organocation (APC) TCDB:2.A.3.8.15	gly[c] + his_L[e] -> gly[e] + his_L[c]	-9057.1	9057.1		Transport, extracellular	0	0	1000	0	4		NOTES:c20:0 -&gt; c18:0 4 step FAO lumped also includes EC 1.1.1.35, 1.1.1.211, 1.3.3.6, 4.2.1.17, 4.2.1.74 NJ
r2041	Amino Acid-Polyamine-Organocation (APC) TCDB:2.A.3.8.15	ala_L[c] + his_L[e] -> ala_L[e] + his_L[c]	-9057.1	9057.1		Transport, extracellular	0	0	1000	0	4		NOTES:peroxisomal (very long chain FA) - in peroxisome, no fad, 1ste set of beta-ox is by acyl-coa oxidase (passes electrons directly to o2 -&gt; h2o2) c20:0 -&gt; c18:0 4 step FAO lumped also includes EC 1.1.1.35, 1.1.1.211, 1.3.3.6, 4.2.1.17, 4.2.1.74 NJ
r2042	Amino Acid-Polyamine-Organocation (APC) TCDB:2.A.3.8.15	gln_L[c] + his_L[e] -> gln_L[e] + his_L[c]	-9057.1	9057.1		Transport, extracellular	0	0	1000	0	4		NOTES:c20:3 -&gt; c18:3 4 step FAO lumped also includes EC 1.1.1.35, 1.1.1.211, 1.3.3.6, 4.2.1.17, 4.2.1.74 NJ
r2043	Amino Acid-Polyamine-Organocation (APC) TCDB:2.A.3.8.15	ser_L[c] + his_L[e] -> ser_L[e] + his_L[c]	-9057.1	9057.1		Transport, extracellular	0	0	1000	0	4		NOTES:TV Other enzymes: 1.3.3.6, 4.2.1.74, 4.2.1.17, 1.1.1.35, 1.1.1.211	PMID:2565344,PMID:3035565
r2044	Amino Acid-Polyamine-Organocation (APC) TCDB:2.A.3.8.15	met_L[c] + his_L[e] -> met_L[e] + his_L[c]	-9057.1	9057.1		Transport, extracellular	0	0	1000	0	4		NOTES:_1 rounds of beta ox c20:4 -&gt; c18:4 4 step FAO lumped for 2 rounds also includes EC 1.1.1.35, 1.1.1.211, 1.3.3.6, 4.2.1.17, 4.2.1.74 NJ
r2045	Amino Acid-Polyamine-Organocation (APC) TCDB:2.A.3.8.15	his_L[e] + trp_L[c] -> trp_L[e] + his_L[c]	-9057.1	9057.1		Transport, extracellular	0	0	1000	0	4		NOTES:_1 round beta ox, 1 degree loss of sat -&gt; no fad oxidation peroxisomal (very long chain FA) c20:5,n-3 -&gt; c18:4, n-3 - final &apos;3&apos; in abbreviation indicates omega3 FA 4 step FAO lumped for 2 rounds also includes EC 1.1.1.35, 1.1.1.211, 1.3.3.6, 4.2.1.17, 4.2.1.74 NJ
r2046	Amino Acid-Polyamine-Organocation (APC) TCDB:2.A.3.8.15	his_L[e] + phe_L[c] -> phe_L[e] + his_L[c]	-9057.1	9057.1		Transport, extracellular	0	0	1000	0	4		NOTES:_1 round beta ox, 1 degree loss of sat -&gt; no fad oxidation - in peroxisome, no fad, 1ste set of beta-ox is by acyl-coa oxidase (passes electrons directly to o2 -&gt; h2o2) peroxisomal (very long chain FA) c20:5,n-3 -&gt; c18:4, n-3 - final &apos;3&apos; in abbreviation indicates omega3 FA 4 step FAO lumped for 2 rounds also includes EC 1.1.1.35, 1.1.1.211, 1.3.3.6, 4.2.1.17, 4.2.1.74 NJ
r2047	Amino Acid-Polyamine-Organocation (APC) TCDB:2.A.3.8.15	his_L[e] + tyr_L[c] -> tyr_L[e] + his_L[c]	-9057.1	9057.1		Transport, extracellular	0	0	1000	0	4		NOTES:_1 round beta ox peroxisomal (very long chain FA) c22:4,n-6 -&gt; c20:4, n-6 - final &apos;6&apos; in abbreviation indicates omega6 FA 4 step FAO lumped for 2 rounds also includes EC 1.1.1.35, 1.1.1.211, 1.3.3.6, 4.2.1.17, 4.2.1.74 NJ
r2048	Amino Acid-Polyamine-Organocation (APC) TCDB:2.A.3.8.15	cys_L[c] + his_L[e] -> cys_L[e] + his_L[c]	-9057.1	9057.1		Transport, extracellular	0	0	1000	0	4		NOTES:_1 round beta ox - in peroxisome, no fad, 1ste set of beta-ox is by acyl-coa oxidase (passes electrons directly to o2 -&gt; h2o2) peroxisomal (very long chain FA) c22:4,n-6 -&gt; c20:4, n-6 - final &apos;6&apos; in abbreviation indicates omega6 FA 4 step FAO lumped for 2 rounds also includes EC 1.1.1.35, 1.1.1.211, 1.3.3.6, 4.2.1.17, 4.2.1.74 NJ
r2049	Amino Acid-Polyamine-Organocation (APC) TCDB:2.A.3.8.15	his_L[e] + leu_L[c] -> leu_L[e] + his_L[c]	-9057.1	9057.1		Transport, extracellular	0	0	1000	0	4		NOTES:_2 rounds of beta-ox, plus a loss of 2 degrees of desatuartion, so no fad is oxidized peroxisomal (very long chain FA) c22:5,n-6 -&gt; c18:3, n-6 - final &apos;6&apos; in abbreviation indicates omega6 FA 4 step FAO lumped for 2 rounds also includes EC 1.1.1.35, 1.1.1.211, 1.3.3.6, 4.2.1.17, 4.2.1.74 NJ
r2050	Amino Acid-Polyamine-Organocation (APC) TCDB:2.A.3.8.15	his_L[e] + pro_L[c] -> pro_L[e] + his_L[c]	-9057.1	9057.1		Transport, extracellular	0	0	1000	0	4		NOTES:_2 rounds of beta-ox, plus a loss of 2 degrees of desatuartion, so no fad is oxidized - in peroxisome, no fad, 1ste set of beta-ox is by acyl-coa oxidase (passes electrons directly to o2 -&gt; h2o2) peroxisomal (very long chain FA) c22:5,n-6 -&gt; c18:3, n-6 - final &apos;6&apos; in abbreviation indicates omega6 FA 4 step FAO lumped for 2 rounds also includes EC 1.1.1.35, 1.1.1.211, 1.3.3.6…
r2051	Amino Acid-Polyamine-Organocation (APC) TCDB:2.A.3.8.15	asn_L[c] + his_L[e] -> asn_L[e] + his_L[c]	-9057.1	9057.1		Transport, extracellular	0	0	1000	0	4		NOTES:_1 round beta ox - c22:5,n-3 -&gt; c20:5, n-3 - final &apos;3&apos; in abbreviation indicates omega3 FA 4 step FAO lumped for 2 rounds also includes EC 1.1.1.35, 1.1.1.211, 1.3.3.6, 4.2.1.17, 4.2.1.74 NJ
r2052	Amino Acid-Polyamine-Organocation (APC) TCDB:2.A.3.8.15	his_L[e] + val_L[c] -> val_L[e] + his_L[c]	-9057.1	9057.1		Transport, extracellular	0	0	1000	0	4		NOTES:_1 round beta ox - in peroxisome, no fad, 1ste set of beta-ox is by acyl-coa oxidase (passes electrons directly to o2 -&gt; h2o2) peroxisomal (very long chain FA) c22:5,n-3 -&gt; c20:5, n-3 - final &apos;3&apos; in abbreviation indicates omega3 FA 4 step FAO lumped for 2 rounds also includes EC 1.1.1.35, 1.1.1.211, 1.3.3.6, 4.2.1.17, 4.2.1.74 NJ
r2053	Amino Acid-Polyamine-Organocation (APC) TCDB:2.A.3.8.15	thr_L[c] + his_L[e] -> thr_L[e] + his_L[c]	-9057.1	9057.1		Transport, extracellular	0	0	1000	0	4		NOTES:TV Other enzymes: 1.3.3.6, 4.2.1.74, 4.2.1.17, 1.1.1.35, 1.1.1.211	PMID:2565344,PMID:3035565
r2054	Amino Acid-Polyamine-Organocation (APC) TCDB:2.A.3.8.15	his_L[e] + hom_L[c] -> hom_L[e] + his_L[c]	-9057.1	9057.1		Transport, extracellular	0	0	1000	0	4		NOTES:_1 round of beta-oxidation, loses degree of desat, so no fad peroxisomal (very long chain FA) c22:6,n-3 -&gt; c20:5, n-3 4 step FAO lumped also includes EC 1.1.1.35, 1.1.1.211, 1.3.3.6, 4.2.1.17, 4.2.1.74 NJ	PMID:2565344,PMID:3035565
r2055	Amino Acid-Polyamine-Organocation (APC) TCDB:2.A.3.8.15	his_L[e] + ile_L[c] -> ile_L[e] + his_L[c]	-9057.1	9057.1		Transport, extracellular	0	0	1000	0	4		NOTES:_1 round of beta-oxidation, loses degree of desat, so no fad - in peroxisome, no fad, 1ste set of beta-ox is by acyl-coa oxidase (passes electrons directly to o2 -&gt; h2o2) peroxisomal (very long chain FA) c22:6,n-3 -&gt; c20:5, n-3 4 step FAO lumped also includes EC 1.1.1.35, 1.1.1.211, 1.3.3.6, 4.2.1.17, 4.2.1.74 NJ
r2056	Amino Acid-Polyamine-Organocation (APC) TCDB:2.A.3.8.15	gly[c] + citr_L[e] -> gly[e] + citr_L[c]	-9057.1	9057.1		Transport, extracellular	0	0	1000	0	4		NOTES:peroxisomal (very long chain FA) - in peroxisome, no fad, 1ste set of beta-ox is by acyl-coa oxidase (passes electrons directly to o2 -&gt; h2o2) c24:0 -&gt; c20:0 4 step FAO lumped for 2 rounds also includes EC 1.1.1.35, 1.1.1.211, 1.3.3.6, 4.2.1.17, 4.2.1.74 NJ
r2057	Amino Acid-Polyamine-Organocation (APC) TCDB:2.A.3.8.15	ala_L[c] + citr_L[e] -> ala_L[e] + citr_L[c]	-9057.1	9057.1		Transport, extracellular	0	0	1000	0	4		NOTES:peroxisomal (very long chain FA) - in peroxisome, no fad, 1ste set of beta-ox is by acyl-coa oxidase (passes electrons directly to o2 -&gt; h2o2) c24:1 -&gt; c18:1 - 3 rounds beta-ox 4 step FAO lumped also includes EC 1.1.1.35, 1.1.1.211, 1.3.3.6, 4.2.1.17, 4.2.1.74 NJ
r2058	Amino Acid-Polyamine-Organocation (APC) TCDB:2.A.3.8.15	gln_L[c] + citr_L[e] -> gln_L[e] + citr_L[c]	-9057.1	9057.1		Transport, extracellular	0	0	1000	0	4		NOTES:_1 round beta ox - - in peroxisome, no fad, 1ste set of beta-ox is by acyl-coa oxidase (passes electrons directly to o2 -&gt; h2o2) peroxisomal (very long chain FA) c24:4,n-6 -&gt; c22:4, n-6 - final &apos;6&apos; in abbreviation indicates omega6 FA 4 step FAO lumped for 2 rounds also includes EC 1.1.1.35, 1.1.1.211, 1.3.3.6, 4.2.1.17, 4.2.1.74 NJ
r2059	Amino Acid-Polyamine-Organocation (APC) TCDB:2.A.3.8.15	ser_L[c] + citr_L[e] -> ser_L[e] + citr_L[c]	-9057.1	9057.1		Transport, extracellular	0	0	1000	0	4		NOTES:- in peroxisome, no fad, 1ste set of beta-ox is by acyl-coa oxidase (passes electrons directly to o2 -&gt; h2o2) confusing name, sorry - accounting for omega3 vs omega6 FA peroxisomal (very long chain FA) c24:5,n-3 -&gt; c22:5, n-3 4 step FAO lumped also includes EC 1.1.1.35, 1.1.1.211, 1.3.3.6, 4.2.1.17, 4.2.1.74 NJ
r2060	Amino Acid-Polyamine-Organocation (APC) TCDB:2.A.3.8.15	met_L[c] + citr_L[e] -> citr_L[c] + met_L[e]	-9057.1	9057.1		Transport, extracellular	0	0	1000	0	4		NOTES:peroxisomal (very long chain FA) - - in peroxisome, no fad, 1ste set of beta-ox is by acyl-coa oxidase (passes electrons directly to o2 -&gt; h2o2) c24:5,n-6 -&gt; c22:5, n-6 4 step FAO lumped also includes EC 1.1.1.35, 1.1.1.211, 1.3.3.6, 4.2.1.17, 4.2.1.74 NJ
r2061	Amino Acid-Polyamine-Organocation (APC) TCDB:2.A.3.8.15	trp_L[c] + citr_L[e] -> citr_L[c] + trp_L[e]	-9057.1	9057.1		Transport, extracellular	0	0	1000	0	4		NOTES:peroxisomal (very long chain FA) - - in peroxisome, no fad, 1ste set of beta-ox is by acyl-coa oxidase (passes electrons directly to o2 -&gt; h2o2) c24:6 -&gt; c22:6 4 step FAO lumped also includes EC 1.1.1.35, 1.1.1.211, 1.3.3.6, 4.2.1.17, 4.2.1.74 NJ
r2062	Amino Acid-Polyamine-Organocation (APC) TCDB:2.A.3.8.15	phe_L[c] + citr_L[e] -> citr_L[c] + phe_L[e]	-9057.1	9057.1		Transport, extracellular	0	0	1000	0	4		NOTES:peroxisomal (very long chain FA) - in peroxisome, no fad, 1ste set of beta-ox is by acyl-coa oxidase (passes electrons directly to o2 -&gt; h2o2) c26:0 -&gt; c24:0 4 step FAO lumped also includes EC 1.1.1.35, 1.1.1.211, 1.3.3.6, 4.2.1.17, 4.2.1.74 -&gt; into pmtcoa NJ
r2063	Amino Acid-Polyamine-Organocation (APC) TCDB:2.A.3.8.15	tyr_L[c] + citr_L[e] -> citr_L[c] + tyr_L[e]	-9057.1	9057.1		Transport, extracellular	0	0	1000	0	4		NOTES:TDV (9/7/2004) Other enzymes: 1.3.3.6, 4.2.1.74, 4.2.1.17, 1.1.1.35, 1.1.1.211	PMID:2565344,PMID:3035565
r2064	Amino Acid-Polyamine-Organocation (APC) TCDB:2.A.3.8.15	cys_L[c] + citr_L[e] -> cys_L[e] + citr_L[c]	-9057.1	9057.1		Transport, extracellular	0	0	1000	0	4		NOTES:NCD	PMID:11756679,PMID:15507492,PMID:2669958
r2065	Amino Acid-Polyamine-Organocation (APC) TCDB:2.A.3.8.15	leu_L[c] + citr_L[e] -> citr_L[c] + leu_L[e]	-9057.1	9057.1		Transport, extracellular	0	0	1000	0	4		NOTES:NCD	PMID:11756679,PMID:15507492
r2066	Amino Acid-Polyamine-Organocation (APC) TCDB:2.A.3.8.15	pro_L[c] + citr_L[e] -> citr_L[c] + pro_L[e]	-9057.1	9057.1		Transport, extracellular	0	0	1000	0	4		NOTES:NCD	PMID:11756679,PMID:15507492,PMID:2669958
r2067	Amino Acid-Polyamine-Organocation (APC) TCDB:2.A.3.8.15	asn_L[c] + citr_L[e] -> asn_L[e] + citr_L[c]	-9057.1	9057.1		Transport, extracellular	0	0	1000	0	4		NOTES:NCD	PMID:11756679,PMID:15507492,PMID:2669958
r2068	Amino Acid-Polyamine-Organocation (APC) TCDB:2.A.3.8.15	citr_L[e] + val_L[c] -> citr_L[c] + val_L[e]	-9057.1	9057.1		Transport, extracellular	0	0	1000	0	4		NOTES:NCD	PMID:11756679,PMID:15507492,PMID:2669958
r2069	Amino Acid-Polyamine-Organocation (APC) TCDB:2.A.3.8.15	thr_L[c] + citr_L[e] -> thr_L[e] + citr_L[c]	-9057.1	9057.1		Transport, extracellular	0	0	1000	0	4		NOTES:NCD	PMID:11756679,PMID:15507492,PMID:2669958
r2070	Amino Acid-Polyamine-Organocation (APC) TCDB:2.A.3.8.15	hom_L[c] + citr_L[e] -> citr_L[c] + hom_L[e]	-9057.1	9057.1		Transport, extracellular	0	0	1000	0	4		NOTES:electroneutral transport NJ	PMID:12856180,PMID:15522816,PMID:9878842
r2071	Amino Acid-Polyamine-Organocation (APC) TCDB:2.A.3.8.15	ile_L[c] + citr_L[e] -> citr_L[c] + ile_L[e]	-9057.1	9057.1		Transport, extracellular	0	0	1000	0	4		NOTES:electroneutral transport NJ	PMID:12856180,PMID:15522816
r2073	Zinc (Zn2+)-Iron (Fe2+) Permease (ZIP), TCDB:2.A.55.2.3	h[e] + HC02172[e] -> h[c] + HC02172[c]	-9057.1	9057.1		Transport, extracellular	0	0	1000	0	4		NOTES:electroneutral transport NJ	PMID:12856180,PMID:15522816
r2375	Mitochondrial Carrier (MC) TCDB:2.A.29.7.2	icit[m] + succ[c] <=> icit[c] + succ[m]				Transport, mitochondrial	1	-1000	1000	0	4		NOTES:electroneutral transport NJ	PMID:10479480,PMID:12856180,PMID:15522816
r2376	Mitochondrial Carrier (MC) TCDB:2.A.29.7.2	icit[m] + oxa[c] <=> icit[c] + oxa[m]				Transport, mitochondrial	1	-1000	1000	0	4		NOTES:electroneutral transport NJ	PMID:10479480,PMID:12856180,PMID:15522816
r2381	Mitochondrial Carrier (MC) TCDB:2.A.29.7.2	h[c] + akg[m] + cit[c] -> h[m] + akg[c] + cit[m]				Transport, mitochondrial	0	0	1000	0	4		NOTES:electroneutral transport NJ	PMID:10479480,PMID:12856180,PMID:15522816
r2382	Mitochondrial Carrier (MC) TCDB:2.A.29.7.2	h[c] + cit[c] + succ[m] -> h[m] + cit[m] + succ[c]	(215.1) or (U52111.1)	215.1 U52111.1		Transport, mitochondrial	0	0	1000	0	4		NOTES:electroneutral transport NJ	PMID:10479480,PMID:12856180,PMID:15522816
r2384	Mitochondrial Carrier (MC) TCDB:2.A.29.7.2	h[c] + cit[c] + oxa[m] -> h[m] + cit[m] + oxa[c]	(215.1) or (U52111.1)	215.1 U52111.1		Transport, mitochondrial	0	0	1000	0	4		NOTES:electroneutral transport NJ	PMID:10479480,PMID:12856180,PMID:15522816
r2386	Mitochondrial Carrier (MC) TCDB:2.A.29.7.2	h[c] + icit[c] + succ[m] -> h[m] + icit[m] + succ[c]	(215.1) or (U52111.1)	215.1 U52111.1		Transport, mitochondrial	0	0	1000	0	4		NOTES:electroneutral transport NJ	PMID:10479480,PMID:12856180,PMID:15522816
r2387	Mitochondrial Carrier (MC) TCDB:2.A.29.7.2	h[c] + icit[c] + mal_L[m] -> h[m] + icit[m] + mal_L[c]	(215.1) or (U52111.1)	215.1 U52111.1		Transport, mitochondrial	0	0	1000	0	4		NOTES:6765112 - fluorescence of presence in human brain	PMID:12626877,PMID:6765112
r2388	Mitochondrial Carrier (MC) TCDB:2.A.29.7.2	h[c] + icit[c] + oxa[m] -> h[m] + icit[m] + oxa[c]	(215.1) or (U52111.1)	215.1 U52111.1		Transport, mitochondrial	0	0	1000	0	4		NOTES:NCD
r2389	Mitochondrial Carrier (MC) TCDB:2.A.29.7.2	h[c] + akg[m] + HC00342[c] -> h[m] + akg[c] + HC00342[m]	(215.1) or (U52111.1)	215.1 U52111.1		Transport, mitochondrial	0	0	1000	0	4		NOTES:NCD	PMID:2996495,PMID:6284103,PMID:6298387
r2390	Mitochondrial Carrier (MC) TCDB:2.A.29.7.2	h[c] + succ[m] + HC00342[c] -> h[m] + succ[c] + HC00342[m]				Transport, mitochondrial	0	0	1000	0	4		NOTES:NCD	PMID:2996495,PMID:6284103,PMID:6298387
r2391	Mitochondrial Carrier (MC) TCDB:2.A.29.7.2	h[c] + mal_L[m] + HC00342[c] -> h[m] + mal_L[c] + HC00342[m]				Transport, mitochondrial	0	0	1000	0	4		NOTES:SMP	PMID:9678974
r2392	Mitochondrial Carrier (MC) TCDB:2.A.29.7.2	h[c] + HC00342[c] + oxa[m] -> h[m] + oxa[c] + HC00342[m]				Transport, mitochondrial	0	0	1000	0	0		NOTES:IF
r2395	Mitochondrial Carrier (MC) TCDB:2.A.29.19.1	h[c] + lys_L[m] + arg_L[c] -> h[m] + lys_L[c] + arg_L[m]				Transport, mitochondrial	0	0	1000	0	2		NOTES:NCD; r0096	PMID:7983009
r2396	Mitochondrial Carrier (MC) TCDB:2.A.29.19.1	h[c] + orn[c] + lys_L[m] -> h[m] + lys_L[c] + orn[m]				Transport, mitochondrial	0	0	1000	0	4		NOTES:Note - formcoa formula is uncharged - the correct is FACOAH2 w/ forcoa NJ	PMID:11341778,PMID:11591435
r2397	Mitochondrial Carrier (MC) TCDB:2.A.29.19.1	h[c] + lys_L[m] + his_L[c] -> h[m] + lys_L[c] + his_L[m]				Transport, mitochondrial	0	0	1000	0	4		NOTES:
r2398	Mitochondrial Carrier (MC) TCDB:2.A.29.19.1	h[c] + lys_L[m] + citr_L[c] -> h[m] + lys_L[c] + citr_L[m]				Transport, mitochondrial	0	0	1000	0	0		NOTES:	PMID:12440707
r2399	Mitochondrial Carrier (MC) TCDB:2.A.29.19.1	h[c] + lys_L[c] + arg_L[m] -> h[m] + lys_L[m] + arg_L[c]				Transport, mitochondrial	0	0	1000	0	0		NOTES:TDV Lange H, 1999.	PMID:10383398,PMID:12755454
r2400	Mitochondrial Carrier (MC) TCDB:2.A.29.19.1	h[c] + orn[c] + arg_L[m] -> h[m] + arg_L[c] + orn[m]				Transport, mitochondrial	0	0	1000	0	2		NOTES:stoichiometry unknown; inferred from EC1.16.1.7 NCD	PMID:11230685,PMID:12755454
r2401	Mitochondrial Carrier (MC) TCDB:2.A.29.19.1	h[c] + arg_L[m] + his_L[c] -> h[m] + arg_L[c] + his_L[m]				Transport, mitochondrial	0	0	1000	0	2		NOTES:kh 1/6/03 NCD
r2402	Mitochondrial Carrier (MC) TCDB:2.A.29.19.1	h[c] + arg_L[m] + citr_L[c] -> h[m] + arg_L[c] + citr_L[m]				Transport, mitochondrial	0	0	1000	0	2		NOTES:NCD
r2403	Mitochondrial Carrier (MC) TCDB:2.A.29.19.1	h[c] + lys_L[c] + orn[m] -> h[m] + orn[c] + lys_L[m]				Transport, mitochondrial	0	0	1000	0	4		NOTES:Human Y/N: Y	PMID:16643857,PMID:17049878
r2405	Mitochondrial Carrier (MC) TCDB:2.A.29.19.1	h[c] + orn[m] + his_L[c] -> h[m] + orn[c] + his_L[m]				Transport, mitochondrial	0	0	1000	0	2		NOTES:
r2406	Mitochondrial Carrier (MC) TCDB:2.A.29.19.1	h[c] + lys_L[c] + his_L[m] -> h[m] + lys_L[m] + his_L[c]				Transport, mitochondrial	0	0	1000	0	4		NOTES:IT	PMID:11375437,PMID:14770311
r2407	Mitochondrial Carrier (MC) TCDB:2.A.29.19.1	h[c] + arg_L[c] + his_L[m] -> h[m] + arg_L[m] + his_L[c]				Transport, mitochondrial	0	0	1000	0	0		NOTES:unknown mechanism see Verhoeven 11591435 and clayton 11356171 - added for peroxisomal oxidation of fatty acids NJ
r2409	Mitochondrial Carrier (MC) TCDB:2.A.29.19.1	h[c] + citr_L[c] + his_L[m] -> h[m] + citr_L[m] + his_L[c]				Transport, mitochondrial	0	0	1000	0	4		NOTES:NCD,IT
r2410	Mitochondrial Carrier (MC) TCDB:2.A.29.19.1	h[c] + lys_L[c] + citr_L[m] -> h[m] + lys_L[m] + citr_L[c]				Transport, mitochondrial	0	0	1000	0	2		NOTES:diffusion NJ
r2412	Mitochondrial Carrier (MC) TCDB:2.A.29.19.1	h[c] + orn[c] + citr_L[m] -> h[m] + orn[m] + citr_L[c]				Transport, mitochondrial	0	0	1000	0	2		NOTES:IT
r2413	Mitochondrial Carrier (MC) TCDB:2.A.29.19.1	h[c] + citr_L[m] + his_L[c] -> h[m] + citr_L[c] + his_L[m]				Transport, mitochondrial	0	0	1000	0	4		NOTES:IT	PMID:10777604
r2416	Mitochondrial Carrier (MC) TCDB:2.A.29.19.1	h[c] + his_L[m] -> h[m] + his_L[c]				Transport, mitochondrial	0	0	1000	0	2		NOTES:IT	PMID:10777604
r2425	Mitochondrial Carrier (MC) TCDB:2.A.29.16.1	3 h[m] + adp[m] + dgdp[c] -> adp[c] + dgdp[m]				Transport, mitochondrial	0	0	1000	0	1		NOTES:IT	PMID:10777604
r2433	Mitochondrial Carrier (MC) TCDB:2.A.29.8.3	acrn[c] + crn[m] -> acrn[m] + crn[c]				Transport, mitochondrial	0	0	1000	0	1		NOTES:IT	PMID:10777604
r2435	Mitochondrial Carrier (MC) TCDB:2.A.29.8.3	crn[m] + pmtcrn[c] -> crn[c] + pmtcrn[m]				Transport, mitochondrial	0	0	1000	0	2		NOTES:IT	PMID:10777604
r2437	Mitochondrial Carrier (MC) TCDB:2.A.29.8.3	crn[m] + HC02149[c] -> crn[c] + HC02149[m]				Transport, mitochondrial	0	0	1000	0	4		NOTES:IT	PMID:10777604
r2439	Zinc (Zn2+)-Iron (Fe2+) Permease (ZIP), TCDB:2.A.53.2.2	hco3[c] + so4[e] -> hco3[e] + so4[c]				Transport, extracellular	0	0	1000	0	4		NOTES:IT	PMID:10777604
r2499	ATP-binding Cassette (ABC) TCDB:3.A.1.203.3	h2o[c] + atp[c] + ppcoa[c] -> adp[c] + h[c] + pi[c] + ppcoa[x]				Transport, peroxisomal	0	0	1000	0	4		NOTES:IT	PMID:10777604
r2501	ATP-binding Cassette (ABC) TCDB:3.A.1.203.3	h2o[c] + atp[c] + cholcoa[c] -> adp[c] + h[c] + pi[c] + cholcoa[x]				Transport, peroxisomal	0	0	1000	0	4		NOTES:IT	PMID:10777604
r2503	ATP-binding Cassette (ABC) TCDB:3.A.1.203.3	h2o[c] + atp[c] + arachdcoa[c] -> adp[c] + h[c] + pi[c] + arachdcoa[x]				Transport, peroxisomal	0	0	1000	0	4		NOTES:IT	PMID:10777604
r2511	Utilized transport	crn[r] + lnlc[c] <=> crn[c] + lnlc[r]				Transport, endoplasmic reticular	1	-1000	1000	0	4		NOTES:IT	PMID:10777604
r2512	Utilized transport	crn[c] + lnlncg[r] -> crn[r] + lnlncg[c]				Transport, endoplasmic reticular	0	0	1000	0	4		NOTES:IT	PMID:10777604
r2513	Utilized transport	crn[c] + lnlnca[r] -> crn[r] + lnlnca[c]				Transport, endoplasmic reticular	0	0	1000	0	4		NOTES:IT	PMID:10777604
r2515	Utilized transport	crn[c] + HC02100[r] -> crn[r] + dlnlcg[c]				Transport, endoplasmic reticular	0	0	1000	0	4		NOTES:IT	PMID:10777604
r2520	Mitochondrial Carrier (MC) TCDB:2.A.29.2.1	akg[m] + gthrd[c] <=> akg[c] + gthrd[m]				Transport, mitochondrial	1	-1000	1000	0	4		NOTES:IT	PMID:10777604
r2537	Utilized transport	lnlncgcoa[c] <=> lnlncgcoa[r]				Transport, endoplasmic reticular	1	-1000	1000	0	4		NOTES:IT	PMID:10777604
RE0344C	RE0344	h2o[c] + stcoa[c] <=> h[c] + coa[c] + ocdca[c]	(641372.1) or (641371.1) or (570.1)	570.1 641371.1 641372.1		Fatty acid synthesis	1	-1000	1000	0	4		NOTES:IT	PMID:10777604
RE0383C	RE0383	nadp[c] + guln[c] <=> h[c] + nadph[c] + glcur[c]	-10327.1	10327.1		Miscellaneous	1	-1000	1000	0	4		NOTES:IT	PMID:10777604
RE0577C	RE0577	h2o[c] + arachcoa[c] <=> h[c] + coa[c] + arach[c]	(641372.1) or (641371.1) or (570.1)	570.1 641371.1 641372.1		Fatty acid synthesis	1	-1000	1000	0	4		NOTES:cholesterol precursor, transport by &quot;diffusion&quot; -&gt; actually beleived to be flip-flop mechanism (PMID: 12840657). See also Krisans (PMID: 14713247, PMID: 12121718) for synthesis of cholesterol pathway (why FRDP needs to be transported between ER and peroxisome) NJ	PMID:12840657
RE0583C	RE0583	h[c] + nadph[c] + od2coa[c] <=> nadp[c] + stcoa[c]				Fatty acid synthesis	1	-1000	1000	0	4		NOTES:cholesterol precursor, transport by &quot;diffusion&quot; -&gt; actually beleived to be flip-flop mechanism (PMID: 12840657). See also Krisans (PMID: 14713247, PMID: 12121718) for synthesis of cholesterol pathway (why FRDP needs to be transported between ER and peroxisome) NJ	PMID:12121718,PMID:12840657,PMID:14713247
RE0691C	RE0691	4abutn[c] <=> h2o[c] + CE1944[c]				Urea cycle	1	-1000	1000	0	4		NOTES:Human Y/N: Y	PMID:17477828,PMID:17477829
RE0830C	RE0830	thbpt4acam[c] <=> h2o[c] + CE2705[c]				Tetrahydrobiopterin metabolism	1	-1000	1000	0	4		NOTES:NCD	PMID:10821868,PMID:10860996,PMID:11583593,PMID:11780753,PMID:11882499,PMID:12135767,PMID:12750891,PMID:15033637,PMID:1634504,PMID:1695905,PMID:1701966,PMID:2182619,PMID:3399500,PMID:8419132,PMID:9770484
RE0830N	RE0830	thbpt4acam[n] <=> h2o[n] + CE2705[n]	(5092.1) or (84105.1)	5092.1 84105.1		Tetrahydrobiopterin metabolism	1	-1000	1000	0	4		NOTES:NCD	PMID:12748858,PMID:15607332
RE1303C	RE1303	o2[c] + h[c] + nadph[c] + vitd3[c] -> h2o[c] + 25hvitd3[c] + nadp[c]				Vitamin D metabolism	0	0	1000	0	2		NOTES:EC 2.5.1.- NCD
RE1342C	RE1342	nad[c] + sbt_D[c] <=> h[c] + nadh[c] + glc_D[c]				Fructose and mannose metabolism	1	-1000	1000	0	2		NOTES:IT	PMID:14697341
RE1447N	RE1447	h2o[n] + pail45p_hs[n] <=> pi[n] + pail5p_hs[n]				Phosphatidylinositol phosphate metabolism	1	-1000	1000	0	2		NOTES:NCD	PMID:12764149
RE1448N	RE1448	h2o[n] + pail5p_hs[n] <=> pail_hs[n] + pi[n]				Phosphatidylinositol phosphate metabolism	1	-1000	1000	0	4		NOTES:IT	PMID:2733692
RE1709C	RE1709	thbpt4acam[c] <=> h2o[c] + CE5236[c]				Tetrahydrobiopterin metabolism	1	-1000	1000	0	4		NOTES:
RE1709N	RE1709	thbpt4acam[n] <=> h2o[n] + CE5236[n]	(5092.1) or (84105.1)	5092.1 84105.1		Tetrahydrobiopterin metabolism	1	-1000	1000	0	0		NOTES:NCD	PMID:12937168
RE1860E	RE1860	h2o[e] + 23cump[e] <=> h[e] + 3ump[e]	-1267.1	1267.1		Miscellaneous	1	-1000	1000	0	4		NOTES:unknown mechanism, however these blood groups need to make it to the extracellular surface of cells NJ
RE1897C	RE1897	nad[c] + spmd[c] <=> h[c] + nadh[c] + CE5586[c]				Urea cycle	1	-1000	1000	0	4		NOTES:unknown mechanism, however these blood groups need to make it to the extracellular surface of cells NJ
RE1898C	RE1898	CE5586[c] <=> 13dampp[c] + CE1944[c]				Urea cycle	1	-1000	1000	0	4		NOTES:unknown mechanism, however these blood groups need to make it to the extracellular surface of cells NJ
RE1901R	RE1901	h2o[r] + nad[r] + retinal_cis_9[r] <=> 2 h[r] + nadh[r] + CE1617[r]				Vitamin A metabolism	1	-1000	1000	0	4		NOTES:unknown mechanism, however these blood groups need to make it to the extracellular surface of cells NJ
RE1903R	RE1903	h2o[r] + nad[r] + retinal_cis_13[r] -> 2 h[r] + nadh[r] + 13_cis_retn[r]				Vitamin A metabolism	0	0	1000	0	4		NOTES:unknown mechanism, however these blood groups need to make it to the extracellular surface of cells NJ
RE2069C	RE2069	prostge2[c] <=> h2o[c] + HC02205[c]				Eicosanoid metabolism	1	-1000	1000	0	2		NOTES:unknown mechanism, however these blood groups need to make it to the extracellular surface of cells NJ
RE2079R	RE2079	prostgd2[r] <=> h2o[r] + C05957[r]				Eicosanoid metabolism	1	-1000	1000	0	2		NOTES:unknown mechanism, however these blood groups need to make it to the extracellular surface of cells NJ
RE2240C	RE2240	o2[c] + h[c] + 25hvitd3[c] + nadph[c] -> h2o[c] + 2425dhvitd3[c] + nadp[c]				Vitamin D metabolism	0	0	1000	0	2		NOTES:unknown mechanism, however these blood groups need to make it to the extracellular surface of cells NJ
RE2651R	RE2651	retinal[r] <=> retinal_cis_9[r]				Vitamin A metabolism	1	-1000	1000	0	2		NOTES:unknown mechanism, however these blood groups need to make it to the extracellular surface of cells NJ
RE2655R	RE2655	retinal[r] <=> retinal_cis_13[r]				Vitamin A metabolism	1	-1000	1000	0	2		NOTES:unknown mechanism, however these blood groups need to make it to the extracellular surface of cells NJ
RE2658R	RE2658	retn[r] <=> CE1617[r]				Vitamin A metabolism	1	-1000	1000	0	2		NOTES:NCD	PMID:10460218,PMID:11389735,PMID:12604617,PMID:2317201
RE2659R	RE2659	retn[r] <=> 13_cis_retn[r]				Vitamin A metabolism	1	-1000	1000	0	2		NOTES:NCD	PMID:11870229,PMID:1769200,PMID:2803312,PMID:2983333
RE2660C	RE2660	CE5236[c] <=> CE2705[c]				Tetrahydrobiopterin metabolism	1	-1000	1000	0	2		NOTES:NCD
RE2660N	RE2660	CE5236[n] <=> CE2705[n]	(5092.1) or (84105.1)	5092.1 84105.1		Tetrahydrobiopterin metabolism	1	-1000	1000	0	2		NOTES:NCD
RE2666C	RE2666	udpgal[c] + galside_hs[c] -> h[c] + udp[c] + digalside_hs[c]				Glycosphingolipid metabolism	0	0	1000	0	2		NOTES:unknown mechanism, however these blood groups need to make it to the extracellular surface of cells NJ
RE2675C	RE2675	o2[c] + h[c] + nadh[c] + dhcrm_hs[c] -> 2 h2o[c] + nad[c] + crm_hs[c]	-8560.1	8560.1		Sphingolipid metabolism	0	0	1000	0	4		NOTES:unknown mechanism, however these blood groups need to make it to the extracellular surface of cells NJ
RE2677E	RE2677	udpgal[e] + crm_hs[e] -> h[e] + udp[e] + galside_hs[e]				Glycosphingolipid metabolism	0	0	1000	0	4		NOTES:unknown mechanism, however these blood groups need to make it to the extracellular surface of cells NJ
RE2799C	RE2799	nadp[c] + prostgf2[c] <=> h[c] + nadph[c] + prostgh2[c]				Eicosanoid metabolism	1	-1000	1000	0	0		NOTES:unknown mechanism, however these blood groups need to make it to the extracellular surface of cells NJ
RE2973C	RE2973	atp[c] + pail5p_hs[c] <=> adp[c] + h[c] + CE5132[c]	(5290.1) or (5291.1) or (5294.1) or (5289.1) or (5286.1) or (5287.1) or (5288.1)	5286.1 5287.1 5288.1 5289.1 5290.1 5291.1 5294.1		Phosphatidylinositol phosphate metabolism	1	-1000	1000	0	0		NOTES:unknown mechanism, however these blood groups need to make it to the extracellular surface of cells NJ
RE2973N	RE2973	atp[n] + pail5p_hs[n] <=> h[n] + adp[n] + CE5132[n]	(5286.1) or (5287.1) or (5288.1)	5286.1 5287.1 5288.1		Phosphatidylinositol phosphate metabolism	1	-1000	1000	0	2		NOTES:unknown mechanism, however these blood groups need to make it to the extracellular surface of cells NJ
RE2974C	RE2974	atp[c] + pail3p_hs[c] -> adp[c] + h[c] + CE5132[c]	(8395.1) or (23396.1) or (5305.1) or (8396.1) or (79837.1) or (8394.1)	23396.1 5305.1 79837.1 8394.1 8395.1 8396.1		Phosphatidylinositol phosphate metabolism	0	0	1000	0	2		NOTES:unknown mechanism, however these blood groups need to make it to the extracellular surface of cells NJ
RE2974N	RE2974	atp[n] + pail3p_hs[n] <=> h[n] + adp[n] + CE5132[n]				Phosphatidylinositol phosphate metabolism	1	-1000	1000	0	2		NOTES:unknown mechanism, however these blood groups need to make it to the extracellular surface of cells NJ
RE3009C	RE3009	paps[c] + trdrd[c] -> 2 h[c] + pap[c] + so3[c] + trdox[c]				Methionine and cysteine metabolism	0	0	1000	0	2		NOTES:unknown mechanism, however these blood groups need to make it to the extracellular surface of cells NJ
RE3050R	RE3050	h2o[r] + nad[r] + retinal_cis_13[r] <=> 2 h[r] + nadh[r] + retn[r]				Vitamin A metabolism	1	-1000	1000	0	2		NOTES:unknown mechanism, however these blood groups need to make it to the extracellular surface of cells NJ
RE3241C	RE3241	h[c] + malcoa[c] + HC10852[c] -> co2[c] + coa[c] + CE5160[c]				Fatty acid synthesis	0	0	1000	0	2		NOTES:unknown mechanism, however these blood groups need to make it to the extracellular surface of cells NJ
RE3242C	RE3242	h[c] + nadph[c] + CE5160[c] <=> nadp[c] + CE5161[c]				Fatty acid synthesis	1	-1000	1000	0	2		NOTES:unknown mechanism, however these blood groups need to make it to the extracellular surface of cells NJ
RE3243C	RE3243	CE5161[c] <=> h2o[c] + CE5162[c]				Fatty acid synthesis	1	-1000	1000	0	2		NOTES:unknown mechanism, however these blood groups need to make it to the extracellular surface of cells NJ
RE3244C	RE3244	h[c] + nadph[c] + CE5162[c] <=> nadp[c] + odecoa[c]				Fatty acid synthesis	1	-1000	1000	0	2		NOTES:unknown mechanism, however these blood groups need to make it to the extracellular surface of cells NJ
RE3245C	RE3245	h2o[c] + odecoa[c] <=> h[c] + coa[c] + ocdcea[c]				Fatty acid synthesis	1	-1000	1000	0	2		NOTES:unknown mechanism for transport - intracellular transport occurs, most details are unknown - see for example Varki glycobiology text or numerous reviews (PMID: 8206147) - extracellular transport is also made available since metabolites can get to outer plasma membrane NJ	PMID:8206147
RE3269C	RE3269	h2o[c] + pail35p_hs[c] <=> pi[c] + pail5p_hs[c]	(8897.1) or (8897.3) or (8897.2)	8897.1 8897.2 8897.3		Phosphatidylinositol phosphate metabolism	1	-1000	1000	0	2		NOTES:unknown mechanism for transport - intracellular transport occurs, most details are unknown - see for example Varki glycobiology text or numerous reviews (PMID: 8206147) NJ	PMID:8206147
RE3270C	RE3270	h2o[c] + pail3p_hs[c] <=> pi[c] + pail_hs[c]				Phosphatidylinositol phosphate metabolism	1	-1000	1000	0	2		NOTES:	PMID:1751541,PMID:8993166
RE3272N	RE3272	h2o[n] + pail4p_hs[n] <=> pail_hs[n] + pi[n]				Phosphatidylinositol phosphate metabolism	1	-1000	1000	0	2		NOTES:
RE3273C	RE3273	h2o[c] + pail_hs[c] <=> h[c] + pa_hs[c] + inost[c]	-5338.1	5338.1		Phosphatidylinositol phosphate metabolism	1	-1000	1000	0	2		NOTES:NCD
RE3301C	RE3301	h2o[c] + ps_hs[c] <=> h[c] + pa_hs[c] + ser_L[c]	-5338.1	5338.1		Glycerophospholipid metabolism	1	-1000	1000	0	1		NOTES:IF. Biochemical	PMID:16774737,PMID:17111171,PMID:17111172
RE3347C	RE3347	h[c] + nadh[c] + fad[c] <=> nad[c] + fadh2[c]				Vitamin B2 metabolism	1	-1000	1000	0	1		NOTES:MM	PMID:14598172,PMID:4441366
RE3421R	RE3421	C05957[r] <=> CE4876[r]				Eicosanoid metabolism	1	-1000	1000	0	2		NOTES:MM	PMID:14598172,PMID:4441366
RE3520E	RE3520	C05965[e] <=> C04849[e]	(2880.1) or (257202.1) or (2882.1) or (2878.1)	257202.1 2878.1 2880.1 2882.1		Arachidonic acid metabolism	1	-1000	1000	0	0		NOTES:TDV	PMID:14598172,PMID:3587497
RE3524R	RE3524	prostgd2[r] <=> h2o[r] + CE4876[r]				Eicosanoid metabolism	1	-1000	1000	0	4		NOTES:MM	PMID:14598172,PMID:4441366
RE3556C	RE3556	HC02202[c] <=> HC02206[c]				Eicosanoid metabolism	1	-1000	1000	0	0		NOTES:NJ
RE3565C	RE3565	HC02206[c] <=> HC02204[c]				Eicosanoid metabolism	1	-1000	1000	0	4		NOTES:NJ	PMID:2118655
RE3566C	RE3566	HC02203[c] <=> HC02207[c]				Eicosanoid metabolism	1	-1000	1000	0	4		NOTES:NJ	PMID:2118655
RE3567C	RE3567	HC02207[c] <=> HC02205[c]				Eicosanoid metabolism	1	-1000	1000	0	4		NOTES:NJ	PMID:2118655
RE3568C	RE3568	prostge1[c] <=> h2o[c] + HC02202[c]				Eicosanoid metabolism	1	-1000	1000	0	4		NOTES:NJ	PMID:2118655
RE3629C	RE3629	accoa[c] + CE2089[c] -> h[c] + coa[c] + CE2088[c]				Histidine metabolism	0	0	1000	0	4		NOTES:NJ	PMID:2118655
RE3630C	RE3630	h2o[c] + CE2088[c] <=> ac[c] + CE2089[c]				Histidine metabolism	1	-1000	1000	0	4		NOTES:NJ	PMID:2118655
HCO3_NAt	bicarbonate transport (Na/HCO3 cotransport)	hco3[e] + na1[e] <=> hco3[c] + na1[c]	-9497.1	9497.1		Transport, extracellular	1	-1000	1000	0	4		NOTES:NJ	PMID:12424536,PMID:12493760,PMID:1977660
PIt8	phosphate transport in/out via Na+ symporter	1.5 na1[e] + pi[e] <=> pi[c] + 1.5 na1[c]	(6574.1) or (6575.1)	6574.1 6575.1		Transport, extracellular	1	-1000	1000	0	4		NOTES:NJ	PMID:12424536,PMID:12493760,PMID:1977660
biomass_reaction	Generic human biomass reaction	20.6508 h2o[c] + 20.7045 atp[c] + 0.38587 glu_L[c] + 0.35261 asp_L[c] + 0.036117 gtp[c] + 0.27942 asn_L[c] + 0.50563 ala_L[c] + 0.046571 cys_L[c] + 0.326 gln_L[c] + 0.53889 gly[c] + 0.39253 ser_L[c] + 0.31269 thr_L[c] + 0.59211 lys_L[c] + 0.35926 arg_L[c] + 0.15302 met_L[c] + 0.023315 pail_hs[c] + 0.039036 ctp[c] + 0.15446 pchol_hs[c] + 0.055374 pe_hs[c] + 0.020401 chsterol[c] + 0.002914 pglyc_hs…				Exchange/demand reaction	0	0	1000	1	4		NOTES:NJ	PMID:12424536,PMID:12493760,PMID:1977660
2MB2COAc	transport of 2-methylcrotonoyl-CoA into cytosol	2mb2coa[m] <=> 2mb2coa[c]				Exchange	1	-1000	1000	0	4		NOTES:NJ	PMID:12424536,PMID:12493760,PMID:1977660
3HBCOARc	transport of (R)-3-hydroxybutanoyl-CoA into cytosol	3hbcoa_R[m] <=> 3hbcoa_R[c]				Exchange	1	-1000	1000	0	4		NOTES:NJ	PMID:12424536,PMID:12493760,PMID:1977660
ADPACDAc	activation of adipic acid for formation of adipoyl carnitine	atp[c] + coa[c] + adpac[c] -> amp[c] + ppi[c] + adpcoa[c]				Exchange	0	0	1000	0	4		NOTES:NJ	PMID:10386598
ADPACTD	transport into cytosol (diffusion)	adpac[x] <=> adpac[c]				Exchange	1	-1000	1000	0	4		NOTES:NJ	PMID:10386598
ADPCOACROT	production of adipoyl carnitine	crn[x] + adpcoa[x] <=> coa[x] + c6dc[x]				Exchange	1	-1000	1000	0	4		NOTES:NJ	PMID:10386598
ADPCOAPTE	thioesterification of adipoyl coA for release into cytosol	h2o[x] + adpcoa[x] -> h[x] + coa[x] + adpac[x]				Exchange	0	0	1000	0	4		NOTES:NJ	PMID:10386598
BCRNe	transport of 3-hydroxy butyryl carnitine into extra cellular space	3bcrn[c] -> 3bcrn[e]				Exchange	0	0	1000	0	4		NOTES:NJ	PMID:10386598
C100CPT1	production of decanoylcarnitine	crn[c] + dcacoa[c] <=> coa[c] + c10crn[c]				Exchange	1	-1000	1000	0	4		NOTES:NJ	PMID:10386598
sink_c101coa(c)	C101COASINK	c101coa[c] <=>				Fatty acid oxidation	1	-1000	1000	0	4		NOTES:NJ	PMID:10386598
C101CPT1	production of decenoylcarnitine	crn[c] + c101coa[c] <=> coa[c] + c101crn[c]				Exchange	1	-1000	1000	0	4		NOTES:NJ	PMID:10386598
C101CRNe	transport of decenoyl carnitine into extra cellular space	c101crn[c] -> c101crn[e]				Exchange	0	0	1000	0	4		NOTES:NJ	PMID:10386598
C102CPT1	production of decadienoylcarnitine	crn[c] + decdicoa[c] <=> coa[c] + decdicrn[c]				Exchange	1	-1000	1000	0	4		NOTES:NJ	PMID:10386598
C10CRNe	transport of decanoyl carnitine into extra cellular space	c10crn[c] -> c10crn[e]				Exchange	0	0	1000	0	4		NOTES:NJ	PMID:10386598
C10DCCACT	transport of sebacoyl carnitine into cytosol	c10dc[x] <=> c10dc[c]				Exchange	1	-1000	1000	0	4		NOTES:
C10DCc	production of sebacoylcarnitine	crn[c] + sebcoa[c] <=> coa[c] + c10dc[c]				Exchange	1	-1000	1000	0	4		NOTES:
C10DCe	transport of sebacoyl carnitine into extra cellular space	c10dc[c] -> c10dc[e]				Exchange	0	0	1000	0	4		NOTES:
C10OHc	production of 3-OHdecanoylcarnitinec	crn[c] + 3hdcoa[c] <=> coa[c] + 3deccrn[c]				Exchange	1	-1000	1000	0	4		NOTES:
C120CPT1	production of dodecanoylcarnitine	crn[c] + ddcacoa[c] <=> coa[c] + ddeccrn[c]				Exchange	1	-1000	1000	0	4		NOTES:NCD
C121CPT1	production of dodecenoylcarnitine	crn[c] + dd2coa[c] <=> coa[c] + ddece1crn[c]				Exchange	1	-1000	1000	0	0		NOTES:NCD
C12DCACOT	thioesterification of dodecanedioyl coa for release into cytosol	h2o[x] + c12dccoa[x] -> h[x] + coa[x] + dodecanac[x]				Exchange	0	0	1000	0	0		NOTES:Keratan sulfate I biosynthesis NCD	PMID:12512857,PMID:1903938,PMID:3094506,PMID:3144273,PMID:9405390,PMID:9435216
C12DCACT	activation of Dodecanedioic acid	atp[c] + coa[c] + dodecanac[c] -> amp[c] + ppi[c] + c12dccoa[c]				Exchange	0	0	1000	0	0		NOTES:Keratan sulfate I biosynthesis NCD	PMID:12512857,PMID:1903938,PMID:3094506,PMID:3144273,PMID:9405390,PMID:9435216
C12DCTD	transport of Dodecanedioic acid by diffusion	dodecanac[x] <=> dodecanac[c]				Exchange	1	-1000	1000	0	0		NOTES:Keratan sulfate I biosynthesis NCD	PMID:12512857,PMID:1903938,PMID:3094506,PMID:3144273,PMID:9405390,PMID:9435216
C12DCe	excretion of C12DC	c12dc[c] -> c12dc[e]				Exchange	0	0	1000	0	0		NOTES:Keratan sulfate I biosynthesis NCD	PMID:12512857,PMID:1903938,PMID:3094506,PMID:3144273,PMID:9405390,PMID:9435216
C12OHc	production of 3-OHdodecanoylcarnitinec	crn[c] + 3hddcoa[c] <=> coa[c] + 3ddcrn[c]				Exchange	1	-1000	1000	0	0		NOTES:Keratan sulfate I biosynthesis NCD	PMID:12512857,PMID:1903938,PMID:3094506,PMID:3144273,PMID:9405390,PMID:9435216
C140CPT1	production of myristoylcarnitine	crn[c] + tdcoa[c] <=> coa[c] + tdcrn[c]				Exchange	1	-1000	1000	0	4		NOTES:Keratan sulfate I biosynthesis NCD	PMID:12512857,PMID:1903938,PMID:3094506,PMID:3144273,PMID:9405390,PMID:9435216
C141ACBP	transport of 3-hydroxytetradecenoyl coa from mitochondria into cytosol	3tetd7ecoa[m] <=> 3tetd7ecoa[c]				Exchange	1	-1000	1000	0	4		NOTES:Keratan sulfate I biosynthesis NCD	PMID:12512857,PMID:1903938,PMID:3094506,PMID:3144273,PMID:9405390,PMID:9435216
C141CPT1	production of tetradecenoylcarnitine	crn[c] + tetdece1coa[c] <=> coa[c] + tetdece1crn[c]				Exchange	1	-1000	1000	0	4		NOTES:Keratan sulfate I biosynthesis NCD	PMID:12512857,PMID:1903938,PMID:3094506,PMID:3144273,PMID:9405390,PMID:9435216
C141OHc	production of 3-hydroxytetradecenoyl carnitine	crn[c] + 3tetd7ecoa[c] <=> coa[c] + 3tetd7ecoacrn[c]				Exchange	1	-1000	1000	0	4		NOTES:Keratan sulfate II biosynthesis NCD	PMID:10747980,PMID:12512857,PMID:1903938,PMID:3094506,PMID:3144273,PMID:9405390,PMID:9435216
C141OHe	excretion of C14:1-OH	3tetd7ecoacrn[c] -> 3tetd7ecoacrn[e]				Exchange	0	0	1000	0	4		NOTES:Keratan sulfate II biosynthesis NCD	PMID:10747980,PMID:12512857,PMID:1903938,PMID:3094506,PMID:3144273,PMID:9405390,PMID:9435216
C142CPT1	production of tetradecadienoylcarnitine	crn[c] + tetdec2coa[c] <=> coa[c] + tetdec2crn[c]				Exchange	1	-1000	1000	0	4		NOTES:Keratan sulfate II biosynthesis NCD	PMID:10747980,PMID:12512857,PMID:1903938,PMID:3094506,PMID:3144273,PMID:9405390,PMID:9435216
C14OHc	production of 3-hydroxytetradecanoylcarnitine	crn[c] + 3htdcoa[c] <=> coa[c] + 3tdcrn[c]				Exchange	1	-1000	1000	0	4		NOTES:Keratan sulfate II biosynthesis NCD	PMID:10747980,PMID:12512857,PMID:3094506,PMID:3144273,PMID:9405390,PMID:9435216
C161OHc	production of 3-hydroxyhexadecenoylcarnitine	crn[c] + 3hdeccoa[c] <=> coa[c] + 3hdececrn[c]				Exchange	1	-1000	1000	0	4		NOTES:Keratan sulfate II biosynthesis NCD	PMID:12512857,PMID:1903938,PMID:3094506,PMID:3144273,PMID:9405390,PMID:9435216
C16DCc	production of hexadecanedioylcarnitine	crn[c] + hexdicoa[c] <=> coa[c] + c16dc[c]				Exchange	1	-1000	1000	0	4		NOTES:Keratan sulfate II biosynthesis NCD	PMID:12512857,PMID:1903938,PMID:3094506,PMID:3144273,PMID:9405390,PMID:9435216
C16DCe	transport of Hexadecanedioic acid mono-L-carnitine ester into extra cellular space	c16dc[c] -> c16dc[e]				Exchange	0	0	1000	0	4		NOTES:Keratan sulfate II biosynthesis NCD	PMID:12512857,PMID:1903938,PMID:3094506,PMID:3144273,PMID:9405390,PMID:9435216
C16OHc	production of 3-hydroxyhexadecanoylcarnitinec	crn[c] + 3hexdcoa[c] <=> coa[c] + 3hexdcrn[c]				Exchange	1	-1000	1000	0	4		NOTES:Keratan sulfate II biosynthesis NCD	PMID:12512857,PMID:1903938,PMID:3094506,PMID:3144273,PMID:9405390,PMID:9435216
C16txc	transport of palmitoylcoa into peroxisomes	h2o[c] + atp[c] + pmtcoa[c] -> adp[c] + h[c] + pi[c] + pmtcoa[x]				Exchange	0	0	1000	0	4		NOTES:Keratan sulfate I biosynthesis NCD	PMID:12512857,PMID:1903938,PMID:3094506,PMID:3144273,PMID:9405390,PMID:9435216
C181OHc	production of 3-hydroxyoctadecenoylcarnitinec	crn[c] + 3octdece1coa[c] <=> coa[c] + 3octdece1crn[c]				Exchange	1	-1000	1000	0	4		NOTES:Keratan sulfate I biosynthesis NCD	PMID:12512857,PMID:1903938,PMID:3094506,PMID:3144273,PMID:9405390,PMID:9435216
C30CPT1	production of propionylcarnitine	ppcoa[c] + crn[c] -> coa[c] + pcrn[c]				Exchange	0	0	1000	0	4		NOTES:Keratan sulfate I biosynthesis NCD	PMID:12512857,PMID:1903938,PMID:3094506,PMID:3144273,PMID:9405390,PMID:9435216
C3DCe	transport of malonyl carnitine into extra cellular space	c3dc[c] -> c3dc[e]				Exchange	0	0	1000	0	4		NOTES:Keratan sulfate I biosynthesis NCD	PMID:12512857,PMID:1903938,PMID:3094506,PMID:3144273,PMID:9405390,PMID:9435216
C40CPT1	production of butyrylcarnitine	crn[c] + btcoa[c] <=> coa[c] + c4crn[c]				Exchange	1	-1000	1000	0	4		NOTES:NCD	PMID:9597550
C4CRNCPT2	transport of butyryl carnitine in the mitochondrial matrix for final hydrolysis	coa[m] + c4crn[m] <=> btcoa[m] + crn[m]				Exchange	1	-1000	1000	0	4		NOTES:
C4CRNe	transport of butyryl carnitine into the extra cellular space	c4crn[c] -> c4crn[e]				Exchange	0	0	1000	0	4		NOTES:
C4DCCACT	transport of succinyl carnitine into cytosol	c4dc[x] <=> c4dc[c]				Exchange	1	-1000	1000	0	4		NOTES:NCD	PMID:11007802
C4DCe	transport of succinyl carnitine into the extra cellular space	c4dc[c] -> c4dc[e]				Exchange	0	0	1000	0	4		NOTES:NCD	PMID:11007802
C4OHc	production of 3-hydroxybytyryl carnitinec	crn[c] + 3hbcoa_R[c] <=> coa[c] + 3bcrn[c]				Exchange	1	-1000	1000	0	4		NOTES:NCD	PMID:11007802
C4tcx	transport of bytyrylcarnitine from peroxisomes	c4crn[x] <=> c4crn[c]				Exchange	1	-1000	1000	0	0		NOTES:NCD
C4tmc	transport of bytyrylcarnitine into mitochondrial matrix	c4crn[c] <=> c4crn[m]				Exchange	1	-1000	1000	0	0		NOTES:JLR
C4x	esterification of butyrylcoa to butyrylcarnitine for transport	crn[x] + btcoa[x] <=> coa[x] + c4crn[x]				Exchange	1	-1000	1000	0	0		NOTES:NCD
C50CPT1	production of isovalerylcarnitine	crn[c] + ivcoa[c] <=> coa[c] + ivcrn[c]				Exchange	1	-1000	1000	0	0		NOTES:NCD	PMID:11007802
C51CPT1	production of tiglylcarnitine	crn[c] + 2mb2coa[c] <=> coa[c] + c51crn[c]				Exchange	1	-1000	1000	0	0		NOTES:NAD-specific; see also G3PD2	PMID:11385633,PMID:7772607
C5DCe	transport of glutaryl carnitine into the extra cellular fluid	c5dc[c] -> c5dc[e]				Exchange	0	0	1000	0	0		NOTES:replaces old version which contains redundant metabolite (gly3p) NCD split compartmentation NJ	PMID:11385633,PMID:8549872
C60CPT1	production of hexanoylcarnitine	crn[c] + hxcoa[c] <=> coa[c] + c6crn[c]				Exchange	1	-1000	1000	0	2		NOTES:spontaneous reaction NCD
C6COAt	esterification of of hexanoylcoa for transport into cytosol	crn[x] + hxcoa[x] <=> coa[x] + c6crn[x]				Exchange	1	-1000	1000	0	0		NOTES:Needed in L-proline biosynthesis	PMID:10037775
C6CRNe	transport of hexanoyl carnitine into the extra cellular fluid	c6crn[c] -> c6crn[e]				Exchange	0	0	1000	0	0		NOTES:SAB m TDV: name change from G5SDm	PMID:10037775
C6CRNtcx	transport of hexanoylcarnitine into cytosol	c6crn[x] <=> c6crn[c]				Exchange	1	-1000	1000	0	4		NOTES:Previously EC 5.3.1.10	PMID:9714720
C6DCCACT	transport of adipoyl carnitine into cytosol	c6dc[x] <=> c6dc[c]				Exchange	1	-1000	1000	0	2		NOTES:tv, jp NCD	PMID:10349511,PMID:12831846,PMID:2156506
C6DCc	production of adipoylcarnitine	crn[c] + adpcoa[c] <=> coa[c] + c6dc[c]				Exchange	1	-1000	1000	0	4		NOTES:JLR - a reversible reaction that is otherwise identical to ZWF
C6DCe	transport of adipoyl carnitine into the extra cellular fluid	c6dc[c] -> c6dc[e]				Exchange	0	0	1000	0	2		NOTES:NCD	PMID:10349511,PMID:12831846,PMID:2156506
C80CPT1	production of octanoylcarnitine	crn[c] + occoa[c] <=> coa[c] + c8crn[c]				Exchange	1	-1000	1000	0	2		NOTES:NCD	PMID:10078553,PMID:11297555,PMID:12370122,PMID:12965222,PMID:13129915,PMID:15044018,PMID:8211187,PMID:8407995,PMID:9497333
sink_c81coa(c)	C81COASINK	c81coa[c] <=>				Fatty acid oxidation	1	-1000	1000	0	4		NOTES:NCD	PMID:11032333,PMID:11140953,PMID:11879177,PMID:9428641
C81CPT1	production of ocetenoylcarnitine	crn[c] + c81coa[c] <=> coa[c] + c81crn[c]				Exchange	1	-1000	1000	0	4		NOTES:SAB This reaction represents the ATP driven secretion of glu from the cell. It leaves out the vesicle because a compartment is not available for that. ATP demand is not known for sure stoichiometrically, but 1:1 H coupling ratio is assumed, which could translate to 3 GABA/ATP.	PMID:12750892,PMID:15383652
C81CRNe	transport of octenoyl carnitine into the extra cellular space	c81crn[c] -> c81crn[e]				Exchange	0	0	1000	0	0		NOTES:SAB c	PMID:2001229
C8CRNe	transport of octanoyl carnitine into the extra cellular space	c8crn[c] -> c8crn[e]				Exchange	0	0	1000	0	4		NOTES:NCD	PMID:14517336
C8DCc	production of suberylcarnitine	crn[c] + sbcoa[c] <=> coa[c] + c8dc[c]				Exchange	1	-1000	1000	0	4		NOTES:NJ	PMID:9030544
C8DCe	transport of suberyl carnitine into the extra cellular space	c8dc[c] -> c8dc[e]				Exchange	0	0	1000	0	4		NOTES:NJ	PMID:9030544
C9BRxtc	transport of dimethylnonanoylcarnitine from peroxisomes to cytosol	dmnoncrn[x] <=> dmnoncrn[c]				Exchange	1	-1000	1000	0	4		NOTES:unknown mechanism for transport - intracellular transport occurs, most details are unknown - see for example Varki glycobiology text or numerous reviews (PMID: 8206147) - extracellular transport is also made available since metabolites can get to outer plasma membrane NJ
DCATDc	transport of Decanoate (n-C10:0) into the cell by diffusion	dca[e] <=> dca[c]				Exchange	1	-1000	1000	0	4		NOTES:unknown mechanism for transport - intracellular transport occurs, most details are unknown - see for example Varki glycobiology text or numerous reviews (PMID: 8206147) NJ	PMID:8206147
DCATDr	transport of Decanoate (n-C10:0) into the E.R. by diffusion	dca[c] <=> dca[r]				Exchange	1	-1000	1000	0	0		NOTES:NCD	PMID:11550799,PMID:1755850,PMID:1794986,PMID:1953646,PMID:2111707,PMID:3143362,PMID:39554,PMID:7213753,PMID:7575473,PMID:8985184,PMID:9020182,PMID:9054950
DCSPTN1COAtxc	transport of docosapentenoylcoa into peroxisomes.	h2o[c] + atp[c] + dcsptn1coa[c] -> adp[c] + h[c] + pi[c] + dcsptn1coa[x]				Exchange	0	0	1000	0	4		NOTES:NCD	PMID:11550799,PMID:1755850,PMID:1794986,PMID:1953646,PMID:2111707,PMID:3143362,PMID:39554,PMID:7213753,PMID:7575473,PMID:8985184,PMID:9020182,PMID:9054950
sink_dd2coa(c)	DD2COASINK	dd2coa[c] <=>				Fatty acid oxidation	1	-1000	1000	0	4		NOTES:NCD	PMID:11550799,PMID:1755850,PMID:1794986,PMID:1953646,PMID:2111707,PMID:3143362,PMID:39554,PMID:7213753,PMID:7575473,PMID:8985184,PMID:9020182,PMID:9054950
DDCRNe	transport of 3-hydroxydodecanoyl carnitine into extra cellular space	3ddcrn[c] -> 3ddcrn[e]				Exchange	0	0	1000	0	1		NOTES:NCD	PMID:11550799,PMID:1755850,PMID:1794986,PMID:1953646,PMID:2111707,PMID:3143362,PMID:39554,PMID:7213753,PMID:7575473,PMID:8985184,PMID:9020182,PMID:9054950
DDECCRNe	transport of lauroyl carnitine into extra cellular space	ddeccrn[c] -> ddeccrn[e]				Exchange	0	0	1000	0	1		NOTES:NCD	PMID:11550799,PMID:1755850,PMID:1794986,PMID:1953646,PMID:2111707,PMID:3143362,PMID:39554,PMID:7213753,PMID:7575473,PMID:8985184,PMID:9020182,PMID:9054950
DDECE1CRNe	transport of dodecenoyl carnitine into extra cellular space	ddece1crn[c] -> ddece1crn[e]				Exchange	0	0	1000	0	4		NOTES:NCD	PMID:11550799,PMID:1755850,PMID:1794986,PMID:1953646,PMID:2111707,PMID:3143362,PMID:39554,PMID:7213753,PMID:7575473,PMID:8985184,PMID:9020182,PMID:9054950
DECCRNe	transport of 3-hydroxydecanoyl carnitine into extra cellular space	3deccrn[c] -> 3deccrn[e]				Exchange	0	0	1000	0	4		NOTES:NCD	PMID:11550799,PMID:1755850,PMID:1794986,PMID:1953646,PMID:2111707,PMID:3143362,PMID:39554,PMID:7213753,PMID:7575473,PMID:8985184,PMID:9020182,PMID:9054950
sink_decdicoa(c)	Sink for 2,6-dodecadienoylcoa(c)	decdicoa[c] <=>				Fatty acid oxidation	1	-1000	1000	0	4		NOTES:NCD	PMID:11550799,PMID:1755850,PMID:1794986,PMID:1953646,PMID:2111707,PMID:3143362,PMID:39554,PMID:7213753,PMID:7575473,PMID:8985184,PMID:9020182,PMID:9054950
DECDICRNe	trnasport of decadienoyl carnitine into the extra cellular space	decdicrn[c] -> decdicrn[e]				Exchange	0	0	1000	0	4		NOTES:NCD	PMID:11550799,PMID:1755850,PMID:1794986,PMID:1953646,PMID:2111707,PMID:3143362,PMID:39554,PMID:7213753,PMID:7575473,PMID:8985184,PMID:9020182,PMID:9054950
DOCO13ECOAtxc	transport of 13-docosenoylcoa into peroxisomes	h2o[c] + atp[c] + doco13ecoa[c] -> adp[c] + h[c] + pi[c] + doco13ecoa[x]				Exchange	0	0	1000	0	4		NOTES:NCD	PMID:11550799,PMID:1755850,PMID:1794986,PMID:1953646,PMID:2111707,PMID:3143362,PMID:39554,PMID:7213753,PMID:7575473,PMID:8985184,PMID:9020182,PMID:9054950
DOCO13EFATP	absorption or uptake of 13-docosenoic acid into cells	atp[c] + coa[c] + doco13ac[e] -> amp[c] + ppi[c] + doco13ecoa[c]				Exchange	0	0	1000	0	4		NOTES:NCD	PMID:11550799,PMID:1755850,PMID:1794986,PMID:1953646,PMID:2111707,PMID:3143362,PMID:39554,PMID:7213753,PMID:7575473,PMID:8985184,PMID:9020182,PMID:9054950
DOCOSACTDe	uptake of docosanoic acid by cells by diffusion	docosac[e] <=> docosac[c]				Exchange	1	-1000	1000	0	4		NOTES:NCD	PMID:11550799,PMID:1755850,PMID:1794986,PMID:1953646,PMID:2111707,PMID:3143362,PMID:39554,PMID:7213753,PMID:7575473,PMID:8985184,PMID:9020182,PMID:9054950
DOCOSACTDr	transport of docosanoic acid by diffusion	docosac[c] <=> docosac[r]				Exchange	1	-1000	1000	0	4		NOTES:NCD	PMID:11550799,PMID:1755850,PMID:1794986,PMID:1953646,PMID:2111707,PMID:3143362,PMID:39554,PMID:7213753,PMID:7575473,PMID:8985184,PMID:9020182,PMID:9054950
DOCOSADIACTD	transport of docosanedioic acid by diffusion	docosdiac[r] <=> docosdiac[c]				Exchange	1	-1000	1000	0	4		NOTES:NCD	PMID:11550799,PMID:1755850,PMID:1794986,PMID:1953646,PMID:2111707,PMID:3143362,PMID:39554,PMID:7213753,PMID:7575473,PMID:8985184,PMID:9020182,PMID:9054950
DOCOSDIACTD	excretion of docosanedioic acid	docosdiac[c] <=> docosdiac[e]				Exchange	1	-1000	1000	0	4		NOTES:NCD	PMID:11550799,PMID:1755850,PMID:1794986,PMID:1953646,PMID:2111707,PMID:3143362,PMID:39554,PMID:7213753,PMID:7575473,PMID:8985184,PMID:9020182,PMID:9054950
FAOXC101C102x	fatty acid beta oxidation(C10:1-->C10:2)x	o2[x] + dece4coa[x] -> h2o2[x] + dec24dicoa[x]				Exchange	0	0	1000	0	4		NOTES:NCD	PMID:11550799,PMID:1755850,PMID:1794986,PMID:1953646,PMID:2111707,PMID:3143362,PMID:39554,PMID:7213753,PMID:7575473,PMID:8985184,PMID:9020182,PMID:9054950
FAOXC101C8m	fatty acid beta oxidation(C10:1-->C8)m	h2o[m] + coa[m] + nad[m] + dc2coa[m] -> h[m] + nadh[m] + accoa[m] + occoa[m]				Exchange	0	0	1000	0	4		NOTES:NCD	PMID:11550799,PMID:1755850,PMID:1794986,PMID:1953646,PMID:2111707,PMID:3143362,PMID:39554,PMID:7213753,PMID:7575473,PMID:8985184,PMID:9020182,PMID:9054950
FAOXC101C8x	fatty acid beta oxidation(C10:1-->C8:0)x	nad[x] + coa[x] + h2o[x] + dc2coa[x] -> h[x] + nadh[x] + accoa[x] + occoa[x]				Exchange	0	0	1000	0	4		NOTES:NCD	PMID:11550799,PMID:1755850,PMID:1794986,PMID:1953646,PMID:2111707,PMID:3143362,PMID:39554,PMID:7213753,PMID:7575473,PMID:8985184,PMID:9020182,PMID:9054950
FAOXC101m	isomerization(C10:1)m	dece3coa[m] -> dc2coa[m]				Exchange	0	0	1000	0	4		NOTES:NCD	PMID:11550799,PMID:1755850,PMID:1794986,PMID:1953646,PMID:2111707,PMID:3143362,PMID:39554,PMID:7213753,PMID:7575473,PMID:8985184,PMID:9020182,PMID:9054950
FAOXC101x	isomerization(C10:1)x	dece3coa[x] -> dc2coa[x]				Exchange	0	0	1000	0	4		NOTES:NJ	PMID:7601472
FAOXC102C101x	fatty acid beta oxidation(C10:2-->C10:1)x	h[x] + nadph[x] + dec24dicoa[x] -> nadp[x] + dece3coa[x]				Exchange	0	0	1000	0	4		NOTES:unknown mechanism, however these blood groups need to make it to the extracellular surface of cells NJ
FAOXC102C103x	fatty acid beta oxidation(C10:2-->C10:3)x	o2[x] + dec47dicoa[x] -> h2o2[x] + dectricoa[x]				Exchange	0	0	1000	0	4		NOTES:unknown mechanism, however these blood groups need to make it to the extracellular surface of cells NJ
FAOXC102C81x	fatty acid beta oxidation(C10:2-->C8:1)x	nad[x] + coa[x] + h2o[x] + 2decdicoa[x] -> h[x] + nadh[x] + accoa[x] + octe5coa[x]				Exchange	0	0	1000	0	4		NOTES:unknown mechanism, however these blood groups need to make it to the extracellular surface of cells NJ
FAOXC102x	isomerization(C10:2)x	3decdicoa[x] -> 2decdicoa[x]				Exchange	0	0	1000	0	4		NOTES:unknown mechanism, however these blood groups need to make it to the extracellular surface of cells NJ
FAOXC103C102x	fatty acid beta oxidation(C10:3-->C10:2)x	h[x] + nadph[x] + dectricoa[x] -> nadp[x] + 3decdicoa[x]				Exchange	0	0	1000	0	4		NOTES:unknown mechanism, however these blood groups need to make it to the extracellular surface of cells NJ
FAOXC10C10OHm	fatty acid beta oxidation(C10-->OHC10)m	h2o[m] + fad[m] + dcacoa[m] -> fadh2[m] + 3hdcoa[m]				Exchange	0	0	1000	0	2		NOTES:unknown mechanism, however these blood groups need to make it to the extracellular surface of cells NJ
FAOXC10C8m	fatty acid beta oxidation(C10-->C8)m	h2o[m] + coa[m] + nad[m] + fad[m] + dcacoa[m] -> h[m] + nadh[m] + accoa[m] + fadh2[m] + occoa[m]				Exchange	0	0	1000	0	2		NOTES:unknown mechanism for transport - intracellular transport occurs, most details are unknown - see for example Varki glycobiology text or numerous reviews (PMID: 8206147) - extracellular transport is also made available since metabolites can get to outer plasma membrane NJ	PMID:8206147
FAOXC10C8x	fatty acid beta oxidation(C10-->C8)x	nad[x] + coa[x] + dcacoa[x] + o2[x] + h2o[x] -> h[x] + nadh[x] + accoa[x] + occoa[x] + h2o2[x]				Exchange	0	0	1000	0	2		NOTES:unknown mechanism for transport - intracellular transport occurs, most details are unknown - see for example Varki glycobiology text or numerous reviews (PMID: 8206147) NJ	PMID:8206147
FAOXC10DCC8DCx	fatty acid beta oxidation(C10DC-->C8DC)	nad[x] + coa[x] + o2[x] + h2o[x] + sebcoa[x] -> h[x] + nadh[x] + accoa[x] + h2o2[x] + sbcoa[x]				Exchange	0	0	1000	0	2		NOTES:unknown mechanism for transport - however must get to other intracellular compartments (e.g. lysosome for degradation) NJ
FAOXC121C101m	fatty acid beta oxidation(C12:1-->C10:1)m	h2o[m] + coa[m] + nad[m] + fad[m] + dd5ecoa[m] -> h[m] + nadh[m] + accoa[m] + fadh2[m] + dece3coa[m]				Exchange	0	0	1000	0	2		NOTES:unknown mechanism for transport - however must get to other intracellular compartments (e.g. lysosome for degradation) NJ
FAOXC121C10x	fatty acid beta xoidation(C12:1-->C10)x	nad[x] + coa[x] + h2o[x] + dd2coa[x] -> h[x] + nadh[x] + accoa[x] + dcacoa[x]				Exchange	0	0	1000	0	2		NOTES:NJ	PMID:1601877,PMID:8702839
FAOXC121x	isomerization(C12:1)x	dd3coa[x] -> dd2coa[x]				Exchange	0	0	1000	0	1		NOTES:NJ	PMID:1601877
FAOXC122x	isomerization(C12:2)x	3ddecdicoa[x] -> 2ddecdicoa[x]				Exchange	0	0	1000	0	1		NOTES:NJ	PMID:1601877
FAOXC123C102x	fatty acid beta oxidation(C12:3-->C10:2)x	nad[x] + coa[x] + h2o[x] + 2dodtricoa[x] -> h[x] + nadh[x] + accoa[x] + dec47dicoa[x]				Exchange	0	0	1000	0	1		NOTES:NJ	PMID:1601877
FAOXC123x	isomerization(C12:3)x	3dodtricoa[x] -> 2dodtricoa[x]				Exchange	0	0	1000	0	1		NOTES:INVALID ECO TERM: IFH	PMID:4371022
FAOXC12C10m	fatty acid beta oxidation(C12-->C10)m	h2o[m] + coa[m] + nad[m] + fad[m] + ddcacoa[m] -> h[m] + nadh[m] + accoa[m] + fadh2[m] + dcacoa[m]				Exchange	0	0	1000	0	4		NOTES:NCD	PMID:11788602,PMID:12163485,PMID:12446672,PMID:12512856
FAOXC12C10x	fatty acid beta oxidation(C12-->C10)x	nad[x] + coa[x] + ddcacoa[x] + o2[x] + h2o[x] -> h[x] + nadh[x] + accoa[x] + dcacoa[x] + h2o2[x]				Exchange	0	0	1000	0	4		NOTES:NCD	PMID:11514575,PMID:11788602,PMID:12163485,PMID:12446672,PMID:12512856,PMID:12716890,PMID:12761225,PMID:12907687
FAOXC12C12OHm	fatty acid beta oxidation(C12-->OHC12)m	h2o[m] + fad[m] + ddcacoa[m] -> fadh2[m] + 3hddcoa[m]				Exchange	0	0	1000	0	4		NOTES:NCD	PMID:11514575,PMID:11788602,PMID:12163485,PMID:12446672,PMID:12512856,PMID:12716890,PMID:12761225,PMID:12907687
FAOXC12DCC10DCx	fatty acid beta oxidation(C12DC-->C10DC)x	nad[x] + coa[x] + o2[x] + h2o[x] + c12dccoa[x] -> h[x] + nadh[x] + accoa[x] + h2o2[x] + sebcoa[x]				Exchange	0	0	1000	0	4		NOTES:NCD	PMID:11514575,PMID:11788602,PMID:12163485,PMID:12446672,PMID:12512856,PMID:12716890,PMID:12761225,PMID:12907687
FAOXC12DCTc	transport of dodecanedioyl carnitine into cytosol	c12dc[x] <=> c12dc[c]				Exchange	1	-1000	1000	0	0		NOTES:NCD	PMID:11514575,PMID:11788602,PMID:12163485,PMID:12446672,PMID:12512856,PMID:12716890,PMID:12761225,PMID:12907687
FAOXC12DCc	formation of dodecanedioyl carnitine	crn[c] + c12dccoa[c] <=> coa[c] + c12dc[c]				Exchange	1	-1000	1000	0	4		NOTES:NCD	PMID:10767557,PMID:12417297,PMID:12507512,PMID:12634319,PMID:15147861,PMID:9765313
FAOXC12DCx	production of dodecanedioyl carnitine	crn[x] + c12dccoa[x] <=> coa[x] + c12dc[x]				Exchange	1	-1000	1000	0	4		NOTES:	PMID:12704219
FAOXC141C121m	fatty acid beta oxidation(C14:1-->C12:1)m	h2o[m] + coa[m] + nad[m] + fad[m] + tetd7ecoa[m] -> h[m] + nadh[m] + accoa[m] + fadh2[m] + dd5ecoa[m]				Exchange	0	0	1000	0	4		NOTES:unknown mechanism for transport - not known if it is energy dependent or not, recycling and IC transport is important to get it to other areas of the cell NJ
FAOXC141C121x	fatty acid beta xoidation(C14:1-->C12:1)x	nad[x] + coa[x] + o2[x] + h2o[x] + tetde5coa[x] -> h[x] + nadh[x] + accoa[x] + h2o2[x] + dd3coa[x]				Exchange	0	0	1000	0	4		NOTES:unknown mechanism for transport - not known if it is energy dependent or not, recycling and IC transport is important to get it to other areas of the cell NJ
FAOXC141C141OHm	fatty acid beta oxidation(C14:1-->C14:1OH)m	h2o[m] + fad[m] + tetd7ecoa[m] -> fadh2[m] + 3tetd7ecoa[m]				Exchange	0	0	1000	0	4		NOTES:	PMID:1427861
FAOXC142C122x	fatty acid beta oxidation(C14:2-->C12:2)x	nad[x] + coa[x] + o2[x] + h2o[x] + tetdecdicoa[x] -> h[x] + nadh[x] + accoa[x] + h2o2[x] + 3ddecdicoa[x]				Exchange	0	0	1000	0	0		NOTES:NCD	PMID:10421229,PMID:10821868,PMID:10860996,PMID:11247674,PMID:11592815,PMID:11882499,PMID:12135767,PMID:12750891,PMID:1701966,PMID:2182619,PMID:3103217,PMID:3170580,PMID:3399500,PMID:3839598,PMID:7926364,PMID:8504756,PMID:9230074,PMID:9770484
FAOXC143C123x	fatty acid beta oxidation(C14:3-->C12:3)x	nad[x] + coa[x] + o2[x] + h2o[x] + 5tedtricoa[x] -> h[x] + nadh[x] + accoa[x] + h2o2[x] + 3dodtricoa[x]				Exchange	0	0	1000	0	2		NOTES:	PMID:11024018,PMID:11034615,PMID:12748858,PMID:2490366,PMID:8063771
FAOXC14C12m	fatty acid beta oxidation(C14-->C12)m	h2o[m] + coa[m] + nad[m] + fad[m] + tdcoa[m] -> h[m] + nadh[m] + accoa[m] + fadh2[m] + ddcacoa[m]				Exchange	0	0	1000	0	1		NOTES:NCD	PMID:11551958,PMID:12512856
FAOXC14C12x	fatty acid beta oxidation(C14-->C12)x	nad[x] + coa[x] + tdcoa[x] + o2[x] + h2o[x] -> h[x] + nadh[x] + accoa[x] + ddcacoa[x] + h2o2[x]				Exchange	0	0	1000	0	1		NOTES:NCD	PMID:12748858,PMID:15607332
FAOXC14C14OHm	fatty acid beta oxidation(C14-->C14OH)m	h2o[m] + fad[m] + tdcoa[m] -> fadh2[m] + 3htdcoa[m]				Exchange	0	0	1000	0	0		NOTES:NCD	PMID:10438455,PMID:1073568,PMID:12512856
FAOXC14DCC12DCx	fatty acid beta oxidation(C14DC-->C12DC)x	nad[x] + coa[x] + o2[x] + h2o[x] + c14dccoa[x] -> h[x] + nadh[x] + accoa[x] + h2o2[x] + c12dccoa[x]				Exchange	0	0	1000	0	4		NOTES:NCD	PMID:1751541,PMID:8993166
FAOXC161C141m	fatty acid beta oxidation(C16:1-->C14:1)m	h2o[m] + coa[m] + nad[m] + fad[m] + hdcoa[m] -> h[m] + nadh[m] + accoa[m] + fadh2[m] + tetd7ecoa[m]				Exchange	0	0	1000	0	4		NOTES:Human Y/N: Y	PMID:9119383
FAOXC161C141x	fatty acid beta xoidation(C16:1-->C14:1)x	nad[x] + coa[x] + o2[x] + h2o[x] + hexde7coa[x] -> h[x] + nadh[x] + accoa[x] + h2o2[x] + tetde5coa[x]				Exchange	0	0	1000	0	4		NOTES:	PMID:11882499,PMID:12135767,PMID:12750891,PMID:1701966,PMID:2182619,PMID:2656669,PMID:3103217,PMID:3399500,PMID:3839598,PMID:7926364,PMID:9770484
FAOXC161C161OHm	production of 3-hydroxyhexadecenoylcoA	h2o[m] + fad[m] + hdcoa[m] -> fadh2[m] + 3hdeccoa[m]				Exchange	0	0	1000	0	4		NOTES:NCD	PMID:3143729
FAOXC163C142x	fatty acid beta oxidation(C16:3-->C14:2)x	nad[x] + coa[x] + h2o[x] + 2hexdtricoa[x] -> h[x] + nadh[x] + accoa[x] + tetdecdicoa[x]				Exchange	0	0	1000	0	4		NOTES:for humans - seq predicted SLC transporters have been found to have O-acetylation activity on gangliosides NJ
FAOXC163C164x	fatty acid beta oxidation(C16:3-->C16:4)x	o2[x] + 4hexdtricoa[x] -> h2o2[x] + hexdectecoa[x]				Exchange	0	0	1000	0	2		NOTES:for humans - seq predicted SLC transporters have been found to have O-acetylation activity on gangliosides NJ
FAOXC163x	isomerization(C16:3)x	3hexdtricoa[x] -> 2hexdtricoa[x]				Exchange	0	0	1000	0	0		NOTES:for humans - seq predicted SLC transporters have been found to have O-acetylation activity on gangliosides NJ
FAOXC164C143x	fatty acid beta oxidation(C16:4-->C14:3)x	nad[x] + coa[x] + h2o[x] + 2hexdtetcoa[x] -> h[x] + nadh[x] + accoa[x] + 5tedtricoa[x]				Exchange	0	0	1000	0	4		NOTES:for humans - seq predicted SLC transporters have been found to have O-acetylation activity on gangliosides NJ
FAOXC164C163x	fatty acid beta oxidation(C16:4-->C16:3)x	h[x] + nadph[x] + hexdectecoa[x] -> nadp[x] + 3hexdtricoa[x]				Exchange	0	0	1000	0	4		NOTES:SMP. Same reaction as GAPDH, but localied to spermatids. NOTE: I think &quot;glyceroyl&quot; in this and many other reactions should be &quot;glycerol&quot;. There are &quot;glyceroyl&quot; compounds, but I don&apos;t think that is what is intended here.	PMID:10714828
FAOXC164C165x	fatty acid beta oxidation(C16:4-->C16:5)x	o2[x] + 4hexdtetcoa[x] -> h2o2[x] + hexdpencoa[x]				Exchange	0	0	1000	0	4		NOTES:	PMID:12450384,PMID:2183217,PMID:9328467,PMID:9473452
FAOXC164x	isomerization(C16:4)x	3hexdtetcoa[x] -> 2hexdtetcoa[x]				Exchange	0	0	1000	0	4		NOTES:NCD
[truncated: 2,282 more rows]

## Sheet: metabolites
Metabolite name	Metabolite description	Metabolite neutral formula	Metabolite charged formula	Metabolite charge	Metabolite Compartment	Metabolite KEGGID	Metabolite PubChemID	Metabolite CheBI ID	Metabolite Inchi String	Metabolite Smile
[truncated: 3,310 more rows]
