# Supplementary material for: Genome-wide metabolic model to improve understanding of CD4+ T cell metabolism, immunometabolism and application in drug design
Source: Royal Society of Chemistry journal article supplement (doi:10.1039/c5mb00480b), 2015-11-18
Supplement: c5mb00480b1.zip [file supplementary_Table_1-basic_function_tests.xlsx]

## Sheet: 71 constrained reactions
reactions	lower bound	upper bound
EX_arg_L(e)	-0.02375	1000
EX_but(e)	-0.0038	1000
EX_glc(e)	-0.2718	1000
EX_gln_L(e)	-0.0765	1000
EX_hco3(e)	-10	1000
EX_his_L(e)	-0.01	1000
EX_ile_L(e)	-0.01	1000
EX_leu_L(e)	-0.0362216	1000
EX_lys_L(e)	-0.01	1000
EX_met_L(e)	-0.01	1000
EX_o2(e)	-0.3066	1000
EX_ocdca(e)	-0.1	1000
EX_ocdcea(e)	-0.0192	1000
EX_phe_L(e)	-0.01	1000
EX_pi(e)	-10	1000
EX_pyr(e)	-0.0568	1000
EX_thr_L(e)	-0.01	1000
EX_trp_L(e)	-0.01	1000
EX_ttdca(e)	-0.1	1000
EX_val_L(e)	-0.01	1000
ACACT1	0	0.743713
ACACT1r	-1000	0.743713
ACACT1x	0	0.743713
ADRNCPT1	0	0.0399866
AKGDm	0	0.464244
ASPTA	-1000	5.8697
ASPTAm	-1000	5.8697
BDHm	-1000	0.00872784
C160CPT1	0	0.0399866
C161CPT1	0	0.0399866
C161CPT12	0	0.0399866
CLPNDCPT1	0	0.0399866
CSm	0	5.11588
DCSPTN1CPT1	0	0.0399866
DLNLCGCPT1	0	0.0399866
EICOSTETCPT1	0	0.0399866
ELAIDCPT1	0	0.0399866
G6PDH1rer	0	1.70529
GLPASE2	0	0.142956
GLUDxm	-1000	4.4962
GLUDym	-1000	4.4962
GLUNm	0	10.48
GND	0	1.12797
GNDer	0	1.12797
HEX1	0	3.55768
HEXCCPT1	0	0.0399866
L_LACtcm	0	0
L_LACtm	0	0
LDH_L	-35.733	1000
LDH_Lm	-35.733	1000
LGNCCPT1	0	0.0399866
LNELDCCPT1	0	0.0399866
LNLCCPT1	0	0.0399866
LNLNCACPT1	0	0.0399866
LNLNCGCPT1	0	0.0399866
MDH	-1000	21.2633
MDHm	-1000	21.2633
NRVNCCPT1	0	0.0399866
PDHm	0	0.147087
PEPCK	0	0.37278
PEPCKm	0	0.37278
PFK	0	1.048
PIt2m	0	0
PYK	0	22.3527
STRDNCCPT1	0	0.0399866
TETPENT3CPT1	0	0.0399866
TETPENT6CPT1	0	0.0399866
TETTET6CPT1	0	0.0399866
TMNDNCCPT1	0	0.0399866
TTDCPT1	0	0.0399866
VACCCPT1	0	0.0399866

## Sheet: 261test_reactions
Name	Formula	value	Status
Test1	his_L[c] -> glu_L[c]	0.01	TRUE
Test2	glu_L[m] -> pro_L[m]	9.29238	TRUE
Test3	arg_L[m] -> glu_L[m]	0.05	TRUE
Test4	arg_L[c] -> no[c]	0.05	TRUE
Test5	asp_L[c] + hco3[c] -> arg_L[c]	18.2762	TRUE
Test6	gln_L[m] -> glu_L[m]	236.811	TRUE
Test7	glu_L[m] -> akg[m]	44.3254	TRUE
Test8	phe_L[c] -> tyr_L[c]	0.01	TRUE
Test9	phe_L[c] -> phpyr[c]	44.3254	TRUE
Test10	hyptaur[c] -> taur[x]	6.91174e-25	FALSE
Test11	tyr_L[c] -> 34hpp[c]	44.3254	TRUE
Test12	arg_L[c] -> no[c]	0.05	TRUE
Test13	glu5sa[c] -> pro_L[c]	9.29238	TRUE
Test14	glu_L[c] -> gln_L[c]	247.324	TRUE
Test15	gln_L[m] -> glu_L[m]	236.811	TRUE
Test16	3pg[c] -> ser_L[c]	47.0815	TRUE
Test17	3pg[c] -> gly[c]	45.9003	TRUE
Test18	gly[m] -> co2[m] + nh4[m]	37.9277	TRUE
Test19	ser_L[c] -> cys_L[c]	10.1974	TRUE
Test20	so4[c] -> paps[c]	247.746	TRUE
Test21	o2[m] -> h2o2[m]	323.965	TRUE
Test22	asp_L[c] -> asn_L[c]	246.494	TRUE
Test23	asp_L[c] -> oaa[c]	56.0154	TRUE
Test24	asn_L[c] -> oaa[c]	47.9573	TRUE
Test25	asp_L[c] + gtp[c] + imp[c] -> 2 h[c] + pi[c] + gdp[c] + amp[c] + fum[c]	47.7031	TRUE
Test26	atp[c] + asp_L[c] + citr_L[c] -> h[c] + amp[c] + ppi[c] + fum[c] + arg_L[c]	35.8075	TRUE
Test27	glc_D[c] -> pyr[c]	1000	TRUE
Test28	glc_D[c] -> lac_D[c]	1000	TRUE
Test29	glc_D[c] -> lac_L[c] + atp[c] + h2o[c]	715.597	TRUE
Test30	acald[c] -> ac[c]	2	TRUE
Test31	glyc[c] -> glc_D[c]	1000	TRUE
Test32	g6p[c] -> ru5p_D[c]	1000	TRUE
Test33	g6p[c] -> r5p[c]	1000	TRUE
Test34	f6p[c] + g3p[c] -> r5p[c]	42.4045	TRUE
Test35	udpglcur[c] -> xu5p_D[c]	39.3461	TRUE
Test36	fru[c] -> dhap[c]	1000	TRUE
Test37	fru[c] -> g3p[c]	1000	TRUE
Test38	gal[c] -> udpgal[c]	141.286	TRUE
Test39	gal[c] -> glc_D[c]	1000	TRUE
Test40	akg[m] -> oaa[m]	9.29238	TRUE
Test41	succoa[m] -> oaa[m]	36.2161	TRUE
Test42	fum[m] -> oaa[m]	44.3254	TRUE
Test43	gam6p[c] -> uacgam[c]	82.6145	TRUE
Test44	glc_D[c] -> inost[c]	0.000745627	TRUE
Test45	inost[c] -> pail_hs[c]	164.383	TRUE
Test46	inost[c] -> pail4p_hs[c]	98.6299	TRUE
Test47	pail45p_hs[c] -> mi145p[c]	494.881	TRUE
Test48	mi145p[c] -> inost[c]	14.8736	TRUE
Test49	inost[c] -> pail45p_hs[c]	70.4499	TRUE
Test50	dhap[c] -> mthgxl[c]	42.4045	TRUE
Test51	g3p[c] -> mthgxl[c]	42.4045	TRUE
Test52	acetone[c] -> mthgxl[c]	1	TRUE
Test53	mthgxl[c] -> lac_D[c]	125.976	TRUE
Test54	mthgxl[c] -> 12ppd_S[c]	690.649	TRUE
Test55	12ppd_S[c] -> mthgxl[c]	990.172	TRUE
Test56	12ppd_S[c] -> pyr[c]	125.976	TRUE
Test57	acac[m] -> bhb[m]	2.59615	TRUE
Test58	hmgcoa[x] -> chsterol[r]	2.59615	TRUE
Test59	hmgcoa[x] -> chsterol[r]	2.59615	TRUE
Test60	pmtcoa[c] -> crmp_hs[c]	42.8514	TRUE
Test61	pmtcoa[c] -> sphmyln_hs[c]	37.495	TRUE
Test62	chol[c] + dag_hs[c] -> pe_hs[c]	18.9981	TRUE
Test63	prpp[c] -> imp[c]	21.9274	TRUE
Test64	imp[c] -> atp[c]	248.583	TRUE
Test65	imp[c] -> gtp[c]	1000	TRUE
Test66	cmp[c] -> cytd[c]	43.1184	TRUE
Test67	gln_L[c] + hco3[c] -> ump[c]	9.29238	TRUE
Test68	gdp[c] -> dgtp[n]	123.739	TRUE
Test69	cdp[c] -> dctp[n]	124.338	TRUE
Test70	hxan[c] -> imp[c]	187.289	TRUE
Test71	gua[c] -> gmp[c]	247.883	TRUE
Test72	ade[c] -> amp[c]	247.746	TRUE
Test73	accoa[c] -> pmtcoa[c]	98.5002	TRUE
Test74	glyc[c] + Rtotal[c] + Rtotal2[c] -> dag_hs[c]	123.78	TRUE
Test75	ha[l] -> acgam[l] + glcur[l]	1	TRUE
Test76	pro_L[c] -> glu_L[m]	48.2164	TRUE
Test77	carn[c] -> ala_B[c]	0.01	TRUE
Test78	ala_B[c] -> msa[m]	1	TRUE
Test79	ala_D[c] -> pyr[c]	43.096	TRUE
Test80	cys_L[c] -> hyptaur[c]	3.11	TRUE
Test81	taur[x] -> tchola[x]	1	TRUE
Test82	tyr_L[c] -> fum[c] + acac[c]	0.06	TRUE
Test83	tyr_L[c] -> nrpphr[c]	0.06	TRUE
Test84	tyr_L[c] -> dopa[c]	0.06	TRUE
Test85	4abut[c] -> succ[m]	9.29238	TRUE
Test86	met_L[c] -> cys_L[c]	0.01	TRUE
Test87	cys_L[c] -> 3sala[c]	3.11	TRUE
Test88	Lcystin[c] -> cys_L[c]	3.11	TRUE
Test89	pyr[c] <=> ala_L[c]	265.902	TRUE
Test90	ala_L[c] -> pyr[c]	43.096	TRUE
Test91	pyr[c] -> lac_D[c]	265.902	TRUE
Test92	etoh[c] -> acald[c]	1	TRUE
Test93	lac_L[c] -> glc_D[c]	88.634	TRUE
Test94	pyr[c] -> nad[m] + h[m]	53.3112	TRUE
Test95	inost[c] -> xu5p_D[c]	495.839	TRUE
Test96	hpyr[c] -> 2pg[c]	42.866	TRUE
Test97	aact[c] -> mthgxl[c]	214.087	TRUE
Test98	ppcoa[m] -> succoa[m]	1000	TRUE
Test99	thmmp[e] -> thmpp[c]	1	TRUE
Test100	adp[c] -> datp[n]	123.824	TRUE
Test101	udp[c] -> dttp[n]	0.000418657	TRUE
Test102	pydx[c] -> pydx5p[c]	246.494	TRUE
Test103	h2o2[m] -> o2[m] + h2o[m]	1000	TRUE
Test104	pmtcoa[c] -> malcoa[m]	29.4098	TRUE
Test105	gln_L[c] -> nh4[c]	9.29238	TRUE
Test106	akg[c] -> glu_L[c]	213.03	TRUE
Test107	akg[m] -> glu_L[m]	227.871	TRUE
Test108	cys_L[c] + glu_L[c] + gly[c] -> gthrd[c]	123.655	TRUE
Test109	thr_L[c] -> ppcoa[c]	0.01	TRUE
Test110	val_L[c] -> succoa[m]	0.05	TRUE
Test111	pyr[c] -> accoa[m] + co2[c] + nadh[m]	3.46348	TRUE
Test112	val_L[m] -> succoa[m]	0.05	TRUE
Test113	trp_L[c] -> accoa[c]	0.01	TRUE
Test114	leu_L[m] -> accoa[m]	0.0362216	TRUE
Test115	ile_L[m] -> accoa[m]	0.01	TRUE
Test116	arachd[c] -> malcoa[m]	1	TRUE
Test117	biomass_reacton	0	FALSE
Test118	ptrc[c] -> ala_B[c]	0	FALSE
Test119	ura[c] -> ala_B[c]	0	FALSE
Test120	asp_L[c] -> ala_B[c]	0	FALSE
Test121	cytd[c] -> ala_B[c]	0	FALSE
Test122	ump[c] -> ala_B[c]	0	FALSE
Test123	dcmp[c] -> ala_B[c]	0	FALSE
Test124	hista[c] -> im4ac[c]	0	FALSE
Test125	his_L[c] -> hista[c]	0	FALSE
Test126	hista[c] -> 3mlda[c]	0	FALSE
Test127	phe_L[c] -> peamn[c]	0	FALSE
Test128	phe_L[c] -> pacald[c]	0	FALSE
Test129	trp_L[c] -> srtn[c]	0	FALSE
Test130	trp_L[c] -> Lfmkynr[c]	0	FALSE
Test131	trp_L[c] -> nformanth[c]	0	FALSE
Test132	srtn[c] -> f5hoxkyn[c]	0	FALSE
Test133	trp_L[c] -> id3acald[c]	0	FALSE
Test134	tyr_L[c] -> 4hphac[c]	0	FALSE
Test135	orn[c] -> ptrc[c]	0	FALSE
Test136	arg_L[c] -> pcreat[c]	0	FALSE
Test137	arg_L[c] -> creat[c]	0	FALSE
Test138	ipdp[x] -> sql[r]	-1.01292e-14	FALSE
Test139	glu_L[c] -> 4abut[c]	0	FALSE
Test140	glc_D[c] -> lcts[g]	0	FALSE
Test141	Tyr_ggn[c] -> glygn2[c]	0	FALSE
Test142	glygn2[c] -> glc_D[c]	0	FALSE
Test143	man6p[c] -> kdn[c]	0	FALSE
Test144	man[c] -> gdpmann[c]	1.62532e-29	FALSE
Test145	gdpmann[c] -> gdpfuc[c]	6.6638e-28	FALSE
Test146	acgam[c] -> cmpacna[c]	5.92848e-29	FALSE
Test147	xylu_D[c] -> glyclt[c]	0	FALSE
Test148	acac[m] -> acetone[m]	0	FALSE
Test149	hmgcoa[x] -> frdp[x]	0	FALSE
Test150	val_L[m] -> 3aib[m]	0	FALSE
Test151	frdp[c] -> dolichol_U[c]	0	FALSE
Test152	frdp[c] -> dolichol_L[c]	1.63983e-15	FALSE
Test153	dolichol_L[r] -> dolmanp_L[r]	-1.58035e-27	FALSE
Test154	dolichol_U[r] -> dolmanp_U[r]	0	FALSE
Test155	dolichol_U[r] -> g3m8mpdol_U[r]	-1.45913e-29	FALSE
Test156	dolichol_L[r] -> g3m8mpdol_L[r]	0	FALSE
Test157	n2m2nmasn[l] -> man[l] + acgam[l]	0	FALSE
Test158	uacgam[c] + udpglcur[c] -> ha[e]	-1.06758e-28	FALSE
Test159	msa[c] -> ala_B[c]	0	FALSE
Test160	ptrc[c] -> spmd[c]	0	FALSE
Test161	spmd[c] -> sprm[c]	0	FALSE
Test162	phe_L[c] -> pheacgln[c]	0	FALSE
Test163	phe_L[c] -> pac[c]	0	FALSE
Test164	phe_L[c] -> phaccoa[c]	0	FALSE
Test165	selmeth[c] -> selnp[c]	0	FALSE
Test166	dna[n] -> dna5mtc[n]	0	FALSE
Test167	Lcyst[c] -> taur[x]	0	FALSE
Test168	trp_L[c] -> melatn[c]	0	FALSE
Test169	trp_L[c] -> Lkynr[c]	0	FALSE
Test170	srtn[c] -> 5moxact[c]	0	FALSE
Test171	srtn[c] -> 6hoxmelatn[c]	0	FALSE
Test172	srtn[c] -> fna5moxam[c]	0	FALSE
Test173	srtn[c] -> nmthsrtn[c]	0	FALSE
Test174	trp_L[c] -> quln[c]	0	FALSE
Test175	trp_L[c] -> anth[c]	0	FALSE
Test176	trp_L[c] -> kynate[c]	0	FALSE
Test177	tyr_L[c] -> T3[c] + T4[c]	0	FALSE
Test178	tyr_L[c] -> adrnl[c]	0	FALSE
Test179	tyr_L[c] -> melanin[c]	0	FALSE
Test180	dopa[c] -> homoval[c]	0	FALSE
Test181	npphr[c] -> 34dhoxpeg[c]	0	FALSE
Test182	adrnl[c] -> 34dhoxpeg[c]	0	FALSE
Test183	orn[c] -> spmd[c]	0	FALSE
Test184	orn[c] -> sprm[c]	0	FALSE
Test185	dmpp[c] -> ggdp[c]	0	FALSE
Test186	coke[r] -> pecgoncoa[r]	0	FALSE
Test187	acorn[c] -> orn[c]	0	FALSE
Test188	4hpro_LT[m] -> glx[m]	0	FALSE
Test189	chol[m] -> glyb[m]	0	FALSE
Test190	5aop[m] -> pheme[m]	0	FALSE
Test191	pheme[c] -> bilirub[c]	0	FALSE
Test192	pyr[c] -> fad[m] + h[m]	0	FALSE
Test193	ascb_L[c] -> thrnt[c]	0	FALSE
Test194	ascb_L[c] -> eryth[c]	0	FALSE
Test195	ascb_L[c] -> lyxnt[c]	0	FALSE
Test196	ascb_L[c] -> xylnt[c]	0	FALSE
Test197	glygn2[e] -> glc_D[e]	0	FALSE
Test198	strch1[e] -> glc_D[e]	0	FALSE
Test199	fuc_L[c] -> gdpfuc[c]	0	FALSE
Test200	acgal[c] -> udpacgal[c]	0	FALSE
Test201	g1p[c] -> dtdprmn[c]	0	FALSE
Test202	itacon[m] -> pyr[m]	0	FALSE
Test203	mescon[m] -> pyr[m]	0	FALSE
Test204	hpyr[c] -> glyclt[c]	0	FALSE
Test205	glyclt[c] -> gly[c]	0	FALSE
Test206	glyx[c] -> oxa[c]	0	FALSE
Test207	glx[m] -> glyclt[m]	0	FALSE
Test208	hpyr[c] -> glyc_S[c]	0	FALSE
Test209	hmgcoa[x] -> xoldiolone[r]	0	FALSE
Test210	hmgcoa[x] -> xoltriol[c]	0	FALSE
Test211	galgluside_hs[g] -> gd1c_hs[g]	0	FALSE
Test212	galgluside_hs[g] -> gq1balpha_hs[g]	0	FALSE
Test213	galgluside_hs[g] -> gp1c_hs[g]	0	FALSE
Test214	galgluside_hs[g] -> gd1b2_hs[g]	0	FALSE
Test215	galgluside_hs[g] -> acgagbside_hs[g]	0	FALSE
Test216	galgluside[g] -> galgalgalthcrm_hs[g]	0	FALSE
Test217	galgluside_hs[g] -> acnacngalgbside_hs[g]	0	FALSE
Test218	gluside_hs[g] -> galgluside_hs[g]	0	FALSE
Test219	arachd[r] -> txa2[r]	0	FALSE
Test220	thm[e] -> thmpp[m]	0	FALSE
Test221	thmmp[e] -> thmpp[m]	0	FALSE
Test222	thm[c] -> thmpp[c]	0	FALSE
Test223	adn[c] -> urate[x]	0	FALSE
Test224	imp[c] -> urate[x]	0	FALSE
Test225	gsn[c] -> urate[x]	0	FALSE
Test226	tyr_L[m] -> q10[m]	0	FALSE
Test227	thcholstoic[x] -> gchola[x]	0	FALSE
Test228	thcholstoic[x] -> tchola[x]	0	FALSE
Test229	uacgam[r] -> m8masn[r]	0	FALSE
Test230	m8masn[r] -> nm4masn[g]	4.25102e-26	FALSE
Test231	nm4masn[g] -> l2fn2m2masn[g]	-2.64698e-27	FALSE
Test232	nm4masn[g] -> s2l2fn2m2masn[g]	-1.29457e-28	FALSE
Test233	nm4masn[g] -> n2m2nmasn[g]	0	FALSE
Test234	s2l2fn2m2masn[l] -> man[l] + acgam[l]	0	FALSE
Test235	Ser_Thr[g] + udpacgal[g] -> dsTn_antigen[g]	0	FALSE
Test236	Ser_Thr[g] + udpacgal[g] -> sTn_antigen[g]	0	FALSE
Test237	Ser_Thr[g] + udpacgal[g] -> core2[g]	3.82094e-28	FALSE
Test238	Ser_Thr[g] + udpacgal[g] -> core4[g]	0	FALSE
Test239	pail_hs[r] -> gpi_prot_hs[r]	0	FALSE
Test240	Ser_Gly_Ala_X_Gly[r] -> cs_pre[g]	0	FALSE
Test241	Ser_Gly_Ala_X_Gly[r] -> cspg_a[g]	0	FALSE
Test242	Ser_Gly_Ala_X_Ser[r] -> cspg_b[g]	0	FALSE
Test243	Ser_Gly_Ala_X_Gly[r] -> cspg_c[g]	0	FALSE
Test244	Ser_Gly/Ala_X_Gly[r] -> cspg_d[g]	0	FALSE
Test245	Ser_Gly/Ala_X_Gly[r] -> cspg_e[g]	0	FALSE
Test246	core2[g] -> ksii_core2[g]	-4.16829e-28	FALSE
Test247	core4[g] -> ksii_core4[g]	0	FALSE
Test248	l2fn2m2masn[g] -> ksi[g]	0	FALSE
Test249	Ser_Gly_Ala_X_Gly[r] -> hspg[g]	0	FALSE
Test250	hspg[l] -> 2 gal[l] + glcur[l] + xyl_D[l]	0	FALSE
Test251	cspg_a[l] -> 2 gal[l] + glcur[l] + xyl_D[l]	0	FALSE
Test252	cspg_b[l] -> 2gal[l] + glcur[l] + xyl_D[l]	0	FALSE
Test253	cspg_c[l] -> 2 gal[l] + glcur[l] + xyl_D[l]	0	FALSE
Test254	cspg_d[l] -> 2 gal[l] + glcur[l] + xyl_D[l]	0	FALSE
Test255	cspg_e[l] -> 2 gal[l] + glcur[l] + xyl_D[l]	0	FALSE
Test256	ksi[l] -> man[l] + acgam[l]	0	FALSE
Test257	ksii_core2[l] -> Ser_Thr[l]	-8.54487e-29	FALSE
Test258	ksii_core4[l] -> Ser_Thr[l]	0	FALSE
Test259	glyb[m] -> gly[m]	0	FALSE
Test260	3sala[c] -> so4[c]	0	FALSE
Test261	Ser_Thr[g] + udpacgal[g] -> Tn_antigen[g]	-1.73679e-29	FALSE
