# Supplementary material for: Genome-wide metabolic model to improve understanding of CD4+ T cell metabolism, immunometabolism and application in drug design
Source: Royal Society of Chemistry journal article supplement (doi:10.1039/c5mb00480b), 2015-11-18
Supplement: c5mb00480b1.zip [file supplementary_Table_2-carbohydrate_metabolism.xlsx]

## Sheet: Top 10 prctile rxn markers_glc
reactions	subsystem	formular	weights
ASNS1	Alanine and aspartate metabolism	h2o[c] + atp[c] + asp_L[c] + gln_L[c] -> h[c] + glu_L[c] + amp[c] + ppi[c] + asn_L[c]	1636.46
G6PDA	Aminosugar metabolism	h2o[c] + gam6p[c] -> nh4[c] + f6p[c]	2525.8
r0364	Aminosugar metabolism	datp[c] + gam[c] -> h[c] + gam6p[c] + dadp[c]	-5868.65
G5SADrm	Arginine and Proline Metabolism	glu5sa[m] -> h[m] + h2o[m] + 1pyr5c[m]	-2678.76
ITCOALm	C5-branched dibasic acid metabolism	coa[m] + atp[m] + itacon[m] <=> h[m] + adp[m] + pi[m] + itaccoa[m]	-2798.42
MECOALm	C5-branched dibasic acid metabolism	coa[m] + atp[m] + mescon[m] <=> h[m] + adp[m] + pi[m] + mescoa[m]	-2800.85
HMGLm	Cholesterol metabolism	hmgcoa[m] -> accoa[m] + acac[m]	2757.3
FUM	Citric acid cycle	h2o[c] + fum[c] <=> mal_L[c]	-1986.46
MDH	Citric acid cycle	nad[c] + mal_L[c] <=> h[c] + nadh[c] + oaa[c]	-2507.55
LTC4CP	Eicosanoid metabolism	h2o[c] + leuktrC4[c] <=> gly[c] + leuktrF4[c]	1502.94
MCD	Exchange	h[c] + malcoa[c] -> co2[c] + accoa[c]	1441.84
DCSPTN1COAtxc	Exchange	h2o[c] + atp[c] + dcsptn1coa[c] -> adp[c] + h[c] + pi[c] + dcsptn1coa[x]	2756.2
FAOXC6C4x	Exchange	nad[x] + coa[x] + o2[x] + h2o[x] + hxcoa[x] -> h[x] + nadh[x] + accoa[x] + h2o2[x] + btcoa[x]	-1446.11
ALAyLATthc	Exchange	h[e] + ala_L[e] + arg_L[c] -> h[c] + ala_L[c] + arg_L[e]	-1759.73
CYSATB0tc	Exchange	2 na1[e] + cys_L[e] + cl[e] -> 2 na1[c] + cys_L[c] + cl[c]	1933.18
CYSPHELAT2tc	Exchange	cys_L[e] + phe_L[c] -> cys_L[c] + phe_L[e]	2776.58
CYSSNAT5tc	Exchange	h[c] + na1[e] + cys_L[e] <=> h[e] + na1[c] + cys_L[c]	1779.67
CYSTALArBATtc	Exchange	ala_L[c] + Lcystin[e] -> ala_L[e] + Lcystin[c]	3394.7
GALSGLT1le	Exchange	h2o[c] + atp[c] + na1[e] + gal[e] -> adp[c] + h[c] + pi[c] + na1[c] + gal[c]	3591.53
ILEATB0tc	Exchange	2 na1[e] + cl[e] + ile_L[e] -> 2 na1[c] + cl[c] + ile_L[c]	2688.62
ILEPHELAT2tc	Exchange	ile_L[e] + phe_L[c] -> phe_L[e] + ile_L[c]	3532.01
LEUATB0tc	Exchange	2 na1[e] + cl[e] + leu_L[e] -> 2 na1[c] + cl[c] + leu_L[c]	2731.46
LEUPHELAT2tc	Exchange	leu_L[e] + phe_L[c] <=> phe_L[e] + leu_L[c]	3574.95
LEUyLAThtc	Exchange	h[e] + arg_L[c] + leu_L[e] -> h[c] + arg_L[e] + leu_L[c]	1815.22
METyLATthc	Exchange	h[e] + arg_L[c] + met_L[e] -> h[c] + arg_L[e] + met_L[c]	-1802.52
ORNALArBATtc	Exchange	ala_L[c] + orn[e] -> orn[c] + ala_L[e]	3574.88
PHEyLATthc	Exchange	h[e] + arg_L[c] + phe_L[e] -> h[c] + arg_L[e] + phe_L[c]	-1759.72
PROIMINOtc	Exchange	2 na1[e] + cl[e] + pro_L[e] -> 2 na1[c] + cl[c] + pro_L[c]	2731.4
THRATB0tc	Exchange	2 na1[e] + thr_L[e] + cl[e] -> 2 na1[c] + thr_L[c] + cl[c]	2745.17
THRPHELAT2tc	Exchange	thr_L[e] + phe_L[c] -> thr_L[c] + phe_L[e]	3588.69
TRPATB0tc	Exchange	2 na1[e] + cl[e] + trp_L[e] -> 2 na1[c] + cl[c] + trp_L[c]	2688.72
TYRATB0tc	Exchange	2 na1[e] + cl[e] + tyr_L[e] -> 2 na1[c] + cl[c] + tyr_L[c]	2688.6
TYRPHELAT2tc	Exchange	tyr_L[e] + phe_L[c] -> phe_L[e] + tyr_L[c]	3532.07
VALLAT1tc	Exchange	val_L[e] + leu_L[c] -> leu_L[e] + val_L[c]	-3617.84
RTOTAL2FATPc	Exchange	atp[c] + coa[c] + Rtotal2[e] -> amp[c] + ppi[c] + Rtotal2coa[c]	1791.14
ARTFR202	Exchange	h[m] + nadph[m] + 2 fadh2[m] + lnlncacoa[c] -> nadp[m] + 2 fad[m] + 1.125 R2coa_hs[c]	1491.11
ARTFR205	Exchange	h[m] + nadph[m] + 2 fadh2[m] + dlnlcgcoa[c] -> nadp[m] + 2 fad[m] + 1.25 R2coa_hs[c]	1637.16
ARTFR206	Exchange	2 h[m] + 2 nadph[m] + 2 fadh2[m] + arachdcoa[c] -> 2 nadp[m] + 2 fad[m] + 1.25 R2coa_hs[c]	1514.49
ARTFR211	Exchange	2 h[m] + 2 nadph[m] + 3 fadh2[m] + clpndcoa[c] -> 2 nadp[m] + 3 fad[m] + 1.375 R2coa_hs[c]	2195.78
ARTFR212	Exchange	2 h[m] + 2 nadph[m] + 3 fadh2[m] + dcsptn1coa[c] -> 2 nadp[m] + 3 fad[m] + 1.375 R2coa_hs[c]	2362.54
ARTFR213	Exchange	3 h[m] + 3 nadph[m] + 3 fadh2[m] + c226coa[c] -> 3 nadp[m] + 3 fad[m] + 1.375 R2coa_hs[c]	2013.49
ACTLMO	Exchange	o2[c] + h[c] + nadph[c] + acetol[c] -> 2 h2o[c] + nadp[c] + mthgxl[c]	-1466.35
ETOHMO	Exchange	o2[c] + h[c] + nadph[c] + etoh[c] -> 2 h2o[c] + nadp[c] + acald[c]	-1456.45
G3PD2m	Exchange	fad[m] + glyc3p[c] -> fadh2[m] + dhap[c]	-3291.57
L_LACDcm	Exchange	2 ficytC[m] + lac_L[c] -> 2 h[c] + pyr[c] + 2 focytC[m]	-2816.2
ADK1	Exchange	atp[c] + 6 h[c] + amp[c] <=> 2 adp[c]	1741.64
ADK1m	Exchange	atp[m] + amp[m] <=> h[m] + 2 adp[m]	-2411.37
EX_2425dhvitd3(e)	Exchange/demand reaction	2425dhvitd3[e] <=>	-1714.15
EX_ade(e)	Exchange/demand reaction	ade[e] <=>	-2315.97
EX_asn_L(e)	Exchange/demand reaction	asn_L[e] <=>	-4752.06
EX_camp(e)	Exchange/demand reaction	camp[e] <=>	-2856.99
EX_csn(e)	Exchange/demand reaction	csn[e] <=>	-5582.33
EX_dad_2(e)	Exchange/demand reaction	dad_2[e] <=	-2167.92
EX_dcyt(e)	Exchange/demand reaction	dcyt[e] <=	-5407.28
EX_duri(e)	Exchange/demand reaction	duri[e] <=>	-3799.29
EX_fol(e)	Exchange/demand reaction	fol[e] <=	-1616.1
EX_fuc_L(e)	Exchange/demand reaction	fuc_L[e] <=>	1588.56
EX_gsn(e)	Exchange/demand reaction	gsn[e] <=	-1781.55
EX_h2o(e)	Exchange/demand reaction	h2o[e] <=>	1589.87
EX_ins(e)	Exchange/demand reaction	ins[e] <=	1478.75
EX_leuktrE4(e)	Exchange/demand reaction	leuktrE4[e] <=>	-2338.51
EX_lys_L(e)	Exchange/demand reaction	lys_L[e] <=>	1600.45
EX_ncam(e)	Exchange/demand reaction	ncam[e] <=>	1674
EX_pi(e)	Exchange/demand reaction	pi[e] <=>	2278.64
EX_retn(e)	Exchange/demand reaction	retn[e] <=>	1739.44
EX_tag_hs(e)	Exchange/demand reaction	tag_hs[e] <=>	-1737.44
EX_ura(e)	Exchange/demand reaction	ura[e] <=>	-3947.4
EX_urate(e)	Exchange/demand reaction	urate[e] <=>	-3650.69
EX_uri(e)	Exchange/demand reaction	uri[e] <=>	-1760.86
EX_sbt-d(e)	Exchange/demand reaction	sbt_D[e] <=	4973.57
EX_acetone(e)	Exchange/demand reaction	acetone[e] <=>	2266.61
EX_thf(e)	Exchange/demand reaction	thf[e] <=>	-5712.49
FACOAL224	Fatty acid oxidation	atp[c] + coa[c] + adrn[c] -> amp[c] + ppi[c] + adrncoa[c]	1498.38
r1449	Fatty acid oxidation	q10[m] + tdcoa[m] -> q10h2[m] + HC01412[m]	-1525.75
C204CPT1	Fatty acid oxidation	crn[c] + arachdcoa[c] -> coa[c] + arachdcrn[c]	1501.94
FAOXC183806x	Fatty acid oxidation	5 nad[x] + 5 coa[x] + 2 o2[x] + 5 h2o[x] + lnlncgcoa[x] -> 5 h[x] + 5 nadh[x] + 5 accoa[x] + occoa[x] + 2 h2o2[x]	-2189.95
FAOXC2252053x	Fatty acid oxidation	nad[x] + coa[x] + o2[x] + h2o[x] + dcsptn1coa[x] -> h[x] + nadh[x] + accoa[x] + h2o2[x] + tmndnccoa[x]	-2154.91
FAS180COA	Fatty acid synthesis	3 h[c] + 2 nadph[c] + malcoa[c] + pmtcoa[c] -> h2o[c] + 2 nadp[c] + co2[c] + coa[c] + stcoa[c]	-1423.45
FTHFL	Folate metabolism	atp[c] + 3 h[c] + thf[c] + for[c] -> 10fthf[c] + adp[c] + pi[c]	-6294.75
MTHFD	Folate metabolism	nadp[c] + mlthf[c] <=> nadph[c] + methf[c]	-8588.59
MTHFR3	Folate metabolism	2 h[c] + nadph[c] + mlthf[c] -> nadp[c] + 5mthf[c]	-9810.47
MTHFD2m	Folate metabolism	nad[m] + mlthf[m] <=> nadh[m] + methf[m]	-7880.23
MTHFDm	Folate metabolism	nadp[m] + mlthf[m] <=> nadph[m] + methf[m]	-6949.27
MTHFD2	Folate metabolism	nad[c] + mlthf[c] <=> nadh[c] + methf[c]	-9696.89
SBTR	Fructose and mannose metabolism	h[c] + nadph[c] + glc_D[c] -> nadp[c] + sbt_D[c]	-5519.26
RE1342C	Fructose and mannose metabolism	nad[c] + sbt_D[c] <=> h[c] + nadh[c] + glc_D[c]	4410.96
HEX7	Fructose and mannose metabolism	atp[c] + 2 h[c] + fru[c] -> adp[c] + f6p[c]	6138.68
r0357	Fructose and mannose metabolism	itp[c] + fru[c] -> h[c] + idp[c] + f6p[c]	5868.84
GLNS	Glutamate metabolism	nh4[c] + atp[c] + 2 h[c] + glu_L[c] -> adp[c] + pi[c] + gln_L[c]	-1708.52
GLUCYS	Glutathione metabolism	atp[c] + 2 h[c] + glu_L[c] + cys_L[c] -> adp[c] + pi[c] + glucys[c]	1634.14
DAGK_hs	Glycerophospholipid metabolism	atp[c] + 2 h[c] + dag_hs[c] <=> adp[c] + pa_hs[c]	1774.85
G3PD1	Glycerophospholipid metabolism	nad[c] + glyc3p[c] <=> h[c] + nadh[c] + dhap[c]	-3093.53
ACS	Glycolysis/gluconeogenesis	atp[c] + coa[c] + ac[c] -> amp[c] + ppi[c] + accoa[c]	-1795.13
FBP	Glycolysis/gluconeogenesis	h2o[c] + fdp[c] -> pi[c] + f6p[c]	6983.44
G6PPer	Glycolysis/gluconeogenesis	h2o[r] + g6p[r] -> glc_D[r] + pi[r]	-2264.87
HEX1	Glycolysis/gluconeogenesis	atp[c] + 2 h[c] + glc_D[c] -> adp[c] + g6p[c]	3747.92
PFK	Glycolysis/gluconeogenesis	atp[c] + 2 h[c] + f6p[c] -> adp[c] + fdp[c]	-6154.24
PGM	Glycolysis/gluconeogenesis	2pg[c] <=> 3pg[c]	-2816.51
PYK	Glycolysis/gluconeogenesis	adp[c] + pep[c] -> atp[c] + 2 h[c] + pyr[c]	-1634.22
PEPCK	Glycolysis/gluconeogenesis	oaa[c] + gtp[c] -> co2[c] + pep[c] + gdp[c]	-1686.04
PGI	Glycolysis/gluconeogenesis	g6p[c] <=> f6p[c]	-2018.24
SULFOX	Methionine and cysteine metabolism	h2o[c] + so3[c] + 2 ficytC[m] -> 2 h[c] + 2 focytC[m] + so4[c]	-1453.46
NMNATn	NAD metabolism	atp[n] + h[n] + nmn[n] -> ppi[n] + nad[n]	-1637.13
r0391	NAD metabolism	ppi[c] + nicrnt[c] <=> h[c] + prpp[c] + nac[c]	3065.28
RNMK	NAD metabolism	atp[c] + 2 h[c] + rnam[c] -> adp[c] + nmn[c]	3882.29
CTPS1	Nucleotide interconversion	nh4[c] + atp[c] + h[c] + utp[c] -> adp[c] + pi[c] + ctp[c]	-2525.11
CYTK4	Nucleotide interconversion	gtp[c] + dcmp[c] <=> gdp[c] + dcdp[c]	-4949.11
GK1	Nucleotide interconversion	atp[c] + 3 h[c] + gmp[c] <=> adp[c] + gdp[c]	-2167.48
NDPK1	Nucleotide interconversion	atp[c] + 3 h[c] + gdp[c] <=> adp[c] + gtp[c]	4441.14
NDPK1m	Nucleotide interconversion	atp[m] + gdp[m] <=> h[m] + adp[m] + gtp[m]	-2797.96
NDPK2	Nucleotide interconversion	atp[c] + 3 h[c] + udp[c] <=> adp[c] + utp[c]	-2159.12
NDPK5m	Nucleotide interconversion	atp[m] + dgdp[m] -> h[m] + adp[m] + dgtp[m]	-1753.69
NDPK6	Nucleotide interconversion	atp[c] + 3 h[c] + dudp[c] <=> adp[c] + dutp[c]	2058.43
NDPK7	Nucleotide interconversion	atp[c] + 3 h[c] + dcdp[c] <=> adp[c] + dctp[c]	6138.72
NDPK8	Nucleotide interconversion	atp[c] + 3 h[c] + dadp[c] <=> adp[c] + datp[c]	6138.72
NTD7	Nucleotide interconversion	h2o[c] + amp[c] -> pi[c] + adn[c]	-4628.62
TMDK1	Nucleotide interconversion	atp[c] + 2 h[c] + thymd[c] -> adp[c] + dtmp[c]	8283.21
TRDR	Nucleotide interconversion	h[c] + nadph[c] + trdox[c] -> nadp[c] + trdrd[c]	-1843.89
r0395	Nucleotide interconversion	h2o[c] + o2[c] + hxan[c] -> h2o2[c] + xan[c]	3588.7
ADNK1	Nucleotide interconversion	atp[c] + 2 h[c] + adn[c] -> adp[c] + amp[c]	5445.61
CYTK1	Nucleotide interconversion	atp[c] + 3 h[c] + cmp[c] <=> adp[c] + cdp[c]	3820
CYTK10	Nucleotide interconversion	cmp[c] + dgtp[c] <=> cdp[c] + dgdp[c]	4327.97
CYTK12	Nucleotide interconversion	dcmp[c] + dctp[c] <=> 2 dcdp[c]	-6646.69
CYTK13	Nucleotide interconversion	datp[c] + dcmp[c] <=> dadp[c] + dcdp[c]	-6646.7
CYTK14	Nucleotide interconversion	utp[c] + dcmp[c] <=> udp[c] + dcdp[c]	1651.15
CYTK6	Nucleotide interconversion	cmp[c] + ctp[c] <=> 2 cdp[c]	4327.97
CYTK7	Nucleotide interconversion	cmp[c] + utp[c] <=> udp[c] + cdp[c]	5979.12
CYTK8	Nucleotide interconversion	datp[c] + cmp[c] <=> dadp[c] + cdp[c]	-2318.72
CYTK9	Nucleotide interconversion	cmp[c] + dctp[c] <=> cdp[c] + dcdp[c]	-2318.72
UMPK	Nucleotide interconversion	atp[c] + 3 h[c] + ump[c] <=> adp[c] + udp[c]	6138.72
UMPK2	Nucleotide interconversion	ctp[c] + ump[c] <=> udp[c] + cdp[c]	6646.7
UMPK3	Nucleotide interconversion	utp[c] + ump[c] <=> 2 udp[c]	8297.85
UMPK4	Nucleotide interconversion	gtp[c] + ump[c] <=> udp[c] + gdp[c]	1697.58
UMPK7	Nucleotide interconversion	dgtp[c] + ump[c] <=> udp[c] + dgdp[c]	6646.7
RNDR4	Nucleotide interconversion	udp[c] + trdrd[c] -> h2o[c] + dudp[c] + trdox[c]	-4217.55
DURIK1m	Nucleotide interconversion	atp[m] + duri[m] -> 2 h[m] + adp[m] + dump[m]	-1750.65
NTD5m	Nucleotide interconversion	h2o[m] + dtmp[m] -> pi[m] + thymd[m]	-1744.39
ADPT	Nucleotide salvage pathway	ade[c] + prpp[c] -> amp[c] + ppi[c]	1562.92
GUAPRT	Nucleotide salvage pathway	prpp[c] + gua[c] -> ppi[c] + gmp[c]	-4702.85
PPM	Pentose phosphate pathway	r1p[c] <=> r5p[c]	2177.63
AACOAT	Propanoate metabolism	atp[c] + coa[c] + acac[c] -> aacoa[c] + amp[c] + ppi[c]	-4256.69
ACS2	Propanoate metabolism	atp[c] + coa[c] + ppa[c] -> amp[c] + ppi[c] + ppcoa[c]	-1580.08
NTD11	Purine catabolism	h2o[c] + imp[c] -> pi[c] + ins[c]	-3635.46
PUNP3	Purine catabolism	pi[c] + gsn[c] <=> gua[c] + r1p[c]	1637.55
PUNP4	Purine catabolism	pi[c] + dgsn[c] <=> 2dr1p[c] + gua[c]	5457.69
r0028	Purine catabolism	h2o[c] + adp[c] -> 4 h[c] + pi[c] + amp[c]	-2345.33
ADNK4	Purine synthesis	adn[c] + dgtp[c] -> h[c] + amp[c] + dgdp[c]	5953.72
INSK	Purine synthesis	atp[c] + 2 h[c] + ins[c] -> adp[c] + imp[c]	4453.2
CYTD	Pyrimidine catabolism	h2o[c] + h[c] + cytd[c] -> nh4[c] + uri[c]	2673.99
NTD5	Pyrimidine catabolism	h2o[c] + dtmp[c] -> pi[c] + thymd[c]	-7466.36
RE2954C	Pyrimidine synthesis	h[c] + pep[c] + dtdp[c] <=> pyr[c] + dttp[c]	-1634.28
MGSA	Pyruvate metabolism	dhap[c] -> pi[c] + mthgxl[c]	1537.16
MGSA2	Pyruvate metabolism	g3p[c] -> pi[c] + mthgxl[c]	1537.17
ARTCOAL2	R group synthesis	h2o[c] + Rtotal2coa[c] -> h[c] + coa[c] + Rtotal2[c]	-2216.65
SLCBK1	Sphingolipid metabolism	atp[c] + 2 h[c] + sphgn[c] -> adp[c] + sph1p[c]	1480.56
DHPR	Tetrahydrobiopterin metabolism	h[c] + nadh[c] + dhbpt[c] -> nad[c] + thbpt[c]	-9368.57
r0398	Tetrahydrobiopterin metabolism	h[c] + nadph[c] + dhbpt[c] -> nadp[c] + thbpt[c]	-2592.41
THBPT4ACAMDASE	Tetrahydrobiopterin metabolism	thbpt4acam[c] -> h2o[c] + dhbpt[c]	14875.5
D_LACt2	Transport, extracellular	h[e] + lac_D[e] <=> h[c] + lac_D[c]	-1794.6
GALt1r	Transport, extracellular	gal[e] <=> gal[c]	3442.47
GLYt4	Transport, extracellular	na1[e] + gly[e] -> na1[c] + gly[c]	-1421.2
GUAt	Transport, extracellular	gua[e] <=> gua[c]	5605.69
HOMt4	Transport, extracellular	na1[e] + hom_L[e] -> na1[c] + hom_L[c]	-1421.19
ILEtec	Transport, extracellular	ile_L[e] <=> ile_L[c]	2110.86
LEUKTRF4t	Transport, extracellular	leuktrF4[e] <=> leuktrF4[c]	3812.86
LEUt4	Transport, extracellular	na1[e] + leu_L[e] -> na1[c] + leu_L[c]	2196.66
LEUtec	Transport, extracellular	leu_L[e] <=> leu_L[c]	2153.79
METt4	Transport, extracellular	na1[e] + met_L[e] -> na1[c] + met_L[c]	-1421.08
METtec	Transport, extracellular	met_L[e] <=> met_L[c]	-1463.96
ORNtiDF	Transport, extracellular	orn[e] -> orn[c]	2153.7
PPAt	Transport, extracellular	ppa[e] -> ppa[c]	1800.88
PROt4	Transport, extracellular	na1[e] + pro_L[e] -> na1[c] + pro_L[c]	2196.59
RETt	Transport, extracellular	retinol[e] -> retinol[c]	-1889.51
RTOTALt	Transport, extracellular	Rtotal[e] <=> Rtotal[c]	1784
THRt4	Transport, extracellular	na1[e] + thr_L[e] -> na1[c] + thr_L[c]	2210.41
VALtec	Transport, extracellular	val_L[e] <=> val_L[c]	-1464.05
r1666	Transport, extracellular	lys_L[e] + citr_L[c] <=> lys_L[c] + citr_L[e]	-2196.7
r1669	Transport, extracellular	arg_L[e] + citr_L[c] <=> arg_L[c] + citr_L[e]	-2196.52
r1676	Transport, extracellular	na1[e] + gly[e] + trp_L[c] -> na1[c] + gly[c] + trp_L[e]	-3532.12
r1678	Transport, extracellular	na1[e] + gly[e] + tyr_L[c] -> na1[c] + gly[c] + tyr_L[e]	-3532.08
r1679	Transport, extracellular	na1[e] + cys_L[c] + gly[e] -> na1[c] + cys_L[e] + gly[c]	-2776.62
r1680	Transport, extracellular	na1[e] + gly[e] + leu_L[c] -> na1[c] + gly[c] + leu_L[e]	-3574.83
r1681	Transport, extracellular	na1[e] + gly[e] + pro_L[c] -> na1[c] + gly[c] + pro_L[e]	-3574.9
r1684	Transport, extracellular	na1[e] + gly[e] + thr_L[c] -> na1[c] + gly[c] + thr_L[e]	-3588.67
r1686	Transport, extracellular	na1[e] + gly[e] + ile_L[c] -> na1[c] + gly[c] + ile_L[e]	-3532.03
r1691	Transport, extracellular	na1[e] + ala_L[e] + trp_L[c] -> na1[c] + ala_L[c] + trp_L[e]	-3489.28
r1693	Transport, extracellular	na1[e] + ala_L[e] + tyr_L[c] -> na1[c] + ala_L[c] + tyr_L[e]	-3489.21
r1695	Transport, extracellular	na1[e] + ala_L[e] + leu_L[c] -> na1[c] + ala_L[c] + leu_L[e]	-3532.05
r1696	Transport, extracellular	na1[e] + ala_L[e] + pro_L[c] -> na1[c] + ala_L[c] + pro_L[e]	-3531.97
r1701	Transport, extracellular	na1[e] + ala_L[e] + ile_L[c] -> na1[c] + ala_L[c] + ile_L[e]	-3489.16
r1706	Transport, extracellular	na1[e] + gln_L[e] + trp_L[c] -> na1[c] + gln_L[c] + trp_L[e]	-2346.1
r1708	Transport, extracellular	na1[e] + gln_L[e] + tyr_L[c] -> na1[c] + gln_L[c] + tyr_L[e]	-2346.07
r1710	Transport, extracellular	na1[e] + gln_L[e] + leu_L[c] -> na1[c] + gln_L[c] + leu_L[e]	-2388.95
r1711	Transport, extracellular	na1[e] + gln_L[e] + pro_L[c] -> na1[c] + gln_L[c] + pro_L[e]	-2388.83
r1716	Transport, extracellular	na1[e] + gln_L[e] + ile_L[c] -> na1[c] + gln_L[c] + ile_L[e]	-2346
r1721	Transport, extracellular	na1[e] + ser_L[e] + trp_L[c] -> na1[c] + ser_L[c] + trp_L[e]	-3489.35
r1723	Transport, extracellular	na1[e] + ser_L[e] + tyr_L[c] -> na1[c] + ser_L[c] + tyr_L[e]	-3489.27
r1725	Transport, extracellular	na1[e] + ser_L[e] + leu_L[c] -> na1[c] + ser_L[c] + leu_L[e]	-3532.11
r1726	Transport, extracellular	na1[e] + ser_L[e] + pro_L[c] -> na1[c] + ser_L[c] + pro_L[e]	-3532
r1731	Transport, extracellular	na1[e] + ser_L[e] + ile_L[c] -> na1[c] + ser_L[c] + ile_L[e]	-3489.21
r1736	Transport, extracellular	na1[e] + met_L[e] + trp_L[c] -> na1[c] + met_L[c] + trp_L[e]	-3532
r1738	Transport, extracellular	na1[e] + met_L[e] + tyr_L[c] -> na1[c] + met_L[c] + tyr_L[e]	-3531.98
r1739	Transport, extracellular	na1[e] + cys_L[c] + met_L[e] -> na1[c] + cys_L[e] + met_L[c]	-2776.55
r1740	Transport, extracellular	na1[e] + met_L[e] + leu_L[c] -> na1[c] + met_L[c] + leu_L[e]	-3574.79
r1741	Transport, extracellular	na1[e] + met_L[e] + pro_L[c] -> na1[c] + met_L[c] + pro_L[e]	-3574.68
r1744	Transport, extracellular	na1[e] + thr_L[c] + met_L[e] -> na1[c] + thr_L[e] + met_L[c]	-3588.65
r1746	Transport, extracellular	na1[e] + met_L[e] + ile_L[c] -> na1[c] + met_L[c] + ile_L[e]	-3531.99
r1747	Transport, extracellular	na1[e] + gly[c] + trp_L[e] -> na1[c] + gly[e] + trp_L[c]	3617.89
r1748	Transport, extracellular	na1[e] + ala_L[c] + trp_L[e] -> na1[c] + ala_L[e] + trp_L[c]	3574.95
r1749	Transport, extracellular	na1[e] + gln_L[c] + trp_L[e] -> na1[c] + gln_L[e] + trp_L[c]	2431.89
r1750	Transport, extracellular	na1[e] + ser_L[c] + trp_L[e] -> na1[c] + ser_L[e] + trp_L[c]	3575.07
r1751	Transport, extracellular	na1[e] + met_L[c] + trp_L[e] -> na1[c] + met_L[e] + trp_L[c]	3617.76
r1752	Transport, extracellular	na1[e] + trp_L[e] + phe_L[c] -> na1[c] + phe_L[e] + trp_L[c]	3575
r1757	Transport, extracellular	na1[e] + asn_L[c] + trp_L[e] -> na1[c] + asn_L[e] + trp_L[c]	3574.93
r1758	Transport, extracellular	na1[e] + trp_L[e] + val_L[c] -> na1[c] + val_L[e] + trp_L[c]	3617.91
r1760	Transport, extracellular	na1[e] + trp_L[e] + hom_L[c] -> na1[c] + hom_L[e] + trp_L[c]	3617.94
r1767	Transport, extracellular	na1[e] + phe_L[e] + trp_L[c] -> na1[c] + trp_L[e] + phe_L[c]	-3489.29
r1768	Transport, extracellular	na1[e] + phe_L[e] + tyr_L[c] -> na1[c] + tyr_L[e] + phe_L[c]	-3489.2
r1769	Transport, extracellular	na1[e] + cys_L[c] + phe_L[e] -> na1[c] + cys_L[e] + phe_L[c]	-2733.71
r1770	Transport, extracellular	na1[e] + phe_L[e] + leu_L[c] -> na1[c] + leu_L[e] + phe_L[c]	-3532.11
r1771	Transport, extracellular	na1[e] + phe_L[e] + pro_L[c] -> na1[c] + pro_L[e] + phe_L[c]	-3532.01
r1774	Transport, extracellular	na1[e] + thr_L[c] + phe_L[e] -> na1[c] + thr_L[e] + phe_L[c]	-3545.83
r1776	Transport, extracellular	na1[e] + phe_L[e] + ile_L[c] -> na1[c] + ile_L[e] + phe_L[c]	-3489.14
r1777	Transport, extracellular	na1[e] + gly[c] + tyr_L[e] -> na1[c] + gly[e] + tyr_L[c]	3617.89
r1778	Transport, extracellular	na1[e] + ala_L[c] + tyr_L[e] -> na1[c] + ala_L[e] + tyr_L[c]	3575.01
r1779	Transport, extracellular	na1[e] + gln_L[c] + tyr_L[e] -> na1[c] + gln_L[e] + tyr_L[c]	2431.79
r1780	Transport, extracellular	na1[e] + ser_L[c] + tyr_L[e] -> na1[c] + ser_L[e] + tyr_L[c]	3575.06
r1781	Transport, extracellular	na1[e] + met_L[c] + tyr_L[e] -> na1[c] + met_L[e] + tyr_L[c]	3617.74
r1783	Transport, extracellular	na1[e] + tyr_L[e] + phe_L[c] -> na1[c] + phe_L[e] + tyr_L[c]	3574.95
r1787	Transport, extracellular	na1[e] + asn_L[c] + tyr_L[e] -> na1[c] + asn_L[e] + tyr_L[c]	3574.83
r1788	Transport, extracellular	na1[e] + tyr_L[e] + val_L[c] -> na1[c] + val_L[e] + tyr_L[c]	3617.82
r1790	Transport, extracellular	na1[e] + tyr_L[e] + hom_L[c] -> na1[c] + hom_L[e] + tyr_L[c]	3617.83
r1792	Transport, extracellular	na1[e] + cys_L[e] + gly[c] -> na1[c] + cys_L[c] + gly[e]	2862.36
r1796	Transport, extracellular	na1[e] + cys_L[e] + met_L[c] -> na1[c] + cys_L[c] + met_L[e]	2862.26
r1798	Transport, extracellular	na1[e] + cys_L[e] + phe_L[c] -> na1[c] + cys_L[c] + phe_L[e]	2819.44
r1803	Transport, extracellular	na1[e] + cys_L[e] + val_L[c] -> na1[c] + cys_L[c] + val_L[e]	2862.36
r1807	Transport, extracellular	na1[e] + gly[c] + leu_L[e] -> na1[c] + gly[e] + leu_L[c]	3660.71
r1808	Transport, extracellular	na1[e] + ala_L[c] + leu_L[e] -> na1[c] + ala_L[e] + leu_L[c]	3617.85
r1809	Transport, extracellular	na1[e] + gln_L[c] + leu_L[e] -> na1[c] + gln_L[e] + leu_L[c]	2474.67
r1810	Transport, extracellular	na1[e] + ser_L[c] + leu_L[e] -> na1[c] + ser_L[e] + leu_L[c]	3617.87
r1811	Transport, extracellular	na1[e] + met_L[c] + leu_L[e] -> na1[c] + met_L[e] + leu_L[c]	3660.62
r1813	Transport, extracellular	na1[e] + leu_L[e] + phe_L[c] -> na1[c] + phe_L[e] + leu_L[c]	3617.81
r1817	Transport, extracellular	na1[e] + asn_L[c] + leu_L[e] -> na1[c] + asn_L[e] + leu_L[c]	3617.77
r1818	Transport, extracellular	na1[e] + leu_L[e] + val_L[c] -> na1[c] + val_L[e] + leu_L[c]	3660.71
r1822	Transport, extracellular	na1[e] + gly[c] + pro_L[e] -> na1[c] + gly[e] + pro_L[c]	3660.61
r1823	Transport, extracellular	na1[e] + ala_L[c] + pro_L[e] -> na1[c] + ala_L[e] + pro_L[c]	3617.76
r1824	Transport, extracellular	na1[e] + gln_L[c] + pro_L[e] -> na1[c] + gln_L[e] + pro_L[c]	2474.59
r1825	Transport, extracellular	na1[e] + ser_L[c] + pro_L[e] -> na1[c] + ser_L[e] + pro_L[c]	3617.85
r1826	Transport, extracellular	na1[e] + met_L[c] + pro_L[e] -> na1[c] + met_L[e] + pro_L[c]	3660.56
r1828	Transport, extracellular	na1[e] + pro_L[e] + phe_L[c] -> na1[c] + phe_L[e] + pro_L[c]	3617.76
r1832	Transport, extracellular	na1[e] + asn_L[c] + pro_L[e] -> na1[c] + asn_L[e] + pro_L[c]	3617.69
r1833	Transport, extracellular	na1[e] + pro_L[e] + val_L[c] -> na1[c] + val_L[e] + pro_L[c]	3660.66
r1835	Transport, extracellular	na1[e] + pro_L[e] + hom_L[c] -> na1[c] + hom_L[e] + pro_L[c]	3660.62
r1842	Transport, extracellular	na1[e] + asn_L[e] + trp_L[c] -> na1[c] + asn_L[c] + trp_L[e]	-3489.19
r1844	Transport, extracellular	na1[e] + asn_L[e] + tyr_L[c] -> na1[c] + asn_L[c] + tyr_L[e]	-3489.16
r1846	Transport, extracellular	na1[e] + asn_L[e] + leu_L[c] -> na1[c] + asn_L[c] + leu_L[e]	-3532.01
r1847	Transport, extracellular	na1[e] + asn_L[e] + pro_L[c] -> na1[c] + asn_L[c] + pro_L[e]	-3531.93
r1851	Transport, extracellular	na1[e] + asn_L[e] + ile_L[c] -> na1[c] + asn_L[c] + ile_L[e]	-3489.08
r1857	Transport, extracellular	na1[e] + val_L[e] + trp_L[c] -> na1[c] + trp_L[e] + val_L[c]	-3532.14
r1859	Transport, extracellular	na1[e] + val_L[e] + tyr_L[c] -> na1[c] + tyr_L[e] + val_L[c]	-3532.05
r1860	Transport, extracellular	na1[e] + cys_L[c] + val_L[e] -> na1[c] + cys_L[e] + val_L[c]	-2776.61
r1861	Transport, extracellular	na1[e] + val_L[e] + leu_L[c] -> na1[c] + leu_L[e] + val_L[c]	-3574.97
r1862	Transport, extracellular	na1[e] + val_L[e] + pro_L[c] -> na1[c] + pro_L[e] + val_L[c]	-3575.11
r1864	Transport, extracellular	na1[e] + thr_L[c] + val_L[e] -> na1[c] + thr_L[e] + val_L[c]	-3588.68
r1866	Transport, extracellular	na1[e] + val_L[e] + ile_L[c] -> na1[c] + ile_L[e] + val_L[c]	-3532.06
r1867	Transport, extracellular	na1[e] + gly[c] + thr_L[e] -> na1[c] + gly[e] + thr_L[c]	3674.47
r1871	Transport, extracellular	na1[e] + thr_L[e] + met_L[c] -> na1[c] + thr_L[c] + met_L[e]	3674.34
r1873	Transport, extracellular	na1[e] + thr_L[e] + phe_L[c] -> na1[c] + thr_L[c] + phe_L[e]	3631.65
r1879	Transport, extracellular	na1[e] + thr_L[e] + val_L[c] -> na1[c] + thr_L[c] + val_L[e]	3674.51
r1880	Transport, extracellular	na1[e] + thr_L[e] + hom_L[c] -> na1[c] + thr_L[c] + hom_L[e]	3674.51
r1887	Transport, extracellular	na1[e] + hom_L[e] + trp_L[c] -> na1[c] + trp_L[e] + hom_L[c]	-3532.21
r1889	Transport, extracellular	na1[e] + hom_L[e] + tyr_L[c] -> na1[c] + tyr_L[e] + hom_L[c]	-3532.07
r1890	Transport, extracellular	na1[e] + cys_L[c] + hom_L[e] -> na1[c] + cys_L[e] + hom_L[c]	-2776.59
r1891	Transport, extracellular	na1[e] + hom_L[e] + leu_L[c] -> na1[c] + leu_L[e] + hom_L[c]	-3574.91
r1892	Transport, extracellular	na1[e] + hom_L[e] + pro_L[c] -> na1[c] + pro_L[e] + hom_L[c]	-3574.83
r1895	Transport, extracellular	na1[e] + thr_L[c] + hom_L[e] -> na1[c] + thr_L[e] + hom_L[c]	-3588.75
r1896	Transport, extracellular	na1[e] + hom_L[e] + ile_L[c] -> na1[c] + ile_L[e] + hom_L[c]	-3532.05
r1897	Transport, extracellular	na1[e] + gly[c] + ile_L[e] -> na1[c] + gly[e] + ile_L[c]	3617.79
r1898	Transport, extracellular	na1[e] + ala_L[c] + ile_L[e] -> na1[c] + ala_L[e] + ile_L[c]	3574.91
r1899	Transport, extracellular	na1[e] + gln_L[c] + ile_L[e] -> na1[c] + gln_L[e] + ile_L[c]	2431.7
r1900	Transport, extracellular	na1[e] + ser_L[c] + ile_L[e] -> na1[c] + ser_L[e] + ile_L[c]	3574.94
r1901	Transport, extracellular	na1[e] + met_L[c] + ile_L[e] -> na1[c] + met_L[e] + ile_L[c]	3617.66
r1903	Transport, extracellular	na1[e] + ile_L[e] + phe_L[c] -> na1[c] + phe_L[e] + ile_L[c]	3574.89
r1908	Transport, extracellular	na1[e] + asn_L[c] + ile_L[e] -> na1[c] + asn_L[e] + ile_L[c]	3574.8
r1909	Transport, extracellular	na1[e] + ile_L[e] + val_L[c] -> na1[c] + val_L[e] + ile_L[c]	3617.8
r1911	Transport, extracellular	na1[e] + ile_L[e] + hom_L[c] -> na1[c] + hom_L[e] + ile_L[c]	3617.75
r1914	Transport, extracellular	na1[e] + orn[c] + gly[e] -> na1[c] + gly[c] + orn[e]	-3574.87
r1916	Transport, extracellular	na1[e] + gly[e] + citr_L[c] -> na1[c] + gly[c] + citr_L[e]	-3574.89
r1919	Transport, extracellular	na1[e] + orn[c] + ala_L[e] -> na1[c] + ala_L[c] + orn[e]	-3532
r1921	Transport, extracellular	na1[e] + ala_L[e] + citr_L[c] -> na1[c] + ala_L[c] + citr_L[e]	-3532.02
r1924	Transport, extracellular	na1[e] + orn[c] + gln_L[e] -> na1[c] + gln_L[c] + orn[e]	-2388.83
r1926	Transport, extracellular	na1[e] + gln_L[e] + citr_L[c] -> na1[c] + gln_L[c] + citr_L[e]	-2388.86
r1929	Transport, extracellular	na1[e] + orn[c] + ser_L[e] -> na1[c] + ser_L[c] + orn[e]	-3532.04
r1931	Transport, extracellular	na1[e] + ser_L[e] + citr_L[c] -> na1[c] + ser_L[c] + citr_L[e]	-3532.06
r1934	Transport, extracellular	na1[e] + orn[c] + met_L[e] -> na1[c] + met_L[c] + orn[e]	-3574.78
r1936	Transport, extracellular	na1[e] + citr_L[c] + met_L[e] -> na1[c] + met_L[c] + citr_L[e]	-3574.8
r1937	Transport, extracellular	na1[e] + lys_L[c] + trp_L[e] -> na1[c] + lys_L[e] + trp_L[c]	2196.84
r1938	Transport, extracellular	na1[e] + arg_L[c] + trp_L[e] -> na1[c] + arg_L[e] + trp_L[c]	2196.65
r1940	Transport, extracellular	na1[e] + trp_L[e] + his_L[c] -> na1[c] + his_L[e] + trp_L[c]	2196.72
r1944	Transport, extracellular	na1[e] + orn[c] + phe_L[e] -> na1[c] + orn[e] + phe_L[c]	-3531.98
r1946	Transport, extracellular	na1[e] + citr_L[c] + phe_L[e] -> na1[c] + phe_L[c] + citr_L[e]	-3532.01
r1947	Transport, extracellular	na1[e] + lys_L[c] + tyr_L[e] -> na1[c] + lys_L[e] + tyr_L[c]	2196.78
r1948	Transport, extracellular	na1[e] + arg_L[c] + tyr_L[e] -> na1[c] + arg_L[e] + tyr_L[c]	2196.58
r1950	Transport, extracellular	na1[e] + tyr_L[e] + his_L[c] -> na1[c] + his_L[e] + tyr_L[c]	2196.68
r1952	Transport, extracellular	na1[e] + cys_L[e] + lys_L[c] -> na1[c] + cys_L[c] + lys_L[e]	1441.29
r1953	Transport, extracellular	na1[e] + cys_L[e] + arg_L[c] -> na1[c] + cys_L[c] + arg_L[e]	1441.11
r1955	Transport, extracellular	na1[e] + cys_L[e] + his_L[c] -> na1[c] + cys_L[c] + his_L[e]	1441.19
r1957	Transport, extracellular	na1[e] + lys_L[c] + leu_L[e] -> na1[c] + lys_L[e] + leu_L[c]	2239.64
r1958	Transport, extracellular	na1[e] + arg_L[c] + leu_L[e] -> na1[c] + arg_L[e] + leu_L[c]	2239.47
r1960	Transport, extracellular	na1[e] + leu_L[e] + his_L[c] -> na1[c] + his_L[e] + leu_L[c]	2239.54
r1962	Transport, extracellular	na1[e] + lys_L[c] + pro_L[e] -> na1[c] + lys_L[e] + pro_L[c]	2239.58
r1963	Transport, extracellular	na1[e] + arg_L[c] + pro_L[e] -> na1[c] + arg_L[e] + pro_L[c]	2239.39
r1965	Transport, extracellular	na1[e] + pro_L[e] + his_L[c] -> na1[c] + his_L[e] + pro_L[c]	2239.47
r1969	Transport, extracellular	na1[e] + orn[c] + asn_L[e] -> na1[c] + asn_L[c] + orn[e]	-3531.92
r1971	Transport, extracellular	na1[e] + asn_L[e] + citr_L[c] -> na1[c] + asn_L[c] + citr_L[e]	-3531.94
r1974	Transport, extracellular	na1[e] + orn[c] + val_L[e] -> na1[c] + orn[e] + val_L[c]	-3574.88
r1976	Transport, extracellular	na1[e] + citr_L[c] + val_L[e] -> na1[c] + citr_L[e] + val_L[c]	-3574.91
r1977	Transport, extracellular	na1[e] + thr_L[e] + lys_L[c] -> na1[c] + thr_L[c] + lys_L[e]	2253.39
r1978	Transport, extracellular	na1[e] + thr_L[e] + arg_L[c] -> na1[c] + thr_L[c] + arg_L[e]	2253.21
r1980	Transport, extracellular	na1[e] + thr_L[e] + his_L[c] -> na1[c] + thr_L[c] + his_L[e]	2253.3
r1984	Transport, extracellular	na1[e] + orn[c] + hom_L[e] -> na1[c] + orn[e] + hom_L[c]	-3574.87
r1986	Transport, extracellular	na1[e] + citr_L[c] + hom_L[e] -> na1[c] + hom_L[c] + citr_L[e]	-3574.9
r1987	Transport, extracellular	na1[e] + lys_L[c] + ile_L[e] -> na1[c] + lys_L[e] + ile_L[c]	2196.72
r1988	Transport, extracellular	na1[e] + arg_L[c] + ile_L[e] -> na1[c] + arg_L[e] + ile_L[c]	2196.54
r1990	Transport, extracellular	na1[e] + ile_L[e] + his_L[c] -> na1[c] + his_L[e] + ile_L[c]	2196.61
r1997	Transport, extracellular	lys_L[e] + trp_L[c] -> lys_L[c] + trp_L[e]	-2153.96
r1999	Transport, extracellular	lys_L[e] + tyr_L[c] -> lys_L[c] + tyr_L[e]	-2153.89
r2001	Transport, extracellular	lys_L[e] + leu_L[c] -> lys_L[c] + leu_L[e]	-2196.77
r2002	Transport, extracellular	lys_L[e] + pro_L[c] -> lys_L[c] + pro_L[e]	-2196.71
r2004	Transport, extracellular	lys_L[e] + val_L[c] -> lys_L[c] + val_L[e]	1421.07
r2005	Transport, extracellular	thr_L[c] + lys_L[e] -> thr_L[e] + lys_L[c]	-2210.52
r2007	Transport, extracellular	lys_L[e] + ile_L[c] -> lys_L[c] + ile_L[e]	-2153.86
r2008	Transport, extracellular	gly[c] + arg_L[e] -> gly[e] + arg_L[c]	1421.25
r2012	Transport, extracellular	arg_L[e] + met_L[c] -> arg_L[c] + met_L[e]	1421.16
r2013	Transport, extracellular	arg_L[e] + trp_L[c] -> arg_L[c] + trp_L[e]	-2153.77
r2015	Transport, extracellular	arg_L[e] + tyr_L[c] -> arg_L[c] + tyr_L[e]	-2153.72
r2017	Transport, extracellular	arg_L[e] + leu_L[c] -> arg_L[c] + leu_L[e]	-2196.59
r2018	Transport, extracellular	arg_L[e] + pro_L[c] -> arg_L[c] + pro_L[e]	-2196.52
r2020	Transport, extracellular	arg_L[e] + val_L[c] -> arg_L[c] + val_L[e]	1421.25
r2021	Transport, extracellular	thr_L[c] + arg_L[e] -> thr_L[e] + arg_L[c]	-2210.34
r2022	Transport, extracellular	arg_L[e] + hom_L[c] -> arg_L[c] + hom_L[e]	1421.25
r2023	Transport, extracellular	arg_L[e] + ile_L[c] -> arg_L[c] + ile_L[e]	-2153.66
r2024	Transport, extracellular	gly[c] + orn[e] -> orn[c] + gly[e]	3617.75
r2026	Transport, extracellular	gln_L[c] + orn[e] -> orn[c] + gln_L[e]	2431.72
r2027	Transport, extracellular	ser_L[c] + orn[e] -> orn[c] + ser_L[e]	3574.92
r2028	Transport, extracellular	met_L[c] + orn[e] -> orn[c] + met_L[e]	3617.66
r2030	Transport, extracellular	orn[e] + phe_L[c] -> orn[c] + phe_L[e]	3574.87
r2035	Transport, extracellular	asn_L[c] + orn[e] -> orn[c] + asn_L[e]	3574.79
r2036	Transport, extracellular	orn[e] + val_L[c] -> orn[c] + val_L[e]	3617.75
r2038	Transport, extracellular	orn[e] + hom_L[c] -> orn[c] + hom_L[e]	3617.75
r2040	Transport, extracellular	gly[c] + his_L[e] -> gly[e] + his_L[c]	1421.17
r2044	Transport, extracellular	met_L[c] + his_L[e] -> met_L[e] + his_L[c]	1421.07
r2045	Transport, extracellular	his_L[e] + trp_L[c] -> trp_L[e] + his_L[c]	-2153.85
r2047	Transport, extracellular	his_L[e] + tyr_L[c] -> tyr_L[e] + his_L[c]	-2153.8
r2049	Transport, extracellular	his_L[e] + leu_L[c] -> leu_L[e] + his_L[c]	-2196.67
r2050	Transport, extracellular	his_L[e] + pro_L[c] -> pro_L[e] + his_L[c]	-2196.6
r2052	Transport, extracellular	his_L[e] + val_L[c] -> val_L[e] + his_L[c]	1421.17
r2053	Transport, extracellular	thr_L[c] + his_L[e] -> thr_L[e] + his_L[c]	-2210.42
r2054	Transport, extracellular	his_L[e] + hom_L[c] -> hom_L[e] + his_L[c]	1421.17
r2055	Transport, extracellular	his_L[e] + ile_L[c] -> ile_L[e] + his_L[c]	-2153.75
r2056	Transport, extracellular	gly[c] + citr_L[e] -> gly[e] + citr_L[c]	3617.77
r2057	Transport, extracellular	ala_L[c] + citr_L[e] -> ala_L[e] + citr_L[c]	3574.9
r2058	Transport, extracellular	gln_L[c] + citr_L[e] -> gln_L[e] + citr_L[c]	2431.74
r2059	Transport, extracellular	ser_L[c] + citr_L[e] -> ser_L[e] + citr_L[c]	3574.93
r2060	Transport, extracellular	met_L[c] + citr_L[e] -> citr_L[c] + met_L[e]	3617.67
r2062	Transport, extracellular	phe_L[c] + citr_L[e] -> citr_L[c] + phe_L[e]	3574.87
r2067	Transport, extracellular	asn_L[c] + citr_L[e] -> asn_L[e] + citr_L[c]	3574.82
r2068	Transport, extracellular	citr_L[e] + val_L[c] -> citr_L[c] + val_L[e]	3617.76
r2070	Transport, extracellular	hom_L[c] + citr_L[e] -> citr_L[c] + hom_L[e]	3617.76
THRGLNexR	Transport, extracellular	gln_L[c] + thr_L[e] <=> gln_L[e] + thr_L[c]	2445.55
ALACYSNaEx	Transport, extracellular	na1[e] + ala_L[e] + cys_L[c] -> na1[c] + ala_L[c] + cys_L[e]	-2733.76
ALATHRNaEx	Transport, extracellular	na1[e] + ala_L[e] + thr_L[c] -> na1[c] + ala_L[c] + thr_L[e]	-3545.82
ASNCYSNaEx	Transport, extracellular	na1[e] + asn_L[e] + cys_L[c] -> na1[c] + asn_L[c] + cys_L[e]	-2733.63
ASNTHRNaEx	Transport, extracellular	na1[e] + asn_L[e] + thr_L[c] -> na1[c] + asn_L[c] + thr_L[e]	-3545.77
CYSALANaEx	Transport, extracellular	na1[e] + ala_L[c] + cys_L[e] -> na1[c] + ala_L[e] + cys_L[c]	2819.56
CYSASNNaEx	Transport, extracellular	na1[e] + asn_L[c] + cys_L[e] -> na1[c] + asn_L[e] + cys_L[c]	2819.43
CYSGLNNaEx	Transport, extracellular	na1[e] + cys_L[e] + gln_L[c] -> na1[c] + cys_L[c] + gln_L[e]	1676.35
CYSSERNaEx	Transport, extracellular	na1[e] + cys_L[e] + ser_L[c] -> na1[c] + cys_L[c] + ser_L[e]	2819.58
GLNCYSNaEx	Transport, extracellular	na1[e] + cys_L[c] + gln_L[e] -> na1[c] + cys_L[e] + gln_L[c]	-1590.57
GLNTHRNaEx	Transport, extracellular	na1[e] + gln_L[e] + thr_L[c] -> na1[c] + gln_L[c] + thr_L[e]	-2402.68
SERCYSNaEx	Transport, extracellular	na1[e] + cys_L[c] + ser_L[e] -> na1[c] + cys_L[e] + ser_L[c]	-2733.78
SERTHRNaEx	Transport, extracellular	na1[e] + ser_L[e] + thr_L[c] -> na1[c] + ser_L[c] + thr_L[e]	-3545.88
THRALANaEx	Transport, extracellular	na1[e] + ala_L[c] + thr_L[e] -> na1[c] + ala_L[e] + thr_L[c]	3631.55
THRASNNaEx	Transport, extracellular	na1[e] + asn_L[c] + thr_L[e] -> na1[c] + asn_L[e] + thr_L[c]	3631.47
THRGLNNaEx	Transport, extracellular	na1[e] + gln_L[c] + thr_L[e] -> na1[c] + gln_L[e] + thr_L[c]	2488.35
THRSERNaEx	Transport, extracellular	na1[e] + ser_L[c] + thr_L[e] -> na1[c] + ser_L[e] + thr_L[c]	3631.62
PROt2r	Transport, extracellular	h[e] + pro_L[e] <=> h[c] + pro_L[c]	1772.41
CYSGLUexR	Transport, extracellular	cys_L[e] + gln_L[c] <=> cys_L[c] + gln_L[e]	1633.45
CYSGLYexR	Transport, extracellular	cys_L[c] + gly[e] <=> cys_L[e] + gly[c]	-2819.48
ILEt4	Transport, extracellular	na1[e] + ile_L[e] -> na1[c] + ile_L[c]	2153.72
METLEUex	Transport, extracellular	met_L[e] + leu_L[c] -> met_L[c] + leu_L[e]	-3617.75
PHEtec	Transport, extracellular	phe_L[e] <=> phe_L[c]	-1421.15
THRGLYexR	Transport, extracellular	gly[c] + thr_L[e] <=> gly[e] + thr_L[c]	3631.58
TRPt4	Transport, extracellular	na1[e] + trp_L[e] -> na1[c] + trp_L[c]	2153.86
TYRt4	Transport, extracellular	na1[e] + tyr_L[e] -> na1[c] + tyr_L[c]	2153.78
VALt4	Transport, extracellular	na1[e] + val_L[e] -> na1[c] + val_L[c]	-1421.19
DIGALSIDEtl	Transport, lysosomal	digalside_hs[c] <=> digalside_hs[l]	4409.48
3MOBt2im	Transport, mitochondrial	h[c] + 3mob[c] -> h[m] + 3mob[m]	1967.69
ACALDtm	Transport, mitochondrial	acald[m] <=> acald[c]	-1589.84
ATPtm	Transport, mitochondrial	adp[c] + atp[m] -> atp[c] + 4 h[c] + adp[m]	-1461.8
CO2tm	Transport, mitochondrial	co2[c] <=> co2[m]	-1698.36
GLUt2m	Transport, mitochondrial	h[c] + glu_L[c] -> h[m] + glu_L[m]	-2370.78
H2O2tm	Transport, mitochondrial	h2o2[c] -> h2o2[m]	-1717.02
r0838	Transport, mitochondrial	nh4[c] <=> nh4[m]	-1480.97
r2381	Transport, mitochondrial	h[c] + akg[m] + cit[c] -> h[m] + akg[c] + cit[m]	-2754.41
AKGMALtm	Transport, mitochondrial	akg[m] + mal_L[c] <=> akg[c] + mal_L[m]	-3536.93
GLYtm	Transport, mitochondrial	gly[c] <=> gly[m]	2712.32
ILEt5m	Transport, mitochondrial	ile_L[c] <=> ile_L[m]	-1962.24
H2Otn	Transport, nuclear	h2o[n] <=> h2o[c]	-1597.99
ACACtx	Transport, peroxisomal	acac[c] <=> acac[x]	-3776.09
ARACHDCOAtx	Transport, peroxisomal	arachdcoa[c] <=> arachdcoa[x]	1965.39
DCSPTN1COAtx	Transport, peroxisomal	dcsptn1coa[c] <=> dcsptn1coa[x]	2649.84
NADPHtxu	Transport, peroxisomal	nadph[c] -> nadph[x]	-2231.36
r2503	Transport, peroxisomal	h2o[c] + atp[c] + arachdcoa[c] -> adp[c] + h[c] + pi[c] + arachdcoa[x]	2071.91
R_group_phosphotase_1	Unassigned	atp[c] + coa[c] + Rtotal[c] -> amp[c] + ppi[c] + Rtotalcoa[c]	-1784.39
ACOAD10m	Valine, leucine, and isoleucine metabolism	2mbcoa[m] + fad[m] -> 2mb2coa[m] + fadh2[m]	2221.65
OCOAT1m	Valine, leucine, and isoleucine metabolism	acac[m] + succoa[m] -> aacoa[m] + succ[m]	-1580.84
MMEm	Valine, leucine, and isoleucine metabolism	mmcoa_R[m] <=> mmcoa_S[m]	1779.62
LRAT2	Vitamin A metabolism	pchol_hs[c] + retinol_9_cis[c] -> lpchol_hs[c] + 9_cis_retfa[c]	2211.61
RAI2	Vitamin A metabolism	retinal[c] <=> retinal_cis_9[c]	-2218.04
RDH1a	Vitamin A metabolism	nadp[c] + retinol[c] -> h[c] + nadph[c] + retinal[c]	2218.04
RETH1	Vitamin A metabolism	h2o[c] + 9_cis_retfa[c] -> h[c] + Rtotal2[c] + retinol_9_cis[c]	-2833.58
RETI1	Vitamin A metabolism	retinol[c] <=> retinol_cis_11[c]	2218.03

## Sheet: marker_reaction_enzymes
ID	OFFICIAL_GENE_SYMBOL	Gene Name	EC_NUMBER	GENETIC_ASSOCIATION_DB_DISEASE	HIV_INTERACTION	OMIM_DISEASE	GOTERM_MF_FAT	KEGG_PATHWAY	PUBMED_ID	HIV_INTERACTION_PUBMED_ID
669	BPGM,	2,3-bisphosphoglycerate mutase	3.1.3.13,5.4.2.1,5.4.2.4,			Hemolytic anemia due to bisphosphoglycerate mutase deficiency,	GO:0004082~bisphosphoglycerate mutase activity,GO:0004083~2,3-bisphospho-D-glycerate 2-phosphohydrolase activity,GO:0004619~phosphoglycerate mutase activity,GO:0016791~phosphatase activity,GO:0016866~intramolecular transferase activity,GO:0016868~intramolecular transferase activity, phosphotransferases,GO:0034416~bisphosphoglycerate phosphatase activity,	hsa00010:Glycolysis / Gluconeogenesis,	11181995,12477932,12690205,1320611,1387804,14702039,152321,15258155,15489334,16344560,17052986,2542247,2824335,2844822,3023066,3036106,6313356,8440681,8889548,9308888,9832630,
26275	HIBCH,	3-hydroxyisobutyryl-Coenzyme A hydrolase	3.1.2.4,			3-hydroxyisobutryl-CoA hydrolase deficiency,	GO:0003860~3-hydroxyisobutyryl-CoA hydrolase activity,GO:0016289~CoA hydrolase activity,GO:0016790~thiolester hydrolase activity,	hsa00280:Valine, leucine and isoleucine degradation,hsa00410:beta-Alanine metabolism,hsa00640:Propanoate metabolism,	11580916,12477932,15489334,15815621,17160907,17474147,8125298,8188708,8824301,9373149,
3155	hmgcL,	3-hydroxymethyl-3-methylglutaryl-Coenzyme A lyase	4.1.3.4,	cholesterol, HDL; cholesterol, LDL; lathosterol,triglycerides,		HMG-CoA lyase deficiency,	GO:0000062~acyl-CoA binding,GO:0004419~hydroxymethylglutaryl-CoA lyase activity,GO:0005504~fatty acid binding,GO:0008289~lipid binding,GO:0016833~oxo-acid-lyase activity,GO:0031406~carboxylic acid binding,GO:0033293~monocarboxylic acid binding,GO:0043167~ion binding,GO:0043169~cation binding,GO:0046872~metal ion binding,GO:0048037~cofactor binding,GO:0050662~coenzyme binding,	hsa00072:Synthesis and degradation of ketone bodies,hsa00280:Valine, leucine and isoleucine degradation,hsa00650:Butanoate metabolism,	11129331,11952809,12464283,12477932,14702039,15122894,15164951,15489334,15752612,15764642,16169070,16330550,17173698,17459752,19036343,19177531,2116546,7527399,8027038,8102917,8440722,8617516,8798725,8978493,9463337,
54511	HMGCLL1,	3-hydroxymethyl-3-methylglutaryl-Coenzyme A lyase-like 1	4.1.3.4,				GO:0004419~hydroxymethylglutaryl-CoA lyase activity,GO:0016833~oxo-acid-lyase activity,GO:0043167~ion binding,GO:0043169~cation binding,GO:0046872~metal ion binding,		12477932,14574404,14702039,15489334,16344560,8440722,8619474,9110174,
5019	oxct1,	3-oxoacid CoA transferase 1	2.8.3.5,			Succinyl CoA:3-oxoacid CoA transferase deficiency,	GO:0008260~3-oxoacid CoA-transferase activity,GO:0008410~CoA-transferase activity,GO:0016782~transferase activity, transferring sulfur-containing groups,GO:0042802~identical protein binding,GO:0042803~protein homodimerization activity,GO:0046983~protein dimerization activity,	hsa00072:Synthesis and degradation of ketone bodies,hsa00280:Valine, leucine and isoleucine degradation,hsa00650:Butanoate metabolism,	10964512,11756565,12477932,1405472,14702039,15489334,15496607,16765626,17706444,18648183,6150478,8751852,9380443,9671268,
64064	OXCT2,	3-oxoacid CoA transferase 2	2.8.3.5,				GO:0008260~3-oxoacid CoA-transferase activity,GO:0008410~CoA-transferase activity,GO:0016782~transferase activity, transferring sulfur-containing groups,	hsa00072:Synthesis and degradation of ketone bodies,hsa00280:Valine, leucine and isoleucine degradation,hsa00650:Butanoate metabolism,	11214971,11327867,11756565,12477932,14702039,15489334,16710414,
30833	NT5C,	5', 3'-nucleotidase, cytosolic	3.1.3.-,3.1.3.5,	pyrimidine 5' nucleotidase-I deficiency,			GO:0000166~nucleotide binding,GO:0000287~magnesium ion binding,GO:0008252~nucleotidase activity,GO:0008253~5'-nucleotidase activity,GO:0016791~phosphatase activity,GO:0019103~pyrimidine nucleotide binding,GO:0043167~ion binding,GO:0043169~cation binding,GO:0046872~metal ion binding,	hsa00230:Purine metabolism,hsa00240:Pyrimidine metabolism,hsa00760:Nicotinate and nicotinamide metabolism,	10681516,10899995,12234672,12418222,12477932,12714505,14702039,15136231,15489334,18669648,2157703,2833155,3186746,
56953	nt5m,	5',3'-nucleotidase, mitochondrial	3.1.3.-,3.1.3.5,				GO:0000166~nucleotide binding,GO:0000287~magnesium ion binding,GO:0008252~nucleotidase activity,GO:0008253~5'-nucleotidase activity,GO:0016791~phosphatase activity,GO:0043167~ion binding,GO:0043169~cation binding,GO:0046872~metal ion binding,	hsa00230:Purine metabolism,hsa00240:Pyrimidine metabolism,hsa00760:Nicotinate and nicotinamide metabolism,	10899995,12124385,12352955,12477932,15489334,16004879,
22978	NT5C2,	5'-nucleotidase, cytosolic II	3.1.3.5,				GO:0000166~nucleotide binding,GO:0000287~magnesium ion binding,GO:0008252~nucleotidase activity,GO:0008253~5'-nucleotidase activity,GO:0016791~phosphatase activity,GO:0043167~ion binding,GO:0043169~cation binding,GO:0046872~metal ion binding,	hsa00230:Purine metabolism,hsa00240:Pyrimidine metabolism,hsa00760:Nicotinate and nicotinamide metabolism,	12477932,15164054,15489334,15923058,16189514,17350683,17405878,18669648,18775979,19428333,2839573,2848805,7999131,
4524	Mthfr,	5,10-methylenetetrahydrofolate reductase (NADPH)	1.5.1.20,	5-fluorouracil sensitivity.,abdominal aortic aneurysm,abdominal aortic aneurysm homocysteine hypertension,abruptio placentae,acute leukemia,Alzheimer's Disease,Alzheimer's disease; vascular dementia,antineoplastic toxicity,antiphospholipid syndrome,arsenic metabolism,Arterial and venous thrombosis,asthma; folate; hyperhomocystinemia,atherosclerosis,atherosclerosis, coronary,atherosclerosis, coron…		Cleft lip/palate, susceptibility to,Homocystinuria due to MTHFR deficiency,Neural tube defects, susceptiblity to,Schizophrenia, susceptibility to,Thromboembolism, susceptibility to,Vascular disease, susceptiblity to,	GO:0004489~methylenetetrahydrofolate reductase (NADPH) activity,GO:0016645~oxidoreductase activity, acting on the CH-NH group of donors,GO:0016646~oxidoreductase activity, acting on the CH-NH group of donors, NAD or NADP as acceptor,	hsa00670:One carbon pool by folate,hsa00680:Methane metabolism,	10323741,10536004,10679944,10791559,11018168,11022077,11024398,11025596,11048629,11054348,11056246,11058711,11062308,11073851,11074490,11074524,11080594,11084577,11085290,11092508,11094304,11096266,11096270,11098041,11101473,11108898,11118403,11121176,11122096,11124649,11128675,11133719,11142765,11146461,11150582,11155296,11157318,11161947,11168435,11169021,11170082,11170083,11177206,11186937,111…
1503	CTPS,	CTP synthase	6.3.4.2,				GO:0000166~nucleotide binding,GO:0001882~nucleoside binding,GO:0001883~purine nucleoside binding,GO:0003883~CTP synthase activity,GO:0005524~ATP binding,GO:0016879~ligase activity, forming carbon-nitrogen bonds,GO:0017076~purine nucleotide binding,GO:0030554~adenyl nucleotide binding,GO:0032553~ribonucleotide binding,GO:0032555~purine ribonucleotide binding,GO:0032559~adenyl ribonucleotide bindin…	hsa00240:Pyrimidine metabolism,	10064135,12477932,15302935,15324660,15489334,16083285,16097034,16179339,16710414,16820675,17081983,17353931,17463002,17681942,1783378,18088087,18220336,18600551,18669648,18691976,1959918,2113467,3355843,7981751,8125298,9373149,
65985	AACS,	acetoacetyl-CoA synthetase	6.2.1.16,				GO:0000166~nucleotide binding,GO:0001882~nucleoside binding,GO:0001883~purine nucleoside binding,GO:0005524~ATP binding,GO:0016877~ligase activity, forming carbon-sulfur bonds,GO:0016878~acid-thiol ligase activity,GO:0017076~purine nucleotide binding,GO:0030554~adenyl nucleotide binding,GO:0030729~acetoacetate-CoA ligase activity,GO:0032553~ribonucleotide binding,GO:0032555~purine ribonucleotide …	hsa00650:Butanoate metabolism,	12477932,12623130,14702039,15489334,17762044,17974005,18660489,4073493,9671465,
30	Acaa1,	acetyl-Coenzyme A acyltransferase 1	2.3.1.16,	high altitude performance,nephropathy, diabetic,		Pseudo-Zellweger syndrome,	GO:0003988~acetyl-CoA C-acyltransferase activity,GO:0016408~C-acyltransferase activity,	hsa00071:Fatty acid metabolism,hsa00280:Valine, leucine and isoleucine degradation,hsa01040:Biosynthesis of unsaturated fatty acids,hsa03320:PPAR signaling pathway,	10231028,10960480,11418601,12477932,14621081,15489334,16385653,1679347,18029348,18281296,2630187,2726492,2882519,3194209,7750978,8619474,9110174,
57379	AICDA,	activation-induced cytidine deaminase	3.5.4.5,	asthma,Asthma. total serum IgE,atopy,	vif:Vif,	Immunodeficiency with hyper-IgM, type 2,	GO:0004126~cytidine deaminase activity,GO:0008270~zinc ion binding,GO:0016814~hydrolase activity, acting on carbon-nitrogen (but not peptide) bonds, in cyclic amidines,GO:0019239~deaminase activity,GO:0043167~ion binding,GO:0043169~cation binding,GO:0046872~metal ion binding,GO:0046914~transition metal ion binding,	hsa04672:Intestinal immune network for IgA production,hsa05340:Primary immunodeficiency,	10950930,11007475,11076863,11112359,11256614,11544457,11823785,12011459,12097915,12114543,12202747,12477932,12511417,12521993,12651944,12683974,12715918,12799424,12855567,12873980,12928399,12973929,14536088,14551145,14769937,14990977,15061213,15087440,15148397,15182647,15195091,15252444,15304391,15371439,15372234,15448152,15489334,15489336,15593119,15613101,15814733,15944282,15949042,16122802,162…	16580072,
2180	ACSL1,	acyl-CoA synthetase long-chain family member 1	6.2.1.3,				GO:0000166~nucleotide binding,GO:0000287~magnesium ion binding,GO:0001882~nucleoside binding,GO:0001883~purine nucleoside binding,GO:0004467~long-chain-fatty-acid-CoA ligase activity,GO:0005524~ATP binding,GO:0015645~fatty-acid ligase activity,GO:0016877~ligase activity, forming carbon-sulfur bonds,GO:0017076~purine nucleotide binding,GO:0030554~adenyl nucleotide binding,GO:0032553~ribonucleotide…	hsa00071:Fatty acid metabolism,hsa03320:PPAR signaling pathway,hsa04920:Adipocytokine signaling pathway,	10548543,12477932,14702039,15292367,1531127,15489334,1599407,16054041,1607358,16834775,18660489,2007410,2341402,2973813,7429333,7490105,7948012,8399326,8584017,8889548,
84532	acss1,	acyl-CoA synthetase short-chain family member 1	6.2.1.1,				GO:0000166~nucleotide binding,GO:0001882~nucleoside binding,GO:0001883~purine nucleoside binding,GO:0003987~acetate-CoA ligase activity,GO:0005524~ATP binding,GO:0016208~AMP binding,GO:0016405~CoA-ligase activity,GO:0016877~ligase activity, forming carbon-sulfur bonds,GO:0016878~acid-thiol ligase activity,GO:0017076~purine nucleotide binding,GO:0030554~adenyl nucleotide binding,GO:0032553~ribonuc…	hsa00010:Glycolysis / Gluconeogenesis,hsa00620:Pyruvate metabolism,hsa00640:Propanoate metabolism,	11150295,11214971,11347906,11780052,12168954,12477932,14702039,15489334,
55902	ACSS2,	acyl-CoA synthetase short-chain family member 2	6.2.1.1,				GO:0000166~nucleotide binding,GO:0001882~nucleoside binding,GO:0001883~purine nucleoside binding,GO:0003987~acetate-CoA ligase activity,GO:0005524~ATP binding,GO:0016208~AMP binding,GO:0016405~CoA-ligase activity,GO:0016877~ligase activity, forming carbon-sulfur bonds,GO:0016878~acid-thiol ligase activity,GO:0017076~purine nucleotide binding,GO:0030554~adenyl nucleotide binding,GO:0032553~ribonuc…	hsa00010:Glycolysis / Gluconeogenesis,hsa00620:Pyruvate metabolism,hsa00640:Propanoate metabolism,	10843999,11780052,12477932,14702039,15231747,15489334,16344560,16788062,18029348,18088087,18660489,18669648,
34	ACADM,	acyl-Coenzyme A dehydrogenase, C-4 to C-12 straight chain	1.3.99.3,	lipid metabolism disorders,MCADD (medium chain acyl-coA hydrhydrogenase defin,medium-chain acyl-CoA dehydrogenase (MCAD) deficiency,medium-chain acyl-CoA dehydrogenase deficiency,SCAD deficiency,		Acyl-CoA dehydrogenase, medium chain, deficiency of,	GO:0000166~nucleotide binding,GO:0001882~nucleoside binding,GO:0001883~purine nucleoside binding,GO:0003995~acyl-CoA dehydrogenase activity,GO:0009055~electron carrier activity,GO:0017076~purine nucleotide binding,GO:0030554~adenyl nucleotide binding,GO:0048037~cofactor binding,GO:0050660~FAD binding,GO:0050662~coenzyme binding,	hsa00071:Fatty acid metabolism,hsa00280:Valine, leucine and isoleucine degradation,hsa00410:beta-Alanine metabolism,hsa00640:Propanoate metabolism,hsa03320:PPAR signaling pathway,	10767181,11263545,11349232,11409868,11486912,11517203,12477932,12522104,12562916,12914524,1363805,14692513,14970748,15159392,15171999,15489334,15832312,15896661,15902558,15975918,16128823,16236267,16291504,16617240,1671131,1679031,1684086,16917729,16959974,17186412,1729890,1731887,17539907,18188679,18241067,18660489,18927092,1902818,19064330,2251268,2393404,2394825,3035565,3462713,3597357,3786030…
36	ACADSB,	acyl-Coenzyme A dehydrogenase, short/branched chain	1.3.99.-,	hypertension,		2-methylbutyrylglycinuria,	GO:0000166~nucleotide binding,GO:0001882~nucleoside binding,GO:0001883~purine nucleoside binding,GO:0003995~acyl-CoA dehydrogenase activity,GO:0009055~electron carrier activity,GO:0017076~purine nucleotide binding,GO:0030554~adenyl nucleotide binding,GO:0048037~cofactor binding,GO:0050660~FAD binding,GO:0050662~coenzyme binding,	hsa00071:Fatty acid metabolism,hsa00280:Valine, leucine and isoleucine degradation,	10832746,11013134,12477932,12855692,15489334,16317551,16331963,16331964,16344560,17143180,17974005,7698750,7759115,
51	ACOX1,	acyl-Coenzyme A oxidase 1, palmitoyl	1.3.3.6,			Peroxisomal acyl-CoA oxidase deficiency,	GO:0000166~nucleotide binding,GO:0001882~nucleoside binding,GO:0001883~purine nucleoside binding,GO:0003995~acyl-CoA dehydrogenase activity,GO:0003997~acyl-CoA oxidase activity,GO:0009055~electron carrier activity,GO:0016634~oxidoreductase activity, acting on the CH-CH group of donors, oxygen as acceptor,GO:0017076~purine nucleotide binding,GO:0030554~adenyl nucleotide binding,GO:0047485~protein …	hsa00071:Fatty acid metabolism,hsa00592:alpha-Linolenic acid metabolism,hsa01040:Biosynthesis of unsaturated fatty acids,hsa03320:PPAR signaling pathway,	10856712,10960480,11076863,11230166,11815777,12477932,1464743,14702039,15489334,15489336,16381901,16396496,17081983,17458872,18281296,18536048,18660489,18669648,7668838,7876265,8040306,8117268,8125298,8159712,8507686,8798738,9373149,
353	Aprt,	adenine phosphoribosyltransferase	2.4.2.7,			Urolithiasis, 2,8-dihydroxyadenine,	GO:0000166~nucleotide binding,GO:0001882~nucleoside binding,GO:0001883~purine nucleoside binding,GO:0002054~nucleobase binding,GO:0002055~adenine binding,GO:0002060~purine binding,GO:0003999~adenine phosphoribosyltransferase activity,GO:0016208~AMP binding,GO:0016763~transferase activity, transferring pentosyl groups,GO:0017076~purine nucleotide binding,GO:0030554~adenyl nucleotide binding,GO:003…	hsa00230:Purine metabolism,	10369268,10479485,10481956,10937693,11243733,116697,12477932,12665801,1353080,14674717,15196008,15489334,15571218,16130169,17126311,17353931,1746557,17974005,18399692,1985452,2067530,2135300,2227951,2502918,3343350,3531209,3554238,3680503,3684585,457664,7660991,7685481,7915931,8455250,869896,8882882,8889579,9298830,9521589,
132	adk,	adenosine kinase	2.7.1.20,	diabetes, type 1,			GO:0000166~nucleotide binding,GO:0000287~magnesium ion binding,GO:0001882~nucleoside binding,GO:0001883~purine nucleoside binding,GO:0004001~adenosine kinase activity,GO:0005524~ATP binding,GO:0017076~purine nucleotide binding,GO:0019205~nucleobase, nucleoside, nucleotide kinase activity,GO:0019206~nucleoside kinase activity,GO:0030554~adenyl nucleotide binding,GO:0032553~ribonucleotide binding,G…	hsa00230:Purine metabolism,	10215863,11242543,12112843,12477932,12820662,15489334,17154503,18309031,185014,18600536,18600545,621091,8577746,8917457,9070863,9843365,
26289	AK5,	adenylate kinase 5	2.7.4.3,				GO:0000166~nucleotide binding,GO:0001882~nucleoside binding,GO:0001883~purine nucleoside binding,GO:0004017~adenylate kinase activity,GO:0005524~ATP binding,GO:0016776~phosphotransferase activity, phosphate group as acceptor,GO:0017076~purine nucleotide binding,GO:0019201~nucleotide kinase activity,GO:0019205~nucleobase, nucleoside, nucleotide kinase activity,GO:0019206~nucleoside kinase activity…	hsa00230:Purine metabolism,	10215863,12477932,14702039,15489334,16169070,
10327	AKR1A1,	aldo-keto reductase family 1, member A1 (aldehyde reductase)	1.1.1.2,	lymphoma lymphoma, non-Hodgkin,non-Hodgkin lymphoma,			GO:0004032~aldehyde reductase activity,GO:0004033~aldo-keto reductase activity,GO:0008106~alcohol dehydrogenase (NADP+) activity,GO:0009055~electron carrier activity,GO:0047939~L-glucuronate reductase activity,	hsa00010:Glycolysis / Gluconeogenesis,hsa00561:Glycerolipid metabolism,	10393438,10486210,10510318,11444797,11716357,12477932,15231747,15299353,15489334,15769597,1602151,16543247,17149600,18495158,18676680,1901806,19423521,2113526,2498333,3615425,7669785,7827091,8268209,8405190,9693960,
231	AKR1B1,	aldo-keto reductase family 1, member B1 (aldose reductase)	1.1.1.21,	diabetes, type 1,diabetes, type 2,diabetic glomerulopathy; glomerulopathy, diabetic; kidney failure,heart disease, ischemic macroangiopathy, diabetic stroke,hypospadias,microangiopathy,microvascular complications,nephropathy in other diseases,nephropathy, diabetic,nephropathy, diabetic; retinopathy, diabetic,nerve function,neuropathy, diabetic,retinopathy, diabetic,			GO:0004032~aldehyde reductase activity,GO:0004033~aldo-keto reductase activity,GO:0009055~electron carrier activity,	hsa00040:Pentose and glucuronate interconversions,hsa00051:Fructose and mannose metabolism,hsa00052:Galactose metabolism,hsa00561:Glycerolipid metabolism,hsa00620:Pyruvate metabolism,	10075698,10510318,11095596,11182213,11306081,11444797,11449315,11499839,11796181,11842041,11874426,11958479,12446366,12477932,12486717,12604221,12660865,12690205,1447221,14582038,14662023,14694017,14694018,14996095,15146478,15162486,15181092,15231748,15251463,15270790,15272156,15277434,15284219,15284221,15489334,15504980,15569136,15637423,15745835,15973199,16021519,16174723,16176189,1621098,16337…
8574	AKR7A2,	aldo-keto reductase family 7, member A2 (aflatoxin aldehyde reductase)	1.-.-.-,				GO:0004032~aldehyde reductase activity,GO:0004033~aldo-keto reductase activity,GO:0009055~electron carrier activity,		12071861,12477932,12879023,15489334,16189514,16429158,16710414,17591773,8125298,9373149,9576847,9823300,
440	asnS,	asparagine synthetase	6.3.5.4,				GO:0000166~nucleotide binding,GO:0001882~nucleoside binding,GO:0001883~purine nucleoside binding,GO:0004066~asparagine synthase (glutamine-hydrolyzing) activity,GO:0005524~ATP binding,GO:0016879~ligase activity, forming carbon-nitrogen bonds,GO:0016884~carbon-nitrogen ligase activity, with glutamine as amido-N-donor,GO:0017076~purine nucleotide binding,GO:0030554~adenyl nucleotide binding,GO:0032…	hsa00250:Alanine, aspartate and glutamate metabolism,hsa00910:Nitrogen metabolism,	10085239,11867623,11960987,12097650,12351626,12477932,12690205,12853948,12949534,15385533,15489334,15674423,16023613,16169070,16344560,16598302,17088436,17276738,17380207,17409444,18840095,18852115,18940792,19054556,2564390,2565875,2569668,2573597,2714790,2886907,3470743,6137879,7904551,8093451,9847074,9861020,
1374	Cpt1a,	carnitine palmitoyltransferase 1A (liver)	2.3.1.21,	diabetes, type 2 hepatic lipid content insulin,hepatitis C, chronic,left ventricular hypertrophy,obesity,	env:Envelope surface glycoprotein gp160, precursor,	CPT deficiency, hepatic, type IA,	GO:0004095~carnitine O-palmitoyltransferase activity,GO:0008374~O-acyltransferase activity,GO:0016406~carnitine O-acyltransferase activity,GO:0016409~palmitoyltransferase activity,GO:0016416~O-palmitoyltransferase activity,	hsa00071:Fatty acid metabolism,hsa03320:PPAR signaling pathway,hsa04920:Adipocytokine signaling pathway,	10408760,11001805,11095714,11350182,11441142,12111367,12189492,12464674,12477932,14517221,14711372,15110323,15489334,15647998,15669684,15846373,16246309,16271724,16344560,16697732,16806233,17089095,17445541,17452323,18253084,18385088,18996102,19181627,19217814,7892212,9070836,9070950,9691089,	11095714,
126129	Cpt1c,	carnitine palmitoyltransferase 1C	2.3.1.21,		env:Envelope surface glycoprotein gp160, precursor,		GO:0004095~carnitine O-palmitoyltransferase activity,GO:0008374~O-acyltransferase activity,GO:0016406~carnitine O-acyltransferase activity,GO:0016409~palmitoyltransferase activity,GO:0016416~O-palmitoyltransferase activity,	hsa00071:Fatty acid metabolism,hsa03320:PPAR signaling pathway,hsa04920:Adipocytokine signaling pathway,	11001805,11095714,12376098,12477932,14702039,15489334,17974005,18192268,18385088,	11095714,
1375	CHKB,Cpt1b,	choline kinase beta; carnitine palmitoyltransferase 1B (muscle)	2.3.1.21,2.7.1.32,2.7.1.82,	left ventricular hypertrophy,obesity,	env:Envelope surface glycoprotein gp160, precursor,	A genome-wide association study for late-onset Alzheimer's disease using DNA pooling,Variant between CPT1B and CHKB associated with susceptibility to narcolepsy,	GO:0000166~nucleotide binding,GO:0001882~nucleoside binding,GO:0001883~purine nucleoside binding,GO:0004095~carnitine O-palmitoyltransferase activity,GO:0004103~choline kinase activity,GO:0004305~ethanolamine kinase activity,GO:0005524~ATP binding,GO:0008374~O-acyltransferase activity,GO:0016406~carnitine O-acyltransferase activity,GO:0016409~palmitoyltransferase activity,GO:0016416~O-palmitoyltr…	hsa00071:Fatty acid metabolism,hsa00564:Glycerophospholipid metabolism,hsa03320:PPAR signaling pathway,hsa04920:Adipocytokine signaling pathway,	10408760,10493829,10591208,10706593,10918069,11001805,11095714,11257506,11258795,12015320,12477932,12565845,14702039,15003397,15356291,15461802,15489334,15579906,15647998,16054041,17089095,17924679,17987377,18660489,18820697,18823527,18996102,19074885,19404393,8125298,8679700,9070950,9199240,9224698,9344464,9370318,9373149,9487136,	11095714,
54981	C9orf95,	chromosome 9 open reading frame 95	2.7.1.22,2.7.1.n4,				GO:0000166~nucleotide binding,GO:0000287~magnesium ion binding,GO:0001882~nucleoside binding,GO:0001883~purine nucleoside binding,GO:0005524~ATP binding,GO:0017076~purine nucleotide binding,GO:0030554~adenyl nucleotide binding,GO:0032553~ribonucleotide binding,GO:0032555~purine ribonucleotide binding,GO:0032559~adenyl ribonucleotide binding,GO:0043167~ion binding,GO:0043169~cation binding,GO:0046…	hsa00760:Nicotinate and nicotinamide metabolism,	12477932,14702039,15137942,15164053,15489334,17698003,17914902,8809081,
978	cda,	cytidine deaminase	3.5.4.5,	gemcitabine pharmacokinetics neutropenia,leukemia, acute myeloblastic,			GO:0001882~nucleoside binding,GO:0004126~cytidine deaminase activity,GO:0008270~zinc ion binding,GO:0016814~hydrolase activity, acting on carbon-nitrogen (but not peptide) bonds, in cyclic amidines,GO:0019239~deaminase activity,GO:0042802~identical protein binding,GO:0042803~protein homodimerization activity,GO:0043167~ion binding,GO:0043169~cation binding,GO:0046872~metal ion binding,GO:0046914~…	hsa00240:Pyrimidine metabolism,hsa00983:Drug metabolism,	10497201,12107413,12113294,12477932,12651944,12844405,14565460,14565461,14744791,14983087,15489334,15689149,15713780,16303324,16304576,16446974,16507781,16710414,17194903,17464349,17479107,17640070,18347182,18537153,18538445,18600531,18762567,18775979,19293806,53069,7923172,8001985,8422236,9596658,9878810,
51727	CMPK1,	cytidine monophosphate (UMP-CMP) kinase 1, cytosolic	2.7.4.14,				GO:0000166~nucleotide binding,GO:0001882~nucleoside binding,GO:0001883~purine nucleoside binding,GO:0004127~cytidylate kinase activity,GO:0004849~uridine kinase activity,GO:0005524~ATP binding,GO:0016776~phosphotransferase activity, phosphate group as acceptor,GO:0017076~purine nucleotide binding,GO:0019201~nucleotide kinase activity,GO:0019205~nucleobase, nucleoside, nucleotide kinase activity,G…	hsa00240:Pyrimidine metabolism,	10462544,10931946,11681623,11912132,12477932,12694191,1286669,15163660,15489334,15550676,15606899,16710414,17608725,8125298,8313870,9373149,
1606	dgkA,	diacylglycerol kinase, alpha 80kDa	2.7.1.107,				GO:0000166~nucleotide binding,GO:0001882~nucleoside binding,GO:0001883~purine nucleoside binding,GO:0004143~diacylglycerol kinase activity,GO:0005509~calcium ion binding,GO:0005524~ATP binding,GO:0005543~phospholipid binding,GO:0008270~zinc ion binding,GO:0008289~lipid binding,GO:0017076~purine nucleotide binding,GO:0019992~diacylglycerol binding,GO:0030554~adenyl nucleotide binding,GO:0032553~ri…	hsa00561:Glycerolipid metabolism,hsa00564:Glycerophospholipid metabolism,hsa04070:Phosphatidylinositol signaling system,	10206945,10358029,11285286,12477932,12626538,14559993,14702039,14734770,15117825,15122338,15489334,15870081,15928040,17276726,17911109,18004883,18083107,18424699,2175712,7959783,8180475,8626603,
1607	DGKB,	diacylglycerol kinase, beta 90kDa	2.7.1.107,				GO:0000166~nucleotide binding,GO:0001882~nucleoside binding,GO:0001883~purine nucleoside binding,GO:0004143~diacylglycerol kinase activity,GO:0005509~calcium ion binding,GO:0005524~ATP binding,GO:0008270~zinc ion binding,GO:0008289~lipid binding,GO:0017076~purine nucleotide binding,GO:0019992~diacylglycerol binding,GO:0030554~adenyl nucleotide binding,GO:0032553~ribonucleotide binding,GO:0032555~…	hsa00561:Glycerolipid metabolism,hsa00564:Glycerophospholipid metabolism,hsa04070:Phosphatidylinositol signaling system,	11719522,12477932,12690205,12853948,14702039,15489334,16344560,17353931,18062770,7689223,9872452,
8527	DGKD,	diacylglycerol kinase, delta 130kDa	2.7.1.107,				GO:0000166~nucleotide binding,GO:0001882~nucleoside binding,GO:0001883~purine nucleoside binding,GO:0004143~diacylglycerol kinase activity,GO:0005524~ATP binding,GO:0008270~zinc ion binding,GO:0008289~lipid binding,GO:0017076~purine nucleotide binding,GO:0019992~diacylglycerol binding,GO:0030554~adenyl nucleotide binding,GO:0032553~ribonucleotide binding,GO:0032555~purine ribonucleotide binding,G…	hsa00561:Glycerolipid metabolism,hsa00564:Glycerophospholipid metabolism,hsa04070:Phosphatidylinositol signaling system,	11309392,11809841,12084710,12200442,12477932,12810723,15228384,15489334,16169070,17357084,18267070,18334213,8590280,8626538,
8526	DGKE,	diacylglycerol kinase, epsilon 64kDa	2.7.1.107,			Many sequence variants affecting diversity of adult human height,	GO:0000166~nucleotide binding,GO:0001882~nucleoside binding,GO:0001883~purine nucleoside binding,GO:0004143~diacylglycerol kinase activity,GO:0005524~ATP binding,GO:0008270~zinc ion binding,GO:0008289~lipid binding,GO:0017076~purine nucleotide binding,GO:0019992~diacylglycerol binding,GO:0030554~adenyl nucleotide binding,GO:0032553~ribonucleotide binding,GO:0032555~purine ribonucleotide binding,G…	hsa00561:Glycerolipid metabolism,hsa00564:Glycerophospholipid metabolism,hsa04070:Phosphatidylinositol signaling system,	10051413,10571048,12477932,14702039,15489334,16344560,16959974,17353931,17455907,18004883,18391951,19329342,8626589,8889548,
160851	DGKH,	diacylglycerol kinase, eta	2.7.1.107,	bipolar disorder,		A genome-wide association study implicates diacylglycerol kinase eta (DGKH) and several other genes in the etiology of bipolar disorder,	GO:0000166~nucleotide binding,GO:0001882~nucleoside binding,GO:0001883~purine nucleoside binding,GO:0004143~diacylglycerol kinase activity,GO:0005524~ATP binding,GO:0008270~zinc ion binding,GO:0008289~lipid binding,GO:0017076~purine nucleotide binding,GO:0019992~diacylglycerol binding,GO:0030554~adenyl nucleotide binding,GO:0032553~ribonucleotide binding,GO:0032555~purine ribonucleotide binding,G…	hsa00561:Glycerolipid metabolism,hsa00564:Glycerophospholipid metabolism,hsa04070:Phosphatidylinositol signaling system,	12477932,12810723,14702039,15057823,15489334,17486107,17974005,19308021,19328558,8702685,9438377,
1608	Dgkg,	diacylglycerol kinase, gamma 90kDa	2.7.1.107,			Genome-wide association yields new sequence variants at seven loci that associate with measures of obesity,	GO:0000166~nucleotide binding,GO:0001882~nucleoside binding,GO:0001883~purine nucleoside binding,GO:0004143~diacylglycerol kinase activity,GO:0005509~calcium ion binding,GO:0005524~ATP binding,GO:0008270~zinc ion binding,GO:0008289~lipid binding,GO:0017076~purine nucleotide binding,GO:0019992~diacylglycerol binding,GO:0030554~adenyl nucleotide binding,GO:0032553~ribonucleotide binding,GO:0032555~…	hsa00561:Glycerolipid metabolism,hsa00564:Glycerophospholipid metabolism,hsa04070:Phosphatidylinositol signaling system,	10071200,12477932,12732202,12941073,14702039,15102830,15150663,15194113,15212759,15489334,15578578,16288460,16407189,16641997,16905533,16959974,17803461,19079260,8034597,8889548,9003401,
9162	DGKI,	diacylglycerol kinase, iota	2.7.1.107,				GO:0000166~nucleotide binding,GO:0001882~nucleoside binding,GO:0001883~purine nucleoside binding,GO:0004143~diacylglycerol kinase activity,GO:0005524~ATP binding,GO:0008270~zinc ion binding,GO:0017076~purine nucleotide binding,GO:0030554~adenyl nucleotide binding,GO:0032553~ribonucleotide binding,GO:0032555~purine ribonucleotide binding,GO:0032559~adenyl ribonucleotide binding,GO:0043167~ion bind…	hsa00561:Glycerolipid metabolism,hsa00564:Glycerophospholipid metabolism,hsa04070:Phosphatidylinositol signaling system,	10706894,12690205,14702039,17986458,18187866,19065143,9830018,
1609	dgkq,	diacylglycerol kinase, theta 110kDa	2.7.1.107,			Genomewide association study for susceptibility genes contributing to familial Parkinson disease,	GO:0000166~nucleotide binding,GO:0001882~nucleoside binding,GO:0001883~purine nucleoside binding,GO:0004143~diacylglycerol kinase activity,GO:0005524~ATP binding,GO:0008270~zinc ion binding,GO:0008289~lipid binding,GO:0017076~purine nucleotide binding,GO:0019899~enzyme binding,GO:0019900~kinase binding,GO:0019992~diacylglycerol binding,GO:0030554~adenyl nucleotide binding,GO:0032553~ribonucleotid…	hsa00561:Glycerolipid metabolism,hsa00564:Glycerophospholipid metabolism,hsa04070:Phosphatidylinositol signaling system,	10066731,12477932,12799190,15632189,17664281,18985386,7607687,8617502,8626538,9099683,9438377,
8525	DGKZ,	diacylglycerol kinase, zeta 104kDa	2.7.1.107,				GO:0000166~nucleotide binding,GO:0001727~lipid kinase activity,GO:0001882~nucleoside binding,GO:0001883~purine nucleoside binding,GO:0004143~diacylglycerol kinase activity,GO:0004857~enzyme inhibitor activity,GO:0005524~ATP binding,GO:0008022~protein C-terminus binding,GO:0008270~zinc ion binding,GO:0008289~lipid binding,GO:0017076~purine nucleotide binding,GO:0019992~diacylglycerol binding,GO:00…	hsa00561:Glycerolipid metabolism,hsa00564:Glycerophospholipid metabolism,hsa04070:Phosphatidylinositol signaling system,	11078732,11257115,11352924,12015310,12070163,12477932,12883552,12890670,14551255,14702039,14707140,15157668,15489334,15632115,16169070,16286473,16554811,17081983,17351151,18004883,18694729,8125298,8626588,9159104,9373149,9716136,
1962	EHHADH,	enoyl-Coenzyme A, hydratase/3-hydroxyacyl Coenzyme A dehydrogenase	1.1.1.35,4.2.1.17,5.3.3.8,				GO:0003857~3-hydroxyacyl-CoA dehydrogenase activity,GO:0004165~dodecenoyl-CoA delta-isomerase activity,GO:0004300~enoyl-CoA hydratase activity,GO:0016836~hydro-lyase activity,GO:0016860~intramolecular oxidoreductase activity,GO:0016863~intramolecular oxidoreductase activity, transposing C=C bonds,GO:0048037~cofactor binding,GO:0050662~coenzyme binding,	hsa00071:Fatty acid metabolism,hsa00280:Valine, leucine and isoleucine degradation,hsa00310:Lysine degradation,hsa00380:Tryptophan metabolism,hsa00410:beta-Alanine metabolism,hsa00640:Propanoate metabolism,hsa00650:Butanoate metabolism,hsa00903:Limonene and pinene degradation,hsa03320:PPAR signaling pathway,	11451959,12477932,15489334,1651711,17287340,18660489,19240061,8125298,8188243,9185222,9373149,
2194	FASN,	fatty acid synthase	1.1.1.100,1.3.1.10,2.3.1.38,2.3.1.39,2.3.1.41,2.3.1.85,3.1.2.14,4.2.1.61,				GO:0000036~acyl carrier activity,GO:0004312~fatty-acid synthase activity,GO:0004313~[acyl-carrier-protein] S-acetyltransferase activity,GO:0004314~[acyl-carrier-protein] S-malonyltransferase activity,GO:0004315~3-oxoacyl-[acyl-carrier-protein] synthase activity,GO:0004316~3-oxoacyl-[acyl-carrier-protein] reductase activity,GO:0004317~3-hydroxypalmitoyl-[acyl-carrier-protein] dehydratase activity,…	hsa00061:Fatty acid biosynthesis,hsa04910:Insulin signaling pathway,	1044453,10769045,11018265,11034606,11248039,11756679,11790787,12060737,12213084,12477932,12515624,12531699,12646257,12815048,12839976,12882974,12939396,14689581,15047835,15113941,15220220,15235125,15254710,15302935,15489334,15507492,15523670,15669079,15897909,16175090,16215233,16582625,16625196,16644689,16806233,16894240,16964243,17081065,17081983,17188392,17220478,17492427,17618104,17618296,1763…
2203	Fbp1,	fructose-1,6-bisphosphatase 1	3.1.3.11,		gag:matrix,	Fructose-1,6-bidphosphatase deficiency,Fructose-bisphosphatase deficiency,	GO:0000287~magnesium ion binding,GO:0004331~fructose-2,6-bisphosphate 2-phosphatase activity,GO:0005529~sugar binding,GO:0016791~phosphatase activity,GO:0019203~carbohydrate phosphatase activity,GO:0030246~carbohydrate binding,GO:0042132~fructose 1,6-bisphosphate 1-phosphatase activity,GO:0042802~identical protein binding,GO:0043167~ion binding,GO:0043169~cation binding,GO:0046872~metal ion bindi…	hsa00010:Glycolysis / Gluconeogenesis,hsa00030:Pentose phosphate pathway,hsa00051:Fructose and mannose metabolism,hsa04910:Insulin signaling pathway,	10222032,12126934,12477932,12507293,15164053,15489334,15965961,16169070,16189514,16344560,16442285,16446092,18029348,18375435,18460190,1846613,18650089,18660489,18780768,18978678,2164670,2842796,7558035,7589895,7763253,7809062,8125298,8135811,8382525,8387495,8530070,9282826,9373149,9380240,9382095,	9282826,
8789	FBP2,	fructose-1,6-bisphosphatase 2	3.1.3.11,		gag:matrix,		GO:0000287~magnesium ion binding,GO:0004331~fructose-2,6-bisphosphate 2-phosphatase activity,GO:0016791~phosphatase activity,GO:0019203~carbohydrate phosphatase activity,GO:0042132~fructose 1,6-bisphosphate 1-phosphatase activity,GO:0043167~ion binding,GO:0043169~cation binding,GO:0046872~metal ion binding,	hsa00010:Glycolysis / Gluconeogenesis,hsa00030:Pentose phosphate pathway,hsa00051:Fructose and mannose metabolism,hsa04910:Insulin signaling pathway,	10773464,12477932,15164053,15489334,16213487,18083107,18214967,9282826,9678974,	9282826,
2271	FH,	fumarate hydratase	4.2.1.2,	cutaneous and uterine leiomyomata,hereditary leiomyomatosis,leiomyoma,		Fumarase deficiency,Leiomyomatosis and renal cell cancer,Multiple cutaneous and uterine leiomyomata,	GO:0004333~fumarate hydratase activity,GO:0016836~hydro-lyase activity,	hsa00020:Citrate cycle (TCA cycle),hsa05200:Pathways in cancer,hsa05211:Renal cell carcinoma,	11865300,12021453,12177782,12477932,12612654,12772087,14632190,15334541,15489334,15724016,15937070,16098467,16237213,16319128,16477632,16597677,16639410,16757530,16774737,16881969,17476294,17908262,17960613,18083107,18257390,18313410,18503824,18514489,18728283,18986479,19075141,19151755,19276158,2759092,3828494,4018793,434773,8200987,9635293,975868,
2645	gck,	glucokinase (hexokinase 4)	2.7.1.2,	atherosclerosis, coronary; diabetes, type 2,birth weight glucose,Defective colour vision,diabetes mellitus,diabetes, gestational,diabetes, post-renal transplant; post-renal transplant diabetes,diabetes, type 1,diabetes, type 2,glucose tolerance; metabolic syndrome; hyperglycemia,glucose; birth weight,growth hormone secretion and height,hypertension,insulin resistance,non-Type 1 diabetes mellitus,…		Diabetes mellitus, gestational,Diabetes mellitus, noninsulin-dependent, late onset,Diabetes mellitus, permanent neonatal,Hyperinsulinemic hypoglycemia, familial, 3,maturity onset diabetes of the young,maturity onset diabetes of the young 2,MODY, type II,	GO:0000166~nucleotide binding,GO:0001882~nucleoside binding,GO:0001883~purine nucleoside binding,GO:0004340~glucokinase activity,GO:0004396~hexokinase activity,GO:0005524~ATP binding,GO:0005529~sugar binding,GO:0005536~glucose binding,GO:0017076~purine nucleotide binding,GO:0019200~carbohydrate kinase activity,GO:0030246~carbohydrate binding,GO:0030554~adenyl nucleotide binding,GO:0032553~ribonuc…	hsa00010:Glycolysis / Gluconeogenesis,hsa00052:Galactose metabolism,hsa00500:Starch and sucrose metabolism,hsa00520:Amino sugar and nucleotide sugar metabolism,hsa04910:Insulin signaling pathway,hsa04930:Type II diabetes mellitus,hsa04950:Maturity onset diabetes of the young,	10588527,10601273,10694920,11106831,11112984,11237213,11372010,11440371,11473043,11522786,11756407,11772903,11914755,12050210,12101177,12442280,12477932,12515438,12627330,12690205,12941786,1303265,1349989,1354840,1360036,1397713,14517946,14578306,14617577,14627435,1464666,14702039,14747279,15009676,15016359,1502186,1511800,15173029,15277402,15305805,1545870,15489334,15677479,15677518,1570017,1584…
10007	gnpda1,	glucosamine-6-phosphate deaminase 1	3.5.99.6,				GO:0004342~glucosamine-6-phosphate deaminase activity,GO:0016860~intramolecular oxidoreductase activity,GO:0016861~intramolecular oxidoreductase activity, interconverting aldoses and ketoses,GO:0019239~deaminase activity,	hsa00520:Amino sugar and nucleotide sugar metabolism,	10964516,12477932,12616532,12965206,14702039,15372022,15489334,16189514,16344560,18029348,7577655,7584044,8747459,9438414,9714720,
132789	Gnpda2,	glucosamine-6-phosphate deaminase 2	3.5.99.6,			Six new loci associated with body mass index highlight a neuronal influence on body weight regulation,	GO:0004342~glucosamine-6-phosphate deaminase activity,GO:0016860~intramolecular oxidoreductase activity,GO:0016861~intramolecular oxidoreductase activity, interconverting aldoses and ketoses,GO:0019239~deaminase activity,	hsa00520:Amino sugar and nucleotide sugar metabolism,	12477932,12616532,12965206,14702039,15489334,17974005,18029348,19079261,19164386,
92579	G6pc3,	glucose 6 phosphatase, catalytic, 3	3.1.3.9,			Neutropenia, severe congenital, autosomal recessive 4,	GO:0004346~glucose-6-phosphatase activity,GO:0016791~phosphatase activity,GO:0019203~carbohydrate phosphatase activity,		12370122,12477932,12965222,13129915,14718531,14765991,15489334,19118303,
2821	GPI,	glucose phosphate isomerase	5.3.1.9,	hereditary nonspherocytic hemolytic anemia (HNSHA).,	env:Envelope surface glycoprotein gp120,	Hemolytic anemia due to glucosephosphate isomerase deficiency,Hydrops fetalis, one form,	GO:0004347~glucose-6-phosphate isomerase activity,GO:0005125~cytokine activity,GO:0008083~growth factor activity,GO:0016860~intramolecular oxidoreductase activity,GO:0016861~intramolecular oxidoreductase activity, interconverting aldoses and ketoses,	hsa00010:Glycolysis / Gluconeogenesis,hsa00030:Pentose phosphate pathway,hsa00500:Starch and sucrose metabolism,hsa00520:Amino sugar and nucleotide sugar metabolism,	10216265,10727272,10916680,11004567,11264592,11371164,11418246,11431735,11437381,11688991,11896391,11896393,12054796,12163179,12477932,12517804,12527360,12573240,12737943,12777791,12783864,14566819,14715248,15034067,15059907,15290745,15369782,15489334,15570012,15637053,15850830,16563432,16949042,17041899,17071500,17690101,17925402,18311788,18485900,18669648,19064002,2387591,2544027,2547084,302069…	2547084,
2538	G6PC,	glucose-6-phosphatase, catalytic subunit	3.1.3.9,	glycogen storage disease,SIDS/sudden infant death syndrome,		Glycogen storage disease I,	GO:0004346~glucose-6-phosphatase activity,GO:0016791~phosphatase activity,GO:0019203~carbohydrate phosphatase activity,GO:0042301~phosphate binding,GO:0043167~ion binding,GO:0043168~anion binding,	hsa00010:Glycolysis / Gluconeogenesis,hsa00052:Galactose metabolism,hsa00500:Starch and sucrose metabolism,hsa04910:Insulin signaling pathway,hsa04920:Adipocytokine signaling pathway,	10023055,10024523,10026167,10070617,10094563,10318794,10447271,10452914,10612834,10738005,10748407,10874313,10960498,11058903,11058910,11672436,11739393,12093795,12189168,12373566,12444104,12477932,12556524,12560945,13129915,14702039,14718531,14759518,15316959,15489334,15542400,15661744,15696478,15918042,16892178,16893891,16959974,17354259,175958,18008183,18449899,18660489,18805788,18847435,19082…
57818	G6PC2,	glucose-6-phosphatase, catalytic, 2	3.1.3.9,			A Polymorphism Within the G6PC2 Gene is Associated with Fasting Plasma Glucose Levels,Fasting plasma glucose level QTL 1,Genome-wide association analysis of metabolic traits in a birth cohort from a founder population,Variations in the G6PC2/ABCB11 genomic region are associated with fasting glucose levels,	GO:0004346~glucose-6-phosphatase activity,GO:0016791~phosphatase activity,GO:0019203~carbohydrate phosphatase activity,	hsa00010:Glycolysis / Gluconeogenesis,hsa00052:Galactose metabolism,hsa00500:Starch and sucrose metabolism,hsa04910:Insulin signaling pathway,hsa04920:Adipocytokine signaling pathway,	10078553,10078554,11297555,12477932,12815107,14722102,15044018,15489334,16012821,16493034,16520917,17376840,17607665,17974005,18451265,18521185,18753309,18984742,19060907,19060910,19082990,19096518,19125775,19238352,
2752	GLUL,	glutamate-ammonia ligase (glutamine synthetase)	6.3.1.2,	schizophrenia,		Glutamine deficiency, congenital,	GO:0000166~nucleotide binding,GO:0001882~nucleoside binding,GO:0001883~purine nucleoside binding,GO:0004356~glutamate-ammonia ligase activity,GO:0005524~ATP binding,GO:0016211~ammonia ligase activity,GO:0016879~ligase activity, forming carbon-nitrogen bonds,GO:0016880~acid-ammonia (or amide) ligase activity,GO:0017076~purine nucleotide binding,GO:0030554~adenyl nucleotide binding,GO:0032553~ribon…	hsa00250:Alanine, aspartate and glutamate metabolism,hsa00330:Arginine and proline metabolism,hsa00910:Nitrogen metabolism,	10520940,10681395,12160938,12387715,12477932,14702039,14760703,15231748,15489334,15642443,16095760,16189514,16267323,16537434,16609938,16710414,1681907,17197094,17627080,17974005,18005987,18029348,18192886,18555765,18662667,19125103,19156168,19204801,2856920,2888076,7909780,7923146,8921392,8975719,9107685,9260745,9263280,
2729	GCLC,	glutamate-cysteine ligase, catalytic subunit	6.3.2.2,	2-thiothiazolidine-4-carboxylic acid levels,berylliosis,chronic obstructive pulmonary disease/COPD,cystic fibrosis,decreased glutathione production.,diabetes, type 1 glutamate decarboxylase antibody,methylmercury retention,myocardial infarct; coronary endothelial vasomotor dysfunction,Posttransplantation diabetes mellitus (PTDM),		Hemolytic anemia due to gamma-glutamylcysteine synthetase deficiency,Myocardial infarction, susceptibility to,	GO:0000166~nucleotide binding,GO:0000287~magnesium ion binding,GO:0001882~nucleoside binding,GO:0001883~purine nucleoside binding,GO:0004357~glutamate-cysteine ligase activity,GO:0005524~ATP binding,GO:0016595~glutamate binding,GO:0016597~amino acid binding,GO:0016879~ligase activity, forming carbon-nitrogen bonds,GO:0016881~acid-amino acid ligase activity,GO:0017076~purine nucleotide binding,GO:…	hsa00480:Glutathione metabolism,	10395918,10439045,10515893,10733484,11444867,11820781,11844594,11972604,12070177,12477932,12500194,12598062,12663448,1350904,14574404,14676828,14702039,15451055,15485876,15489334,16183645,16322067,16403949,16491484,16599007,16690975,16766924,17109620,17207022,17333241,17344309,17479437,17601350,17643973,17921251,17961430,18035085,18066575,18276794,18420959,18549827,18560528,18614560,18926903,1897…
2730	GCLM,	glutamate-cysteine ligase, modifier subunit	6.3.2.2,	2-thiothiazolidine-4-carboxylic acid levels,atherosclerosis, coronary,berylliosis,chronic obstructive pulmonary disease/COPD,cognitive impairment, vascular stroke, ischemic,methylmercury retention,myocardial infarction,		Myocardial infarction, susceptibility to,	GO:0004357~glutamate-cysteine ligase activity,GO:0016879~ligase activity, forming carbon-nitrogen bonds,GO:0016881~acid-amino acid ligase activity,GO:0019899~enzyme binding,GO:0035226~glutamate-cysteine ligase catalytic subunit binding,GO:0046982~protein heterodimerization activity,GO:0046983~protein dimerization activity,	hsa00480:Glutathione metabolism,	10395918,10674357,12081989,12477932,12975258,14532974,15451055,15489334,15946948,16081425,16183645,16599007,16677451,16710414,16766924,16909399,17333241,17344309,17353931,17548779,17643973,17924854,17961430,18066575,18449862,18560528,18614560,18991850,19056482,19126404,19153097,19420105,7826375,7829101,8825659,8978789,9675072,9841137,9841880,9895302,
2987	GUK1,	guanylate kinase 1	2.7.4.8,				GO:0000166~nucleotide binding,GO:0001882~nucleoside binding,GO:0001883~purine nucleoside binding,GO:0004385~guanylate kinase activity,GO:0005524~ATP binding,GO:0016776~phosphotransferase activity, phosphate group as acceptor,GO:0017076~purine nucleotide binding,GO:0019201~nucleotide kinase activity,GO:0019205~nucleobase, nucleoside, nucleotide kinase activity,GO:0019206~nucleoside kinase activity…	hsa00230:Purine metabolism,	12107411,12477932,15489334,16341674,16832584,211390,2164269,6249178,6260205,8647247,8663313,
3098	HK1,	hexokinase 1	2.7.1.1,			Hemolytic anemia due to hexokinase deficiency,	GO:0000166~nucleotide binding,GO:0001882~nucleoside binding,GO:0001883~purine nucleoside binding,GO:0004396~hexokinase activity,GO:0005524~ATP binding,GO:0017076~purine nucleotide binding,GO:0019200~carbohydrate kinase activity,GO:0030554~adenyl nucleotide binding,GO:0032553~ribonucleotide binding,GO:0032555~purine ribonucleotide binding,GO:0032559~adenyl ribonucleotide binding,	hsa00010:Glycolysis / Gluconeogenesis,hsa00051:Fructose and mannose metabolism,hsa00052:Galactose metabolism,hsa00500:Starch and sucrose metabolism,hsa00520:Amino sugar and nucleotide sugar metabolism,hsa04910:Insulin signaling pathway,hsa04930:Type II diabetes mellitus,	10356311,10574795,10686099,10978502,12393545,12432216,12477932,14702039,15164054,15489334,1572668,16166083,16169070,16344560,1637300,17080299,17494625,18212354,18308720,19034380,19049977,19096518,19165527,1985912,2059200,2297576,3207429,6848140,7655856,8420959,8706938,8720117,8722688,9028305,9414310,9450953,9493266,9531504,9665168,9735292,
3099	Hk2,HK2P1,	hexokinase 2 pseudogene; hexokinase 2	2.7.1.1,	diabetes, type 2,			GO:0000166~nucleotide binding,GO:0001882~nucleoside binding,GO:0001883~purine nucleoside binding,GO:0004396~hexokinase activity,GO:0005524~ATP binding,GO:0005529~sugar binding,GO:0005536~glucose binding,GO:0017076~purine nucleotide binding,GO:0019200~carbohydrate kinase activity,GO:0030246~carbohydrate binding,GO:0030554~adenyl nucleotide binding,GO:0032553~ribonucleotide binding,GO:0032555~purin…	hsa00010:Glycolysis / Gluconeogenesis,hsa00051:Fructose and mannose metabolism,hsa00052:Galactose metabolism,hsa00500:Starch and sucrose metabolism,hsa00520:Amino sugar and nucleotide sugar metabolism,hsa04910:Insulin signaling pathway,hsa04930:Type II diabetes mellitus,	11068878,11688991,12477932,12663490,14672622,14747281,15489334,15710218,15967114,16189514,16396496,16551620,16713569,17785433,18271924,18535403,18772588,19033437,19049977,7489847,7518342,7590357,7622509,7883120,7883122,7883123,7999069,8250948,8307259,8567628,8721778,8786021,8834247,8889548,8911786,9056853,9278438,9447955,
3101	HK3,	hexokinase 3 (white cell)	2.7.1.1,				GO:0000166~nucleotide binding,GO:0001882~nucleoside binding,GO:0001883~purine nucleoside binding,GO:0004396~hexokinase activity,GO:0005524~ATP binding,GO:0017076~purine nucleotide binding,GO:0019200~carbohydrate kinase activity,GO:0019899~enzyme binding,GO:0030554~adenyl nucleotide binding,GO:0032553~ribonucleotide binding,GO:0032555~purine ribonucleotide binding,GO:0032559~adenyl ribonucleotide …	hsa00010:Glycolysis / Gluconeogenesis,hsa00051:Fructose and mannose metabolism,hsa00052:Galactose metabolism,hsa00500:Starch and sucrose metabolism,hsa00520:Amino sugar and nucleotide sugar metabolism,hsa04910:Insulin signaling pathway,hsa04930:Type II diabetes mellitus,	11068878,1190733,12477932,12488461,12543931,15489334,16959974,4058069,7150652,8717435,8812439,8941369,9468341,
80201	HKDC1,	hexokinase domain containing 1	2.7.1.1,				GO:0000166~nucleotide binding,GO:0001882~nucleoside binding,GO:0001883~purine nucleoside binding,GO:0004396~hexokinase activity,GO:0005524~ATP binding,GO:0017076~purine nucleotide binding,GO:0019200~carbohydrate kinase activity,GO:0030554~adenyl nucleotide binding,GO:0032553~ribonucleotide binding,GO:0032555~purine ribonucleotide binding,GO:0032559~adenyl ribonucleotide binding,		12477932,14702039,15164054,15489334,17974005,
3295	hsd17b4,	hydroxysteroid (17-beta) dehydrogenase 4	1.1.1.35,4.2.1.107,			D-bifunctional protein deficiency,	GO:0003857~3-hydroxyacyl-CoA dehydrogenase activity,GO:0004303~estradiol 17-beta-dehydrogenase activity,GO:0005319~lipid transporter activity,GO:0015248~sterol transporter activity,GO:0016229~steroid dehydrogenase activity,GO:0016836~hydro-lyase activity,GO:0033764~steroid dehydrogenase activity, acting on the CH-OH group of donors, NAD or NADP as acceptor,GO:0033989~3alpha,7alpha,12alpha-trihydr…	hsa00120:Primary bile acid biosynthesis,	10199776,10343282,10400999,10402265,10419023,11700068,11743515,11964182,11992265,12477932,14702039,15489334,15635413,15644212,16344560,16385454,16766224,17220478,18086758,18281655,18415690,18676680,18691976,18794456,19027726,19100308,2303409,2921319,7487879,8279468,8547189,8902629,8938456,9089413,9133619,9197465,9345094,9482850,9783542,9880674,9915948,
286297	LOC286297,	hypothetical protein LOC286297					GO:0000166~nucleotide binding,GO:0001882~nucleoside binding,GO:0001883~purine nucleoside binding,GO:0004329~formate-tetrahydrofolate ligase activity,GO:0005524~ATP binding,GO:0016879~ligase activity, forming carbon-nitrogen bonds,GO:0017076~purine nucleotide binding,GO:0030554~adenyl nucleotide binding,GO:0032553~ribonucleotide binding,GO:0032555~purine ribonucleotide binding,GO:0032559~adenyl ri…		14702039,
3251	HPRT1,	hypoxanthine phosphoribosyltransferase 1	2.4.2.8,	cytogenetic studies,lead toxicity,Lesch-Nyhan syndrome,lung cancer,smoking behavior,		HPRT-related gout,Lesch-Nyhan syndrome,	GO:0000287~magnesium ion binding,GO:0002054~nucleobase binding,GO:0002060~purine binding,GO:0004422~hypoxanthine phosphoribosyltransferase activity,GO:0016763~transferase activity, transferring pentosyl groups,GO:0042802~identical protein binding,GO:0042803~protein homodimerization activity,GO:0043167~ion binding,GO:0043169~cation binding,GO:0046872~metal ion binding,GO:0046983~protein dimerizati…	hsa00230:Purine metabolism,hsa00983:Drug metabolism,	10338013,10360366,11219770,11434773,11591653,11668636,11714443,11891689,12175903,12376523,12477932,12616531,12874812,1301916,14499622,14702039,14767555,1487231,15146465,15178494,15204312,15277709,15489334,15491638,1551676,15571220,15571222,15571223,15571224,15601998,15772651,15779006,15862283,15862284,15987524,15990111,16138897,16189514,16216473,16240158,16355393,16458330,16928426,16951156,170273…
51557	LGSN,	lengsin, lens protein with glutamine synthetase domain	1.4.1.3,				GO:0004356~glutamate-ammonia ligase activity,GO:0016211~ammonia ligase activity,GO:0016879~ligase activity, forming carbon-nitrogen bonds,GO:0016880~acid-ammonia (or amide) ligase activity,		12107412,12107413,12477932,14574404,15489334,16005676,16273301,17010935,17161372,
4190	Mdh1,	malate dehydrogenase 1, NAD (soluble)	1.1.1.37,				GO:0000166~nucleotide binding,GO:0004470~malic enzyme activity,GO:0016615~malate dehydrogenase activity,GO:0030060~L-malate dehydrogenase activity,GO:0048037~cofactor binding,GO:0050662~coenzyme binding,GO:0051287~NAD or NADH binding,	hsa00020:Citrate cycle (TCA cycle),hsa00620:Pyruvate metabolism,hsa00630:Glyoxylate and dicarboxylate metabolism,	10075524,10190973,12477932,15489334,15565635,15815621,18996102,19110265,19229245,2449162,2775751,3052244,7151307,7698769,7895732,8786100,9799840,
130752	Mdh1b,	malate dehydrogenase 1B, NAD (soluble)	1.1.1.-,				GO:0016615~malate dehydrogenase activity,		12477932,14702039,15489334,15815621,
4522	mthfd1,	methylenetetrahydrofolate dehydrogenase (NADP+ dependent) 1, methenyltetrahydrofolate cyclohydrolase, formyltetrahydrofolate synthetase	1.5.1.5,3.5.4.9,6.3.4.3,	abruptio placentae,bipolar disorder schizophrenia,breast cancer,breast cancer estrogen progesterone,cervical artery dissection, spontaneous,cleft lip with cleft palate cleft lip without cleft palate,colorectal cancer,colorectal cancer; folate, erythrocyte,drug hypersensitivity,folate; homocysteine,heart anomalies, congenital,leukemia,lung cancer,migraine,neural tube defects,omphalocele,pregnancy …		Abruptio placentae, susceptibility to,Spina bifida, folate-sensitive, susceptibility to,	GO:0000166~nucleotide binding,GO:0001882~nucleoside binding,GO:0001883~purine nucleoside binding,GO:0004329~formate-tetrahydrofolate ligase activity,GO:0004477~methenyltetrahydrofolate cyclohydrolase activity,GO:0004486~methylenetetrahydrofolate dehydrogenase activity,GO:0004488~methylenetetrahydrofolate dehydrogenase (NADP+) activity,GO:0005524~ATP binding,GO:0016155~formyltetrahydrofolate dehyd…	hsa00630:Glyoxylate and dicarboxylate metabolism,hsa00670:One carbon pool by folate,	10828945,12015164,12384833,12477932,12665801,14632302,14647408,15122597,15489334,15503105,15633187,15719048,15797993,15861780,15937947,15953655,16123074,16236726,16315005,16328059,16552426,16712703,17000706,17035141,17114913,17353931,17417062,17436311,17438114,17449906,17530705,17533396,17548676,17691219,17894836,18221821,18261183,18277167,18427977,18635682,18767138,18771981,18801628,18818748,189…
10797	mthfd2,	methylenetetrahydrofolate dehydrogenase (NADP+ dependent) 2, methenyltetrahydrofolate cyclohydrolase	1.5.1.15,3.5.4.9,				GO:0000287~magnesium ion binding,GO:0004477~methenyltetrahydrofolate cyclohydrolase activity,GO:0004486~methylenetetrahydrofolate dehydrogenase activity,GO:0004487~methylenetetrahydrofolate dehydrogenase (NAD+) activity,GO:0004488~methylenetetrahydrofolate dehydrogenase (NADP+) activity,GO:0016645~oxidoreductase activity, acting on the CH-NH group of donors,GO:0016646~oxidoreductase activity, act…	hsa00630:Glyoxylate and dicarboxylate metabolism,hsa00670:One carbon pool by folate,	12477932,15489334,15815621,16344560,18676680,18830263,19048631,19161160,2587219,8125298,8218174,8939898,9373149,9454603,
441024	Mthfd2l,	methylenetetrahydrofolate dehydrogenase (NADP+ dependent) 2-like	1.5.1.15,3.5.4.9,				GO:0000287~magnesium ion binding,GO:0004477~methenyltetrahydrofolate cyclohydrolase activity,GO:0004486~methylenetetrahydrofolate dehydrogenase activity,GO:0004487~methylenetetrahydrofolate dehydrogenase (NAD+) activity,GO:0016645~oxidoreductase activity, acting on the CH-NH group of donors,GO:0016646~oxidoreductase activity, acting on the CH-NH group of donors, NAD or NADP as acceptor,GO:0016814…		12477932,14702039,15489334,15815621,
84693	MCEE,	methylmalonyl CoA epimerase	5.1.99.1,			Methylmalonyl-CoA epimerase deficiency,	GO:0004493~methylmalonyl-CoA epimerase activity,GO:0016854~racemase and epimerase activity,	hsa00280:Valine, leucine and isoleucine degradation,hsa00640:Propanoate metabolism,	11481338,12477932,15489334,16697227,16752391,16843692,17823972,
64802	NMNAT1,	nicotinamide nucleotide adenylyltransferase 1	2.7.7.1,2.7.7.18,				GO:0000166~nucleotide binding,GO:0000287~magnesium ion binding,GO:0000309~nicotinamide-nucleotide adenylyltransferase activity,GO:0001882~nucleoside binding,GO:0001883~purine nucleoside binding,GO:0004515~nicotinate-nucleotide adenylyltransferase activity,GO:0005524~ATP binding,GO:0008270~zinc ion binding,GO:0016779~nucleotidyltransferase activity,GO:0017076~purine nucleotide binding,GO:0030554~a…	hsa00760:Nicotinate and nicotinamide metabolism,	11027696,11248244,11751893,11752792,11788603,11891043,11959140,12359228,12477932,12574164,14516279,14702039,15342556,15489334,16118205,17081983,17360427,17402747,19403820,8125298,9373149,
4830, 4831	Nme1,NME1-NME2,NME2,	non-metastatic cells 1, protein (NM23A) expressed in; NME1-NME2 readthrough transcript; non-metastatic cells 2, protein (NM23B) expressed in	2.7.4.6,	breast cancer,colorectal cancer,lymph node involvement and other histopathological indicators of high metastatic potential,		Neuroblastoma,	GO:0000166~nucleotide binding,GO:0000287~magnesium ion binding,GO:0001882~nucleoside binding,GO:0001883~purine nucleoside binding,GO:0003677~DNA binding,GO:0003700~transcription factor activity,GO:0004518~nuclease activity,GO:0004536~deoxyribonuclease activity,GO:0004550~nucleoside diphosphate kinase activity,GO:0005524~ATP binding,GO:0005525~GTP binding,GO:0008092~cytoskeletal protein binding,GO…	hsa00230:Purine metabolism,hsa00240:Pyrimidine metabolism,	10512675,10602478,10611312,10618642,11042679,11082283,11274357,11280768,11319942,11555662,11687967,11726210,11776896,11835509,11872741,11918081,11919189,11935309,11960382,11963831,11998956,12007505,12009894,12105213,12135660,12137595,12163590,12174914,12200143,12405283,12452062,12474051,12477932,12486122,12486123,12490715,12524539,12601555,12624546,12628186,12669312,12684753,12859952,12883690,129…
4832	nme3,	non-metastatic cells 3, protein expressed in	2.7.4.6,				GO:0000166~nucleotide binding,GO:0000287~magnesium ion binding,GO:0001882~nucleoside binding,GO:0001883~purine nucleoside binding,GO:0004550~nucleoside diphosphate kinase activity,GO:0005524~ATP binding,GO:0016776~phosphotransferase activity, phosphate group as acceptor,GO:0017076~purine nucleotide binding,GO:0019205~nucleobase, nucleoside, nucleotide kinase activity,GO:0030554~adenyl nucleotide …	hsa00230:Purine metabolism,hsa00240:Pyrimidine metabolism,	11042679,11157797,11277919,12477932,15489334,16169070,16189514,16537434,16713569,17900511,7638209,9067290,
4833	NME4,	non-metastatic cells 4, protein expressed in	2.7.4.6,				GO:0000166~nucleotide binding,GO:0000287~magnesium ion binding,GO:0001882~nucleoside binding,GO:0001883~purine nucleoside binding,GO:0004550~nucleoside diphosphate kinase activity,GO:0005524~ATP binding,GO:0016776~phosphotransferase activity, phosphate group as acceptor,GO:0017076~purine nucleotide binding,GO:0019205~nucleobase, nucleoside, nucleotide kinase activity,GO:0030554~adenyl nucleotide …	hsa00230:Purine metabolism,hsa00240:Pyrimidine metabolism,	10799505,11157797,11831846,12477932,14702039,15489334,15616553,16189514,18604718,9099850,
10201	Nme6,	non-metastatic cells 6, protein expressed in (nucleoside-diphosphate kinase)	2.7.4.6,				GO:0000166~nucleotide binding,GO:0000287~magnesium ion binding,GO:0001882~nucleoside binding,GO:0001883~purine nucleoside binding,GO:0004550~nucleoside diphosphate kinase activity,GO:0005524~ATP binding,GO:0016776~phosphotransferase activity, phosphate group as acceptor,GO:0017076~purine nucleotide binding,GO:0019205~nucleobase, nucleoside, nucleotide kinase activity,GO:0030554~adenyl nucleotide …	hsa00230:Purine metabolism,hsa00240:Pyrimidine metabolism,	10453732,10618642,12477932,14702039,15489334,16641997,8125298,9373149,
29922	NME7,	non-metastatic cells 7, protein expressed in (nucleoside-diphosphate kinase)	2.7.4.6,				GO:0000166~nucleotide binding,GO:0000287~magnesium ion binding,GO:0001882~nucleoside binding,GO:0001883~purine nucleoside binding,GO:0004550~nucleoside diphosphate kinase activity,GO:0005524~ATP binding,GO:0016776~phosphotransferase activity, phosphate group as acceptor,GO:0017076~purine nucleotide binding,GO:0019205~nucleobase, nucleoside, nucleotide kinase activity,GO:0030554~adenyl nucleotide …	hsa00230:Purine metabolism,hsa00240:Pyrimidine metabolism,	11768308,12477932,14702039,15489334,16189514,16710414,17363702,19064610,19240061,
4860	pnp,	nucleoside phosphorylase	2.4.2.1,	Alzheimer's disease cognitive function,		Nucleoside phosphorylase deficiency, immunodeficiency due to,	GO:0001882~nucleoside binding,GO:0002054~nucleobase binding,GO:0002060~purine binding,GO:0004731~purine-nucleoside phosphorylase activity,GO:0008144~drug binding,GO:0016763~transferase activity, transferring pentosyl groups,GO:0042301~phosphate binding,GO:0043167~ion binding,GO:0043168~anion binding,	hsa00230:Purine metabolism,hsa00240:Pyrimidine metabolism,hsa00760:Nicotinate and nicotinamide metabolism,	100152,10884411,11453975,11964161,12068295,12180982,12477932,12914785,12914786,12928150,13679061,13679062,1384322,14680831,14702039,14706628,14982926,15047506,15489334,15571269,15582582,1560016,15983407,16154528,16169070,16930574,16964310,17221831,17407325,1763067,17639373,18281956,18281957,18790691,18938130,18946041,19001417,19191546,1923769,1931007,2104852,3029074,6087295,6771276,8931706,906775…
5105	PCK1,	phosphoenolpyruvate carboxykinase 1 (soluble)	4.1.1.32,	Alzheimer's Disease,atherosclerosis,diabetes, type 2,triglycerides; diabetes, type 2; lipoprotein,	pol:integrase,		GO:0000166~nucleotide binding,GO:0000287~magnesium ion binding,GO:0001882~nucleoside binding,GO:0001883~purine nucleoside binding,GO:0004611~phosphoenolpyruvate carboxykinase activity,GO:0004613~phosphoenolpyruvate carboxykinase (GTP) activity,GO:0005525~GTP binding,GO:0016831~carboxy-lyase activity,GO:0017076~purine nucleotide binding,GO:0019001~guanyl nucleotide binding,GO:0019003~GDP binding,G…	hsa00010:Glycolysis / Gluconeogenesis,hsa00020:Citrate cycle (TCA cycle),hsa00620:Pyruvate metabolism,hsa03320:PPAR signaling pathway,hsa04910:Insulin signaling pathway,hsa04920:Adipocytokine signaling pathway,	11689615,11780052,11851336,11997389,12237288,12324453,12477932,14552798,14744869,14764811,1492743,15046742,15489334,15951444,16132948,16144962,16282543,16341674,16344560,1657985,16620271,16978381,17192490,17440948,17495004,17532214,18029348,18460190,18492826,18660489,18801732,18830724,18996102,19021757,19056482,19070910,19329064,2993287,8325643,8432541,8490617,8547315,	11689615,
5211	PFKL,	phosphofructokinase, liver	2.7.1.11,			Hemolytic anemia due to phosphofructokinase deficiency,	GO:0000166~nucleotide binding,GO:0000287~magnesium ion binding,GO:0001882~nucleoside binding,GO:0001883~purine nucleoside binding,GO:0003872~6-phosphofructokinase activity,GO:0005524~ATP binding,GO:0005529~sugar binding,GO:0008443~phosphofructokinase activity,GO:0017076~purine nucleotide binding,GO:0019200~carbohydrate kinase activity,GO:0019899~enzyme binding,GO:0019900~kinase binding,GO:0030246…	hsa00010:Glycolysis / Gluconeogenesis,hsa00030:Pentose phosphate pathway,hsa00051:Fructose and mannose metabolism,hsa00052:Galactose metabolism,	10830953,12477932,12665801,12840015,1446073,14702039,15231748,15489334,15592455,1565613,156693,16169070,16189514,16713569,16780588,18254975,18669648,18691976,18996102,2139864,2533063,2944814,2948503,6227635,6444532,6444721,6445244,6455664,8780720,8931492,
5213	PFKM,	phosphofructokinase, muscle	2.7.1.11,	Tarui disease,		Glycogen storage disease VII,	GO:0000166~nucleotide binding,GO:0000287~magnesium ion binding,GO:0001882~nucleoside binding,GO:0001883~purine nucleoside binding,GO:0003872~6-phosphofructokinase activity,GO:0005524~ATP binding,GO:0005529~sugar binding,GO:0008022~protein C-terminus binding,GO:0008443~phosphofructokinase activity,GO:0016208~AMP binding,GO:0017076~purine nucleotide binding,GO:0019200~carbohydrate kinase activity,G…	hsa00010:Glycolysis / Gluconeogenesis,hsa00030:Pentose phosphate pathway,hsa00051:Fructose and mannose metabolism,hsa00052:Galactose metabolism,	10187848,12432079,12477932,125160,12649290,14760703,15020257,15489334,16344560,17287340,17544406,18029348,1825608,1833270,18996102,19019082,19165527,2140567,2140573,2526044,2526045,2822475,6444532,6444721,6459054,7479776,7513946,7550225,7825568,8444874,8661033,8780720,8889589,9252390,9389749,9443500,
5214	pfkp,	phosphofructokinase, platelet	2.7.1.11,				GO:0000166~nucleotide binding,GO:0000287~magnesium ion binding,GO:0001882~nucleoside binding,GO:0001883~purine nucleoside binding,GO:0003872~6-phosphofructokinase activity,GO:0005524~ATP binding,GO:0005529~sugar binding,GO:0008443~phosphofructokinase activity,GO:0017076~purine nucleotide binding,GO:0019200~carbohydrate kinase activity,GO:0030246~carbohydrate binding,GO:0030554~adenyl nucleotide b…	hsa00010:Glycolysis / Gluconeogenesis,hsa00030:Pentose phosphate pathway,hsa00051:Fructose and mannose metabolism,hsa00052:Galactose metabolism,	12438565,12477932,12963966,14702039,14760703,15302935,1533608,15489334,15592455,156568,156693,15716112,16964243,17353931,17544406,17658951,1834056,18669648,18682847,18691976,18996102,2822475,6444721,6451249,8117307,8889548,
5236	pgm1,	phosphoglucomutase 1	5.4.2.2,	atherosclerosis, coronary; tuberculosis,diabetes, type 1,tuberculosis,			GO:0000287~magnesium ion binding,GO:0004614~phosphoglucomutase activity,GO:0016866~intramolecular transferase activity,GO:0016868~intramolecular transferase activity, phosphotransferases,GO:0043167~ion binding,GO:0043169~cation binding,GO:0046872~metal ion binding,	hsa00010:Glycolysis / Gluconeogenesis,hsa00030:Pentose phosphate pathway,hsa00052:Galactose metabolism,hsa00500:Starch and sucrose metabolism,hsa00520:Amino sugar and nucleotide sugar metabolism,	10441333,11771313,11785295,11963573,12477932,12608294,12942785,1530890,15378030,15489334,15522220,1602151,16710414,17924679,18091362,18187866,18495743,18669648,3159642,4517931,621091,7902567,7902568,8257433,8586438,8631316,8894274,
5223	pgam1,	phosphoglycerate mutase 1 (brain)	3.1.3.13,5.4.2.1,5.4.2.4,				GO:0004082~bisphosphoglycerate mutase activity,GO:0004083~2,3-bisphospho-D-glycerate 2-phosphohydrolase activity,GO:0004619~phosphoglycerate mutase activity,GO:0016791~phosphatase activity,GO:0016866~intramolecular transferase activity,GO:0016868~intramolecular transferase activity, phosphotransferases,GO:0019899~enzyme binding,GO:0019900~kinase binding,GO:0019901~protein kinase binding,GO:003441…	hsa00010:Glycolysis / Gluconeogenesis,	12189148,12477932,14702039,15388943,15489334,15592455,15710582,15883004,16169070,16881065,18083107,18669648,19405953,2822696,2846553,2846554,6282177,8125298,8619474,9110174,9150946,9373149,
5224	PGAM2,	phosphoglycerate mutase 2 (muscle)	3.1.3.13,5.4.2.1,5.4.2.4,			Myopathy due to phosphoglycerate mutase deficiency,	GO:0004082~bisphosphoglycerate mutase activity,GO:0004083~2,3-bisphospho-D-glycerate 2-phosphohydrolase activity,GO:0004619~phosphoglycerate mutase activity,GO:0016791~phosphatase activity,GO:0016866~intramolecular transferase activity,GO:0016868~intramolecular transferase activity, phosphotransferases,GO:0034416~bisphosphoglycerate phosphatase activity,GO:0046538~2,3-bisphosphoglycerate-dependen…	hsa00010:Glycolysis / Gluconeogenesis,	10545043,12477932,15489334,17370265,2145198,2153628,2549058,2822696,6262916,8447317,
5092	Pcbd1,	pterin-4 alpha-carbinolamine dehydratase/dimerization cofactor of hepatocyte nuclear factor 1 alpha	4.2.1.96,	diabetes, type 2; beta-cell function,		Hyperphenylalaninemia due to pterin-4a-carbinolamine dehydratase deficiency,Hyperphenylalaninemia, BH4-deficient, D,	GO:0003712~transcription cofactor activity,GO:0003713~transcription coactivator activity,GO:0004505~phenylalanine 4-monooxygenase activity,GO:0008124~4-alpha-hydroxytetrahydrobiopterin dehydratase activity,GO:0008134~transcription factor binding,GO:0016563~transcription activator activity,GO:0016714~oxidoreductase activity, acting on paired donors, with incorporation or reduction of molecular oxy…		10098606,10727395,11461190,11668623,11937441,11980910,12477932,12565907,15489334,15740590,16189514,16423549,17353931,1763325,7725101,7763270,8188266,8352282,8444860,8444860],8486378,8504250,8618906,8682201,8889548,8897596,9092652,9391049,9585615,9760199,
5160	Pdha1,	pyruvate dehydrogenase (lipoamide) alpha 1	1.2.4.1,			Leigh syndrome, X-linked,pyruvate decarboxylase deficiency,Pyruvate dehydrogenase deficiency,	GO:0004738~pyruvate dehydrogenase activity,GO:0004739~pyruvate dehydrogenase (acetyl-transferring) activity,GO:0016624~oxidoreductase activity, acting on the aldehyde or oxo group of donors, disulfide as acceptor,	hsa00010:Glycolysis / Gluconeogenesis,hsa00020:Citrate cycle (TCA cycle),hsa00290:Valine, leucine and isoleucine biosynthesis,hsa00620:Pyruvate metabolism,hsa00650:Butanoate metabolism,	10077682,11485553,11486000,12477932,12651851,12676647,1293379,1301207,1338114,14638692,14708897,15302935,15489334,1551669,15861126,16169070,16344560,16713755,16967364,17065338,17081983,17353931,17474719,17487921,17947500,17957032,18023225,18083107,18088087,18220336,18398624,18691976,19081061,1909401,2227443,2537010,2737678,2745444,2748588,2828359,3034892,3422424,7545958,7573035,7757088,7782287,78…
5161	pdhA2,	pyruvate dehydrogenase (lipoamide) alpha 2	1.2.4.1,				GO:0004738~pyruvate dehydrogenase activity,GO:0004739~pyruvate dehydrogenase (acetyl-transferring) activity,GO:0016624~oxidoreductase activity, acting on the aldehyde or oxo group of donors, disulfide as acceptor,	hsa00010:Glycolysis / Gluconeogenesis,hsa00020:Citrate cycle (TCA cycle),hsa00290:Valine, leucine and isoleucine biosynthesis,hsa00620:Pyruvate metabolism,hsa00650:Butanoate metabolism,	10542321,11181995,11577086,11673873,12477932,14702039,15489334,1581363,17081983,18083107,18088087,18669648,2122529,2249846,7864652,
5162	pdhB,	pyruvate dehydrogenase (lipoamide) beta	1.2.4.1,			Pyruvate dehydrogenase E1-beta deficiency,	GO:0004738~pyruvate dehydrogenase activity,GO:0004739~pyruvate dehydrogenase (acetyl-transferring) activity,GO:0016624~oxidoreductase activity, acting on the aldehyde or oxo group of donors, disulfide as acceptor,	hsa00010:Glycolysis / Gluconeogenesis,hsa00020:Citrate cycle (TCA cycle),hsa00290:Valine, leucine and isoleucine biosynthesis,hsa00620:Pyruvate metabolism,hsa00650:Butanoate metabolism,	11076863,11230166,11577086,12477932,12651851,14638692,15138885,15489334,15489336,16381901,1702713,17474719,17923481,18164639,18206651,18468620,19081061,1967901,2295468,2323578,2376596,2377599,2829898,3422424,7864652,7895732,8125298,9373149,9824306,
5313	PKLR,	pyruvate kinase, liver and RBC	2.7.1.40,	chronic hemolytic anemia,diabetes, type 2,hereditary hemolytic anemia.,polycystic kidney disease,		Adenosine triphosphate, elevated, of erythrocytes,Pyruvate kinase deficiency,	GO:0000166~nucleotide binding,GO:0000287~magnesium ion binding,GO:0001882~nucleoside binding,GO:0001883~purine nucleoside binding,GO:0004743~pyruvate kinase activity,GO:0005524~ATP binding,GO:0017076~purine nucleotide binding,GO:0030554~adenyl nucleotide binding,GO:0030955~potassium ion binding,GO:0031420~alkali metal ion binding,GO:0032553~ribonucleotide binding,GO:0032555~purine ribonucleotide …	hsa00010:Glycolysis / Gluconeogenesis,hsa00230:Purine metabolism,hsa00620:Pyruvate metabolism,hsa04910:Insulin signaling pathway,hsa04930:Type II diabetes mellitus,hsa04950:Maturity onset diabetes of the young,	10087985,10772876,11328279,11459427,11668614,11698298,11916152,11960989,12006652,12107439,12196482,12393511,12477932,1445295,1536957,15489334,15491302,15727904,1602151,16289162,16540430,17081983,17360088,17574881,17977029,18269685,18420493,18460648,18683378,18698090,18726918,18759866,18840520,1896471,18996102,19085939,19111066,19320443,19372549,2018831,3126495,3378452,3566732,7706479,8125298,8161…
5860	QDPR,	quinoid dihydropteridine reductase	1.5.1.34,			Hyperphenylalaninemia due to dihydropteridine reductase deficiency,Hyperphenylalaninemia, BH4-deficient, C,Phenylketonuria due to dihydropteridine reductase deficiency,	GO:0004155~6,7-dihydropteridine reductase activity,GO:0009055~electron carrier activity,GO:0016645~oxidoreductase activity, acting on the CH-NH group of donors,GO:0016646~oxidoreductase activity, acting on the CH-NH group of donors, NAD or NADP as acceptor,	hsa00790:Folate biosynthesis,	10408783,11076863,11153907,11256614,1160969,11937441,12477932,14718574,15009710,15489334,15489336,16341674,16381901,17188538,18444252,19027726,19405953,2116088,2330583,3031582,3033643,3587329,3666748,3711039,3718470,6746636,6797415,7627180,8125298,8137944,8262916,8326489,9373149,9427141,9744478,
157506	RDH10,	retinol dehydrogenase 10 (all-trans)	1.1.1.-,1.1.1.n2,				GO:0004745~retinol dehydrogenase activity,	hsa00830:Retinol metabolism,	12407145,12477932,12975309,14596915,15489334,17218779,18502750,19027726,19102727,
51109	rdh11,	retinol dehydrogenase 11 (all-trans/9-cis/11-cis)	1.1.1.-,				GO:0004745~retinol dehydrogenase activity,	hsa00830:Retinol metabolism,	10810093,11245473,12036956,12226107,12477932,12508121,12532453,14674758,14702039,15489334,16303743,17249616,17286855,18187866,19027726,8018917,
145226	RDH12,	retinol dehydrogenase 12 (all-trans/9-cis/11-cis)	1.1.1.-,	Leber congenital amaurosis/LCA,		Leber congenital amaurosis 13,Leber congenital amaurosis, type III,	GO:0004745~retinol dehydrogenase activity,	hsa00830:Retinol metabolism,	12226107,12477932,14702039,15258582,15322982,15489334,15865448,17197551,17389517,17512723,17512964,18779497,19011012,19027726,9799089,
112724	RDH13,	retinol dehydrogenase 13 (all-trans/9-cis)	1.1.1.-,						12226107,12477932,12975309,14702039,15489334,16303743,16344560,18039331,19027726,
57665, 93034	NT5C1B,RDH14,	retinol dehydrogenase 14 (all-trans/9-cis/11-cis); 5'-nucleotidase, cytosolic IB	1.1.1.-,3.1.3.5,				GO:0000166~nucleotide binding,GO:0000287~magnesium ion binding,GO:0008252~nucleotidase activity,GO:0008253~5'-nucleotidase activity,GO:0016791~phosphatase activity,GO:0043167~ion binding,GO:0043169~cation binding,GO:0046872~metal ion binding,	hsa00230:Purine metabolism,hsa00240:Pyrimidine metabolism,hsa00760:Nicotinate and nicotinamide metabolism,	11076863,11256614,11690631,12226107,12435598,12477932,12766061,12975309,14702039,15489334,15489336,15815621,16381901,19027726,
50700	Rdh8,	retinol dehydrogenase 8 (all-trans)	1.1.1.n2,				GO:0004303~estradiol 17-beta-dehydrogenase activity,GO:0004745~retinol dehydrogenase activity,GO:0016229~steroid dehydrogenase activity,GO:0033764~steroid dehydrogenase activity, acting on the CH-OH group of donors, NAD or NADP as acceptor,	hsa00830:Retinol metabolism,	10753906,11710234,12226107,14702039,15028754,15322982,15755727,19027726,9667000,
6240	Rrm1,	ribonucleotide reductase M1	1.17.4.1,	breast cancer neutropenia,lung cancer,			GO:0000166~nucleotide binding,GO:0001882~nucleoside binding,GO:0001883~purine nucleoside binding,GO:0004748~ribonucleoside-diphosphate reductase activity,GO:0005524~ATP binding,GO:0016725~oxidoreductase activity, acting on CH or CH2 groups,GO:0016728~oxidoreductase activity, acting on CH or CH2 groups, disulfide as acceptor,GO:0017076~purine nucleotide binding,GO:0030554~adenyl nucleotide binding…	hsa00230:Purine metabolism,hsa00240:Pyrimidine metabolism,hsa00480:Glutathione metabolism,	10441745,11517226,11781084,12477932,12578384,12615712,12687015,12789263,14583450,14702039,14729598,15172981,15277258,15324660,15342556,15489334,16169070,1627826,16376858,16476973,16481328,1677928,16966686,17064812,17065054,17131328,17486094,17602053,1840662,18414411,18483375,18494946,18636187,19002265,19304340,3044582,3275546,3891388,7557993,8125298,8188248,8386696,9373149,9933563,
6241	rrm2,	ribonucleotide reductase M2 polypeptide	1.17.4.1,				GO:0004748~ribonucleoside-diphosphate reductase activity,GO:0005506~iron ion binding,GO:0016725~oxidoreductase activity, acting on CH or CH2 groups,GO:0016728~oxidoreductase activity, acting on CH or CH2 groups, disulfide as acceptor,GO:0043167~ion binding,GO:0043169~cation binding,GO:0046872~metal ion binding,GO:0046914~transition metal ion binding,	hsa00230:Purine metabolism,hsa00240:Pyrimidine metabolism,hsa00480:Glutathione metabolism,hsa04115:p53 signaling pathway,	10631117,11517226,11781084,11978967,11978970,12477932,12615712,12655059,12694192,14583450,14661056,14702039,14729598,15096505,15489334,15815621,1627826,16376858,16964243,17222798,17486094,17693683,17924679,18187866,18278438,18414411,18669648,18691976,18941749,19002265,19082948,19250552,3311968,7937751,9990288,
195814	SDR16C5,	short chain dehydrogenase/reductase family 16C, member 5	1.1.1.-,	psoriasis,		Identification of ten loci associated with height highlights new biological pathways in human growth,Many sequence variants affecting diversity of adult human height,			12372410,12477932,14702039,15457346,15489334,18391950,18391951,
5315	LOC652797,PKM2,	similar to Pyruvate kinase, isozymes M1/M2 (Pyruvate kinase muscle isozyme) (Cytosolic thyroid hormone-binding protein) (CTHBP) (THBP1); pyruvate kinase, muscle	2.7.1.40,				GO:0000166~nucleotide binding,GO:0000287~magnesium ion binding,GO:0001882~nucleoside binding,GO:0001883~purine nucleoside binding,GO:0004743~pyruvate kinase activity,GO:0005524~ATP binding,GO:0017076~purine nucleotide binding,GO:0030554~adenyl nucleotide binding,GO:0030955~potassium ion binding,GO:0031420~alkali metal ion binding,GO:0032553~ribonucleotide binding,GO:0032555~purine ribonucleotide …	hsa00010:Glycolysis / Gluconeogenesis,hsa00230:Purine metabolism,hsa00620:Pyruvate metabolism,hsa04930:Type II diabetes mellitus,	11162730,11256614,11895152,11960989,12477932,12620389,12650930,12665801,12820312,12820320,12820337,14702039,15128873,15231747,15294093,15489334,15592455,15862967,15952740,15996096,16132722,16572171,16964243,17011640,17081983,17220478,17287340,17406361,17414054,17525332,17620599,18088087,18187866,18298799,18337815,18394773,18464261,18519040,1854723,18669648,18691976,18789002,18996102,19097497,1926…
6510	SLC1A5,	solute carrier family 1 (neutral amino acid transporter), member 5		cystic fibrosis,			GO:0005275~amine transmembrane transporter activity,GO:0005310~dicarboxylic acid transmembrane transporter activity,GO:0005343~organic acid:sodium symporter activity,GO:0008509~anion transmembrane transporter activity,GO:0015171~amino acid transmembrane transporter activity,GO:0015175~neutral amino acid transmembrane transporter activity,GO:0015293~symporter activity,GO:0015294~solute:cation symp…		10051606,10196349,11350958,11781704,12050356,12175968,12477932,12555937,12584318,12757936,14520239,14702039,15489334,15845389,15848195,16197915,16344560,16435221,16516348,16820059,17081065,17081983,17329400,17353931,17676482,18157695,18638388,18669648,8702519,
6566	SLC16A1,	solute carrier family 16, member 1 (monocarboxylic acid transporter 1)				Erythrocyte lactate transporter defect,Hyperinsulinemic hypoglycemia, familial, 7,	GO:0008028~monocarboxylic acid transmembrane transporter activity,GO:0015130~mevalonate transmembrane transporter activity,GO:0015293~symporter activity,GO:0015355~secondary active monocarboxylate transmembrane transporter activity,		10471310,10562613,10590411,10921872,11820324,11882670,11944921,11953883,12477932,12479094,12657613,12739169,12759536,12949353,1429658,14702039,14724187,15135232,15489334,15765403,15804185,15901598,16150873,16370372,16403470,16408234,16441976,17016429,17081983,17082373,17182800,17353931,17701893,17974005,18079261,18188595,18539591,18669648,18691976,18832090,19033536,19033663,7835905,8124722,888954…
9123	SLC16A3,	solute carrier family 16, member 3 (monocarboxylic acid transporter 4)					GO:0008028~monocarboxylic acid transmembrane transporter activity,GO:0015293~symporter activity,GO:0015355~secondary active monocarboxylate transmembrane transporter activity,		10510291,10921872,12477932,12657613,12739169,14702039,15489334,17081983,17502341,18669648,18691976,8125298,9373149,9425115,
9194	slc16a7,	solute carrier family 16, member 7 (monocarboxylic acid transporter 2)					GO:0005477~pyruvate secondary active transmembrane transporter activity,GO:0008028~monocarboxylic acid transmembrane transporter activity,GO:0015293~symporter activity,GO:0015355~secondary active monocarboxylate transmembrane transporter activity,GO:0050833~pyruvate transmembrane transporter activity,		12115955,12477932,12739169,14757520,15489334,17502341,18188595,18598673,9786900,
23539	SLC16A8,	solute carrier family 16, member 8 (monocarboxylic acid transporter 3)					GO:0008028~monocarboxylic acid transmembrane transporter activity,GO:0015129~lactate transmembrane transporter activity,GO:0015293~symporter activity,GO:0015355~secondary active monocarboxylate transmembrane transporter activity,		10493836,10591208,12657613,12739169,16169070,8889548,
6513	slc2a1,	solute carrier family 2 (facilitated glucose transporter), member 1		diabetes, type 2,Diabetic microvascular complications,diabetic nephropathy.,nephropathy,nephropathy in other diseases,nephropathy, diabetic,		Dystonia-17,Dystonia-18,Glucose transport defect, blood-brain barrier,Paroxysmal exertion-induced dyskinesia and hemolytic anemia,	GO:0005351~sugar:hydrogen symporter activity,GO:0005355~glucose transmembrane transporter activity,GO:0005402~cation:sugar symporter activity,GO:0015145~monosaccharide transmembrane transporter activity,GO:0015149~hexose transmembrane transporter activity,GO:0015293~symporter activity,GO:0015294~solute:cation symporter activity,GO:0015295~solute:hydrogen symporter activity,GO:0019899~enzyme bindi…	hsa04920:Adipocytokine signaling pathway,hsa05200:Pathways in cancer,hsa05211:Renal cell carcinoma,	10086067,10198040,10227690,10562431,10655495,10759149,10980529,11007796,11136715,11168944,11231353,11296192,11425315,11477169,11603379,11681785,11747430,11774318,11836704,11842083,11920478,11953883,11991658,12064911,12086959,12112827,12122099,12133004,12145475,12325075,12379105,12379106,12477932,12554125,12583599,12673735,12752470,12849991,12942120,12969152,14605501,14622599,14674124,14688257,147…
81031	SLC2A10,	solute carrier family 2 (facilitated glucose transporter), member 10		diabetes, type 2,insulin,		Arterial tortuosity syndrome,	GO:0005351~sugar:hydrogen symporter activity,GO:0005402~cation:sugar symporter activity,GO:0015293~symporter activity,GO:0015294~solute:cation symporter activity,GO:0015295~solute:hydrogen symporter activity,GO:0051119~sugar transmembrane transporter activity,		11247674,11592815,11780052,12477932,12554125,12890477,12941788,14702039,15489334,15679832,15936967,15975113,16051383,16336637,16550171,16586067,17935213,18565096,
6514	SLC2A2,	solute carrier family 2 (facilitated glucose transporter), member 2		diabetes, type 2,nephropathy, diabetic,		Diabetes mellitus, noninsulin-dependent,Fanconi-Bickel syndrome,	GO:0005158~insulin receptor binding,GO:0005351~sugar:hydrogen symporter activity,GO:0005355~glucose transmembrane transporter activity,GO:0005402~cation:sugar symporter activity,GO:0015145~monosaccharide transmembrane transporter activity,GO:0015149~hexose transmembrane transporter activity,GO:0015293~symporter activity,GO:0015294~solute:cation symporter activity,GO:0015295~solute:hydrogen sympor…	hsa04930:Type II diabetes mellitus,hsa04950:Maturity onset diabetes of the young,	10697967,10987651,11044475,11247674,11344224,11592815,11810292,11978637,11988093,12017192,12477932,13480676,14551916,14614558,14702039,15009676,15489334,15983230,17065357,17141226,17192490,17204838,17636114,18220613,18239936,18349384,1852621,1862003,19269875,3399500,7593414,7593639,8027028,8063045,8482435,8626492,8923459,9266402,9354798,9686354,
6515	SLC2A3,	solute carrier family 2 (facilitated glucose transporter), member 3					GO:0005351~sugar:hydrogen symporter activity,GO:0005355~glucose transmembrane transporter activity,GO:0005402~cation:sugar symporter activity,GO:0015145~monosaccharide transmembrane transporter activity,GO:0015149~hexose transmembrane transporter activity,GO:0015293~symporter activity,GO:0015294~solute:cation symporter activity,GO:0015295~solute:hydrogen symporter activity,GO:0051119~sugar transm…		10086067,11991658,12064911,12112827,12397394,12477932,12554125,12583599,1417839,14757434,15489334,16049004,16125330,16136514,16303743,1695905,17442736,17559076,17611657,17920708,18029348,18172662,18299470,18401196,18764953,18802725,19261894,3170580,7502272,9253355,9477959,
29988	SLC2A8,	solute carrier family 2 (facilitated glucose transporter), member 8					GO:0005351~sugar:hydrogen symporter activity,GO:0005355~glucose transmembrane transporter activity,GO:0005402~cation:sugar symporter activity,GO:0005529~sugar binding,GO:0005536~glucose binding,GO:0008493~tetracycline transporter activity,GO:0015145~monosaccharide transmembrane transporter activity,GO:0015149~hexose transmembrane transporter activity,GO:0015238~drug transporter activity,GO:001529…		10671487,10821868,11845330,12477932,12554125,15489334,16723738,
6584	slc22a5,	solute carrier family 22 (organic cation/carnitine transporter), member 5		cholangitis, sclerosing,Crohn's disease,Crohn's disease inflammatory bowel disease ulcerative colitis,Crohn's disease ulcerative colitis,Crohn's disease; ulcerative colitis,Crohn's disease; ulcerative colitis; inflammatory bowel disease,diabetes, type 1,left ventricular hypertrophy,perianal disease,psoriasis,psoriasis; arthritis, psoriatic; arthritis, inflammatory,rheumatoid arthritis,ulcerative …		Carnitine deficiency, systemic primary,	GO:0000166~nucleotide binding,GO:0001882~nucleoside binding,GO:0001883~purine nucleoside binding,GO:0005275~amine transmembrane transporter activity,GO:0005524~ATP binding,GO:0015101~organic cation transmembrane transporter activity,GO:0015226~carnitine transporter activity,GO:0015238~drug transporter activity,GO:0015293~symporter activity,GO:0015651~quaternary ammonium group transmembrane transp…		10072434,10425211,10454528,10480371,10545605,10559218,10612840,10679939,12183691,12408185,12477932,12684216,12802501,14506273,14665638,14684825,14702039,15107849,15238359,15303004,15486076,15487009,15489334,15499185,15523054,15647998,15685536,15714519,15955786,16255050,16333318,16344053,16344054,16344560,16361305,16373276,16437728,16441470,16469794,16490820,16519742,16652416,16670523,16771961,167…
83733	Slc25a18,	solute carrier family 25 (mitochondrial carrier), member 18					GO:0015293~symporter activity,		11381032,11566871,11897791,12477932,14702039,15461802,15489334,
8604	slc25a12,	solute carrier family 25 (mitochondrial carrier, Aralar), member 12		autism,			GO:0005275~amine transmembrane transporter activity,GO:0005313~L-glutamate transmembrane transporter activity,GO:0005509~calcium ion binding,GO:0015171~amino acid transmembrane transporter activity,GO:0015172~acidic amino acid transmembrane transporter activity,GO:0015179~L-amino acid transmembrane transporter activity,GO:0015183~L-aspartate transmembrane transporter activity,GO:0043167~ion bindi…		10369257,10702666,10965105,11566871,12477932,14702039,15056512,15489334,15494407,15815621,16122696,16205742,16263864,16648338,17151801,17237342,17353931,17497669,17693006,17894412,18180767,18348195,18607376,18996845,19058789,19360665,19401682,9722566,
79751	SLC25A22,	solute carrier family 25 (mitochondrial carrier: glutamate), member 22				Epilepsy, neonatal myoclonic, with suppression-burst pattern,	GO:0005275~amine transmembrane transporter activity,GO:0005313~L-glutamate transmembrane transporter activity,GO:0015171~amino acid transmembrane transporter activity,GO:0015172~acidic amino acid transmembrane transporter activity,GO:0015179~L-amino acid transmembrane transporter activity,GO:0015293~symporter activity,		11566871,11897791,12477932,14598172,14702039,15489334,15592994,17353931,
291	SLC25A4,	solute carrier family 25 (mitochondrial carrier; adenine nucleotide translocator), member 4		ophthalmoplegia Parkinson's disease,	vpr:Vpr,	Progressive external ophthalmoplegia with mitochondrial DNA deletions,progressive external ophthalmoplegia with mitochondrial DNA deletions 1,progressive external ophthalmoplegia with mitochondrial DNA deletions, autosomal dominant, 2,	GO:0005345~purine transmembrane transporter activity,GO:0005471~ATP:ADP antiporter activity,GO:0015205~nucleobase transmembrane transporter activity,GO:0015207~adenine transmembrane transporter activity,GO:0015297~antiporter activity,GO:0015300~solute:solute antiporter activity,GO:0015932~nucleobase, nucleoside, nucleotide and nucleic acid transmembrane transporter activity,	hsa04020:Calcium signaling pathway,hsa05012:Parkinson's disease,hsa05016:Huntington's disease,	10364542,10620603,10926541,11175251,11181702,11193032,11756592,11756613,11809823,12039962,12112115,12140186,12149099,12450408,12477932,12565915,12707443,12750393,12750404,14729611,15033717,15142377,15231833,15489334,15551024,15638722,15725353,15792871,15817944,1582253,16020522,16107323,16120388,16155110,16354571,16429131,16492162,16507998,16556444,16887100,17420318,18083107,18504126,18575922,1885…	10620603,11175251,11181702,11193032,12750393,12750404,15142377,15638722,15725353,15817944,15832179,16120388,16354571,16429131,16492162,16511342,
292	SLC25A5,SLC25A5P8,	solute carrier family 25 (mitochondrial carrier; adenine nucleotide translocator), member 5; solute carrier family 25 (mitochondrial carrier; adenine nucleotide translocator), member 5 pseudogene 8					GO:0005345~purine transmembrane transporter activity,GO:0015205~nucleobase transmembrane transporter activity,GO:0015207~adenine transmembrane transporter activity,GO:0015932~nucleobase, nucleoside, nucleotide and nucleic acid transmembrane transporter activity,	hsa04020:Calcium signaling pathway,hsa05012:Parkinson's disease,hsa05016:Huntington's disease,	10620603,11287411,11602586,12450408,12477932,12777383,14598172,14743216,15486956,15489334,15772651,16107323,16120388,18063578,18083107,18215124,18267033,2157297,2168878,2829183,3031073,7713517,8918809,9315697,9698557,
293	SLC25A6,	solute carrier family 25 (mitochondrial carrier; adenine nucleotide translocator), member 6					GO:0005471~ATP:ADP antiporter activity,GO:0015297~antiporter activity,GO:0015300~solute:solute antiporter activity,	hsa04020:Calcium signaling pathway,hsa05012:Parkinson's disease,hsa05016:Huntington's disease,	10926541,11756613,11872176,12112115,12450408,12477932,12707443,14726512,14743216,14746803,15033708,15063741,15489334,16120388,16169070,16189514,16201016,16556444,16930576,17220478,17855512,18083107,18691976,19111545,2541251,2547778,2823266,2829183,8486369,8490661,8619474,9110174,
8402	Slc25a11,	solute carrier family 25 (mitochondrial carrier; oxoglutarate carrier), member 11					GO:0005310~dicarboxylic acid transmembrane transporter activity,GO:0008509~anion transmembrane transporter activity,GO:0015140~malate transmembrane transporter activity,GO:0015297~antiporter activity,GO:0015300~solute:solute antiporter activity,GO:0015301~anion:anion antiporter activity,GO:0015367~oxoglutarate:malate antiporter activity,GO:0015556~C4-dicarboxylate transmembrane transporter activi…		10072597,12477932,12939596,1457818,15489334,16169070,16920706,8597574,8619474,8769314,9110174,9639574,
10165	SLC25A13,	solute carrier family 25, member 13 (citrin)		citrin deficiency,citrullinemia, adult-onset type II,citrullinemia, adult-onset type II; hepatitis, neonatal associated with cholestasis,		Citrullinemia, adult-onset type II,Citrullinemia, type II, neonatal-onset,	GO:0005275~amine transmembrane transporter activity,GO:0005313~L-glutamate transmembrane transporter activity,GO:0005509~calcium ion binding,GO:0015171~amino acid transmembrane transporter activity,GO:0015172~acidic amino acid transmembrane transporter activity,GO:0015179~L-amino acid transmembrane transporter activity,GO:0015183~L-aspartate transmembrane transporter activity,GO:0043167~ion bindi…		10369257,10610724,10642534,11153906,11281457,11343052,11432966,11566871,11793471,12111366,12424587,12477932,12851387,12853948,15489334,16059747,16278034,16344560,16928234,17000460,17092749,17982687,18273444,18392553,18620775,19036621,19232506,19401682,8125298,9373149,
3177	Slc29a2,	solute carrier family 29 (nucleoside transporters), member 2					GO:0005337~nucleoside transmembrane transporter activity,GO:0015932~nucleobase, nucleoside, nucleotide and nucleic acid transmembrane transporter activity,		12006583,12411296,12477932,12527552,12590919,12820662,12838422,14612157,14702039,15386342,15489334,15644498,15649894,16214850,16924660,17921321,17926640,18635603,18703227,18945750,19105964,7639753,9192854,9396714,9478986,
6520	SLC3A2,	solute carrier family 3 (activators of dibasic and neutral amino acid transport), member 2		melphalan pharmacokinetics melphalan side effects,	env:Envelope surface glycoprotein gp160, precursor,		GO:0005275~amine transmembrane transporter activity,GO:0005432~calcium:sodium antiporter activity,GO:0015171~amino acid transmembrane transporter activity,GO:0015175~neutral amino acid transmembrane transporter activity,GO:0015297~antiporter activity,GO:0015298~solute:cation antiporter activity,GO:0015300~solute:solute antiporter activity,GO:0015368~calcium:cation antiporter activity,GO:0015491~c…		10506149,10574970,10631289,10673541,10903140,11311135,11389679,11406111,11435306,11507094,11557028,11564694,11696247,11742812,11749697,11840567,12117417,12181350,12225859,12235164,12270127,12477932,12493773,12531285,12716892,12740424,12754519,12925876,1358795,14527684,14603368,14702039,15146197,15178563,15274339,15458438,15485886,15489334,15556631,15625115,15713750,15769744,15980244,16335952,1634…	12925876,7561057,8922468,9403839,
81539	SLC38A1,	solute carrier family 38, member 1					GO:0005275~amine transmembrane transporter activity,GO:0005283~sodium:amino acid symporter activity,GO:0005343~organic acid:sodium symporter activity,GO:0005416~cation:amino acid symporter activity,GO:0015171~amino acid transmembrane transporter activity,GO:0015175~neutral amino acid transmembrane transporter activity,GO:0015179~L-amino acid transmembrane transporter activity,GO:0015186~L-glutami…		10891391,11325958,12388062,12477932,14702039,15054072,15489334,16148032,16303743,16344560,16583402,17081983,17549407,18669648,18691976,18703994,8125298,9373149,
54407	slc38a2,	solute carrier family 38, member 2					GO:0005275~amine transmembrane transporter activity,GO:0015171~amino acid transmembrane transporter activity,GO:0015293~symporter activity,GO:0031402~sodium ion binding,GO:0031420~alkali metal ion binding,GO:0043167~ion binding,GO:0043169~cation binding,GO:0046872~metal ion binding,		10718198,10747860,10930503,12054432,12168954,12477932,14623874,14702039,15489334,15561425,15581851,15922329,15951569,16125834,16169070,16344560,16445384,16616430,16621798,16621896,17081983,17237199,18083107,18669648,18697751,18703994,
55089	Slc38a4,	solute carrier family 38, member 4					GO:0005275~amine transmembrane transporter activity,GO:0015171~amino acid transmembrane transporter activity,GO:0015293~symporter activity,GO:0031402~sodium ion binding,GO:0031420~alkali metal ion binding,GO:0043167~ion binding,GO:0043169~cation binding,GO:0046872~metal ion binding,		11342143,11414754,12477932,12845534,14702039,15489334,16148032,16344560,18703994,19015196,
8501	SLC43A1,	solute carrier family 43, member 1					GO:0005275~amine transmembrane transporter activity,GO:0015171~amino acid transmembrane transporter activity,GO:0015175~neutral amino acid transmembrane transporter activity,GO:0015179~L-amino acid transmembrane transporter activity,		11956097,12477932,12930836,14702039,15489334,9255310,972295,9722952,
124935	Slc43a2,	solute carrier family 43, member 2					GO:0005275~amine transmembrane transporter activity,GO:0015171~amino acid transmembrane transporter activity,GO:0015179~L-amino acid transmembrane transporter activity,		12477932,14702039,15489334,15498874,15659399,16303743,18669648,
11254	Slc6a14,	solute carrier family 6 (amino acid transporter), member 14		obesity,		Obesity, susceptibility to,Obesity, susceptibility to, BMIQ11,Obesity, susceptibility to, X-linked,	GO:0005275~amine transmembrane transporter activity,GO:0005326~neurotransmitter transporter activity,GO:0005328~neurotransmitter:sodium symporter activity,GO:0015171~amino acid transmembrane transporter activity,GO:0015293~symporter activity,GO:0015294~solute:cation symporter activity,GO:0015370~solute:sodium symporter activity,		10446133,10999806,12388375,12477932,14660737,14660752,15331564,15489334,15772651,15905073,18029348,18599538,18700007,19058789,
6541	SLC7A1,	solute carrier family 7 (cationic amino acid transporter, y+ system), member 1		endothelial dysfunction hypertension,			GO:0005275~amine transmembrane transporter activity,GO:0015171~amino acid transmembrane transporter activity,GO:0015174~basic amino acid transmembrane transporter activity,GO:0015179~L-amino acid transmembrane transporter activity,GO:0015181~arginine transmembrane transporter activity,		10485994,11665818,11891586,12202949,12388095,12477932,12787129,1348489,14702039,15057823,15064952,15086470,15342556,15489334,15491978,15631944,16344560,1718082,17325243,17494634,18172665,18574322,19067360,
6542	SLC7A2,	solute carrier family 7 (cationic amino acid transporter, y+ system), member 2					GO:0005275~amine transmembrane transporter activity,GO:0015171~amino acid transmembrane transporter activity,GO:0015174~basic amino acid transmembrane transporter activity,		11665818,12477932,12787129,15064952,15489334,16344560,16421571,17974005,18029348,18172665,18669648,8954799,9174363,
84889	SLC7A3,	solute carrier family 7 (cationic amino acid transporter, y+ system), member 3					GO:0000064~L-ornithine transmembrane transporter activity,GO:0005275~amine transmembrane transporter activity,GO:0015171~amino acid transmembrane transporter activity,GO:0015174~basic amino acid transmembrane transporter activity,GO:0015179~L-amino acid transmembrane transporter activity,GO:0015181~arginine transmembrane transporter activity,GO:0015189~L-lysine transmembrane transporter activity,…		10446328,11591158,12477932,14702039,15489334,15737334,16303743,16332251,18029348,9079705,9334265,
8140	SLC7A5,	solute carrier family 7 (cationic amino acid transporter, y+ system), member 5		melphalan pharmacokinetics melphalan side effects,	env:Envelope surface glycoprotein gp160, precursor,		GO:0003823~antigen binding,GO:0005275~amine transmembrane transporter activity,GO:0015171~amino acid transmembrane transporter activity,GO:0015175~neutral amino acid transmembrane transporter activity,GO:0015179~L-amino acid transmembrane transporter activity,GO:0042277~peptide binding,GO:0042605~peptide antigen binding,		10049700,10072483,10391915,10568788,10574970,10629848,11095508,11311135,11389679,11535130,11557028,11564694,11742812,12009310,12117417,12225859,12477932,12824232,12925876,15178563,15200428,15302935,15489334,15589117,15769744,15900591,1597461,16027961,16097034,16175382,16496379,17558306,17622555,18253116,18262359,18294274,18382329,18440724,18781797,18813831,19018776,19121087,19184136,19347882,7561…	12925876,7561057,8922468,9403839,
9057	SLC7A6,	solute carrier family 7 (cationic amino acid transporter, y+ system), member 6					GO:0005275~amine transmembrane transporter activity,GO:0015171~amino acid transmembrane transporter activity,GO:0015297~antiporter activity,		10903140,11078698,11311135,11742806,12477932,14603368,15280038,15342556,15489334,15756301,16785209,17197568,17329401,17974005,9039502,9829974,9878049,
56301	SLC7A10,	solute carrier family 7, (neutral amino acid transporter, y+ system) member 10					GO:0005275~amine transmembrane transporter activity,GO:0015171~amino acid transmembrane transporter activity,GO:0015175~neutral amino acid transmembrane transporter activity,GO:0015179~L-amino acid transmembrane transporter activity,GO:0015194~L-serine transmembrane transporter activity,GO:0022889~serine transmembrane transporter activity,		10734121,10863037,11441184,11509015,12477932,14702039,15458438,15489334,
56848	SPHK2,	sphingosine kinase 2	2.7.1.91,				GO:0000166~nucleotide binding,GO:0001727~lipid kinase activity,GO:0001882~nucleoside binding,GO:0001883~purine nucleoside binding,GO:0004143~diacylglycerol kinase activity,GO:0005524~ATP binding,GO:0008481~sphinganine kinase activity,GO:0017016~Ras GTPase binding,GO:0017050~D-erythro-sphingosine kinase activity,GO:0017076~purine nucleotide binding,GO:0019899~enzyme binding,GO:0030554~adenyl nucle…	hsa00600:Sphingolipid metabolism,hsa04020:Calcium signaling pathway,hsa04370:VEGF signaling pathway,hsa04666:Fc gamma R-mediated phagocytosis,	10751414,11230166,11777919,12391145,12477932,14596938,14702039,15489334,15951439,16103110,17311928,17635916,17895250,18178871,18263879,18691976,19168031,19240026,8786133,
8803	SUCLA2,	succinate-CoA ligase, ADP-forming, beta subunit	6.2.1.5,			Mitochondrial DNA depletion syndrome,Mitochondrial DNA depletion syndrome, enceophalomyopathic form,Mitochondrial DNA depletion syndrome, enceophalomyopathic form, with methylmalonic aciduria,	GO:0000166~nucleotide binding,GO:0001882~nucleoside binding,GO:0001883~purine nucleoside binding,GO:0004774~succinate-CoA ligase activity,GO:0004775~succinate-CoA ligase (ADP-forming) activity,GO:0005524~ATP binding,GO:0016405~CoA-ligase activity,GO:0016877~ligase activity, forming carbon-sulfur bonds,GO:0016878~acid-thiol ligase activity,GO:0017076~purine nucleotide binding,GO:0030554~adenyl nuc…	hsa00020:Citrate cycle (TCA cycle),hsa00640:Propanoate metabolism,	10508479,10727444,12477932,14643893,14702039,15057823,15489334,15592455,15877282,17287286,17301081,8125298,9373149,9765291,
8802	suclg1,	succinate-CoA ligase, alpha subunit	6.2.1.4,			Lactic acidosis, fatal infantile,	GO:0000166~nucleotide binding,GO:0001882~nucleoside binding,GO:0001883~purine nucleoside binding,GO:0003878~ATP citrate synthase activity,GO:0004774~succinate-CoA ligase activity,GO:0004775~succinate-CoA ligase (ADP-forming) activity,GO:0004776~succinate-CoA ligase (GDP-forming) activity,GO:0005525~GTP binding,GO:0016405~CoA-ligase activity,GO:0016877~ligase activity, forming carbon-sulfur bonds,…	hsa00020:Citrate cycle (TCA cycle),hsa00640:Propanoate metabolism,	10873456,12477932,15234968,15342556,15489334,15815621,16730941,17668387,8125298,9128182,9373149,
6821	SUOX,	sulfite oxidase	1.8.3.1,	leukemia,		A novel susceptibility locus for type 1 diabetes on Chr12q13 identified by a genome-wide association study,Sulfite oxidase deficiency,	GO:0005506~iron ion binding,GO:0008482~sulfite oxidase activity,GO:0009055~electron carrier activity,GO:0016667~oxidoreductase activity, acting on sulfur group of donors,GO:0016670~oxidoreductase activity, acting on sulfur group of donors, oxygen as acceptor,GO:0020037~heme binding,GO:0030151~molybdenum ion binding,GO:0043167~ion binding,GO:0043169~cation binding,GO:0043546~molybdopterin cofactor…	hsa00920:Sulfur metabolism,	10519592,12112661,12368985,12424234,12477932,12763039,12832761,14567685,14729666,15489334,16140720,16229463,16344560,16475804,17366837,17940249,18177044,18198356,18529001,18959753,7599189,9428520,9600976,
7296	LOC100130902,TXNRD1,	thioredoxin reductase 1; hypothetical LOC100130902	1.8.1.9,	breast cancer,			GO:0000166~nucleotide binding,GO:0001882~nucleoside binding,GO:0001883~purine nucleoside binding,GO:0004791~thioredoxin-disulfide reductase activity,GO:0008430~selenium binding,GO:0009055~electron carrier activity,GO:0015035~protein disulfide oxidoreductase activity,GO:0015036~disulfide oxidoreductase activity,GO:0016209~antioxidant activity,GO:0016651~oxidoreductase activity, acting on NADH or N…	hsa00240:Pyrimidine metabolism,	10383413,10432307,10786696,11375392,11410332,11737861,11782468,11953436,12214272,12435734,12477932,12574159,12668662,12949356,12968334,13679440,14607844,14676218,14980707,15123685,15183196,15199063,15379556,15489334,15592455,15824742,15879598,16424062,16481328,16750198,16868544,16977661,17382897,17512005,17601350,17634480,18042542,18083107,18163424,18187038,18267104,18382651,18483336,18835810,189…
7083	tk1,	thymidine kinase 1, soluble	2.7.1.21,				GO:0000166~nucleotide binding,GO:0001882~nucleoside binding,GO:0001883~purine nucleoside binding,GO:0004797~thymidine kinase activity,GO:0005524~ATP binding,GO:0017076~purine nucleotide binding,GO:0019136~deoxynucleoside kinase activity,GO:0019205~nucleobase, nucleoside, nucleotide kinase activity,GO:0019206~nucleoside kinase activity,GO:0030554~adenyl nucleotide binding,GO:0032553~ribonucleotide…	hsa00240:Pyrimidine metabolism,hsa00983:Drug metabolism,	10924519,11389691,11474248,11992400,12449723,12477932,12699056,1370831,14659972,14697231,14701726,14702039,14719072,15153115,15353126,15489334,15611477,15733844,15809747,15978330,16169070,16964243,16969512,17065087,17227951,17407781,1848304,18615770,18669648,18691976,19087190,19123476,2026611,2263164,2538159,3128713,3301530,3335503,3785218,6549046,8786092,9575153,
7084	tk2,	thymidine kinase 2, mitochondrial	2.7.1.21,	Mitochondrial myopathy,		Mitochondrial DNA depletion myopathy,Mitochondrial DNA depletion syndrome, myopathic form,	GO:0000166~nucleotide binding,GO:0001882~nucleoside binding,GO:0001883~purine nucleoside binding,GO:0004797~thymidine kinase activity,GO:0005524~ATP binding,GO:0017076~purine nucleotide binding,GO:0019136~deoxynucleoside kinase activity,GO:0019205~nucleobase, nucleoside, nucleotide kinase activity,GO:0019206~nucleoside kinase activity,GO:0030554~adenyl nucleotide binding,GO:0032553~ribonucleotide…	hsa00240:Pyrimidine metabolism,hsa00983:Drug metabolism,	11687801,12391347,12477932,12493767,12682338,12687391,12873860,14659972,15639197,15907288,1597187,16344560,16969512,17065084,17468435,17913703,18021809,18265975,18446447,18508266,19154348,19265691,605384,9079672,9598140,9989599,
113452	tmem54,	transmembrane protein 54							11394883,12477932,15489334,9500206,

## Sheet: HIV_INTERACTION
ID	OFFICIAL_GENE_SYMBOL	HIV_INTERACTION
2821	GPI,	env:Envelope surface glycoprotein gp120,
1374	Cpt1a,	env:Envelope surface glycoprotein gp160, precursor,
1375	CHKB,Cpt1b,	env:Envelope surface glycoprotein gp160, precursor,
6520	SLC3A2,	env:Envelope surface glycoprotein gp160, precursor,
8140	SLC7A5,	env:Envelope surface glycoprotein gp160, precursor,
126129	Cpt1c,	env:Envelope surface glycoprotein gp160, precursor,
2203	Fbp1,	gag:matrix,
8789	FBP2,	gag:matrix,
5105	PCK1,	pol:integrase,
57379	AICDA,	vif:Vif,
291	SLC25A4,	vpr:Vpr,
