# Supplementary material for: Genome-wide metabolic model to improve understanding of CD4+ T cell metabolism, immunometabolism and application in drug design
Source: Royal Society of Chemistry journal article supplement (doi:10.1039/c5mb00480b), 2015-11-18
Supplement: c5mb00480b1.zip [file supplementary_Table_3-glutamine_metabolism.xlsx]

## Sheet: Top 10 prctile rxn markers_gln
reactions	subsystem	formula	weights
G5SADrm	Arginine and Proline Metabolism	glu5sa[m] -> h[m] + h2o[m] + 1pyr5c[m]	-1319.75
RTOTAL2FATPc	Carnitine shuttle	atp[c] + coa[c] + Rtotal2[e] -> amp[c] + ppi[c] + Rtotal2coa[c]	-1599.21
RTOTAL3FATPc	Carnitine shuttle	atp[c] + coa[c] + Rtotal3[e] -> amp[c] + ppi[c] + Rtotal3coa[c]	-1585.43
DCSPTN1COAtxc	Exchange	h2o[c] + atp[c] + dcsptn1coa[c] -> adp[c] + h[c] + pi[c] + dcsptn1coa[x]	2773.13
EX_acac(e)	Exchange/demand reaction	acac[e] <=>	-1798.75
EX_dcsptn1(e)	Exchange/demand reaction	dcsptn1[e] <=>	2948.13
EX_lnlc(e)	Exchange/demand reaction	lnlc[e] <=>	2097.16
EX_lnlncg(e)	Exchange/demand reaction	lnlncg[e] <=>	1635.11
EX_retfa(e)	Exchange/demand reaction	retfa[e] <=>	1308.51
r0311	Fatty acid oxidation	atp[r] + coa[r] + hdca[r] -> amp[r] + h[r] + ppi[r] + pmtcoa[r]	1449.67
r1260	Fatty acid oxidation	atp[r] + coa[r] + lnlncg[r] -> amp[r] + h[r] + ppi[r] + lnlncgcoa[r]	1361.62
FAOXC2251836m	Fatty acid oxidation	2 h2o[m] + 2 coa[m] + 2 nad[m] + dcsptn1coa[m] -> 2 h[m] + 2 nadh[m] + 2 accoa[m] + lnlncgcoa[m]	-2303.36
ARACHCPT1	Fatty acid oxidation	crn[c] + arachcoa[c] -> coa[c] + arachcrn[c]	-1420.7
C180CPT2	Fatty acid oxidation	coa[m] + stcrn[m] -> crn[m] + stcoa[m]	-2020.02
FACOAL203	Fatty acid oxidation	atp[c] + coa[c] + dlnlcg[c] -> amp[c] + ppi[c] + dlnlcgcoa[c]	-1535.13
RTOTALCRNCPT1	Fatty acid oxidation	crn[c] + Rtotalcoa[c] -> coa[c] + Rtotalcrn[c]	-1468.57
RE3003M	Fatty acid oxidation	CE5120[m] <=> CE5119[m]	1483.27
DESAT18_3	Fatty acid synthesis	o2[c] + h[c] + nadh[c] + stcoa[c] -> 2 h2o[c] + nad[c] + odecoa[c]	-1795.48
DESAT18_4	Fatty acid synthesis	o2[c] + h[c] + nadh[c] + stcoa[c] -> 2 h2o[c] + nad[c] + vacccoa[c]	-1416.9
DESAT18_5	Fatty acid synthesis	o2[c] + h[c] + nadh[c] + stcoa[c] -> 2 h2o[c] + nad[c] + od2coa[c]	-1790.14
FAS180COA	Fatty acid synthesis	3 h[c] + 2 nadph[c] + malcoa[c] + pmtcoa[c] -> h2o[c] + 2 nadp[c] + co2[c] + coa[c] + stcoa[c]	1695.61
RE0583C	Fatty acid synthesis	h[c] + nadph[c] + od2coa[c] <=> nadp[c] + stcoa[c]	1528.23
GTHPm	Glutathione metabolism	h2o2[m] + 2 gthrd[m] -> 2 h2o[m] + gthox[m]	-1482.29
G6PPer	Glycolysis/gluconeogenesis	h2o[r] + g6p[r] -> glc_D[r] + pi[r]	1788.61
ADPT	Nucleotide salvage pathway	ade[c] + prpp[c] -> amp[c] + ppi[c]	-1487.29
ARTFR13	R Group Synthesis	tdcoa[c] -> 0.875 R1coa_hs[c]	1322.44
ARTFR203	R Group Synthesis	h[m] + nadph[m] + 2 fadh2[m] + lnlncgcoa[c] -> nadp[m] + 2 fad[m] + 1.125 R2coa_hs[c]	1930.73
ARTFR205	R Group Synthesis	h[m] + nadph[m] + 2 fadh2[m] + dlnlcgcoa[c] -> nadp[m] + 2 fad[m] + 1.25 R2coa_hs[c]	1550.25
ARTFR210	R Group Synthesis	h[m] + nadph[m] + fadh2[m] + lnlccoa[c] -> nadp[m] + fad[m] + 1.125 R2coa_hs[c]	2300.42
ARTFR212	R Group Synthesis	2 h[m] + 2 nadph[m] + 3 fadh2[m] + dcsptn1coa[c] -> 2 nadp[m] + 3 fad[m] + 1.375 R2coa_hs[c]	3076.05
ARTFR32	R Group Synthesis	fadh2[m] + odecoa[c] -> fad[m] + 1.125 R3coa_hs[c]	1358.36
ARTCOAL2	R group synthesis	h2o[c] + Rtotal2coa[c] -> h[c] + coa[c] + Rtotal2[c]	1387.61
r0787	Sphingolipid metabolism	h2o[c] + sph1p[c] -> pi[c] + sphgn[c]	-2025.97
SLCBK1	Sphingolipid metabolism	atp[c] + 2 h[c] + sphgn[c] -> adp[c] + sph1p[c]	1826.42
DHPR	Tetrahydrobiopterin metabolism	h[c] + nadh[c] + dhbpt[c] -> nad[c] + thbpt[c]	-1990.63
DHPR2	Tetrahydrobiopterin metabolism	5mthf[c] + dhbpt[c] -> h[c] + thbpt[c] + mlthf[c]	4796.4
THBPT4ACAMDASE	Tetrahydrobiopterin metabolism	thbpt4acam[c] -> h2o[c] + dhbpt[c]	2079.57
PIter	Transport, endoplasmic reticular	pi[r] <=> pi[c]	-1334.91
PPItr	Transport, endoplasmic reticular	ppi[c] <=> ppi[r]	2148.01
r2511	Transport, endoplasmic reticular	crn[r] + lnlc[c] <=> crn[c] + lnlc[r]	1371.22
ACt2r	Transport, extracellular	h[e] + ac[e] <=> h[c] + ac[c]	1458
L_LACt2r	Transport, extracellular	h[e] + lac_L[e] <=> h[c] + lac_L[c]	1561.28
PYRt2r	Transport, extracellular	h[e] + pyr[e] <=> h[c] + pyr[c]	1586.91
r0986	Transport, lysosomal	lnlc[l] -> lnlc[r]	1446.59
ACALDtm	Transport, mitochondrial	acald[m] <=> acald[c]	1668.77
ACt2m	Transport, mitochondrial	h[c] + ac[c] <=> h[m] + ac[m]	-1464.15
O2tm	Transport, mitochondrial	o2[c] <=> o2[m]	1330.29
r2387	Transport, mitochondrial	h[c] + icit[c] + mal_L[m] -> h[m] + icit[m] + mal_L[c]	1360.04
DCSPTN1COAtx	Transport, peroxisomal	dcsptn1coa[c] <=> dcsptn1coa[x]	2784.72
R_group_phosphotase_2	Unassigned	atp[c] + coa[c] + Rtotal2[c] -> amp[c] + ppi[c] + Rtotal2coa[c]	-1599.21
r0603	Valine, leucine, and isoleucine metabolism	2mbcoa[m] + q10[m] -> 2mb2coa[m] + q10h2[m]	-1564.05
MMSAD1m	Valine, leucine, and isoleucine metabolism	coa[m] + nad[m] + 2mop[m] -> co2[m] + nadh[m] + ppcoa[m]	-1594.58
P5CR	Arginine and Proline Metabolism	2 h[c] + nadph[c] + 1pyr5c[c] -> nadp[c] + pro_L[c]	-972.936
P5CRxm	Arginine and Proline Metabolism	2 h[m] + nadh[m] + 1pyr5c[m] -> nad[m] + pro_L[m]	853.955
ICDHyrm	Citric acid cycle	nadp[m] + icit[m] <=> nadph[m] + akg[m] + co2[m]	867.783
MDH	Citric acid cycle	nad[c] + mal_L[c] <=> h[c] + nadh[c] + oaa[c]	-846.081
ICDHy	Citric acid cycle	nadp[c] + icit[c] -> nadph[c] + akg[c] + co2[c]	948.947
PPCDC	CoA synthesis	h[c] + 4ppcys[c] -> co2[c] + pan4p[c]	1213.04
r0060	Cysteine Metabolism	ser_L[c] -> nh4[c] + pyr[c]	1041.24
FAOXC160	Fatty acid oxidation	7 h2o[m] + 7 coa[m] + 7 nad[m] + 7 fad[m] + pmtcoa[m] -> 7 h[m] + 7 nadh[m] + 8 accoa[m] + 7 fadh2[m]	919.043
r1488	Fatty acid oxidation	atp[c] + coa[c] + hdcea[c] -> amp[c] + ppi[c] + HC10852[c]	-802.313
C204CPT1	Fatty acid oxidation	crn[c] + arachdcoa[c] -> coa[c] + arachdcrn[c]	987.637
RE1518M	Fatty acid oxidation	fad[m] + CE0785[m] <=> fadh2[m] + CE2432[m]	1278.92
RE1519M	Fatty acid oxidation	fad[m] + CE2431[m] <=> fadh2[m] + CE2435[m]	1279.75
DESAT16_2	Fatty acid synthesis	o2[c] + h[c] + nadh[c] + pmtcoa[c] -> 2 h2o[c] + nad[c] + hdcoa[c]	707.46
DESAT18_6	Fatty acid synthesis	o2[c] + h[c] + nadh[c] + odecoa[c] -> 2 h2o[c] + nad[c] + lneldccoa[c]	931.655
DESAT18_8	Fatty acid synthesis	o2[c] + h[c] + nadh[c] + od2coa[c] -> 2 h2o[c] + nad[c] + lneldccoa[c]	926.926
MTHFD2m	Folate metabolism	nad[m] + mlthf[m] <=> nadh[m] + methf[m]	-867.772
GLUDxm	Glutamate metabolism	h2o[m] + nad[m] + glu_L[m] <=> h[m] + akg[m] + nadh[m] + nh4[m]	-867.815
r0022	Glutathione metabolism	nad[m] + 2 gthrd[m] <=> h[m] + nadh[m] + gthox[m]	-867.784
CEPTC	Glycerophospholipid metabolism	cdpchol[c] + dag_hs[c] -> h[c] + cmp[c] + pchol_hs[c]	-795.838
PSSA1_hs	Glycerophospholipid metabolism	ser_L[c] + pchol_hs[c] <=> chol[c] + ps_hs[c]	796.201
RE3301C	Glycerophospholipid metabolism	h2o[c] + ps_hs[c] <=> h[c] + pa_hs[c] + ser_L[c]	-796.209
GHMT2r	Glycine, serine, alanine and threonine metabolism	thf[c] + ser_L[c] <=> h2o[c] + gly[c] + mlthf[c]	734.796
r0210	Methionine and cysteine metabolism	h[c] + ser_L[c] + HC00250[c] -> h2o[c] + cys_L[c]	1039.35
NICRNS	NAD metabolism	atp[c] + 2 h[c] + nicrns[c] -> adp[c] + nicrnt[c]	799.819
NMNS	NAD metabolism	h[c] + prpp[c] + ncam[c] -> ppi[c] + nmn[c]	-799.506
NT5C	NAD metabolism	h2o[c] + nicrnt[c] -> pi[c] + nicrns[c]	-999.127
ATPH1e	Nucleotide interconversion	2 h2o[e] + atp[e] -> 3 h[e] + amp[e] + 2 pi[e]	-1011.43
GMPR	Nucleotide interconversion	2 h[c] + nadph[c] + gmp[c] -> nh4[c] + nadp[c] + imp[c]	-914.919
GMPS2	Nucleotide interconversion	h2o[c] + atp[c] + gln_L[c] + xmp[c] -> 2 h[c] + glu_L[c] + amp[c] + ppi[c] + gmp[c]	891.608
r0395	Nucleotide interconversion	h2o[c] + o2[c] + hxan[c] -> h2o2[c] + xan[c]	825.971
ADK3m	Nucleotide interconversion	amp[m] + gtp[m] <=> adp[m] + gdp[m]	704.532
CYTK8	Nucleotide interconversion	datp[c] + cmp[c] <=> dadp[c] + cdp[c]	977.153
ATPS4m	Oxidative phosphorylation	5 h[c] + adp[m] + pi[m] -> 3 h[m] + h2o[m] + atp[m]	1131.33
PPM	Pentose phosphate pathway	r1p[c] <=> r5p[c]	788.789
PUNP3	Purine catabolism	pi[c] + gsn[c] <=> gua[c] + r1p[c]	-999.318
PUNP5	Purine catabolism	pi[c] + ins[c] <=> hxan[c] + r1p[c]	-799.979
PUNP6	Purine catabolism	pi[c] + din[c] <=> 2dr1p[c] + hxan[c]	-1252.55
LCADi	Pyruvate metabolism	h2o[c] + nad[c] + lald_L[c] -> 2 h[c] + nadh[c] + lac_L[c]	1235.09
ME1m	Pyruvate metabolism	nad[m] + mal_L[m] -> co2[m] + nadh[m] + pyr[m]	-868.218
ARTCOAL1	R group synthesis	h2o[c] + Rtotalcoa[c] -> h[c] + coa[c] + Rtotal[c]	-909.455
DHCRD1	Sphingolipid metabolism	nadp[c] + dhcrm_hs[c] -> h[c] + nadph[c] + crm_hs[c]	968.99
RE2675C	Sphingolipid metabolism	o2[c] + h[c] + nadh[c] + dhcrm_hs[c] -> 2 h2o[c] + nad[c] + crm_hs[c]	702.015
R_group_phosphotase_1	Unassigned	atp[c] + coa[c] + Rtotal[c] -> amp[c] + ppi[c] + Rtotalcoa[c]	696.557
R_group_phosphotase_3	Unassigned	atp[c] + coa[c] + Rtotal3[c] -> amp[c] + ppi[c] + Rtotal3coa[c]	-790.441
MMEm	Valine, leucine, and isoleucine metabolism	mmcoa_R[m] <=> mmcoa_S[m]	-1083.04
RE3347C	Vitamin B2 metabolism	h[c] + nadh[c] + fad[c] <=> nad[c] + fadh2[c]	-1058.16
CytOxe-	Exchange	focytC[m] -> ficytC[m] + e-[m]	-815.772
FAOXC16C14m	Exchange	h2o[m] + coa[m] + nad[m] + fad[m] + pmtcoa[m] -> h[m] + nadh[m] + accoa[m] + fadh2[m] + tdcoa[m]	913.682
STCOATxc	Exchange	h2o[c] + atp[c] + stcoa[c] -> adp[c] + h[c] + pi[c] + stcoa[x]	-865.855
ALAATB0tc	Exchange	2 na1[e] + ala_L[e] + cl[e] -> 2 na1[c] + ala_L[c] + cl[c]	-1078.95
ASNATB0tc	Exchange	2 na1[e] + asn_L[e] + cl[e] -> 2 na1[c] + asn_L[c] + cl[c]	-1079.03
CHOLESTTDe	Exchange	chsterol[c] -> chsterol[e]	965.6
CYSSNAT5tc	Exchange	h[c] + na1[e] + cys_L[e] <=> h[e] + na1[c] + cys_L[c]	-1517.3
FOLTle	Exchange	h[e] + fol[e] -> h[c] + fol[c]	850.618
HISSNAT5tc	Exchange	h[c] + na1[e] + his_L[e] <=> h[e] + na1[c] + his_L[c]	-883.096
HISyLATthc	Exchange	h[e] + arg_L[c] + his_L[e] -> h[c] + arg_L[e] + his_L[c]	883.037
LEUATB0tc	Exchange	2 na1[e] + cl[e] + leu_L[e] -> 2 na1[c] + cl[c] + leu_L[c]	-1005.13
METATB0tc	Exchange	2 na1[e] + cl[e] + met_L[e] -> 2 na1[c] + met_L[c] + cl[c]	-1076.92
NACHORCTL3le	Exchange	h[e] + nac[e] -> h[c] + nac[c]	883.013
OAADC	Exchange	h[c] + oaa[c] -> pyr[c] + co2[c]	929.197
ORNALArBATtc	Exchange	ala_L[c] + orn[e] -> orn[c] + ala_L[e]	1980.17
ORNLEUrBATtc	Exchange	orn[e] + leu_L[c] -> orn[c] + leu_L[e]	1906.22
PROIMINOtc	Exchange	2 na1[e] + cl[e] + pro_L[e] -> 2 na1[c] + cl[c] + pro_L[c]	901.109
SERATB0tc	Exchange	2 na1[e] + ser_L[e] + cl[e] -> 2 na1[c] + ser_L[c] + cl[c]	-1078.93
THRATB0tc	Exchange	2 na1[e] + thr_L[e] + cl[e] -> 2 na1[c] + thr_L[c] + cl[c]	903.304
THRPHELAT2tc	Exchange	thr_L[e] + phe_L[c] -> thr_L[c] + phe_L[e]	1558.33
TRPATB0tc	Exchange	2 na1[e] + cl[e] + trp_L[e] -> 2 na1[c] + cl[c] + trp_L[c]	901.161
TYRATB0tc	Exchange	2 na1[e] + cl[e] + tyr_L[e] -> 2 na1[c] + cl[c] + tyr_L[c]	-1002.92
VALATB0tc	Exchange	2 na1[e] + cl[e] + val_L[e] -> 2 na1[c] + cl[c] + val_L[c]	-1076.81
TTDCAFATPc	Exchange	atp[c] + coa[c] + ttdca[e] -> amp[c] + ppi[c] + tdcoa[c]	-975.106
ARTFR206	Exchange	2 h[m] + 2 nadph[m] + 2 fadh2[m] + arachdcoa[c] -> 2 nadp[m] + 2 fad[m] + 1.25 R2coa_hs[c]	1062.55
ARTFR33	Exchange	fadh2[m] + vacccoa[c] -> fad[m] + 1.125 R3coa_hs[c]	976.908
ARTFR42	Exchange	fadh2[m] + odecoa[c] -> fad[m] + 1.125 R4coa_hs[c]	837.217
ARTFR46	Exchange	fadh2[m] + od2coa[c] -> fad[m] + 1.125 R4coa_hs[c]	830.64
MOGAT	Exchange	Rtotalcoa[c] + mag_hs[c] -> coa[c] + dag_hs[c]	-909.403
ARTFR11	Exchange	pmtcoa[c] -> R1coa_hs[c]	1139.39
PRO1x	Exchange	nad[c] + pro_L[c] -> 2 h[c] + nadh[c] + 1pyr5c[c]	1058.17
EX_cgly(e)	Exchange/demand reaction	cgly[e] <=>	985.194
EX_cys_L(e)	Exchange/demand reaction	cys_L[e] <=	1570.21
EX_glu_L(e)	Exchange/demand reaction	glu_L[e] <=>	-925.956
EX_h(e)	Exchange/demand reaction	h[e] <=>	820.572
EX_hdca(e)	Exchange/demand reaction	hdca[e] <=>	852.723
EX_ins(e)	Exchange/demand reaction	ins[e] <=	835.867
EX_lneldc(e)	Exchange/demand reaction	lneldc[e] <=>	-872.421
EX_met_L(e)	Exchange/demand reaction	met_L[e] <=>	-2304.4
EX_ncam(e)	Exchange/demand reaction	ncam[e] <=>	-704.534
EX_ocdca(e)	Exchange/demand reaction	ocdca[e] <=	-696.287
EX_retinol(e)	Exchange/demand reaction	retinol[e] <=>	929.25
EX_Rtotal3(e)	Exchange/demand reaction	Rtotal3[e] <=>	-748.202
EX_vitd3(e)	Exchange/demand reaction	vitd3[e] <=	730.942
AHCYStr	Transport, endoplasmic reticular	ahcys[c] <=> ahcys[r]	831.479
Htr	Transport, endoplasmic reticular	h[c] <=> h[r]	-711.184
NADPtru	Transport, endoplasmic reticular	nadp[r] -> nadp[c]	1052.65
ADNt	Transport, extracellular	adn[e] <=> adn[c]	-831.491
ALAt4	Transport, extracellular	na1[e] + ala_L[e] -> na1[c] + ala_L[c]	-1060.59
ALAtN1	Transport, extracellular	h[c] + 2 na1[e] + ala_L[e] <=> h[e] + 2 na1[c] + ala_L[c]	-1945.86
ARACHDt2	Transport, extracellular	arachd[e] <=> arachd[c]	-1017.08
ASNt4	Transport, extracellular	na1[e] + asn_L[e] -> na1[c] + asn_L[c]	-1060.58
ASNtN1	Transport, extracellular	h[c] + 2 na1[e] + asn_L[e] <=> h[e] + 2 na1[c] + asn_L[c]	-1945.83
DADNt4	Transport, extracellular	dad_2[e] <=> dad_2[c]	-835.139
GLNtN1	Transport, extracellular	h[c] + 2 na1[e] + gln_L[e] <=> h[e] + 2 na1[c] + gln_L[c]	-1253.54
GLYt4	Transport, extracellular	na1[e] + gly[e] -> na1[c] + gly[c]	921.755
HOMt4	Transport, extracellular	na1[e] + hom_L[e] -> na1[c] + hom_L[c]	921.761
HYXNt	Transport, extracellular	hxan[e] <=> hxan[c]	-1207.15
LEUt4	Transport, extracellular	na1[e] + leu_L[e] -> na1[c] + leu_L[c]	-986.654
LEUtec	Transport, extracellular	leu_L[e] <=> leu_L[c]	-984.429
METt4	Transport, extracellular	na1[e] + met_L[e] -> na1[c] + met_L[c]	-1058.33
METtec	Transport, extracellular	met_L[e] <=> met_L[c]	-1056.09
NAt3_1	Transport, extracellular	h[e] + na1[c] <=> h[c] + na1[e]	885.257
ORNtiDF	Transport, extracellular	orn[e] -> orn[c]	921.791
PROt4	Transport, extracellular	na1[e] + pro_L[e] -> na1[c] + pro_L[c]	919.589
RIBt	Transport, extracellular	rib_D[e] <=> rib_D[c]	-883.02
RTOTAL3t	Transport, extracellular	Rtotal3[e] <=> Rtotal3[c]	-794.692
RTOTALt	Transport, extracellular	Rtotal[e] <=> Rtotal[c]	-859.463
SERt4	Transport, extracellular	na1[e] + ser_L[e] -> na1[c] + ser_L[c]	-1060.59
SERtN1	Transport, extracellular	h[c] + 2 na1[e] + ser_L[e] <=> h[e] + 2 na1[c] + ser_L[c]	-1945.84
THRt4	Transport, extracellular	na1[e] + thr_L[e] -> na1[c] + thr_L[c]	921.83
VALtec	Transport, extracellular	val_L[e] <=> val_L[c]	-1056.15
r1050	Transport, extracellular	chsterol[e] <=> chsterol[c]	-965.609
r1639	Transport, extracellular	cys_L[e] + thr_L[c] <=> cys_L[c] + thr_L[e]	-1556.1
r1666	Transport, extracellular	lys_L[e] + citr_L[c] <=> lys_L[c] + citr_L[e]	-919.531
r1669	Transport, extracellular	arg_L[e] + citr_L[c] <=> arg_L[c] + citr_L[e]	-919.7
r1672	Transport, extracellular	na1[e] + ala_L[c] + gly[e] -> na1[c] + ala_L[e] + gly[c]	1980.14
r1673	Transport, extracellular	na1[e] + gln_L[c] + gly[e] -> na1[c] + gln_L[e] + gly[c]	1287.76
r1674	Transport, extracellular	na1[e] + gly[e] + ser_L[c] -> na1[c] + gly[c] + ser_L[e]	1980.18
r1675	Transport, extracellular	na1[e] + gly[e] + met_L[c] -> na1[c] + gly[c] + met_L[e]	1977.84
r1677	Transport, extracellular	na1[e] + gly[e] + phe_L[c] -> na1[c] + gly[c] + phe_L[e]	1556.04
r1678	Transport, extracellular	na1[e] + gly[e] + tyr_L[c] -> na1[c] + gly[c] + tyr_L[e]	1904.08
r1679	Transport, extracellular	na1[e] + cys_L[c] + gly[e] -> na1[c] + cys_L[e] + gly[c]	1553.79
r1680	Transport, extracellular	na1[e] + gly[e] + leu_L[c] -> na1[c] + gly[c] + leu_L[e]	1906.24
r1682	Transport, extracellular	na1[e] + asn_L[c] + gly[e] -> na1[c] + asn_L[e] + gly[c]	1980.15
r1683	Transport, extracellular	na1[e] + gly[e] + val_L[c] -> na1[c] + gly[c] + val_L[e]	1977.92
r1686	Transport, extracellular	na1[e] + gly[e] + ile_L[c] -> na1[c] + gly[c] + ile_L[e]	1553.76
r1687	Transport, extracellular	na1[e] + ala_L[e] + gly[c] -> na1[c] + ala_L[c] + gly[e]	-1984.62
r1691	Transport, extracellular	na1[e] + ala_L[e] + trp_L[c] -> na1[c] + ala_L[c] + trp_L[e]	-1982.37
r1696	Transport, extracellular	na1[e] + ala_L[e] + pro_L[c] -> na1[c] + ala_L[c] + pro_L[e]	-1982.41
r1700	Transport, extracellular	na1[e] + ala_L[e] + hom_L[c] -> na1[c] + ala_L[c] + hom_L[e]	-1984.65
r1702	Transport, extracellular	na1[e] + gln_L[e] + gly[c] -> na1[c] + gln_L[c] + gly[e]	-1292.27
r1706	Transport, extracellular	na1[e] + gln_L[e] + trp_L[c] -> na1[c] + gln_L[c] + trp_L[e]	-1290.06
r1711	Transport, extracellular	na1[e] + gln_L[e] + pro_L[c] -> na1[c] + gln_L[c] + pro_L[e]	-1290.09
r1715	Transport, extracellular	na1[e] + gln_L[e] + hom_L[c] -> na1[c] + gln_L[c] + hom_L[e]	-1292.24
r1717	Transport, extracellular	na1[e] + gly[c] + ser_L[e] -> na1[c] + gly[e] + ser_L[c]	-1984.59
r1721	Transport, extracellular	na1[e] + ser_L[e] + trp_L[c] -> na1[c] + ser_L[c] + trp_L[e]	-1982.42
r1726	Transport, extracellular	na1[e] + ser_L[e] + pro_L[c] -> na1[c] + ser_L[c] + pro_L[e]	-1982.37
r1730	Transport, extracellular	na1[e] + ser_L[e] + hom_L[c] -> na1[c] + ser_L[c] + hom_L[e]	-1984.6
r1732	Transport, extracellular	na1[e] + gly[c] + met_L[e] -> na1[c] + gly[e] + met_L[c]	-1982.33
r1736	Transport, extracellular	na1[e] + met_L[e] + trp_L[c] -> na1[c] + met_L[c] + trp_L[e]	-1980.06
r1741	Transport, extracellular	na1[e] + met_L[e] + pro_L[c] -> na1[c] + met_L[c] + pro_L[e]	-1980.01
r1744	Transport, extracellular	na1[e] + thr_L[c] + met_L[e] -> na1[c] + thr_L[e] + met_L[c]	-1982.36
r1745	Transport, extracellular	na1[e] + met_L[e] + hom_L[c] -> na1[c] + met_L[c] + hom_L[e]	-1982.27
r1748	Transport, extracellular	na1[e] + ala_L[c] + trp_L[e] -> na1[c] + ala_L[e] + trp_L[c]	1977.96
r1749	Transport, extracellular	na1[e] + gln_L[c] + trp_L[e] -> na1[c] + gln_L[e] + trp_L[c]	1285.62
r1750	Transport, extracellular	na1[e] + ser_L[c] + trp_L[e] -> na1[c] + ser_L[e] + trp_L[c]	1977.96
r1751	Transport, extracellular	na1[e] + met_L[c] + trp_L[e] -> na1[c] + met_L[e] + trp_L[c]	1975.66
r1752	Transport, extracellular	na1[e] + trp_L[e] + phe_L[c] -> na1[c] + phe_L[e] + trp_L[c]	1553.87
r1753	Transport, extracellular	na1[e] + trp_L[e] + tyr_L[c] -> na1[c] + tyr_L[e] + trp_L[c]	1901.87
r1754	Transport, extracellular	na1[e] + cys_L[c] + trp_L[e] -> na1[c] + cys_L[e] + trp_L[c]	1551.63
r1755	Transport, extracellular	na1[e] + trp_L[e] + leu_L[c] -> na1[c] + leu_L[e] + trp_L[c]	1903.99
r1757	Transport, extracellular	na1[e] + asn_L[c] + trp_L[e] -> na1[c] + asn_L[e] + trp_L[c]	1977.98
r1758	Transport, extracellular	na1[e] + trp_L[e] + val_L[c] -> na1[c] + val_L[e] + trp_L[c]	1975.76
r1761	Transport, extracellular	na1[e] + trp_L[e] + ile_L[c] -> na1[c] + ile_L[e] + trp_L[c]	1551.53
r1762	Transport, extracellular	na1[e] + gly[c] + phe_L[e] -> na1[c] + gly[e] + phe_L[c]	-1560.51
r1767	Transport, extracellular	na1[e] + phe_L[e] + trp_L[c] -> na1[c] + trp_L[e] + phe_L[c]	-1558.31
r1771	Transport, extracellular	na1[e] + phe_L[e] + pro_L[c] -> na1[c] + pro_L[e] + phe_L[c]	-1558.27
r1774	Transport, extracellular	na1[e] + thr_L[c] + phe_L[e] -> na1[c] + thr_L[e] + phe_L[c]	-1560.56
r1775	Transport, extracellular	na1[e] + phe_L[e] + hom_L[c] -> na1[c] + hom_L[e] + phe_L[c]	-1560.49
r1777	Transport, extracellular	na1[e] + gly[c] + tyr_L[e] -> na1[c] + gly[e] + tyr_L[c]	-1908.53
r1782	Transport, extracellular	na1[e] + tyr_L[e] + trp_L[c] -> na1[c] + trp_L[e] + tyr_L[c]	-1906.38
r1786	Transport, extracellular	na1[e] + tyr_L[e] + pro_L[c] -> na1[c] + pro_L[e] + tyr_L[c]	-1906.37
r1789	Transport, extracellular	na1[e] + thr_L[c] + tyr_L[e] -> na1[c] + thr_L[e] + tyr_L[c]	-1908.59
r1790	Transport, extracellular	na1[e] + tyr_L[e] + hom_L[c] -> na1[c] + hom_L[e] + tyr_L[c]	-1908.55
r1792	Transport, extracellular	na1[e] + cys_L[e] + gly[c] -> na1[c] + cys_L[c] + gly[e]	-1558.26
r1797	Transport, extracellular	na1[e] + cys_L[e] + trp_L[c] -> na1[c] + cys_L[c] + trp_L[e]	-1556.08
r1801	Transport, extracellular	na1[e] + cys_L[e] + pro_L[c] -> na1[c] + cys_L[c] + pro_L[e]	-1556.07
r1807	Transport, extracellular	na1[e] + gly[c] + leu_L[e] -> na1[c] + gly[e] + leu_L[c]	-1910.65
r1812	Transport, extracellular	na1[e] + leu_L[e] + trp_L[c] -> na1[c] + trp_L[e] + leu_L[c]	-1908.43
r1816	Transport, extracellular	na1[e] + leu_L[e] + pro_L[c] -> na1[c] + pro_L[e] + leu_L[c]	-1908.32
r1819	Transport, extracellular	na1[e] + thr_L[c] + leu_L[e] -> na1[c] + thr_L[e] + leu_L[c]	-1910.72
r1823	Transport, extracellular	na1[e] + ala_L[c] + pro_L[e] -> na1[c] + ala_L[e] + pro_L[c]	1977.94
r1824	Transport, extracellular	na1[e] + gln_L[c] + pro_L[e] -> na1[c] + gln_L[e] + pro_L[c]	1285.59
r1825	Transport, extracellular	na1[e] + ser_L[c] + pro_L[e] -> na1[c] + ser_L[e] + pro_L[c]	1977.96
r1826	Transport, extracellular	na1[e] + met_L[c] + pro_L[e] -> na1[c] + met_L[e] + pro_L[c]	1975.67
r1828	Transport, extracellular	na1[e] + pro_L[e] + phe_L[c] -> na1[c] + phe_L[e] + pro_L[c]	1553.93
r1829	Transport, extracellular	na1[e] + pro_L[e] + tyr_L[c] -> na1[c] + tyr_L[e] + pro_L[c]	1901.87
r1830	Transport, extracellular	na1[e] + cys_L[c] + pro_L[e] -> na1[c] + cys_L[e] + pro_L[c]	1551.6
r1831	Transport, extracellular	na1[e] + pro_L[e] + leu_L[c] -> na1[c] + leu_L[e] + pro_L[c]	1903.97
r1832	Transport, extracellular	na1[e] + asn_L[c] + pro_L[e] -> na1[c] + asn_L[e] + pro_L[c]	1977.96
r1833	Transport, extracellular	na1[e] + pro_L[e] + val_L[c] -> na1[c] + val_L[e] + pro_L[c]	1975.74
r1836	Transport, extracellular	na1[e] + pro_L[e] + ile_L[c] -> na1[c] + ile_L[e] + pro_L[c]	1551.57
r1837	Transport, extracellular	na1[e] + asn_L[e] + gly[c] -> na1[c] + asn_L[c] + gly[e]	-1984.57
r1842	Transport, extracellular	na1[e] + asn_L[e] + trp_L[c] -> na1[c] + asn_L[c] + trp_L[e]	-1982.44
r1847	Transport, extracellular	na1[e] + asn_L[e] + pro_L[c] -> na1[c] + asn_L[c] + pro_L[e]	-1982.35
r1850	Transport, extracellular	na1[e] + asn_L[e] + hom_L[c] -> na1[c] + asn_L[c] + hom_L[e]	-1984.54
r1852	Transport, extracellular	na1[e] + gly[c] + val_L[e] -> na1[c] + gly[e] + val_L[c]	-1982.41
r1857	Transport, extracellular	na1[e] + val_L[e] + trp_L[c] -> na1[c] + trp_L[e] + val_L[c]	-1980.07
r1862	Transport, extracellular	na1[e] + val_L[e] + pro_L[c] -> na1[c] + pro_L[e] + val_L[c]	-1980.14
r1864	Transport, extracellular	na1[e] + thr_L[c] + val_L[e] -> na1[c] + thr_L[e] + val_L[c]	-1982.46
r1865	Transport, extracellular	na1[e] + val_L[e] + hom_L[c] -> na1[c] + hom_L[e] + val_L[c]	-1982.51
r1871	Transport, extracellular	na1[e] + thr_L[e] + met_L[c] -> na1[c] + thr_L[c] + met_L[e]	1977.91
r1873	Transport, extracellular	na1[e] + thr_L[e] + phe_L[c] -> na1[c] + thr_L[c] + phe_L[e]	1556.03
r1874	Transport, extracellular	na1[e] + thr_L[e] + tyr_L[c] -> na1[c] + thr_L[c] + tyr_L[e]	1904.14
r1876	Transport, extracellular	na1[e] + thr_L[e] + leu_L[c] -> na1[c] + thr_L[c] + leu_L[e]	1906.28
r1879	Transport, extracellular	na1[e] + thr_L[e] + val_L[c] -> na1[c] + thr_L[c] + val_L[e]	1977.99
r1881	Transport, extracellular	na1[e] + thr_L[e] + ile_L[c] -> na1[c] + thr_L[c] + ile_L[e]	1553.83
r1883	Transport, extracellular	na1[e] + ala_L[c] + hom_L[e] -> na1[c] + ala_L[e] + hom_L[c]	1980.14
r1884	Transport, extracellular	na1[e] + gln_L[c] + hom_L[e] -> na1[c] + gln_L[e] + hom_L[c]	1287.85
r1885	Transport, extracellular	na1[e] + ser_L[c] + hom_L[e] -> na1[c] + ser_L[e] + hom_L[c]	1980.1
r1886	Transport, extracellular	na1[e] + met_L[c] + hom_L[e] -> na1[c] + met_L[e] + hom_L[c]	1977.87
r1888	Transport, extracellular	na1[e] + hom_L[e] + phe_L[c] -> na1[c] + phe_L[e] + hom_L[c]	1556.1
r1889	Transport, extracellular	na1[e] + hom_L[e] + tyr_L[c] -> na1[c] + tyr_L[e] + hom_L[c]	1904.06
r1890	Transport, extracellular	na1[e] + cys_L[c] + hom_L[e] -> na1[c] + cys_L[e] + hom_L[c]	1553.8
r1891	Transport, extracellular	na1[e] + hom_L[e] + leu_L[c] -> na1[c] + leu_L[e] + hom_L[c]	1906.2
r1893	Transport, extracellular	na1[e] + asn_L[c] + hom_L[e] -> na1[c] + asn_L[e] + hom_L[c]	1980.11
r1894	Transport, extracellular	na1[e] + hom_L[e] + val_L[c] -> na1[c] + val_L[e] + hom_L[c]	1977.92
r1896	Transport, extracellular	na1[e] + hom_L[e] + ile_L[c] -> na1[c] + ile_L[e] + hom_L[c]	1553.79
r1897	Transport, extracellular	na1[e] + gly[c] + ile_L[e] -> na1[c] + gly[e] + ile_L[c]	-1558.11
r1902	Transport, extracellular	na1[e] + ile_L[e] + trp_L[c] -> na1[c] + trp_L[e] + ile_L[c]	-1556.03
r1907	Transport, extracellular	na1[e] + ile_L[e] + pro_L[c] -> na1[c] + pro_L[e] + ile_L[c]	-1555.96
r1910	Transport, extracellular	na1[e] + thr_L[c] + ile_L[e] -> na1[c] + thr_L[e] + ile_L[c]	-1558.27
r1911	Transport, extracellular	na1[e] + ile_L[e] + hom_L[c] -> na1[c] + hom_L[e] + ile_L[c]	-1558.25
r1912	Transport, extracellular	na1[e] + gly[e] + lys_L[c] -> na1[c] + gly[c] + lys_L[e]	919.471
r1913	Transport, extracellular	na1[e] + gly[e] + arg_L[c] -> na1[c] + gly[c] + arg_L[e]	919.655
r1915	Transport, extracellular	na1[e] + gly[e] + his_L[c] -> na1[c] + gly[c] + his_L[e]	919.602
r1917	Transport, extracellular	na1[e] + ala_L[e] + lys_L[c] -> na1[c] + ala_L[c] + lys_L[e]	-1062.89
r1918	Transport, extracellular	na1[e] + ala_L[e] + arg_L[c] -> na1[c] + ala_L[c] + arg_L[e]	-1062.7
r1919	Transport, extracellular	na1[e] + orn[c] + ala_L[e] -> na1[c] + ala_L[c] + orn[e]	-1982.4
r1920	Transport, extracellular	na1[e] + ala_L[e] + his_L[c] -> na1[c] + ala_L[c] + his_L[e]	-1062.76
r1921	Transport, extracellular	na1[e] + ala_L[e] + citr_L[c] -> na1[c] + ala_L[c] + citr_L[e]	-1982.41
r1924	Transport, extracellular	na1[e] + orn[c] + gln_L[e] -> na1[c] + gln_L[c] + orn[e]	-1290.03
r1926	Transport, extracellular	na1[e] + gln_L[e] + citr_L[c] -> na1[c] + gln_L[c] + citr_L[e]	-1290.04
r1928	Transport, extracellular	na1[e] + ser_L[e] + arg_L[c] -> na1[c] + ser_L[c] + arg_L[e]	-1062.69
r1929	Transport, extracellular	na1[e] + orn[c] + ser_L[e] -> na1[c] + ser_L[c] + orn[e]	-1982.38
r1930	Transport, extracellular	na1[e] + ser_L[e] + his_L[c] -> na1[c] + ser_L[c] + his_L[e]	-1062.74
r1931	Transport, extracellular	na1[e] + ser_L[e] + citr_L[c] -> na1[c] + ser_L[c] + citr_L[e]	-1982.39
r1932	Transport, extracellular	na1[e] + lys_L[c] + met_L[e] -> na1[c] + lys_L[e] + met_L[c]	-1060.61
r1933	Transport, extracellular	na1[e] + arg_L[c] + met_L[e] -> na1[c] + arg_L[e] + met_L[c]	-1060.43
r1934	Transport, extracellular	na1[e] + orn[c] + met_L[e] -> na1[c] + met_L[c] + orn[e]	-1980.11
r1935	Transport, extracellular	na1[e] + met_L[e] + his_L[c] -> na1[c] + met_L[c] + his_L[e]	-1060.47
r1936	Transport, extracellular	na1[e] + citr_L[c] + met_L[e] -> na1[c] + met_L[c] + citr_L[e]	-1980.12
r1937	Transport, extracellular	na1[e] + lys_L[c] + trp_L[e] -> na1[c] + lys_L[e] + trp_L[c]	917.292
r1938	Transport, extracellular	na1[e] + arg_L[c] + trp_L[e] -> na1[c] + arg_L[e] + trp_L[c]	917.47
r1940	Transport, extracellular	na1[e] + trp_L[e] + his_L[c] -> na1[c] + his_L[e] + trp_L[c]	917.41
r1944	Transport, extracellular	na1[e] + orn[c] + phe_L[e] -> na1[c] + orn[e] + phe_L[c]	-1558.3
r1946	Transport, extracellular	na1[e] + citr_L[c] + phe_L[e] -> na1[c] + phe_L[c] + citr_L[e]	-1558.33
r1947	Transport, extracellular	na1[e] + lys_L[c] + tyr_L[e] -> na1[c] + lys_L[e] + tyr_L[c]	-986.813
r1948	Transport, extracellular	na1[e] + arg_L[c] + tyr_L[e] -> na1[c] + arg_L[e] + tyr_L[c]	-986.622
r1949	Transport, extracellular	na1[e] + orn[c] + tyr_L[e] -> na1[c] + orn[e] + tyr_L[c]	-1906.32
r1950	Transport, extracellular	na1[e] + tyr_L[e] + his_L[c] -> na1[c] + his_L[e] + tyr_L[c]	-986.677
r1951	Transport, extracellular	na1[e] + citr_L[c] + tyr_L[e] -> na1[c] + tyr_L[c] + citr_L[e]	-1906.33
r1954	Transport, extracellular	na1[e] + orn[c] + cys_L[e] -> na1[c] + cys_L[c] + orn[e]	-1556.07
r1957	Transport, extracellular	na1[e] + lys_L[c] + leu_L[e] -> na1[c] + lys_L[e] + leu_L[c]	-988.95
r1958	Transport, extracellular	na1[e] + arg_L[c] + leu_L[e] -> na1[c] + arg_L[e] + leu_L[c]	-988.772
r1960	Transport, extracellular	na1[e] + leu_L[e] + his_L[c] -> na1[c] + his_L[e] + leu_L[c]	-988.825
r1961	Transport, extracellular	na1[e] + citr_L[c] + leu_L[e] -> na1[c] + leu_L[c] + citr_L[e]	-1908.46
r1962	Transport, extracellular	na1[e] + lys_L[c] + pro_L[e] -> na1[c] + lys_L[e] + pro_L[c]	917.286
r1963	Transport, extracellular	na1[e] + arg_L[c] + pro_L[e] -> na1[c] + arg_L[e] + pro_L[c]	917.46
r1965	Transport, extracellular	na1[e] + pro_L[e] + his_L[c] -> na1[c] + his_L[e] + pro_L[c]	917.416
r1967	Transport, extracellular	na1[e] + asn_L[e] + lys_L[c] -> na1[c] + asn_L[c] + lys_L[e]	-1062.86
r1968	Transport, extracellular	na1[e] + asn_L[e] + arg_L[c] -> na1[c] + asn_L[c] + arg_L[e]	-1062.68
r1969	Transport, extracellular	na1[e] + orn[c] + asn_L[e] -> na1[c] + asn_L[c] + orn[e]	-1982.37
r1970	Transport, extracellular	na1[e] + asn_L[e] + his_L[c] -> na1[c] + asn_L[c] + his_L[e]	-1062.73
r1971	Transport, extracellular	na1[e] + asn_L[e] + citr_L[c] -> na1[c] + asn_L[c] + citr_L[e]	-1982.38
r1972	Transport, extracellular	na1[e] + lys_L[c] + val_L[e] -> na1[c] + lys_L[e] + val_L[c]	-1060.67
r1973	Transport, extracellular	na1[e] + arg_L[c] + val_L[e] -> na1[c] + arg_L[e] + val_L[c]	-1060.51
r1974	Transport, extracellular	na1[e] + orn[c] + val_L[e] -> na1[c] + orn[e] + val_L[c]	-1980.18
r1975	Transport, extracellular	na1[e] + val_L[e] + his_L[c] -> na1[c] + his_L[e] + val_L[c]	-1060.54
r1976	Transport, extracellular	na1[e] + citr_L[c] + val_L[e] -> na1[c] + citr_L[e] + val_L[c]	-1980.21
r1977	Transport, extracellular	na1[e] + thr_L[e] + lys_L[c] -> na1[c] + thr_L[c] + lys_L[e]	919.532
r1978	Transport, extracellular	na1[e] + thr_L[e] + arg_L[c] -> na1[c] + thr_L[c] + arg_L[e]	919.709
r1980	Transport, extracellular	na1[e] + thr_L[e] + his_L[c] -> na1[c] + thr_L[c] + his_L[e]	919.659
r1982	Transport, extracellular	na1[e] + lys_L[c] + hom_L[e] -> na1[c] + lys_L[e] + hom_L[c]	919.502
r1983	Transport, extracellular	na1[e] + arg_L[c] + hom_L[e] -> na1[c] + arg_L[e] + hom_L[c]	919.679
r1985	Transport, extracellular	na1[e] + hom_L[e] + his_L[c] -> na1[c] + his_L[e] + hom_L[c]	919.637
r1989	Transport, extracellular	na1[e] + orn[c] + ile_L[e] -> na1[c] + orn[e] + ile_L[c]	-1556.03
r1991	Transport, extracellular	na1[e] + citr_L[c] + ile_L[e] -> na1[c] + ile_L[c] + citr_L[e]	-1556.06
r1992	Transport, extracellular	gly[c] + lys_L[e] -> gly[e] + lys_L[c]	-921.71
r1993	Transport, extracellular	ala_L[c] + lys_L[e] -> ala_L[e] + lys_L[c]	1060.67
r1995	Transport, extracellular	ser_L[c] + lys_L[e] -> ser_L[e] + lys_L[c]	1060.63
r1996	Transport, extracellular	lys_L[e] + met_L[c] -> lys_L[c] + met_L[e]	1058.37
r1997	Transport, extracellular	lys_L[e] + trp_L[c] -> lys_L[c] + trp_L[e]	-919.521
r1999	Transport, extracellular	lys_L[e] + tyr_L[c] -> lys_L[c] + tyr_L[e]	984.585
r2001	Transport, extracellular	lys_L[e] + leu_L[c] -> lys_L[c] + leu_L[e]	986.72
r2002	Transport, extracellular	lys_L[e] + pro_L[c] -> lys_L[c] + pro_L[e]	-919.515
r2003	Transport, extracellular	asn_L[c] + lys_L[e] -> asn_L[e] + lys_L[c]	1060.63
r2004	Transport, extracellular	lys_L[e] + val_L[c] -> lys_L[c] + val_L[e]	1058.45
r2005	Transport, extracellular	thr_L[c] + lys_L[e] -> thr_L[e] + lys_L[c]	-921.759
r2008	Transport, extracellular	gly[c] + arg_L[e] -> gly[e] + arg_L[c]	-921.88
r2009	Transport, extracellular	ala_L[c] + arg_L[e] -> ala_L[e] + arg_L[c]	1060.49
r2011	Transport, extracellular	ser_L[c] + arg_L[e] -> ser_L[e] + arg_L[c]	1060.46
r2012	Transport, extracellular	arg_L[e] + met_L[c] -> arg_L[c] + met_L[e]	1058.21
r2013	Transport, extracellular	arg_L[e] + trp_L[c] -> arg_L[c] + trp_L[e]	-919.701
r2015	Transport, extracellular	arg_L[e] + tyr_L[c] -> arg_L[c] + tyr_L[e]	984.401
r2017	Transport, extracellular	arg_L[e] + leu_L[c] -> arg_L[c] + leu_L[e]	986.528
r2018	Transport, extracellular	arg_L[e] + pro_L[c] -> arg_L[c] + pro_L[e]	-919.7
r2019	Transport, extracellular	asn_L[c] + arg_L[e] -> asn_L[e] + arg_L[c]	1060.46
r2020	Transport, extracellular	arg_L[e] + val_L[c] -> arg_L[c] + val_L[e]	1058.27
r2021	Transport, extracellular	thr_L[c] + arg_L[e] -> thr_L[e] + arg_L[c]	-921.951
r2022	Transport, extracellular	arg_L[e] + hom_L[c] -> arg_L[c] + hom_L[e]	-921.902
r2026	Transport, extracellular	gln_L[c] + orn[e] -> orn[c] + gln_L[e]	1287.8
r2027	Transport, extracellular	ser_L[c] + orn[e] -> orn[c] + ser_L[e]	1980.16
r2028	Transport, extracellular	met_L[c] + orn[e] -> orn[c] + met_L[e]	1977.89
r2030	Transport, extracellular	orn[e] + phe_L[c] -> orn[c] + phe_L[e]	1556.06
r2031	Transport, extracellular	orn[e] + tyr_L[c] -> orn[c] + tyr_L[e]	1904.09
r2032	Transport, extracellular	cys_L[c] + orn[e] -> orn[c] + cys_L[e]	1553.83
r2035	Transport, extracellular	asn_L[c] + orn[e] -> orn[c] + asn_L[e]	1980.14
r2036	Transport, extracellular	orn[e] + val_L[c] -> orn[c] + val_L[e]	1977.95
r2039	Transport, extracellular	orn[e] + ile_L[c] -> orn[c] + ile_L[e]	1553.79
r2040	Transport, extracellular	gly[c] + his_L[e] -> gly[e] + his_L[c]	-921.823
r2041	Transport, extracellular	ala_L[c] + his_L[e] -> ala_L[e] + his_L[c]	1060.53
r2043	Transport, extracellular	ser_L[c] + his_L[e] -> ser_L[e] + his_L[c]	1060.51
r2044	Transport, extracellular	met_L[c] + his_L[e] -> met_L[e] + his_L[c]	1058.25
r2045	Transport, extracellular	his_L[e] + trp_L[c] -> trp_L[e] + his_L[c]	-919.638
r2047	Transport, extracellular	his_L[e] + tyr_L[c] -> tyr_L[e] + his_L[c]	984.452
r2049	Transport, extracellular	his_L[e] + leu_L[c] -> leu_L[e] + his_L[c]	986.595
r2050	Transport, extracellular	his_L[e] + pro_L[c] -> pro_L[e] + his_L[c]	-919.637
r2051	Transport, extracellular	asn_L[c] + his_L[e] -> asn_L[e] + his_L[c]	1060.51
r2052	Transport, extracellular	his_L[e] + val_L[c] -> val_L[e] + his_L[c]	1058.32
r2053	Transport, extracellular	thr_L[c] + his_L[e] -> thr_L[e] + his_L[c]	-921.89
r2054	Transport, extracellular	his_L[e] + hom_L[c] -> hom_L[e] + his_L[c]	-921.87
r2057	Transport, extracellular	ala_L[c] + citr_L[e] -> ala_L[e] + citr_L[c]	1980.19
r2058	Transport, extracellular	gln_L[c] + citr_L[e] -> gln_L[e] + citr_L[c]	1287.82
r2059	Transport, extracellular	ser_L[c] + citr_L[e] -> ser_L[e] + citr_L[c]	1980.16
r2060	Transport, extracellular	met_L[c] + citr_L[e] -> citr_L[c] + met_L[e]	1977.9
r2062	Transport, extracellular	phe_L[c] + citr_L[e] -> citr_L[c] + phe_L[e]	1556.08
r2063	Transport, extracellular	tyr_L[c] + citr_L[e] -> citr_L[c] + tyr_L[e]	1904.11
r2064	Transport, extracellular	cys_L[c] + citr_L[e] -> cys_L[e] + citr_L[c]	1553.86
r2065	Transport, extracellular	leu_L[c] + citr_L[e] -> citr_L[c] + leu_L[e]	1906.24
r2067	Transport, extracellular	asn_L[c] + citr_L[e] -> asn_L[e] + citr_L[c]	1980.16
r2068	Transport, extracellular	citr_L[e] + val_L[c] -> citr_L[c] + val_L[e]	1977.97
r2071	Transport, extracellular	ile_L[c] + citr_L[e] -> citr_L[c] + ile_L[e]	1553.82
THRGLNexR	Transport, extracellular	gln_L[c] + thr_L[e] <=> gln_L[e] + thr_L[c]	1290.06
ALAGLNNaEx	Transport, extracellular	na1[e] + ala_L[e] + gln_L[c] -> na1[c] + ala_L[c] + gln_L[e]	-694.517
ALATHRNaEx	Transport, extracellular	na1[e] + ala_L[e] + thr_L[c] -> na1[c] + ala_L[c] + thr_L[e]	-1984.64
ASNGLNNaEx	Transport, extracellular	na1[e] + asn_L[e] + gln_L[c] -> na1[c] + asn_L[c] + gln_L[e]	-694.532
ASNTHRNaEx	Transport, extracellular	na1[e] + asn_L[e] + thr_L[c] -> na1[c] + asn_L[c] + thr_L[e]	-1984.65
CYSTHRNaEx	Transport, extracellular	na1[e] + cys_L[e] + thr_L[c] -> na1[c] + cys_L[c] + thr_L[e]	-1558.26
GLNTHRNaEx	Transport, extracellular	na1[e] + gln_L[e] + thr_L[c] -> na1[c] + gln_L[c] + thr_L[e]	-1292.26
SERGLNNaEx	Transport, extracellular	na1[e] + gln_L[c] + ser_L[e] -> na1[c] + gln_L[e] + ser_L[c]	-694.588
SERTHRNaEx	Transport, extracellular	na1[e] + ser_L[e] + thr_L[c] -> na1[c] + ser_L[c] + thr_L[e]	-1984.64
THRALANaEx	Transport, extracellular	na1[e] + ala_L[c] + thr_L[e] -> na1[c] + ala_L[e] + thr_L[c]	1980.22
THRASNNaEx	Transport, extracellular	na1[e] + asn_L[c] + thr_L[e] -> na1[c] + asn_L[e] + thr_L[c]	1980.19
THRCYSNaEx	Transport, extracellular	na1[e] + cys_L[c] + thr_L[e] -> na1[c] + cys_L[e] + thr_L[c]	1553.82
THRGLNNaEx	Transport, extracellular	na1[e] + gln_L[c] + thr_L[e] -> na1[c] + gln_L[e] + thr_L[c]	1287.84
THRSERNaEx	Transport, extracellular	na1[e] + ser_L[c] + thr_L[e] -> na1[c] + ser_L[e] + thr_L[c]	1980.14
PROt2r	Transport, extracellular	h[e] + pro_L[e] <=> h[c] + pro_L[c]	1804.92
ADNt4	Transport, extracellular	na1[e] + adn[e] -> na1[c] + adn[c]	-833.718
ALADGLYexR	Transport, extracellular	ala_D[e] + gly[c] <=> ala_D[c] + gly[e]	-1290
ALAGLYexR	Transport, extracellular	ala_L[e] + gly[c] <=> ala_L[c] + gly[e]	-1982.36
BTNt2	Transport, extracellular	h[e] + btn[e] <=> h[c] + btn[c]	883.009
CYSGLYexR	Transport, extracellular	cys_L[c] + gly[e] <=> cys_L[e] + gly[c]	1556.03
HIStN1	Transport, extracellular	h[c] + 2 na1[e] + his_L[e] <=> h[e] + 2 na1[c] + his_L[c]	-885.315
SERDGLYexR	Transport, extracellular	gly[c] + ser_D[e] <=> gly[e] + ser_D[c]	-1289.99
SERGLYexR	Transport, extracellular	gly[c] + ser_L[e] <=> gly[e] + ser_L[c]	-1982.35
TRPt4	Transport, extracellular	na1[e] + trp_L[e] -> na1[c] + trp_L[c]	919.59
TYRt4	Transport, extracellular	na1[e] + tyr_L[e] -> na1[c] + tyr_L[c]	-984.489
VALt4	Transport, extracellular	na1[e] + val_L[e] -> na1[c] + val_L[c]	-1058.38
COAtm	Transport, mitochondrial	coa[c] <=> coa[m]	820.854
OCCOAtm	Transport, mitochondrial	occoa[c] -> occoa[m]	705.101
r0838	Transport, mitochondrial	nh4[c] <=> nh4[m]	-833.299
r1155	Transport, mitochondrial	h[c] + 2obut[c] -> h[m] + 2obut[m]	-764.422
r1291	Transport, mitochondrial	ppcoa[c] <=> ppcoa[m]	820.86
PYRt2m	Transport, mitochondrial	h[c] + pyr[c] -> h[m] + pyr[m]	-1014.57
AKGMALtm	Transport, mitochondrial	akg[m] + mal_L[c] <=> akg[c] + mal_L[m]	-894.89
GLYtm	Transport, mitochondrial	gly[c] <=> gly[m]	-876.874
FUMTSULtm	Transport, mitochondrial	fum[c] + tsul[m] <=> fum[m] + tsul[c]	1021.27
FUMSO3tm	Transport, mitochondrial	so3[m] + fum[c] <=> so3[c] + fum[m]	1021.27
MALSO4tm	Transport, mitochondrial	mal_L[c] + so4[m] <=> mal_L[m] + so4[c]	-1021.26
ACACt2m	Transport, mitochondrial	h[c] + acac[c] -> h[m] + acac[m]	-1014.57
CITtam	Transport, mitochondrial	cit[c] + mal_L[m] <=> cit[m] + mal_L[c]	1233.13
r1459	Transport, nuclear	ppi[c] <=> ppi[n]	-736.002
STCOAtx	Transport, peroxisomal	stcoa[c] <=> stcoa[x]	-854.135

## Sheet: marker_reaction_enzymes
ID	OFFICIAL_GENE_SYMBOL	Gene Name	EC_NUMBER	OMIM_DISEASE	GENETIC_ASSOCIATION_DB_DISEASE	HIV_INTERACTION	GOTERM_MF_FAT	KEGG_PATHWAY	HIV_INTERACTION_PUBMED_ID	PUBMED_ID
26275	HIBCH,	3-hydroxyisobutyryl-Coenzyme A hydrolase	3.1.2.4,	3-hydroxyisobutryl-CoA hydrolase deficiency,			GO:0003860~3-hydroxyisobutyryl-CoA hydrolase activity,GO:0016289~CoA hydrolase activity,GO:0016790~thiolester hydrolase activity,	hsa00280:Valine, leucine and isoleucine degradation,hsa00410:beta-Alanine metabolism,hsa00640:Propanoate metabolism,		11580916,12477932,15489334,15815621,17160907,17474147,8125298,8188708,8824301,9373149,
22978	NT5C2,	5'-nucleotidase, cytosolic II	3.1.3.5,				GO:0000166~nucleotide binding,GO:0000287~magnesium ion binding,GO:0008252~nucleotidase activity,GO:0008253~5'-nucleotidase activity,GO:0016791~phosphatase activity,GO:0043167~ion binding,GO:0043169~cation binding,GO:0046872~metal ion binding,	hsa00230:Purine metabolism,hsa00240:Pyrimidine metabolism,hsa00760:Nicotinate and nicotinamide metabolism,		12477932,15164054,15489334,15923058,16189514,17350683,17405878,18669648,18775979,19428333,2839573,2848805,7999131,
515	ATP5F1,	ATP synthase, H+ transporting, mitochondrial F0 complex, subunit B1	3.6.1.14,				GO:0015077~monovalent inorganic cation transmembrane transporter activity,GO:0015078~hydrogen ion transmembrane transporter activity,GO:0015399~primary active transmembrane transporter activity,GO:0015405~P-P-bond-hydrolysis-driven transmembrane transporter activity,GO:0016820~hydrolase activity, acting on acid anhydrides, catalyzing transmembrane movement of substances,GO:0016887~ATPase activity…	hsa00190:Oxidative phosphorylation,hsa05010:Alzheimer's disease,hsa05012:Parkinson's disease,hsa05016:Huntington's disease,		11827452,12110673,12477932,14749816,15489334,16710414,17353931,1831354,2868890,2883974,7706317,8125298,9373149,9461222,9834036,
516	ATP5G1,	ATP synthase, H+ transporting, mitochondrial F0 complex, subunit C1 (subunit 9)	3.6.1.14,				GO:0008289~lipid binding,GO:0015077~monovalent inorganic cation transmembrane transporter activity,GO:0015078~hydrogen ion transmembrane transporter activity,GO:0015399~primary active transmembrane transporter activity,GO:0015405~P-P-bond-hydrolysis-driven transmembrane transporter activity,GO:0016820~hydrolase activity, acting on acid anhydrides, catalyzing transmembrane movement of substances,G…	hsa00190:Oxidative phosphorylation,hsa05010:Alzheimer's disease,hsa05012:Parkinson's disease,hsa05016:Huntington's disease,		11076863,11230166,12477932,14702039,14749816,15489334,15489336,15906478,16381901,2883974,7698763,8328972,8485160,8889548,9461222,9834036,
517	ATP5G2,	ATP synthase, H+ transporting, mitochondrial F0 complex, subunit C2 (subunit 9)	3.6.1.14,				GO:0008289~lipid binding,GO:0015077~monovalent inorganic cation transmembrane transporter activity,GO:0015078~hydrogen ion transmembrane transporter activity,GO:0022890~inorganic cation transmembrane transporter activity,	hsa00190:Oxidative phosphorylation,hsa05010:Alzheimer's disease,hsa05012:Parkinson's disease,hsa05016:Huntington's disease,		11329013,12477932,14749816,15489334,16303743,16541075,2883974,7698763,7706317,8328972,8485160,9461222,9834036,
518	ATP5G3,	ATP synthase, H+ transporting, mitochondrial F0 complex, subunit C3 (subunit 9)	3.6.1.14,				GO:0008289~lipid binding,GO:0015077~monovalent inorganic cation transmembrane transporter activity,GO:0015078~hydrogen ion transmembrane transporter activity,GO:0022890~inorganic cation transmembrane transporter activity,	hsa00190:Oxidative phosphorylation,hsa05010:Alzheimer's disease,hsa05012:Parkinson's disease,hsa05016:Huntington's disease,		12477932,14667819,14702039,14749816,15489334,15815621,2883974,7698763,8328972,9461222,9834036,
521	Atp5i,	ATP synthase, H+ transporting, mitochondrial F0 complex, subunit E	3.6.1.14,				GO:0015077~monovalent inorganic cation transmembrane transporter activity,GO:0015078~hydrogen ion transmembrane transporter activity,GO:0016887~ATPase activity,GO:0022890~inorganic cation transmembrane transporter activity,	hsa00190:Oxidative phosphorylation,		10409428,11939412,12110673,12471886,12477932,12628343,12745923,14749816,15489334,16682002,18060860,8702853,9461222,9834036,
9551	ATP5J2,	ATP synthase, H+ transporting, mitochondrial F0 complex, subunit F2	3.6.1.14,				GO:0016887~ATPase activity,	hsa00190:Oxidative phosphorylation,		11042152,11959398,12110673,12471886,12477932,12628343,12690205,12745923,12853948,14702039,14749816,15489334,16169070,8125298,9373149,9461222,9653160,9834036,
522	Atp5j,	ATP synthase, H+ transporting, mitochondrial F0 complex, subunit F6	3.6.1.14,				GO:0015077~monovalent inorganic cation transmembrane transporter activity,GO:0015078~hydrogen ion transmembrane transporter activity,GO:0015399~primary active transmembrane transporter activity,GO:0015405~P-P-bond-hydrolysis-driven transmembrane transporter activity,GO:0016820~hydrolase activity, acting on acid anhydrides, catalyzing transmembrane movement of substances,GO:0016887~ATPase activity…	hsa00190:Oxidative phosphorylation,hsa05010:Alzheimer's disease,hsa05012:Parkinson's disease,hsa05016:Huntington's disease,		10830953,11230166,12110673,12471886,12477932,12628343,12745923,1286669,14633154,14749816,15489334,15709156,15785006,16230521,16532470,17456993,18243211,1825642,1830479,19106112,7698763,9461222,9732751,9834036,
10632	atp5l,	ATP synthase, H+ transporting, mitochondrial F0 complex, subunit G	3.6.1.14,				GO:0015077~monovalent inorganic cation transmembrane transporter activity,GO:0015078~hydrogen ion transmembrane transporter activity,GO:0016887~ATPase activity,GO:0022890~inorganic cation transmembrane transporter activity,	hsa00190:Oxidative phosphorylation,		11042152,11076863,11230166,12110673,12471886,12477932,12628343,12745923,14749816,15489334,15489336,16381901,17353931,9461222,9834036,
10476	atp5h,	ATP synthase, H+ transporting, mitochondrial F0 complex, subunit d	3.6.1.14,				GO:0015077~monovalent inorganic cation transmembrane transporter activity,GO:0015078~hydrogen ion transmembrane transporter activity,GO:0016887~ATPase activity,GO:0022890~inorganic cation transmembrane transporter activity,	hsa00190:Oxidative phosphorylation,hsa05010:Alzheimer's disease,hsa05012:Parkinson's disease,hsa05016:Huntington's disease,		11042152,12110673,12471886,12477932,12628343,12745923,14702039,14749816,15489334,19110265,7509337,9461222,9834036,
498	Atp5a1,	ATP synthase, H+ transporting, mitochondrial F1 complex, alpha subunit 1, cardiac muscle	3.6.1.14,				GO:0000166~nucleotide binding,GO:0001882~nucleoside binding,GO:0001883~purine nucleoside binding,GO:0005524~ATP binding,GO:0015077~monovalent inorganic cation transmembrane transporter activity,GO:0015078~hydrogen ion transmembrane transporter activity,GO:0015399~primary active transmembrane transporter activity,GO:0015405~P-P-bond-hydrolysis-driven transmembrane transporter activity,GO:0016820~h…	hsa00190:Oxidative phosphorylation,hsa05010:Alzheimer's disease,hsa05012:Parkinson's disease,hsa05016:Huntington's disease,		10077593,11381144,11410595,11741979,12110673,12477932,12614671,14702039,14743216,14749816,15324660,15489334,15862967,15952740,1602151,16344560,16378738,16714292,17643490,1830491,19110265,19405953,4517936,7498159,8065448,8086450,8168843,8428659,9284928,9461222,9834036,
506	ATP5B,	ATP synthase, H+ transporting, mitochondrial F1 complex, beta polypeptide	3.6.3.14,				GO:0000166~nucleotide binding,GO:0001882~nucleoside binding,GO:0001883~purine nucleoside binding,GO:0005509~calcium ion binding,GO:0005524~ATP binding,GO:0008034~lipoprotein binding,GO:0008553~hydrogen-exporting ATPase activity, phosphorylative mechanism,GO:0015077~monovalent inorganic cation transmembrane transporter activity,GO:0015078~hydrogen ion transmembrane transporter activity,GO:0015399~…	hsa00190:Oxidative phosphorylation,hsa05010:Alzheimer's disease,hsa05012:Parkinson's disease,hsa05016:Huntington's disease,		10077593,11410595,11790298,12110673,12206899,12477932,12511957,14499622,14749816,15242332,15324660,15489334,15635413,15952740,1602151,16169070,16230521,16236267,16751257,16890199,16927672,16996794,17510399,17643490,18063578,18284036,2687158,2870059,2896550,2900241,4517936,7798271,8065448,9461222,9834036,
513	Atp5d,	ATP synthase, H+ transporting, mitochondrial F1 complex, delta subunit	3.6.1.14,				GO:0000166~nucleotide binding,GO:0001882~nucleoside binding,GO:0001883~purine nucleoside binding,GO:0005524~ATP binding,GO:0015077~monovalent inorganic cation transmembrane transporter activity,GO:0015078~hydrogen ion transmembrane transporter activity,GO:0015399~primary active transmembrane transporter activity,GO:0015405~P-P-bond-hydrolysis-driven transmembrane transporter activity,GO:0016820~h…	hsa00190:Oxidative phosphorylation,hsa05010:Alzheimer's disease,hsa05012:Parkinson's disease,hsa05016:Huntington's disease,		11533724,12110673,12477932,12539966,1286669,12887009,14702039,14749816,14749837,15057824,1531933,15489334,4517936,9657145,9834036,
514	ATP5E,ATP5EP2,	ATP synthase, H+ transporting, mitochondrial F1 complex, epsilon subunit pseudogene 2; ATP synthase, H+ transporting, mitochondrial F1 complex, epsilon subunit	3.6.3.14,				GO:0015077~monovalent inorganic cation transmembrane transporter activity,GO:0015078~hydrogen ion transmembrane transporter activity,GO:0015399~primary active transmembrane transporter activity,GO:0015405~P-P-bond-hydrolysis-driven transmembrane transporter activity,GO:0016820~hydrolase activity, acting on acid anhydrides, catalyzing transmembrane movement of substances,GO:0016887~ATPase activity…	hsa00190:Oxidative phosphorylation,hsa05010:Alzheimer's disease,hsa05012:Parkinson's disease,hsa05016:Huntington's disease,		10727396,10931946,11173840,11780052,12110673,12477932,14702039,14749816,15057823,15489334,17924679,19016746,2137333,4517936,9461222,9834036,
509	Atp5c1,	ATP synthase, H+ transporting, mitochondrial F1 complex, gamma polypeptide 1	3.6.1.14,				GO:0015077~monovalent inorganic cation transmembrane transporter activity,GO:0015078~hydrogen ion transmembrane transporter activity,GO:0015399~primary active transmembrane transporter activity,GO:0015405~P-P-bond-hydrolysis-driven transmembrane transporter activity,GO:0016820~hydrolase activity, acting on acid anhydrides, catalyzing transmembrane movement of substances,GO:0016887~ATPase activity…	hsa00190:Oxidative phosphorylation,hsa05010:Alzheimer's disease,hsa05012:Parkinson's disease,hsa05016:Huntington's disease,		11533724,11744705,12110673,12477932,12887009,14749816,14749837,15164054,15489334,16169070,17686786,4517936,8065448,8168843,8227057,9461222,9657145,9834036,
215	Abcd1,	ATP-binding cassette, sub-family D (ALD), member 1		Adrenoleukodystrophy,Adrenomyeloneuropathy,	adrenoleukodystrophy,		GO:0000166~nucleotide binding,GO:0001882~nucleoside binding,GO:0001883~purine nucleoside binding,GO:0005319~lipid transporter activity,GO:0005324~long-chain fatty acid transporter activity,GO:0005325~peroxisomal fatty acyl CoA transporter activity,GO:0005524~ATP binding,GO:0015245~fatty acid transporter activity,GO:0015246~fatty acyl transporter activity,GO:0015399~primary active transmembrane tr…	hsa02010:ABC transporters,		10190819,10369742,10480364,10551832,10704444,10737980,10777694,10980539,11248239,11438993,11748843,11798073,11810273,11883941,11992258,12175782,12210797,12477932,12509471,12530690,12579499,12624723,14556192,14767898,15001567,15489334,15643618,15772093,15772651,15781447,16018167,16087056,16331554,17285533,1746561,17504626,17542813,17662307,17761426,17828604,18306728,18481121,18669648,18691976,1897…
4905	Nsf,	N-ethylmaleimide-sensitive factor	3.6.4.6,		progressive supranuclear palsy,		GO:0000149~SNARE binding,GO:0000166~nucleotide binding,GO:0000287~magnesium ion binding,GO:0001882~nucleoside binding,GO:0001883~purine nucleoside binding,GO:0004175~endopeptidase activity,GO:0004176~ATP-dependent peptidase activity,GO:0004252~serine-type endopeptidase activity,GO:0005524~ATP binding,GO:0008022~protein C-terminus binding,GO:0008233~peptidase activity,GO:0008236~serine-type peptid…			10196135,10458612,10683148,10747018,10903204,10954749,11403936,11461150,11511104,11680900,12011465,12130635,12477932,1315316,14567912,14607937,14769786,15293277,15322554,15489334,15858065,16169070,16461345,17353931,17510209,18077426,18836734,19086053,19167335,19208619,7622514,8013662,8051214,8636227,8875895,8940356,8973549,9286697,9325254,9349823,9362506,9697855,
38	ACAT1,	acetyl-Coenzyme A acetyltransferase 1	2.3.1.9,	Alpha-methylacetoacetic aciduria,	lipids; lipoproteins,		GO:0003985~acetyl-CoA C-acetyltransferase activity,GO:0016407~acetyltransferase activity,GO:0016408~C-acyltransferase activity,GO:0016453~C-acetyltransferase activity,GO:0030955~potassium ion binding,GO:0031420~alkali metal ion binding,GO:0043167~ion binding,GO:0043169~cation binding,GO:0046872~metal ion binding,	hsa00071:Fatty acid metabolism,hsa00072:Synthesis and degradation of ketone bodies,hsa00280:Valine, leucine and isoleucine degradation,hsa00310:Lysine degradation,hsa00380:Tryptophan metabolism,hsa00620:Pyruvate metabolism,hsa00640:Propanoate metabolism,hsa00650:Butanoate metabolism,hsa00900:Terpenoid backbone biosynthesis,		12477932,12754704,1346617,1351831,15128923,15158756,15242332,15489334,1627655,16341674,1684944,16935016,1715688,17236799,17353931,17371050,17691824,18000807,18029348,18393248,18511318,18542101,18562306,18779653,18971559,18996102,19112833,19269342,1979337,3709573,4690360,7173255,7728148,7749408,7907600,8103405,9380443,9607396,9700610,9744475,
39	Acat2,	acetyl-Coenzyme A acetyltransferase 2	2.3.1.9,		atherosclerosis, coronary; lipoproteins,hyperlipidemia,lipids; lipoproteins,metabolism disorders,		GO:0003985~acetyl-CoA C-acetyltransferase activity,GO:0016407~acetyltransferase activity,GO:0016408~C-acyltransferase activity,GO:0016453~C-acetyltransferase activity,	hsa00071:Fatty acid metabolism,hsa00072:Synthesis and degradation of ketone bodies,hsa00280:Valine, leucine and isoleucine degradation,hsa00310:Lysine degradation,hsa00380:Tryptophan metabolism,hsa00620:Pyruvate metabolism,hsa00640:Propanoate metabolism,hsa00650:Butanoate metabolism,hsa00900:Terpenoid backbone biosynthesis,		12477932,12621162,14557872,14574404,14702039,15158756,15342556,15489334,15733928,16195894,17353931,17919884,17950700,18000807,18269457,18660489,18996102,19071091,19282863,2475872,6150136,7911016,8125298,8812443,9373149,
30	Acaa1,	acetyl-Coenzyme A acyltransferase 1	2.3.1.16,	Pseudo-Zellweger syndrome,	high altitude performance,nephropathy, diabetic,		GO:0003988~acetyl-CoA C-acyltransferase activity,GO:0016408~C-acyltransferase activity,	hsa00071:Fatty acid metabolism,hsa00280:Valine, leucine and isoleucine degradation,hsa01040:Biosynthesis of unsaturated fatty acids,hsa03320:PPAR signaling pathway,		10231028,10960480,11418601,12477932,14621081,15489334,16385653,1679347,18029348,18281296,2630187,2726492,2882519,3194209,7750978,8619474,9110174,
2180	ACSL1,	acyl-CoA synthetase long-chain family member 1	6.2.1.3,				GO:0000166~nucleotide binding,GO:0000287~magnesium ion binding,GO:0001882~nucleoside binding,GO:0001883~purine nucleoside binding,GO:0004467~long-chain-fatty-acid-CoA ligase activity,GO:0005524~ATP binding,GO:0015645~fatty-acid ligase activity,GO:0016877~ligase activity, forming carbon-sulfur bonds,GO:0017076~purine nucleotide binding,GO:0030554~adenyl nucleotide binding,GO:0032553~ribonucleotide…	hsa00071:Fatty acid metabolism,hsa03320:PPAR signaling pathway,hsa04920:Adipocytokine signaling pathway,		10548543,12477932,14702039,15292367,1531127,15489334,1599407,16054041,1607358,16834775,18660489,2007410,2341402,2973813,7429333,7490105,7948012,8399326,8584017,8889548,
35	Acads,	acyl-Coenzyme A dehydrogenase, C-2 to C-3 short chain	1.3.99.2,	Acyl-CoA dehydrogenase, short-chain, deficiency of,	acyl-CoA dehydrogenase (SCAD) deficiency,medium-chain acyl-CoA dehydrogenase deficiency,		GO:0000062~acyl-CoA binding,GO:0000166~nucleotide binding,GO:0001882~nucleoside binding,GO:0001883~purine nucleoside binding,GO:0003995~acyl-CoA dehydrogenase activity,GO:0004085~butyryl-CoA dehydrogenase activity,GO:0005504~fatty acid binding,GO:0008289~lipid binding,GO:0009055~electron carrier activity,GO:0017076~purine nucleotide binding,GO:0030554~adenyl nucleotide binding,GO:0031406~carboxyl…	hsa00071:Fatty acid metabolism,hsa00280:Valine, leucine and isoleucine degradation,hsa00650:Butanoate metabolism,		11134486,12220177,12477932,12706374,1286669,15489334,15902559,16376132,16729965,1692038,18045290,18054510,18175080,18184946,18523805,18539996,18977676,2565344,8276399,8503850,8889548,9383286,9499414,
34	ACADM,	acyl-Coenzyme A dehydrogenase, C-4 to C-12 straight chain	1.3.99.3,	Acyl-CoA dehydrogenase, medium chain, deficiency of,	lipid metabolism disorders,MCADD (medium chain acyl-coA hydrhydrogenase defin,medium-chain acyl-CoA dehydrogenase (MCAD) deficiency,medium-chain acyl-CoA dehydrogenase deficiency,SCAD deficiency,		GO:0000166~nucleotide binding,GO:0001882~nucleoside binding,GO:0001883~purine nucleoside binding,GO:0003995~acyl-CoA dehydrogenase activity,GO:0009055~electron carrier activity,GO:0017076~purine nucleotide binding,GO:0030554~adenyl nucleotide binding,GO:0048037~cofactor binding,GO:0050660~FAD binding,GO:0050662~coenzyme binding,	hsa00071:Fatty acid metabolism,hsa00280:Valine, leucine and isoleucine degradation,hsa00410:beta-Alanine metabolism,hsa00640:Propanoate metabolism,hsa03320:PPAR signaling pathway,		10767181,11263545,11349232,11409868,11486912,11517203,12477932,12522104,12562916,12914524,1363805,14692513,14970748,15159392,15171999,15489334,15832312,15896661,15902558,15975918,16128823,16236267,16291504,16617240,1671131,1679031,1684086,16917729,16959974,17186412,1729890,1731887,17539907,18188679,18241067,18660489,18927092,1902818,19064330,2251268,2393404,2394825,3035565,3462713,3597357,3786030…
33	acadl,	acyl-Coenzyme A dehydrogenase, long chain	1.3.99.13,	Acyl-CoA dehydrogenase, long chain, deficiency of,			GO:0000166~nucleotide binding,GO:0001882~nucleoside binding,GO:0001883~purine nucleoside binding,GO:0003995~acyl-CoA dehydrogenase activity,GO:0004466~long-chain-acyl-CoA dehydrogenase activity,GO:0009055~electron carrier activity,GO:0017076~purine nucleotide binding,GO:0030554~adenyl nucleotide binding,GO:0048037~cofactor binding,GO:0050660~FAD binding,GO:0050662~coenzyme binding,	hsa00071:Fatty acid metabolism,hsa03320:PPAR signaling pathway,		10832093,12477932,1438359,14702039,15489334,1559716,15815621,1607358,1774065,18660489,1945557,2000272,4022672,8739959,9003458,9714723,
51	ACOX1,	acyl-Coenzyme A oxidase 1, palmitoyl	1.3.3.6,	Peroxisomal acyl-CoA oxidase deficiency,			GO:0000166~nucleotide binding,GO:0001882~nucleoside binding,GO:0001883~purine nucleoside binding,GO:0003995~acyl-CoA dehydrogenase activity,GO:0003997~acyl-CoA oxidase activity,GO:0009055~electron carrier activity,GO:0016634~oxidoreductase activity, acting on the CH-CH group of donors, oxygen as acceptor,GO:0017076~purine nucleotide binding,GO:0030554~adenyl nucleotide binding,GO:0047485~protein …	hsa00071:Fatty acid metabolism,hsa00592:alpha-Linolenic acid metabolism,hsa01040:Biosynthesis of unsaturated fatty acids,hsa03320:PPAR signaling pathway,		10856712,10960480,11076863,11230166,11815777,12477932,1464743,14702039,15489334,15489336,16381901,16396496,17081983,17458872,18281296,18536048,18660489,18669648,7668838,7876265,8040306,8117268,8125298,8159712,8507686,8798738,9373149,
353	Aprt,	adenine phosphoribosyltransferase	2.4.2.7,	Urolithiasis, 2,8-dihydroxyadenine,			GO:0000166~nucleotide binding,GO:0001882~nucleoside binding,GO:0001883~purine nucleoside binding,GO:0002054~nucleobase binding,GO:0002055~adenine binding,GO:0002060~purine binding,GO:0003999~adenine phosphoribosyltransferase activity,GO:0016208~AMP binding,GO:0016763~transferase activity, transferring pentosyl groups,GO:0017076~purine nucleotide binding,GO:0030554~adenyl nucleotide binding,GO:003…	hsa00230:Purine metabolism,		10369268,10479485,10481956,10937693,11243733,116697,12477932,12665801,1353080,14674717,15196008,15489334,15571218,16130169,17126311,17353931,1746557,17974005,18399692,1985452,2067530,2135300,2227951,2502918,3343350,3531209,3554238,3680503,3684585,457664,7660991,7685481,7915931,8455250,869896,8882882,8889579,9298830,9521589,
50808	ak3,	adenylate kinase 3	2.7.4.10,				GO:0000166~nucleotide binding,GO:0001882~nucleoside binding,GO:0001883~purine nucleoside binding,GO:0004017~adenylate kinase activity,GO:0005524~ATP binding,GO:0005525~GTP binding,GO:0016776~phosphotransferase activity, phosphate group as acceptor,GO:0017076~purine nucleotide binding,GO:0019001~guanyl nucleotide binding,GO:0019201~nucleotide kinase activity,GO:0019205~nucleobase, nucleoside, nucl…	hsa00240:Pyrimidine metabolism,		11485571,12477932,14702039,15164053,15489334,182062,
124, 125	ADH1A,ADH1B,Adh1c,	alcohol dehydrogenase 1B (class I), beta polypeptide; alcohol dehydrogenase 1A (class I), alpha polypeptide; alcohol dehydrogenase 1C (class I), gamma polypeptide	1.1.1.1,	Alcoholism, susceptibility to,Does parental expressed emotion moderate genetic effects in ADHD? An exploration using a genome wide association scan,Parkinson disease, susceptibility to,	aerodigestive tract cancers,alcohol abuse,alcohol abuse cirrhosis, alcoholic pancreatitis, chronic,alcohol abuse; liver disease, alcoholic,alcohol abuse; smoking behavior,alcohol consumption blood pressure, arterial cholesterol, HDL heart disease, ischemic,alcohol dependence,alcohol dependency,alcohol elimination,alcohol-elimination rates,alcoholism,alcoholism and alcoholic liver disease,atherosc…		GO:0004022~alcohol dehydrogenase (NAD) activity,GO:0004024~alcohol dehydrogenase activity, zinc-dependent,GO:0008270~zinc ion binding,GO:0030528~transcription regulator activity,GO:0043167~ion binding,GO:0043169~cation binding,GO:0046872~metal ion binding,GO:0046914~transition metal ion binding,	hsa00010:Glycolysis / Gluconeogenesis,hsa00071:Fatty acid metabolism,hsa00350:Tyrosine metabolism,hsa00830:Retinol metabolism,hsa00980:Metabolism of xenobiotics by cytochrome P450,hsa00982:Drug metabolism,		10405330,10424757,10733556,11045794,11051375,11117576,11159741,11207350,11238183,11259352,11274460,11303599,11356310,11398342,11410735,11584144,11696658,11700261,11740346,11748356,11752857,11781503,11781511,11802217,11966948,12080432,12081471,12089173,12153842,12173598,12189549,12211622,12213289,12244546,12351924,12376487,12392591,12419833,12452180,12461493,12477932,12500098,12505800,12517056,125…
128	ADH5,ADH5P4,	alcohol dehydrogenase 5 (class III), chi polypeptide, pseudogene 4; alcohol dehydrogenase 5 (class III), chi polypeptide	1.1.1.-,1.1.1.1,1.1.1.284,		alcohol dependence,asthma,drug dependence,		GO:0000166~nucleotide binding,GO:0004022~alcohol dehydrogenase (NAD) activity,GO:0005504~fatty acid binding,GO:0008270~zinc ion binding,GO:0008289~lipid binding,GO:0009055~electron carrier activity,GO:0016620~oxidoreductase activity, acting on the aldehyde or oxo group of donors, NAD or NADP as acceptor,GO:0018467~formaldehyde dehydrogenase activity,GO:0031406~carboxylic acid binding,GO:0033293~m…	hsa00010:Glycolysis / Gluconeogenesis,hsa00071:Fatty acid metabolism,hsa00350:Tyrosine metabolism,hsa00680:Methane metabolism,hsa00830:Retinol metabolism,hsa00980:Metabolism of xenobiotics by cytochrome P450,hsa00982:Drug metabolism,		10661511,10978156,12004059,12141816,12196016,12477932,12484756,12604204,1446828,1453005,14608084,15489334,16169070,16201836,16605250,16685648,17185388,17543375,18095160,18331377,18636124,18996923,19165527,2679557,2818582,2934732,2936344,3365377,3365377],6375718,6424546,7948423,8460164,8494891,8503936,9018047,
130	ADH6,	alcohol dehydrogenase 6 (class V)	1.1.1.1,		alcohol dependence,drug dependence,		GO:0004022~alcohol dehydrogenase (NAD) activity,GO:0004024~alcohol dehydrogenase activity, zinc-dependent,GO:0008270~zinc ion binding,GO:0009055~electron carrier activity,GO:0043167~ion binding,GO:0043169~cation binding,GO:0046872~metal ion binding,GO:0046914~transition metal ion binding,	hsa00010:Glycolysis / Gluconeogenesis,hsa00071:Fatty acid metabolism,hsa00350:Tyrosine metabolism,hsa00830:Retinol metabolism,hsa00980:Metabolism of xenobiotics by cytochrome P450,hsa00982:Drug metabolism,		10975466,11095947,12050823,12477932,14702039,15489334,1593644,16685648,17185388,1755855,1881901,19343046,2198032,7695785,
131	adh7,	alcohol dehydrogenase 7 (class IV), mu or sigma polypeptide	1.1.1.1,		alcohol dependence,atherosclerosis, coronary blood pressure, arterial cholesterol, HDL,drug dependence,multiple system atrophy,triglycerides; blood pressure, arterial; antioxidant activity,		GO:0004022~alcohol dehydrogenase (NAD) activity,GO:0004024~alcohol dehydrogenase activity, zinc-dependent,GO:0004031~aldehyde oxidase activity,GO:0004745~retinol dehydrogenase activity,GO:0005501~retinoid binding,GO:0008270~zinc ion binding,GO:0008289~lipid binding,GO:0016623~oxidoreductase activity, acting on the aldehyde or oxo group of donors, oxygen as acceptor,GO:0019840~isoprenoid binding,G…	hsa00010:Glycolysis / Gluconeogenesis,hsa00071:Fatty acid metabolism,hsa00350:Tyrosine metabolism,hsa00830:Retinol metabolism,hsa00980:Metabolism of xenobiotics by cytochrome P450,hsa00982:Drug metabolism,		10631979,11997393,14502680,15456134,15489334,15815621,1592118,16180008,16685648,17185388,17486761,17918242,17921519,18231859,18331377,18500343,19193628,19343046,7771649,7876099,7876191,7925371,8074657,8082805,8125298,8195208,8824810,9228021,9373149,9600267,
216	aldh1a1,	aldehyde dehydrogenase 1 family, member A1	1.2.1.36,		alcohol abuse,alcohol abuse; smoking behavior,alcoholism,cyclophosphamide pharmacokinetics,		GO:0001758~retinal dehydrogenase activity,GO:0004029~aldehyde dehydrogenase (NAD) activity,GO:0005083~small GTPase regulator activity,GO:0005096~GTPase activator activity,GO:0005099~Ras GTPase activator activity,GO:0005496~steroid binding,GO:0005497~androgen binding,GO:0008047~enzyme activator activity,GO:0008289~lipid binding,GO:0016620~oxidoreductase activity, acting on the aldehyde or oxo grou…	hsa00830:Retinol metabolism,		12081471,12174908,12477932,14506398,14678778,15489334,15597079,16189514,16857736,16878979,1709013,17175089,17222227,17286337,17502835,17628022,18029348,18082256,18331377,18343808,18371393,18450747,18496131,18644979,18848913,18854779,19018242,19025616,19129088,19296407,19343046,224930,2591967,2776714,2987944,3013004,3397064,3676276,4015823,6427007,6723659,730161,8214422,8493914,9166904,9240474,972…
8854	ALDH1A2,	aldehyde dehydrogenase 1 family, member A2	1.2.1.36,		neural tube defects,		GO:0001758~retinal dehydrogenase activity,GO:0004028~3-chloroallyl aldehyde dehydrogenase activity,GO:0005501~retinoid binding,GO:0008289~lipid binding,GO:0016620~oxidoreductase activity, acting on the aldehyde or oxo group of donors, NAD or NADP as acceptor,GO:0016918~retinal binding,GO:0019840~isoprenoid binding,GO:0019842~vitamin binding,	hsa00830:Retinol metabolism,		10192400,11953746,12477932,14702039,14718574,15489334,16166285,16237707,16368932,17974005,18495959,19343046,8663198,8797830,9819382,
220	ALDH1A3,	aldehyde dehydrogenase 1 family, member A3	1.2.1.5,				GO:0004030~aldehyde dehydrogenase [NAD(P)+] activity,GO:0016620~oxidoreductase activity, acting on the aldehyde or oxo group of donors, NAD or NADP as acceptor,GO:0042802~identical protein binding,GO:0042803~protein homodimerization activity,GO:0046983~protein dimerization activity,	hsa00010:Glycolysis / Gluconeogenesis,hsa00340:Histidine metabolism,hsa00350:Tyrosine metabolism,hsa00360:Phenylalanine metabolism,hsa00980:Metabolism of xenobiotics by cytochrome P450,hsa00982:Drug metabolism,		11585737,12040753,12477932,15489334,19343046,7698756,9490025,
224	aldh3a2,	aldehyde dehydrogenase 3 family, member A2	1.2.1.3,	Sjogren-Larsson syndrome,	Sjogren-Larsson syndrome,		GO:0004028~3-chloroallyl aldehyde dehydrogenase activity,GO:0004029~aldehyde dehydrogenase (NAD) activity,GO:0004030~aldehyde dehydrogenase [NAD(P)+] activity,GO:0016620~oxidoreductase activity, acting on the aldehyde or oxo group of donors, NAD or NADP as acceptor,	hsa00010:Glycolysis / Gluconeogenesis,hsa00053:Ascorbate and aldarate metabolism,hsa00071:Fatty acid metabolism,hsa00280:Valine, leucine and isoleucine degradation,hsa00310:Lysine degradation,hsa00330:Arginine and proline metabolism,hsa00340:Histidine metabolism,hsa00380:Tryptophan metabolism,hsa00410:beta-Alanine metabolism,hsa00561:Glycerolipid metabolism,hsa00620:Pyruvate metabolism,hsa00640:P…		10577908,10792573,11408337,12477932,14702039,15110319,15241804,15489334,15931689,16794583,16996289,17510064,17902024,17971613,17998529,18035827,18519826,19343046,7485163,7894487,8528251,9027499,9070922,9204959,9250352,9254849,9467812,9829906,
221	Aldh3b1,	aldehyde dehydrogenase 3 family, member B1	1.2.1.5,		schizophrenia,		GO:0004028~3-chloroallyl aldehyde dehydrogenase activity,GO:0004030~aldehyde dehydrogenase [NAD(P)+] activity,GO:0016620~oxidoreductase activity, acting on the aldehyde or oxo group of donors, NAD or NADP as acceptor,	hsa00010:Glycolysis / Gluconeogenesis,hsa00340:Histidine metabolism,hsa00350:Tyrosine metabolism,hsa00360:Phenylalanine metabolism,hsa00980:Metabolism of xenobiotics by cytochrome P450,hsa00982:Drug metabolism,		12477932,14702039,15489334,16092759,17382292,18187866,19159868,19343046,7828891,9161417,9490025,
222	ALDH3B2,	aldehyde dehydrogenase 3 family, member B2	1.2.1.5,				GO:0004028~3-chloroallyl aldehyde dehydrogenase activity,GO:0004030~aldehyde dehydrogenase [NAD(P)+] activity,GO:0016620~oxidoreductase activity, acting on the aldehyde or oxo group of donors, NAD or NADP as acceptor,	hsa00010:Glycolysis / Gluconeogenesis,hsa00340:Histidine metabolism,hsa00350:Tyrosine metabolism,hsa00360:Phenylalanine metabolism,hsa00980:Metabolism of xenobiotics by cytochrome P450,hsa00982:Drug metabolism,		10737800,12477932,14702039,15342556,15489334,19343046,7484374,8890755,9161417,
218	ALDH3A1,	aldehyde dehydrogenase 3 family, memberA1	1.2.1.5,		Posttransplantation diabetes mellitus (PTDM),schizophrenia,		GO:0004028~3-chloroallyl aldehyde dehydrogenase activity,GO:0004029~aldehyde dehydrogenase (NAD) activity,GO:0004030~aldehyde dehydrogenase [NAD(P)+] activity,GO:0004033~aldo-keto reductase activity,GO:0008106~alcohol dehydrogenase (NADP+) activity,GO:0016620~oxidoreductase activity, acting on the aldehyde or oxo group of donors, NAD or NADP as acceptor,	hsa00010:Glycolysis / Gluconeogenesis,hsa00340:Histidine metabolism,hsa00350:Tyrosine metabolism,hsa00360:Phenylalanine metabolism,hsa00980:Metabolism of xenobiotics by cytochrome P450,hsa00982:Drug metabolism,		10780262,11256614,12081471,12367788,12477932,12706498,12943535,1306115,14702039,14745454,15489334,15905174,16344560,16625196,1737758,18496131,18536178,18621017,18854779,19025616,1905102,19058789,19343046,19360691,2037078,4073832,7228061,7625577,7774944,8125298,8493892,8889548,9027499,9250352,9373149,9514081,9855707,
4329	Aldh6a1,	aldehyde dehydrogenase 6 family, member A1	1.2.1.18,1.2.1.27,	Methylmalonate semialdehyde dehydrogenase deficiency,			GO:0000062~acyl-CoA binding,GO:0004491~methylmalonate-semialdehyde dehydrogenase (acylating) activity,GO:0005504~fatty acid binding,GO:0008289~lipid binding,GO:0016620~oxidoreductase activity, acting on the aldehyde or oxo group of donors, NAD or NADP as acceptor,GO:0016790~thiolester hydrolase activity,GO:0018478~malonate-semialdehyde dehydrogenase (acetylating) activity,GO:0031406~carboxylic ac…	hsa00280:Valine, leucine and isoleucine degradation,hsa00562:Inositol phosphate metabolism,hsa00640:Propanoate metabolism,		10947204,12477932,14718574,1527093,15489334,15909363,19343046,8125298,9373149,
501	ALDH7A1,	aldehyde dehydrogenase 7 family, member A1	1.2.1.31,	Epilepsy, pyridoxine-dependent,			GO:0004029~aldehyde dehydrogenase (NAD) activity,GO:0004043~L-aminoadipate-semialdehyde dehydrogenase activity,GO:0016620~oxidoreductase activity, acting on the aldehyde or oxo group of donors, NAD or NADP as acceptor,	hsa00010:Glycolysis / Gluconeogenesis,hsa00053:Ascorbate and aldarate metabolism,hsa00071:Fatty acid metabolism,hsa00280:Valine, leucine and isoleucine degradation,hsa00310:Lysine degradation,hsa00330:Arginine and proline metabolism,hsa00340:Histidine metabolism,hsa00380:Tryptophan metabolism,hsa00410:beta-Alanine metabolism,hsa00561:Glycerolipid metabolism,hsa00620:Pyruvate metabolism,hsa00640:P…		10978228,12477932,12766061,14702039,15489334,16159904,16344560,16491085,17068770,17088338,17433748,17721876,18717709,18854520,19294602,8088832,9417906,
223	ALDH9A1,	aldehyde dehydrogenase 9 family, member A1	1.2.1.19,1.2.1.3,1.2.1.47,				GO:0004029~aldehyde dehydrogenase (NAD) activity,GO:0016620~oxidoreductase activity, acting on the aldehyde or oxo group of donors, NAD or NADP as acceptor,GO:0019145~aminobutyraldehyde dehydrogenase activity,GO:0047105~4-trimethylammoniobutyraldehyde dehydrogenase activity,	hsa00010:Glycolysis / Gluconeogenesis,hsa00053:Ascorbate and aldarate metabolism,hsa00071:Fatty acid metabolism,hsa00280:Valine, leucine and isoleucine degradation,hsa00310:Lysine degradation,hsa00330:Arginine and proline metabolism,hsa00340:Histidine metabolism,hsa00380:Tryptophan metabolism,hsa00410:beta-Alanine metabolism,hsa00561:Glycerolipid metabolism,hsa00620:Pyruvate metabolism,hsa00640:P…		10702312,11790142,12477932,14702039,15489334,16710414,18029348,18334916,19064610,19343046,2925663,8112751,8269919,8645224,8786138,9417993,
1374	Cpt1a,	carnitine palmitoyltransferase 1A (liver)	2.3.1.21,	CPT deficiency, hepatic, type IA,	diabetes, type 2 hepatic lipid content insulin,hepatitis C, chronic,left ventricular hypertrophy,obesity,	env:Envelope surface glycoprotein gp160, precursor,	GO:0004095~carnitine O-palmitoyltransferase activity,GO:0008374~O-acyltransferase activity,GO:0016406~carnitine O-acyltransferase activity,GO:0016409~palmitoyltransferase activity,GO:0016416~O-palmitoyltransferase activity,	hsa00071:Fatty acid metabolism,hsa03320:PPAR signaling pathway,hsa04920:Adipocytokine signaling pathway,	11095714,	10408760,11001805,11095714,11350182,11441142,12111367,12189492,12464674,12477932,14517221,14711372,15110323,15489334,15647998,15669684,15846373,16246309,16271724,16344560,16697732,16806233,17089095,17445541,17452323,18253084,18385088,18996102,19181627,19217814,7892212,9070836,9070950,9691089,
126129	Cpt1c,	carnitine palmitoyltransferase 1C	2.3.1.21,			env:Envelope surface glycoprotein gp160, precursor,	GO:0004095~carnitine O-palmitoyltransferase activity,GO:0008374~O-acyltransferase activity,GO:0016406~carnitine O-acyltransferase activity,GO:0016409~palmitoyltransferase activity,GO:0016416~O-palmitoyltransferase activity,	hsa00071:Fatty acid metabolism,hsa03320:PPAR signaling pathway,hsa04920:Adipocytokine signaling pathway,	11095714,	11001805,11095714,12376098,12477932,14702039,15489334,17974005,18192268,18385088,
1376	cpt2,	carnitine palmitoyltransferase 2	2.3.1.21,	CPT deficiency, hepatic, type II,CPT II deficiency, lethal neonatal,Myopathy due to CPT II deficiency,	left ventricular hypertrophy,myopathy, drug-induced,variable myopathy,	env:Envelope surface glycoprotein gp160, precursor,	GO:0004095~carnitine O-palmitoyltransferase activity,GO:0008374~O-acyltransferase activity,GO:0016406~carnitine O-acyltransferase activity,GO:0016409~palmitoyltransferase activity,GO:0016416~O-palmitoyltransferase activity,	hsa00071:Fatty acid metabolism,hsa03320:PPAR signaling pathway,	11095714,	10090476,10607472,11001805,11095714,11257506,11477613,11855939,11994355,12408750,12410208,12477932,12707442,12971426,1339389,14605500,14615409,1528846,15489334,15622536,15642848,15647998,15754283,16054041,16168441,16670153,16671104,16710414,16996287,17179390,17651973,17709715,17936304,18024217,18306170,18363739,18550408,18645163,18996102,1961767,1988962,2174799,7711730,7892212,7896283,8086471,812…
1375	CHKB,Cpt1b,	choline kinase beta; carnitine palmitoyltransferase 1B (muscle)	2.3.1.21,2.7.1.32,2.7.1.82,	A genome-wide association study for late-onset Alzheimer's disease using DNA pooling,Variant between CPT1B and CHKB associated with susceptibility to narcolepsy,	left ventricular hypertrophy,obesity,	env:Envelope surface glycoprotein gp160, precursor,	GO:0000166~nucleotide binding,GO:0001882~nucleoside binding,GO:0001883~purine nucleoside binding,GO:0004095~carnitine O-palmitoyltransferase activity,GO:0004103~choline kinase activity,GO:0004305~ethanolamine kinase activity,GO:0005524~ATP binding,GO:0008374~O-acyltransferase activity,GO:0016406~carnitine O-acyltransferase activity,GO:0016409~palmitoyltransferase activity,GO:0016416~O-palmitoyltr…	hsa00071:Fatty acid metabolism,hsa00564:Glycerophospholipid metabolism,hsa03320:PPAR signaling pathway,hsa04920:Adipocytokine signaling pathway,	11095714,	10408760,10493829,10591208,10706593,10918069,11001805,11095714,11257506,11258795,12015320,12477932,12565845,14702039,15003397,15356291,15461802,15489334,15579906,15647998,16054041,17089095,17924679,17987377,18660489,18820697,18823527,18996102,19074885,19404393,8125298,8679700,9070950,9199240,9224698,9344464,9370318,9373149,9487136,
56994	CHPT1,	choline phosphotransferase 1	2.7.8.2,				GO:0000287~magnesium ion binding,GO:0004142~diacylglycerol cholinephosphotransferase activity,GO:0008289~lipid binding,GO:0016780~phosphotransferase activity, for other substituted phosphate groups,GO:0017169~CDP-alcohol phosphatidyltransferase activity,GO:0019992~diacylglycerol binding,GO:0030145~manganese ion binding,GO:0043167~ion binding,GO:0043169~cation binding,GO:0046872~metal ion binding,…	hsa00564:Glycerophospholipid metabolism,hsa00565:Ether lipid metabolism,		10893425,12221122,12359261,12477932,14702039,15489334,15936720,16292752,16303743,
10390	CEPT1,	choline/ethanolamine phosphotransferase 1	2.7.8.1,2.7.8.2,				GO:0000287~magnesium ion binding,GO:0004142~diacylglycerol cholinephosphotransferase activity,GO:0004307~ethanolaminephosphotransferase activity,GO:0016780~phosphotransferase activity, for other substituted phosphate groups,GO:0017169~CDP-alcohol phosphatidyltransferase activity,GO:0030145~manganese ion binding,GO:0043167~ion binding,GO:0043169~cation binding,GO:0046872~metal ion binding,GO:00469…			10191259,10893425,12216837,12221122,12477932,14702039,15489334,16710414,17974005,18691976,
51727	CMPK1,	cytidine monophosphate (UMP-CMP) kinase 1, cytosolic	2.7.4.14,				GO:0000166~nucleotide binding,GO:0001882~nucleoside binding,GO:0001883~purine nucleoside binding,GO:0004127~cytidylate kinase activity,GO:0004849~uridine kinase activity,GO:0005524~ATP binding,GO:0016776~phosphotransferase activity, phosphate group as acceptor,GO:0017076~purine nucleotide binding,GO:0019201~nucleotide kinase activity,GO:0019205~nucleobase, nucleoside, nucleotide kinase activity,G…	hsa00240:Pyrimidine metabolism,		10462544,10931946,11681623,11912132,12477932,12694191,1286669,15163660,15489334,15550676,15606899,16710414,17608725,8125298,8313870,9373149,
8560	DEGS1,	degenerative spermatocyte homolog 1, lipid desaturase (Drosophila)	1.14.-.-,				GO:0009055~electron carrier activity,	hsa00600:Sphingolipid metabolism,		11937514,12477932,15489334,17283068,17353931,18669648,9188692,
1737	dlaT,	dihydrolipoamide S-acetyltransferase	2.3.1.12,	Pyruvate dehydrogenase E2 deficiency,			GO:0004742~dihydrolipoyllysine-residue acetyltransferase activity,GO:0016407~acetyltransferase activity,GO:0016417~S-acyltransferase activity,GO:0016418~S-acetyltransferase activity,GO:0030523~dihydrolipoamide S-acyltransferase activity,GO:0031405~lipoic acid binding,GO:0031406~carboxylic acid binding,GO:0048037~cofactor binding,GO:0050662~coenzyme binding,	hsa00010:Glycolysis / Gluconeogenesis,hsa00020:Citrate cycle (TCA cycle),hsa00620:Pyruvate metabolism,		11978179,12395322,12477932,12816949,14638692,14702039,15120760,15489334,15861126,16049940,16554811,17068145,17532006,17683942,18184588,18206651,18387944,19185000,19240061,2317220,3036145,3174635,3191998,8102256,8125298,9373149,9649469,
953	ENTPD1,	ectonucleoside triphosphate diphosphohydrolase 1	3.6.1.5,				GO:0000166~nucleotide binding,GO:0000287~magnesium ion binding,GO:0001882~nucleoside binding,GO:0001883~purine nucleoside binding,GO:0005509~calcium ion binding,GO:0005524~ATP binding,GO:0017076~purine nucleotide binding,GO:0017110~nucleoside-diphosphatase activity,GO:0030554~adenyl nucleotide binding,GO:0032553~ribonucleotide binding,GO:0032555~purine ribonucleotide binding,GO:0032559~adenyl rib…	hsa00230:Purine metabolism,hsa00240:Pyrimidine metabolism,		10405171,10471369,10636909,10737800,10997340,11004484,11897808,12067895,12234494,12477932,12482826,12623446,12832497,14702039,15146241,15164054,15489334,15496502,15590415,15772061,15890655,16011960,16028070,16478441,16920697,17053785,17374358,17449799,17560607,17727821,18485080,18600538,18713747,18812468,18979366,19095759,19159218,7930580,8529670,8626624,8955160,8996251,9226376,9846014,
954	ENTPD2,	ectonucleoside triphosphate diphosphohydrolase 2	3.6.1.-,				GO:0000287~magnesium ion binding,GO:0005509~calcium ion binding,GO:0017110~nucleoside-diphosphatase activity,GO:0043167~ion binding,GO:0043169~cation binding,GO:0046872~metal ion binding,	hsa00230:Purine metabolism,		10510450,11591653,11827541,12477932,12888562,14522593,15489334,15496502,15651265,15799977,16101300,17489562,18656957,9271669,
956	entpd3,	ectonucleoside triphosphate diphosphohydrolase 3	3.6.1.5,				GO:0000166~nucleotide binding,GO:0000287~magnesium ion binding,GO:0001882~nucleoside binding,GO:0001883~purine nucleoside binding,GO:0005509~calcium ion binding,GO:0005524~ATP binding,GO:0017076~purine nucleotide binding,GO:0017110~nucleoside-diphosphatase activity,GO:0030554~adenyl nucleotide binding,GO:0032553~ribonucleotide binding,GO:0032555~purine ribonucleotide binding,GO:0032559~adenyl rib…	hsa00230:Purine metabolism,hsa00240:Pyrimidine metabolism,		10231536,11300774,12477932,15489334,15966724,17727821,19120451,9271669,9675246,9676430,
957	Entpd5,	ectonucleoside triphosphate diphosphohydrolase 5	3.6.1.6,				GO:0000287~magnesium ion binding,GO:0005509~calcium ion binding,GO:0017110~nucleoside-diphosphatase activity,GO:0043167~ion binding,GO:0043169~cation binding,GO:0046872~metal ion binding,	hsa00230:Purine metabolism,hsa00240:Pyrimidine metabolism,		10400613,10708485,11041857,11181995,12477932,12489110,15489334,15698960,16335952,16344560,16465363,18006831,18029348,19117992,19159218,9271669,9676430,
955	entpd6,	ectonucleoside triphosphate diphosphohydrolase 6 (putative function)	3.6.1.6,				GO:0000287~magnesium ion binding,GO:0005509~calcium ion binding,GO:0008894~guanosine-5'-triphosphate,3'-diphosphate diphosphatase activity,GO:0017110~nucleoside-diphosphatase activity,GO:0043167~ion binding,GO:0043169~cation binding,GO:0046872~metal ion binding,	hsa00230:Purine metabolism,hsa00240:Pyrimidine metabolism,		10948193,11041856,11076863,11230166,11780052,12477932,14529283,14702039,15489334,15489336,16303743,16381901,16713569,9271669,9676430,
1962	EHHADH,	enoyl-Coenzyme A, hydratase/3-hydroxyacyl Coenzyme A dehydrogenase	1.1.1.35,4.2.1.17,5.3.3.8,				GO:0003857~3-hydroxyacyl-CoA dehydrogenase activity,GO:0004165~dodecenoyl-CoA delta-isomerase activity,GO:0004300~enoyl-CoA hydratase activity,GO:0016836~hydro-lyase activity,GO:0016860~intramolecular oxidoreductase activity,GO:0016863~intramolecular oxidoreductase activity, transposing C=C bonds,GO:0048037~cofactor binding,GO:0050662~coenzyme binding,	hsa00071:Fatty acid metabolism,hsa00280:Valine, leucine and isoleucine degradation,hsa00310:Lysine degradation,hsa00380:Tryptophan metabolism,hsa00410:beta-Alanine metabolism,hsa00640:Propanoate metabolism,hsa00650:Butanoate metabolism,hsa00903:Limonene and pinene degradation,hsa03320:PPAR signaling pathway,		11451959,12477932,15489334,1651711,17287340,18660489,19240061,8125298,8188243,9185222,9373149,
9415	FADS2,	fatty acid desaturase 2	1.14.19.-,1.14.19.3,	Common variants at 30 loci contribute to polygenic dyslipidemia,Genome-wide association analysis of metabolic traits in a birth cohort from a founder population,Loci influencing lipid levels and coronary heart disease risk in 16 European population cohorts,	allergic rhinitis dermatitis and eczema fatty acid,attention deficit hyperactivity disorder,myocardial infarct,		GO:0004768~stearoyl-CoA 9-desaturase activity,GO:0005506~iron ion binding,GO:0016717~oxidoreductase activity, acting on paired donors, with oxidation of a pair of donors resulting in the reduction of molecular oxygen to two molecules of water,GO:0020037~heme binding,GO:0043167~ion binding,GO:0043169~cation binding,GO:0046872~metal ion binding,GO:0046906~tetrapyrrole binding,GO:0046914~transition …	hsa00592:alpha-Linolenic acid metabolism,hsa01040:Biosynthesis of unsaturated fatty acids,hsa03320:PPAR signaling pathway,		10860662,12147235,12477932,12562861,12713571,12851727,12951357,14702039,15489334,16303743,16670158,16893529,16908951,17284757,17852835,17974005,17984066,18320251,18479586,18626191,18842780,18936223,18937842,19060906,19060910,19060911,19144731,19148276,19352218,9445487,9867867,
2194	FASN,	fatty acid synthase	1.1.1.100,1.3.1.10,2.3.1.38,2.3.1.39,2.3.1.41,2.3.1.85,3.1.2.14,4.2.1.61,				GO:0000036~acyl carrier activity,GO:0004312~fatty-acid synthase activity,GO:0004313~[acyl-carrier-protein] S-acetyltransferase activity,GO:0004314~[acyl-carrier-protein] S-malonyltransferase activity,GO:0004315~3-oxoacyl-[acyl-carrier-protein] synthase activity,GO:0004316~3-oxoacyl-[acyl-carrier-protein] reductase activity,GO:0004317~3-hydroxypalmitoyl-[acyl-carrier-protein] dehydratase activity,…	hsa00061:Fatty acid biosynthesis,hsa04910:Insulin signaling pathway,		1044453,10769045,11018265,11034606,11248039,11756679,11790787,12060737,12213084,12477932,12515624,12531699,12646257,12815048,12839976,12882974,12939396,14689581,15047835,15113941,15220220,15235125,15254710,15302935,15489334,15507492,15523670,15669079,15897909,16175090,16215233,16582625,16625196,16644689,16806233,16894240,16964243,17081065,17081983,17188392,17220478,17492427,17618104,17618296,1763…
92579	G6pc3,	glucose 6 phosphatase, catalytic, 3	3.1.3.9,	Neutropenia, severe congenital, autosomal recessive 4,			GO:0004346~glucose-6-phosphatase activity,GO:0016791~phosphatase activity,GO:0019203~carbohydrate phosphatase activity,			12370122,12477932,12965222,13129915,14718531,14765991,15489334,19118303,
2538	G6PC,	glucose-6-phosphatase, catalytic subunit	3.1.3.9,	Glycogen storage disease I,	glycogen storage disease,SIDS/sudden infant death syndrome,		GO:0004346~glucose-6-phosphatase activity,GO:0016791~phosphatase activity,GO:0019203~carbohydrate phosphatase activity,GO:0042301~phosphate binding,GO:0043167~ion binding,GO:0043168~anion binding,	hsa00010:Glycolysis / Gluconeogenesis,hsa00052:Galactose metabolism,hsa00500:Starch and sucrose metabolism,hsa04910:Insulin signaling pathway,hsa04920:Adipocytokine signaling pathway,		10023055,10024523,10026167,10070617,10094563,10318794,10447271,10452914,10612834,10738005,10748407,10874313,10960498,11058903,11058910,11672436,11739393,12093795,12189168,12373566,12444104,12477932,12556524,12560945,13129915,14702039,14718531,14759518,15316959,15489334,15542400,15661744,15696478,15918042,16892178,16893891,16959974,17354259,175958,18008183,18449899,18660489,18805788,18847435,19082…
57818	G6PC2,	glucose-6-phosphatase, catalytic, 2	3.1.3.9,	A Polymorphism Within the G6PC2 Gene is Associated with Fasting Plasma Glucose Levels,Fasting plasma glucose level QTL 1,Genome-wide association analysis of metabolic traits in a birth cohort from a founder population,Variations in the G6PC2/ABCB11 genomic region are associated with fasting glucose levels,			GO:0004346~glucose-6-phosphatase activity,GO:0016791~phosphatase activity,GO:0019203~carbohydrate phosphatase activity,	hsa00010:Glycolysis / Gluconeogenesis,hsa00052:Galactose metabolism,hsa00500:Starch and sucrose metabolism,hsa04910:Insulin signaling pathway,hsa04920:Adipocytokine signaling pathway,		10078553,10078554,11297555,12477932,12815107,14722102,15044018,15489334,16012821,16493034,16520917,17376840,17607665,17974005,18451265,18521185,18753309,18984742,19060907,19060910,19082990,19096518,19125775,19238352,
2746	glud1,	glutamate dehydrogenase 1	1.4.1.3,	Hyperinsulinism-hyperammonemia syndrome,			GO:0000166~nucleotide binding,GO:0001882~nucleoside binding,GO:0001883~purine nucleoside binding,GO:0004352~glutamate dehydrogenase activity,GO:0004353~glutamate dehydrogenase [NAD(P)+] activity,GO:0005524~ATP binding,GO:0005525~GTP binding,GO:0016597~amino acid binding,GO:0016638~oxidoreductase activity, acting on the CH-NH2 group of donors,GO:0016639~oxidoreductase activity, acting on the CH-NH…	hsa00250:Alanine, aspartate and glutamate metabolism,hsa00330:Arginine and proline metabolism,hsa00471:D-Glutamine and D-glutamate metabolism,hsa00910:Nitrogen metabolism,		10338089,10636977,11214910,11254391,11297618,11840195,11872671,11903050,11950837,12022886,12054821,12193607,12324473,12477932,12653548,1286669,14702039,14743216,14760703,15044002,15164054,15273247,15378063,15489334,15578726,15609325,15750346,16151898,16492972,18321734,18688271,19046183,19046187,19156168,2757358,3368458,3377777,3399399,3426581,3585334,3997814,429360,6121377,8125298,8244384,8314555…
2747	GLUD2,	glutamate dehydrogenase 2	1.4.1.3,				GO:0000166~nucleotide binding,GO:0001882~nucleoside binding,GO:0001883~purine nucleoside binding,GO:0004352~glutamate dehydrogenase activity,GO:0004353~glutamate dehydrogenase [NAD(P)+] activity,GO:0005525~GTP binding,GO:0016597~amino acid binding,GO:0016638~oxidoreductase activity, acting on the CH-NH2 group of donors,GO:0016639~oxidoreductase activity, acting on the CH-NH2 group of donors, NAD …	hsa00250:Alanine, aspartate and glutamate metabolism,hsa00330:Arginine and proline metabolism,hsa00471:D-Glutamine and D-glutamate metabolism,hsa00910:Nitrogen metabolism,		11950837,11999891,12054821,12477932,14702039,15044002,15378063,15489334,15578726,15750346,15772651,15952740,16169070,17924438,18688271,19156168,2365355,8207021,8288265,8486350,9109504,9674910,
2879	GPX4,	glutathione peroxidase 4 (phospholipid hydroperoxidase)	1.11.1.12,		breast cancer,diabetes, type 2; liver disease,infertility, male,	tat:Tat,	GO:0004601~peroxidase activity,GO:0004602~glutathione peroxidase activity,GO:0008430~selenium binding,GO:0016209~antioxidant activity,GO:0016684~oxidoreductase activity, acting on peroxide as acceptor,GO:0042277~peptide binding,GO:0043295~glutathione binding,GO:0047066~phospholipid-hydroperoxide glutathione peroxidase activity,	hsa00480:Glutathione metabolism,hsa00590:Arachidonic acid metabolism,	10652368,11368344,15910762,9501919,	10464096,10652368,11368344,12152199,12193409,12427732,12477932,12490284,12606444,12732844,12868489,12958179,14642406,15057824,15149466,15225122,15256721,15308634,15474074,15489334,15910762,15978628,16341674,16424062,16868544,16872467,16979635,17020817,17052796,17516241,17601350,17630701,17634480,18400727,18483336,18636124,18676680,18977241,19124506,19161995,19285650,8039723,8125298,8287691,888954…
2936	gsr,	glutathione reductase	1.8.1.7,	Hemolytic anemia due to glutathione reductase deficiency,	breast cancer,sickle cell and thalassaemia genes,		GO:0000166~nucleotide binding,GO:0001882~nucleoside binding,GO:0001883~purine nucleoside binding,GO:0004362~glutathione-disulfide reductase activity,GO:0009055~electron carrier activity,GO:0015036~disulfide oxidoreductase activity,GO:0015037~peptide disulfide oxidoreductase activity,GO:0015038~glutathione disulfide oxidoreductase activity,GO:0016209~antioxidant activity,GO:0016651~oxidoreductase …	hsa00480:Glutathione metabolism,		10708558,11204445,11273669,11705998,11710935,12095224,12447480,12477932,12516882,12533953,12630007,12826156,12838767,12838770,12901426,14637279,15149466,15489334,15592455,15978628,16169070,16421571,16424062,16493712,16868544,16910673,17206382,17601350,18341267,18638483,18977241,19124506,19377255,2185014,2306116,2379581,2585516,302667,3338461,3656429,4043983,6822532,7060551,7060551],7334521,766397…
8833	GMPS,	guanine monphosphate synthetase	6.3.5.2,	Leukemia, acute myelogenous,			GO:0000166~nucleotide binding,GO:0001882~nucleoside binding,GO:0001883~purine nucleoside binding,GO:0003921~GMP synthase activity,GO:0003922~GMP synthase (glutamine-hydrolyzing) activity,GO:0005524~ATP binding,GO:0016879~ligase activity, forming carbon-nitrogen bonds,GO:0016884~carbon-nitrogen ligase activity, with glutamine as amido-N-donor,GO:0017076~purine nucleotide binding,GO:0019899~enzyme …	hsa00230:Purine metabolism,hsa00983:Drug metabolism,		11110714,12477932,15489334,16236267,17924679,18187866,6698284,7559506,7706277,8089153,8125298,9195163,9373149,
2766	gmpr,	guanosine monophosphate reductase	1.7.1.7,				GO:0003920~GMP reductase activity,GO:0016651~oxidoreductase activity, acting on NADH or NADPH,GO:0016657~oxidoreductase activity, acting on NADH or NADPH, nitrogenous group as acceptor,GO:0030955~potassium ion binding,GO:0031420~alkali metal ion binding,GO:0043167~ion binding,GO:0043169~cation binding,GO:0046872~metal ion binding,	hsa00230:Purine metabolism,		12009299,12477932,14574404,15489334,1661705,1694726,1757097,2194676,2364435,2570640,2758468,8188226,8750194,9813009,
51292	GMPR2,	guanosine monophosphate reductase 2	1.7.1.7,				GO:0003920~GMP reductase activity,GO:0016651~oxidoreductase activity, acting on NADH or NADPH,GO:0016657~oxidoreductase activity, acting on NADH or NADPH, nitrogenous group as acceptor,GO:0030955~potassium ion binding,GO:0031420~alkali metal ion binding,GO:0043167~ion binding,GO:0043169~cation binding,GO:0046872~metal ion binding,	hsa00230:Purine metabolism,		10737800,11752456,12009299,12477932,12669231,15489334,16359702,
3032	hadhb,	hydroxyacyl-Coenzyme A dehydrogenase/3-ketoacyl-Coenzyme A thiolase/enoyl-Coenzyme A hydratase (trifunctional protein), beta subunit	2.3.1.16,	Trifunctional protein deficiency,Trifunctional protein deficiency, type II,			GO:0000062~acyl-CoA binding,GO:0000166~nucleotide binding,GO:0003857~3-hydroxyacyl-CoA dehydrogenase activity,GO:0003988~acetyl-CoA C-acyltransferase activity,GO:0004300~enoyl-CoA hydratase activity,GO:0005504~fatty acid binding,GO:0008289~lipid binding,GO:0016408~C-acyltransferase activity,GO:0016508~long-chain-enoyl-CoA hydratase activity,GO:0016509~long-chain-3-hydroxyacyl-CoA dehydrogenase ac…	hsa00062:Fatty acid elongation in mitochondria,hsa00071:Fatty acid metabolism,hsa00280:Valine, leucine and isoleucine degradation,		12477932,12665801,12721663,12754706,12933794,14630990,14702039,15242332,15489334,1550553,15815621,16344560,16959974,17199921,18063578,7958339,8135828,8163672,8651282,8921383,9259266,9605857,9739053,
10449	ACAA2,LOC648603,	hypothetical LOC648603; acetyl-Coenzyme A acyltransferase 2	2.3.1.16,	Six new loci associated with blood low-density lipoprotein cholesterol, high-density lipoprotein cholesterol or triglycerides in humans,			GO:0003988~acetyl-CoA C-acyltransferase activity,GO:0016408~C-acyltransferase activity,	hsa00062:Fatty acid elongation in mitochondria,hsa00071:Fatty acid metabolism,hsa00280:Valine, leucine and isoleucine degradation,		10856712,12477932,14702039,15242332,15489334,18193044,18371312,18669648,8125298,8241273,9373149,
3417	IDH1,	isocitrate dehydrogenase 1 (NADP+), soluble	1.1.1.42,				GO:0000166~nucleotide binding,GO:0000287~magnesium ion binding,GO:0004448~isocitrate dehydrogenase activity,GO:0004450~isocitrate dehydrogenase (NADP+) activity,GO:0030145~manganese ion binding,GO:0043167~ion binding,GO:0043169~cation binding,GO:0046872~metal ion binding,GO:0046914~transition metal ion binding,GO:0048037~cofactor binding,GO:0050661~NADP or NADPH binding,GO:0050662~coenzyme bindin…	hsa00020:Citrate cycle (TCA cycle),hsa00480:Glutathione metabolism,		10521434,11076863,11230166,11256614,12477932,12923220,15173171,15489334,15489336,15936593,16236267,16381901,16751257,16959974,18772396,18985363,19117336,19228619,19246647,19340432,19351817,19359588,19378339,19411854,3861566,4388365,4422176,7551812,9866202,
3418	IDH2,	isocitrate dehydrogenase 2 (NADP+), mitochondrial	1.1.1.42,				GO:0000166~nucleotide binding,GO:0000287~magnesium ion binding,GO:0004448~isocitrate dehydrogenase activity,GO:0004450~isocitrate dehydrogenase (NADP+) activity,GO:0030145~manganese ion binding,GO:0043167~ion binding,GO:0043169~cation binding,GO:0046872~metal ion binding,GO:0046914~transition metal ion binding,GO:0048037~cofactor binding,GO:0050662~coenzyme binding,GO:0051287~NAD or NADH binding,	hsa00020:Citrate cycle (TCA cycle),hsa00480:Glutathione metabolism,		11969,12477932,12665801,15489334,16396496,17854715,18096511,18484410,19228619,3363531,564083,752528,8125298,8707889,8954790,9373149,965003,970033,
4190	Mdh1,	malate dehydrogenase 1, NAD (soluble)	1.1.1.37,				GO:0000166~nucleotide binding,GO:0004470~malic enzyme activity,GO:0016615~malate dehydrogenase activity,GO:0030060~L-malate dehydrogenase activity,GO:0048037~cofactor binding,GO:0050662~coenzyme binding,GO:0051287~NAD or NADH binding,	hsa00020:Citrate cycle (TCA cycle),hsa00620:Pyruvate metabolism,hsa00630:Glyoxylate and dicarboxylate metabolism,		10075524,10190973,12477932,15489334,15565635,15815621,18996102,19110265,19229245,2449162,2775751,3052244,7151307,7698769,7895732,8786100,9799840,
130752	Mdh1b,	malate dehydrogenase 1B, NAD (soluble)	1.1.1.-,				GO:0016615~malate dehydrogenase activity,			12477932,14702039,15489334,15815621,
4200	ME2,	malic enzyme 2, NAD(+)-dependent, mitochondrial	1.1.1.38,	Epilepsy, idopathic generalized, susceptibility to,	epilepsy, idiopathic generalized,		GO:0000166~nucleotide binding,GO:0004470~malic enzyme activity,GO:0004471~malate dehydrogenase (decarboxylating) activity,GO:0009055~electron carrier activity,GO:0016615~malate dehydrogenase activity,GO:0016619~malate dehydrogenase (oxaloacetate-decarboxylating) activity,GO:0043167~ion binding,GO:0043169~cation binding,GO:0046872~metal ion binding,GO:0048037~cofactor binding,GO:0050662~coenzyme b…	hsa00620:Pyruvate metabolism,		10467136,10477256,10700286,10913357,11358520,11401430,12121650,12477932,12665801,12962632,14760703,15489334,15532013,16171388,16190936,16344560,17418816,17638511,19066393,1993674,3689803,511162,680703,7496989,7757881,
10797	mthfd2,	methylenetetrahydrofolate dehydrogenase (NADP+ dependent) 2, methenyltetrahydrofolate cyclohydrolase	1.5.1.15,3.5.4.9,				GO:0000287~magnesium ion binding,GO:0004477~methenyltetrahydrofolate cyclohydrolase activity,GO:0004486~methylenetetrahydrofolate dehydrogenase activity,GO:0004487~methylenetetrahydrofolate dehydrogenase (NAD+) activity,GO:0004488~methylenetetrahydrofolate dehydrogenase (NADP+) activity,GO:0016645~oxidoreductase activity, acting on the CH-NH group of donors,GO:0016646~oxidoreductase activity, act…	hsa00630:Glyoxylate and dicarboxylate metabolism,hsa00670:One carbon pool by folate,		12477932,15489334,15815621,16344560,18676680,18830263,19048631,19161160,2587219,8125298,8218174,8939898,9373149,9454603,
84693	MCEE,	methylmalonyl CoA epimerase	5.1.99.1,	Methylmalonyl-CoA epimerase deficiency,			GO:0004493~methylmalonyl-CoA epimerase activity,GO:0016854~racemase and epimerase activity,	hsa00280:Valine, leucine and isoleucine degradation,hsa00640:Propanoate metabolism,		11481338,12477932,15489334,16697227,16752391,16843692,17823972,
4860	pnp,	nucleoside phosphorylase	2.4.2.1,	Nucleoside phosphorylase deficiency, immunodeficiency due to,	Alzheimer's disease cognitive function,		GO:0001882~nucleoside binding,GO:0002054~nucleobase binding,GO:0002060~purine binding,GO:0004731~purine-nucleoside phosphorylase activity,GO:0008144~drug binding,GO:0016763~transferase activity, transferring pentosyl groups,GO:0042301~phosphate binding,GO:0043167~ion binding,GO:0043168~anion binding,	hsa00230:Purine metabolism,hsa00240:Pyrimidine metabolism,hsa00760:Nicotinate and nicotinamide metabolism,		100152,10884411,11453975,11964161,12068295,12180982,12477932,12914785,12914786,12928150,13679061,13679062,1384322,14680831,14702039,14706628,14982926,15047506,15489334,15571269,15582582,1560016,15983407,16154528,16169070,16930574,16964310,17221831,17407325,1763067,17639373,18281956,18281957,18790691,18938130,18946041,19001417,19191546,1923769,1931007,2104852,3029074,6087295,6771276,8931706,906775…
10935	prdx3,	peroxiredoxin 3	1.11.1.15,				GO:0004601~peroxidase activity,GO:0004857~enzyme inhibitor activity,GO:0004866~endopeptidase inhibitor activity,GO:0004869~cysteine-type endopeptidase inhibitor activity,GO:0008022~protein C-terminus binding,GO:0008785~alkyl hydroperoxide reductase activity,GO:0016209~antioxidant activity,GO:0016651~oxidoreductase activity, acting on NADH or NADPH,GO:0016667~oxidoreductase activity, acting on sul…			11285261,11591653,11771746,11904290,12011429,12059788,12080185,12477932,12492477,12530083,12650976,1286669,14702039,15164054,15280382,15489334,15750338,16189514,16236267,17060495,17548047,17574212,17601350,17893648,18195003,18205602,18262354,18378575,18977241,19135121,19176523,7733872,8125298,9363753,9373149,
9791	Ptdss1,	phosphatidylserine synthase 1	2.7.8.-,					hsa00564:Glycerophospholipid metabolism,		10938271,11084049,12477932,15489334,1748687,18220336,18669648,18691976,19014349,7584026,
5236	pgm1,	phosphoglucomutase 1	5.4.2.2,		atherosclerosis, coronary; tuberculosis,diabetes, type 1,tuberculosis,		GO:0000287~magnesium ion binding,GO:0004614~phosphoglucomutase activity,GO:0016866~intramolecular transferase activity,GO:0016868~intramolecular transferase activity, phosphotransferases,GO:0043167~ion binding,GO:0043169~cation binding,GO:0046872~metal ion binding,	hsa00010:Glycolysis / Gluconeogenesis,hsa00030:Pentose phosphate pathway,hsa00052:Galactose metabolism,hsa00500:Starch and sucrose metabolism,hsa00520:Amino sugar and nucleotide sugar metabolism,		10441333,11771313,11785295,11963573,12477932,12608294,12942785,1530890,15378030,15489334,15522220,1602151,16710414,17924679,18091362,18187866,18495743,18669648,3159642,4517931,621091,7902567,7902568,8257433,8586438,8631316,8894274,
5338	PLD2,	phospholipase D2	3.1.4.4,		colorectal cancer,		GO:0004620~phospholipase activity,GO:0004630~phospholipase D activity,GO:0005543~phospholipid binding,GO:0008081~phosphoric diester hydrolase activity,GO:0008289~lipid binding,GO:0016298~lipase activity,GO:0035091~phosphoinositide binding,GO:0070290~NAPE-specific phospholipase D activity,	hsa00564:Glycerophospholipid metabolism,hsa00565:Ether lipid metabolism,hsa04144:Endocytosis,hsa04666:Fc gamma R-mediated phagocytosis,hsa04912:GnRH signaling pathway,		10675563,10764771,10801846,10926929,11018470,11032811,11042115,11076863,11373276,11672434,11687572,11741937,11744693,11876650,12149127,12374567,12429836,12446727,12477932,12486109,12519790,12601529,12615079,12646582,12697812,12753082,12782287,14675200,14704231,14718562,14744865,15052337,15052340,15210717,15265082,15282299,15489334,15489336,15548524,15665518,15798205,15919668,16118212,16341931,163…
5092	Pcbd1,	pterin-4 alpha-carbinolamine dehydratase/dimerization cofactor of hepatocyte nuclear factor 1 alpha	4.2.1.96,	Hyperphenylalaninemia due to pterin-4a-carbinolamine dehydratase deficiency,Hyperphenylalaninemia, BH4-deficient, D,	diabetes, type 2; beta-cell function,		GO:0003712~transcription cofactor activity,GO:0003713~transcription coactivator activity,GO:0004505~phenylalanine 4-monooxygenase activity,GO:0008124~4-alpha-hydroxytetrahydrobiopterin dehydratase activity,GO:0008134~transcription factor binding,GO:0016563~transcription activator activity,GO:0016714~oxidoreductase activity, acting on paired donors, with incorporation or reduction of molecular oxy…			10098606,10727395,11461190,11668623,11937441,11980910,12477932,12565907,15489334,15740590,16189514,16423549,17353931,1763325,7725101,7763270,8188266,8352282,8444860,8444860],8486378,8504250,8618906,8682201,8889548,8897596,9092652,9391049,9585615,9760199,
5831	Pycr1,	pyrroline-5-carboxylate reductase 1	1.5.1.2,				GO:0004735~pyrroline-5-carboxylate reductase activity,GO:0016645~oxidoreductase activity, acting on the CH-NH group of donors,GO:0016646~oxidoreductase activity, acting on the CH-NH group of donors, NAD or NADP as acceptor,	hsa00330:Arginine and proline metabolism,		11181995,12477932,15489334,16525639,16618798,16625196,16730026,17003781,1730675,19174463,212173,2722838,6201483,6253048,6894153,8125298,8880459,9373149,
5860	QDPR,	quinoid dihydropteridine reductase	1.5.1.34,	Hyperphenylalaninemia due to dihydropteridine reductase deficiency,Hyperphenylalaninemia, BH4-deficient, C,Phenylketonuria due to dihydropteridine reductase deficiency,			GO:0004155~6,7-dihydropteridine reductase activity,GO:0009055~electron carrier activity,GO:0016645~oxidoreductase activity, acting on the CH-NH group of donors,GO:0016646~oxidoreductase activity, acting on the CH-NH group of donors, NAD or NADP as acceptor,	hsa00790:Folate biosynthesis,		10408783,11076863,11153907,11256614,1160969,11937441,12477932,14718574,15009710,15489334,15489336,16341674,16381901,17188538,18444252,19027726,19405953,2116088,2330583,3031582,3033643,3587329,3666748,3711039,3718470,6746636,6797415,7627180,8125298,8137944,8262916,8326489,9373149,9427141,9744478,
6470	SHMT1,	serine hydroxymethyltransferase 1 (soluble)	2.1.2.1,		bladder cancer,breast cancer,cardiovascular disease,colorectal cancer,colorectal cancer; folate, erythrocyte,drug hypersensitivity,esophageal cancer,esophageal cancer gastric cardiac cancer,head and neck cancer,hyperhomocysteinemia,leukemia, adult acute lymphocytic,lung cancer,lymphoma,lymphoma, non-Hodgkin,methotrexate toxicity,neural tube defects,non-Hodgkin's lymphoma,preterm delivery small-fo…		GO:0004372~glycine hydroxymethyltransferase activity,GO:0004793~threonine aldolase activity,GO:0008732~L-allo-threonine aldolase activity,GO:0016597~amino acid binding,GO:0016832~aldehyde-lyase activity,GO:0019842~vitamin binding,GO:0030170~pyridoxal phosphate binding,GO:0031406~carboxylic acid binding,GO:0042802~identical protein binding,GO:0042803~protein homodimerization activity,GO:0043176~am…	hsa00260:Glycine, serine and threonine metabolism,hsa00460:Cyanoamino acid metabolism,hsa00670:One carbon pool by folate,hsa00680:Methane metabolism,		10549165,10995219,11278996,11386852,11516159,11997338,12161434,12477932,12604405,12615003,14656021,15059614,15060097,15122597,15198953,15489334,15531579,15598699,15797993,16006999,16046727,16049973,16169070,16365025,16447238,16536979,17035141,17074544,17113224,17119116,17206530,17311259,17311260,17420066,17446168,17482557,17595805,17891500,17896178,17904392,18378616,18381459,18427977,18635682,188…
4645	LOC392335,LOC441420,MYO5B,	similar to acetyl-Coenzyme A acyltransferase 2 (mitochondrial 3-oxoacyl-Coenzyme A thiolase); similar to KIAA1119 protein; myosin VB		Microvillus inclusion disease,			GO:0000166~nucleotide binding,GO:0001882~nucleoside binding,GO:0001883~purine nucleoside binding,GO:0003774~motor activity,GO:0003779~actin binding,GO:0005516~calmodulin binding,GO:0005524~ATP binding,GO:0008092~cytoskeletal protein binding,GO:0017076~purine nucleotide binding,GO:0030554~adenyl nucleotide binding,GO:0032553~ribonucleotide binding,GO:0032555~purine ribonucleotide binding,GO:003255…			10574461,11408590,11495908,12477932,14702039,15489334,16214890,16344560,17053785,17462998,18317468,18669648,18724368,19006234,19008234,2236059,7757816,8022818,8884266,
6510	SLC1A5,	solute carrier family 1 (neutral amino acid transporter), member 5			cystic fibrosis,		GO:0005275~amine transmembrane transporter activity,GO:0005310~dicarboxylic acid transmembrane transporter activity,GO:0005343~organic acid:sodium symporter activity,GO:0008509~anion transmembrane transporter activity,GO:0015171~amino acid transmembrane transporter activity,GO:0015175~neutral amino acid transmembrane transporter activity,GO:0015293~symporter activity,GO:0015294~solute:cation symp…			10051606,10196349,11350958,11781704,12050356,12175968,12477932,12555937,12584318,12757936,14520239,14702039,15489334,15845389,15848195,16197915,16344560,16435221,16516348,16820059,17081065,17081983,17329400,17353931,17676482,18157695,18638388,18669648,8702519,
6566	SLC16A1,	solute carrier family 16, member 1 (monocarboxylic acid transporter 1)		Erythrocyte lactate transporter defect,Hyperinsulinemic hypoglycemia, familial, 7,			GO:0008028~monocarboxylic acid transmembrane transporter activity,GO:0015130~mevalonate transmembrane transporter activity,GO:0015293~symporter activity,GO:0015355~secondary active monocarboxylate transmembrane transporter activity,			10471310,10562613,10590411,10921872,11820324,11882670,11944921,11953883,12477932,12479094,12657613,12739169,12759536,12949353,1429658,14702039,14724187,15135232,15489334,15765403,15804185,15901598,16150873,16370372,16403470,16408234,16441976,17016429,17081983,17082373,17182800,17353931,17701893,17974005,18079261,18188595,18539591,18669648,18691976,18832090,19033536,19033663,7835905,8124722,888954…
9123	SLC16A3,	solute carrier family 16, member 3 (monocarboxylic acid transporter 4)					GO:0008028~monocarboxylic acid transmembrane transporter activity,GO:0015293~symporter activity,GO:0015355~secondary active monocarboxylate transmembrane transporter activity,			10510291,10921872,12477932,12657613,12739169,14702039,15489334,17081983,17502341,18669648,18691976,8125298,9373149,9425115,
9194	slc16a7,	solute carrier family 16, member 7 (monocarboxylic acid transporter 2)					GO:0005477~pyruvate secondary active transmembrane transporter activity,GO:0008028~monocarboxylic acid transmembrane transporter activity,GO:0015293~symporter activity,GO:0015355~secondary active monocarboxylate transmembrane transporter activity,GO:0050833~pyruvate transmembrane transporter activity,			12115955,12477932,12739169,14757520,15489334,17502341,18188595,18598673,9786900,
23539	SLC16A8,	solute carrier family 16, member 8 (monocarboxylic acid transporter 3)					GO:0008028~monocarboxylic acid transmembrane transporter activity,GO:0015129~lactate transmembrane transporter activity,GO:0015293~symporter activity,GO:0015355~secondary active monocarboxylate transmembrane transporter activity,			10493836,10591208,12657613,12739169,16169070,8889548,
6584	slc22a5,	solute carrier family 22 (organic cation/carnitine transporter), member 5		Carnitine deficiency, systemic primary,	cholangitis, sclerosing,Crohn's disease,Crohn's disease inflammatory bowel disease ulcerative colitis,Crohn's disease ulcerative colitis,Crohn's disease; ulcerative colitis,Crohn's disease; ulcerative colitis; inflammatory bowel disease,diabetes, type 1,left ventricular hypertrophy,perianal disease,psoriasis,psoriasis; arthritis, psoriatic; arthritis, inflammatory,rheumatoid arthritis,ulcerative …		GO:0000166~nucleotide binding,GO:0001882~nucleoside binding,GO:0001883~purine nucleoside binding,GO:0005275~amine transmembrane transporter activity,GO:0005524~ATP binding,GO:0015101~organic cation transmembrane transporter activity,GO:0015226~carnitine transporter activity,GO:0015238~drug transporter activity,GO:0015293~symporter activity,GO:0015651~quaternary ammonium group transmembrane transp…			10072434,10425211,10454528,10480371,10545605,10559218,10612840,10679939,12183691,12408185,12477932,12684216,12802501,14506273,14665638,14684825,14702039,15107849,15238359,15303004,15486076,15487009,15489334,15499185,15523054,15647998,15685536,15714519,15955786,16255050,16333318,16344053,16344054,16344560,16361305,16373276,16437728,16441470,16469794,16490820,16519742,16652416,16670523,16771961,167…
8034	slc25a16,	solute carrier family 25 (mitochondrial carrier; Graves disease autoantigen), member 16					GO:0015297~antiporter activity,GO:0015300~solute:solute antiporter activity,			11158296,12477932,1457817,14702039,15164054,15489334,2575220,8444471,
6576	slc25a1,	solute carrier family 25 (mitochondrial carrier; citrate transporter), member 1					GO:0015137~citrate transmembrane transporter activity,GO:0015142~tricarboxylic acid transmembrane transporter activity,			12477932,14702039,15489334,17353931,18706393,19240061,8660975,8666394,8776594,9254007,
8402	Slc25a11,	solute carrier family 25 (mitochondrial carrier; oxoglutarate carrier), member 11					GO:0005310~dicarboxylic acid transmembrane transporter activity,GO:0008509~anion transmembrane transporter activity,GO:0015140~malate transmembrane transporter activity,GO:0015297~antiporter activity,GO:0015300~solute:solute antiporter activity,GO:0015301~anion:anion antiporter activity,GO:0015367~oxoglutarate:malate antiporter activity,GO:0015556~C4-dicarboxylate transmembrane transporter activi…			10072597,12477932,12939596,1457818,15489334,16169070,16920706,8597574,8619474,8769314,9110174,9639574,
64078	SLC28A3,	solute carrier family 28 (sodium-coupled nucleoside transporter), member 3					GO:0001882~nucleoside binding,GO:0005337~nucleoside transmembrane transporter activity,GO:0005345~purine transmembrane transporter activity,GO:0005350~pyrimidine transmembrane transporter activity,GO:0005415~nucleoside:sodium symporter activity,GO:0015205~nucleobase transmembrane transporter activity,GO:0015293~symporter activity,GO:0015294~solute:cation symporter activity,GO:0015370~solute:sodiu…			11032837,12477932,14504928,14702039,15489334,15738947,15861042,15870078,16271041,16446384,17140564,17409283,17412768,17453413,17696452,17926640,17993510,18199742,18621735,18827020,19074885,19318496,
2030	Slc29a1,	solute carrier family 29 (nucleoside transporters), member 1					GO:0005337~nucleoside transmembrane transporter activity,GO:0015932~nucleobase, nucleoside, nucleotide and nucleic acid transmembrane transporter activity,			10755314,11584005,11814344,12006583,12008078,12097333,12384580,12389626,12477932,12527552,12820662,14574404,14607828,14667819,14702039,14759222,15489334,15529184,15557207,15632314,15649894,15933265,16333246,16344560,16595656,16609362,16688763,16818266,16818276,16858130,16959974,17162590,17409283,17658213,17921321,17926640,18064606,18187485,18462193,18600541,18635603,18669648,18703227,19116148,191…
3177	Slc29a2,	solute carrier family 29 (nucleoside transporters), member 2					GO:0005337~nucleoside transmembrane transporter activity,GO:0015932~nucleobase, nucleoside, nucleotide and nucleic acid transmembrane transporter activity,			12006583,12411296,12477932,12527552,12590919,12820662,12838422,14612157,14702039,15386342,15489334,15644498,15649894,16214850,16924660,17921321,17926640,18635603,18703227,18945750,19105964,7639753,9192854,9396714,9478986,
6520	SLC3A2,	solute carrier family 3 (activators of dibasic and neutral amino acid transport), member 2			melphalan pharmacokinetics melphalan side effects,	env:Envelope surface glycoprotein gp160, precursor,	GO:0005275~amine transmembrane transporter activity,GO:0005432~calcium:sodium antiporter activity,GO:0015171~amino acid transmembrane transporter activity,GO:0015175~neutral amino acid transmembrane transporter activity,GO:0015297~antiporter activity,GO:0015298~solute:cation antiporter activity,GO:0015300~solute:solute antiporter activity,GO:0015368~calcium:cation antiporter activity,GO:0015491~c…		12925876,7561057,8922468,9403839,	10506149,10574970,10631289,10673541,10903140,11311135,11389679,11406111,11435306,11507094,11557028,11564694,11696247,11742812,11749697,11840567,12117417,12181350,12225859,12235164,12270127,12477932,12493773,12531285,12716892,12740424,12754519,12925876,1358795,14527684,14603368,14702039,15146197,15178563,15274339,15458438,15485886,15489334,15556631,15625115,15713750,15769744,15980244,16335952,1634…
81539	SLC38A1,	solute carrier family 38, member 1					GO:0005275~amine transmembrane transporter activity,GO:0005283~sodium:amino acid symporter activity,GO:0005343~organic acid:sodium symporter activity,GO:0005416~cation:amino acid symporter activity,GO:0015171~amino acid transmembrane transporter activity,GO:0015175~neutral amino acid transmembrane transporter activity,GO:0015179~L-amino acid transmembrane transporter activity,GO:0015186~L-glutami…			10891391,11325958,12388062,12477932,14702039,15054072,15489334,16148032,16303743,16344560,16583402,17081983,17549407,18669648,18691976,18703994,8125298,9373149,
54407	slc38a2,	solute carrier family 38, member 2					GO:0005275~amine transmembrane transporter activity,GO:0015171~amino acid transmembrane transporter activity,GO:0015293~symporter activity,GO:0031402~sodium ion binding,GO:0031420~alkali metal ion binding,GO:0043167~ion binding,GO:0043169~cation binding,GO:0046872~metal ion binding,			10718198,10747860,10930503,12054432,12168954,12477932,14623874,14702039,15489334,15561425,15581851,15922329,15951569,16125834,16169070,16344560,16445384,16616430,16621798,16621896,17081983,17237199,18083107,18669648,18697751,18703994,
10991	Slc38a3,	solute carrier family 38, member 3					GO:0005275~amine transmembrane transporter activity,GO:0005290~L-histidine transmembrane transporter activity,GO:0015171~amino acid transmembrane transporter activity,GO:0015174~basic amino acid transmembrane transporter activity,GO:0015175~neutral amino acid transmembrane transporter activity,GO:0015179~L-amino acid transmembrane transporter activity,GO:0015180~L-alanine transmembrane transporte…			10619430,10823827,11076863,11085536,11230166,11256614,12477932,12788082,15094455,15342556,15489334,15489336,16169070,16381901,16432833,16641997,17974005,
55089	Slc38a4,	solute carrier family 38, member 4					GO:0005275~amine transmembrane transporter activity,GO:0015171~amino acid transmembrane transporter activity,GO:0015293~symporter activity,GO:0031402~sodium ion binding,GO:0031420~alkali metal ion binding,GO:0043167~ion binding,GO:0043169~cation binding,GO:0046872~metal ion binding,			11342143,11414754,12477932,12845534,14702039,15489334,16148032,16344560,18703994,19015196,
92745	slc38a5,	solute carrier family 38, member 5					GO:0005275~amine transmembrane transporter activity,GO:0015171~amino acid transmembrane transporter activity,GO:0015175~neutral amino acid transmembrane transporter activity,GO:0015187~glycine transmembrane transporter activity,			11243884,12477932,14702039,15489334,15498874,16344560,17333282,
8501	SLC43A1,	solute carrier family 43, member 1					GO:0005275~amine transmembrane transporter activity,GO:0015171~amino acid transmembrane transporter activity,GO:0015175~neutral amino acid transmembrane transporter activity,GO:0015179~L-amino acid transmembrane transporter activity,			11956097,12477932,12930836,14702039,15489334,9255310,972295,9722952,
124935	Slc43a2,	solute carrier family 43, member 2					GO:0005275~amine transmembrane transporter activity,GO:0015171~amino acid transmembrane transporter activity,GO:0015179~L-amino acid transmembrane transporter activity,			12477932,14702039,15489334,15498874,15659399,16303743,18669648,
11254	Slc6a14,	solute carrier family 6 (amino acid transporter), member 14		Obesity, susceptibility to,Obesity, susceptibility to, BMIQ11,Obesity, susceptibility to, X-linked,	obesity,		GO:0005275~amine transmembrane transporter activity,GO:0005326~neurotransmitter transporter activity,GO:0005328~neurotransmitter:sodium symporter activity,GO:0015171~amino acid transmembrane transporter activity,GO:0015293~symporter activity,GO:0015294~solute:cation symporter activity,GO:0015370~solute:sodium symporter activity,			10446133,10999806,12388375,12477932,14660737,14660752,15331564,15489334,15772651,15905073,18029348,18599538,18700007,19058789,
6541	SLC7A1,	solute carrier family 7 (cationic amino acid transporter, y+ system), member 1			endothelial dysfunction hypertension,		GO:0005275~amine transmembrane transporter activity,GO:0015171~amino acid transmembrane transporter activity,GO:0015174~basic amino acid transmembrane transporter activity,GO:0015179~L-amino acid transmembrane transporter activity,GO:0015181~arginine transmembrane transporter activity,			10485994,11665818,11891586,12202949,12388095,12477932,12787129,1348489,14702039,15057823,15064952,15086470,15342556,15489334,15491978,15631944,16344560,1718082,17325243,17494634,18172665,18574322,19067360,
6542	SLC7A2,	solute carrier family 7 (cationic amino acid transporter, y+ system), member 2					GO:0005275~amine transmembrane transporter activity,GO:0015171~amino acid transmembrane transporter activity,GO:0015174~basic amino acid transmembrane transporter activity,			11665818,12477932,12787129,15064952,15489334,16344560,16421571,17974005,18029348,18172665,18669648,8954799,9174363,
84889	SLC7A3,	solute carrier family 7 (cationic amino acid transporter, y+ system), member 3					GO:0000064~L-ornithine transmembrane transporter activity,GO:0005275~amine transmembrane transporter activity,GO:0015171~amino acid transmembrane transporter activity,GO:0015174~basic amino acid transmembrane transporter activity,GO:0015179~L-amino acid transmembrane transporter activity,GO:0015181~arginine transmembrane transporter activity,GO:0015189~L-lysine transmembrane transporter activity,…			10446328,11591158,12477932,14702039,15489334,15737334,16303743,16332251,18029348,9079705,9334265,
8140	SLC7A5,	solute carrier family 7 (cationic amino acid transporter, y+ system), member 5			melphalan pharmacokinetics melphalan side effects,	env:Envelope surface glycoprotein gp160, precursor,	GO:0003823~antigen binding,GO:0005275~amine transmembrane transporter activity,GO:0015171~amino acid transmembrane transporter activity,GO:0015175~neutral amino acid transmembrane transporter activity,GO:0015179~L-amino acid transmembrane transporter activity,GO:0042277~peptide binding,GO:0042605~peptide antigen binding,		12925876,7561057,8922468,9403839,	10049700,10072483,10391915,10568788,10574970,10629848,11095508,11311135,11389679,11535130,11557028,11564694,11742812,12009310,12117417,12225859,12477932,12824232,12925876,15178563,15200428,15302935,15489334,15589117,15769744,15900591,1597461,16027961,16097034,16175382,16496379,17558306,17622555,18253116,18262359,18294274,18382329,18440724,18781797,18813831,19018776,19121087,19184136,19347882,7561…
9057	SLC7A6,	solute carrier family 7 (cationic amino acid transporter, y+ system), member 6					GO:0005275~amine transmembrane transporter activity,GO:0015171~amino acid transmembrane transporter activity,GO:0015297~antiporter activity,			10903140,11078698,11311135,11742806,12477932,14603368,15280038,15342556,15489334,15756301,16785209,17197568,17329401,17974005,9039502,9829974,9878049,
56301	SLC7A10,	solute carrier family 7, (neutral amino acid transporter, y+ system) member 10					GO:0005275~amine transmembrane transporter activity,GO:0015171~amino acid transmembrane transporter activity,GO:0015175~neutral amino acid transmembrane transporter activity,GO:0015179~L-amino acid transmembrane transporter activity,GO:0015194~L-serine transmembrane transporter activity,GO:0022889~serine transmembrane transporter activity,			10734121,10863037,11441184,11509015,12477932,14702039,15458438,15489334,
6548	slc9a1,	solute carrier family 9 (sodium/hydrogen exchanger), member 1			diabetes, type 1,Posttransplantation diabetes mellitus (PTDM),stroke, ischemic,		GO:0005451~monovalent cation:hydrogen antiporter activity,GO:0008134~transcription factor binding,GO:0015077~monovalent inorganic cation transmembrane transporter activity,GO:0015078~hydrogen ion transmembrane transporter activity,GO:0015297~antiporter activity,GO:0015298~solute:cation antiporter activity,GO:0015299~solute:hydrogen antiporter activity,GO:0015300~solute:solute antiporter activity,…	hsa04260:Cardiac muscle contraction,hsa04810:Regulation of actin cytoskeleton,		10713111,10913675,11163215,11279064,11350981,11369779,11604491,11696366,11852051,12065894,12138085,12226101,12477932,12479094,12549930,12562776,12576672,12598940,12626508,12682826,12765964,12809501,12905871,14680478,14702039,15035633,15096511,15253667,15269707,15465015,15489334,15523538,15535843,15610042,15677483,15772858,15823043,15843433,16002403,16189514,16306134,16344560,16475831,16511206,167…
6549	SLC9A2,	solute carrier family 9 (sodium/hydrogen exchanger), member 2			hypertension,		GO:0005451~monovalent cation:hydrogen antiporter activity,GO:0015077~monovalent inorganic cation transmembrane transporter activity,GO:0015078~hydrogen ion transmembrane transporter activity,GO:0015297~antiporter activity,GO:0015298~solute:cation antiporter activity,GO:0015299~solute:hydrogen antiporter activity,GO:0015300~solute:solute antiporter activity,GO:0015385~sodium:hydrogen antiporter ac…			10187839,10444453,10579058,11254504,11350981,11408268,12477932,12576672,1318024,15664417,15815621,16959974,16982955,17561809,17881426,17943310,19056765,7683411,8595899,8843774,8901634,9847074,
6550	SLC9A3,	solute carrier family 9 (sodium/hydrogen exchanger), member 3			hypertension,		GO:0005451~monovalent cation:hydrogen antiporter activity,GO:0015077~monovalent inorganic cation transmembrane transporter activity,GO:0015078~hydrogen ion transmembrane transporter activity,GO:0015297~antiporter activity,GO:0015298~solute:cation antiporter activity,GO:0015299~solute:hydrogen antiporter activity,GO:0015300~solute:solute antiporter activity,GO:0015385~sodium:hydrogen antiporter ac…			10364184,10452823,10506918,11408268,11841999,12167607,12397398,12477932,12542207,12576672,12665801,12763917,12799307,14531806,14580213,15070904,15197272,15201541,15342556,15489334,15531580,15754324,1577762,15911629,16421216,16464174,16760259,16971495,17276988,17307723,17540780,17881426,18085326,18433466,18614797,18801914,19056765,19088451,19303862,7631746,8096830,8795445,8843774,8901634,9748260,
389015	Slc9a4,	solute carrier family 9 (sodium/hydrogen exchanger), member 4		Newly identified genetic risk variants for celiac disease related to the immune response,			GO:0005451~monovalent cation:hydrogen antiporter activity,GO:0015077~monovalent inorganic cation transmembrane transporter activity,GO:0015078~hydrogen ion transmembrane transporter activity,GO:0015297~antiporter activity,GO:0015298~solute:cation antiporter activity,GO:0015299~solute:hydrogen antiporter activity,GO:0015300~solute:solute antiporter activity,GO:0015385~sodium:hydrogen antiporter ac…			12576672,16344560,17370265,17943310,17974005,18311140,8199403,
6553	SLC9A5,	solute carrier family 9 (sodium/hydrogen exchanger), member 5					GO:0005451~monovalent cation:hydrogen antiporter activity,GO:0015077~monovalent inorganic cation transmembrane transporter activity,GO:0015078~hydrogen ion transmembrane transporter activity,GO:0015297~antiporter activity,GO:0015298~solute:cation antiporter activity,GO:0015299~solute:hydrogen antiporter activity,GO:0015300~solute:solute antiporter activity,GO:0015385~sodium:hydrogen antiporter ac…			12205089,12417987,12576672,12598940,14702039,15699339,16920332,7759094,9933641,9933642,
56848	SPHK2,	sphingosine kinase 2	2.7.1.91,				GO:0000166~nucleotide binding,GO:0001727~lipid kinase activity,GO:0001882~nucleoside binding,GO:0001883~purine nucleoside binding,GO:0004143~diacylglycerol kinase activity,GO:0005524~ATP binding,GO:0008481~sphinganine kinase activity,GO:0017016~Ras GTPase binding,GO:0017050~D-erythro-sphingosine kinase activity,GO:0017076~purine nucleotide binding,GO:0019899~enzyme binding,GO:0030554~adenyl nucle…	hsa00600:Sphingolipid metabolism,hsa04020:Calcium signaling pathway,hsa04370:VEGF signaling pathway,hsa04666:Fc gamma R-mediated phagocytosis,		10751414,11230166,11777919,12391145,12477932,14596938,14702039,15489334,15951439,16103110,17311928,17635916,17895250,18178871,18263879,18691976,19168031,19240026,8786133,
6319	scd,	stearoyl-CoA desaturase (delta-9-desaturase)	1.14.19.1,		diabetes, type 2,		GO:0004768~stearoyl-CoA 9-desaturase activity,GO:0005506~iron ion binding,GO:0016717~oxidoreductase activity, acting on paired donors, with oxidation of a pair of donors resulting in the reduction of molecular oxygen to two molecules of water,GO:0043167~ion binding,GO:0043169~cation binding,GO:0046872~metal ion binding,GO:0046914~transition metal ion binding,	hsa01040:Biosynthesis of unsaturated fatty acids,hsa03320:PPAR signaling pathway,		10229681,10922050,11181995,11397803,11415448,11677241,12061775,12401889,12477932,14683458,14702039,14967817,14967823,15164054,15489334,15609334,15662557,15708362,15851470,15855323,15907797,16213227,16723740,17614770,17636091,17852835,18030445,18286258,18340007,18499418,18660489,18691976,18697866,18813799,18832746,18952834,19130493,19154947,21148,6102994,7909540,8125298,9362069,9373149,

## Sheet: HIV_INTERACTION
ID	OFFICIAL_GENE_SYMBOL	HIV_INTERACTION
2879	GPX4,	tat:Tat,
1374	Cpt1a,	env:Envelope surface glycoprotein gp160, precursor,
1376	cpt2,	env:Envelope surface glycoprotein gp160, precursor,
1375	CHKB,Cpt1b,	env:Envelope surface glycoprotein gp160, precursor,
6520	SLC3A2,	env:Envelope surface glycoprotein gp160, precursor,
8140	SLC7A5,	env:Envelope surface glycoprotein gp160, precursor,
126129	Cpt1c,	env:Envelope surface glycoprotein gp160, precursor,
