# Supplementary material for: Genome-wide metabolic model to improve understanding of CD4+ T cell metabolism, immunometabolism and application in drug design
Source: Royal Society of Chemistry journal article supplement (doi:10.1039/c5mb00480b), 2015-11-18
Supplement: c5mb00480b1.zip [file supplementary_Table_4-fatty_acid_metabolism.xlsx]

## Sheet: Fatty acid metabolic reactions
som of the significantly changed reactions in Fatty acid metabolism
reaction	subsystem	formula	foldchange
FAOXC101C102x	Fatty acid oxidation	o2[x] + dece4coa[x] -> h2o2[x] + dec24dicoa[x]	-1.64429
FAOXC101C8x	Fatty acid oxidation	nad[x] + coa[x] + h2o[x] + dc2coa[x] -> h[x] + nadh[x] + accoa[x] + occoa[x]	-1.64429
FAOXC102C101x	Fatty acid oxidation	h[x] + nadph[x] + dec24dicoa[x] -> nadp[x] + dece3coa[x]	-1.64429
FAOXC10C8x	Fatty acid oxidation	nad[x] + coa[x] + dcacoa[x] + o2[x] + h2o[x] -> h[x] + nadh[x] + accoa[x] + occoa[x] + h2o2[x]	-2.15117
FOAXC122C101x	Fatty acid oxidation	nad[x] + coa[x] + h2o[x] + 2ddecdicoa[x] -> h[x] + nadh[x] + accoa[x] + dece4coa[x]	-1.64429
FAOXC12C10x	Fatty acid oxidation	nad[x] + coa[x] + ddcacoa[x] + o2[x] + h2o[x] -> h[x] + nadh[x] + accoa[x] + dcacoa[x] + h2o2[x]	-1.89108
FAOXC142C122x	Fatty acid oxidation	nad[x] + coa[x] + o2[x] + h2o[x] + tetdecdicoa[x] -> h[x] + nadh[x] + accoa[x] + h2o2[x] + 3ddecdicoa[x]	-1.64429
FAOXC14C12x	Fatty acid oxidation	nad[x] + coa[x] + tdcoa[x] + o2[x] + h2o[x] -> h[x] + nadh[x] + accoa[x] + ddcacoa[x] + h2o2[x]	-2.10226
FAOXC163C142x	Fatty acid oxidation	nad[x] + coa[x] + h2o[x] + 2hexdtricoa[x] -> h[x] + nadh[x] + accoa[x] + tetdecdicoa[x]	-1.64429
FAOXC163C164x	Fatty acid oxidation	o2[x] + 4hexdtricoa[x] -> h2o2[x] + hexdectecoa[x]	-1.64429
FAOXC164C163x	Fatty acid oxidation	h[x] + nadph[x] + hexdectecoa[x] -> nadp[x] + 3hexdtricoa[x]	-1.64429
FAOXC16C14x	Fatty acid oxidation	nad[x] + coa[x] + pmtcoa[x] + o2[x] + h2o[x] -> h[x] + nadh[x] + accoa[x] + tdcoa[x] + h2o2[x]	-2.10226
FAOXC184C163x	Fatty acid oxidation	nad[x] + coa[x] + h2o[x] + 2octdectecoa[x] -> h[x] + nadh[x] + accoa[x] + 4hexdtricoa[x]	-1.64429
FAOXC204C205x	Fatty acid oxidation	o2[x] + eitetcoa[x] -> h2o2[x] + eipencoa[x]	-1.64429
FAOXC205C184x	Fatty acid oxidation	nad[x] + coa[x] + h2o[x] + eipencoa[x] -> h[x] + nadh[x] + accoa[x] + 3octdectecoa[x]	-1.64429
FAOXC225C204x	Fatty acid oxidation	nad[x] + coa[x] + h2o[x] + 2docopencoa[x] -> h[x] + nadh[x] + accoa[x] + eitetcoa[x]	-1.64429
FAOXC225C226x	Fatty acid oxidation	o2[x] + dcsptn1coa[x] -> h2o2[x] + docohexcoa[x]	-1.64429
FAOXC226C225x	Fatty acid oxidation	h[x] + nadph[x] + docohexcoa[x] -> nadp[x] + 3docopencoa[x]	-1.64429
FAOXC121C10x	Fatty acid oxidation	nad[x] + coa[x] + h2o[x] + dd2coa[x] -> h[x] + nadh[x] + accoa[x] + dcacoa[x]	-2.15935
FAOXC101x	Fatty acid oxidation	dece3coa[x] -> dc2coa[x]	-1.64429
FAOXC122x	Fatty acid oxidation	3ddecdicoa[x] -> 2ddecdicoa[x]	-1.64429
FAOXC163x	Fatty acid oxidation	3hexdtricoa[x] -> 2hexdtricoa[x]	-1.64429
FAOXC184x	Fatty acid oxidation	3octdectecoa[x] -> 2octdectecoa[x]	-1.64429
FAOXC225x	Fatty acid oxidation	3docopencoa[x] -> 2docopencoa[x]	-1.64429
r0661	Fatty acid oxidation	h2o[x] + dd2coa[x] -> HC01401[x]	-1.88663
r0723	Fatty acid oxidation	nad[x] + HC01401[x] -> h[x] + nadh[x] + 3oddcoa[x]	-1.88663
r0729	Fatty acid oxidation	h2o[x] + HC01414[x] -> HC01403[x]	-1.87939
r0727	Fatty acid oxidation	nad[x] + HC01403[x] -> h[x] + nadh[x] + 3odcoa[x]	-1.87939
ACACT4p	Fatty acid oxidation	coa[x] + 3odcoa[x] -> accoa[x] + occoa[x]	-1.87939
ACACT5p	Fatty acid oxidation	coa[x] + 3oddcoa[x] -> accoa[x] + dcacoa[x]	-1.88663
r1400	Fatty acid oxidation	ppcoa[c] + crn[m] -> ppcoa[m] + crn[c]	-1.71155
FAOXC183806x	Fatty acid oxidation	5 nad[x] + 5 coa[x] + 2 o2[x] + 5 h2o[x] + lnlncgcoa[x] -> 5 h[x] + 5 nadh[x] + 5 accoa[x] + occoa[x] + 2 h2o2[x]	-2.11367
FAOXC180x	Fatty acid oxidation	nad[x] + coa[x] + o2[x] + h2o[x] + stcoa[x] -> h[x] + nadh[x] + accoa[x] + pmtcoa[x] + h2o2[x]	-1.96751
FAOXC240200x	Fatty acid oxidation	2 nad[x] + 2 coa[x] + 2 o2[x] + 2 h2o[x] + lgnccoa[x] -> 2 h[x] + 2 nadh[x] + 2 accoa[x] + 2 h2o2[x] + arachcoa[x]	-1.8551
FAOXC200180x	Fatty acid oxidation	nad[x] + coa[x] + o2[x] + h2o[x] + arachcoa[x] -> h[x] + nadh[x] + accoa[x] + h2o2[x] + stcoa[x]	-1.8551
FAOXC2251836x	Fatty acid oxidation	2 nad[x] + 2 coa[x] + 2 h2o[x] + dcsptn1coa[x] -> 2 h[x] + 2 nadh[x] + 2 accoa[x] + lnlncgcoa[x]	-1.81304
FAOXC2242046x	Fatty acid oxidation	nad[x] + coa[x] + o2[x] + h2o[x] + adrncoa[x] -> h[x] + nadh[x] + accoa[x] + h2o2[x] + arachdcoa[x]	-1.79985
FAOXC18480x	Fatty acid oxidation	5 nad[x] + 5 coa[x] + o2[x] + 5 h2o[x] + strdnccoa[x] -> 5 h[x] + 5 nadh[x] + 5 accoa[x] + occoa[x] + h2o2[x]	-1.48063
FAOXC2252053x	Fatty acid oxidation	nad[x] + coa[x] + o2[x] + h2o[x] + dcsptn1coa[x] -> h[x] + nadh[x] + accoa[x] + h2o2[x] + tmndnccoa[x]	-1.46011
FAOXC16080x	Fatty acid oxidation	4 nad[x] + 4 coa[x] + pmtcoa[x] + 4 o2[x] + 4 h2o[x] -> 4 h[x] + 4 nadh[x] + 4 accoa[x] + occoa[x] + 4 h2o2[x]	-1.33791
C180CRNt	Fatty acid oxidation	stcrn[c] -> stcrn[m]	-2.2458
CSNATr	Fatty acid oxidation	accoa[c] + crn[c] <=> coa[c] + acrn[c]	-1.36712
CSNATp	Fatty acid oxidation	accoa[x] + crn[x] <=> coa[x] + acrn[x]	-1.2505
TTDCPT1	Fatty acid oxidation	crn[c] + tdcoa[c] -> coa[c] + ttdcrn[c]	-1.15572
C180CPT2	Fatty acid oxidation	coa[m] + stcrn[m] -> crn[m] + stcoa[m]	-2.2458
TTDCPT2	Fatty acid oxidation	coa[m] + ttdcrn[m] -> crn[m] + tdcoa[m]	-1.15572
r1443	Fatty acid oxidation	ddcacoa[x] + o2[x] -> h2o2[x] + dd2coa[x]	-2.2173
r1445	Fatty acid oxidation	dcacoa[x] + o2[x] -> h2o2[x] + HC01414[x]	-1.87939
r1488	Fatty acid oxidation	atp[c] + coa[c] + hdcea[c] -> amp[c] + ppi[c] + HC10852[c]	-36.9949
r1260	Fatty acid oxidation	atp[r] + coa[r] + lnlncg[r] -> amp[r] + h[r] + ppi[r] + lnlncgcoa[r]	-3.83847
r1259	Fatty acid oxidation	atp[r] + coa[r] + lnlnca[r] -> amp[r] + h[r] + ppi[r] + lnlncgcoa[r]	-2.71606
r1254	Fatty acid oxidation	atp[c] + 8 h[c] + coa[c] + strdnc[c] -> amp[c] + ppi[c] + stcoa[c]	-1.62652
r1257	Fatty acid oxidation	atp[r] + coa[r] + lnlc[r] -> amp[r] + h[r] + ppi[r] + lnlccoa[r]	-1.16956
FACOAL1812	Fatty acid oxidation	atp[c] + coa[c] + vacc[c] -> amp[c] + ppi[c] + vacccoa[c]	-4.73499
FACOAL1822	Fatty acid oxidation	atp[c] + coa[c] + lneldc[c] -> amp[c] + ppi[c] + lneldccoa[c]	-4.40331
FACOAL1821	Fatty acid oxidation	atp[c] + coa[c] + lnlc[c] -> amp[c] + ppi[c] + lnlccoa[c]	-3.78545
FACOAL184	Fatty acid oxidation	atp[c] + coa[c] + strdnc[c] -> amp[c] + ppi[c] + strdnccoa[c]	-2.18442
FACOAL1831	Fatty acid oxidation	atp[c] + coa[c] + lnlncg[c] -> amp[c] + ppi[c] + lnlncgcoa[c]	-2.09057
FACOAL224	Fatty acid oxidation	atp[c] + coa[c] + adrn[c] -> amp[c] + ppi[c] + adrncoa[c]	-1.98606
FACOAL2251	Fatty acid oxidation	atp[c] + coa[c] + dcsptn1[c] -> amp[c] + ppi[c] + dcsptn1coa[c]	-1.88279
FACOAL240	Fatty acid oxidation	atp[c] + coa[c] + lgnc[c] -> amp[c] + ppi[c] + lgnccoa[c]	-1.8551
FACOAL2252	Fatty acid oxidation	atp[c] + coa[c] + clpnd[c] -> amp[c] + ppi[c] + clpndcoa[c]	-1.36634
FACOAL1832	Fatty acid oxidation	atp[c] + coa[c] + lnlnca[c] -> amp[c] + ppi[c] + lnlncacoa[c]	-1.05954
FACOAL140i	Fatty acid oxidation	atp[c] + coa[c] + ttdca[c] -> amp[c] + ppi[c] + tdcoa[c]	-2.54525
r0311	Fatty acid oxidation	atp[r] + coa[r] + hdca[r] -> amp[r] + h[r] + ppi[r] + pmtcoa[r]	-4.28005
C180CPT1	Fatty acid oxidation	crn[c] + stcoa[c] -> coa[c] + stcrn[c]	-2.2458
TTDCRNt	Fatty acid oxidation	ttdcrn[c] -> ttdcrn[m]	-1.15572
LNLCCPT2	Fatty acid oxidation	coa[m] + lnlccrn[m] -> crn[m] + lnlccoa[m]	1.12159
LNLCCRNt	Fatty acid oxidation	lnlccrn[c] -> lnlccrn[m]	1.12159
LNLCCPT1	Fatty acid oxidation	crn[c] + lnlccoa[c] -> coa[c] + lnlccrn[c]	1.12159
FAOXC2251836m	Fatty acid oxidation	2 h2o[m] + 2 coa[m] + 2 nad[m] + dcsptn1coa[m] -> 2 h[m] + 2 nadh[m] + 2 accoa[m] + lnlncgcoa[m]	1.13427
FAOXC183806m	Fatty acid oxidation	2 o2[m] + 5 h2o[m] + 5 coa[m] + 5 nad[m] + lnlncgcoa[m] -> 5 h[m] + 5 nadh[m] + 5 accoa[m] + 2 h2o2[m] + occoa[m]	1.15951
LCAT1e	Fatty acid oxidation	chsterol[e] + pchol_hs[e] -> lpchol_hs[e] + xolest2_hs[e]	1.21544
FAOXC161802m	Fatty acid oxidation	4 h2o[m] + 4 coa[m] + 4 nad[m] + 3 fad[m] + hdd2coa[m] -> 4 h[m] + 4 nadh[m] + 4 accoa[m] + 3 fadh2[m] + occoa[m]	1.24244
r0310	Fatty acid oxidation	pmtcoa[m] + q10[m] -> hdd2coa[m] + q10h2[m]	1.24244
r0443	Fatty acid oxidation	arachdcoa[x] + crn[x] -> coa[x] + arachdcrn[x]	1.4776
r1449	Fatty acid oxidation	q10[m] + tdcoa[m] -> q10h2[m] + HC01412[m]	1.5758
r0652	Fatty acid oxidation	nadp[m] + tdcoa[m] <=> h[m] + nadph[m] + HC01412[m]	1.5758
LNLNCGCPT2	Fatty acid oxidation	coa[m] + lnlncgcrn[m] -> crn[m] + lnlncgcoa[m]	1.65115
LNLNCGCPT1	Fatty acid oxidation	crn[c] + lnlncgcoa[c] -> coa[c] + lnlncgcrn[c]	1.65115
LNLNCGCRNt	Fatty acid oxidation	lnlncgcrn[c] -> lnlncgcrn[m]	1.65115
DESAT18_8	Fatty acid synthesis	o2[c] + h[c] + nadh[c] + od2coa[c] -> 2 h2o[c] + nad[c] + lneldccoa[c]	-5.4915
DESAT18_6	Fatty acid synthesis	o2[c] + h[c] + nadh[c] + odecoa[c] -> 2 h2o[c] + nad[c] + lneldccoa[c]	-4.71007
DESAT18_7	Fatty acid synthesis	o2[c] + h[c] + nadh[c] + vacccoa[c] -> 2 h2o[c] + nad[c] + lneldccoa[c]	-4.44176
DESAT18_9	Fatty acid synthesis	o2[c] + h[c] + nadh[c] + lnlccoa[c] -> 2 h2o[c] + nad[c] + lnlncgcoa[c]	-2.18299
DESAT22_1p	Fatty acid synthesis	h[x] + nadh[x] + o2[x] + adrncoa[x] -> nad[x] + 2 h2o[x] + dcsptn1coa[x]	-2.01148
DESAT22_2p	Fatty acid synthesis	h[x] + nadh[x] + o2[x] + clpndcoa[x] -> nad[x] + 2 h2o[x] + c226coa[x]	-1.22474
FAS100COA	Fatty acid synthesis	3 h[c] + 2 nadph[c] + malcoa[c] + occoa[c] -> h2o[c] + 2 nadp[c] + co2[c] + coa[c] + dcacoa[c]	-60.4459
FAS80COA_L	Fatty acid synthesis	9 h[c] + 6 nadph[c] + accoa[c] + 3 malcoa[c] -> 3 h2o[c] + 6 nadp[c] + 3 co2[c] + 3 coa[c] + occoa[c]	-58.4421
FAS120COA	Fatty acid synthesis	3 h[c] + 2 nadph[c] + malcoa[c] + dcacoa[c] -> h2o[c] + 2 nadp[c] + co2[c] + coa[c] + ddcacoa[c]	-60.3213
FAS140COA	Fatty acid synthesis	3 h[c] + 2 nadph[c] + malcoa[c] + ddcacoa[c] -> h2o[c] + 2 nadp[c] + co2[c] + coa[c] + tdcoa[c]	-60.2467
FAS160COA	Fatty acid synthesis	3 h[c] + 2 nadph[c] + malcoa[c] + tdcoa[c] -> h2o[c] + 2 nadp[c] + co2[c] + coa[c] + pmtcoa[c]	-60.8687
FAS180COA	Fatty acid synthesis	3 h[c] + 2 nadph[c] + malcoa[c] + pmtcoa[c] -> h2o[c] + 2 nadp[c] + co2[c] + coa[c] + stcoa[c]	-52.4891
DESAT18_4	Fatty acid synthesis	o2[c] + h[c] + nadh[c] + stcoa[c] -> 2 h2o[c] + nad[c] + vacccoa[c]	-4.26267
DESAT18_3	Fatty acid synthesis	o2[c] + h[c] + nadh[c] + stcoa[c] -> 2 h2o[c] + nad[c] + odecoa[c]	-2.12579

## Sheet: Top 10 prctile rxn markers_acc1
reaction	subsystem	formula	weight
ASPTA	Alanine and aspartate metabolism	akg[c] + asp_L[c] <=> glu_L[c] + oaa[c]	-619.629
AGDC	Aminosugar metabolism	h2o[c] + acgam6p[c] -> gam6p[c] + ac[c]	1411.35
AMANK	Aminosugar metabolism	atp[c] + 2 h[c] + acmana[c] -> adp[c] + acmanap[c]	580.586
G6PDA	Aminosugar metabolism	h2o[c] + gam6p[c] -> nh4[c] + f6p[c]	-624.876
G5SADrm	Arginine and Proline Metabolism	glu5sa[m] -> h[m] + h2o[m] + 1pyr5c[m]	1430.7
P5CRxm	Arginine and Proline Metabolism	2 h[m] + nadh[m] + 1pyr5c[m] -> nad[m] + pro_L[m]	-1270.98
ACITL	Citric acid cycle	atp[c] + 3 h[c] + coa[c] + cit[c] -> adp[c] + pi[c] + accoa[c] + oaa[c]	-1298.8
ACONT	Citric acid cycle	cit[c] <=> icit[c]	1221.03
CSm	Citric acid cycle	h2o[m] + accoa[m] + oaa[m] -> h[m] + coa[m] + cit[m]	2396.88
FUM	Citric acid cycle	h2o[c] + fum[c] <=> mal_L[c]	741.488
ICDHyrm	Citric acid cycle	nadp[m] + icit[m] <=> nadph[m] + akg[m] + co2[m]	-1277.53
r0679	CoA catabolism	atp[c] + 2 h[c] + HC01231[c] <=> adp[c] + 4ppcys[c]	1289.03
PPNCL3	CoA synthesis	atp[c] + cys_L[c] + 4ppan[c] -> h[c] + amp[c] + ppi[c] + 4ppcys[c]	632.398
PTPAT	CoA synthesis	atp[c] + h[c] + pan4p[c] -> ppi[c] + dpcoa[c]	646.948
ACCOAC	Exchange	atp[c] + 2 h[c] + hco3[c] + accoa[c] -> adp[c] + pi[c] + malcoa[c]	2291.28
MCD	Exchange	h[c] + malcoa[c] -> co2[c] + accoa[c]	-1717.64
C16txc	Exchange	h2o[c] + atp[c] + pmtcoa[c] -> adp[c] + h[c] + pi[c] + pmtcoa[x]	-768.934
C6CRNtcx	Exchange	c6crn[x] <=> c6crn[c]	-1331.39
FAOXC14C12m	Exchange	h2o[m] + coa[m] + nad[m] + fad[m] + tdcoa[m] -> h[m] + nadh[m] + accoa[m] + fadh2[m] + ddcacoa[m]	-727.151
OCD11CRNCACT	Exchange	ocdececrn[c] <=> ocdececrn[m]	-2002.96
STCOATxc	Exchange	h2o[c] + atp[c] + stcoa[c] -> adp[c] + h[c] + pi[c] + stcoa[x]	-2042.37
STRDNCCOAtxc	Exchange	h2o[c] + atp[c] + strdnccoa[c] -> adp[c] + h[c] + pi[c] + strdnccoa[x]	-1728.15
CYSATB0tc	Exchange	2 na1[e] + cys_L[e] + cl[e] -> 2 na1[c] + cys_L[c] + cl[c]	-786.552
CYSSNAT5tc	Exchange	h[c] + na1[e] + cys_L[e] <=> h[e] + na1[c] + cys_L[c]	-833.17
GLNyLATthc	Exchange	h[e] + gln_L[e] + arg_L[c] -> h[c] + gln_L[c] + arg_L[e]	914.576
GLYSNAT5tc	Exchange	h[c] + na1[e] + gly[e] <=> h[e] + na1[c] + gly[c]	-833.245
ILEPHELAT2tc	Exchange	ile_L[e] + phe_L[c] -> phe_L[e] + ile_L[c]	635.78
METATB0tc	Exchange	2 na1[e] + cl[e] + met_L[e] -> 2 na1[c] + met_L[c] + cl[c]	-786.729
PALFATPtc	Exchange	atp[c] + coa[c] + hdca[e] -> amp[c] + ppi[c] + pmtcoa[c]	563.347
PHEATB0tc	Exchange	2 na1[e] + cl[e] + phe_L[e] -> 2 na1[c] + cl[c] + phe_L[c]	-873.509
SERATB0tc	Exchange	2 na1[e] + ser_L[e] + cl[e] -> 2 na1[c] + ser_L[c] + cl[c]	2184.92
THRPHELAT2tc	Exchange	thr_L[e] + phe_L[c] -> thr_L[c] + phe_L[e]	618.095
TRPATB0tc	Exchange	2 na1[e] + cl[e] + trp_L[e] -> 2 na1[c] + cl[c] + trp_L[c]	-873.519
TYRATB0tc	Exchange	2 na1[e] + cl[e] + tyr_L[e] -> 2 na1[c] + cl[c] + tyr_L[c]	2271.88
TYRPHELAT2tc	Exchange	tyr_L[e] + phe_L[c] -> phe_L[e] + tyr_L[c]	3145.28
VALPHELAT2tc	Exchange	val_L[e] + phe_L[c] -> phe_L[e] + val_L[c]	618.095
ARACHFATPc	Exchange	atp[c] + coa[c] + arach[e] -> amp[c] + ppi[c] + arachcoa[c]	-608.735
RTOTAL2FATPc	Exchange	atp[c] + coa[c] + Rtotal2[e] -> amp[c] + ppi[c] + Rtotal2coa[c]	-787.837
RTOTAL3FATPc	Exchange	atp[c] + coa[c] + Rtotal3[e] -> amp[c] + ppi[c] + Rtotal3coa[c]	582.49
ARTFR211	Exchange	2 h[m] + 2 nadph[m] + 3 fadh2[m] + clpndcoa[c] -> 2 nadp[m] + 3 fad[m] + 1.375 R2coa_hs[c]	866.851
ARTFR213	Exchange	3 h[m] + 3 nadph[m] + 3 fadh2[m] + c226coa[c] -> 3 nadp[m] + 3 fad[m] + 1.375 R2coa_hs[c]	879.514
ARTFR41	Exchange	fadh2[m] + hdcoa[c] -> fad[m] + R4coa_hs[c]	2445.99
RTOT1	Exchange	R1coa_hs[c] -> Rtotalcoa[c]	890.024
RTOT3	Exchange	R3coa_hs[c] -> Rtotalcoa[c]	-1357.11
RTOT4	Exchange	R4coa_hs[c] -> Rtotalcoa[c]	-1557.51
MOGAT	Exchange	Rtotalcoa[c] + mag_hs[c] -> coa[c] + dag_hs[c]	-779.011
ACOAHi	Exchange	h2o[c] + accoa[c] -> h[c] + coa[c] + ac[c]	1410.99
G3PD2m	Exchange	fad[m] + glyc3p[c] -> fadh2[m] + dhap[c]	649.612
ADK1	Exchange	atp[c] + 6 h[c] + amp[c] <=> 2 adp[c]	926.29
ADK1m	Exchange	atp[m] + amp[m] <=> h[m] + 2 adp[m]	918.19
C204CPT2	Fatty acid oxidation	coa[m] + arachdcrn[m] -> crn[m] + arachdcoa[m]	-557.22
CSNATr	Fatty acid oxidation	accoa[c] + crn[c] <=> coa[c] + acrn[c]	678.035
FACOAL160i	Fatty acid oxidation	atp[c] + coa[c] + hdca[c] -> amp[c] + ppi[c] + pmtcoa[c]	-596.49
FACOAL1821	Fatty acid oxidation	atp[c] + coa[c] + lnlc[c] -> amp[c] + ppi[c] + lnlccoa[c]	-685.29
FACOAL1831	Fatty acid oxidation	atp[c] + coa[c] + lnlncg[c] -> amp[c] + ppi[c] + lnlncgcoa[c]	1263.79
FAOXC140	Fatty acid oxidation	6 h2o[m] + 6 coa[m] + 6 nad[m] + 6 fad[m] + tdcoa[m] -> 6 h[m] + 6 nadh[m] + 7 accoa[m] + 6 fadh2[m]	-1206.66
FAOXC160	Fatty acid oxidation	7 h2o[m] + 7 coa[m] + 7 nad[m] + 7 fad[m] + pmtcoa[m] -> 7 h[m] + 7 nadh[m] + 8 accoa[m] + 7 fadh2[m]	-1201.86
FAOXC16080m	Fatty acid oxidation	4 h2o[m] + 4 coa[m] + 4 nad[m] + 4 fad[m] + pmtcoa[m] -> 4 h[m] + 4 nadh[m] + 4 accoa[m] + 4 fadh2[m] + occoa[m]	-725.364
PCRNtm	Fatty acid oxidation	pcrn[c] -> pcrn[m]	-1328.33
r1260	Fatty acid oxidation	atp[r] + coa[r] + lnlncg[r] -> amp[r] + h[r] + ppi[r] + lnlncgcoa[r]	1776.43
r1400	Fatty acid oxidation	ppcoa[c] + crn[m] -> ppcoa[m] + crn[c]	-1328.32
r1449	Fatty acid oxidation	q10[m] + tdcoa[m] -> q10h2[m] + HC01412[m]	894.489
ELAIDCPT2	Fatty acid oxidation	coa[m] + elaidcrn[m] -> crn[m] + od2coa[m]	-2356.93
VACCCRNt	Fatty acid oxidation	vacccrn[c] -> vacccrn[m]	-2110.43
LNELDCCPT2	Fatty acid oxidation	coa[m] + lneldccrn[m] -> crn[m] + lneldccoa[m]	-553.656
FAOXC2251836m	Fatty acid oxidation	2 h2o[m] + 2 coa[m] + 2 nad[m] + dcsptn1coa[m] -> 2 h[m] + 2 nadh[m] + 2 accoa[m] + lnlncgcoa[m]	2311.31
FAOXC18480m	Fatty acid oxidation	5 h2o[m] + 5 coa[m] + 5 nad[m] + fad[m] + strdnccoa[m] -> 5 h[m] + 5 nadh[m] + 5 accoa[m] + fadh2[m] + occoa[m]	1546.95
ARACHCRNt	Fatty acid oxidation	arachcrn[c] -> arachcrn[m]	2003.52
C180CPT1	Fatty acid oxidation	crn[c] + stcoa[c] -> coa[c] + stcrn[c]	-696.266
C181CPT2	Fatty acid oxidation	coa[m] + odecrn[m] -> crn[m] + odecoa[m]	-1648.65
C204CPT1	Fatty acid oxidation	crn[c] + arachdcoa[c] -> coa[c] + arachdcrn[c]	907.71
FACOAL203	Fatty acid oxidation	atp[c] + coa[c] + dlnlcg[c] -> amp[c] + ppi[c] + dlnlcgcoa[c]	705.827
RE1521M	Fatty acid oxidation	h2o[m] + CE2432[m] <=> CE2417[m]	-557.874
DESAT22_1p	Fatty acid synthesis	h[x] + nadh[x] + o2[x] + adrncoa[x] -> nad[x] + 2 h2o[x] + dcsptn1coa[x]	-657.616
FAS160COA	Fatty acid synthesis	3 h[c] + 2 nadph[c] + malcoa[c] + tdcoa[c] -> h2o[c] + 2 nadp[c] + co2[c] + coa[c] + pmtcoa[c]	-1427.96
FAS180COA	Fatty acid synthesis	3 h[c] + 2 nadph[c] + malcoa[c] + pmtcoa[c] -> h2o[c] + 2 nadp[c] + co2[c] + coa[c] + stcoa[c]	961.418
RE0344C	Fatty acid synthesis	h2o[c] + stcoa[c] <=> h[c] + coa[c] + ocdca[c]	646.046
RE0577C	Fatty acid synthesis	h2o[c] + arachcoa[c] <=> h[c] + coa[c] + arach[c]	646.499
RE3241C	Fatty acid synthesis	h[c] + malcoa[c] + HC10852[c] -> co2[c] + coa[c] + CE5160[c]	1259.94
RE3245C	Fatty acid synthesis	h2o[c] + odecoa[c] <=> h[c] + coa[c] + ocdcea[c]	646.546
MTHFC	Folate metabolism	h2o[c] + methf[c] <=> 10fthf[c] + h[c]	-1096.53
MTHFR3	Folate metabolism	2 h[c] + nadph[c] + mlthf[c] -> nadp[c] + 5mthf[c]	731.71
MTHFD2m	Folate metabolism	nad[m] + mlthf[m] <=> nadh[m] + methf[m]	1277.53
GLNS	Glutamate metabolism	nh4[c] + atp[c] + 2 h[c] + glu_L[c] -> adp[c] + pi[c] + gln_L[c]	711.307
GLUDxm	Glutamate metabolism	h2o[m] + nad[m] + glu_L[m] <=> h[m] + akg[m] + nadh[m] + nh4[m]	1277.41
GTHOm	Glutamate metabolism	h[m] + nadph[m] + gthox[m] -> nadp[m] + 2 gthrd[m]	557.884
r0022	Glutathione metabolism	nad[m] + 2 gthrd[m] <=> h[m] + nadh[m] + gthox[m]	719.643
PAFS	Glycerophospholipid metabolism	accoa[c] + ak2lgchol_hs[c] -> coa[c] + paf_hs[c]	1411.65
PLA2_2	Glycerophospholipid metabolism	h2o[c] + pchol_hs[c] -> h[c] + Rtotal2[c] + lpchol_hs[c]	-1017.42
G3PD1	Glycerophospholipid metabolism	nad[c] + glyc3p[c] <=> h[c] + nadh[c] + dhap[c]	745.168
GLYK	Glycerophospholipid metabolism	atp[c] + 2 h[c] + glyc[c] -> adp[c] + glyc3p[c]	-1097.99
GHMT2r	Glycine, serine, alanine and threonine metabolism	thf[c] + ser_L[c] <=> h2o[c] + gly[c] + mlthf[c]	1785.16
OBDHc	Glycine, serine, alanine and threonine metabolism	nad[c] + 2obut[c] + coa[c] -> nadh[c] + co2[c] + ppcoa[c]	-1257.32
ACS	Glycolysis/gluconeogenesis	atp[c] + coa[c] + ac[c] -> amp[c] + ppi[c] + accoa[c]	-763.91
PGM	Glycolysis/gluconeogenesis	2pg[c] <=> 3pg[c]	676.952
PDHm	Glycolysis/gluconeogenesis	coa[m] + nad[m] + pyr[m] -> co2[m] + nadh[m] + accoa[m]	-718.891
PGI	Glycolysis/gluconeogenesis	g6p[c] <=> f6p[c]	-793.196
RE3630C	Histidine metabolism	h2o[c] + CE2088[c] <=> ac[c] + CE2089[c]	1411.31
SULFOX	Methionine and cysteine metabolism	h2o[c] + so3[c] + 2 ficytC[m] -> 2 h[c] + 2 focytC[m] + so4[c]	887.93
ALCD1	Miscellaneous	nad[c] + meoh[c] <=> h[c] + nadh[c] + fald[c]	-595.644
r0584	NAD metabolism	h2o[c] + dnad[c] <=> 2 h[c] + amp[c] + nicrnt[c]	-838.193
ATPS4m	Oxidative phosphorylation	5 h[c] + adp[m] + pi[m] -> 3 h[m] + h2o[m] + atp[m]	-579.653
PPA	Oxidative phosphorylation	h2o[c] + ppi[c] -> h[c] + 2 pi[c]	-1323.83
PPM	Pentose phosphate pathway	r1p[c] <=> r5p[c]	625.321
ACCOAL	Propanoate metabolism	atp[c] + 3 h[c] + coa[c] + ppa[c] -> adp[c] + pi[c] + ppcoa[c]	-575.057
ADA	Purine catabolism	h2o[c] + h[c] + adn[c] -> nh4[c] + ins[c]	-1168.74
PUNP4	Purine catabolism	pi[c] + dgsn[c] <=> 2dr1p[c] + gua[c]	-598.425
r0028	Purine catabolism	h2o[c] + adp[c] -> 4 h[c] + pi[c] + amp[c]	-763.677
NTD1	Pyrimidine catabolism	h2o[c] + dump[c] -> pi[c] + duri[c]	947.12
NTD3	Pyrimidine catabolism	h2o[c] + dcmp[c] -> pi[c] + dcyt[c]	948.714
r0377	Pyrimidine catabolism	atp[c] + 2 h[c] + dcyt[c] -> adp[c] + dcmp[c]	-862.958
ME1m	Pyruvate metabolism	nad[m] + mal_L[m] -> co2[m] + nadh[m] + pyr[m]	1277.08
ARTCOAL1	R group synthesis	h2o[c] + Rtotalcoa[c] -> h[c] + coa[c] + Rtotal[c]	-779.213
ARTCOAL2	R group synthesis	h2o[c] + Rtotal2coa[c] -> h[c] + coa[c] + Rtotal2[c]	-613.472
r0787	Sphingolipid metabolism	h2o[c] + sph1p[c] -> pi[c] + sphgn[c]	-761.338
SLCBK1	Sphingolipid metabolism	atp[c] + 2 h[c] + sphgn[c] -> adp[c] + sph1p[c]	847.253
DHPR	Tetrahydrobiopterin metabolism	h[c] + nadh[c] + dhbpt[c] -> nad[c] + thbpt[c]	4841.78
DHPR2	Tetrahydrobiopterin metabolism	5mthf[c] + dhbpt[c] -> h[c] + thbpt[c] + mlthf[c]	9272.58
r0399	Tetrahydrobiopterin metabolism	o2[c] + thbpt[c] + phe_L[c] -> h2o[c] + dhbpt[c] + tyr_L[c]	6809.18
HACD1m	Tryptophan metabolism	h[m] + nadh[m] + aacoa[m] <=> nad[m] + 3hbcoa[m]	575.83
R_group_phosphotase_1	Unassigned	atp[c] + coa[c] + Rtotal[c] -> amp[c] + ppi[c] + Rtotalcoa[c]	1425.38
R_group_phosphotase_2	Unassigned	atp[c] + coa[c] + Rtotal2[c] -> amp[c] + ppi[c] + Rtotal2coa[c]	1260.72
R_group_phosphotase_3	Unassigned	atp[c] + coa[c] + Rtotal3[c] -> amp[c] + ppi[c] + Rtotal3coa[c]	646.55
r0603	Valine, leucine, and isoleucine metabolism	2mbcoa[m] + q10[m] -> 2mb2coa[m] + q10h2[m]	-572.873
MMTSADm	Valine, leucine, and isoleucine metabolism	coa[m] + nad[m] + 2mop[m] -> h[m] + nadh[m] + mmcoa_R[m]	1057.82
LRAT2	Vitamin A metabolism	pchol_hs[c] + retinol_9_cis[c] -> lpchol_hs[c] + 9_cis_retfa[c]	-876.094
RETH2	Vitamin A metabolism	h2o[c] + 11_cis_retfa[c] -> h[c] + Rtotal2[c] + retinol_cis_11[c]	-893.21
ADK3	Nucleotide interconversion	3 h[c] + amp[c] + gtp[c] <=> adp[c] + gdp[c]	1301.13
AMPDA	Nucleotide interconversion	h2o[c] + h[c] + amp[c] -> nh4[c] + imp[c]	-608.709
BPNT	Nucleotide interconversion	h2o[c] + pap[c] -> pi[c] + amp[c]	567.534
CTPS1	Nucleotide interconversion	nh4[c] + atp[c] + h[c] + utp[c] -> adp[c] + pi[c] + ctp[c]	624.443
CYTK3	Nucleotide interconversion	gtp[c] + cmp[c] <=> gdp[c] + cdp[c]	1348.9
CYTK4	Nucleotide interconversion	gtp[c] + dcmp[c] <=> gdp[c] + dcdp[c]	923.644
DURIK1	Nucleotide interconversion	atp[c] + 2 h[c] + duri[c] -> adp[c] + dump[c]	-860.779
GK1	Nucleotide interconversion	atp[c] + 3 h[c] + gmp[c] <=> adp[c] + gdp[c]	1947.01
NDPK2	Nucleotide interconversion	atp[c] + 3 h[c] + udp[c] <=> adp[c] + utp[c]	844.059
NDPK5	Nucleotide interconversion	atp[c] + 3 h[c] + dgdp[c] <=> adp[c] + dgtp[c]	-559.995
NDPK6	Nucleotide interconversion	atp[c] + 3 h[c] + dudp[c] <=> adp[c] + dutp[c]	1933.79
NTD7	Nucleotide interconversion	h2o[c] + amp[c] -> pi[c] + adn[c]	646.484
PUNP1	Nucleotide interconversion	pi[c] + adn[c] <=> ade[c] + r1p[c]	-625.591
TRDR	Nucleotide interconversion	h[c] + nadph[c] + trdox[c] -> nadp[c] + trdrd[c]	-599.684
r0475	Nucleotide interconversion	h2o[c] + dutp[c] + trdox[c] <=> utp[c] + trdrd[c]	-1089.74
ADK3m	Nucleotide interconversion	amp[m] + gtp[m] <=> adp[m] + gdp[m]	835.38
ADNK1	Nucleotide interconversion	atp[c] + 2 h[c] + adn[c] -> adp[c] + amp[c]	-560.184
CYTK1	Nucleotide interconversion	atp[c] + 3 h[c] + cmp[c] <=> adp[c] + cdp[c]	897.983
CYTK10	Nucleotide interconversion	cmp[c] + dgtp[c] <=> cdp[c] + dgdp[c]	1457.97
CYTK11	Nucleotide interconversion	dgtp[c] + dcmp[c] <=> dgdp[c] + dcdp[c]	1032.72
CYTK8	Nucleotide interconversion	datp[c] + cmp[c] <=> dadp[c] + cdp[c]	868.378
CYTK9	Nucleotide interconversion	cmp[c] + dctp[c] <=> cdp[c] + dcdp[c]	868.378
UMPK3	Nucleotide interconversion	utp[c] + ump[c] <=> 2 udp[c]	-814.455
UMPK7	Nucleotide interconversion	dgtp[c] + ump[c] <=> udp[c] + dgdp[c]	589.601
NTD7e	Nucleotide interconversion	h2o[e] + amp[e] -> adn[e] + pi[e]	946.039
EX_11_cis_retfa(e)	Exchange/demand reaction	11_cis_retfa[e] <=>	-895.661
EX_adprib(e)	Exchange/demand reaction	adprib[e] <=>	-819.579
EX_arab_L(e)	Exchange/demand reaction	arab_L[e] <=>	914.089
EX_co2(e)	Exchange/demand reaction	co2[e] <=>	-776.206
EX_cyan(e)	Exchange/demand reaction	cyan[e] <=>	1079.54
EX_cys_L(e)	Exchange/demand reaction	cys_L[e] <=	-780.911
EX_cytd(e)	Exchange/demand reaction	cytd[e] <=	956.528
EX_dag_hs(e)	Exchange/demand reaction	dag_hs[e] <=	-813.207
EX_elaid(e)	Exchange/demand reaction	elaid[e] <=>	-1886.78
EX_fol(e)	Exchange/demand reaction	fol[e] <=	3089.19
EX_gly(e)	Exchange/demand reaction	gly[e] <=	-667.202
EX_gsn(e)	Exchange/demand reaction	gsn[e] <=	1617.64
EX_lneldc(e)	Exchange/demand reaction	lneldc[e] <=>	-2304.31
EX_lnlc(e)	Exchange/demand reaction	lnlc[e] <=>	-2006.63
EX_nadp(e)	Exchange/demand reaction	nadp[e] <=>	804.714
EX_ocdca(e)	Exchange/demand reaction	ocdca[e] <=	-1922.48
EX_ocdcea(e)	Exchange/demand reaction	ocdcea[e] <=>	-2352.63
EX_pchol_hs(e)	Exchange/demand reaction	pchol_hs[e] <=>	-544.498
EX_pi(e)	Exchange/demand reaction	pi[e] <=>	-1231.5
EX_Rtotal(e)	Exchange/demand reaction	Rtotal[e] <=>	-1391.64
EX_Rtotal2(e)	Exchange/demand reaction	Rtotal2[e] <=>	-1358.74
EX_ser_L(e)	Exchange/demand reaction	ser_L[e] <=>	3623.73
EX_strdnc(e)	Exchange/demand reaction	strdnc[e] <=>	-1807.27
EX_ttdca(e)	Exchange/demand reaction	ttdca[e] <=	-1569
EX_urate(e)	Exchange/demand reaction	urate[e] <=>	571.459
EX_uri(e)	Exchange/demand reaction	uri[e] <=>	815.731
EX_utp(e)	Exchange/demand reaction	utp[e] <=>	-890.275
EX_vacc(e)	Exchange/demand reaction	vacc[e] <=>	-2211.57
EX_xylt(e)	Exchange/demand reaction	xylt[e] <=	539.584
EX_gmp(e)	Exchange/demand reaction	gmp[e] <=>	788.487
EX_thf(e)	Exchange/demand reaction	thf[e] <=>	884.113
PIter	Transport, endoplasmic reticular	pi[r] <=> pi[c]	-761.105
r0908	Transport, endoplasmic reticular	acgam[c] <=> acgam[r]	1323.87
r1024	Transport, endoplasmic reticular	h2o[r] + atp[r] + xol7aone[r] -> xol7aone[c] + adp[r] + 2 h[r] + pi[r]	1237.87
ABTti	Transport, extracellular	abt[c] -> abt[e]	1087.87
ACACt2	Transport, extracellular	h[e] + acac[e] <=> h[c] + acac[c]	-1714.21
ALAtN1	Transport, extracellular	h[c] + 2 na1[e] + ala_L[e] <=> h[e] + 2 na1[c] + ala_L[c]	-544.929
ARACHDt2	Transport, extracellular	arachd[e] <=> arachd[c]	607.699
ARACHt	Transport, extracellular	arach[e] <=> arach[c]	-608.458
DAGt	Transport, extracellular	dag_hs[e] <=> dag_hs[c]	-1017.17
FATP1t	Transport, extracellular	na1[c] + hdca[c] <=> na1[e] + hdca[e]	-1074.9
GUAt	Transport, extracellular	gua[e] <=> gua[c]	-691.858
HDCAtr	Transport, extracellular	hdca[e] <=> hdca[c]	1161.77
HDCEAtr	Transport, extracellular	hdcea[e] <=> hdcea[c]	707.086
INSt	Transport, extracellular	ins[e] <=> ins[c]	-1178.23
L_LACt4r	Transport, extracellular	na1[e] + lac_L[e] <=> na1[c] + lac_L[c]	-805.683
LNLNCAt	Transport, extracellular	lnlnca[e] <=> lnlnca[c]	1709.35
RTOTAL2t	Transport, extracellular	Rtotal2[e] <=> Rtotal2[c]	-2048.56
RTOTALt	Transport, extracellular	Rtotal[e] <=> Rtotal[c]	-1426.63
SERt4	Transport, extracellular	na1[e] + ser_L[e] -> na1[c] + ser_L[c]	2587.62
SERtN1	Transport, extracellular	h[c] + 2 na1[e] + ser_L[e] <=> h[e] + 2 na1[c] + ser_L[c]	2051.43
r1673	Transport, extracellular	na1[e] + gln_L[c] + gly[e] -> na1[c] + gln_L[e] + gly[c]	-1001.38
r1674	Transport, extracellular	na1[e] + gly[e] + ser_L[c] -> na1[c] + gly[c] + ser_L[e]	-3058.46
r1678	Transport, extracellular	na1[e] + gly[e] + tyr_L[c] -> na1[c] + gly[c] + tyr_L[e]	-3145.28
r1681	Transport, extracellular	na1[e] + gly[e] + pro_L[c] -> na1[c] + gly[c] + pro_L[e]	-914.671
r1683	Transport, extracellular	na1[e] + gly[e] + val_L[c] -> na1[c] + gly[c] + val_L[e]	-618.143
r1684	Transport, extracellular	na1[e] + gly[e] + thr_L[c] -> na1[c] + gly[c] + thr_L[e]	-618.109
r1685	Transport, extracellular	na1[e] + gly[e] + hom_L[c] -> na1[c] + gly[c] + hom_L[e]	-548.94
r1686	Transport, extracellular	na1[e] + gly[e] + ile_L[c] -> na1[c] + gly[c] + ile_L[e]	-635.818
r1693	Transport, extracellular	na1[e] + ala_L[e] + tyr_L[c] -> na1[c] + ala_L[c] + tyr_L[e]	-2770.1
r1702	Transport, extracellular	na1[e] + gln_L[e] + gly[c] -> na1[c] + gln_L[c] + gly[e]	827.672
r1705	Transport, extracellular	na1[e] + gln_L[e] + met_L[c] -> na1[c] + gln_L[c] + met_L[e]	827.703
r1706	Transport, extracellular	na1[e] + gln_L[e] + trp_L[c] -> na1[c] + gln_L[c] + trp_L[e]	914.553
r1707	Transport, extracellular	na1[e] + gln_L[e] + phe_L[c] -> na1[c] + gln_L[c] + phe_L[e]	914.602
r1708	Transport, extracellular	na1[e] + gln_L[e] + tyr_L[c] -> na1[c] + gln_L[c] + tyr_L[e]	-2230.75
r1717	Transport, extracellular	na1[e] + gly[c] + ser_L[e] -> na1[c] + gly[e] + ser_L[c]	2884.67
r1720	Transport, extracellular	na1[e] + ser_L[e] + met_L[c] -> na1[c] + ser_L[c] + met_L[e]	2884.7
r1721	Transport, extracellular	na1[e] + ser_L[e] + trp_L[c] -> na1[c] + ser_L[c] + trp_L[e]	2971.53
r1722	Transport, extracellular	na1[e] + ser_L[e] + phe_L[c] -> na1[c] + ser_L[c] + phe_L[e]	2971.49
r1725	Transport, extracellular	na1[e] + ser_L[e] + leu_L[c] -> na1[c] + ser_L[c] + leu_L[e]	2440.2
r1726	Transport, extracellular	na1[e] + ser_L[e] + pro_L[c] -> na1[c] + ser_L[c] + pro_L[e]	2056.99
r1728	Transport, extracellular	na1[e] + ser_L[e] + val_L[c] -> na1[c] + ser_L[c] + val_L[e]	2353.42
r1730	Transport, extracellular	na1[e] + ser_L[e] + hom_L[c] -> na1[c] + ser_L[c] + hom_L[e]	2422.61
r1731	Transport, extracellular	na1[e] + ser_L[e] + ile_L[c] -> na1[c] + ser_L[c] + ile_L[e]	2335.73
r1734	Transport, extracellular	na1[e] + gln_L[c] + met_L[e] -> na1[c] + gln_L[e] + met_L[c]	-1001.46
r1735	Transport, extracellular	na1[e] + ser_L[c] + met_L[e] -> na1[c] + ser_L[e] + met_L[c]	-3058.47
r1738	Transport, extracellular	na1[e] + met_L[e] + tyr_L[c] -> na1[c] + met_L[c] + tyr_L[e]	-3145.34
r1741	Transport, extracellular	na1[e] + met_L[e] + pro_L[c] -> na1[c] + met_L[c] + pro_L[e]	-914.432
r1743	Transport, extracellular	na1[e] + met_L[e] + val_L[c] -> na1[c] + met_L[c] + val_L[e]	-618.133
r1744	Transport, extracellular	na1[e] + thr_L[c] + met_L[e] -> na1[c] + thr_L[e] + met_L[c]	-618.129
r1745	Transport, extracellular	na1[e] + met_L[e] + hom_L[c] -> na1[c] + met_L[c] + hom_L[e]	-548.975
r1746	Transport, extracellular	na1[e] + met_L[e] + ile_L[c] -> na1[c] + met_L[c] + ile_L[e]	-635.829
r1748	Transport, extracellular	na1[e] + ala_L[c] + trp_L[e] -> na1[c] + ala_L[e] + trp_L[c]	-548.899
r1749	Transport, extracellular	na1[e] + gln_L[c] + trp_L[e] -> na1[c] + gln_L[e] + trp_L[c]	-1088.24
r1750	Transport, extracellular	na1[e] + ser_L[c] + trp_L[e] -> na1[c] + ser_L[e] + trp_L[c]	-3145.28
r1753	Transport, extracellular	na1[e] + trp_L[e] + tyr_L[c] -> na1[c] + tyr_L[e] + trp_L[c]	-3232.15
r1755	Transport, extracellular	na1[e] + trp_L[e] + leu_L[c] -> na1[c] + leu_L[e] + trp_L[c]	-618.289
r1756	Transport, extracellular	na1[e] + trp_L[e] + pro_L[c] -> na1[c] + pro_L[e] + trp_L[c]	-1001.48
r1757	Transport, extracellular	na1[e] + asn_L[c] + trp_L[e] -> na1[c] + asn_L[e] + trp_L[c]	-618.116
r1758	Transport, extracellular	na1[e] + trp_L[e] + val_L[c] -> na1[c] + val_L[e] + trp_L[c]	-704.971
r1759	Transport, extracellular	na1[e] + thr_L[c] + trp_L[e] -> na1[c] + thr_L[e] + trp_L[c]	-704.958
r1760	Transport, extracellular	na1[e] + trp_L[e] + hom_L[c] -> na1[c] + hom_L[e] + trp_L[c]	-635.782
r1761	Transport, extracellular	na1[e] + trp_L[e] + ile_L[c] -> na1[c] + ile_L[e] + trp_L[c]	-722.682
r1763	Transport, extracellular	na1[e] + ala_L[c] + phe_L[e] -> na1[c] + ala_L[e] + phe_L[c]	-548.899
r1764	Transport, extracellular	na1[e] + gln_L[c] + phe_L[e] -> na1[c] + gln_L[e] + phe_L[c]	-1088.27
r1765	Transport, extracellular	na1[e] + ser_L[c] + phe_L[e] -> na1[c] + ser_L[e] + phe_L[c]	-3145.24
r1768	Transport, extracellular	na1[e] + phe_L[e] + tyr_L[c] -> na1[c] + tyr_L[e] + phe_L[c]	-3232.13
r1770	Transport, extracellular	na1[e] + phe_L[e] + leu_L[c] -> na1[c] + leu_L[e] + phe_L[c]	-618.207
r1771	Transport, extracellular	na1[e] + phe_L[e] + pro_L[c] -> na1[c] + pro_L[e] + phe_L[c]	-1001.35
r1772	Transport, extracellular	na1[e] + asn_L[c] + phe_L[e] -> na1[c] + asn_L[e] + phe_L[c]	-618.106
r1773	Transport, extracellular	na1[e] + phe_L[e] + val_L[c] -> na1[c] + val_L[e] + phe_L[c]	-704.975
r1774	Transport, extracellular	na1[e] + thr_L[c] + phe_L[e] -> na1[c] + thr_L[e] + phe_L[c]	-704.968
r1775	Transport, extracellular	na1[e] + phe_L[e] + hom_L[c] -> na1[c] + hom_L[e] + phe_L[c]	-635.787
r1776	Transport, extracellular	na1[e] + phe_L[e] + ile_L[c] -> na1[c] + ile_L[e] + phe_L[c]	-722.647
r1777	Transport, extracellular	na1[e] + gly[c] + tyr_L[e] -> na1[c] + gly[e] + tyr_L[c]	2971.48
r1778	Transport, extracellular	na1[e] + ala_L[c] + tyr_L[e] -> na1[c] + ala_L[e] + tyr_L[c]	2596.35
r1779	Transport, extracellular	na1[e] + gln_L[c] + tyr_L[e] -> na1[c] + gln_L[e] + tyr_L[c]	2057.02
r1781	Transport, extracellular	na1[e] + met_L[c] + tyr_L[e] -> na1[c] + met_L[e] + tyr_L[c]	2971.54
r1782	Transport, extracellular	na1[e] + tyr_L[e] + trp_L[c] -> na1[c] + trp_L[e] + tyr_L[c]	3058.34
r1783	Transport, extracellular	na1[e] + tyr_L[e] + phe_L[c] -> na1[c] + phe_L[e] + tyr_L[c]	3058.35
r1784	Transport, extracellular	na1[e] + cys_L[c] + tyr_L[e] -> na1[c] + cys_L[e] + tyr_L[c]	2971.49
r1785	Transport, extracellular	na1[e] + tyr_L[e] + leu_L[c] -> na1[c] + leu_L[e] + tyr_L[c]	2527
r1786	Transport, extracellular	na1[e] + tyr_L[e] + pro_L[c] -> na1[c] + pro_L[e] + tyr_L[c]	2143.81
r1787	Transport, extracellular	na1[e] + asn_L[c] + tyr_L[e] -> na1[c] + asn_L[e] + tyr_L[c]	2527.19
r1788	Transport, extracellular	na1[e] + tyr_L[e] + val_L[c] -> na1[c] + val_L[e] + tyr_L[c]	2440.31
r1789	Transport, extracellular	na1[e] + thr_L[c] + tyr_L[e] -> na1[c] + thr_L[e] + tyr_L[c]	2440.37
r1790	Transport, extracellular	na1[e] + tyr_L[e] + hom_L[c] -> na1[c] + hom_L[e] + tyr_L[c]	2509.48
r1791	Transport, extracellular	na1[e] + tyr_L[e] + ile_L[c] -> na1[c] + ile_L[e] + tyr_L[c]	2422.58
r1799	Transport, extracellular	na1[e] + cys_L[e] + tyr_L[c] -> na1[c] + cys_L[c] + tyr_L[e]	-3145.19
r1801	Transport, extracellular	na1[e] + cys_L[e] + pro_L[c] -> na1[c] + cys_L[c] + pro_L[e]	-914.463
r1803	Transport, extracellular	na1[e] + cys_L[e] + val_L[c] -> na1[c] + cys_L[c] + val_L[e]	-618.02
r1806	Transport, extracellular	na1[e] + cys_L[e] + ile_L[c] -> na1[c] + cys_L[c] + ile_L[e]	-635.668
r1809	Transport, extracellular	na1[e] + gln_L[c] + leu_L[e] -> na1[c] + gln_L[e] + leu_L[c]	-556.942
r1810	Transport, extracellular	na1[e] + ser_L[c] + leu_L[e] -> na1[c] + ser_L[e] + leu_L[c]	-2613.96
r1814	Transport, extracellular	na1[e] + leu_L[e] + tyr_L[c] -> na1[c] + tyr_L[e] + leu_L[c]	-2700.79
r1822	Transport, extracellular	na1[e] + gly[c] + pro_L[e] -> na1[c] + gly[e] + pro_L[c]	740.835
r1825	Transport, extracellular	na1[e] + ser_L[c] + pro_L[e] -> na1[c] + ser_L[e] + pro_L[c]	-2230.71
r1826	Transport, extracellular	na1[e] + met_L[c] + pro_L[e] -> na1[c] + met_L[e] + pro_L[c]	740.857
r1827	Transport, extracellular	na1[e] + pro_L[e] + trp_L[c] -> na1[c] + trp_L[e] + pro_L[c]	827.676
r1828	Transport, extracellular	na1[e] + pro_L[e] + phe_L[c] -> na1[c] + phe_L[e] + pro_L[c]	827.689
r1829	Transport, extracellular	na1[e] + pro_L[e] + tyr_L[c] -> na1[c] + tyr_L[e] + pro_L[c]	-2317.57
r1830	Transport, extracellular	na1[e] + cys_L[c] + pro_L[e] -> na1[c] + cys_L[e] + pro_L[c]	740.755
r1844	Transport, extracellular	na1[e] + asn_L[e] + tyr_L[c] -> na1[c] + asn_L[c] + tyr_L[e]	-2700.9
r1855	Transport, extracellular	na1[e] + ser_L[c] + val_L[e] -> na1[c] + ser_L[e] + val_L[c]	-2527.03
r1859	Transport, extracellular	na1[e] + val_L[e] + tyr_L[c] -> na1[c] + tyr_L[e] + val_L[c]	-2614.05
r1874	Transport, extracellular	na1[e] + thr_L[e] + tyr_L[c] -> na1[c] + thr_L[c] + tyr_L[e]	-2614.05
r1885	Transport, extracellular	na1[e] + ser_L[c] + hom_L[e] -> na1[c] + ser_L[e] + hom_L[c]	-2596.35
r1889	Transport, extracellular	na1[e] + hom_L[e] + tyr_L[c] -> na1[c] + tyr_L[e] + hom_L[c]	-2683.2
r1900	Transport, extracellular	na1[e] + ser_L[c] + ile_L[e] -> na1[c] + ser_L[e] + ile_L[c]	-2509.45
r1902	Transport, extracellular	na1[e] + ile_L[e] + trp_L[c] -> na1[c] + trp_L[e] + ile_L[c]	548.824
r1903	Transport, extracellular	na1[e] + ile_L[e] + phe_L[c] -> na1[c] + phe_L[e] + ile_L[c]	548.889
r1904	Transport, extracellular	na1[e] + ile_L[e] + tyr_L[c] -> na1[c] + tyr_L[e] + ile_L[c]	-2596.35
r1915	Transport, extracellular	na1[e] + gly[e] + his_L[c] -> na1[c] + gly[c] + his_L[e]	-623.018
r1916	Transport, extracellular	na1[e] + gly[e] + citr_L[c] -> na1[c] + gly[c] + citr_L[e]	-914.584
r1924	Transport, extracellular	na1[e] + orn[c] + gln_L[e] -> na1[c] + gln_L[c] + orn[e]	914.546
r1928	Transport, extracellular	na1[e] + ser_L[e] + arg_L[c] -> na1[c] + ser_L[c] + arg_L[e]	2435.38
r1929	Transport, extracellular	na1[e] + orn[c] + ser_L[e] -> na1[c] + ser_L[c] + orn[e]	2971.54
r1930	Transport, extracellular	na1[e] + ser_L[e] + his_L[c] -> na1[c] + ser_L[c] + his_L[e]	2348.54
r1931	Transport, extracellular	na1[e] + ser_L[e] + citr_L[c] -> na1[c] + ser_L[c] + citr_L[e]	2056.96
r1935	Transport, extracellular	na1[e] + met_L[e] + his_L[c] -> na1[c] + met_L[c] + his_L[e]	-623.033
r1936	Transport, extracellular	na1[e] + citr_L[c] + met_L[e] -> na1[c] + met_L[c] + citr_L[e]	-914.596
r1937	Transport, extracellular	na1[e] + lys_L[c] + trp_L[e] -> na1[c] + lys_L[e] + trp_L[c]	-557.687
r1938	Transport, extracellular	na1[e] + arg_L[c] + trp_L[e] -> na1[c] + arg_L[e] + trp_L[c]	-623.025
r1940	Transport, extracellular	na1[e] + trp_L[e] + his_L[c] -> na1[c] + his_L[e] + trp_L[c]	-709.869
r1941	Transport, extracellular	na1[e] + citr_L[c] + trp_L[e] -> na1[c] + trp_L[c] + citr_L[e]	-1001.44
r1942	Transport, extracellular	na1[e] + lys_L[c] + phe_L[e] -> na1[c] + lys_L[e] + phe_L[c]	-557.69
r1943	Transport, extracellular	na1[e] + arg_L[c] + phe_L[e] -> na1[c] + arg_L[e] + phe_L[c]	-623.021
r1945	Transport, extracellular	na1[e] + phe_L[e] + his_L[c] -> na1[c] + his_L[e] + phe_L[c]	-709.866
r1946	Transport, extracellular	na1[e] + citr_L[c] + phe_L[e] -> na1[c] + phe_L[c] + citr_L[e]	-1001.43
r1947	Transport, extracellular	na1[e] + lys_L[c] + tyr_L[e] -> na1[c] + lys_L[e] + tyr_L[c]	2587.58
r1948	Transport, extracellular	na1[e] + arg_L[c] + tyr_L[e] -> na1[c] + arg_L[e] + tyr_L[c]	2522.26
r1949	Transport, extracellular	na1[e] + orn[c] + tyr_L[e] -> na1[c] + orn[e] + tyr_L[c]	3058.41
r1950	Transport, extracellular	na1[e] + tyr_L[e] + his_L[c] -> na1[c] + his_L[e] + tyr_L[c]	2435.41
r1951	Transport, extracellular	na1[e] + citr_L[c] + tyr_L[e] -> na1[c] + tyr_L[c] + citr_L[e]	2143.85
r1955	Transport, extracellular	na1[e] + cys_L[e] + his_L[c] -> na1[c] + cys_L[c] + his_L[e]	-622.936
r1964	Transport, extracellular	na1[e] + orn[c] + pro_L[e] -> na1[c] + orn[e] + pro_L[c]	827.7
r1989	Transport, extracellular	na1[e] + orn[c] + ile_L[e] -> na1[c] + orn[e] + ile_L[c]	548.922
r1995	Transport, extracellular	ser_L[c] + lys_L[e] -> ser_L[e] + lys_L[c]	-2587.57
r1999	Transport, extracellular	lys_L[e] + tyr_L[c] -> lys_L[c] + tyr_L[e]	-2674.45
r2011	Transport, extracellular	ser_L[c] + arg_L[e] -> ser_L[e] + arg_L[c]	-2522.25
r2015	Transport, extracellular	arg_L[e] + tyr_L[c] -> arg_L[c] + tyr_L[e]	-2609.12
r2026	Transport, extracellular	gln_L[c] + orn[e] -> orn[c] + gln_L[e]	-1001.42
r2027	Transport, extracellular	ser_L[c] + orn[e] -> orn[c] + ser_L[e]	-3058.42
r2031	Transport, extracellular	orn[e] + tyr_L[c] -> orn[c] + tyr_L[e]	-3145.29
r2034	Transport, extracellular	orn[e] + pro_L[c] -> orn[c] + pro_L[e]	-914.571
r2036	Transport, extracellular	orn[e] + val_L[c] -> orn[c] + val_L[e]	-618.122
r2037	Transport, extracellular	thr_L[c] + orn[e] -> orn[c] + thr_L[e]	-618.104
r2038	Transport, extracellular	orn[e] + hom_L[c] -> orn[c] + hom_L[e]	-548.946
r2039	Transport, extracellular	orn[e] + ile_L[c] -> orn[c] + ile_L[e]	-635.798
r2043	Transport, extracellular	ser_L[c] + his_L[e] -> ser_L[e] + his_L[c]	-2435.41
r2045	Transport, extracellular	his_L[e] + trp_L[c] -> trp_L[e] + his_L[c]	622.994
r2046	Transport, extracellular	his_L[e] + phe_L[c] -> phe_L[e] + his_L[c]	622.987
r2047	Transport, extracellular	his_L[e] + tyr_L[c] -> tyr_L[e] + his_L[c]	-2522.27
r2056	Transport, extracellular	gly[c] + citr_L[e] -> gly[e] + citr_L[c]	827.722
r2059	Transport, extracellular	ser_L[c] + citr_L[e] -> ser_L[e] + citr_L[c]	-2143.85
r2060	Transport, extracellular	met_L[c] + citr_L[e] -> citr_L[c] + met_L[e]	827.726
r2061	Transport, extracellular	trp_L[c] + citr_L[e] -> citr_L[c] + trp_L[e]	914.565
r2062	Transport, extracellular	phe_L[c] + citr_L[e] -> citr_L[c] + phe_L[e]	914.565
r2063	Transport, extracellular	tyr_L[c] + citr_L[e] -> citr_L[c] + tyr_L[e]	-2230.71
r2064	Transport, extracellular	cys_L[c] + citr_L[e] -> cys_L[e] + citr_L[c]	827.634
PIt8	Transport, extracellular	1.5 na1[e] + pi[e] <=> pi[c] + 1.5 na1[c]	-691.487
5MTHFt2	Transport, extracellular	h2o[c] + 5mthf[e] <=> h2o[e] + 5mthf[c]	631.881
ALAGLNNaEx	Transport, extracellular	na1[e] + ala_L[e] + gln_L[c] -> na1[c] + ala_L[c] + gln_L[e]	-626.215
ALASERNaEx	Transport, extracellular	na1[e] + ala_L[e] + ser_L[c] -> na1[c] + ala_L[c] + ser_L[e]	-2683.25
ASNGLNNaEx	Transport, extracellular	na1[e] + asn_L[e] + gln_L[c] -> na1[c] + asn_L[c] + gln_L[e]	-557.04
ASNSERNaEx	Transport, extracellular	na1[e] + asn_L[e] + ser_L[c] -> na1[c] + asn_L[c] + ser_L[e]	-2614.07
BILDGLCURte	Transport, extracellular	h2o[c] + atp[c] + bildglcur[c] -> adp[c] + h[c] + pi[c] + bildglcur[e]	-1113.15
CLHCO3tex2	Transport, extracellular	hco3[c] + 2 cl[e] -> hco3[e] + 2 cl[c]	-660.835
CLOXAtex2	Transport, extracellular	2 cl[e] + oxa[c] -> 2 cl[c] + oxa[e]	-689.783
CYSGLNNaEx	Transport, extracellular	na1[e] + cys_L[e] + gln_L[c] -> na1[c] + cys_L[c] + gln_L[e]	-1001.37
CYSSERNaEx	Transport, extracellular	na1[e] + cys_L[e] + ser_L[c] -> na1[c] + cys_L[c] + ser_L[e]	-3058.3
CYSTHRNaEx	Transport, extracellular	na1[e] + cys_L[e] + thr_L[c] -> na1[c] + cys_L[c] + thr_L[e]	-618.052
GLNCYSNaEx	Transport, extracellular	na1[e] + cys_L[c] + gln_L[e] -> na1[c] + cys_L[e] + gln_L[c]	827.617
GLNSERNaEx	Transport, extracellular	na1[e] + gln_L[e] + ser_L[c] -> na1[c] + gln_L[c] + ser_L[e]	-2143.85
SERALANaEx	Transport, extracellular	na1[e] + ala_L[c] + ser_L[e] -> na1[c] + ala_L[e] + ser_L[c]	2509.54
SERASNNaEx	Transport, extracellular	na1[e] + asn_L[c] + ser_L[e] -> na1[c] + asn_L[e] + ser_L[c]	2440.28
SERCYSNaEx	Transport, extracellular	na1[e] + cys_L[c] + ser_L[e] -> na1[c] + cys_L[e] + ser_L[c]	2884.61
SERGLNNaEx	Transport, extracellular	na1[e] + gln_L[c] + ser_L[e] -> na1[c] + gln_L[e] + ser_L[c]	1970.1
SERTHRNaEx	Transport, extracellular	na1[e] + ser_L[e] + thr_L[c] -> na1[c] + ser_L[c] + thr_L[e]	2353.41
THRSERNaEx	Transport, extracellular	na1[e] + ser_L[c] + thr_L[e] -> na1[c] + ser_L[e] + thr_L[c]	-2527.18
PROt2r	Transport, extracellular	h[e] + pro_L[e] <=> h[c] + pro_L[c]	980.067
ALADGLNexR	Transport, extracellular	ala_D[e] + gln_L[c] <=> ala_D[c] + gln_L[e]	-1063.08
BILDGLCURt	Transport, extracellular	hco3[c] + bildglcur[e] <=> hco3[e] + bildglcur[c]	1208.96
CYSGLUexR	Transport, extracellular	cys_L[e] + gln_L[c] <=> cys_L[c] + gln_L[e]	-914.474
INSt4	Transport, extracellular	na1[e] + ins[e] -> na1[c] + ins[c]	-1265.1
SERDGLYexR	Transport, extracellular	gly[c] + ser_D[e] <=> gly[e] + ser_D[c]	914.56
SERGLNexR	Transport, extracellular	gln_L[c] + ser_L[e] <=> gln_L[e] + ser_L[c]	2056.99
SERGLYexR	Transport, extracellular	gly[c] + ser_L[e] <=> gly[e] + ser_L[c]	2971.55
THYOXt	Transport, extracellular	hco3[c] + thyox_L[e] <=> hco3[e] + thyox_L[c]	813.559
TYRt4	Transport, extracellular	na1[e] + tyr_L[e] -> na1[c] + tyr_L[c]	2674.52
ACGAMtly	Transport, lysosomal	acgam[l] -> acgam[c]	-1323.87
ACALDtm	Transport, mitochondrial	acald[m] <=> acald[c]	659.647
ACRNtm	Transport, mitochondrial	acrn[c] -> acrn[m]	-1329.57
ACt2m	Transport, mitochondrial	h[c] + ac[c] <=> h[m] + ac[m]	-1378.79
ASPGLUm	Transport, mitochondrial	h[c] + glu_L[c] + asp_L[m] -> h[m] + glu_L[m] + asp_L[c]	1309.99
ATPtm	Transport, mitochondrial	adp[c] + atp[m] -> atp[c] + 4 h[c] + adp[m]	-548.273
CO2tm	Transport, mitochondrial	co2[c] <=> co2[m]	-923.212
COAtm	Transport, mitochondrial	coa[c] <=> coa[m]	-2656.67
CRNtim	Transport, mitochondrial	crn[m] -> crn[c]	1328.32
OCCOAtm	Transport, mitochondrial	occoa[c] -> occoa[m]	-1981.06
r0838	Transport, mitochondrial	nh4[c] <=> nh4[m]	561.556
r1291	Transport, mitochondrial	ppcoa[c] <=> ppcoa[m]	-2656.65
r1467	Transport, mitochondrial	odecoa[c] <=> odecoa[m]	-2976.98
r2381	Transport, mitochondrial	h[c] + akg[m] + cit[c] -> h[m] + akg[c] + cit[m]	1082.59
r2382	Transport, mitochondrial	h[c] + cit[c] + succ[m] -> h[m] + cit[m] + succ[c]	1221.02
r2384	Transport, mitochondrial	h[c] + cit[c] + oxa[m] -> h[m] + cit[m] + oxa[c]	1221.04
r2435	Transport, mitochondrial	crn[m] + pmtcrn[c] -> crn[c] + pmtcrn[m]	1700.88
GLU5SAtmc	Transport, mitochondrial	glu5sa[m] <=> glu5sa[c]	810.85
PYRt2m	Transport, mitochondrial	h[c] + pyr[c] -> h[m] + pyr[m]	1092.34
DNDPt11m	Transport, mitochondrial	dadp[c] + dgdp[m] -> dgdp[c] + dadp[m]	1241.55
DNDPt14m	Transport, mitochondrial	dtdp[m] + dudp[c] -> dtdp[c] + dudp[m]	1226.7
DNDPt15m	Transport, mitochondrial	dgdp[m] + dudp[c] -> dgdp[c] + dudp[m]	1274.96
DNDPt22m	Transport, mitochondrial	dtdp[c] + dudp[m] -> dtdp[m] + dudp[c]	-1226.7
DNDPt24m	Transport, mitochondrial	dadp[m] + dtdp[c] -> dadp[c] + dtdp[m]	-1193.28
DNDPt25m	Transport, mitochondrial	dcdp[m] + dtdp[c] -> dcdp[c] + dtdp[m]	-1219.94
DNDPt27m	Transport, mitochondrial	dcdp[c] + dtdp[m] -> dcdp[m] + dtdp[c]	1219.93
DNDPt28m	Transport, mitochondrial	dcdp[c] + dgdp[m] -> dgdp[c] + dcdp[m]	1268.2
DNDPt33m	Transport, mitochondrial	dgdp[c] + dudp[m] -> dgdp[m] + dudp[c]	-1274.96
DNDPt35m	Transport, mitochondrial	dgdp[c] + dadp[m] -> dadp[c] + dgdp[m]	-1241.55
DNDPt36m	Transport, mitochondrial	dgdp[c] + dcdp[m] -> dcdp[c] + dgdp[m]	-1268.21
DNDPt38m	Transport, mitochondrial	dudp[m] + dutp[c] -> dudp[c] + dutp[m]	-1223.3
DNDPt40m	Transport, mitochondrial	dadp[m] + dutp[c] -> dadp[c] + dutp[m]	-1196.86
DNDPt41m	Transport, mitochondrial	dcdp[m] + dutp[c] -> dcdp[c] + dutp[m]	-1280.37
DNDPt61m	Transport, mitochondrial	dgtp[c] + dtdp[m] -> dgtp[m] + dtdp[c]	1214.37
DNDPt62m	Transport, mitochondrial	dgtp[c] + dgdp[m] -> dgdp[c] + dgtp[m]	1194.71
DNDPt9m	Transport, mitochondrial	dadp[c] + dtdp[m] -> dadp[m] + dtdp[c]	1193.29
MALTSULtm	Transport, mitochondrial	mal_L[c] + tsul[m] <=> mal_L[m] + tsul[c]	-699.238
MALSO3tm	Transport, mitochondrial	so3[m] + mal_L[c] <=> so3[c] + mal_L[m]	-699.238
FUMSO4tm	Transport, mitochondrial	fum[c] + so4[m] <=> fum[m] + so4[c]	699.237
ACACt2m	Transport, mitochondrial	h[c] + acac[c] -> h[m] + acac[m]	1092.34
CITtam	Transport, mitochondrial	cit[c] + mal_L[m] <=> cit[m] + mal_L[c]	1178.34
r1459	Transport, nuclear	ppi[c] <=> ppi[n]	-1912.87
COAtp	Transport, peroxisomal	coa[c] <=> coa[x]	-1416.53
CRNCAR3tp	Transport, peroxisomal	crn[c] + pcrn[x] -> crn[x] + pcrn[c]	-1291.82
Htx	Transport, peroxisomal	h[c] <=> h[x]	719.074
NADPtxu	Transport, peroxisomal	nadp[x] -> nadp[c]	-653.182
O2Stx	Transport, peroxisomal	o2s[c] <=> o2s[x]	-694.355
OCCOAtx	Transport, peroxisomal	occoa[c] <=> occoa[x]	-881.103
PMTCOAtx	Transport, peroxisomal	pmtcoa[c] <=> pmtcoa[x]	-893.437
STCOAtx	Transport, peroxisomal	stcoa[c] <=> stcoa[x]	-2167.35
CRNrtx	Transport, peroxisomal	crn[c] <=> crn[x]	-1291.82

## Sheet: marker_reaction_enzymes
ID	OFFICIAL_GENE_SYMBOL	Gene Name	EC_NUMBER	OMIM_DISEASE	GENETIC_ASSOCIATION_DB_DISEASE	HIV_INTERACTION	KEGG_PATHWAY	GOTERM_MF_FAT	HIV_INTERACTION_PUBMED_ID	PUBMED_ID
669	BPGM,	2,3-bisphosphoglycerate mutase	3.1.3.13,5.4.2.1,5.4.2.4,	Hemolytic anemia due to bisphosphoglycerate mutase deficiency,			hsa00010:Glycolysis / Gluconeogenesis,	GO:0004082~bisphosphoglycerate mutase activity,GO:0004083~2,3-bisphospho-D-glycerate 2-phosphohydrolase activity,GO:0004619~phosphoglycerate mutase activity,GO:0016791~phosphatase activity,GO:0016866~intramolecular transferase activity,GO:0016868~intramolecular transferase activity, phosphotransferases,GO:0034416~bisphosphoglycerate phosphatase activity,		11181995,12477932,12690205,1320611,1387804,14702039,152321,15258155,15489334,16344560,17052986,2542247,2824335,2844822,3023066,3036106,6313356,8440681,8889548,9308888,9832630,
10380	bpnt1,	3'(2'), 5'-bisphosphate nucleotidase 1	3.1.3.7,				hsa00920:Sulfur metabolism,	GO:0000287~magnesium ion binding,GO:0004437~inositol or phosphatidylinositol phosphatase activity,GO:0008252~nucleotidase activity,GO:0008441~3'(2'),5'-bisphosphate nucleotidase activity,GO:0016791~phosphatase activity,GO:0031403~lithium ion binding,GO:0031420~alkali metal ion binding,GO:0043167~ion binding,GO:0043169~cation binding,GO:0046872~metal ion binding,		10224133,12477932,14702039,15489334,
26275	HIBCH,	3-hydroxyisobutyryl-Coenzyme A hydrolase	3.1.2.4,	3-hydroxyisobutryl-CoA hydrolase deficiency,			hsa00280:Valine, leucine and isoleucine degradation,hsa00410:beta-Alanine metabolism,hsa00640:Propanoate metabolism,	GO:0003860~3-hydroxyisobutyryl-CoA hydrolase activity,GO:0016289~CoA hydrolase activity,GO:0016790~thiolester hydrolase activity,		11580916,12477932,15489334,15815621,17160907,17474147,8125298,8188708,8824301,9373149,
30833	NT5C,	5', 3'-nucleotidase, cytosolic	3.1.3.-,3.1.3.5,		pyrimidine 5' nucleotidase-I deficiency,		hsa00230:Purine metabolism,hsa00240:Pyrimidine metabolism,hsa00760:Nicotinate and nicotinamide metabolism,	GO:0000166~nucleotide binding,GO:0000287~magnesium ion binding,GO:0008252~nucleotidase activity,GO:0008253~5'-nucleotidase activity,GO:0016791~phosphatase activity,GO:0019103~pyrimidine nucleotide binding,GO:0043167~ion binding,GO:0043169~cation binding,GO:0046872~metal ion binding,		10681516,10899995,12234672,12418222,12477932,12714505,14702039,15136231,15489334,18669648,2157703,2833155,3186746,
22978	NT5C2,	5'-nucleotidase, cytosolic II	3.1.3.5,				hsa00230:Purine metabolism,hsa00240:Pyrimidine metabolism,hsa00760:Nicotinate and nicotinamide metabolism,	GO:0000166~nucleotide binding,GO:0000287~magnesium ion binding,GO:0008252~nucleotidase activity,GO:0008253~5'-nucleotidase activity,GO:0016791~phosphatase activity,GO:0043167~ion binding,GO:0043169~cation binding,GO:0046872~metal ion binding,		12477932,15164054,15489334,15923058,16189514,17350683,17405878,18669648,18775979,19428333,2839573,2848805,7999131,
4907	NT5E,	5'-nucleotidase, ecto (CD73)	3.1.3.5,				hsa00230:Purine metabolism,hsa00240:Pyrimidine metabolism,hsa00760:Nicotinate and nicotinamide metabolism,	GO:0000166~nucleotide binding,GO:0005506~iron ion binding,GO:0008198~ferrous iron binding,GO:0008252~nucleotidase activity,GO:0008253~5'-nucleotidase activity,GO:0008270~zinc ion binding,GO:0016791~phosphatase activity,GO:0043167~ion binding,GO:0043169~cation binding,GO:0046872~metal ion binding,GO:0046914~transition metal ion binding,		10470109,10570953,10898423,11004484,11046060,11067892,11149913,11163406,12000134,12030367,12170585,12477932,12774669,12892649,14574404,14578500,15489334,16303743,16344560,16709165,16718268,16735966,17065075,17487388,17671792,17911479,18062933,18566412,18636315,18787389,18924612,19008478,19159218,2129526,2137649,2173922,2848759,3036115,8000038,819433,8566797,8781432,9015312,9113412,9169488,9238677…
4524	Mthfr,	5,10-methylenetetrahydrofolate reductase (NADPH)	1.5.1.20,	Cleft lip/palate, susceptibility to,Homocystinuria due to MTHFR deficiency,Neural tube defects, susceptiblity to,Schizophrenia, susceptibility to,Thromboembolism, susceptibility to,Vascular disease, susceptiblity to,	5-fluorouracil sensitivity.,abdominal aortic aneurysm,abdominal aortic aneurysm homocysteine hypertension,abruptio placentae,acute leukemia,Alzheimer's Disease,Alzheimer's disease; vascular dementia,antineoplastic toxicity,antiphospholipid syndrome,arsenic metabolism,Arterial and venous thrombosis,asthma; folate; hyperhomocystinemia,atherosclerosis,atherosclerosis, coronary,atherosclerosis, coron…		hsa00670:One carbon pool by folate,hsa00680:Methane metabolism,	GO:0004489~methylenetetrahydrofolate reductase (NADPH) activity,GO:0016645~oxidoreductase activity, acting on the CH-NH group of donors,GO:0016646~oxidoreductase activity, acting on the CH-NH group of donors, NAD or NADP as acceptor,		10323741,10536004,10679944,10791559,11018168,11022077,11024398,11025596,11048629,11054348,11056246,11058711,11062308,11073851,11074490,11074524,11080594,11084577,11085290,11092508,11094304,11096266,11096270,11098041,11101473,11108898,11118403,11121176,11122096,11124649,11128675,11133719,11142765,11146461,11150582,11155296,11157318,11161947,11168435,11169021,11170082,11170083,11177206,11186937,111…
47	ACLY,	ATP citrate lyase	2.3.3.8,				hsa00020:Citrate cycle (TCA cycle),	GO:0000166~nucleotide binding,GO:0000287~magnesium ion binding,GO:0001882~nucleoside binding,GO:0001883~purine nucleoside binding,GO:0003878~ATP citrate synthase activity,GO:0004774~succinate-CoA ligase activity,GO:0004775~succinate-CoA ligase (ADP-forming) activity,GO:0005524~ATP binding,GO:0008815~citrate (pro-3S)-lyase activity,GO:0016405~CoA-ligase activity,GO:0016833~oxo-acid-lyase activity,…		10653665,12477932,1371749,14681844,14702039,15302935,15489334,15592455,17081983,17353931,17924679,18088087,18187866,18660489,18669648,18681781,18691976,18922930,19019082,19461003,2176822,3305493,6109001,6801225,8088842,9116495,9861020,
515	ATP5F1,	ATP synthase, H+ transporting, mitochondrial F0 complex, subunit B1	3.6.1.14,				hsa00190:Oxidative phosphorylation,hsa05010:Alzheimer's disease,hsa05012:Parkinson's disease,hsa05016:Huntington's disease,	GO:0015077~monovalent inorganic cation transmembrane transporter activity,GO:0015078~hydrogen ion transmembrane transporter activity,GO:0015399~primary active transmembrane transporter activity,GO:0015405~P-P-bond-hydrolysis-driven transmembrane transporter activity,GO:0016820~hydrolase activity, acting on acid anhydrides, catalyzing transmembrane movement of substances,GO:0016887~ATPase activity…		11827452,12110673,12477932,14749816,15489334,16710414,17353931,1831354,2868890,2883974,7706317,8125298,9373149,9461222,9834036,
516	ATP5G1,	ATP synthase, H+ transporting, mitochondrial F0 complex, subunit C1 (subunit 9)	3.6.1.14,				hsa00190:Oxidative phosphorylation,hsa05010:Alzheimer's disease,hsa05012:Parkinson's disease,hsa05016:Huntington's disease,	GO:0008289~lipid binding,GO:0015077~monovalent inorganic cation transmembrane transporter activity,GO:0015078~hydrogen ion transmembrane transporter activity,GO:0015399~primary active transmembrane transporter activity,GO:0015405~P-P-bond-hydrolysis-driven transmembrane transporter activity,GO:0016820~hydrolase activity, acting on acid anhydrides, catalyzing transmembrane movement of substances,G…		11076863,11230166,12477932,14702039,14749816,15489334,15489336,15906478,16381901,2883974,7698763,8328972,8485160,8889548,9461222,9834036,
517	ATP5G2,	ATP synthase, H+ transporting, mitochondrial F0 complex, subunit C2 (subunit 9)	3.6.1.14,				hsa00190:Oxidative phosphorylation,hsa05010:Alzheimer's disease,hsa05012:Parkinson's disease,hsa05016:Huntington's disease,	GO:0008289~lipid binding,GO:0015077~monovalent inorganic cation transmembrane transporter activity,GO:0015078~hydrogen ion transmembrane transporter activity,GO:0022890~inorganic cation transmembrane transporter activity,		11329013,12477932,14749816,15489334,16303743,16541075,2883974,7698763,7706317,8328972,8485160,9461222,9834036,
518	ATP5G3,	ATP synthase, H+ transporting, mitochondrial F0 complex, subunit C3 (subunit 9)	3.6.1.14,				hsa00190:Oxidative phosphorylation,hsa05010:Alzheimer's disease,hsa05012:Parkinson's disease,hsa05016:Huntington's disease,	GO:0008289~lipid binding,GO:0015077~monovalent inorganic cation transmembrane transporter activity,GO:0015078~hydrogen ion transmembrane transporter activity,GO:0022890~inorganic cation transmembrane transporter activity,		12477932,14667819,14702039,14749816,15489334,15815621,2883974,7698763,8328972,9461222,9834036,
521	Atp5i,	ATP synthase, H+ transporting, mitochondrial F0 complex, subunit E	3.6.1.14,				hsa00190:Oxidative phosphorylation,	GO:0015077~monovalent inorganic cation transmembrane transporter activity,GO:0015078~hydrogen ion transmembrane transporter activity,GO:0016887~ATPase activity,GO:0022890~inorganic cation transmembrane transporter activity,		10409428,11939412,12110673,12471886,12477932,12628343,12745923,14749816,15489334,16682002,18060860,8702853,9461222,9834036,
9551	ATP5J2,	ATP synthase, H+ transporting, mitochondrial F0 complex, subunit F2	3.6.1.14,				hsa00190:Oxidative phosphorylation,	GO:0016887~ATPase activity,		11042152,11959398,12110673,12471886,12477932,12628343,12690205,12745923,12853948,14702039,14749816,15489334,16169070,8125298,9373149,9461222,9653160,9834036,
522	Atp5j,	ATP synthase, H+ transporting, mitochondrial F0 complex, subunit F6	3.6.1.14,				hsa00190:Oxidative phosphorylation,hsa05010:Alzheimer's disease,hsa05012:Parkinson's disease,hsa05016:Huntington's disease,	GO:0015077~monovalent inorganic cation transmembrane transporter activity,GO:0015078~hydrogen ion transmembrane transporter activity,GO:0015399~primary active transmembrane transporter activity,GO:0015405~P-P-bond-hydrolysis-driven transmembrane transporter activity,GO:0016820~hydrolase activity, acting on acid anhydrides, catalyzing transmembrane movement of substances,GO:0016887~ATPase activity…		10830953,11230166,12110673,12471886,12477932,12628343,12745923,1286669,14633154,14749816,15489334,15709156,15785006,16230521,16532470,17456993,18243211,1825642,1830479,19106112,7698763,9461222,9732751,9834036,
10632	atp5l,	ATP synthase, H+ transporting, mitochondrial F0 complex, subunit G	3.6.1.14,				hsa00190:Oxidative phosphorylation,	GO:0015077~monovalent inorganic cation transmembrane transporter activity,GO:0015078~hydrogen ion transmembrane transporter activity,GO:0016887~ATPase activity,GO:0022890~inorganic cation transmembrane transporter activity,		11042152,11076863,11230166,12110673,12471886,12477932,12628343,12745923,14749816,15489334,15489336,16381901,17353931,9461222,9834036,
10476	atp5h,	ATP synthase, H+ transporting, mitochondrial F0 complex, subunit d	3.6.1.14,				hsa00190:Oxidative phosphorylation,hsa05010:Alzheimer's disease,hsa05012:Parkinson's disease,hsa05016:Huntington's disease,	GO:0015077~monovalent inorganic cation transmembrane transporter activity,GO:0015078~hydrogen ion transmembrane transporter activity,GO:0016887~ATPase activity,GO:0022890~inorganic cation transmembrane transporter activity,		11042152,12110673,12471886,12477932,12628343,12745923,14702039,14749816,15489334,19110265,7509337,9461222,9834036,
498	Atp5a1,	ATP synthase, H+ transporting, mitochondrial F1 complex, alpha subunit 1, cardiac muscle	3.6.1.14,				hsa00190:Oxidative phosphorylation,hsa05010:Alzheimer's disease,hsa05012:Parkinson's disease,hsa05016:Huntington's disease,	GO:0000166~nucleotide binding,GO:0001882~nucleoside binding,GO:0001883~purine nucleoside binding,GO:0005524~ATP binding,GO:0015077~monovalent inorganic cation transmembrane transporter activity,GO:0015078~hydrogen ion transmembrane transporter activity,GO:0015399~primary active transmembrane transporter activity,GO:0015405~P-P-bond-hydrolysis-driven transmembrane transporter activity,GO:0016820~h…		10077593,11381144,11410595,11741979,12110673,12477932,12614671,14702039,14743216,14749816,15324660,15489334,15862967,15952740,1602151,16344560,16378738,16714292,17643490,1830491,19110265,19405953,4517936,7498159,8065448,8086450,8168843,8428659,9284928,9461222,9834036,
506	ATP5B,	ATP synthase, H+ transporting, mitochondrial F1 complex, beta polypeptide	3.6.3.14,				hsa00190:Oxidative phosphorylation,hsa05010:Alzheimer's disease,hsa05012:Parkinson's disease,hsa05016:Huntington's disease,	GO:0000166~nucleotide binding,GO:0001882~nucleoside binding,GO:0001883~purine nucleoside binding,GO:0005509~calcium ion binding,GO:0005524~ATP binding,GO:0008034~lipoprotein binding,GO:0008553~hydrogen-exporting ATPase activity, phosphorylative mechanism,GO:0015077~monovalent inorganic cation transmembrane transporter activity,GO:0015078~hydrogen ion transmembrane transporter activity,GO:0015399~…		10077593,11410595,11790298,12110673,12206899,12477932,12511957,14499622,14749816,15242332,15324660,15489334,15635413,15952740,1602151,16169070,16230521,16236267,16751257,16890199,16927672,16996794,17510399,17643490,18063578,18284036,2687158,2870059,2896550,2900241,4517936,7798271,8065448,9461222,9834036,
513	Atp5d,	ATP synthase, H+ transporting, mitochondrial F1 complex, delta subunit	3.6.1.14,				hsa00190:Oxidative phosphorylation,hsa05010:Alzheimer's disease,hsa05012:Parkinson's disease,hsa05016:Huntington's disease,	GO:0000166~nucleotide binding,GO:0001882~nucleoside binding,GO:0001883~purine nucleoside binding,GO:0005524~ATP binding,GO:0015077~monovalent inorganic cation transmembrane transporter activity,GO:0015078~hydrogen ion transmembrane transporter activity,GO:0015399~primary active transmembrane transporter activity,GO:0015405~P-P-bond-hydrolysis-driven transmembrane transporter activity,GO:0016820~h…		11533724,12110673,12477932,12539966,1286669,12887009,14702039,14749816,14749837,15057824,1531933,15489334,4517936,9657145,9834036,
514	ATP5E,ATP5EP2,	ATP synthase, H+ transporting, mitochondrial F1 complex, epsilon subunit pseudogene 2; ATP synthase, H+ transporting, mitochondrial F1 complex, epsilon subunit	3.6.3.14,				hsa00190:Oxidative phosphorylation,hsa05010:Alzheimer's disease,hsa05012:Parkinson's disease,hsa05016:Huntington's disease,	GO:0015077~monovalent inorganic cation transmembrane transporter activity,GO:0015078~hydrogen ion transmembrane transporter activity,GO:0015399~primary active transmembrane transporter activity,GO:0015405~P-P-bond-hydrolysis-driven transmembrane transporter activity,GO:0016820~hydrolase activity, acting on acid anhydrides, catalyzing transmembrane movement of substances,GO:0016887~ATPase activity…		10727396,10931946,11173840,11780052,12110673,12477932,14702039,14749816,15057823,15489334,17924679,19016746,2137333,4517936,9461222,9834036,
509	Atp5c1,	ATP synthase, H+ transporting, mitochondrial F1 complex, gamma polypeptide 1	3.6.1.14,				hsa00190:Oxidative phosphorylation,hsa05010:Alzheimer's disease,hsa05012:Parkinson's disease,hsa05016:Huntington's disease,	GO:0015077~monovalent inorganic cation transmembrane transporter activity,GO:0015078~hydrogen ion transmembrane transporter activity,GO:0015399~primary active transmembrane transporter activity,GO:0015405~P-P-bond-hydrolysis-driven transmembrane transporter activity,GO:0016820~hydrolase activity, acting on acid anhydrides, catalyzing transmembrane movement of substances,GO:0016887~ATPase activity…		11533724,11744705,12110673,12477932,12887009,14749816,14749837,15164054,15489334,16169070,17686786,4517936,8065448,8168843,8227057,9461222,9657145,9834036,
4363	ABCC1,	ATP-binding cassette, sub-family C (CFTR/MRP), member 1			asthma,cancer,cardiotoxicity, anthracycline-induced,cystic fibrosis,GRACILE syndrome,nelfinavir pharmacokinetics,ovarian cancer,	tat:Tat,	hsa02010:ABC transporters,	GO:0000166~nucleotide binding,GO:0001882~nucleoside binding,GO:0001883~purine nucleoside binding,GO:0004409~homoaconitate hydratase activity,GO:0005524~ATP binding,GO:0015399~primary active transmembrane transporter activity,GO:0015405~P-P-bond-hydrolysis-driven transmembrane transporter activity,GO:0016820~hydrolase activity, acting on acid anhydrides, catalyzing transmembrane movement of substa…	16395283,	10064732,10493829,10811882,10835642,10950878,11114332,11139250,11266082,11278596,11278867,11439001,11465409,11469806,11557130,11561076,11600213,11689020,11721885,11755464,11771758,11783953,11809686,11820781,11925441,11937269,11986944,11995968,11996108,12018890,12034727,12042670,12084474,12119019,12135486,12146977,12163030,12186871,12235150,12388549,12388627,12458196,12486126,12576456,12628490,126…
215	Abcd1,	ATP-binding cassette, sub-family D (ALD), member 1		Adrenoleukodystrophy,Adrenomyeloneuropathy,	adrenoleukodystrophy,		hsa02010:ABC transporters,	GO:0000166~nucleotide binding,GO:0001882~nucleoside binding,GO:0001883~purine nucleoside binding,GO:0005319~lipid transporter activity,GO:0005324~long-chain fatty acid transporter activity,GO:0005325~peroxisomal fatty acyl CoA transporter activity,GO:0005524~ATP binding,GO:0015245~fatty acid transporter activity,GO:0015246~fatty acyl transporter activity,GO:0015399~primary active transmembrane tr…		10190819,10369742,10480364,10551832,10704444,10737980,10777694,10980539,11248239,11438993,11748843,11798073,11810273,11883941,11992258,12175782,12210797,12477932,12509471,12530690,12579499,12624723,14556192,14767898,15001567,15489334,15643618,15772093,15772651,15781447,16018167,16087056,16331554,17285533,1746561,17504626,17542813,17662307,17761426,17828604,18306728,18481121,18669648,18691976,1897…
1503	CTPS,	CTP synthase	6.3.4.2,				hsa00240:Pyrimidine metabolism,	GO:0000166~nucleotide binding,GO:0001882~nucleoside binding,GO:0001883~purine nucleoside binding,GO:0003883~CTP synthase activity,GO:0005524~ATP binding,GO:0016879~ligase activity, forming carbon-nitrogen bonds,GO:0017076~purine nucleotide binding,GO:0030554~adenyl nucleotide binding,GO:0032553~ribonucleotide binding,GO:0032555~purine ribonucleotide binding,GO:0032559~adenyl ribonucleotide bindin…		10064135,12477932,15302935,15324660,15489334,16083285,16097034,16179339,16710414,16820675,17081983,17353931,17463002,17681942,1783378,18088087,18220336,18600551,18669648,18691976,1959918,2113467,3355843,7981751,8125298,9373149,
80347	COASY,	Coenzyme A synthase	2.7.1.24,2.7.7.3,				hsa00770:Pantothenate and CoA biosynthesis,	GO:0000166~nucleotide binding,GO:0001882~nucleoside binding,GO:0001883~purine nucleoside binding,GO:0004140~dephospho-CoA kinase activity,GO:0004595~pantetheine-phosphate adenylyltransferase activity,GO:0005524~ATP binding,GO:0016779~nucleotidyltransferase activity,GO:0017076~purine nucleotide binding,GO:0030554~adenyl nucleotide binding,GO:0032553~ribonucleotide binding,GO:0032555~purine ribonuc…		11923312,11980892,11994049,12477932,14514684,14702039,15302935,15489334,15589845,16189514,16341674,16344560,16460672,16625196,18088087,18820009,8125298,8529999,9373149,
55577	nagK,	N-acetylglucosamine kinase	2.7.1.59,				hsa00520:Amino sugar and nucleotide sugar metabolism,	GO:0000166~nucleotide binding,GO:0001882~nucleoside binding,GO:0001883~purine nucleoside binding,GO:0005524~ATP binding,GO:0009384~N-acylmannosamine kinase activity,GO:0017076~purine nucleotide binding,GO:0019200~carbohydrate kinase activity,GO:0030554~adenyl nucleotide binding,GO:0032553~ribonucleotide binding,GO:0032555~purine ribonucleotide binding,GO:0032559~adenyl ribonucleotide binding,GO:0…		10824116,11741987,12112843,12477932,12665801,14702039,15231747,15489334,15815621,15987957,16189514,16344560,17010375,18669648,8125298,8982040,9373149,9468341,
4905	Nsf,	N-ethylmaleimide-sensitive factor	3.6.4.6,		progressive supranuclear palsy,			GO:0000149~SNARE binding,GO:0000166~nucleotide binding,GO:0000287~magnesium ion binding,GO:0001882~nucleoside binding,GO:0001883~purine nucleoside binding,GO:0004175~endopeptidase activity,GO:0004176~ATP-dependent peptidase activity,GO:0004252~serine-type endopeptidase activity,GO:0005524~ATP binding,GO:0008022~protein C-terminus binding,GO:0008233~peptidase activity,GO:0008236~serine-type peptid…		10196135,10458612,10683148,10747018,10903204,10954749,11403936,11461150,11511104,11680900,12011465,12130635,12477932,1315316,14567912,14607937,14769786,15293277,15322554,15489334,15858065,16169070,16461345,17353931,17510209,18077426,18836734,19086053,19167335,19208619,7622514,8013662,8051214,8636227,8875895,8940356,8973549,9286697,9325254,9349823,9362506,9697855,
65985	AACS,	acetoacetyl-CoA synthetase	6.2.1.16,				hsa00650:Butanoate metabolism,	GO:0000166~nucleotide binding,GO:0001882~nucleoside binding,GO:0001883~purine nucleoside binding,GO:0005524~ATP binding,GO:0016877~ligase activity, forming carbon-sulfur bonds,GO:0016878~acid-thiol ligase activity,GO:0017076~purine nucleotide binding,GO:0030554~adenyl nucleotide binding,GO:0030729~acetoacetate-CoA ligase activity,GO:0032553~ribonucleotide binding,GO:0032555~purine ribonucleotide …		12477932,12623130,14702039,15489334,17762044,17974005,18660489,4073493,9671465,
30	Acaa1,	acetyl-Coenzyme A acyltransferase 1	2.3.1.16,	Pseudo-Zellweger syndrome,	high altitude performance,nephropathy, diabetic,		hsa00071:Fatty acid metabolism,hsa00280:Valine, leucine and isoleucine degradation,hsa01040:Biosynthesis of unsaturated fatty acids,hsa03320:PPAR signaling pathway,	GO:0003988~acetyl-CoA C-acyltransferase activity,GO:0016408~C-acyltransferase activity,		10231028,10960480,11418601,12477932,14621081,15489334,16385653,1679347,18029348,18281296,2630187,2726492,2882519,3194209,7750978,8619474,9110174,
48	ACO1,	aconitase 1, soluble	4.2.1.3,				hsa00020:Citrate cycle (TCA cycle),hsa00630:Glyoxylate and dicarboxylate metabolism,	GO:0003723~RNA binding,GO:0003729~mRNA binding,GO:0003994~aconitate hydratase activity,GO:0005506~iron ion binding,GO:0016836~hydro-lyase activity,GO:0030350~iron-responsive element binding,GO:0043167~ion binding,GO:0043169~cation binding,GO:0046872~metal ion binding,GO:0046914~transition metal ion binding,GO:0051536~iron-sulfur cluster binding,GO:0051539~4 iron, 4 sulfur cluster binding,GO:00515…		10419470,10944468,11783942,11812787,12196178,12477932,12572667,12855587,12972614,15099026,15349772,15489334,15543932,15938636,16144863,16344560,16407072,16424901,16503547,16527810,17127713,17200797,17244191,1738601,17521334,17604281,17613866,18262302,1903202,1946430,2172968,2771641,8262977,8764614,9020582,
2180	ACSL1,	acyl-CoA synthetase long-chain family member 1	6.2.1.3,				hsa00071:Fatty acid metabolism,hsa03320:PPAR signaling pathway,hsa04920:Adipocytokine signaling pathway,	GO:0000166~nucleotide binding,GO:0000287~magnesium ion binding,GO:0001882~nucleoside binding,GO:0001883~purine nucleoside binding,GO:0004467~long-chain-fatty-acid-CoA ligase activity,GO:0005524~ATP binding,GO:0015645~fatty-acid ligase activity,GO:0016877~ligase activity, forming carbon-sulfur bonds,GO:0017076~purine nucleotide binding,GO:0030554~adenyl nucleotide binding,GO:0032553~ribonucleotide…		10548543,12477932,14702039,15292367,1531127,15489334,1599407,16054041,1607358,16834775,18660489,2007410,2341402,2973813,7429333,7490105,7948012,8399326,8584017,8889548,
2181	ACSL3,	acyl-CoA synthetase long-chain family member 3	6.2.1.3,				hsa00071:Fatty acid metabolism,hsa03320:PPAR signaling pathway,hsa04920:Adipocytokine signaling pathway,	GO:0000166~nucleotide binding,GO:0000287~magnesium ion binding,GO:0001882~nucleoside binding,GO:0001883~purine nucleoside binding,GO:0003987~acetate-CoA ligase activity,GO:0004321~fatty-acyl-CoA synthase activity,GO:0004467~long-chain-fatty-acid-CoA ligase activity,GO:0005524~ATP binding,GO:0015645~fatty-acid ligase activity,GO:0016405~CoA-ligase activity,GO:0016408~C-acyltransferase activity,GO:…		11707336,12477932,1433226,14702039,15292367,15302935,15489334,15556626,16354793,17220478,17761945,17901542,18003621,1848073,18691976,19221603,6240978,7987323,8663269,8889548,9177793,
51703	ACSL5,	acyl-CoA synthetase long-chain family member 5	6.2.1.3,		weight loss,		hsa00071:Fatty acid metabolism,hsa03320:PPAR signaling pathway,hsa04920:Adipocytokine signaling pathway,	GO:0000166~nucleotide binding,GO:0000287~magnesium ion binding,GO:0001882~nucleoside binding,GO:0001883~purine nucleoside binding,GO:0004467~long-chain-fatty-acid-CoA ligase activity,GO:0005524~ATP binding,GO:0015645~fatty-acid ligase activity,GO:0016877~ligase activity, forming carbon-sulfur bonds,GO:0017076~purine nucleotide binding,GO:0030554~adenyl nucleotide binding,GO:0032553~ribonucleotide…		11127823,11319232,11707336,12147264,12477932,12975309,14608540,15164054,15292367,15489334,15736044,15809837,16198472,16959974,17495181,17681178,17761945,18228202,18806831,8125298,9373149,
55902	ACSS2,	acyl-CoA synthetase short-chain family member 2	6.2.1.1,				hsa00010:Glycolysis / Gluconeogenesis,hsa00620:Pyruvate metabolism,hsa00640:Propanoate metabolism,	GO:0000166~nucleotide binding,GO:0001882~nucleoside binding,GO:0001883~purine nucleoside binding,GO:0003987~acetate-CoA ligase activity,GO:0005524~ATP binding,GO:0016208~AMP binding,GO:0016405~CoA-ligase activity,GO:0016877~ligase activity, forming carbon-sulfur bonds,GO:0016878~acid-thiol ligase activity,GO:0017076~purine nucleotide binding,GO:0030554~adenyl nucleotide binding,GO:0032553~ribonuc…		10843999,11780052,12477932,14702039,15231747,15489334,16344560,16788062,18029348,18088087,18660489,18669648,
641371	Acot1,	acyl-CoA thioesterase 1	3.1.2.2,				hsa01040:Biosynthesis of unsaturated fatty acids,	GO:0004091~carboxylesterase activity,GO:0016289~CoA hydrolase activity,GO:0016290~palmitoyl-CoA hydrolase activity,GO:0016291~acyl-CoA thioesterase activity,GO:0016790~thiolester hydrolase activity,		12477932,15489334,16103133,16940157,
641372	ACOT6,	acyl-CoA thioesterase 6	3.1.2.-,3.1.2.2,					GO:0004091~carboxylesterase activity,		12477932,15489334,16103133,16940157,
35	Acads,	acyl-Coenzyme A dehydrogenase, C-2 to C-3 short chain	1.3.99.2,	Acyl-CoA dehydrogenase, short-chain, deficiency of,	acyl-CoA dehydrogenase (SCAD) deficiency,medium-chain acyl-CoA dehydrogenase deficiency,		hsa00071:Fatty acid metabolism,hsa00280:Valine, leucine and isoleucine degradation,hsa00650:Butanoate metabolism,	GO:0000062~acyl-CoA binding,GO:0000166~nucleotide binding,GO:0001882~nucleoside binding,GO:0001883~purine nucleoside binding,GO:0003995~acyl-CoA dehydrogenase activity,GO:0004085~butyryl-CoA dehydrogenase activity,GO:0005504~fatty acid binding,GO:0008289~lipid binding,GO:0009055~electron carrier activity,GO:0017076~purine nucleotide binding,GO:0030554~adenyl nucleotide binding,GO:0031406~carboxyl…		11134486,12220177,12477932,12706374,1286669,15489334,15902559,16376132,16729965,1692038,18045290,18054510,18175080,18184946,18523805,18539996,18977676,2565344,8276399,8503850,8889548,9383286,9499414,
34	ACADM,	acyl-Coenzyme A dehydrogenase, C-4 to C-12 straight chain	1.3.99.3,	Acyl-CoA dehydrogenase, medium chain, deficiency of,	lipid metabolism disorders,MCADD (medium chain acyl-coA hydrhydrogenase defin,medium-chain acyl-CoA dehydrogenase (MCAD) deficiency,medium-chain acyl-CoA dehydrogenase deficiency,SCAD deficiency,		hsa00071:Fatty acid metabolism,hsa00280:Valine, leucine and isoleucine degradation,hsa00410:beta-Alanine metabolism,hsa00640:Propanoate metabolism,hsa03320:PPAR signaling pathway,	GO:0000166~nucleotide binding,GO:0001882~nucleoside binding,GO:0001883~purine nucleoside binding,GO:0003995~acyl-CoA dehydrogenase activity,GO:0009055~electron carrier activity,GO:0017076~purine nucleotide binding,GO:0030554~adenyl nucleotide binding,GO:0048037~cofactor binding,GO:0050660~FAD binding,GO:0050662~coenzyme binding,		10767181,11263545,11349232,11409868,11486912,11517203,12477932,12522104,12562916,12914524,1363805,14692513,14970748,15159392,15171999,15489334,15832312,15896661,15902558,15975918,16128823,16236267,16291504,16617240,1671131,1679031,1684086,16917729,16959974,17186412,1729890,1731887,17539907,18188679,18241067,18660489,18927092,1902818,19064330,2251268,2393404,2394825,3035565,3462713,3597357,3786030…
100	ada,	adenosine deaminase	3.5.4.4,	Adenosine deaminase deficiency, partial,Severe combined immunodeficiency due to ADA deficiency,	asthma,atherosclerosis, coronary,autism,Crohn's disease; asthma; malaria,diabetes, type 1,diabetes, type 2,hepatitis C,hepatitis C, chronic,hypertension,IgE,intrauterine growth,mental retardation,	env:Envelope surface glycoprotein gp120,	hsa00230:Purine metabolism,hsa05340:Primary immunodeficiency,	GO:0001882~nucleoside binding,GO:0001883~purine nucleoside binding,GO:0004000~adenosine deaminase activity,GO:0008270~zinc ion binding,GO:0016814~hydrolase activity, acting on carbon-nitrogen (but not peptide) bonds, in cyclic amidines,GO:0019239~deaminase activity,GO:0043167~ion binding,GO:0043169~cation binding,GO:0046872~metal ion binding,GO:0046914~transition metal ion binding,	10899322,11278278,9103436,9330696,	10506947,11121182,11125033,11278278,11354825,11534018,11772392,11780052,11901152,11999881,12104097,12113294,12150791,12381379,12477932,12712614,12774669,12809673,1284479,12935677,14684150,14726805,15016824,15063762,15257174,15281007,15489334,15632314,15761857,15983379,16133068,16221767,16224193,16410722,16670267,16724628,16754522,16886895,1696926,16970880,17181544,17243920,17287605,17340203,17397…
132	adk,	adenosine kinase	2.7.1.20,		diabetes, type 1,		hsa00230:Purine metabolism,	GO:0000166~nucleotide binding,GO:0000287~magnesium ion binding,GO:0001882~nucleoside binding,GO:0001883~purine nucleoside binding,GO:0004001~adenosine kinase activity,GO:0005524~ATP binding,GO:0017076~purine nucleotide binding,GO:0019205~nucleobase, nucleoside, nucleotide kinase activity,GO:0019206~nucleoside kinase activity,GO:0030554~adenyl nucleotide binding,GO:0032553~ribonucleotide binding,G…		10215863,11242543,12112843,12477932,12820662,15489334,17154503,18309031,185014,18600536,18600545,621091,8577746,8917457,9070863,9843365,
272	AMPD3,	adenosine monophosphate deaminase (isoform E)	3.5.4.6,	AMP deaminase deficiency, erythrocytic,			hsa00230:Purine metabolism,	GO:0003876~AMP deaminase activity,GO:0016814~hydrolase activity, acting on carbon-nitrogen (but not peptide) bonds, in cyclic amidines,GO:0019239~deaminase activity,		11139257,12213808,12477932,12604357,1400401,1420359,15489334,15807549,16670071,18409530,18493842,3804327,7881427,8004104,8140814,8611627,8863347,9291127,9598089,
270	AMPD1,	adenosine monophosphate deaminase 1 (isoform M)	3.5.4.6,	Myoadenylate deaminase deficiency,	cardiac function,cardiorespiratory responses to exercise,cardiovascular disease,congestive heart failure,coronary artery disease,endurance performance,glucose tolerance heart disease, ischemic,heart failure,heart failure myocardial infarct,insulin,left ventricular dysfunction,myocardial infarct; cardiac death; heart failure; angina; coronary revascularization,myopathy, drug-induced,rheumatoid art…		hsa00230:Purine metabolism,	GO:0003876~AMP deaminase activity,GO:0016814~hydrolase activity, acting on carbon-nitrogen (but not peptide) bonds, in cyclic amidines,GO:0019239~deaminase activity,		10086964,10996775,11028479,11102975,12117480,12213808,12477932,12783984,1370861,1400401,14702039,15135700,15173240,15239633,15309698,15368811,15489334,15677729,15793265,15882662,16021915,16021918,1631143,16360962,16570231,16671104,16707139,16710414,16767606,16875916,16947783,16959974,16996850,17376785,17463303,17530705,17565237,17630210,17687759,18224333,18338202,18409530,18493842,18801770,188552…
271	ampd2,	adenosine monophosphate deaminase 2 (isoform L)	3.5.4.6,				hsa00230:Purine metabolism,	GO:0003876~AMP deaminase activity,GO:0016814~hydrolase activity, acting on carbon-nitrogen (but not peptide) bonds, in cyclic amidines,GO:0019239~deaminase activity,		12477932,12745092,1400401,1429593,15489334,16964243,17081983,18088087,18187866,18493842,18669648,8526848,8764830,
203	ak1,	adenylate kinase 1	2.7.4.3,	Hemolytic anemia due to adenylate kinase deficiency,	chronic haemolytic anaemia.,		hsa00230:Purine metabolism,	GO:0000166~nucleotide binding,GO:0001882~nucleoside binding,GO:0001883~purine nucleoside binding,GO:0004017~adenylate kinase activity,GO:0005524~ATP binding,GO:0016776~phosphotransferase activity, phosphate group as acceptor,GO:0017076~purine nucleotide binding,GO:0019201~nucleotide kinase activity,GO:0019205~nucleobase, nucleoside, nucleotide kinase activity,GO:0019206~nucleoside kinase activity…		10233365,10557075,12124227,12432079,12477932,12649162,15489334,16344560,16714292,17353931,18029348,183954,18404568,18850517,19165527,211388,2541064,2542324,3024483,6305188,7947281,8125298,9373149,9432020,9504408,
204	Ak2,	adenylate kinase 2	2.7.4.3,				hsa00230:Purine metabolism,	GO:0000166~nucleotide binding,GO:0001882~nucleoside binding,GO:0001883~purine nucleoside binding,GO:0004017~adenylate kinase activity,GO:0005524~ATP binding,GO:0016776~phosphotransferase activity, phosphate group as acceptor,GO:0017076~purine nucleotide binding,GO:0019201~nucleotide kinase activity,GO:0019205~nucleobase, nucleoside, nucleotide kinase activity,GO:0019206~nucleoside kinase activity…		10218571,12477932,14702039,15489334,15862967,16710414,17952061,18404568,19043416,19043417,19054851,195572,6182143,6961883,8843353,9434148,9504408,
50808	ak3,	adenylate kinase 3	2.7.4.10,				hsa00240:Pyrimidine metabolism,	GO:0000166~nucleotide binding,GO:0001882~nucleoside binding,GO:0001883~purine nucleoside binding,GO:0004017~adenylate kinase activity,GO:0005524~ATP binding,GO:0005525~GTP binding,GO:0016776~phosphotransferase activity, phosphate group as acceptor,GO:0017076~purine nucleotide binding,GO:0019001~guanyl nucleotide binding,GO:0019201~nucleotide kinase activity,GO:0019205~nucleobase, nucleoside, nucl…		11485571,12477932,14702039,15164053,15489334,182062,
26289	AK5,	adenylate kinase 5	2.7.4.3,				hsa00230:Purine metabolism,	GO:0000166~nucleotide binding,GO:0001882~nucleoside binding,GO:0001883~purine nucleoside binding,GO:0004017~adenylate kinase activity,GO:0005524~ATP binding,GO:0016776~phosphotransferase activity, phosphate group as acceptor,GO:0017076~purine nucleotide binding,GO:0019201~nucleotide kinase activity,GO:0019205~nucleobase, nucleoside, nucleotide kinase activity,GO:0019206~nucleoside kinase activity…		10215863,12477932,14702039,15489334,16169070,
122481	ak7,	adenylate kinase 7	2.7.4.3,				hsa00230:Purine metabolism,	GO:0000166~nucleotide binding,GO:0001882~nucleoside binding,GO:0001883~purine nucleoside binding,GO:0004017~adenylate kinase activity,GO:0005524~ATP binding,GO:0016776~phosphotransferase activity, phosphate group as acceptor,GO:0017076~purine nucleotide binding,GO:0019201~nucleotide kinase activity,GO:0019205~nucleobase, nucleoside, nucleotide kinase activity,GO:0030554~adenyl nucleotide binding,…		12477932,12508121,14702039,15489334,
125, 126, 124	ADH1A,ADH1B,Adh1c,	alcohol dehydrogenase 1B (class I), beta polypeptide; alcohol dehydrogenase 1A (class I), alpha polypeptide; alcohol dehydrogenase 1C (class I), gamma polypeptide	1.1.1.1,	Alcoholism, susceptibility to,Does parental expressed emotion moderate genetic effects in ADHD? An exploration using a genome wide association scan,Parkinson disease, susceptibility to,	aerodigestive tract cancers,alcohol abuse,alcohol abuse cirrhosis, alcoholic pancreatitis, chronic,alcohol abuse; liver disease, alcoholic,alcohol abuse; smoking behavior,alcohol consumption blood pressure, arterial cholesterol, HDL heart disease, ischemic,alcohol dependence,alcohol dependency,alcohol elimination,alcohol-elimination rates,alcoholism,alcoholism and alcoholic liver disease,atherosc…		hsa00010:Glycolysis / Gluconeogenesis,hsa00071:Fatty acid metabolism,hsa00350:Tyrosine metabolism,hsa00830:Retinol metabolism,hsa00980:Metabolism of xenobiotics by cytochrome P450,hsa00982:Drug metabolism,	GO:0004022~alcohol dehydrogenase (NAD) activity,GO:0004024~alcohol dehydrogenase activity, zinc-dependent,GO:0008270~zinc ion binding,GO:0030528~transcription regulator activity,GO:0043167~ion binding,GO:0043169~cation binding,GO:0046872~metal ion binding,GO:0046914~transition metal ion binding,		10405330,10424757,10733556,11045794,11051375,11117576,11159741,11207350,11238183,11259352,11274460,11303599,11356310,11398342,11410735,11584144,11696658,11700261,11740346,11748356,11752857,11781503,11781511,11802217,11966948,12080432,12081471,12089173,12153842,12173598,12189549,12211622,12213289,12244546,12351924,12376487,12392591,12419833,12452180,12461493,12477932,12500098,12505800,12517056,125…
127	ADH4,	alcohol dehydrogenase 4 (class II), pi polypeptide	1.1.1.1,		alcohol abuse,alcohol dependence; cocaine dependence,alcohol dependence; drug dependence,Parkinson's disease,personality traits,		hsa00010:Glycolysis / Gluconeogenesis,hsa00071:Fatty acid metabolism,hsa00350:Tyrosine metabolism,hsa00830:Retinol metabolism,hsa00980:Metabolism of xenobiotics by cytochrome P450,hsa00982:Drug metabolism,	GO:0000166~nucleotide binding,GO:0003960~NADPH:quinone reductase activity,GO:0004022~alcohol dehydrogenase (NAD) activity,GO:0004024~alcohol dehydrogenase activity, zinc-dependent,GO:0004032~aldehyde reductase activity,GO:0004033~aldo-keto reductase activity,GO:0004745~retinol dehydrogenase activity,GO:0005501~retinoid binding,GO:0005503~all-trans retinal binding,GO:0008270~zinc ion binding,GO:00…		10407146,11009184,11279029,11752456,11900616,11916005,11964133,11997393,12477932,12631290,1362387,14702039,14745297,15369820,15489334,15815621,15863808,16220108,16237392,16787387,17069770,18331377,18801187,1889753,18996923,19182438,19193628,19343046,3036213,3036213],3466164,8032153,9570155,
128	ADH5,ADH5P4,	alcohol dehydrogenase 5 (class III), chi polypeptide, pseudogene 4; alcohol dehydrogenase 5 (class III), chi polypeptide	1.1.1.-,1.1.1.1,1.1.1.284,		alcohol dependence,asthma,drug dependence,		hsa00010:Glycolysis / Gluconeogenesis,hsa00071:Fatty acid metabolism,hsa00350:Tyrosine metabolism,hsa00680:Methane metabolism,hsa00830:Retinol metabolism,hsa00980:Metabolism of xenobiotics by cytochrome P450,hsa00982:Drug metabolism,	GO:0000166~nucleotide binding,GO:0004022~alcohol dehydrogenase (NAD) activity,GO:0005504~fatty acid binding,GO:0008270~zinc ion binding,GO:0008289~lipid binding,GO:0009055~electron carrier activity,GO:0016620~oxidoreductase activity, acting on the aldehyde or oxo group of donors, NAD or NADP as acceptor,GO:0018467~formaldehyde dehydrogenase activity,GO:0031406~carboxylic acid binding,GO:0033293~m…		10661511,10978156,12004059,12141816,12196016,12477932,12484756,12604204,1446828,1453005,14608084,15489334,16169070,16201836,16605250,16685648,17185388,17543375,18095160,18331377,18636124,18996923,19165527,2679557,2818582,2934732,2936344,3365377,3365377],6375718,6424546,7948423,8460164,8494891,8503936,9018047,
130	ADH6,	alcohol dehydrogenase 6 (class V)	1.1.1.1,		alcohol dependence,drug dependence,		hsa00010:Glycolysis / Gluconeogenesis,hsa00071:Fatty acid metabolism,hsa00350:Tyrosine metabolism,hsa00830:Retinol metabolism,hsa00980:Metabolism of xenobiotics by cytochrome P450,hsa00982:Drug metabolism,	GO:0004022~alcohol dehydrogenase (NAD) activity,GO:0004024~alcohol dehydrogenase activity, zinc-dependent,GO:0008270~zinc ion binding,GO:0009055~electron carrier activity,GO:0043167~ion binding,GO:0043169~cation binding,GO:0046872~metal ion binding,GO:0046914~transition metal ion binding,		10975466,11095947,12050823,12477932,14702039,15489334,1593644,16685648,17185388,1755855,1881901,19343046,2198032,7695785,
131	adh7,	alcohol dehydrogenase 7 (class IV), mu or sigma polypeptide	1.1.1.1,		alcohol dependence,atherosclerosis, coronary blood pressure, arterial cholesterol, HDL,drug dependence,multiple system atrophy,triglycerides; blood pressure, arterial; antioxidant activity,		hsa00010:Glycolysis / Gluconeogenesis,hsa00071:Fatty acid metabolism,hsa00350:Tyrosine metabolism,hsa00830:Retinol metabolism,hsa00980:Metabolism of xenobiotics by cytochrome P450,hsa00982:Drug metabolism,	GO:0004022~alcohol dehydrogenase (NAD) activity,GO:0004024~alcohol dehydrogenase activity, zinc-dependent,GO:0004031~aldehyde oxidase activity,GO:0004745~retinol dehydrogenase activity,GO:0005501~retinoid binding,GO:0008270~zinc ion binding,GO:0008289~lipid binding,GO:0016623~oxidoreductase activity, acting on the aldehyde or oxo group of donors, oxygen as acceptor,GO:0019840~isoprenoid binding,G…		10631979,11997393,14502680,15456134,15489334,15815621,1592118,16180008,16685648,17185388,17486761,17918242,17921519,18231859,18331377,18500343,19193628,19343046,7771649,7876099,7876191,7925371,8074657,8082805,8125298,8195208,8824810,9228021,9373149,9600267,
137872	adhfe1,	alcohol dehydrogenase, iron containing, 1	1.1.99.24,					GO:0043167~ion binding,GO:0043169~cation binding,GO:0046872~metal ion binding,GO:0047988~hydroxyacid-oxoacid transhydrogenase activity,		12477932,12592711,14702039,15221005,15489334,16435184,16616524,16959974,19013439,
220	ALDH1A3,	aldehyde dehydrogenase 1 family, member A3	1.2.1.5,				hsa00010:Glycolysis / Gluconeogenesis,hsa00340:Histidine metabolism,hsa00350:Tyrosine metabolism,hsa00360:Phenylalanine metabolism,hsa00980:Metabolism of xenobiotics by cytochrome P450,hsa00982:Drug metabolism,	GO:0004030~aldehyde dehydrogenase [NAD(P)+] activity,GO:0016620~oxidoreductase activity, acting on the aldehyde or oxo group of donors, NAD or NADP as acceptor,GO:0042802~identical protein binding,GO:0042803~protein homodimerization activity,GO:0046983~protein dimerization activity,		11585737,12040753,12477932,15489334,19343046,7698756,9490025,
221	Aldh3b1,	aldehyde dehydrogenase 3 family, member B1	1.2.1.5,		schizophrenia,		hsa00010:Glycolysis / Gluconeogenesis,hsa00340:Histidine metabolism,hsa00350:Tyrosine metabolism,hsa00360:Phenylalanine metabolism,hsa00980:Metabolism of xenobiotics by cytochrome P450,hsa00982:Drug metabolism,	GO:0004028~3-chloroallyl aldehyde dehydrogenase activity,GO:0004030~aldehyde dehydrogenase [NAD(P)+] activity,GO:0016620~oxidoreductase activity, acting on the aldehyde or oxo group of donors, NAD or NADP as acceptor,		12477932,14702039,15489334,16092759,17382292,18187866,19159868,19343046,7828891,9161417,9490025,
222	ALDH3B2,	aldehyde dehydrogenase 3 family, member B2	1.2.1.5,				hsa00010:Glycolysis / Gluconeogenesis,hsa00340:Histidine metabolism,hsa00350:Tyrosine metabolism,hsa00360:Phenylalanine metabolism,hsa00980:Metabolism of xenobiotics by cytochrome P450,hsa00982:Drug metabolism,	GO:0004028~3-chloroallyl aldehyde dehydrogenase activity,GO:0004030~aldehyde dehydrogenase [NAD(P)+] activity,GO:0016620~oxidoreductase activity, acting on the aldehyde or oxo group of donors, NAD or NADP as acceptor,		10737800,12477932,14702039,15342556,15489334,19343046,7484374,8890755,9161417,
218	ALDH3A1,	aldehyde dehydrogenase 3 family, memberA1	1.2.1.5,		Posttransplantation diabetes mellitus (PTDM),schizophrenia,		hsa00010:Glycolysis / Gluconeogenesis,hsa00340:Histidine metabolism,hsa00350:Tyrosine metabolism,hsa00360:Phenylalanine metabolism,hsa00980:Metabolism of xenobiotics by cytochrome P450,hsa00982:Drug metabolism,	GO:0004028~3-chloroallyl aldehyde dehydrogenase activity,GO:0004029~aldehyde dehydrogenase (NAD) activity,GO:0004030~aldehyde dehydrogenase [NAD(P)+] activity,GO:0004033~aldo-keto reductase activity,GO:0008106~alcohol dehydrogenase (NADP+) activity,GO:0016620~oxidoreductase activity, acting on the aldehyde or oxo group of donors, NAD or NADP as acceptor,		10780262,11256614,12081471,12367788,12477932,12706498,12943535,1306115,14702039,14745454,15489334,15905174,16344560,16625196,1737758,18496131,18536178,18621017,18854779,19025616,1905102,19058789,19343046,19360691,2037078,4073832,7228061,7625577,7774944,8125298,8493892,8889548,9027499,9250352,9373149,9514081,9855707,
51005	AMDHD2,	amidohydrolase domain containing 2	3.5.1.25,				hsa00520:Amino sugar and nucleotide sugar metabolism,	GO:0008448~N-acetylglucosamine-6-phosphate deacetylase activity,GO:0016811~hydrolase activity, acting on carbon-nitrogen (but not peptide) bonds, in linear amides,GO:0019213~deacetylase activity,		10810093,12477932,15146197,15489334,16959974,
570	baat,	bile acid Coenzyme A: amino acid N-acyltransferase (glycine N-choloyltransferase)	2.3.1.65,3.1.2.2,	Hypercholanemia, familial,			hsa00120:Primary bile acid biosynthesis,hsa00430:Taurine and hypotaurine metabolism,hsa01040:Biosynthesis of unsaturated fatty acids,	GO:0004091~carboxylesterase activity,GO:0016289~CoA hydrolase activity,GO:0016290~palmitoyl-CoA hydrolase activity,GO:0016291~acyl-CoA thioesterase activity,GO:0016410~N-acyltransferase activity,GO:0016790~thiolester hydrolase activity,GO:0047963~glycine N-choloyltransferase activity,		10574970,10884298,12239217,12477932,12704386,12763038,12810727,15164053,15489334,17256745,17495420,18793185,2037576,8034703,8954802,
1374	Cpt1a,	carnitine palmitoyltransferase 1A (liver)	2.3.1.21,	CPT deficiency, hepatic, type IA,	diabetes, type 2 hepatic lipid content insulin,hepatitis C, chronic,left ventricular hypertrophy,obesity,	env:Envelope surface glycoprotein gp160, precursor,	hsa00071:Fatty acid metabolism,hsa03320:PPAR signaling pathway,hsa04920:Adipocytokine signaling pathway,	GO:0004095~carnitine O-palmitoyltransferase activity,GO:0008374~O-acyltransferase activity,GO:0016406~carnitine O-acyltransferase activity,GO:0016409~palmitoyltransferase activity,GO:0016416~O-palmitoyltransferase activity,	11095714,	10408760,11001805,11095714,11350182,11441142,12111367,12189492,12464674,12477932,14517221,14711372,15110323,15489334,15647998,15669684,15846373,16246309,16271724,16344560,16697732,16806233,17089095,17445541,17452323,18253084,18385088,18996102,19181627,19217814,7892212,9070836,9070950,9691089,
126129	Cpt1c,	carnitine palmitoyltransferase 1C	2.3.1.21,			env:Envelope surface glycoprotein gp160, precursor,	hsa00071:Fatty acid metabolism,hsa03320:PPAR signaling pathway,hsa04920:Adipocytokine signaling pathway,	GO:0004095~carnitine O-palmitoyltransferase activity,GO:0008374~O-acyltransferase activity,GO:0016406~carnitine O-acyltransferase activity,GO:0016409~palmitoyltransferase activity,GO:0016416~O-palmitoyltransferase activity,	11095714,	11001805,11095714,12376098,12477932,14702039,15489334,17974005,18192268,18385088,
1376	cpt2,	carnitine palmitoyltransferase 2	2.3.1.21,	CPT deficiency, hepatic, type II,CPT II deficiency, lethal neonatal,Myopathy due to CPT II deficiency,	left ventricular hypertrophy,myopathy, drug-induced,variable myopathy,	env:Envelope surface glycoprotein gp160, precursor,	hsa00071:Fatty acid metabolism,hsa03320:PPAR signaling pathway,	GO:0004095~carnitine O-palmitoyltransferase activity,GO:0008374~O-acyltransferase activity,GO:0016406~carnitine O-acyltransferase activity,GO:0016409~palmitoyltransferase activity,GO:0016416~O-palmitoyltransferase activity,	11095714,	10090476,10607472,11001805,11095714,11257506,11477613,11855939,11994355,12408750,12410208,12477932,12707442,12971426,1339389,14605500,14615409,1528846,15489334,15622536,15642848,15647998,15754283,16054041,16168441,16670153,16671104,16710414,16996287,17179390,17651973,17709715,17936304,18024217,18306170,18363739,18550408,18645163,18996102,1961767,1988962,2174799,7711730,7892212,7896283,8086471,812…
1375	CHKB,Cpt1b,	choline kinase beta; carnitine palmitoyltransferase 1B (muscle)	2.3.1.21,2.7.1.32,2.7.1.82,	A genome-wide association study for late-onset Alzheimer's disease using DNA pooling,Variant between CPT1B and CHKB associated with susceptibility to narcolepsy,	left ventricular hypertrophy,obesity,	env:Envelope surface glycoprotein gp160, precursor,	hsa00071:Fatty acid metabolism,hsa00564:Glycerophospholipid metabolism,hsa03320:PPAR signaling pathway,hsa04920:Adipocytokine signaling pathway,	GO:0000166~nucleotide binding,GO:0001882~nucleoside binding,GO:0001883~purine nucleoside binding,GO:0004095~carnitine O-palmitoyltransferase activity,GO:0004103~choline kinase activity,GO:0004305~ethanolamine kinase activity,GO:0005524~ATP binding,GO:0008374~O-acyltransferase activity,GO:0016406~carnitine O-acyltransferase activity,GO:0016409~palmitoyltransferase activity,GO:0016416~O-palmitoyltr…	11095714,	10408760,10493829,10591208,10706593,10918069,11001805,11095714,11257506,11258795,12015320,12477932,12565845,14702039,15003397,15356291,15461802,15489334,15579906,15647998,16054041,17089095,17924679,17987377,18660489,18820697,18823527,18996102,19074885,19404393,8125298,8679700,9070950,9199240,9224698,9344464,9370318,9373149,9487136,
1431	CS,	citrate synthase	2.3.3.1,		spermatogenesis,		hsa00020:Citrate cycle (TCA cycle),hsa00630:Glyoxylate and dicarboxylate metabolism,	GO:0004108~citrate (Si)-synthase activity,GO:0046912~transferase activity, transferring acyl groups, acyl groups converted into alkyl on transfer,		11377425,12198136,12477932,12531911,12549038,14702039,14743216,14760703,15242332,15489334,15711981,15714131,16303743,16751257,17298551,17974005,318158,7285903,9543345,9792662,9809442,
51727	CMPK1,	cytidine monophosphate (UMP-CMP) kinase 1, cytosolic	2.7.4.14,				hsa00240:Pyrimidine metabolism,	GO:0000166~nucleotide binding,GO:0001882~nucleoside binding,GO:0001883~purine nucleoside binding,GO:0004127~cytidylate kinase activity,GO:0004849~uridine kinase activity,GO:0005524~ATP binding,GO:0016776~phosphotransferase activity, phosphate group as acceptor,GO:0017076~purine nucleotide binding,GO:0019201~nucleotide kinase activity,GO:0019205~nucleobase, nucleoside, nucleotide kinase activity,G…		10462544,10931946,11681623,11912132,12477932,12694191,1286669,15163660,15489334,15550676,15606899,16710414,17608725,8125298,8313870,9373149,
1737	dlaT,	dihydrolipoamide S-acetyltransferase	2.3.1.12,	Pyruvate dehydrogenase E2 deficiency,			hsa00010:Glycolysis / Gluconeogenesis,hsa00020:Citrate cycle (TCA cycle),hsa00620:Pyruvate metabolism,	GO:0004742~dihydrolipoyllysine-residue acetyltransferase activity,GO:0016407~acetyltransferase activity,GO:0016417~S-acyltransferase activity,GO:0016418~S-acetyltransferase activity,GO:0030523~dihydrolipoamide S-acyltransferase activity,GO:0031405~lipoic acid binding,GO:0031406~carboxylic acid binding,GO:0048037~cofactor binding,GO:0050662~coenzyme binding,		11978179,12395322,12477932,12816949,14638692,14702039,15120760,15489334,15861126,16049940,16554811,17068145,17532006,17683942,18184588,18206651,18387944,19185000,19240061,2317220,3036145,3174635,3191998,8102256,8125298,9373149,9649469,
1738	dld,	dihydrolipoamide dehydrogenase	1.8.1.4,	Leigh syndrome,Maple syrup urine disease, type III,	Alzheimer's Disease,		hsa00010:Glycolysis / Gluconeogenesis,hsa00020:Citrate cycle (TCA cycle),hsa00260:Glycine, serine and threonine metabolism,hsa00280:Valine, leucine and isoleucine degradation,hsa00620:Pyruvate metabolism,	GO:0000166~nucleotide binding,GO:0001882~nucleoside binding,GO:0001883~purine nucleoside binding,GO:0004148~dihydrolipoyl dehydrogenase activity,GO:0009055~electron carrier activity,GO:0016651~oxidoreductase activity, acting on NADH or NADPH,GO:0016667~oxidoreductase activity, acting on sulfur group of donors,GO:0016668~oxidoreductase activity, acting on sulfur group of donors, NAD or NADP as acc…		11935326,12297006,12477932,12690205,1332063,14638692,15389771,15489334,15712224,15826505,15946682,16263718,16442803,16584639,17171578,17404228,17960497,19405953,1993704,2055113,2188967,3278312,3693355,6897145,8125298,8406489,8506365,8619544,8968745,9040023,9373149,9727038,9934985,
1892	Echs1,	enoyl Coenzyme A hydratase, short chain, 1, mitochondrial	4.2.1.17,				hsa00062:Fatty acid elongation in mitochondria,hsa00071:Fatty acid metabolism,hsa00280:Valine, leucine and isoleucine degradation,hsa00310:Lysine degradation,hsa00380:Tryptophan metabolism,hsa00410:beta-Alanine metabolism,hsa00640:Propanoate metabolism,hsa00650:Butanoate metabolism,hsa00903:Limonene and pinene degradation,	GO:0004300~enoyl-CoA hydratase activity,GO:0016836~hydro-lyase activity,		11271497,12358155,12477932,1286669,13295248,15164054,15489334,1602151,16130169,17353931,17395278,1988037,7669045,8012501,9073515,
1962	EHHADH,	enoyl-Coenzyme A, hydratase/3-hydroxyacyl Coenzyme A dehydrogenase	1.1.1.35,4.2.1.17,5.3.3.8,				hsa00071:Fatty acid metabolism,hsa00280:Valine, leucine and isoleucine degradation,hsa00310:Lysine degradation,hsa00380:Tryptophan metabolism,hsa00410:beta-Alanine metabolism,hsa00640:Propanoate metabolism,hsa00650:Butanoate metabolism,hsa00903:Limonene and pinene degradation,hsa03320:PPAR signaling pathway,	GO:0003857~3-hydroxyacyl-CoA dehydrogenase activity,GO:0004165~dodecenoyl-CoA delta-isomerase activity,GO:0004300~enoyl-CoA hydratase activity,GO:0016836~hydro-lyase activity,GO:0016860~intramolecular oxidoreductase activity,GO:0016863~intramolecular oxidoreductase activity, transposing C=C bonds,GO:0048037~cofactor binding,GO:0050662~coenzyme binding,		11451959,12477932,15489334,1651711,17287340,18660489,19240061,8125298,8188243,9185222,9373149,
2194	FASN,	fatty acid synthase	1.1.1.100,1.3.1.10,2.3.1.38,2.3.1.39,2.3.1.41,2.3.1.85,3.1.2.14,4.2.1.61,				hsa00061:Fatty acid biosynthesis,hsa04910:Insulin signaling pathway,	GO:0000036~acyl carrier activity,GO:0004312~fatty-acid synthase activity,GO:0004313~[acyl-carrier-protein] S-acetyltransferase activity,GO:0004314~[acyl-carrier-protein] S-malonyltransferase activity,GO:0004315~3-oxoacyl-[acyl-carrier-protein] synthase activity,GO:0004316~3-oxoacyl-[acyl-carrier-protein] reductase activity,GO:0004317~3-hydroxypalmitoyl-[acyl-carrier-protein] dehydratase activity,…		1044453,10769045,11018265,11034606,11248039,11756679,11790787,12060737,12213084,12477932,12515624,12531699,12646257,12815048,12839976,12882974,12939396,14689581,15047835,15113941,15220220,15235125,15254710,15302935,15489334,15507492,15523670,15669079,15897909,16175090,16215233,16582625,16625196,16644689,16806233,16894240,16964243,17081065,17081983,17188392,17220478,17492427,17618104,17618296,1763…
2271	FH,	fumarate hydratase	4.2.1.2,	Fumarase deficiency,Leiomyomatosis and renal cell cancer,Multiple cutaneous and uterine leiomyomata,	cutaneous and uterine leiomyomata,hereditary leiomyomatosis,leiomyoma,		hsa00020:Citrate cycle (TCA cycle),hsa05200:Pathways in cancer,hsa05211:Renal cell carcinoma,	GO:0004333~fumarate hydratase activity,GO:0016836~hydro-lyase activity,		11865300,12021453,12177782,12477932,12612654,12772087,14632190,15334541,15489334,15724016,15937070,16098467,16237213,16319128,16477632,16597677,16639410,16757530,16774737,16881969,17476294,17908262,17960613,18083107,18257390,18313410,18503824,18514489,18728283,18986479,19075141,19151755,19276158,2759092,3828494,4018793,434773,8200987,9635293,975868,
10020	gne,	glucosamine (UDP-N-acetyl)-2-epimerase/N-acetylmannosamine kinase	2.7.1.60,5.1.3.14,	Inclusion body myopathy, autosomal recessive,Nonaka myopathy,Sialuria,			hsa00520:Amino sugar and nucleotide sugar metabolism,	GO:0000166~nucleotide binding,GO:0001882~nucleoside binding,GO:0001883~purine nucleoside binding,GO:0005524~ATP binding,GO:0008761~UDP-N-acetylglucosamine 2-epimerase activity,GO:0009384~N-acylmannosamine kinase activity,GO:0016854~racemase and epimerase activity,GO:0016857~racemase and epimerase activity, acting on carbohydrates and derivatives,GO:0017076~purine nucleotide binding,GO:0019200~car…		10330343,10334995,10356312,10431835,11326336,11528398,11749051,11916006,12177386,12325084,12409274,12473753,12473769,12473780,12477932,12497639,12612874,12743242,12811782,12913203,12921793,12927803,14702039,14707127,14972325,15136692,15146476,15164053,15342556,15489334,15670773,15748884,15833430,15987957,16810679,16847058,17164266,17597614,17698786,17704511,17718674,18029348,18373408,18560563,186…
10007	gnpda1,	glucosamine-6-phosphate deaminase 1	3.5.99.6,				hsa00520:Amino sugar and nucleotide sugar metabolism,	GO:0004342~glucosamine-6-phosphate deaminase activity,GO:0016860~intramolecular oxidoreductase activity,GO:0016861~intramolecular oxidoreductase activity, interconverting aldoses and ketoses,GO:0019239~deaminase activity,		10964516,12477932,12616532,12965206,14702039,15372022,15489334,16189514,16344560,18029348,7577655,7584044,8747459,9438414,9714720,
132789	Gnpda2,	glucosamine-6-phosphate deaminase 2	3.5.99.6,	Six new loci associated with body mass index highlight a neuronal influence on body weight regulation,			hsa00520:Amino sugar and nucleotide sugar metabolism,	GO:0004342~glucosamine-6-phosphate deaminase activity,GO:0016860~intramolecular oxidoreductase activity,GO:0016861~intramolecular oxidoreductase activity, interconverting aldoses and ketoses,GO:0019239~deaminase activity,		12477932,12616532,12965206,14702039,15489334,17974005,18029348,19079261,19164386,
2821	GPI,	glucose phosphate isomerase	5.3.1.9,	Hemolytic anemia due to glucosephosphate isomerase deficiency,Hydrops fetalis, one form,	hereditary nonspherocytic hemolytic anemia (HNSHA).,	env:Envelope surface glycoprotein gp120,	hsa00010:Glycolysis / Gluconeogenesis,hsa00030:Pentose phosphate pathway,hsa00500:Starch and sucrose metabolism,hsa00520:Amino sugar and nucleotide sugar metabolism,	GO:0004347~glucose-6-phosphate isomerase activity,GO:0005125~cytokine activity,GO:0008083~growth factor activity,GO:0016860~intramolecular oxidoreductase activity,GO:0016861~intramolecular oxidoreductase activity, interconverting aldoses and ketoses,	2547084,	10216265,10727272,10916680,11004567,11264592,11371164,11418246,11431735,11437381,11688991,11896391,11896393,12054796,12163179,12477932,12517804,12527360,12573240,12737943,12777791,12783864,14566819,14715248,15034067,15059907,15290745,15369782,15489334,15570012,15637053,15850830,16563432,16949042,17041899,17071500,17690101,17925402,18311788,18485900,18669648,19064002,2387591,2544027,2547084,302069…
2746	glud1,	glutamate dehydrogenase 1	1.4.1.3,	Hyperinsulinism-hyperammonemia syndrome,			hsa00250:Alanine, aspartate and glutamate metabolism,hsa00330:Arginine and proline metabolism,hsa00471:D-Glutamine and D-glutamate metabolism,hsa00910:Nitrogen metabolism,	GO:0000166~nucleotide binding,GO:0001882~nucleoside binding,GO:0001883~purine nucleoside binding,GO:0004352~glutamate dehydrogenase activity,GO:0004353~glutamate dehydrogenase [NAD(P)+] activity,GO:0005524~ATP binding,GO:0005525~GTP binding,GO:0016597~amino acid binding,GO:0016638~oxidoreductase activity, acting on the CH-NH2 group of donors,GO:0016639~oxidoreductase activity, acting on the CH-NH…		10338089,10636977,11214910,11254391,11297618,11840195,11872671,11903050,11950837,12022886,12054821,12193607,12324473,12477932,12653548,1286669,14702039,14743216,14760703,15044002,15164054,15273247,15378063,15489334,15578726,15609325,15750346,16151898,16492972,18321734,18688271,19046183,19046187,19156168,2757358,3368458,3377777,3399399,3426581,3585334,3997814,429360,6121377,8125298,8244384,8314555…
2747	GLUD2,	glutamate dehydrogenase 2	1.4.1.3,				hsa00250:Alanine, aspartate and glutamate metabolism,hsa00330:Arginine and proline metabolism,hsa00471:D-Glutamine and D-glutamate metabolism,hsa00910:Nitrogen metabolism,	GO:0000166~nucleotide binding,GO:0001882~nucleoside binding,GO:0001883~purine nucleoside binding,GO:0004352~glutamate dehydrogenase activity,GO:0004353~glutamate dehydrogenase [NAD(P)+] activity,GO:0005525~GTP binding,GO:0016597~amino acid binding,GO:0016638~oxidoreductase activity, acting on the CH-NH2 group of donors,GO:0016639~oxidoreductase activity, acting on the CH-NH2 group of donors, NAD …		11950837,11999891,12054821,12477932,14702039,15044002,15378063,15489334,15578726,15750346,15772651,15952740,16169070,17924438,18688271,19156168,2365355,8207021,8288265,8486350,9109504,9674910,
2752	GLUL,	glutamate-ammonia ligase (glutamine synthetase)	6.3.1.2,	Glutamine deficiency, congenital,	schizophrenia,		hsa00250:Alanine, aspartate and glutamate metabolism,hsa00330:Arginine and proline metabolism,hsa00910:Nitrogen metabolism,	GO:0000166~nucleotide binding,GO:0001882~nucleoside binding,GO:0001883~purine nucleoside binding,GO:0004356~glutamate-ammonia ligase activity,GO:0005524~ATP binding,GO:0016211~ammonia ligase activity,GO:0016879~ligase activity, forming carbon-nitrogen bonds,GO:0016880~acid-ammonia (or amide) ligase activity,GO:0017076~purine nucleotide binding,GO:0030554~adenyl nucleotide binding,GO:0032553~ribon…		10520940,10681395,12160938,12387715,12477932,14702039,14760703,15231748,15489334,15642443,16095760,16189514,16267323,16537434,16609938,16710414,1681907,17197094,17627080,17974005,18005987,18029348,18192886,18555765,18662667,19125103,19156168,19204801,2856920,2888076,7909780,7923146,8921392,8975719,9107685,9260745,9263280,
2805	GOT1,	glutamic-oxaloacetic transaminase 1, soluble (aspartate aminotransferase 1)	2.6.1.1,				hsa00250:Alanine, aspartate and glutamate metabolism,hsa00270:Cysteine and methionine metabolism,hsa00330:Arginine and proline metabolism,hsa00350:Tyrosine metabolism,hsa00360:Phenylalanine metabolism,hsa00400:Phenylalanine, tyrosine and tryptophan biosynthesis,	GO:0004069~L-aspartate:2-oxoglutarate aminotransferase activity,GO:0004609~phosphatidylserine decarboxylase activity,GO:0008483~transaminase activity,GO:0016769~transferase activity, transferring nitrogenous groups,GO:0016831~carboxy-lyase activity,GO:0019842~vitamin binding,GO:0030170~pyridoxal phosphate binding,GO:0031406~carboxylic acid binding,GO:0048037~cofactor binding,GO:0070279~vitamin B6…		10360399,12477932,12480555,15164054,15306699,15489334,16344560,16681433,17907318,18083107,18242760,18752324,19012630,19370784,1974457,2182221,2225456,2241899,225064,2731362,2777255,3207426,6391741,6397370,7060339,8349677,8396422,8619474,9110174,
2936	gsr,	glutathione reductase	1.8.1.7,	Hemolytic anemia due to glutathione reductase deficiency,	breast cancer,sickle cell and thalassaemia genes,		hsa00480:Glutathione metabolism,	GO:0000166~nucleotide binding,GO:0001882~nucleoside binding,GO:0001883~purine nucleoside binding,GO:0004362~glutathione-disulfide reductase activity,GO:0009055~electron carrier activity,GO:0015036~disulfide oxidoreductase activity,GO:0015037~peptide disulfide oxidoreductase activity,GO:0015038~glutathione disulfide oxidoreductase activity,GO:0016209~antioxidant activity,GO:0016651~oxidoreductase …		10708558,11204445,11273669,11705998,11710935,12095224,12447480,12477932,12516882,12533953,12630007,12826156,12838767,12838770,12901426,14637279,15149466,15489334,15592455,15978628,16169070,16421571,16424062,16493712,16868544,16910673,17206382,17601350,18341267,18638483,18977241,19124506,19377255,2185014,2306116,2379581,2585516,302667,3338461,3656429,4043983,6822532,7060551,7060551],7334521,766397…
2987	GUK1,	guanylate kinase 1	2.7.4.8,				hsa00230:Purine metabolism,	GO:0000166~nucleotide binding,GO:0001882~nucleoside binding,GO:0001883~purine nucleoside binding,GO:0004385~guanylate kinase activity,GO:0005524~ATP binding,GO:0016776~phosphotransferase activity, phosphate group as acceptor,GO:0017076~purine nucleotide binding,GO:0019201~nucleotide kinase activity,GO:0019205~nucleobase, nucleoside, nucleotide kinase activity,GO:0019206~nucleoside kinase activity…		12107411,12477932,15489334,16341674,16832584,211390,2164269,6249178,6260205,8647247,8663313,
3033	hadh,	hydroxyacyl-Coenzyme A dehydrogenase	1.1.1.35,	3-hydroxyacyl-CoA dehydrogenase deficiency,Hyperinsulinemic hypoglycemia, familial, 4,	diabetes, type 2,		hsa00062:Fatty acid elongation in mitochondria,hsa00071:Fatty acid metabolism,hsa00280:Valine, leucine and isoleucine degradation,hsa00310:Lysine degradation,hsa00380:Tryptophan metabolism,hsa00650:Butanoate metabolism,	GO:0003857~3-hydroxyacyl-CoA dehydrogenase activity,GO:0048037~cofactor binding,GO:0050662~coenzyme binding,		10231530,10347277,10840044,10931422,11256614,11451959,11489939,12477932,14693719,14702039,15489334,16176262,16344560,17065362,1835339,19318379,8687463,8825408,8889548,9716664,975867,
3030	HADHA,	hydroxyacyl-Coenzyme A dehydrogenase/3-ketoacyl-Coenzyme A thiolase/enoyl-Coenzyme A hydratase (trifunctional protein), alpha subunit	1.1.1.211,4.2.1.17,	Fatty liver, acute, of pregnancy,HELLP syndrome, maternal, of pregnancy,LCHAD deficiency,Trifunctional protein deficiency,Trifunctional protein deficiency, type 1,	HELLP syndrome,HELLP syndrome; acute fatty liver of pregnancy,preeclampsia,		hsa00062:Fatty acid elongation in mitochondria,hsa00071:Fatty acid metabolism,hsa00280:Valine, leucine and isoleucine degradation,hsa00310:Lysine degradation,hsa00380:Tryptophan metabolism,hsa00410:beta-Alanine metabolism,hsa00640:Propanoate metabolism,hsa00650:Butanoate metabolism,hsa00903:Limonene and pinene degradation,hsa01040:Biosynthesis of unsaturated fatty acids,	GO:0000062~acyl-CoA binding,GO:0000166~nucleotide binding,GO:0003857~3-hydroxyacyl-CoA dehydrogenase activity,GO:0003985~acetyl-CoA C-acetyltransferase activity,GO:0003988~acetyl-CoA C-acyltransferase activity,GO:0004300~enoyl-CoA hydratase activity,GO:0005504~fatty acid binding,GO:0008289~lipid binding,GO:0016407~acetyltransferase activity,GO:0016408~C-acyltransferase activity,GO:0016453~C-acety…		10075708,11978893,12118083,12413376,12477932,12754706,12971430,14630990,15146197,15347768,15489334,1550553,15952740,17081983,17143551,17199921,17313315,18031367,18045290,18063578,18485779,18676680,7738175,7811722,7846063,7918661,7958339,8135828,8163672,8770876,8865274,8921383,9003853,9266371,9605857,9739053,
3032	hadhb,	hydroxyacyl-Coenzyme A dehydrogenase/3-ketoacyl-Coenzyme A thiolase/enoyl-Coenzyme A hydratase (trifunctional protein), beta subunit	2.3.1.16,	Trifunctional protein deficiency,Trifunctional protein deficiency, type II,			hsa00062:Fatty acid elongation in mitochondria,hsa00071:Fatty acid metabolism,hsa00280:Valine, leucine and isoleucine degradation,	GO:0000062~acyl-CoA binding,GO:0000166~nucleotide binding,GO:0003857~3-hydroxyacyl-CoA dehydrogenase activity,GO:0003988~acetyl-CoA C-acyltransferase activity,GO:0004300~enoyl-CoA hydratase activity,GO:0005504~fatty acid binding,GO:0008289~lipid binding,GO:0016408~C-acyltransferase activity,GO:0016508~long-chain-enoyl-CoA hydratase activity,GO:0016509~long-chain-3-hydroxyacyl-CoA dehydrogenase ac…		12477932,12665801,12721663,12754706,12933794,14630990,14702039,15242332,15489334,1550553,15815621,16344560,16959974,17199921,18063578,7958339,8135828,8163672,8651282,8921383,9259266,9605857,9739053,
3028	HSD17B10,	hydroxysteroid (17-beta) dehydrogenase 10	1.1.1.178,1.1.1.35,	2-methyl-3-hydroxybutyryl-CoA dehydrogenase deficiency,Chorioathetosis with mental retardation and abnormal behavior,Mental retardation, X-linked 17/31, microduplication,Mental retardation, X-linked syndromic 10,			hsa00280:Valine, leucine and isoleucine degradation,hsa05010:Alzheimer's disease,	GO:0000166~nucleotide binding,GO:0001540~beta-amyloid binding,GO:0003857~3-hydroxyacyl-CoA dehydrogenase activity,GO:0004303~estradiol 17-beta-dehydrogenase activity,GO:0005496~steroid binding,GO:0008289~lipid binding,GO:0008709~7-alpha-hydroxysteroid dehydrogenase activity,GO:0016229~steroid dehydrogenase activity,GO:0018454~acetoacetyl-CoA reductase activity,GO:0033764~steroid dehydrogenase act…		10329704,10371197,10600649,11403151,11430884,11559359,11869808,12477932,12696021,12917011,14672739,15087549,15342248,15489334,15665036,15804423,16021519,16148061,16176262,16344560,16899120,17236142,17618155,17707551,17917077,18252223,18765932,18984158,19027726,19343046,19422801,8687463,9061028,9338779,9553139,9671743,9712734,9851691,9861020,9890977,
10449	ACAA2,LOC648603,	hypothetical LOC648603; acetyl-Coenzyme A acyltransferase 2	2.3.1.16,	Six new loci associated with blood low-density lipoprotein cholesterol, high-density lipoprotein cholesterol or triglycerides in humans,			hsa00062:Fatty acid elongation in mitochondria,hsa00071:Fatty acid metabolism,hsa00280:Valine, leucine and isoleucine degradation,	GO:0003988~acetyl-CoA C-acyltransferase activity,GO:0016408~C-acyltransferase activity,		10856712,12477932,14702039,15242332,15489334,18193044,18371312,18669648,8125298,8241273,9373149,
3658	IREB2,	iron-responsive element binding protein 2			Alzheimer's Disease,Parkinson's disease,			GO:0003723~RNA binding,GO:0003729~mRNA binding,GO:0005506~iron ion binding,GO:0030350~iron-responsive element binding,GO:0043167~ion binding,GO:0043169~cation binding,GO:0046872~metal ion binding,GO:0046914~transition metal ion binding,GO:0051536~iron-sulfur cluster binding,GO:0051539~4 iron, 4 sulfur cluster binding,GO:0051540~metal cluster binding,		11783942,12192037,12200453,12465072,12477932,12855587,12888568,1421965,14673166,15057521,15146197,15489334,15777842,15938636,16503547,16914832,17200797,17604281,17613866,17760563,17822790,18574241,18582596,18669648,19223469,2172968,7489724,7523370,7622457,7983023,
3418	IDH2,	isocitrate dehydrogenase 2 (NADP+), mitochondrial	1.1.1.42,				hsa00020:Citrate cycle (TCA cycle),hsa00480:Glutathione metabolism,	GO:0000166~nucleotide binding,GO:0000287~magnesium ion binding,GO:0004448~isocitrate dehydrogenase activity,GO:0004450~isocitrate dehydrogenase (NADP+) activity,GO:0030145~manganese ion binding,GO:0043167~ion binding,GO:0043169~cation binding,GO:0046872~metal ion binding,GO:0046914~transition metal ion binding,GO:0048037~cofactor binding,GO:0050662~coenzyme binding,GO:0051287~NAD or NADH binding,		11969,12477932,12665801,15489334,16396496,17854715,18096511,18484410,19228619,3363531,564083,752528,8125298,8707889,8954790,9373149,965003,970033,
51557	LGSN,	lengsin, lens protein with glutamine synthetase domain	1.4.1.3,					GO:0004356~glutamate-ammonia ligase activity,GO:0016211~ammonia ligase activity,GO:0016879~ligase activity, forming carbon-nitrogen bonds,GO:0016880~acid-ammonia (or amide) ligase activity,		12107412,12107413,12477932,14574404,15489334,16005676,16273301,17010935,17161372,
4200	ME2,	malic enzyme 2, NAD(+)-dependent, mitochondrial	1.1.1.38,	Epilepsy, idopathic generalized, susceptibility to,	epilepsy, idiopathic generalized,		hsa00620:Pyruvate metabolism,	GO:0000166~nucleotide binding,GO:0004470~malic enzyme activity,GO:0004471~malate dehydrogenase (decarboxylating) activity,GO:0009055~electron carrier activity,GO:0016615~malate dehydrogenase activity,GO:0016619~malate dehydrogenase (oxaloacetate-decarboxylating) activity,GO:0043167~ion binding,GO:0043169~cation binding,GO:0046872~metal ion binding,GO:0048037~cofactor binding,GO:0050662~coenzyme b…		10467136,10477256,10700286,10913357,11358520,11401430,12121650,12477932,12665801,12962632,14760703,15489334,15532013,16171388,16190936,16344560,17418816,17638511,19066393,1993674,3689803,511162,680703,7496989,7757881,
4522	mthfd1,	methylenetetrahydrofolate dehydrogenase (NADP+ dependent) 1, methenyltetrahydrofolate cyclohydrolase, formyltetrahydrofolate synthetase	1.5.1.5,3.5.4.9,6.3.4.3,	Abruptio placentae, susceptibility to,Spina bifida, folate-sensitive, susceptibility to,	abruptio placentae,bipolar disorder schizophrenia,breast cancer,breast cancer estrogen progesterone,cervical artery dissection, spontaneous,cleft lip with cleft palate cleft lip without cleft palate,colorectal cancer,colorectal cancer; folate, erythrocyte,drug hypersensitivity,folate; homocysteine,heart anomalies, congenital,leukemia,lung cancer,migraine,neural tube defects,omphalocele,pregnancy …		hsa00630:Glyoxylate and dicarboxylate metabolism,hsa00670:One carbon pool by folate,	GO:0000166~nucleotide binding,GO:0001882~nucleoside binding,GO:0001883~purine nucleoside binding,GO:0004329~formate-tetrahydrofolate ligase activity,GO:0004477~methenyltetrahydrofolate cyclohydrolase activity,GO:0004486~methylenetetrahydrofolate dehydrogenase activity,GO:0004488~methylenetetrahydrofolate dehydrogenase (NADP+) activity,GO:0005524~ATP binding,GO:0016155~formyltetrahydrofolate dehyd…		10828945,12015164,12384833,12477932,12665801,14632302,14647408,15122597,15489334,15503105,15633187,15719048,15797993,15861780,15937947,15953655,16123074,16236726,16315005,16328059,16552426,16712703,17000706,17035141,17114913,17353931,17417062,17436311,17438114,17449906,17530705,17533396,17548676,17691219,17894836,18221821,18261183,18277167,18427977,18635682,18767138,18771981,18801628,18818748,189…
10797	mthfd2,	methylenetetrahydrofolate dehydrogenase (NADP+ dependent) 2, methenyltetrahydrofolate cyclohydrolase	1.5.1.15,3.5.4.9,				hsa00630:Glyoxylate and dicarboxylate metabolism,hsa00670:One carbon pool by folate,	GO:0000287~magnesium ion binding,GO:0004477~methenyltetrahydrofolate cyclohydrolase activity,GO:0004486~methylenetetrahydrofolate dehydrogenase activity,GO:0004487~methylenetetrahydrofolate dehydrogenase (NAD+) activity,GO:0004488~methylenetetrahydrofolate dehydrogenase (NADP+) activity,GO:0016645~oxidoreductase activity, acting on the CH-NH group of donors,GO:0016646~oxidoreductase activity, act…		12477932,15489334,15815621,16344560,18676680,18830263,19048631,19161160,2587219,8125298,8218174,8939898,9373149,9454603,
441024	Mthfd2l,	methylenetetrahydrofolate dehydrogenase (NADP+ dependent) 2-like	1.5.1.15,3.5.4.9,					GO:0000287~magnesium ion binding,GO:0004477~methenyltetrahydrofolate cyclohydrolase activity,GO:0004486~methylenetetrahydrofolate dehydrogenase activity,GO:0004487~methylenetetrahydrofolate dehydrogenase (NAD+) activity,GO:0016645~oxidoreductase activity, acting on the CH-NH group of donors,GO:0016646~oxidoreductase activity, acting on the CH-NH group of donors, NAD or NADP as acceptor,GO:0016814…		12477932,14702039,15489334,15815621,
4831, 4830	Nme1,NME1-NME2,NME2,	non-metastatic cells 1, protein (NM23A) expressed in; NME1-NME2 readthrough transcript; non-metastatic cells 2, protein (NM23B) expressed in	2.7.4.6,	Neuroblastoma,	breast cancer,colorectal cancer,lymph node involvement and other histopathological indicators of high metastatic potential,		hsa00230:Purine metabolism,hsa00240:Pyrimidine metabolism,	GO:0000166~nucleotide binding,GO:0000287~magnesium ion binding,GO:0001882~nucleoside binding,GO:0001883~purine nucleoside binding,GO:0003677~DNA binding,GO:0003700~transcription factor activity,GO:0004518~nuclease activity,GO:0004536~deoxyribonuclease activity,GO:0004550~nucleoside diphosphate kinase activity,GO:0005524~ATP binding,GO:0005525~GTP binding,GO:0008092~cytoskeletal protein binding,GO…		10512675,10602478,10611312,10618642,11042679,11082283,11274357,11280768,11319942,11555662,11687967,11726210,11776896,11835509,11872741,11918081,11919189,11935309,11960382,11963831,11998956,12007505,12009894,12105213,12135660,12137595,12163590,12174914,12200143,12405283,12452062,12474051,12477932,12486122,12486123,12490715,12524539,12601555,12624546,12628186,12669312,12684753,12859952,12883690,129…
4832	nme3,	non-metastatic cells 3, protein expressed in	2.7.4.6,				hsa00230:Purine metabolism,hsa00240:Pyrimidine metabolism,	GO:0000166~nucleotide binding,GO:0000287~magnesium ion binding,GO:0001882~nucleoside binding,GO:0001883~purine nucleoside binding,GO:0004550~nucleoside diphosphate kinase activity,GO:0005524~ATP binding,GO:0016776~phosphotransferase activity, phosphate group as acceptor,GO:0017076~purine nucleotide binding,GO:0019205~nucleobase, nucleoside, nucleotide kinase activity,GO:0030554~adenyl nucleotide …		11042679,11157797,11277919,12477932,15489334,16169070,16189514,16537434,16713569,17900511,7638209,9067290,
10201	Nme6,	non-metastatic cells 6, protein expressed in (nucleoside-diphosphate kinase)	2.7.4.6,				hsa00230:Purine metabolism,hsa00240:Pyrimidine metabolism,	GO:0000166~nucleotide binding,GO:0000287~magnesium ion binding,GO:0001882~nucleoside binding,GO:0001883~purine nucleoside binding,GO:0004550~nucleoside diphosphate kinase activity,GO:0005524~ATP binding,GO:0016776~phosphotransferase activity, phosphate group as acceptor,GO:0017076~purine nucleotide binding,GO:0019205~nucleobase, nucleoside, nucleotide kinase activity,GO:0030554~adenyl nucleotide …		10453732,10618642,12477932,14702039,15489334,16641997,8125298,9373149,
29922	NME7,	non-metastatic cells 7, protein expressed in (nucleoside-diphosphate kinase)	2.7.4.6,				hsa00230:Purine metabolism,hsa00240:Pyrimidine metabolism,	GO:0000166~nucleotide binding,GO:0000287~magnesium ion binding,GO:0001882~nucleoside binding,GO:0001883~purine nucleoside binding,GO:0004550~nucleoside diphosphate kinase activity,GO:0005524~ATP binding,GO:0016776~phosphotransferase activity, phosphate group as acceptor,GO:0017076~purine nucleotide binding,GO:0019205~nucleobase, nucleoside, nucleotide kinase activity,GO:0030554~adenyl nucleotide …		11768308,12477932,14702039,15489334,16189514,16710414,17363702,19064610,19240061,
4860	pnp,	nucleoside phosphorylase	2.4.2.1,	Nucleoside phosphorylase deficiency, immunodeficiency due to,	Alzheimer's disease cognitive function,		hsa00230:Purine metabolism,hsa00240:Pyrimidine metabolism,hsa00760:Nicotinate and nicotinamide metabolism,	GO:0001882~nucleoside binding,GO:0002054~nucleobase binding,GO:0002060~purine binding,GO:0004731~purine-nucleoside phosphorylase activity,GO:0008144~drug binding,GO:0016763~transferase activity, transferring pentosyl groups,GO:0042301~phosphate binding,GO:0043167~ion binding,GO:0043168~anion binding,		100152,10884411,11453975,11964161,12068295,12180982,12477932,12914785,12914786,12928150,13679061,13679062,1384322,14680831,14702039,14706628,14982926,15047506,15489334,15571269,15582582,1560016,15983407,16154528,16169070,16930574,16964310,17221831,17407325,1763067,17639373,18281956,18281957,18790691,18938130,18946041,19001417,19191546,1923769,1931007,2104852,3029074,6087295,6771276,8931706,906775…
4967	Ogdh,	oxoglutarate (alpha-ketoglutarate) dehydrogenase (lipoamide)	1.2.4.2,	Alpha-ketoglutarate dehydrogenase deficiency,			hsa00020:Citrate cycle (TCA cycle),hsa00310:Lysine degradation,hsa00380:Tryptophan metabolism,	GO:0004591~oxoglutarate dehydrogenase (succinyl-transferring) activity,GO:0016620~oxidoreductase activity, acting on the aldehyde or oxo group of donors, NAD or NADP as acceptor,GO:0016624~oxidoreductase activity, acting on the aldehyde or oxo group of donors, disulfide as acceptor,GO:0019842~vitamin binding,GO:0030976~thiamin pyrophosphate binding,GO:0034601~oxoglutarate dehydrogenase [NAD(P)+] …		12477932,12853948,1542694,15466852,15489334,15649899,16189514,16344560,17343268,17370265,18973345,2188967,7622061,8020988,9727038,9847074,
55753	Ogdhl,	oxoglutarate dehydrogenase-like	1.2.4.-,				hsa00020:Citrate cycle (TCA cycle),hsa00310:Lysine degradation,hsa00380:Tryptophan metabolism,	GO:0004591~oxoglutarate dehydrogenase (succinyl-transferring) activity,GO:0016624~oxidoreductase activity, acting on the aldehyde or oxo group of donors, disulfide as acceptor,GO:0019842~vitamin binding,GO:0030976~thiamin pyrophosphate binding,GO:0048037~cofactor binding,GO:0050662~coenzyme binding,		10574462,12477932,14702039,15342556,15489334,16344560,18004749,8125298,9373149,
5236	pgm1,	phosphoglucomutase 1	5.4.2.2,		atherosclerosis, coronary; tuberculosis,diabetes, type 1,tuberculosis,		hsa00010:Glycolysis / Gluconeogenesis,hsa00030:Pentose phosphate pathway,hsa00052:Galactose metabolism,hsa00500:Starch and sucrose metabolism,hsa00520:Amino sugar and nucleotide sugar metabolism,	GO:0000287~magnesium ion binding,GO:0004614~phosphoglucomutase activity,GO:0016866~intramolecular transferase activity,GO:0016868~intramolecular transferase activity, phosphotransferases,GO:0043167~ion binding,GO:0043169~cation binding,GO:0046872~metal ion binding,		10441333,11771313,11785295,11963573,12477932,12608294,12942785,1530890,15378030,15489334,15522220,1602151,16710414,17924679,18091362,18187866,18495743,18669648,3159642,4517931,621091,7902567,7902568,8257433,8586438,8631316,8894274,
5223	pgam1,	phosphoglycerate mutase 1 (brain)	3.1.3.13,5.4.2.1,5.4.2.4,				hsa00010:Glycolysis / Gluconeogenesis,	GO:0004082~bisphosphoglycerate mutase activity,GO:0004083~2,3-bisphospho-D-glycerate 2-phosphohydrolase activity,GO:0004619~phosphoglycerate mutase activity,GO:0016791~phosphatase activity,GO:0016866~intramolecular transferase activity,GO:0016868~intramolecular transferase activity, phosphotransferases,GO:0019899~enzyme binding,GO:0019900~kinase binding,GO:0019901~protein kinase binding,GO:003441…		12189148,12477932,14702039,15388943,15489334,15592455,15710582,15883004,16169070,16881065,18083107,18669648,19405953,2822696,2846553,2846554,6282177,8125298,8619474,9110174,9150946,9373149,
5224	PGAM2,	phosphoglycerate mutase 2 (muscle)	3.1.3.13,5.4.2.1,5.4.2.4,	Myopathy due to phosphoglycerate mutase deficiency,			hsa00010:Glycolysis / Gluconeogenesis,	GO:0004082~bisphosphoglycerate mutase activity,GO:0004083~2,3-bisphospho-D-glycerate 2-phosphohydrolase activity,GO:0004619~phosphoglycerate mutase activity,GO:0016791~phosphatase activity,GO:0016866~intramolecular transferase activity,GO:0016868~intramolecular transferase activity, phosphotransferases,GO:0034416~bisphosphoglycerate phosphatase activity,GO:0046538~2,3-bisphosphoglycerate-dependen…		10545043,12477932,15489334,17370265,2145198,2153628,2549058,2822696,6262916,8447317,
5320	Pla2g2a,	phospholipase A2, group IIA (platelets, synovial fluid)	3.1.1.4,	Colorectal cancer, sporadic,	affective disorder,cholesterol, LDL sPLA2-IIA mass,colorectal cancer,coronary artery disease risk factors,familial adenomatous polyposis,schizophrenia,	env:Envelope surface glycoprotein gp120,	hsa00564:Glycerophospholipid metabolism,hsa00565:Ether lipid metabolism,hsa00590:Arachidonic acid metabolism,hsa00591:Linoleic acid metabolism,hsa00592:alpha-Linolenic acid metabolism,hsa04010:MAPK signaling pathway,hsa04270:Vascular smooth muscle contraction,hsa04370:VEGF signaling pathway,hsa04664:Fc epsilon RI signaling pathway,hsa04730:Long-term depression,hsa04912:GnRH signaling pathway,	GO:0004091~carboxylesterase activity,GO:0004620~phospholipase activity,GO:0004623~phospholipase A2 activity,GO:0005509~calcium ion binding,GO:0005543~phospholipid binding,GO:0008289~lipid binding,GO:0016298~lipase activity,GO:0043167~ion binding,GO:0043169~cation binding,GO:0046872~metal ion binding,GO:0047498~calcium-dependent phospholipase A2 activity,	9377118,9745929,	10747008,10771478,11076863,11256614,11752212,11839587,11903045,12085323,12244093,12359734,12456890,12477932,12501175,12574380,12616631,12626587,12694401,12773489,14499668,14639048,15007070,15259375,15299314,15318030,15489334,15489336,15576846,15688033,15802623,15897607,15964894,16177112,16253130,16278219,16368710,16381901,16461407,16585943,16603549,16617059,16710414,17029400,17069818,17164967,172…
8398	pla2g6,	phospholipase A2, group VI (cytosolic, calcium-independent)	3.1.1.4,	Infantile neuroaxonal dystrophy 1,Karak syndrome,Neurodegeneration with brain iron accumulation,	schizophrenia,	env:Envelope surface glycoprotein gp120,	hsa00564:Glycerophospholipid metabolism,hsa00565:Ether lipid metabolism,hsa00590:Arachidonic acid metabolism,hsa00591:Linoleic acid metabolism,hsa00592:alpha-Linolenic acid metabolism,hsa04010:MAPK signaling pathway,hsa04270:Vascular smooth muscle contraction,hsa04370:VEGF signaling pathway,hsa04664:Fc epsilon RI signaling pathway,hsa04666:Fc gamma R-mediated phagocytosis,hsa04730:Long-term depre…	GO:0004091~carboxylesterase activity,GO:0004620~phospholipase activity,GO:0004623~phospholipase A2 activity,GO:0016298~lipase activity,GO:0047499~calcium-independent phospholipase A2 activity,	9377118,9745929,	10092647,10336645,10591208,12208880,12423354,12477932,14634037,14702039,14749286,15007079,15052324,15249229,15252038,15318030,15364929,15385540,15461802,15489334,15573142,16585943,16783378,16799181,16943248,16966332,17003039,17033970,17082190,17188740,17254819,17275398,17459165,18029348,18208975,18562188,18570303,18676680,18775417,18790994,18799783,18826942,19059366,19138334,19225567,9079687,9377…
79717	PPCS,	phosphopantothenoylcysteine synthetase	6.3.2.5,				hsa00770:Pantothenate and CoA biosynthesis,	GO:0004632~phosphopantothenate--cysteine ligase activity,GO:0016879~ligase activity, forming carbon-nitrogen bonds,GO:0016881~acid-amino acid ligase activity,		11923312,12477932,12906824,14702039,15489334,16710414,
5464	PPA1,	pyrophosphatase (inorganic) 1	3.6.1.1,				hsa00190:Oxidative phosphorylation,	GO:0000287~magnesium ion binding,GO:0004427~inorganic diphosphatase activity,GO:0043167~ion binding,GO:0043169~cation binding,GO:0046872~metal ion binding,		10542310,10576771,10733883,10931946,12477932,15164054,15489334,16130169,16169070,16236267,16583711,16959974,17494625,4130389,6022858,6118133,6120771,6146563,656444,975879,
5831	Pycr1,	pyrroline-5-carboxylate reductase 1	1.5.1.2,				hsa00330:Arginine and proline metabolism,	GO:0004735~pyrroline-5-carboxylate reductase activity,GO:0016645~oxidoreductase activity, acting on the CH-NH group of donors,GO:0016646~oxidoreductase activity, acting on the CH-NH group of donors, NAD or NADP as acceptor,		11181995,12477932,15489334,16525639,16618798,16625196,16730026,17003781,1730675,19174463,212173,2722838,6201483,6253048,6894153,8125298,8880459,9373149,
5160	Pdha1,	pyruvate dehydrogenase (lipoamide) alpha 1	1.2.4.1,	Leigh syndrome, X-linked,pyruvate decarboxylase deficiency,Pyruvate dehydrogenase deficiency,			hsa00010:Glycolysis / Gluconeogenesis,hsa00020:Citrate cycle (TCA cycle),hsa00290:Valine, leucine and isoleucine biosynthesis,hsa00620:Pyruvate metabolism,hsa00650:Butanoate metabolism,	GO:0004738~pyruvate dehydrogenase activity,GO:0004739~pyruvate dehydrogenase (acetyl-transferring) activity,GO:0016624~oxidoreductase activity, acting on the aldehyde or oxo group of donors, disulfide as acceptor,		10077682,11485553,11486000,12477932,12651851,12676647,1293379,1301207,1338114,14638692,14708897,15302935,15489334,1551669,15861126,16169070,16344560,16713755,16967364,17065338,17081983,17353931,17474719,17487921,17947500,17957032,18023225,18083107,18088087,18220336,18398624,18691976,19081061,1909401,2227443,2537010,2737678,2745444,2748588,2828359,3034892,3422424,7545958,7573035,7757088,7782287,78…
5161	pdhA2,	pyruvate dehydrogenase (lipoamide) alpha 2	1.2.4.1,				hsa00010:Glycolysis / Gluconeogenesis,hsa00020:Citrate cycle (TCA cycle),hsa00290:Valine, leucine and isoleucine biosynthesis,hsa00620:Pyruvate metabolism,hsa00650:Butanoate metabolism,	GO:0004738~pyruvate dehydrogenase activity,GO:0004739~pyruvate dehydrogenase (acetyl-transferring) activity,GO:0016624~oxidoreductase activity, acting on the aldehyde or oxo group of donors, disulfide as acceptor,		10542321,11181995,11577086,11673873,12477932,14702039,15489334,1581363,17081983,18083107,18088087,18669648,2122529,2249846,7864652,
5162	pdhB,	pyruvate dehydrogenase (lipoamide) beta	1.2.4.1,	Pyruvate dehydrogenase E1-beta deficiency,			hsa00010:Glycolysis / Gluconeogenesis,hsa00020:Citrate cycle (TCA cycle),hsa00290:Valine, leucine and isoleucine biosynthesis,hsa00620:Pyruvate metabolism,hsa00650:Butanoate metabolism,	GO:0004738~pyruvate dehydrogenase activity,GO:0004739~pyruvate dehydrogenase (acetyl-transferring) activity,GO:0016624~oxidoreductase activity, acting on the aldehyde or oxo group of donors, disulfide as acceptor,		11076863,11230166,11577086,12477932,12651851,14638692,15138885,15489334,15489336,16381901,1702713,17474719,17923481,18164639,18206651,18468620,19081061,1967901,2295468,2323578,2376596,2377599,2829898,3422424,7864652,7895732,8125298,9373149,9824306,
8050	PDHX,	pyruvate dehydrogenase complex, component X		Lacticacidemia due to PDX1 deficiency,	diabetes, type 2,myocardial infarct,			GO:0031405~lipoic acid binding,GO:0031406~carboxylic acid binding,GO:0048037~cofactor binding,GO:0050662~coenzyme binding,		11756538,11935326,12372595,12477932,12573248,12816949,14638692,15277425,15489334,15896300,15979049,16189514,16263718,16282329,16344560,16442803,16566017,16629643,16843025,17024456,2112155,7864652,8584393,8619474,9110174,9242632,9399911,9467010,
5860	QDPR,	quinoid dihydropteridine reductase	1.5.1.34,	Hyperphenylalaninemia due to dihydropteridine reductase deficiency,Hyperphenylalaninemia, BH4-deficient, C,Phenylketonuria due to dihydropteridine reductase deficiency,			hsa00790:Folate biosynthesis,	GO:0004155~6,7-dihydropteridine reductase activity,GO:0009055~electron carrier activity,GO:0016645~oxidoreductase activity, acting on the CH-NH group of donors,GO:0016646~oxidoreductase activity, acting on the CH-NH group of donors, NAD or NADP as acceptor,		10408783,11076863,11153907,11256614,1160969,11937441,12477932,14718574,15009710,15489334,15489336,16341674,16381901,17188538,18444252,19027726,19405953,2116088,2330583,3031582,3033643,3587329,3666748,3711039,3718470,6746636,6797415,7627180,8125298,8137944,8262916,8326489,9373149,9427141,9744478,
93034	NT5C1B,RDH14,	retinol dehydrogenase 14 (all-trans/9-cis/11-cis); 5'-nucleotidase, cytosolic IB	1.1.1.-,3.1.3.5,				hsa00230:Purine metabolism,hsa00240:Pyrimidine metabolism,hsa00760:Nicotinate and nicotinamide metabolism,	GO:0000166~nucleotide binding,GO:0000287~magnesium ion binding,GO:0008252~nucleotidase activity,GO:0008253~5'-nucleotidase activity,GO:0016791~phosphatase activity,GO:0043167~ion binding,GO:0043169~cation binding,GO:0046872~metal ion binding,		11076863,11256614,11690631,12226107,12435598,12477932,12766061,12975309,14702039,15489334,15489336,15815621,16381901,19027726,
6470	SHMT1,	serine hydroxymethyltransferase 1 (soluble)	2.1.2.1,		bladder cancer,breast cancer,cardiovascular disease,colorectal cancer,colorectal cancer; folate, erythrocyte,drug hypersensitivity,esophageal cancer,esophageal cancer gastric cardiac cancer,head and neck cancer,hyperhomocysteinemia,leukemia, adult acute lymphocytic,lung cancer,lymphoma,lymphoma, non-Hodgkin,methotrexate toxicity,neural tube defects,non-Hodgkin's lymphoma,preterm delivery small-fo…		hsa00260:Glycine, serine and threonine metabolism,hsa00460:Cyanoamino acid metabolism,hsa00670:One carbon pool by folate,hsa00680:Methane metabolism,	GO:0004372~glycine hydroxymethyltransferase activity,GO:0004793~threonine aldolase activity,GO:0008732~L-allo-threonine aldolase activity,GO:0016597~amino acid binding,GO:0016832~aldehyde-lyase activity,GO:0019842~vitamin binding,GO:0030170~pyridoxal phosphate binding,GO:0031406~carboxylic acid binding,GO:0042802~identical protein binding,GO:0042803~protein homodimerization activity,GO:0043176~am…		10549165,10995219,11278996,11386852,11516159,11997338,12161434,12477932,12604405,12615003,14656021,15059614,15060097,15122597,15198953,15489334,15531579,15598699,15797993,16006999,16046727,16049973,16169070,16365025,16447238,16536979,17035141,17074544,17113224,17119116,17206530,17311259,17311260,17420066,17446168,17482557,17595805,17891500,17896178,17904392,18378616,18381459,18427977,18635682,188…
4645	LOC392335,LOC441420,MYO5B,	similar to acetyl-Coenzyme A acyltransferase 2 (mitochondrial 3-oxoacyl-Coenzyme A thiolase); similar to KIAA1119 protein; myosin VB		Microvillus inclusion disease,				GO:0000166~nucleotide binding,GO:0001882~nucleoside binding,GO:0001883~purine nucleoside binding,GO:0003774~motor activity,GO:0003779~actin binding,GO:0005516~calmodulin binding,GO:0005524~ATP binding,GO:0008092~cytoskeletal protein binding,GO:0017076~purine nucleotide binding,GO:0030554~adenyl nucleotide binding,GO:0032553~ribonucleotide binding,GO:0032555~purine ribonucleotide binding,GO:003255…		10574461,11408590,11495908,12477932,14702039,15489334,16214890,16344560,17053785,17462998,18317468,18669648,18724368,19006234,19008234,2236059,7757816,8022818,8884266,
6510	SLC1A5,	solute carrier family 1 (neutral amino acid transporter), member 5			cystic fibrosis,			GO:0005275~amine transmembrane transporter activity,GO:0005310~dicarboxylic acid transmembrane transporter activity,GO:0005343~organic acid:sodium symporter activity,GO:0008509~anion transmembrane transporter activity,GO:0015171~amino acid transmembrane transporter activity,GO:0015175~neutral amino acid transmembrane transporter activity,GO:0015293~symporter activity,GO:0015294~solute:cation symp…		10051606,10196349,11350958,11781704,12050356,12175968,12477932,12555937,12584318,12757936,14520239,14702039,15489334,15845389,15848195,16197915,16344560,16435221,16516348,16820059,17081065,17081983,17329400,17353931,17676482,18157695,18638388,18669648,8702519,
6566	SLC16A1,	solute carrier family 16, member 1 (monocarboxylic acid transporter 1)		Erythrocyte lactate transporter defect,Hyperinsulinemic hypoglycemia, familial, 7,				GO:0008028~monocarboxylic acid transmembrane transporter activity,GO:0015130~mevalonate transmembrane transporter activity,GO:0015293~symporter activity,GO:0015355~secondary active monocarboxylate transmembrane transporter activity,		10471310,10562613,10590411,10921872,11820324,11882670,11944921,11953883,12477932,12479094,12657613,12739169,12759536,12949353,1429658,14702039,14724187,15135232,15489334,15765403,15804185,15901598,16150873,16370372,16403470,16408234,16441976,17016429,17081983,17082373,17182800,17353931,17701893,17974005,18079261,18188595,18539591,18669648,18691976,18832090,19033536,19033663,7835905,8124722,888954…
9194	slc16a7,	solute carrier family 16, member 7 (monocarboxylic acid transporter 2)						GO:0005477~pyruvate secondary active transmembrane transporter activity,GO:0008028~monocarboxylic acid transmembrane transporter activity,GO:0015293~symporter activity,GO:0015355~secondary active monocarboxylate transmembrane transporter activity,GO:0050833~pyruvate transmembrane transporter activity,		12115955,12477932,12739169,14757520,15489334,17502341,18188595,18598673,9786900,
6573	Slc19a1,	solute carrier family 19 (folate transporter), member 1			bladder cancer,breast cancer,cervical cancer,cleft lip with cleft palate cleft lip without cleft palate,colon cancer,colorectal cancer,Crohn's disease; ulcerative colitis,Down syndrome,drug hypersensitivity,esophageal cancer stomach cancer,folate homocysteine,folate, erythrocyte homocysteine thromboembolism, venous,gastrointestinal toxicity leukemia,heart anomalies, congenital,heart anomalies, co…			GO:0005542~folic acid binding,GO:0008517~folic acid transporter activity,GO:0008518~reduced folate carrier activity,GO:0015238~drug transporter activity,GO:0015350~methotrexate transporter activity,GO:0016597~amino acid binding,GO:0019842~vitamin binding,GO:0031406~carboxylic acid binding,GO:0043176~amine binding,GO:0051183~vitamin transporter activity,GO:0051184~cofactor transporter activity,		10347183,10830953,11705857,11857541,12087110,12139489,12144527,12175915,12227830,12228234,12411325,12454742,12477932,12519783,12576457,12673279,12707400,12749765,12753319,12855225,14551190,14584080,14602046,15068242,15214842,15297414,15337749,15457444,15469899,15489334,15564880,15652157,15797993,15922487,15937947,15964598,16115875,16122883,16225938,16365025,16750224,16875718,16917939,16923800,169…
6574	SLC20A1,	solute carrier family 20 (phosphate transporter), member 1			left ventricular function,			GO:0005315~inorganic phosphate transmembrane transporter activity,GO:0005316~high affinity inorganic phosphate:sodium symporter activity,GO:0005436~sodium:phosphate symporter activity,GO:0008509~anion transmembrane transporter activity,GO:0015103~inorganic anion transmembrane transporter activity,GO:0015114~phosphate transmembrane transporter activity,GO:0015293~symporter activity,GO:0015294~solu…		11009570,12097582,12205090,12477932,12761501,1309898,1531369,15489334,15641067,15815621,16527991,1672162,16790504,17339538,17494632,18095154,18669648,18729813,2078500,7929240,7966619,8041748,8411375,9528951,9889306,
6575	SLC20A2,	solute carrier family 20 (phosphate transporter), member 2						GO:0005315~inorganic phosphate transmembrane transporter activity,GO:0005436~sodium:phosphate symporter activity,GO:0008509~anion transmembrane transporter activity,GO:0015103~inorganic anion transmembrane transporter activity,GO:0015114~phosphate transmembrane transporter activity,GO:0015293~symporter activity,GO:0015294~solute:cation symporter activity,GO:0015296~anion:cation symporter activity…		11356966,11435563,11932396,12205090,12477932,14702039,15308749,15489334,15955065,1656098,16790504,17494632,18083107,7745689,8302848,9151850,
788	SLC25A20,	solute carrier family 25 (carnitine/acylcarnitine translocase), member 20		Carnitine-acylcarnitine translocase deficiency,				GO:0015227~acyl carnitine transporter activity,		10384384,10697964,11257506,11592821,12477932,12859414,14702039,15057979,15365988,15489334,15515015,1598097,16054041,17508264,18307102,9399886,9533014,9686371,9733094,9837782,
8604	slc25a12,	solute carrier family 25 (mitochondrial carrier, Aralar), member 12			autism,			GO:0005275~amine transmembrane transporter activity,GO:0005313~L-glutamate transmembrane transporter activity,GO:0005509~calcium ion binding,GO:0015171~amino acid transmembrane transporter activity,GO:0015172~acidic amino acid transmembrane transporter activity,GO:0015179~L-amino acid transmembrane transporter activity,GO:0015183~L-aspartate transmembrane transporter activity,GO:0043167~ion bindi…		10369257,10702666,10965105,11566871,12477932,14702039,15056512,15489334,15494407,15815621,16122696,16205742,16263864,16648338,17151801,17237342,17353931,17497669,17693006,17894412,18180767,18348195,18607376,18996845,19058789,19360665,19401682,9722566,
8034	slc25a16,	solute carrier family 25 (mitochondrial carrier; Graves disease autoantigen), member 16						GO:0015297~antiporter activity,GO:0015300~solute:solute antiporter activity,		11158296,12477932,1457817,14702039,15164054,15489334,2575220,8444471,
291	SLC25A4,	solute carrier family 25 (mitochondrial carrier; adenine nucleotide translocator), member 4		Progressive external ophthalmoplegia with mitochondrial DNA deletions,progressive external ophthalmoplegia with mitochondrial DNA deletions 1,progressive external ophthalmoplegia with mitochondrial DNA deletions, autosomal dominant, 2,	ophthalmoplegia Parkinson's disease,	vpr:Vpr,	hsa04020:Calcium signaling pathway,hsa05012:Parkinson's disease,hsa05016:Huntington's disease,	GO:0005345~purine transmembrane transporter activity,GO:0005471~ATP:ADP antiporter activity,GO:0015205~nucleobase transmembrane transporter activity,GO:0015207~adenine transmembrane transporter activity,GO:0015297~antiporter activity,GO:0015300~solute:solute antiporter activity,GO:0015932~nucleobase, nucleoside, nucleotide and nucleic acid transmembrane transporter activity,	10620603,11175251,11181702,11193032,12750393,12750404,15142377,15638722,15725353,15817944,15832179,16120388,16354571,16429131,16492162,16511342,	10364542,10620603,10926541,11175251,11181702,11193032,11756592,11756613,11809823,12039962,12112115,12140186,12149099,12450408,12477932,12565915,12707443,12750393,12750404,14729611,15033717,15142377,15231833,15489334,15551024,15638722,15725353,15792871,15817944,1582253,16020522,16107323,16120388,16155110,16354571,16429131,16492162,16507998,16556444,16887100,17420318,18083107,18504126,18575922,1885…
292	SLC25A5,SLC25A5P8,	solute carrier family 25 (mitochondrial carrier; adenine nucleotide translocator), member 5; solute carrier family 25 (mitochondrial carrier; adenine nucleotide translocator), member 5 pseudogene 8					hsa04020:Calcium signaling pathway,hsa05012:Parkinson's disease,hsa05016:Huntington's disease,	GO:0005345~purine transmembrane transporter activity,GO:0015205~nucleobase transmembrane transporter activity,GO:0015207~adenine transmembrane transporter activity,GO:0015932~nucleobase, nucleoside, nucleotide and nucleic acid transmembrane transporter activity,		10620603,11287411,11602586,12450408,12477932,12777383,14598172,14743216,15486956,15489334,15772651,16107323,16120388,18063578,18083107,18215124,18267033,2157297,2168878,2829183,3031073,7713517,8918809,9315697,9698557,
293	SLC25A6,	solute carrier family 25 (mitochondrial carrier; adenine nucleotide translocator), member 6					hsa04020:Calcium signaling pathway,hsa05012:Parkinson's disease,hsa05016:Huntington's disease,	GO:0005471~ATP:ADP antiporter activity,GO:0015297~antiporter activity,GO:0015300~solute:solute antiporter activity,		10926541,11756613,11872176,12112115,12450408,12477932,12707443,14726512,14743216,14746803,15033708,15063741,15489334,16120388,16169070,16189514,16201016,16556444,16930576,17220478,17855512,18083107,18691976,19111545,2541251,2547778,2823266,2829183,8486369,8490661,8619474,9110174,
6576	slc25a1,	solute carrier family 25 (mitochondrial carrier; citrate transporter), member 1						GO:0015137~citrate transmembrane transporter activity,GO:0015142~tricarboxylic acid transmembrane transporter activity,		12477932,14702039,15489334,17353931,18706393,19240061,8660975,8666394,8776594,9254007,
60386	SLC25A19,	solute carrier family 25 (mitochondrial thiamine pyrophosphate carrier), member 19		Microcephaly, Amish type,				GO:0015215~nucleotide transmembrane transporter activity,GO:0015932~nucleobase, nucleoside, nucleotide and nucleic acid transmembrane transporter activity,GO:0030233~deoxynucleotide transmembrane transporter activity,		11181995,11226231,11474176,12185364,12477932,14702039,15489334,15539640,16303743,16344560,17035501,18280798,8125298,8889548,9373149,
10165	SLC25A13,	solute carrier family 25, member 13 (citrin)		Citrullinemia, adult-onset type II,Citrullinemia, type II, neonatal-onset,	citrin deficiency,citrullinemia, adult-onset type II,citrullinemia, adult-onset type II; hepatitis, neonatal associated with cholestasis,			GO:0005275~amine transmembrane transporter activity,GO:0005313~L-glutamate transmembrane transporter activity,GO:0005509~calcium ion binding,GO:0015171~amino acid transmembrane transporter activity,GO:0015172~acidic amino acid transmembrane transporter activity,GO:0015179~L-amino acid transmembrane transporter activity,GO:0015183~L-aspartate transmembrane transporter activity,GO:0043167~ion bindi…		10369257,10610724,10642534,11153906,11281457,11343052,11432966,11566871,11793471,12111366,12424587,12477932,12851387,12853948,15489334,16059747,16278034,16344560,16928234,17000460,17092749,17982687,18273444,18392553,18620775,19036621,19232506,19401682,8125298,9373149,
65010	Celsr3,Slc26a6,	solute carrier family 26, member 6; cadherin, EGF LAG seven-pass G-type receptor 3 (flamingo homolog, Drosophila)						GO:0005509~calcium ion binding,GO:0008028~monocarboxylic acid transmembrane transporter activity,GO:0008271~secondary active sulfate transmembrane transporter activity,GO:0008509~anion transmembrane transporter activity,GO:0015103~inorganic anion transmembrane transporter activity,GO:0015116~sulfate transmembrane transporter activity,GO:0015297~antiporter activity,GO:0015300~solute:solute antipor…		10380929,10610771,10716726,10790539,11087667,11181995,11247665,11581495,12217875,12421765,12477932,14702039,15203201,15489334,15548529,15956810,16169070,16344560,16606687,16641997,17081983,17120764,17474147,17881426,18174209,18655181,18951670,19029225,19367581,8889548,9693030,
376497	SLC27A1,	solute carrier family 27 (fatty acid transporter), member 1	6.2.1.-,		lipoprotein; lipids,metabolic syndrome,		hsa03320:PPAR signaling pathway,	GO:0000166~nucleotide binding,		10873384,12235169,12477932,12818409,15057824,15489334,15897321,15978856,18660489,7954810,9671728,
11000	Slc27a3,	solute carrier family 27 (fatty acid transporter), member 3	6.2.1.-,					GO:0000166~nucleotide binding,GO:0004321~fatty-acyl-CoA synthase activity,GO:0016408~C-acyltransferase activity,		12477932,12975309,14702039,15469937,15489334,16710414,9671728,
10999	SLC27A4,	solute carrier family 27 (fatty acid transporter), member 4	6.2.1.-,		insulin resistance,		hsa03320:PPAR signaling pathway,	GO:0000166~nucleotide binding,GO:0005319~lipid transporter activity,GO:0015245~fatty acid transporter activity,		10518211,12477932,14702039,14715877,15164053,15168018,15489334,17353931,17901542,9671728,9878842,
64078	SLC28A3,	solute carrier family 28 (sodium-coupled nucleoside transporter), member 3						GO:0001882~nucleoside binding,GO:0005337~nucleoside transmembrane transporter activity,GO:0005345~purine transmembrane transporter activity,GO:0005350~pyrimidine transmembrane transporter activity,GO:0005415~nucleoside:sodium symporter activity,GO:0015205~nucleobase transmembrane transporter activity,GO:0015293~symporter activity,GO:0015294~solute:cation symporter activity,GO:0015370~solute:sodiu…		11032837,12477932,14504928,14702039,15489334,15738947,15861042,15870078,16271041,16446384,17140564,17409283,17412768,17453413,17696452,17926640,17993510,18199742,18621735,18827020,19074885,19318496,
2030	Slc29a1,	solute carrier family 29 (nucleoside transporters), member 1						GO:0005337~nucleoside transmembrane transporter activity,GO:0015932~nucleobase, nucleoside, nucleotide and nucleic acid transmembrane transporter activity,		10755314,11584005,11814344,12006583,12008078,12097333,12384580,12389626,12477932,12527552,12820662,14574404,14607828,14667819,14702039,14759222,15489334,15529184,15557207,15632314,15649894,15933265,16333246,16344560,16595656,16609362,16688763,16818266,16818276,16858130,16959974,17162590,17409283,17658213,17921321,17926640,18064606,18187485,18462193,18600541,18635603,18669648,18703227,19116148,191…
3177	Slc29a2,	solute carrier family 29 (nucleoside transporters), member 2						GO:0005337~nucleoside transmembrane transporter activity,GO:0015932~nucleobase, nucleoside, nucleotide and nucleic acid transmembrane transporter activity,		12006583,12411296,12477932,12527552,12590919,12820662,12838422,14612157,14702039,15386342,15489334,15644498,15649894,16214850,16924660,17921321,17926640,18635603,18703227,18945750,19105964,7639753,9192854,9396714,9478986,
6520	SLC3A2,	solute carrier family 3 (activators of dibasic and neutral amino acid transport), member 2			melphalan pharmacokinetics melphalan side effects,	env:Envelope surface glycoprotein gp160, precursor,		GO:0005275~amine transmembrane transporter activity,GO:0005432~calcium:sodium antiporter activity,GO:0015171~amino acid transmembrane transporter activity,GO:0015175~neutral amino acid transmembrane transporter activity,GO:0015297~antiporter activity,GO:0015298~solute:cation antiporter activity,GO:0015300~solute:solute antiporter activity,GO:0015368~calcium:cation antiporter activity,GO:0015491~c…	12925876,7561057,8922468,9403839,	10506149,10574970,10631289,10673541,10903140,11311135,11389679,11406111,11435306,11507094,11557028,11564694,11696247,11742812,11749697,11840567,12117417,12181350,12225859,12235164,12270127,12477932,12493773,12531285,12716892,12740424,12754519,12925876,1358795,14527684,14603368,14702039,15146197,15178563,15274339,15458438,15485886,15489334,15556631,15625115,15713750,15769744,15980244,16335952,1634…
81539	SLC38A1,	solute carrier family 38, member 1						GO:0005275~amine transmembrane transporter activity,GO:0005283~sodium:amino acid symporter activity,GO:0005343~organic acid:sodium symporter activity,GO:0005416~cation:amino acid symporter activity,GO:0015171~amino acid transmembrane transporter activity,GO:0015175~neutral amino acid transmembrane transporter activity,GO:0015179~L-amino acid transmembrane transporter activity,GO:0015186~L-glutami…		10891391,11325958,12388062,12477932,14702039,15054072,15489334,16148032,16303743,16344560,16583402,17081983,17549407,18669648,18691976,18703994,8125298,9373149,
54407	slc38a2,	solute carrier family 38, member 2						GO:0005275~amine transmembrane transporter activity,GO:0015171~amino acid transmembrane transporter activity,GO:0015293~symporter activity,GO:0031402~sodium ion binding,GO:0031420~alkali metal ion binding,GO:0043167~ion binding,GO:0043169~cation binding,GO:0046872~metal ion binding,		10718198,10747860,10930503,12054432,12168954,12477932,14623874,14702039,15489334,15561425,15581851,15922329,15951569,16125834,16169070,16344560,16445384,16616430,16621798,16621896,17081983,17237199,18083107,18669648,18697751,18703994,
10991	Slc38a3,	solute carrier family 38, member 3						GO:0005275~amine transmembrane transporter activity,GO:0005290~L-histidine transmembrane transporter activity,GO:0015171~amino acid transmembrane transporter activity,GO:0015174~basic amino acid transmembrane transporter activity,GO:0015175~neutral amino acid transmembrane transporter activity,GO:0015179~L-amino acid transmembrane transporter activity,GO:0015180~L-alanine transmembrane transporte…		10619430,10823827,11076863,11085536,11230166,11256614,12477932,12788082,15094455,15342556,15489334,15489336,16169070,16381901,16432833,16641997,17974005,
55089	Slc38a4,	solute carrier family 38, member 4						GO:0005275~amine transmembrane transporter activity,GO:0015171~amino acid transmembrane transporter activity,GO:0015293~symporter activity,GO:0031402~sodium ion binding,GO:0031420~alkali metal ion binding,GO:0043167~ion binding,GO:0043169~cation binding,GO:0046872~metal ion binding,		11342143,11414754,12477932,12845534,14702039,15489334,16148032,16344560,18703994,19015196,
92745	slc38a5,	solute carrier family 38, member 5						GO:0005275~amine transmembrane transporter activity,GO:0015171~amino acid transmembrane transporter activity,GO:0015175~neutral amino acid transmembrane transporter activity,GO:0015187~glycine transmembrane transporter activity,		11243884,12477932,14702039,15489334,15498874,16344560,17333282,
11254	Slc6a14,	solute carrier family 6 (amino acid transporter), member 14		Obesity, susceptibility to,Obesity, susceptibility to, BMIQ11,Obesity, susceptibility to, X-linked,	obesity,			GO:0005275~amine transmembrane transporter activity,GO:0005326~neurotransmitter transporter activity,GO:0005328~neurotransmitter:sodium symporter activity,GO:0015171~amino acid transmembrane transporter activity,GO:0015293~symporter activity,GO:0015294~solute:cation symporter activity,GO:0015370~solute:sodium symporter activity,		10446133,10999806,12388375,12477932,14660737,14660752,15331564,15489334,15772651,15905073,18029348,18599538,18700007,19058789,
8140	SLC7A5,	solute carrier family 7 (cationic amino acid transporter, y+ system), member 5			melphalan pharmacokinetics melphalan side effects,	env:Envelope surface glycoprotein gp160, precursor,		GO:0003823~antigen binding,GO:0005275~amine transmembrane transporter activity,GO:0015171~amino acid transmembrane transporter activity,GO:0015175~neutral amino acid transmembrane transporter activity,GO:0015179~L-amino acid transmembrane transporter activity,GO:0042277~peptide binding,GO:0042605~peptide antigen binding,	12925876,7561057,8922468,9403839,	10049700,10072483,10391915,10568788,10574970,10629848,11095508,11311135,11389679,11535130,11557028,11564694,11742812,12009310,12117417,12225859,12477932,12824232,12925876,15178563,15200428,15302935,15489334,15589117,15769744,15900591,1597461,16027961,16097034,16175382,16496379,17558306,17622555,18253116,18262359,18294274,18382329,18440724,18781797,18813831,19018776,19121087,19184136,19347882,7561…
9057	SLC7A6,	solute carrier family 7 (cationic amino acid transporter, y+ system), member 6						GO:0005275~amine transmembrane transporter activity,GO:0015171~amino acid transmembrane transporter activity,GO:0015297~antiporter activity,		10903140,11078698,11311135,11742806,12477932,14603368,15280038,15342556,15489334,15756301,16785209,17197568,17329401,17974005,9039502,9829974,9878049,
56301	SLC7A10,	solute carrier family 7, (neutral amino acid transporter, y+ system) member 10						GO:0005275~amine transmembrane transporter activity,GO:0015171~amino acid transmembrane transporter activity,GO:0015175~neutral amino acid transmembrane transporter activity,GO:0015179~L-amino acid transmembrane transporter activity,GO:0015194~L-serine transmembrane transporter activity,GO:0022889~serine transmembrane transporter activity,		10734121,10863037,11441184,11509015,12477932,14702039,15458438,15489334,
6579	SLCO1A2,	solute carrier organic anion transporter family, member 1A2			hypertension,			GO:0008028~monocarboxylic acid transmembrane transporter activity,GO:0008509~anion transmembrane transporter activity,GO:0008514~organic anion transmembrane transporter activity,GO:0015125~bile acid transmembrane transporter activity,		10779507,10873595,11238933,12477932,15489334,15632119,15832500,16344560,16959974,18466105,18695635,19010908,7557095,9007731,9328325,9398014,9539145,
10599	SLCO1B1,	solute carrier organic anion transporter family, member 1B1		SLCO1B1 Variants and Statin-Induced Myopathy--A Genomewide Study,	altered OATP-C transport activity,atorvastatin pharmacokinetics rosuvastatin pharmacokinetics,atrasentan phamacokinetics,bilirubin,cholesterol,cholesterol cholesterol, HDL cholesterol, LDL triglycerides,cholesterol, HDL cholesterol, LDL heart transplant,cholesterol, LDL,cholesterol, LDL pravastatin parmacokinetics,cholesterol; lathosterol,hypertension,irinotecan pharmacokinetics,nateglinide pharm…			GO:0008509~anion transmembrane transporter activity,GO:0008514~organic anion transmembrane transporter activity,GO:0015347~sodium-independent organic anion transmembrane transporter activity,		10358072,10601278,10644574,10779507,10873595,11134001,11477075,11483603,12130747,12196548,12477932,12490595,12670950,12811365,15116054,15226675,15319464,15489334,15519273,15535988,15548849,15864125,15864131,15952872,15961978,16004557,16198652,16198653,16513443,16515396,16534140,16542205,16568260,16678544,16678545,16722833,16758257,16784736,16796707,16847425,16906022,16917677,17047488,17108811,174…
53919	SLCO1C1,	solute carrier organic anion transporter family, member 1C1		Many sequence variants affecting diversity of adult human height,						12351693,12477932,15489334,15652527,15667314,16131319,16344560,16357150,17574004,18391951,18410547,18566113,18687783,18845642,19129463,19179441,19290786,
28231	SLCO4A1,	solute carrier organic anion transporter family, member 4A1						GO:0015349~thyroid hormone transmembrane transporter activity,		10873595,11316767,11780052,12477932,12915686,14702039,15302935,15489334,15994332,18220336,18669648,18691976,19343046,
56848	SPHK2,	sphingosine kinase 2	2.7.1.91,				hsa00600:Sphingolipid metabolism,hsa04020:Calcium signaling pathway,hsa04370:VEGF signaling pathway,hsa04666:Fc gamma R-mediated phagocytosis,	GO:0000166~nucleotide binding,GO:0001727~lipid kinase activity,GO:0001882~nucleoside binding,GO:0001883~purine nucleoside binding,GO:0004143~diacylglycerol kinase activity,GO:0005524~ATP binding,GO:0008481~sphinganine kinase activity,GO:0017016~Ras GTPase binding,GO:0017050~D-erythro-sphingosine kinase activity,GO:0017076~purine nucleotide binding,GO:0019899~enzyme binding,GO:0030554~adenyl nucle…		10751414,11230166,11777919,12391145,12477932,14596938,14702039,15489334,15951439,16103110,17311928,17635916,17895250,18178871,18263879,18691976,19168031,19240026,8786133,
6821	SUOX,	sulfite oxidase	1.8.3.1,	A novel susceptibility locus for type 1 diabetes on Chr12q13 identified by a genome-wide association study,Sulfite oxidase deficiency,	leukemia,		hsa00920:Sulfur metabolism,	GO:0005506~iron ion binding,GO:0008482~sulfite oxidase activity,GO:0009055~electron carrier activity,GO:0016667~oxidoreductase activity, acting on sulfur group of donors,GO:0016670~oxidoreductase activity, acting on sulfur group of donors, oxygen as acceptor,GO:0020037~heme binding,GO:0030151~molybdenum ion binding,GO:0043167~ion binding,GO:0043169~cation binding,GO:0043546~molybdopterin cofactor…		10519592,12112661,12368985,12424234,12477932,12763039,12832761,14567685,14729666,15489334,16140720,16229463,16344560,16475804,17366837,17940249,18177044,18198356,18529001,18959753,7599189,9428520,9600976,
7296	LOC100130902,TXNRD1,	thioredoxin reductase 1; hypothetical LOC100130902	1.8.1.9,		breast cancer,		hsa00240:Pyrimidine metabolism,	GO:0000166~nucleotide binding,GO:0001882~nucleoside binding,GO:0001883~purine nucleoside binding,GO:0004791~thioredoxin-disulfide reductase activity,GO:0008430~selenium binding,GO:0009055~electron carrier activity,GO:0015035~protein disulfide oxidoreductase activity,GO:0015036~disulfide oxidoreductase activity,GO:0016209~antioxidant activity,GO:0016651~oxidoreductase activity, acting on NADH or N…		10383413,10432307,10786696,11375392,11410332,11737861,11782468,11953436,12214272,12435734,12477932,12574159,12668662,12949356,12968334,13679440,14607844,14676218,14980707,15123685,15183196,15199063,15379556,15489334,15592455,15824742,15879598,16424062,16481328,16750198,16868544,16977661,17382897,17512005,17601350,17634480,18042542,18083107,18163424,18187038,18267104,18382651,18483336,18835810,189…
7083	tk1,	thymidine kinase 1, soluble	2.7.1.21,				hsa00240:Pyrimidine metabolism,hsa00983:Drug metabolism,	GO:0000166~nucleotide binding,GO:0001882~nucleoside binding,GO:0001883~purine nucleoside binding,GO:0004797~thymidine kinase activity,GO:0005524~ATP binding,GO:0017076~purine nucleotide binding,GO:0019136~deoxynucleoside kinase activity,GO:0019205~nucleobase, nucleoside, nucleotide kinase activity,GO:0019206~nucleoside kinase activity,GO:0030554~adenyl nucleotide binding,GO:0032553~ribonucleotide…		10924519,11389691,11474248,11992400,12449723,12477932,12699056,1370831,14659972,14697231,14701726,14702039,14719072,15153115,15353126,15489334,15611477,15733844,15809747,15978330,16169070,16964243,16969512,17065087,17227951,17407781,1848304,18615770,18669648,18691976,19087190,19123476,2026611,2263164,2538159,3128713,3301530,3335503,3785218,6549046,8786092,9575153,
7084	tk2,	thymidine kinase 2, mitochondrial	2.7.1.21,	Mitochondrial DNA depletion myopathy,Mitochondrial DNA depletion syndrome, myopathic form,	Mitochondrial myopathy,		hsa00240:Pyrimidine metabolism,hsa00983:Drug metabolism,	GO:0000166~nucleotide binding,GO:0001882~nucleoside binding,GO:0001883~purine nucleoside binding,GO:0004797~thymidine kinase activity,GO:0005524~ATP binding,GO:0017076~purine nucleotide binding,GO:0019136~deoxynucleoside kinase activity,GO:0019205~nucleobase, nucleoside, nucleotide kinase activity,GO:0019206~nucleoside kinase activity,GO:0030554~adenyl nucleotide binding,GO:0032553~ribonucleotide…		11687801,12391347,12477932,12493767,12682338,12687391,12873860,14659972,15639197,15907288,1597187,16344560,16969512,17065084,17468435,17913703,18021809,18265975,18446447,18508266,19154348,19265691,605384,9079672,9598140,9989599,
284273	ZADH2,	zinc binding alcohol dehydrogenase domain containing 2	1.-.-.-,					GO:0008270~zinc ion binding,GO:0043167~ion binding,GO:0043169~cation binding,GO:0046872~metal ion binding,GO:0046914~transition metal ion binding,		12477932,15489334,

## Sheet: HIV_INTERACTION
ID	OFFICIAL_GENE_SYMBOL	HIV_INTERACTION
122481	SLC25A4,	vpr:Vpr,
10632	ABCC1,	tat:Tat,
30	Cpt1a,	env:Envelope surface glycoprotein gp160, precursor,
100	cpt2,	env:Envelope surface glycoprotein gp160, precursor,
132	CHKB,Cpt1b,	env:Envelope surface glycoprotein gp160, precursor,
203	SLC3A2,	env:Envelope surface glycoprotein gp160, precursor,
204	SLC7A5,	env:Envelope surface glycoprotein gp160, precursor,
29922	Cpt1c,	env:Envelope surface glycoprotein gp160, precursor,
4907	Pla2g2a,	env:Envelope surface glycoprotein gp120,
522	ada,	env:Envelope surface glycoprotein gp120,
55902	GPI,	env:Envelope surface glycoprotein gp120,
137872	pla2g6,	env:Envelope surface glycoprotein gp120,
