# Supplementary material for: Genome-wide metabolic model to improve understanding of CD4+ T cell metabolism, immunometabolism and application in drug design
Source: Royal Society of Chemistry journal article supplement (doi:10.1039/c5mb00480b), 2015-11-18
Supplement: c5mb00480b1.zip [file supplementary_Table_5-immunometabolic_genes.xlsx]

## Sheet: effective immunometabolic genes
ID	OFFICIAL_GENE_SYMBOL	Gene Name	EC_NUMBER	ENSEMBL_GENE_ID	GOTERM_MF_FAT	KEGG_PATHWAY
4907	NT5E,	5'-nucleotidase, ecto (CD73)	3.1.3.5,	ENSG00000135318,	GO:0000166~nucleotide binding,GO:0005506~iron ion binding,GO:0008198~ferrous iron binding,GO:0008252~nucleotidase activity,GO:0008253~5'-nucleotidase activity,GO:0008270~zinc ion binding,GO:0016791~phosphatase activity,GO:0043167~ion binding,GO:0043169~cation binding,GO:0046872~metal ion binding,GO:0046914~transition metal ion binding,	hsa00230:Purine metabolism,hsa00240:Pyrimidine metabolism,hsa00760:Nicotinate and nicotinamide metabolism,
506	ATP5B,	ATP synthase, H+ transporting, mitochondrial F1 complex, beta polypeptide	3.6.3.14,	ENSG00000110955,	GO:0000166~nucleotide binding,GO:0001882~nucleoside binding,GO:0001883~purine nucleoside binding,GO:0005509~calcium ion binding,GO:0005524~ATP binding,GO:0008034~lipoprotein binding,GO:0008553~hydrogen-exporting ATPase activity, phosphorylative mechanism,GO:0015077~monovalent inorganic cation transmembrane transporter activity,GO:0015078~hydrogen ion transmembrane transporter activity,GO:0015399~…	hsa00190:Oxidative phosphorylation,hsa05010:Alzheimer's disease,hsa05012:Parkinson's disease,hsa05016:Huntington's disease,
952	cd38,	CD38 molecule	3.2.2.5,	ENSG00000004468,	GO:0003953~NAD+ nucleosidase activity,GO:0016799~hydrolase activity, hydrolyzing N-glycosyl compounds,GO:0016849~phosphorus-oxygen lyase activity,	hsa00760:Nicotinate and nicotinamide metabolism,hsa04020:Calcium signaling pathway,hsa04640:Hematopoietic cell lineage,
2762	Gmds,	GDP-mannose 4,6-dehydratase	4.2.1.47,	ENSG00000112699,	GO:0008446~GDP-mannose 4,6-dehydratase activity,GO:0016836~hydro-lyase activity,GO:0048037~cofactor binding,GO:0050662~coenzyme binding,	hsa00051:Fructose and mannose metabolism,hsa00520:Amino sugar and nucleotide sugar metabolism,
2643	GCH1,	GTP cyclohydrolase 1	3.5.4.16,	ENSG00000131979,	GO:0000166~nucleotide binding,GO:0003933~GTP cyclohydrolase activity,GO:0003934~GTP cyclohydrolase I activity,GO:0005509~calcium ion binding,GO:0005525~GTP binding,GO:0008270~zinc ion binding,GO:0016814~hydrolase activity, acting on carbon-nitrogen (but not peptide) bonds, in cyclic amidines,GO:0017076~purine nucleotide binding,GO:0019001~guanyl nucleotide binding,GO:0030742~GTP-dependent protein…	hsa00790:Folate biosynthesis,
54187	NANS,	N-acetylneuraminic acid synthase	2.5.1.56,2.5.1.57,	ENSG00000095380,	GO:0008781~N-acylneuraminate cytidylyltransferase activity,GO:0016765~transferase activity, transferring alkyl or aryl (other than methyl) groups,GO:0016779~nucleotidyltransferase activity,GO:0047444~N-acylneuraminate-9-phosphate synthase activity,GO:0050462~N-acetylneuraminate synthase activity,GO:0070567~cytidylyltransferase activity,	hsa00520:Amino sugar and nucleotide sugar metabolism,
4905	Nsf,	N-ethylmaleimide-sensitive factor	3.6.4.6,	ENSG00000073969,	GO:0000149~SNARE binding,GO:0000166~nucleotide binding,GO:0000287~magnesium ion binding,GO:0001882~nucleoside binding,GO:0001883~purine nucleoside binding,GO:0004175~endopeptidase activity,GO:0004176~ATP-dependent peptidase activity,GO:0004252~serine-type endopeptidase activity,GO:0005524~ATP binding,GO:0008022~protein C-terminus binding,GO:0008233~peptidase activity,GO:0008236~serine-type peptid…
51079	Ndufa13,	NADH dehydrogenase (ubiquinone) 1 alpha subcomplex, 13		ENSG00000130288,	GO:0000166~nucleotide binding,GO:0001882~nucleoside binding,GO:0001883~purine nucleoside binding,GO:0003954~NADH dehydrogenase activity,GO:0005524~ATP binding,GO:0008137~NADH dehydrogenase (ubiquinone) activity,GO:0016651~oxidoreductase activity, acting on NADH or NADPH,GO:0016655~oxidoreductase activity, acting on NADH or NADPH, quinone or similar compound as acceptor,GO:0017076~purine nucleotid…
4719	NDUFS1,	NADH dehydrogenase (ubiquinone) Fe-S protein 1, 75kDa (NADH-coenzyme Q reductase)	1.6.5.3,1.6.99.3,	ENSG00000023228,	GO:0003954~NADH dehydrogenase activity,GO:0005506~iron ion binding,GO:0008137~NADH dehydrogenase (ubiquinone) activity,GO:0009055~electron carrier activity,GO:0016651~oxidoreductase activity, acting on NADH or NADPH,GO:0016655~oxidoreductase activity, acting on NADH or NADPH, quinone or similar compound as acceptor,GO:0043167~ion binding,GO:0043169~cation binding,GO:0046872~metal ion binding,GO:0…	hsa00190:Oxidative phosphorylation,hsa05010:Alzheimer's disease,hsa05012:Parkinson's disease,hsa05016:Huntington's disease,
4722	ndufs3,	NADH dehydrogenase (ubiquinone) Fe-S protein 3, 30kDa (NADH-coenzyme Q reductase)	1.6.5.3,1.6.99.3,	ENSG00000213619,	GO:0003954~NADH dehydrogenase activity,GO:0008137~NADH dehydrogenase (ubiquinone) activity,GO:0009055~electron carrier activity,GO:0016651~oxidoreductase activity, acting on NADH or NADPH,GO:0016655~oxidoreductase activity, acting on NADH or NADPH, quinone or similar compound as acceptor,GO:0050136~NADH dehydrogenase (quinone) activity,	hsa00190:Oxidative phosphorylation,hsa05010:Alzheimer's disease,hsa05012:Parkinson's disease,hsa05016:Huntington's disease,
65985	AACS,	acetoacetyl-CoA synthetase	6.2.1.16,	ENSG00000081760,	GO:0000166~nucleotide binding,GO:0001882~nucleoside binding,GO:0001883~purine nucleoside binding,GO:0005524~ATP binding,GO:0016877~ligase activity, forming carbon-sulfur bonds,GO:0016878~acid-thiol ligase activity,GO:0017076~purine nucleotide binding,GO:0030554~adenyl nucleotide binding,GO:0030729~acetoacetate-CoA ligase activity,GO:0032553~ribonucleotide binding,GO:0032555~purine ribonucleotide …	hsa00650:Butanoate metabolism,
57379	AICDA,	activation-induced cytidine deaminase	3.5.4.5,	ENSG00000111732,	GO:0004126~cytidine deaminase activity,GO:0008270~zinc ion binding,GO:0016814~hydrolase activity, acting on carbon-nitrogen (but not peptide) bonds, in cyclic amidines,GO:0019239~deaminase activity,GO:0043167~ion binding,GO:0043169~cation binding,GO:0046872~metal ion binding,GO:0046914~transition metal ion binding,	hsa04672:Intestinal immune network for IgA production,hsa05340:Primary immunodeficiency,
51	ACOX1,	acyl-Coenzyme A oxidase 1, palmitoyl	1.3.3.6,	ENSG00000161533,	GO:0000166~nucleotide binding,GO:0001882~nucleoside binding,GO:0001883~purine nucleoside binding,GO:0003995~acyl-CoA dehydrogenase activity,GO:0003997~acyl-CoA oxidase activity,GO:0009055~electron carrier activity,GO:0016634~oxidoreductase activity, acting on the CH-CH group of donors, oxygen as acceptor,GO:0017076~purine nucleotide binding,GO:0030554~adenyl nucleotide binding,GO:0047485~protein …	hsa00071:Fatty acid metabolism,hsa00592:alpha-Linolenic acid metabolism,hsa01040:Biosynthesis of unsaturated fatty acids,hsa03320:PPAR signaling pathway,
100	ada,	adenosine deaminase	3.5.4.4,	ENSG00000196839,	GO:0001882~nucleoside binding,GO:0001883~purine nucleoside binding,GO:0004000~adenosine deaminase activity,GO:0008270~zinc ion binding,GO:0016814~hydrolase activity, acting on carbon-nitrogen (but not peptide) bonds, in cyclic amidines,GO:0019239~deaminase activity,GO:0043167~ion binding,GO:0043169~cation binding,GO:0046872~metal ion binding,GO:0046914~transition metal ion binding,	hsa00230:Purine metabolism,hsa05340:Primary immunodeficiency,
128	ADH5,ADH5P4,	alcohol dehydrogenase 5 (class III), chi polypeptide, pseudogene 4; alcohol dehydrogenase 5 (class III), chi polypeptide	1.1.1.-,1.1.1.1,1.1.1.284,	ENSG00000197894,	GO:0000166~nucleotide binding,GO:0004022~alcohol dehydrogenase (NAD) activity,GO:0005504~fatty acid binding,GO:0008270~zinc ion binding,GO:0008289~lipid binding,GO:0009055~electron carrier activity,GO:0016620~oxidoreductase activity, acting on the aldehyde or oxo group of donors, NAD or NADP as acceptor,GO:0018467~formaldehyde dehydrogenase activity,GO:0031406~carboxylic acid binding,GO:0033293~m…	hsa00010:Glycolysis / Gluconeogenesis,hsa00071:Fatty acid metabolism,hsa00350:Tyrosine metabolism,hsa00680:Methane metabolism,hsa00830:Retinol metabolism,hsa00980:Metabolism of xenobiotics by cytochrome P450,hsa00982:Drug metabolism,
229	Aldob,	aldolase B, fructose-bisphosphate	4.1.2.13,	ENSG00000136872,	GO:0004332~fructose-bisphosphate aldolase activity,GO:0005529~sugar binding,GO:0008092~cytoskeletal protein binding,GO:0016832~aldehyde-lyase activity,GO:0019899~enzyme binding,GO:0030246~carbohydrate binding,GO:0042802~identical protein binding,GO:0048029~monosaccharide binding,GO:0051117~ATPase binding,GO:0070061~fructose binding,	hsa00010:Glycolysis / Gluconeogenesis,hsa00030:Pentose phosphate pathway,hsa00051:Fructose and mannose metabolism,
383	arg1,	arginase, liver	3.5.3.1,	ENSG00000118520,	GO:0004053~arginase activity,GO:0016813~hydrolase activity, acting on carbon-nitrogen (but not peptide) bonds, in linear amidines,GO:0030145~manganese ion binding,GO:0043167~ion binding,GO:0043169~cation binding,GO:0046872~metal ion binding,GO:0046914~transition metal ion binding,	hsa00330:Arginine and proline metabolism,
56052	ALG1,	asparagine-linked glycosylation 1, beta-1,4-mannosyltransferase homolog (S. cerevisiae)	2.4.1.142,	ENSG00000033011,	GO:0000030~mannosyltransferase activity,GO:0004578~chitobiosyldiphosphodolichol beta-mannosyltransferase activity,GO:0019187~beta-1,4-mannosyltransferase activity,	hsa00510:N-Glycan biosynthesis,
873	Cbr1,	carbonyl reductase 1	1.1.1.184,1.1.1.189,1.1.1.197,	ENSG00000159228,	GO:0004090~carbonyl reductase (NADPH) activity,GO:0047021~15-hydroxyprostaglandin dehydrogenase (NADP+) activity,GO:0050221~prostaglandin-E2 9-reductase activity,	hsa00590:Arachidonic acid metabolism,
847	cat,	catalase	1.11.1.6,	ENSG00000121691,	GO:0000166~nucleotide binding,GO:0004046~aminoacylase activity,GO:0004096~catalase activity,GO:0004601~peroxidase activity,GO:0005506~iron ion binding,GO:0016209~antioxidant activity,GO:0016684~oxidoreductase activity, acting on peroxide as acceptor,GO:0016811~hydrolase activity, acting on carbon-nitrogen (but not peptide) bonds, in linear amides,GO:0020037~heme binding,GO:0042802~identical prote…	hsa00380:Tryptophan metabolism,hsa00680:Methane metabolism,hsa05014:Amyotrophic lateral sclerosis (ALS),
5476	CTSA,	cathepsin A	3.4.16.5,	ENSG00000064601,	GO:0004180~carboxypeptidase activity,GO:0004185~serine-type carboxypeptidase activity,GO:0008047~enzyme activator activity,GO:0008233~peptidase activity,GO:0008236~serine-type peptidase activity,GO:0008238~exopeptidase activity,GO:0017171~serine hydrolase activity,GO:0070008~serine-type exopeptidase activity,GO:0070011~peptidase activity, acting on L-amino acid peptides,	hsa04142:Lysosome,hsa04614:Renin-angiotensin system,
55907	CMAS,	cytidine monophosphate N-acetylneuraminic acid synthetase	2.7.7.43,	ENSG00000111726,	GO:0008781~N-acylneuraminate cytidylyltransferase activity,GO:0016779~nucleotidyltransferase activity,GO:0070567~cytidylyltransferase activity,	hsa00520:Amino sugar and nucleotide sugar metabolism,
1603	DAD1,	defender against cell death 1	2.4.1.119,	ENSG00000129562,	GO:0004576~oligosaccharyl transferase activity,GO:0004579~dolichyl-diphosphooligosaccharide-protein glycotransferase activity,	hsa00510:N-Glycan biosynthesis,
1723	dhodh,	dihydroorotate dehydrogenase	1.3.3.1,	ENSG00000102967,	GO:0004152~dihydroorotate dehydrogenase activity,GO:0004158~dihydroorotate oxidase activity,GO:0016634~oxidoreductase activity, acting on the CH-CH group of donors, oxygen as acceptor,	hsa00240:Pyrimidine metabolism,
1650	DDOST,	dolichyl-diphosphooligosaccharide-protein glycosyltransferase	2.4.1.119,	ENSG00000117242,	GO:0004576~oligosaccharyl transferase activity,GO:0004579~dolichyl-diphosphooligosaccharide-protein glycotransferase activity,	hsa00510:N-Glycan biosynthesis,
10020	gne,	glucosamine (UDP-N-acetyl)-2-epimerase/N-acetylmannosamine kinase	2.7.1.60,5.1.3.14,	ENSG00000159921,	GO:0000166~nucleotide binding,GO:0001882~nucleoside binding,GO:0001883~purine nucleoside binding,GO:0005524~ATP binding,GO:0008761~UDP-N-acetylglucosamine 2-epimerase activity,GO:0009384~N-acylmannosamine kinase activity,GO:0016854~racemase and epimerase activity,GO:0016857~racemase and epimerase activity, acting on carbohydrates and derivatives,GO:0017076~purine nucleotide binding,GO:0019200~car…	hsa00520:Amino sugar and nucleotide sugar metabolism,
2821	GPI,	glucose phosphate isomerase	5.3.1.9,	ENSG00000105220,	GO:0004347~glucose-6-phosphate isomerase activity,GO:0005125~cytokine activity,GO:0008083~growth factor activity,GO:0016860~intramolecular oxidoreductase activity,GO:0016861~intramolecular oxidoreductase activity, interconverting aldoses and ketoses,	hsa00010:Glycolysis / Gluconeogenesis,hsa00030:Pentose phosphate pathway,hsa00500:Starch and sucrose metabolism,hsa00520:Amino sugar and nucleotide sugar metabolism,
2539	G6PD,	glucose-6-phosphate dehydrogenase	1.1.1.49,	ENSG00000160211,	GO:0000166~nucleotide binding,GO:0004345~glucose-6-phosphate dehydrogenase activity,GO:0005529~sugar binding,GO:0005536~glucose binding,GO:0030246~carbohydrate binding,GO:0042802~identical protein binding,GO:0042803~protein homodimerization activity,GO:0046983~protein dimerization activity,GO:0048029~monosaccharide binding,GO:0048037~cofactor binding,GO:0050661~NADP or NADPH binding,GO:0050662~co…	hsa00030:Pentose phosphate pathway,hsa00480:Glutathione metabolism,
2729	GCLC,	glutamate-cysteine ligase, catalytic subunit	6.3.2.2,	ENSG00000001084,	GO:0000166~nucleotide binding,GO:0000287~magnesium ion binding,GO:0001882~nucleoside binding,GO:0001883~purine nucleoside binding,GO:0004357~glutamate-cysteine ligase activity,GO:0005524~ATP binding,GO:0016595~glutamate binding,GO:0016597~amino acid binding,GO:0016879~ligase activity, forming carbon-nitrogen bonds,GO:0016881~acid-amino acid ligase activity,GO:0017076~purine nucleotide binding,GO:…	hsa00480:Glutathione metabolism,
2730	GCLM,	glutamate-cysteine ligase, modifier subunit	6.3.2.2,	ENSG00000023909,	GO:0004357~glutamate-cysteine ligase activity,GO:0016879~ligase activity, forming carbon-nitrogen bonds,GO:0016881~acid-amino acid ligase activity,GO:0019899~enzyme binding,GO:0035226~glutamate-cysteine ligase catalytic subunit binding,GO:0046982~protein heterodimerization activity,GO:0046983~protein dimerization activity,	hsa00480:Glutathione metabolism,
2937	gss,	glutathione synthetase	6.3.2.3,	ENSG00000100983,	GO:0000166~nucleotide binding,GO:0001882~nucleoside binding,GO:0001883~purine nucleoside binding,GO:0004363~glutathione synthase activity,GO:0005524~ATP binding,GO:0016594~glycine binding,GO:0016597~amino acid binding,GO:0016879~ligase activity, forming carbon-nitrogen bonds,GO:0016881~acid-amino acid ligase activity,GO:0017076~purine nucleotide binding,GO:0030554~adenyl nucleotide binding,GO:003…	hsa00480:Glutathione metabolism,
57678	GPAM,	glycerol-3-phosphate acyltransferase, mitochondrial	2.3.1.15,	ENSG00000119927,	GO:0004366~glycerol-3-phosphate O-acyltransferase activity,GO:0008374~O-acyltransferase activity,	hsa00561:Glycerolipid metabolism,hsa00564:Glycerophospholipid metabolism,
2739	GLO1,	glyoxalase I	4.4.1.5,	ENSG00000124767,	GO:0004462~lactoylglutathione lyase activity,GO:0008270~zinc ion binding,GO:0016846~carbon-sulfur lyase activity,GO:0043167~ion binding,GO:0043169~cation binding,GO:0046872~metal ion binding,GO:0046914~transition metal ion binding,	hsa00620:Pyruvate metabolism,
3251	HPRT1,	hypoxanthine phosphoribosyltransferase 1	2.4.2.8,	ENSG00000165704,	GO:0000287~magnesium ion binding,GO:0002054~nucleobase binding,GO:0002060~purine binding,GO:0004422~hypoxanthine phosphoribosyltransferase activity,GO:0016763~transferase activity, transferring pentosyl groups,GO:0042802~identical protein binding,GO:0042803~protein homodimerization activity,GO:0043167~ion binding,GO:0043169~cation binding,GO:0046872~metal ion binding,GO:0046983~protein dimerizati…	hsa00230:Purine metabolism,hsa00983:Drug metabolism,
4353	MPO,	myeloperoxidase	1.11.1.7,	ENSG00000005381,	GO:0003682~chromatin binding,GO:0004601~peroxidase activity,GO:0005506~iron ion binding,GO:0005509~calcium ion binding,GO:0016209~antioxidant activity,GO:0016684~oxidoreductase activity, acting on peroxide as acceptor,GO:0020037~heme binding,GO:0043167~ion binding,GO:0043169~cation binding,GO:0046872~metal ion binding,GO:0046906~tetrapyrrole binding,GO:0046914~transition metal ion binding,
4860	pnp,	nucleoside phosphorylase	2.4.2.1,	ENSG00000198805,	GO:0001882~nucleoside binding,GO:0002054~nucleobase binding,GO:0002060~purine binding,GO:0004731~purine-nucleoside phosphorylase activity,GO:0008144~drug binding,GO:0016763~transferase activity, transferring pentosyl groups,GO:0042301~phosphate binding,GO:0043167~ion binding,GO:0043168~anion binding,	hsa00230:Purine metabolism,hsa00240:Pyrimidine metabolism,hsa00760:Nicotinate and nicotinamide metabolism,
5728	pten,PTENP1,	phosphatase and tensin homolog; phosphatase and tensin homolog pseudogene 1	3.1.3.16,3.1.3.48,3.1.3.67,	ENSG00000171862,	GO:0000287~magnesium ion binding,GO:0004437~inositol or phosphatidylinositol phosphatase activity,GO:0004438~phosphatidylinositol-3-phosphatase activity,GO:0004721~phosphoprotein phosphatase activity,GO:0004722~protein serine/threonine phosphatase activity,GO:0004725~protein tyrosine phosphatase activity,GO:0005161~platelet-derived growth factor receptor binding,GO:0008138~protein tyrosine/serine…	hsa00562:Inositol phosphate metabolism,hsa04070:Phosphatidylinositol signaling system,hsa04115:p53 signaling pathway,hsa04510:Focal adhesion,hsa04530:Tight junction,hsa05200:Pathways in cancer,hsa05213:Endometrial cancer,hsa05214:Glioma,hsa05215:Prostate cancer,hsa05218:Melanoma,hsa05222:Small cell lung cancer,
5152	PDE9A,	phosphodiesterase 9A	3.1.4.35,	ENSG00000160191,	GO:0004112~cyclic-nucleotide phosphodiesterase activity,GO:0004114~3',5'-cyclic-nucleotide phosphodiesterase activity,GO:0008081~phosphoric diester hydrolase activity,GO:0030145~manganese ion binding,GO:0043167~ion binding,GO:0043169~cation binding,GO:0046872~metal ion binding,GO:0046914~transition metal ion binding,GO:0047555~3',5'-cyclic-GMP phosphodiesterase activity,	hsa00230:Purine metabolism,
5338	PLD2,	phospholipase D2	3.1.4.4,	ENSG00000129219,	GO:0004620~phospholipase activity,GO:0004630~phospholipase D activity,GO:0005543~phospholipid binding,GO:0008081~phosphoric diester hydrolase activity,GO:0008289~lipid binding,GO:0016298~lipase activity,GO:0035091~phosphoinositide binding,GO:0070290~NAPE-specific phospholipase D activity,	hsa00564:Glycerophospholipid metabolism,hsa00565:Ether lipid metabolism,hsa04144:Endocytosis,hsa04666:Fc gamma R-mediated phagocytosis,hsa04912:GnRH signaling pathway,
4758	Neu1,	sialidase 1 (lysosomal sialidase)	3.2.1.18,	ENSG00000184494,ENSG00000204386,ENSG00000206270,	GO:0004308~exo-alpha-sialidase activity,GO:0016997~alpha-sialidase activity,	hsa00511:Other glycan degradation,hsa00600:Sphingolipid metabolism,hsa04142:Lysosome,
5315	LOC652797,PKM2,	similar to Pyruvate kinase, isozymes M1/M2 (Pyruvate kinase muscle isozyme) (Cytosolic thyroid hormone-binding protein) (CTHBP) (THBP1); pyruvate kinase, muscle	2.7.1.40,	ENSG00000067225,	GO:0000166~nucleotide binding,GO:0000287~magnesium ion binding,GO:0001882~nucleoside binding,GO:0001883~purine nucleoside binding,GO:0004743~pyruvate kinase activity,GO:0005524~ATP binding,GO:0017076~purine nucleotide binding,GO:0030554~adenyl nucleotide binding,GO:0030955~potassium ion binding,GO:0031420~alkali metal ion binding,GO:0032553~ribonucleotide binding,GO:0032555~purine ribonucleotide …	hsa00010:Glycolysis / Gluconeogenesis,hsa00230:Purine metabolism,hsa00620:Pyruvate metabolism,hsa04930:Type II diabetes mellitus,
6566	SLC16A1,	solute carrier family 16, member 1 (monocarboxylic acid transporter 1)		ENSG00000155380,	GO:0008028~monocarboxylic acid transmembrane transporter activity,GO:0015130~mevalonate transmembrane transporter activity,GO:0015293~symporter activity,GO:0015355~secondary active monocarboxylate transmembrane transporter activity,
6520	SLC3A2,	solute carrier family 3 (activators of dibasic and neutral amino acid transport), member 2		ENSG00000168003,	GO:0005275~amine transmembrane transporter activity,GO:0005432~calcium:sodium antiporter activity,GO:0015171~amino acid transmembrane transporter activity,GO:0015175~neutral amino acid transmembrane transporter activity,GO:0015297~antiporter activity,GO:0015298~solute:cation antiporter activity,GO:0015300~solute:solute antiporter activity,GO:0015368~calcium:cation antiporter activity,GO:0015491~c…
8140	SLC7A5,	solute carrier family 7 (cationic amino acid transporter, y+ system), member 5		ENSG00000103257,	GO:0003823~antigen binding,GO:0005275~amine transmembrane transporter activity,GO:0015171~amino acid transmembrane transporter activity,GO:0015175~neutral amino acid transmembrane transporter activity,GO:0015179~L-amino acid transmembrane transporter activity,GO:0042277~peptide binding,GO:0042605~peptide antigen binding,
9057	SLC7A6,	solute carrier family 7 (cationic amino acid transporter, y+ system), member 6		ENSG00000103064,	GO:0005275~amine transmembrane transporter activity,GO:0015171~amino acid transmembrane transporter activity,GO:0015297~antiporter activity,
56301	SLC7A10,	solute carrier family 7, (neutral amino acid transporter, y+ system) member 10		ENSG00000130876,	GO:0005275~amine transmembrane transporter activity,GO:0015171~amino acid transmembrane transporter activity,GO:0015175~neutral amino acid transmembrane transporter activity,GO:0015179~L-amino acid transmembrane transporter activity,GO:0015194~L-serine transmembrane transporter activity,GO:0022889~serine transmembrane transporter activity,
6578	SLCO2A1,	solute carrier organic anion transporter family, member 2A1		ENSG00000174640,	GO:0005319~lipid transporter activity,GO:0008028~monocarboxylic acid transmembrane transporter activity,GO:0015132~prostaglandin transmembrane transporter activity,GO:0015245~fatty acid transporter activity,
259230	sgms1,	sphingomyelin synthase 1	2.7.8.27,	ENSG00000198964,	GO:0016780~phosphotransferase activity, for other substituted phosphate groups,GO:0033188~sphingomyelin synthase activity,GO:0047493~ceramide cholinephosphotransferase activity,	hsa00600:Sphingolipid metabolism,
56848	SPHK2,	sphingosine kinase 2	2.7.1.91,	ENSG00000063176,	GO:0000166~nucleotide binding,GO:0001727~lipid kinase activity,GO:0001882~nucleoside binding,GO:0001883~purine nucleoside binding,GO:0004143~diacylglycerol kinase activity,GO:0005524~ATP binding,GO:0008481~sphinganine kinase activity,GO:0017016~Ras GTPase binding,GO:0017050~D-erythro-sphingosine kinase activity,GO:0017076~purine nucleotide binding,GO:0019899~enzyme binding,GO:0030554~adenyl nucle…	hsa00600:Sphingolipid metabolism,hsa04020:Calcium signaling pathway,hsa04370:VEGF signaling pathway,hsa04666:Fc gamma R-mediated phagocytosis,
8879	sgpl1,	sphingosine-1-phosphate lyase 1	4.1.2.27,	ENSG00000166224,	GO:0008117~sphinganine-1-phosphate aldolase activity,GO:0016831~carboxy-lyase activity,GO:0016832~aldehyde-lyase activity,GO:0019842~vitamin binding,GO:0030170~pyridoxal phosphate binding,GO:0048037~cofactor binding,GO:0070279~vitamin B6 binding,	hsa00600:Sphingolipid metabolism,
81537	Sgpp1,	sphingosine-1-phosphate phosphatase 1	3.1.3.-,	ENSG00000126821,	GO:0016791~phosphatase activity,GO:0042392~sphingosine-1-phosphate phosphatase activity,	hsa00600:Sphingolipid metabolism,
6647	SOD1,	superoxide dismutase 1, soluble	1.15.1.1,	ENSG00000142168,	GO:0004784~superoxide dismutase activity,GO:0005507~copper ion binding,GO:0008270~zinc ion binding,GO:0016209~antioxidant activity,GO:0016721~oxidoreductase activity, acting on superoxide radicals as acceptor,GO:0019899~enzyme binding,GO:0019902~phosphatase binding,GO:0019903~protein phosphatase binding,GO:0030346~protein phosphatase 2B binding,GO:0042802~identical protein binding,GO:0042803~prot…	hsa05014:Amyotrophic lateral sclerosis (ALS),hsa05016:Huntington's disease,hsa05020:Prion diseases,
6648	Sod2,	superoxide dismutase 2, mitochondrial	1.15.1.1,	ENSG00000112096,	GO:0004784~superoxide dismutase activity,GO:0016209~antioxidant activity,GO:0016721~oxidoreductase activity, acting on superoxide radicals as acceptor,GO:0019825~oxygen binding,GO:0030145~manganese ion binding,GO:0043167~ion binding,GO:0043169~cation binding,GO:0046872~metal ion binding,GO:0046914~transition metal ion binding,	hsa05016:Huntington's disease,
1890	Tymp,	thymidine phosphorylase	2.4.2.4,	ENSG00000025708,	GO:0005161~platelet-derived growth factor receptor binding,GO:0008083~growth factor activity,GO:0009032~thymidine phosphorylase activity,GO:0016763~transferase activity, transferring pentosyl groups,	hsa00240:Pyrimidine metabolism,hsa00983:Drug metabolism,hsa05219:Bladder cancer,
7298	Tyms,	thymidylate synthetase	2.1.1.45,	ENSG00000176890,	GO:0000166~nucleotide binding,GO:0004799~thymidylate synthase activity,GO:0042083~5,10-methylenetetrahydrofolate-dependent methyltransferase activity,GO:0048037~cofactor binding,	hsa00240:Pyrimidine metabolism,hsa00670:One carbon pool by folate,
7264	TSTA3,	tissue specific transplantation antigen P35B	1.1.1.271,	ENSG00000104522,	GO:0009055~electron carrier activity,GO:0042356~GDP-4-dehydro-D-rhamnose reductase activity,GO:0048037~cofactor binding,GO:0050577~GDP-L-fucose synthase activity,GO:0050662~coenzyme binding,	hsa00051:Fructose and mannose metabolism,hsa00520:Amino sugar and nucleotide sugar metabolism,
