# Supplementary material for: Genome-wide metabolic model to improve understanding of CD4+ T cell metabolism, immunometabolism and application in drug design
Source: Royal Society of Chemistry journal article supplement (doi:10.1039/c5mb00480b), 2015-11-18
Supplement: c5mb00480b1.zip [file supplementary_Table_6-pten_analysis.xlsx]

## Sheet: up
Rxn name	foldchange(log2)	Subsystem	Formula	Genes	Rxn description
r0364	1.69472	Aminosugar metabolism	datp[c] + gam[c] -> h[c] + gam6p[c] + dadp[c]		Glycolysis / Glyconeogenesis EC:2.7.1.1
P5CRxm	1.02624	Arginine and Proline Metabolism	2 h[m] + nadh[m] + 1pyr5c[m] -> nad[m] + pro_L[m]	5831.1 5831.2	pyrroline-5-carboxylate reductase (m)
BTNDe	1.03413	Biotin metabolism	h2o[e] + biocyt[e] -> lys_L[e] + btn[e]	686.1	biotinidase (biotin), extracellular
ITCOAL1m	1.31745	C5-branched dibasic acid metabolism	coa[m] + gtp[m] + itacon[m] <=> pi[m] + gdp[m] + itaccoa[m]	8801.1 8802.1	Itaconate--CoA ligase (GDP-forming), mitochondrial
ITCOALm	1.31745	C5-branched dibasic acid metabolism	coa[m] + atp[m] + itacon[m] <=> h[m] + adp[m] + pi[m] + itaccoa[m]	8802.1 8803.1	Itaconate--CoA ligase (ADP-forming), mitochondrial
C14STRr	1.68821	Cholesterol metabolism	h[r] + 44mctr[r] + nadph[r] -> 44mzym[r] + nadp[r]	7108.1	C-14 sterol reductase
r0780	1.68821	Cholesterol metabolism	44mzym[r] + nadp[r] <=> h[r] + 44mctr[r] + nadph[r]	10449.1 30.1 3032.1 4645.1	4,4-dimethyl-5a-cholesta-8,24-dien-3b-ol:NADP+ D14-oxidoreductase Biosynthesis of steroids EC:1.3.1.70
r0060	1.5619	Cysteine Metabolism	ser_L[c] -> nh4[c] + pyr[c]		L-serine ammonia-lyase Glycine, serine and threonine metabolism EC:4.3.1.17
HISyLATthc	1.03529	Exchange	h[e] + arg_L[c] + his_L[e] -> h[c] + arg_L[e] + his_L[c]		Transport of Histidine by y+LAT1 or y+LAT2 with co-transporter of h in small intestine and kidney
CHOLESTTDe	1.06774	Exchange	chsterol[c] -> chsterol[e]		CHOLESTTDe
LGNCCOAtcx	1.13632	Exchange	h2o[c] + atp[c] + lgnccoa[c] -> adp[c] + h[c] + pi[c] + lgnccoa[x]		transport of lignocericyl coenzyme A from cytosol to peroxisome.
ARTFR202	1.16642	Exchange	h[m] + nadph[m] + 2 fadh2[m] + lnlncacoa[c] -> nadp[m] + 2 fad[m] + 1.125 R2coa_hs[c]		ARTFR202
PHEATB0tc	1.30141	Exchange	2 na1[e] + cl[e] + phe_L[e] -> 2 na1[c] + cl[c] + phe_L[c]		transport of L-Phenylalanine into the intestinal cells by ATB0 transporter
ILELAT1tc	1.36615	Exchange	ile_L[e] + leu_L[c] -> leu_L[e] + ile_L[c]		transport of L-Isoleucine by LAT1 in association with 4F2hc, across the apical surface of the memebranes.
ARTFR205	1.36689	Exchange	h[m] + nadph[m] + 2 fadh2[m] + dlnlcgcoa[c] -> nadp[m] + 2 fad[m] + 1.25 R2coa_hs[c]		ARTFR205
ARGATB0tc	1.42847	Exchange	2 na1[e] + arg_L[e] + cl[e] -> 2 na1[c] + arg_L[c] + cl[c]		transport of L-Arginine into the intestinal cells by ATB0 transporter
VALPHELAT2tc	1.44257	Exchange	val_L[e] + phe_L[c] -> phe_L[e] + val_L[c]		transport of L-Valine into the cell and efflux of L-Phenylalanine out of the cell by LAT2 on the basolateral surfaces of kidney and intestine.
PCHOLHSTDe	1.46438	Exchange	pchol_hs[c] -> pchol_hs[e]		PCHOLHSTDe
GLNATB0tc	1.52932	Exchange	2 na1[e] + gln_L[e] + cl[e] -> 2 na1[c] + gln_L[c] + cl[c]		Transport of L-Glutamine into the intestinal cells by ATB0 transporter
NACDe	1.66742	Exchange	nac[c] -> nac[e]		release of nicotinate at the basolateral surface
PRO1x	1.71886	Exchange	nad[c] + pro_L[c] -> 2 h[c] + nadh[c] + 1pyr5c[c]		PRO1x
PEHSFABPe	1.89656	Exchange	2 pe_hs[c] <=> 2 pe_hs[r]		transport of lysophosphatidylethanolamine into the enterocytes
PALFATPtc	2.72146	Exchange	atp[c] + coa[c] + hdca[e] -> amp[c] + ppi[c] + pmtcoa[c]		uptake of Hexadecanoate by the enterocytes
C30CPT1	2.76396	Exchange	ppcoa[c] + crn[c] -> coa[c] + pcrn[c]		production of propionylcarnitine
EX_fol(e)	1.02283	Exchange/demand reaction	fol[e] ->		exchange reaction for Folate
EX_biocyt(e)	1.03413	Exchange/demand reaction	biocyt[e] <=>		Biocytin exchange
EX_btn(e)	1.03413	Exchange/demand reaction	btn[e] <=>		Biotin exchange
EX_lys_L(e)	1.06692	Exchange/demand reaction	lys_L[e] <=>		L-Lysine exchange
EX_thymd(e)	1.12515	Exchange/demand reaction	thymd[e] <=>		Thymidine exchange
EX_lpchol_hs(e)	1.12941	Exchange/demand reaction	lpchol_hs[e] ->		exchange reaction for lysophosphatidylcholine
EX_5mthf(e)	1.18368	Exchange/demand reaction	5mthf[e] ->		exchange reaction for 5-Methyltetrahydrofolate
EX_gluala(e)	1.18586	Exchange/demand reaction	gluala[e] <=>		5-L-Glutamyl-L-alanine exchange
EX_thf(e)	1.22314	Exchange/demand reaction	thf[e] <=>		5,6,7,8-Tetrahydrofolate exchange
EX_dlnlcg(e)	1.24363	Exchange/demand reaction	dlnlcg[e] <=>		dihomo-gamma-linolenic acid (n-6) exchange
EX_9_cis_retfa(e)	1.26948	Exchange/demand reaction	9_cis_retfa[e] <=>		fatty acid 9-cis-retinol exchange
EX_5fthf(e)	1.67126	Exchange/demand reaction	5fthf[e] <=>		5-Formyltetrahydrofolate exchange
EX_uri(e)	3.11943	Exchange/demand reaction	uri[e] <=>		exchange reaction for Uridine
EX_pchol_hs(e)	3.20962	Exchange/demand reaction	pchol_hs[e] <=>		Phosphatidylcholine (homo sapiens) exchange
FAOXC164C143x	1.45544	Fatty acid oxidation	nad[x] + coa[x] + h2o[x] + 2hexdtetcoa[x] -> h[x] + nadh[x] + accoa[x] + 5tedtricoa[x]		fatty acid beta oxidation(C16:4-->C14:3)x
FAOXC143C123x	1.45544	Fatty acid oxidation	nad[x] + coa[x] + o2[x] + h2o[x] + 5tedtricoa[x] -> h[x] + nadh[x] + accoa[x] + h2o2[x] + 3dodtricoa[x]		fatty acid beta oxidation(C14:3-->C12:3)x
FAOXC184C164x	1.45544	Fatty acid oxidation	nad[x] + coa[x] + o2[x] + h2o[x] + strdnccoa[x] -> h[x] + nadh[x] + accoa[x] + h2o2[x] + 4hexdtetcoa[x]		fatty acid beta oxidation(C18:4-->C16:4)x
FAOXC165C164x	1.45544	Fatty acid oxidation	h[x] + nadph[x] + hexdpencoa[x] -> nadp[x] + 3hexdtetcoa[x]		fatty acid beta oxidation(C16:5-->C16:4)x
FAOXC164x	1.45544	Fatty acid oxidation	3hexdtetcoa[x] -> 2hexdtetcoa[x]		isomerization(C16:4)x
FAOXC164C165x	1.45544	Fatty acid oxidation	o2[x] + 4hexdtetcoa[x] -> h2o2[x] + hexdpencoa[x]		fatty acid beta oxidation(C16:4-->C16:5)x
FAOXC123x	1.45544	Fatty acid oxidation	3dodtricoa[x] -> 2dodtricoa[x]		isomerization(C12:3)x
FAOXC102C81x	1.45544	Fatty acid oxidation	nad[x] + coa[x] + h2o[x] + 2decdicoa[x] -> h[x] + nadh[x] + accoa[x] + octe5coa[x]		fatty acid beta oxidation(C10:2-->C8:1)x
FAOXC102C103x	1.45544	Fatty acid oxidation	o2[x] + dec47dicoa[x] -> h2o2[x] + dectricoa[x]		fatty acid beta oxidation(C10:2-->C10:3)x
FAOXC123C102x	1.45544	Fatty acid oxidation	nad[x] + coa[x] + h2o[x] + 2dodtricoa[x] -> h[x] + nadh[x] + accoa[x] + dec47dicoa[x]		fatty acid beta oxidation(C12:3-->C10:2)x
FAOXC81C61x	1.45544	Fatty acid oxidation	nad[x] + coa[x] + o2[x] + h2o[x] + octe5coa[x] -> h[x] + nadh[x] + accoa[x] + h2o2[x] + hexe3coa[x]		fatty acid beta oxidation(C8:1-->C6:1)x
FAOXC103C102x	1.45544	Fatty acid oxidation	h[x] + nadph[x] + dectricoa[x] -> nadp[x] + 3decdicoa[x]		fatty acid beta oxidation(C10:3-->C10:2)x
FAOXC102x	1.45544	Fatty acid oxidation	3decdicoa[x] -> 2decdicoa[x]		isomerization(C10:2)x
FAOXC61x	1.45544	Fatty acid oxidation	hexe3coa[x] -> hx2coa[x]		isomerization(C6:1)x
FAOXC61C4x	1.45544	Fatty acid oxidation	nad[x] + coa[x] + h2o[x] + hx2coa[x] -> h[x] + nadh[x] + accoa[x] + btcoa[x]		fatty acid beta oxidation(C6:1-->C4:0)x
RE2998M	1.01945	Fatty acid oxidation	o2[m] + CE0785[m] -> h2o2[m] + CE2432[m]	51.1	RE2998
RE1518M	1.02342	Fatty acid oxidation	fad[m] + CE0785[m] <=> fadh2[m] + CE2432[m]	33.1 51.1	RE1518
r1449	1.10218	Fatty acid oxidation	q10[m] + tdcoa[m] -> q10h2[m] + HC01412[m]		EC:1.3.3.6
r0652	1.10218	Fatty acid oxidation	nadp[m] + tdcoa[m] <=> h[m] + nadph[m] + HC01412[m]	10637.1 29920.1 5831.1 65263.1	trans-Tetradec-2-enoyl-CoA reductase Fatty acid elongation in mitochondria EC:1.3.1.38
RE3006M	1.12361	Fatty acid oxidation	coa[m] + CE4792[m] <=> accoa[m] + CE4794[m]	10449.1 3030.1 3032.1	RE3006
RE3004M	1.12361	Fatty acid oxidation	h2o[m] + CE5120[m] <=> CE4790[m]	1892.1 1962.1 3030.1 3032.1	RE3004
RE3005M	1.12361	Fatty acid oxidation	nad[m] + CE4790[m] <=> h[m] + nadh[m] + CE4792[m]	1962.1 3028.1 3033.1 3295.1	RE3005
RE3003M	1.12361	Fatty acid oxidation	CE5120[m] <=> CE5119[m]	10455.1 1632.1 1962.1	RE3003
RE3624M	1.12361	Fatty acid oxidation	o2[m] + CE4794[m] -> h2o2[m] + C05279[m]	51.1	RE3624
RE3001M	1.12361	Fatty acid oxidation	h[m] + nadph[m] + CE5118[m] <=> nadp[m] + CE5119[m]	1666.1	RE3001
RE2999M	1.12361	Fatty acid oxidation	CE2432[m] <=> CE5117[m]	10455.1 1632.1 1962.1	RE2999
RE3000M	1.12361	Fatty acid oxidation	CE5117[m] <=> CE5118[m]	1891.1	RE3000
RE1573M	1.12814	Fatty acid oxidation	C05280[m] <=> C05279[m]	10455.1 1632.1 1962.1	RE1573
RE1533M	1.12814	Fatty acid oxidation	coa[m] + CE2424[m] <=> accoa[m] + C05280[m]	10449.1 3030.1 3032.1	RE1533
RE1526M	1.12814	Fatty acid oxidation	nad[m] + CE2417[m] <=> h[m] + nadh[m] + CE2424[m]	1962.1 3028.1 3033.1 3295.1	RE1526
RE1521M	1.12814	Fatty acid oxidation	h2o[m] + CE2432[m] <=> CE2417[m]	1892.1 1962.1 3030.1 3032.1	RE1521
RE3626M	1.13201	Fatty acid oxidation	o2[m] + CE2431[m] -> h2o2[m] + CE2435[m]	51.1	RE3626
RE1519M	1.14091	Fatty acid oxidation	fad[m] + CE2431[m] <=> fadh2[m] + CE2435[m]	33.1 51.1	RE1519
FACOAL203	1.24363	Fatty acid oxidation	atp[c] + coa[c] + dlnlcg[c] -> amp[c] + ppi[c] + dlnlcgcoa[c]	2180.1	fatty-acid--CoA ligase
FAOXC161802m	1.28282	Fatty acid oxidation	4 h2o[m] + 4 coa[m] + 4 nad[m] + 3 fad[m] + hdd2coa[m] -> 4 h[m] + 4 nadh[m] + 4 accoa[m] + 3 fadh2[m] + occoa[m]	34.1 35.1	Beta oxidation fatty acid
r0310	1.28282	Fatty acid oxidation	pmtcoa[m] + q10[m] -> hdd2coa[m] + q10h2[m]		Palmitoyl-CoA:oxygen 2-oxidoreductase Fatty acid metabolism EC:1.3.3.6 EC:1.3.99.3
FACOAL204	1.32284	Fatty acid oxidation	atp[c] + coa[c] + arachd[c] -> amp[c] + ppi[c] + arachdcoa[c]	2180.1 2181.1 2181.2 2182.1 2182.2 22305.1 22305.2	fatty-acid--CoA ligase
FAOXC2251836m	1.59876	Fatty acid oxidation	2 h2o[m] + 2 coa[m] + 2 nad[m] + dcsptn1coa[m] -> 2 h[m] + 2 nadh[m] + 2 accoa[m] + lnlncgcoa[m]	34.1 35.1	Beta oxidation of fatty acid
FACOAL1831	1.87919	Fatty acid oxidation	atp[c] + coa[c] + lnlncg[c] -> amp[c] + ppi[c] + lnlncgcoa[c]	2180.1	fatty-acid--CoA ligase
DESAT20_1	1.26592	Fatty acid synthesis	o2[c] + h[c] + nadh[c] + dlnlcgcoa[c] -> 2 h2o[c] + nad[c] + arachdcoa[c]	3992.1	fatty acyl-CoA desaturase (n-C20:3CoA -> n-C20:4CoA)
RE0577C	1.87876	Fatty acid synthesis	h2o[c] + arachcoa[c] <=> h[c] + coa[c] + arach[c]	570.1 641371.1 641372.1	RE0577
FTHFCL	1.67126	Folate metabolism	atp[c] + 3 h[c] + 5fthf[c] -> adp[c] + pi[c] + methf[c]	10588.1	5-formethyltetrahydrofolate cyclo-ligase
GTHOm	1.36325	Glutamate metabolism	h[m] + nadph[m] + gthox[m] -> nadp[m] + 2 gthrd[m]	2936.1	glutathione oxidoreductase
GLUDxm	2.56151	Glutamate metabolism	h2o[m] + nad[m] + glu_L[m] <=> h[m] + akg[m] + nadh[m] + nh4[m]	2746.1 2747.1	glutamate dehydrogenase (NAD) (mitochondrial)
GTMLTe	1.18586	Glutathione metabolism	ala_L[c] + gthrd[c] -> cgly[e] + gluala[e]	2678.1 2678.2 2678.3 2679.1	g-glutamyltransferase (e)
r0022	1.36397	Glutathione metabolism	nad[m] + 2 gthrd[m] <=> h[m] + nadh[m] + gthox[m]	2936.1 AA532636.1	glutathione:NAD+ oxidoreductase Glutamate metabolism EC:1.8.1.7
PETOHMm_hs	1.65505	Glycerophospholipid metabolism	3 amet[m] + pe_hs[m] -> 3 h[m] + 3 ahcys[m] + pchol_hs[m]	10400.1 10400.2 10400.3	phosphatidylethanolamine N-methyltransferase
GCC2bim	1.01647	Glycine, serine, alanine and threonine metabolism	thf[m] + alpam[m] -> nh4[m] + mlthf[m] + dhlam[m]	1738.1 2653.1 2731.1 275.1	glycine-cleavage system (lipoamide) irreversible, mitochondrial
GCC2am	1.01647	Glycine, serine, alanine and threonine metabolism	h[m] + gly[m] + lpam[m] <=> co2[m] + alpam[m]	1738.1 2653.1 2731.1 275.1	glycine-cleavage complex (lipoamide), mitochondrial
GCC2cm	1.01647	Glycine, serine, alanine and threonine metabolism	nad[m] + dhlam[m] <=> h[m] + nadh[m] + lpam[m]	1738.1 2653.1 2731.1 275.1	glycine-cleavage complex (lipoamide), mitochondrial
ACSm	1.44835	Glycolysis/gluconeogenesis	coa[m] + atp[m] + ac[m] -> h[m] + accoa[m] + amp[m] + ppi[m]	84532.1	ACSm
PI45P5Pn	1.01516	Inositol phosphate metabolism	h2o[n] + pail45p_hs[n] -> pail4p_hs[n] + pi[n]		phosphatidylinositol-4,5-bisphosphate 5-phosphatase, nuclear
PI5P4Kn	1.25021	Inositol phosphate metabolism	atp[n] + pail5p_hs[n] -> h[n] + adp[n] + pail45p_hs[n]		phosphatidylinositol-5-phosphate 4-kinase, nuclear
PI3P5K	1.32326	Inositol phosphate metabolism	atp[c] + 2 h[c] + pail3p_hs[c] -> adp[c] + pail35p_hs[c]	23396.1 8394.1 8395.1	phosphatidylinositol 3-phosphate 5-kinase
CYTK13	1.40475	Nucleotide interconversion	datp[c] + dcmp[c] <=> dadp[c] + dcdp[c]	51727.1	cytidylate kinase (dCMP,dATP)
CYTK14	1.58543	Nucleotide interconversion	utp[c] + dcmp[c] <=> udp[c] + dcdp[c]	51727.1	cytidylate kinase (dCMP,UTP)
UMPK5	2.25606	Nucleotide interconversion	datp[c] + ump[c] <=> udp[c] + dadp[c]	51727.1	UMP kinase (dATP)
NDPK8n	2.31088	Nucleotide interconversion	atp[n] + dadp[n] <=> datp[n] + adp[n]	4830.1 4830.2 4831.1	nucleoside-diphosphate kinase (ATP:dADP), nuclear
UMPK2n	2.37129	Nucleotide interconversion	ctp[n] + ump[n] <=> udp[n] + cdp[n]	51727.1	UMP kinase (CTP),nuclear
UMPK7n	3.09219	Nucleotide interconversion	dgtp[n] + ump[n] <=> udp[n] + dgdp[n]	51727.1	UMP kinase (dGTP),nuclear
NDPK3n	4.29605	Nucleotide interconversion	atp[n] + cdp[n] <=> ctp[n] + adp[n]	4830.1 4830.2 4831.1	nucleoside-diphosphate kinase (ATP:CDP),nuclear
UMPK	4.74051	Nucleotide interconversion	atp[c] + 3 h[c] + ump[c] <=> adp[c] + udp[c]	51727.1	UMP kinase
FADH2ETC	1.08556	Oxidative phosphorylation	fadh2[m] + q10[m] -> fad[m] + q10h2[m]		Complex II reaction for respiratory chain
ACS2	1.60926	Propanoate metabolism	atp[c] + coa[c] + ppa[c] -> amp[c] + ppi[c] + ppcoa[c]	55902.1 55902.2 65985.1	acetyl-CoA synthase (propionate)
ADAe	1.13051	Purine catabolism	h[e] + h2o[e] + adn[e] -> ins[e] + nh4[e]	100.1	Adenosine deaminase, extracellular
ADA	1.35811	Purine catabolism	h2o[c] + h[c] + adn[c] -> nh4[c] + ins[c]	100.1	Adenosine deaminase
r2515	1.24657	Transport, endoplasmic reticular	crn[c] + HC02100[r] -> crn[r] + dlnlcg[c]		Utilized transport
GLCter	1.59123	Transport, endoplasmic reticular	glc_D[c] <=> glc_D[r]		glucose transport, endoplasmic reticulum
PE_HSter	1.89914	Transport, endoplasmic reticular	pe_hs[c] <=> pe_hs[r]		phosphatidylethanolamine scramblase
r2046	1.00162	Transport, extracellular	his_L[e] + phe_L[c] -> phe_L[e] + his_L[c]	9057.1	Amino Acid-Polyamine-Organocation (APC) TCDB:2.A.3.8.15
r1906	1.0088	Transport, extracellular	na1[e] + ile_L[e] + leu_L[c] -> na1[c] + leu_L[e] + ile_L[c]	9057.1	Y+LAT2 Utilized transport
r1978	1.0123	Transport, extracellular	na1[e] + thr_L[e] + arg_L[c] -> na1[c] + thr_L[c] + arg_L[e]	9057.1	Y+LAT2 Utilized transport
SERt4	1.03975	Transport, extracellular	na1[e] + ser_L[e] -> na1[c] + ser_L[c]	11254.1 54407.1 55089.1 81539.1	L-serine via sodium symport
ARGt4	1.06044	Transport, extracellular	na1[e] + arg_L[e] -> na1[c] + arg_L[c]	11254.1	L-arginine transport in via sodium symport
r1723	1.06152	Transport, extracellular	na1[e] + ser_L[e] + tyr_L[c] -> na1[c] + ser_L[c] + tyr_L[e]	8140.1	Y+LAT2 Utilized transport
r1050	1.06468	Transport, extracellular	chsterol[e] <=> chsterol[c]		Vesicular transport
r1739	1.09325	Transport, extracellular	na1[e] + cys_L[c] + met_L[e] -> na1[c] + cys_L[e] + met_L[c]	8140.1	Y+LAT2 Utilized transport
r2059	1.09577	Transport, extracellular	ser_L[c] + citr_L[e] -> ser_L[e] + citr_L[c]	9057.1	Amino Acid-Polyamine-Organocation (APC) TCDB:2.A.3.8.15
METLEUex	1.12221	Transport, extracellular	met_L[e] + leu_L[c] -> met_L[c] + leu_L[e]	6520.1 8140.1	Methionine/Leucine exchange (Met in)
r1918	1.12923	Transport, extracellular	na1[e] + ala_L[e] + arg_L[c] -> na1[c] + ala_L[c] + arg_L[e]	9057.1	Y+LAT2 Utilized transport
r1914	1.13729	Transport, extracellular	na1[e] + orn[c] + gly[e] -> na1[c] + gly[c] + orn[e]	9057.1	Y+LAT2 Utilized transport
r1716	1.13883	Transport, extracellular	na1[e] + gln_L[e] + ile_L[c] -> na1[c] + gln_L[c] + ile_L[e]	8140.1	Y+LAT2 Utilized transport
r1715	1.15714	Transport, extracellular	na1[e] + gln_L[e] + hom_L[c] -> na1[c] + gln_L[c] + hom_L[e]	8140.1	Y+LAT2 Utilized transport
r1916	1.1853	Transport, extracellular	na1[e] + gly[e] + citr_L[c] -> na1[c] + gly[c] + citr_L[e]	9057.1	Y+LAT2 Utilized transport
THFt2	1.22314	Transport, extracellular	h2o[c] + thf[e] <=> h2o[e] + thf[c]	6573.1 6573.2	tetrahydrofolate transport via anion exchange
r1777	1.22382	Transport, extracellular	na1[e] + gly[c] + tyr_L[e] -> na1[c] + gly[e] + tyr_L[c]	9057.1	Y+LAT2 Utilized transport
METt4	1.22902	Transport, extracellular	na1[e] + met_L[e] -> na1[c] + met_L[c]	11254.1 54407.1 6584.1 81539.1	L-methionine transport in via sodium symport
DLNLCGt	1.24363	Transport, extracellular	dlnlcg[e] <=> dlnlcg[c]		fatty acid transport via diffusion
r1962	1.25528	Transport, extracellular	na1[e] + lys_L[c] + pro_L[e] -> na1[c] + lys_L[e] + pro_L[c]	9057.1	Y+LAT2 Utilized transport
r1975	1.28031	Transport, extracellular	na1[e] + val_L[e] + his_L[c] -> na1[c] + his_L[e] + val_L[c]	9057.1	Y+LAT2 Utilized transport
PIt8	1.30364	Transport, extracellular	1.5 na1[e] + pi[e] <=> pi[c] + 1.5 na1[c]	6574.1 6575.1	phosphate transport in/out via Na+ symporter
THYMDt1	1.31612	Transport, extracellular	thymd[e] -> thymd[c]	2030.1 3177.1	thymd transport
GLCMter	1.33544	Transport, extracellular	glc_D[r] -> glc_D[e]		glucose transport via membrane vesicle
r1797	1.35737	Transport, extracellular	na1[e] + cys_L[e] + trp_L[c] -> na1[c] + cys_L[c] + trp_L[e]	9057.1	Y+LAT2 Utilized transport
r1730	1.37075	Transport, extracellular	na1[e] + ser_L[e] + hom_L[c] -> na1[c] + ser_L[c] + hom_L[e]	8140.1	Y+LAT2 Utilized transport
r1984	1.39663	Transport, extracellular	na1[e] + orn[c] + hom_L[e] -> na1[c] + orn[e] + hom_L[c]	9057.1	Y+LAT2 Utilized transport
r1749	1.42849	Transport, extracellular	na1[e] + gln_L[c] + trp_L[e] -> na1[c] + gln_L[e] + trp_L[c]	8140.1	Y+LAT2 Utilized transport
r1747	1.43321	Transport, extracellular	na1[e] + gly[c] + trp_L[e] -> na1[c] + gly[e] + trp_L[c]	8140.1	Y+LAT2 Utilized transport
r1865	1.46386	Transport, extracellular	na1[e] + val_L[e] + hom_L[c] -> na1[c] + hom_L[e] + val_L[c]	9057.1	Y+LAT2 Utilized transport
r1853	1.48488	Transport, extracellular	na1[e] + ala_L[c] + val_L[e] -> na1[c] + ala_L[e] + val_L[c]	9057.1	Y+LAT2 Utilized transport
r1905	1.50864	Transport, extracellular	na1[e] + cys_L[c] + ile_L[e] -> na1[c] + cys_L[e] + ile_L[c]	9057.1	Y+LAT2 Utilized transport
r1728	1.52494	Transport, extracellular	na1[e] + ser_L[e] + val_L[c] -> na1[c] + ser_L[c] + val_L[e]	8140.1	Y+LAT2 Utilized transport
r1679	1.52666	Transport, extracellular	na1[e] + cys_L[c] + gly[e] -> na1[c] + cys_L[e] + gly[c]	8140.1	Y+LAT2 Utilized transport
r1803	1.56183	Transport, extracellular	na1[e] + cys_L[e] + val_L[c] -> na1[c] + cys_L[c] + val_L[e]	9057.1	Y+LAT2 Utilized transport
r1920	1.56603	Transport, extracellular	na1[e] + ala_L[e] + his_L[c] -> na1[c] + ala_L[c] + his_L[e]	9057.1	Y+LAT2 Utilized transport
ASCBt	1.58375	Transport, extracellular	ascb_L[e] <=> ascb_L[c]		L-ascorbate transport via facilitated diffusion
SERGLYexR	1.58767	Transport, extracellular	gly[c] + ser_L[e] <=> gly[e] + ser_L[c]	56301.1 6520.1	L-Serine/Glycine reversible exchange
r1695	1.59032	Transport, extracellular	na1[e] + ala_L[e] + leu_L[c] -> na1[c] + ala_L[c] + leu_L[e]	8140.1	Y+LAT2 Utilized transport
r2068	1.6356	Transport, extracellular	citr_L[e] + val_L[c] -> citr_L[c] + val_L[e]	9057.1	Amino Acid-Polyamine-Organocation (APC) TCDB:2.A.3.8.15
r1639	1.65252	Transport, extracellular	cys_L[e] + thr_L[c] <=> cys_L[c] + thr_L[e]	8140.1	Amino Acid-Polyamine-Organocation (APC) TCDB:2.A.3.8.1
r1746	1.66028	Transport, extracellular	na1[e] + met_L[e] + ile_L[c] -> na1[c] + met_L[c] + ile_L[e]	8140.1	Y+LAT2 Utilized transport
5FTHFt2	1.67126	Transport, extracellular	h2o[c] + 5fthf[e] <=> h2o[e] + 5fthf[c]	6573.1 6573.2	5-formyltetrahydrofolate transport via anion exchange
r1852	1.72878	Transport, extracellular	na1[e] + gly[c] + val_L[e] -> na1[c] + gly[e] + val_L[c]	9057.1	Y+LAT2 Utilized transport
GLNCYSNaEx	1.75553	Transport, extracellular	na1[e] + cys_L[c] + gln_L[e] -> na1[c] + cys_L[e] + gln_L[c]	6510.1	L-cysteine/L-glutamine Na-dependent exchange (Gln-L in)
r1860	1.76494	Transport, extracellular	na1[e] + cys_L[c] + val_L[e] -> na1[c] + cys_L[e] + val_L[c]	9057.1	Y+LAT2 Utilized transport
NACUP	1.76953	Transport, extracellular	nac[e] -> nac[c]		Nicotinic acid uptake
r1939	1.77273	Transport, extracellular	na1[e] + orn[c] + trp_L[e] -> na1[c] + orn[e] + trp_L[c]	9057.1	Y+LAT2 Utilized transport
RETFAt2	1.78144	Transport, extracellular	11_cis_retfa[c] -> 11_cis_retfa[e]		fatty acid retinol efflux (11-cis)
ASNSERNaEx	1.78214	Transport, extracellular	na1[e] + asn_L[e] + ser_L[c] -> na1[c] + asn_L[c] + ser_L[e]	6510.1	L-serine/L-asparagine Na-dependent exchange (Asn-L in)
r2055	1.82751	Transport, extracellular	his_L[e] + ile_L[c] -> ile_L[e] + his_L[c]	9057.1	Amino Acid-Polyamine-Organocation (APC) TCDB:2.A.3.8.15
r2032	1.92042	Transport, extracellular	cys_L[c] + orn[e] -> orn[c] + cys_L[e]	9057.1	Amino Acid-Polyamine-Organocation (APC) TCDB:2.A.3.8.15
r1850	1.94583	Transport, extracellular	na1[e] + asn_L[e] + hom_L[c] -> na1[c] + asn_L[c] + hom_L[e]	9057.1	Y+LAT2 Utilized transport
r1964	2.0123	Transport, extracellular	na1[e] + orn[c] + pro_L[e] -> na1[c] + orn[e] + pro_L[c]	9057.1	Y+LAT2 Utilized transport
r1887	2.09449	Transport, extracellular	na1[e] + hom_L[e] + trp_L[c] -> na1[c] + trp_L[e] + hom_L[c]	9057.1	Y+LAT2 Utilized transport
r1722	2.15725	Transport, extracellular	na1[e] + ser_L[e] + phe_L[c] -> na1[c] + ser_L[c] + phe_L[e]	8140.1	Y+LAT2 Utilized transport
r2028	2.18618	Transport, extracellular	met_L[c] + orn[e] -> orn[c] + met_L[e]	9057.1	Amino Acid-Polyamine-Organocation (APC) TCDB:2.A.3.8.15
CRNt	2.23955	Transport, extracellular	crn[e] <=> crn[c]	6584.1	L-carnitine reversible transport
CRNtuNa	2.23955	Transport, extracellular	na1[e] + crn[e] -> na1[c] + crn[c]	6584.1	L-carnitine inward transport by Na+ symport
r2041	2.28287	Transport, extracellular	ala_L[c] + his_L[e] -> ala_L[e] + his_L[c]	9057.1	Amino Acid-Polyamine-Organocation (APC) TCDB:2.A.3.8.15
r1698	2.32731	Transport, extracellular	na1[e] + ala_L[e] + val_L[c] -> na1[c] + ala_L[c] + val_L[e]	8140.1	Y+LAT2 Utilized transport
ADNt4	2.32899	Transport, extracellular	na1[e] + adn[e] -> na1[c] + adn[c]	64078.1 9153.1 9154.1 9154.2	adenosine transport (Na/Adn cotransport)
r1811	2.4093	Transport, extracellular	na1[e] + met_L[c] + leu_L[e] -> na1[c] + met_L[e] + leu_L[c]	9057.1	Y+LAT2 Utilized transport
r1976	2.61812	Transport, extracellular	na1[e] + citr_L[c] + val_L[e] -> na1[c] + citr_L[e] + val_L[c]	9057.1	Y+LAT2 Utilized transport
r1791	2.78271	Transport, extracellular	na1[e] + tyr_L[e] + ile_L[c] -> na1[c] + ile_L[e] + tyr_L[c]	9057.1	Y+LAT2 Utilized transport
r1996	2.96651	Transport, extracellular	lys_L[e] + met_L[c] -> lys_L[c] + met_L[e]	9057.1	Amino Acid-Polyamine-Organocation (APC) TCDB:2.A.3.8.15
METtec	4.18436	Transport, extracellular	met_L[e] <=> met_L[c]	124935.1 8501.1	L-methionine transport via diffusion (extracellular to cytosol)
r1367	1.24657	Transport, lysosomal	HC02100[l] -> HC02100[r]		Vesicular transport
r1368	1.24657	Transport, lysosomal	dlnlcg[c] -> HC02100[l]		Vesicular transport
r0838	1.06312	Transport, mitochondrial	nh4[c] <=> nh4[m]	26275.1	Free diffusion
DNDPt40m	1.15854	Transport, mitochondrial	dadp[m] + dutp[c] -> dadp[c] + dutp[m]	60386.1	dUTP transport via dADP antiport
r2433	1.31277	Transport, mitochondrial	acrn[c] + crn[m] -> acrn[m] + crn[c]		Mitochondrial Carrier (MC) TCDB:2.A.29.8.3
DNDPt28m	1.63597	Transport, mitochondrial	dcdp[c] + dgdp[m] -> dgdp[c] + dcdp[m]	60386.1	dCDP transport via dGDP antiport
PCFLOPm	1.65505	Transport, mitochondrial	h2o[c] + atp[c] + pchol_hs[m] -> adp[c] + h[c] + pi[c] + pchol_hs[c]	57194.1	phosphatidylcholine flippase
DNDPt36m	1.67975	Transport, mitochondrial	dgdp[c] + dcdp[m] -> dcdp[c] + dgdp[m]	60386.1	dGDP transport via dCDP antiport
DNDPt14m	1.94262	Transport, mitochondrial	dtdp[m] + dudp[c] -> dtdp[c] + dudp[m]	60386.1	dUDP transport via dTDP antiport
r1429	1.20828	Transport, peroxisomal	glyc3p[c] <=> glyc3p[x]		Free diffusion
GLY3Pt	1.20828	Transport, peroxisomal	glyc3p[x] -> glyc3p[c]		Glycerol phopshate exit into cytosol
O2tp	1.23122	Transport, peroxisomal	o2[c] <=> o2[x]		O2 transport, peroxisomal
LGNCCOAtx	1.69927	Transport, peroxisomal	lgnccoa[c] <=> lgnccoa[x]		fatty acid intracellular transport
34DHPLACOX_NADP_	1.16247	Tyrosine metabolism	h2o[c] + nadp[c] + 34dhpac[c] <=> 2 h[c] + nadph[c] + 34dhpha[c]	218.1 221.1 222.1	3,4-Dihydroxyphenylacetaldehyde:NADP+ oxidoreductase
34DHPLACOX	1.16247	Tyrosine metabolism	h2o[c] + nad[c] + 34dhpac[c] -> 2 h[c] + nadh[c] + 34dhpha[c]	218.1 220.1 221.1 222.1	3,4-Dihydroxyphenylacetaldehyde:NAD+ oxidoreductase
LRAT1	1.71261	Vitamin A metabolism	pchol_hs[c] + retinol_cis_11[c] -> lpchol_hs[c] + 11_cis_retfa[c]		Lecithin retinol acyltransferase (11-cis)
RE1903R	1.97458	Vitamin A metabolism	h2o[r] + nad[r] + retinal_cis_13[r] -> 2 h[r] + nadh[r] + 13_cis_retn[r]		RE1903
RE2659R	1.97458	Vitamin A metabolism	retn[r] <=> 13_cis_retn[r]		RE2659

## Sheet: down
Rxn name	foldchange(log2)	Subsystem	Formula	Genes	Rxn description
ALAR	-1.33738	Alanine and aspartate metabolism	ala_L[c] <=> ala_D[c]	11212.1	alanine racemase
BDHm	-2.32935	Butanoate metabolism	nad[m] + bhb[m] <=> h[m] + nadh[m] + acac[m]	622.1 622.2 622.3	(R)-3-Hydroxybutanoate:NAD+ oxidoreductase
ACACT1x	-1.67916	Cholesterol metabolism	2 accoa[x] -> aacoa[x] + coa[x]	39.1	acetyl-CoA C-acetyltransferase, mitochondrial
r0463	-1.67916	Cholesterol metabolism	h[x] + coa[x] + hmgcoa[x] <=> accoa[x] + aacoa[x] + h2o[x]		(S)-3-Hydroxy-3-methylglutaryl-CoA acetoacetyl-CoA-lyase (CoA-acetylating) Synthesis and degradation of ketone bodies / Valine, leucine and isoleucine degradation / Butanoate metabolism EC:2.3.3.10
GGT6	-2.57361	Eicosanoid metabolism	glu_L[c] + leuktrE4[c] <=> h2o[c] + leuktrF4[c]		Gamma-glutamyltransferase
PGS	-2.22509	Eicosanoid metabolism	2 o2[c] + h[c] + nadph[c] + arachd[c] -> h2o[c] + nadp[c] + prostgh2[c]	5742.1 5743.1	Prostaglandin G/H synthase
RE3524R	-1.00655	Eicosanoid metabolism	prostgd2[r] <=> h2o[r] + CE4876[r]		RE3524
RE3421R	-1.00655	Eicosanoid metabolism	C05957[r] <=> CE4876[r]		RE3421
RE2079R	-1.00655	Eicosanoid metabolism	prostgd2[r] <=> h2o[r] + C05957[r]		RE2079
C9BRxtc	-3.51786	Exchange	dmnoncrn[x] <=> dmnoncrn[c]		transport of dimethylnonanoylcarnitine from peroxisomes to cytosol
SERATB0tc	-2.67803	Exchange	2 na1[e] + ser_L[e] + cl[e] -> 2 na1[c] + ser_L[c] + cl[c]		transport of L-Serine into the intestinal cells by ATB0 transporter
ARTFR209	-2.20657	Exchange	2 h[m] + 2 nadph[m] + 2 fadh2[m] + adrncoa[c] -> 2 nadp[m] + 2 fad[m] + 1.375 R2coa_hs[c]		ARTFR209
ARTFR212	-2.16323	Exchange	2 h[m] + 2 nadph[m] + 3 fadh2[m] + dcsptn1coa[c] -> 2 nadp[m] + 3 fad[m] + 1.375 R2coa_hs[c]		ARTFR212
VALLAT1tc	-1.80979	Exchange	val_L[e] + leu_L[c] -> leu_L[e] + val_L[c]		transport of L-Valine by LAT1 in association with 4F2hc, across the apical surface of the memebranes.
TYRPHELAT2tc	-1.72662	Exchange	tyr_L[e] + phe_L[c] -> phe_L[e] + tyr_L[c]		transport of L-Tyrosine into the cell and efflux of L-Phenylalanine out of the cell by LAT2 on the basolateral surfaces of kidney and intestine.
ARTPLM3m	-1.72634	Exchange	Rtotal3coa[m] -> pmtcoa[m]		ARTPLM3m
STRDNCCOAtxc	-1.62075	Exchange	h2o[c] + atp[c] + strdnccoa[c] -> adp[c] + h[c] + pi[c] + strdnccoa[x]		transport of stearidonylcoa into peroxisomes.
SBTle	-1.33564	Exchange	sbt_D[e] -> sbt_D[c]		diffusion of sorbitol into the enterocytes
METATB0tc	-1.26926	Exchange	2 na1[e] + cl[e] + met_L[e] -> 2 na1[c] + met_L[c] + cl[c]		transport of L-Methionine into the intestinal cells by ATB0 transporter
TTDCAFATPc	-1.18296	Exchange	atp[c] + coa[c] + ttdca[e] -> amp[c] + ppi[c] + tdcoa[c]		uptake of uptake of Hexadecanoate by the enterocytes by the enterocytes
ETOHMO	-1.16583	Exchange	o2[c] + h[c] + nadph[c] + etoh[c] -> 2 h2o[c] + nadp[c] + acald[c]		ETOHMO
THRPHELAT2tc	-1.10322	Exchange	thr_L[e] + phe_L[c] -> thr_L[c] + phe_L[e]		transport of L-Threonine into the cell and efflux of L-Phenylalanine out of the cell by LAT2 on the basolateral surfaces of kidney and intestine.
RTOTAL3FATPc	-1.10191	Exchange	atp[c] + coa[c] + Rtotal3[e] -> amp[c] + ppi[c] + Rtotal3coa[c]		uptake of Rtotal3 by enterocytes
ACOAHi	-1.02251	Exchange	h2o[c] + accoa[c] -> h[c] + coa[c] + ac[c]		ACOAHi
EX_arab_L(e)	-2.64094	Exchange/demand reaction	arab_L[e] <=>		L-Arabinose exchange
EX_bhb(e)	-2.32935	Exchange/demand reaction	bhb[e] <=>		(R)-3-Hydroxybutanoate transport via H+ symport
EX_retinol_cis_11(e)	-2.06243	Exchange/demand reaction	retinol_cis_11[e] <=>		cis-11-retinol exchange
EX_gthrd(e)	-1.88967	Exchange/demand reaction	gthrd[e] <=>		Reduced glutathione exchange
EX_amp(e)	-1.76643	Exchange/demand reaction	amp[e] <=>		AMP exchange
EX_pi(e)	-1.6657	Exchange/demand reaction	pi[e] <=>		Phosphate exchange
EX_gtp(e)	-1.61662	Exchange/demand reaction	gtp[e] <=>		GTP exchange
EX_cys_L(e)	-1.56935	Exchange/demand reaction	cys_L[e] ->		exchange reaction for L-cysteine
EX_leuktrA4(e)	-1.43416	Exchange/demand reaction	leuktrA4[e] <=>		leukotriene A4 exchange
EX_dcsptn1(e)	-1.37664	Exchange/demand reaction	dcsptn1[e] <=>		docosa-4,7,10,13,16-pentaenoic acid (n-6) exchange
EX_ala_D(e)	-1.33738	Exchange/demand reaction	ala_D[e] <=>		D-Alanine exchange
EX_sbt-d(e)	-1.33564	Exchange/demand reaction	sbt_D[e] ->		exchange reaction for D-Sorbitol
EX_Rtotal2(e)	-1.22699	Exchange/demand reaction	Rtotal2[e] <=>		R total 2 position exchange
EX_adrn(e)	-1.19911	Exchange/demand reaction	adrn[e] <=>		adrenic acid exchange
EX_dhdascb(e)	-1.19589	Exchange/demand reaction	dhdascb[e] ->		exchange reaction for dehydroascorbide(1-)
EX_ascb_L(e)	-1.19589	Exchange/demand reaction	ascb_L[e] <=>		L-Ascorbate exchange
EX_csn(e)	-1.1868	Exchange/demand reaction	csn[e] <=>		Cytosine exchange
EX_spc_hs(e)	-1.13968	Exchange/demand reaction	spc_hs[e] <=>		sphingosylphosphorylcholine (homo sapiens) exchange
EX_ala_L(e)	-1.08999	Exchange/demand reaction	ala_L[e] <=>		exchange reaction for L-alanine
EX_tyr_L(e)	-1.06297	Exchange/demand reaction	tyr_L[e] <=>		L-Tyrosine exchange
EX_utp(e)	-1.05746	Exchange/demand reaction	utp[e] <=>		UTP exchange
EX_2mcit(e)	-1.05047	Exchange/demand reaction	2mcit[e] <=>		2-Methylcitrate exchange
EX_glc(e)	-1.04052	Exchange/demand reaction	glc_D[e] <=>		D-Glucose exchange
EX_leuktrE4(e)	-1.01736	Exchange/demand reaction	leuktrE4[e] <=>		leukotriene E4 exchange
FAOXC184C163x	-1.14883	Fatty acid oxidation	nad[x] + coa[x] + h2o[x] + 2octdectecoa[x] -> h[x] + nadh[x] + accoa[x] + 4hexdtricoa[x]		fatty acid beta oxidation(C18:4-->C16:3)x
FAOXC204C205x	-1.14883	Fatty acid oxidation	o2[x] + eitetcoa[x] -> h2o2[x] + eipencoa[x]		fatty acid beta oxidation(C20:4-->C20:5)x
FAOXC163C164x	-1.14883	Fatty acid oxidation	o2[x] + 4hexdtricoa[x] -> h2o2[x] + hexdectecoa[x]		fatty acid beta oxidation(C16:3-->C16:4)x
FAOXC225C204x	-1.14883	Fatty acid oxidation	nad[x] + coa[x] + h2o[x] + 2docopencoa[x] -> h[x] + nadh[x] + accoa[x] + eitetcoa[x]		fatty acid beta oxidation(C22:5-->C20:4)x
FAOXC184x	-1.14883	Fatty acid oxidation	3octdectecoa[x] -> 2octdectecoa[x]		isomerization(C18:4)x
FAOXC205C184x	-1.14883	Fatty acid oxidation	nad[x] + coa[x] + h2o[x] + eipencoa[x] -> h[x] + nadh[x] + accoa[x] + 3octdectecoa[x]		fatty acid beta oxidation(C20:5-->C18:4)x
FAOXC163C142x	-1.14883	Fatty acid oxidation	nad[x] + coa[x] + h2o[x] + 2hexdtricoa[x] -> h[x] + nadh[x] + accoa[x] + tetdecdicoa[x]		fatty acid beta oxidation(C16:3-->C14:2)x
FAOXC101C102x	-1.14883	Fatty acid oxidation	o2[x] + dece4coa[x] -> h2o2[x] + dec24dicoa[x]		fatty acid beta oxidation(C10:1-->C10:2)x
FOAXC122C101x	-1.14883	Fatty acid oxidation	nad[x] + coa[x] + h2o[x] + 2ddecdicoa[x] -> h[x] + nadh[x] + accoa[x] + dece4coa[x]		fatty acid beta oxidation(C12:2-->C10:1)x
FAOXC164C163x	-1.14883	Fatty acid oxidation	h[x] + nadph[x] + hexdectecoa[x] -> nadp[x] + 3hexdtricoa[x]		fatty acid beta oxidation(C16:4-->C16:3)x
FAOXC163x	-1.14883	Fatty acid oxidation	3hexdtricoa[x] -> 2hexdtricoa[x]		isomerization(C16:3)x
FAOXC101C8x	-1.14883	Fatty acid oxidation	nad[x] + coa[x] + h2o[x] + dc2coa[x] -> h[x] + nadh[x] + accoa[x] + occoa[x]		fatty acid beta oxidation(C10:1-->C8:0)x
FAOXC225x	-1.14883	Fatty acid oxidation	3docopencoa[x] -> 2docopencoa[x]		isomerization(C22:5)x
FAOXC142C122x	-1.14883	Fatty acid oxidation	nad[x] + coa[x] + o2[x] + h2o[x] + tetdecdicoa[x] -> h[x] + nadh[x] + accoa[x] + h2o2[x] + 3ddecdicoa[x]		fatty acid beta oxidation(C14:2-->C12:2)x
FAOXC102C101x	-1.14883	Fatty acid oxidation	h[x] + nadph[x] + dec24dicoa[x] -> nadp[x] + dece3coa[x]		fatty acid beta oxidation(C10:2-->C10:1)x
FAOXC225C226x	-1.14883	Fatty acid oxidation	o2[x] + dcsptn1coa[x] -> h2o2[x] + docohexcoa[x]		fatty acid beta oxidation(C22:5-->C22:6)x
FAOXC122x	-1.14883	Fatty acid oxidation	3ddecdicoa[x] -> 2ddecdicoa[x]		isomerization(C12:2)x
FAOXC226C225x	-1.14883	Fatty acid oxidation	h[x] + nadph[x] + docohexcoa[x] -> nadp[x] + 3docopencoa[x]		fatty acid beta oxidation(C22:6-->C22:5)x
FAOXC101x	-1.14883	Fatty acid oxidation	dece3coa[x] -> dc2coa[x]		isomerization(C10:1)x
DMNONCRNt	-3.51786	Fatty acid oxidation	dmnoncrn[c] <=> dmnoncrn[m]		4,8 dimethylnonanoyl carnitine transport (mitochondria)
STRDNCCPT1	-2.56447	Fatty acid oxidation	crn[c] + strdnccoa[c] -> coa[c] + strdnccrn[c]	126129.1 1374.1 1375.1 1375.2 1375.3 1375.4	carnitine O-palmitoyltransferase
STRDNCCPT2	-2.56447	Fatty acid oxidation	coa[m] + strdnccrn[m] -> crn[m] + strdnccoa[m]	1376.1	carnitine transferase
STRDNCCRNt	-2.56447	Fatty acid oxidation	strdnccrn[c] -> strdnccrn[m]	788.1	transport into the mitochondria (carnitine)
TTDCPT2	-2.27693	Fatty acid oxidation	coa[m] + ttdcrn[m] -> crn[m] + tdcoa[m]	1376.1	carnitine transferase
TTDCRNt	-2.27693	Fatty acid oxidation	ttdcrn[c] -> ttdcrn[m]	788.1	transport into the mitochondria (carnitine)
TTDCPT1	-2.27693	Fatty acid oxidation	crn[c] + tdcoa[c] -> coa[c] + ttdcrn[c]	126129.1 1374.1 1375.1 1375.2 1375.3 1375.4	carnitine O-palmitoyltransferase
FAOXC183803m	-2.01715	Fatty acid oxidation	5 h2o[m] + 5 coa[m] + 5 nad[m] + 2 fad[m] + lnlncacoa[m] -> 5 h[m] + 5 nadh[m] + 5 accoa[m] + 2 fadh2[m] + occoa[m]	34.1 35.1	Beta oxidation of fatty acid
LNLNCACPT2	-2.01715	Fatty acid oxidation	coa[m] + lnlncacrn[m] -> crn[m] + lnlncacoa[m]	1376.1	carnitine transferase
LNLNCACRNt	-2.01715	Fatty acid oxidation	lnlncacrn[c] -> lnlncacrn[m]	788.1	transport into the mitochondria (carnitine)
LNLNCACPT1	-2.01715	Fatty acid oxidation	crn[c] + lnlncacoa[c] -> coa[c] + lnlncacrn[c]	126129.1 1374.1 1375.1 1375.2 1375.3 1375.4	carnitine O-palmitoyltransferase
VACCCRNt	-1.93689	Fatty acid oxidation	vacccrn[c] -> vacccrn[m]	788.1	transport into the mitochondria (carnitine)
VACCCPT1	-1.93689	Fatty acid oxidation	crn[c] + vacccoa[c] -> coa[c] + vacccrn[c]	126129.1 1374.1 1375.1 1375.2 1375.3 1375.4	carnitine O-palmitoyltransferase
VACCCPT2	-1.93689	Fatty acid oxidation	coa[m] + vacccrn[m] -> crn[m] + vacccoa[m]	1376.1	carnitine transferase
FAOXC1811602m	-1.93689	Fatty acid oxidation	5 h2o[m] + 5 coa[m] + 5 nad[m] + 4 fad[m] + vacccoa[m] -> 5 h[m] + 5 nadh[m] + 5 accoa[m] + 4 fadh2[m] + occoa[m]	34.1 35.1	Beta oxidation fatty acid
FAOXC18480m	-1.8948	Fatty acid oxidation	5 h2o[m] + 5 coa[m] + 5 nad[m] + fad[m] + strdnccoa[m] -> 5 h[m] + 5 nadh[m] + 5 accoa[m] + fadh2[m] + occoa[m]	34.1 35.1	Beta oxidation of fatty acid
FAOXC2251836x	-1.85418	Fatty acid oxidation	2 nad[x] + 2 coa[x] + 2 h2o[x] + dcsptn1coa[x] -> 2 h[x] + 2 nadh[x] + 2 accoa[x] + lnlncgcoa[x]	1962.1 30.1 3295.1 51.1 51.2	Beta oxidation of long chain fatty acid
RTOTAL3CRNCPT1	-1.72634	Fatty acid oxidation	crn[c] + Rtotal3coa[c] -> coa[c] + Rtotal3crn[c]	126129.1 1374.1 1375.1 1375.2 1375.4	carnitine fatty-acyl transferase
RTOTAL3CRNt	-1.72634	Fatty acid oxidation	Rtotal3crn[c] -> Rtotal3crn[m]	788.1	R group transport into the mitochondria
RTOTAL3CRNCPT2	-1.72634	Fatty acid oxidation	coa[m] + Rtotal3crn[m] -> crn[m] + Rtotal3coa[m]	1376.1	R group transport into the mitochondria
FACOAL1812	-1.65079	Fatty acid oxidation	atp[c] + coa[c] + vacc[c] -> amp[c] + ppi[c] + vacccoa[c]	2180.1	fatty-acid--CoA ligase
C161CPT1	-1.54638	Fatty acid oxidation	crn[c] + hdcoa[c] -> coa[c] + hdcecrn[c]	126129.1 1374.1 1375.1 1375.2 1375.3 1375.4	production of palmitoleoylcarnitine
C161CRNt	-1.54638	Fatty acid oxidation	hdcecrn[c] -> hdcecrn[m]	788.1	C161 transport into the mitochondria
C161CPT2	-1.54638	Fatty acid oxidation	coa[m] + hdcecrn[m] -> crn[m] + hdcoa[m]	1376.1	transport of Hexadecenoyl-CoA into mitochondrial matrix
LNLNCGCRNt	-1.51725	Fatty acid oxidation	lnlncgcrn[c] -> lnlncgcrn[m]	788.1	transport into the mitochondria (carnitine)
LNLNCGCPT2	-1.51725	Fatty acid oxidation	coa[m] + lnlncgcrn[m] -> crn[m] + lnlncgcoa[m]	1376.1	carnitine transferase
LNLNCGCPT1	-1.51725	Fatty acid oxidation	crn[c] + lnlncgcoa[c] -> coa[c] + lnlncgcrn[c]	126129.1 1374.1 1375.1 1375.2 1375.3 1375.4	carnitine O-palmitoyltransferase
FACOAL2251	-1.37664	Fatty acid oxidation	atp[c] + coa[c] + dcsptn1[c] -> amp[c] + ppi[c] + dcsptn1coa[c]	2180.1	fatty-acid--CoA ligase
FAOXC18480x	-1.36302	Fatty acid oxidation	5 nad[x] + 5 coa[x] + o2[x] + 5 h2o[x] + strdnccoa[x] -> 5 h[x] + 5 nadh[x] + 5 accoa[x] + occoa[x] + h2o2[x]	1962.1 30.1 3295.1 51.1 51.2	Beta oxidation of long chain fatty acid
FAOXC2252053m	-1.29653	Fatty acid oxidation	o2[m] + h2o[m] + coa[m] + nad[m] + dcsptn1coa[m] -> h[m] + nadh[m] + accoa[m] + h2o2[m] + tmndnccoa[m]	34.1 35.1	Beta oxidation of long chain fatty acid
FAOXC2051843m	-1.29653	Fatty acid oxidation	h2o[m] + coa[m] + nad[m] + tmndnccoa[m] -> h[m] + nadh[m] + accoa[m] + strdnccoa[m]	34.1 35.1	Beta oxidation of fatty acid
FAOXC18280m	-1.25141	Fatty acid oxidation	5 h2o[m] + 5 coa[m] + 5 nad[m] + 3 fad[m] + lneldccoa[m] -> 5 h[m] + 5 nadh[m] + 5 accoa[m] + 3 fadh2[m] + occoa[m]	34.1 35.1	Beta oxidation of fatty acid
LNELDCCPT2	-1.25141	Fatty acid oxidation	coa[m] + lneldccrn[m] -> crn[m] + lneldccoa[m]	1376.1	carnitine transferase
LNELDCCRNt	-1.25141	Fatty acid oxidation	lneldccrn[c] -> lneldccrn[m]	788.1	transport into the mitochondria (carnitine)
LNELDCCPT1	-1.25141	Fatty acid oxidation	crn[c] + lneldccoa[c] -> coa[c] + lneldccrn[c]	126129.1 1374.1 1375.1 1375.2 1375.3 1375.4	carnitine O-palmitoyltransferase
FACOAL224	-1.19911	Fatty acid oxidation	atp[c] + coa[c] + adrn[c] -> amp[c] + ppi[c] + adrncoa[c]	2180.1	fatty-acid--CoA ligase
r1400	-1.17785	Fatty acid oxidation	ppcoa[c] + crn[m] -> ppcoa[m] + crn[c]		Active transport
FACOAL160i	-1.17447	Fatty acid oxidation	atp[c] + coa[c] + hdca[c] -> amp[c] + ppi[c] + pmtcoa[c]	2180.1 2181.1 2181.2 22305.1 22305.2 51703.1	C160 fatty acid activation
FACOAL184	-1.06065	Fatty acid oxidation	atp[c] + coa[c] + strdnc[c] -> amp[c] + ppi[c] + strdnccoa[c]	2180.1	fatty-acid--CoA ligase
PCRNtc	-1.06061	Fatty acid oxidation	pcrn[x] -> pcrn[c]		transport into the cytosol from peroxisome (carnitine)
DESAT22_1p	-1.61727	Fatty acid synthesis	h[x] + nadh[x] + o2[x] + adrncoa[x] -> nad[x] + 2 h2o[x] + dcsptn1coa[x]		fatty acyl-CoA desaturase (n-C22:4CoA -> n-C22:5CoA)
DESAT18_10	-1.29419	Fatty acid synthesis	o2[c] + h[c] + nadh[c] + lnlncacoa[c] -> 2 h2o[c] + nad[c] + strdnccoa[c]	9415.1	fatty acyl-CoA desaturase (n-C18:2CoA -> n-C18:3CoA)
GLUDym	-1.20049	Glutamate metabolism	h2o[m] + nadp[m] + glu_L[m] <=> h[m] + nadph[m] + akg[m] + nh4[m]	2746.1 2747.1	glutamate dehydrogenase (NADP), mitochondrial
GTHO	-1.15266	Glutamate metabolism	h[c] + nadph[c] + gthox[c] -> nadp[c] + 2 gthrd[c]	2936.1	glutathione oxidoreductase
PLA2_2	-2.35361	Glycerophospholipid metabolism	h2o[c] + pchol_hs[c] -> h[c] + Rtotal2[c] + lpchol_hs[c]	5320.1 8398.1 8398.2	phospholipase A2
RE3301C	-1.54867	Glycerophospholipid metabolism	h2o[c] + ps_hs[c] <=> h[c] + pa_hs[c] + ser_L[c]	5338.1	RE3301
PCHOLP_hs	-1.54748	Glycerophospholipid metabolism	h2o[c] + pchol_hs[c] -> h[c] + pa_hs[c] + chol[c]	5338.1	choline phosphatase
PSSA1_hs	-1.54573	Glycerophospholipid metabolism	ser_L[c] + pchol_hs[c] <=> chol[c] + ps_hs[c]	9791.1	Phosphatidylserine synthase homo sapiens
HEX1	-2.31763	Glycolysis/gluconeogenesis	atp[c] + 2 h[c] + glc_D[c] -> adp[c] + g6p[c]	2645.1 2645.2 2645.3 3098.1 3098.2 3098.3 3098.4 3098.5 3099.1 3101.1 80201.1	hexokinase (D-glucose:ATP)
PI3P4K	-40.2997	Inositol phosphate metabolism	atp[c] + 2 h[c] + pail3p_hs[c] -> adp[c] + pail34p_hs[c]	23396.1 5297.1 5298.1 55361.1 8394.1 8395.1	phosphatidylinositol 3-phosphate 4-kinase
PI4P3K	-38.1455	Inositol phosphate metabolism	atp[c] + 2 h[c] + pail4p_hs[c] -> adp[c] + pail34p_hs[c]	10870.1 23533.1 5286.1 5287.1 5288.1 5290.1 5291.1 5293.1 5294.1 5295.1 5295.2 5295.3 5296.1 8503.1	phosphatidylinositol 4-phosphate 3-kinase
PI45P3K	-37.9653	Inositol phosphate metabolism	atp[c] + 2 h[c] + pail45p_hs[c] -> adp[c] + pail345p_hs[c]	10870.1 23533.1 5290.1 5291.1 5293.1 5294.1 5295.1 5295.2 5295.3 5296.1 8503.1	phosphatidylinositol 4,5-bisphosphate 3-kinase
PI45P3Kn	-1.5224	Inositol phosphate metabolism	atp[n] + pail45p_hs[n] -> h[n] + adp[n] + pail345p_hs[n]		phosphatidylinositol 4,5-bisphosphate 3-kinase, nuclear
PI4PLC	-1.37327	Inositol phosphate metabolism	h2o[c] + pail4p_hs[c] -> h[c] + dag_hs[c] + mi14p[c]	113026.1 23007.1 23236.1 23236.2 257068.1 51196.1 5330.1 5331.1 5332.1 5332.2 5333.1 5334.1 5335.1 5335.2 5336.1 84812.1 89869.1 9651.1	phosphatidylinositol 4-phosphate phospholipase C
PI3P3Pn	-1.35439	Inositol phosphate metabolism	h2o[n] + pail3p_hs[n] -> pail_hs[n] + pi[n]		phosphatidylinositol-3-phosphate 3-phosphatase, nuclear
PI34P5K	-1.13994	Inositol phosphate metabolism	atp[c] + 2 h[c] + pail34p_hs[c] -> adp[c] + pail345p_hs[c]	23396.1 8394.1 8395.1	phosphatidylinositol 3,4-bisphosphate 5-kinase
r0584	-1.04633	NAD metabolism	h2o[c] + dnad[c] <=> 2 h[c] + amp[c] + nicrnt[c]	218.1 220.1 221.1 222.1 U37519.1	Deamino-NAD+ nucleotidohydrolase Nicotinate and nicotinamide metabolism EC:3.6.1.9
NDPK2n	-4.92517	Nucleotide interconversion	atp[n] + udp[n] <=> utp[n] + adp[n]	4830.1 4830.2 4831.1	nucleoside-diphosphate kinase (ATP:UDP), nuclear
DCK2n	-4.24194	Nucleotide interconversion	utp[n] + dcyt[n] <=> h[n] + dcmp[n] + udp[n]	1633.1	Deoxycytidine kinase, nuclear (UTP)
DCK1n	-4.24194	Nucleotide interconversion	atp[n] + dcyt[n] <=> h[n] + dcmp[n] + adp[n]	1633.1	Deoxycytidine kinase, nuclear (ATP)
UMPK3n	-3.73287	Nucleotide interconversion	utp[n] + ump[n] <=> 2 udp[n]	51727.1	UMP kinase (UTP),nuclear
CYTK12n	-3.19159	Nucleotide interconversion	dcmp[n] + dctp[n] <=> 2 dcdp[n]	51727.1	cytidylate kinase (dCMP,dCTP),nuclear
NDPK5n	-2.28368	Nucleotide interconversion	atp[n] + dgdp[n] <=> dgtp[n] + adp[n]	4830.1 4830.2 4831.1	nucleoside-diphosphate kinase (ATP:dGDP), nuclear
NDPK1	-2.03447	Nucleotide interconversion	atp[c] + 3 h[c] + gdp[c] <=> adp[c] + gtp[c]	10201.1 29922.1 29922.2 4830.1 4830.2 4831.1 4832.1	nucleoside-diphosphate kinase (ATP:GDP)
NDPK7	-1.97033	Nucleotide interconversion	atp[c] + 3 h[c] + dcdp[c] <=> adp[c] + dctp[c]	10201.1 29922.1 29922.2 4830.1 4830.2 4831.1 4832.1	nucleoside-diphosphate kinase (ATP:dCDP)
NTP3e	-1.61662	Nucleotide interconversion	h2o[e] + gtp[e] -> h[e] + pi[e] + gdp[e]	124583	nucleoside-triphosphatase (GTP)
NTD9e	-1.57262	Nucleotide interconversion	h2o[e] + gmp[e] -> pi[e] + gsn[e]	4907.1	5'-nucleotidase (GMP), extracellular
CYTK4	-1.45442	Nucleotide interconversion	gtp[c] + dcmp[c] <=> gdp[c] + dcdp[c]	26289.1 26289.2	cytidylate kinase (dCMP)(GTP)
NDPK9n	-1.30932	Nucleotide interconversion	atp[n] + idp[n] <=> adp[n] + itp[n]	4830.1 4830.2 4831.1	nucleoside-diphosphate kinase (ATP:IDP), nuclear
NDPK8	-1.27734	Nucleotide interconversion	atp[c] + 3 h[c] + dadp[c] <=> adp[c] + datp[c]	10201.1 29922.1 29922.2 4830.1 4830.2 4831.1 4832.1	Nucleoside-diphosphate kinase (ATP:dADP)
NDPK9	-1.24179	Nucleotide interconversion	atp[c] + 3 h[c] + idp[c] <=> adp[c] + itp[c]	10201.1 29922.1 29922.2 4830.1 4830.2 4831.1 4832.1	nucleoside-diphosphate kinase (ATP:IDP)
NTD7	-1.1508	Nucleotide interconversion	h2o[c] + amp[c] -> pi[c] + adn[c]	22978.1 93034.1 93034.2	5'-nucleotidase (AMP)
NDPK1n	-1.13458	Nucleotide interconversion	atp[n] + gdp[n] <=> adp[n] + gtp[n]	4830.1 4830.2 4831.1	nucleoside-diphosphate kinase (ATP:GDP), nuclear
NDP8ex	-1.05746	Nucleotide interconversion	h2o[e] + utp[e] -> h[e] + pi[e] + udp[e]	124583	nucleoside-diphosphatase (UTP), extracellular
ARABR	-2.64094	Pentose phosphate pathway	h[c] + nadph[c] + arab_L[c] -> nadp[c] + abt[c]	10327.1 10327.2 231.1 8574.1	arabinose reductase
RE2974N	-1.36026	Phosphatidylinositol phosphate metabolism	atp[n] + pail3p_hs[n] <=> h[n] + adp[n] + CE5132[n]		RE2974
RE2973N	-1.36026	Phosphatidylinositol phosphate metabolism	atp[n] + pail5p_hs[n] <=> h[n] + adp[n] + CE5132[n]	5286.1 5287.1 5288.1	RE2973
MCITS	-1.05047	Propanoate metabolism	h2o[c] + ppcoa[c] + oaa[c] -> h[c] + 2mcit[c] + coa[c]		2-methylcitrate synthase
PUNP2	-1.76039	Purine catabolism	pi[c] + dad_2[c] <=> 2dr1p[c] + ade[c]	4860.1	purine-nucleoside phosphorylase (Deoxyadenosine)
CSND	-1.1868	Pyrimidine catabolism	h2o[c] + h[c] + csn[c] -> nh4[c] + ura[c]		Cytosine deaminase
ME1m	-1.73847	Pyruvate metabolism	nad[m] + mal_L[m] -> co2[m] + nadh[m] + pyr[m]	4200.1	malic enzyme (NAD), mitochondrial
SPHMDAc	-1.13968	Sphingolipid metabolism	h2o[c] + sphmyln_hs[c] -> Rtotal[c] + spc_hs[c]		sphingomyelin deacylase
SMS	-1.13964	Sphingolipid metabolism	pchol_hs[c] + crm_hs[c] -> dag_hs[c] + sphmyln_hs[c]	259230	Sphingomyelin synthase (homo sapiens)
DHCRD2	-1.02826	Sphingolipid metabolism	dhcrm_hs[c] + fad[c] -> crm_hs[c] + fadh2[c]	8560.1 8560.2	dihydroceramide desaturase
r0399	-1.88523	Tetrahydrobiopterin metabolism	o2[c] + thbpt[c] + phe_L[c] -> h2o[c] + dhbpt[c] + tyr_L[c]	4967.1 55753.1	L-Phenylalanine,tetrahydrobiopterin:oxygen oxidoreductase (4-hydroxylating) Phenylalanine, tyrosine and tryptophan biosynthesis EC:1.14.16.1
DHPR	-1.65654	Tetrahydrobiopterin metabolism	h[c] + nadh[c] + dhbpt[c] -> nad[c] + thbpt[c]	5860.1	6,7-dihydropteridine reductase
DHPR2	-1.37021	Tetrahydrobiopterin metabolism	5mthf[c] + dhbpt[c] -> h[c] + thbpt[c] + mlthf[c]		6,7-dihydropteridine reduction
FRDPtcr	-2.13108	Transport, endoplasmic reticular	frdp[c] <=> frdp[r]		transport of Farnesyl diphosphate into the endoplasmic reticulum
r2512	-1.04447	Transport, endoplasmic reticular	crn[c] + lnlncg[r] -> crn[r] + lnlncg[c]		Utilized transport
CYSGLUexR	-3.77114	Transport, extracellular	cys_L[e] + gln_L[c] <=> cys_L[c] + gln_L[e]	56301.1 6520.1	L-cysteine/L-glutamine reversible exchanger
ALAGLNexR	-2.98009	Transport, extracellular	ala_L[e] + gln_L[c] <=> ala_L[c] + gln_L[e]	56301.1 6520.1	L-alanine/glutamine reversible exchange
ALADGLNexR	-2.96613	Transport, extracellular	ala_D[e] + gln_L[c] <=> ala_D[c] + gln_L[e]	56301.1 6520.1	L-alanine/glutamine reversible exchange
ALADGLYexR	-2.95956	Transport, extracellular	ala_D[e] + gly[c] <=> ala_D[c] + gly[e]	56301.1 6520.1	D-alanine/glycine reversible exchange
r1897	-2.79324	Transport, extracellular	na1[e] + gly[c] + ile_L[e] -> na1[c] + gly[e] + ile_L[c]	9057.1	Y+LAT2 Utilized transport
ARAB_Lt	-2.64094	Transport, extracellular	arab_L[e] <=> arab_L[c]		L-arabinoase extracellular transport
r1685	-2.45404	Transport, extracellular	na1[e] + gly[e] + hom_L[c] -> na1[c] + gly[c] + hom_L[e]	8140.1	Y+LAT2 Utilized transport
PSt3	-2.41989	Transport, extracellular	ps_hs[e] <=> ps_hs[c]		phosphatidylserine transport
r1884	-2.35427	Transport, extracellular	na1[e] + gln_L[c] + hom_L[e] -> na1[c] + gln_L[e] + hom_L[c]	9057.1	Y+LAT2 Utilized transport
BHBt	-2.32935	Transport, extracellular	h[e] + bhb[e] <=> h[c] + bhb[c]		(R)-3-Hydroxybutanoate transport via H+ symport
VALtec	-2.28494	Transport, extracellular	val_L[e] <=> val_L[c]	124935.1 8501.1	L-valine transport via diffusion (extracellular to cytosol)
r1758	-2.17068	Transport, extracellular	na1[e] + trp_L[e] + val_L[c] -> na1[c] + val_L[e] + trp_L[c]	8140.1	Y+LAT2 Utilized transport
r1741	-2.15476	Transport, extracellular	na1[e] + met_L[e] + pro_L[c] -> na1[c] + met_L[c] + pro_L[e]	8140.1	Y+LAT2 Utilized transport
r1961	-2.14922	Transport, extracellular	na1[e] + citr_L[c] + leu_L[e] -> na1[c] + leu_L[c] + citr_L[e]	9057.1	Y+LAT2 Utilized transport
r2023	-1.88847	Transport, extracellular	arg_L[e] + ile_L[c] -> arg_L[c] + ile_L[e]	9057.1	Amino Acid-Polyamine-Organocation (APC) TCDB:2.A.3.8.15
r1813	-1.88272	Transport, extracellular	na1[e] + leu_L[e] + phe_L[c] -> na1[c] + phe_L[e] + leu_L[c]	9057.1	Y+LAT2 Utilized transport
r1828	-1.88	Transport, extracellular	na1[e] + pro_L[e] + phe_L[c] -> na1[c] + phe_L[e] + pro_L[c]	9057.1	Y+LAT2 Utilized transport
r1788	-1.84792	Transport, extracellular	na1[e] + tyr_L[e] + val_L[c] -> na1[c] + val_L[e] + tyr_L[c]	9057.1	Y+LAT2 Utilized transport
r1798	-1.8413	Transport, extracellular	na1[e] + cys_L[e] + phe_L[c] -> na1[c] + cys_L[c] + phe_L[e]	9057.1	Y+LAT2 Utilized transport
THRGLYexR	-1.83589	Transport, extracellular	gly[c] + thr_L[e] <=> gly[e] + thr_L[c]	56301.1 6520.1	L-threonine/glycine reversible exchange
r1759	-1.79914	Transport, extracellular	na1[e] + thr_L[c] + trp_L[e] -> na1[c] + thr_L[e] + trp_L[c]	8140.1	Y+LAT2 Utilized transport
r1858	-1.73241	Transport, extracellular	na1[e] + val_L[e] + phe_L[c] -> na1[c] + phe_L[e] + val_L[c]	9057.1	Y+LAT2 Utilized transport
RIBt	-1.68109	Transport, extracellular	rib_D[e] <=> rib_D[c]		ribose transport via diffusion
RIBt2	-1.68109	Transport, extracellular	h[e] + rib_D[e] -> h[c] + rib_D[c]		ribose transport in via proton symporter
r1754	-1.66292	Transport, extracellular	na1[e] + cys_L[c] + trp_L[e] -> na1[c] + cys_L[e] + trp_L[c]	8140.1	Y+LAT2 Utilized transport
r1991	-1.65515	Transport, extracellular	na1[e] + citr_L[c] + ile_L[e] -> na1[c] + ile_L[c] + citr_L[e]	9057.1	Y+LAT2 Utilized transport
VACCt	-1.65079	Transport, extracellular	vacc[e] <=> vacc[c]		fatty acid transport via diffusion
r1806	-1.60834	Transport, extracellular	na1[e] + cys_L[e] + ile_L[c] -> na1[c] + cys_L[c] + ile_L[e]	9057.1	Y+LAT2 Utilized transport
r1768	-1.59586	Transport, extracellular	na1[e] + phe_L[e] + tyr_L[c] -> na1[c] + tyr_L[e] + phe_L[c]	9057.1	Y+LAT2 Utilized transport
r2042	-1.59314	Transport, extracellular	gln_L[c] + his_L[e] -> gln_L[e] + his_L[c]	9057.1	Amino Acid-Polyamine-Organocation (APC) TCDB:2.A.3.8.15
r2008	-1.58021	Transport, extracellular	gly[c] + arg_L[e] -> gly[e] + arg_L[c]	9057.1	Amino Acid-Polyamine-Organocation (APC) TCDB:2.A.3.8.15
r1995	-1.58002	Transport, extracellular	ser_L[c] + lys_L[e] -> ser_L[e] + lys_L[c]	9057.1	Amino Acid-Polyamine-Organocation (APC) TCDB:2.A.3.8.15
r1816	-1.55002	Transport, extracellular	na1[e] + leu_L[e] + pro_L[c] -> na1[c] + pro_L[e] + leu_L[c]	9057.1	Y+LAT2 Utilized transport
r1846	-1.54456	Transport, extracellular	na1[e] + asn_L[e] + leu_L[c] -> na1[c] + asn_L[c] + leu_L[e]	9057.1	Y+LAT2 Utilized transport
r1871	-1.53558	Transport, extracellular	na1[e] + thr_L[e] + met_L[c] -> na1[c] + thr_L[c] + met_L[e]	9057.1	Y+LAT2 Utilized transport
r1691	-1.50956	Transport, extracellular	na1[e] + ala_L[e] + trp_L[c] -> na1[c] + ala_L[c] + trp_L[e]	8140.1	Y+LAT2 Utilized transport
r1833	-1.50804	Transport, extracellular	na1[e] + pro_L[e] + val_L[c] -> na1[c] + val_L[e] + pro_L[c]	9057.1	Y+LAT2 Utilized transport
r1778	-1.50114	Transport, extracellular	na1[e] + ala_L[c] + tyr_L[e] -> na1[c] + ala_L[e] + tyr_L[c]	9057.1	Y+LAT2 Utilized transport
25HVITD3t	-1.46786	Transport, extracellular	25hvitd3[c] -> 25hvitd3[e]		25-hydroxyvitamin D3 transport from cytoplasm
25HVITD3tin	-1.46684	Transport, extracellular	25hvitd3[e] -> 25hvitd3[c]		25-hydroxyvitamin D3 transport in cytoplasm
LEUKTRA4t	-1.43416	Transport, extracellular	leuktrA4[e] <=> leuktrA4[c]		leukotriene A4 transport
RETFAt1	-1.43212	Transport, extracellular	9_cis_retfa[c] -> 9_cis_retfa[e]		fatty acid retinol efflux (9-cis)
r1752	-1.38986	Transport, extracellular	na1[e] + trp_L[e] + phe_L[c] -> na1[c] + phe_L[e] + trp_L[c]	8140.1	Y+LAT2 Utilized transport
r1900	-1.38116	Transport, extracellular	na1[e] + ser_L[c] + ile_L[e] -> na1[c] + ser_L[e] + ile_L[c]	9057.1	Y+LAT2 Utilized transport
DCSPTN1t	-1.37664	Transport, extracellular	dcsptn1[e] <=> dcsptn1[c]		fatty acid transport via diffusion
ARGtiDF	-1.37514	Transport, extracellular	arg_L[e] -> arg_L[c]	55089.1 6541.1 6542.1 84889.1	L-arginine transport via diffusion (extracellular to cytosol)
CYSTHRNaEx	-1.3415	Transport, extracellular	na1[e] + cys_L[e] + thr_L[c] -> na1[c] + cys_L[c] + thr_L[e]	6509.1 6510.1	L-cysteine/L-threonine Na-dependent exchange (Cys-L in)
r2005	-1.33119	Transport, extracellular	thr_L[c] + lys_L[e] -> thr_L[e] + lys_L[c]	9057.1	Amino Acid-Polyamine-Organocation (APC) TCDB:2.A.3.8.15
CYSt4	-1.32695	Transport, extracellular	na1[e] + cys_L[e] -> na1[c] + cys_L[c]	11254.1	L-cysteine reversible transport via sodium symport
r1930	-1.32624	Transport, extracellular	na1[e] + ser_L[e] + his_L[c] -> na1[c] + ser_L[c] + his_L[e]	9057.1	Y+LAT2 Utilized transport
PEt	-1.30127	Transport, extracellular	pe_hs[e] <=> pe_hs[c]		phosphatidylethanolamine transport
r2063	-1.28577	Transport, extracellular	tyr_L[c] + citr_L[e] -> citr_L[c] + tyr_L[e]	9057.1	Amino Acid-Polyamine-Organocation (APC) TCDB:2.A.3.8.15
r2000	-1.28507	Transport, extracellular	cys_L[c] + lys_L[e] -> cys_L[e] + lys_L[c]	9057.1	Amino Acid-Polyamine-Organocation (APC) TCDB:2.A.3.8.15
r1985	-1.2419	Transport, extracellular	na1[e] + hom_L[e] + his_L[c] -> na1[c] + his_L[e] + hom_L[c]	9057.1	Y+LAT2 Utilized transport
CYSSERNaEx	-1.22966	Transport, extracellular	na1[e] + cys_L[e] + ser_L[c] -> na1[c] + cys_L[c] + ser_L[e]	6509.1 6510.1	L-serine/L-cysteine Na-dependent exchange (Cys-L in)
r1841	-1.2243	Transport, extracellular	na1[e] + asn_L[e] + met_L[c] -> na1[c] + asn_L[c] + met_L[e]	9057.1	Y+LAT2 Utilized transport
ALAASNNaEx	-1.22376	Transport, extracellular	na1[e] + ala_L[e] + asn_L[c] -> na1[c] + ala_L[c] + asn_L[e]	6510.1	L-alanine/L-asparagine Na-dependent exchange (Ala-L in)
r1817	-1.21739	Transport, extracellular	na1[e] + asn_L[c] + leu_L[e] -> na1[c] + asn_L[e] + leu_L[c]	9057.1	Y+LAT2 Utilized transport
DHAAt1r	-1.19589	Transport, extracellular	dhdascb[e] <=> dhdascb[c]	6513.1 6515.1 6517.1	dehydroascorbate transport (uniport)
CSNt	-1.1868	Transport, extracellular	csn[e] <=> csn[c]	3177.1	cytosine transport via facilated diffusion
r1907	-1.18205	Transport, extracellular	na1[e] + ile_L[e] + pro_L[c] -> na1[c] + pro_L[e] + ile_L[c]	9057.1	Y+LAT2 Utilized transport
CYSALANaEx	-1.17093	Transport, extracellular	na1[e] + ala_L[c] + cys_L[e] -> na1[c] + ala_L[e] + cys_L[c]	6509.1 6510.1	L-alanine/L-cysteine Na-dependent exchange (Cys-L in)
r1966	-1.14308	Transport, extracellular	na1[e] + citr_L[c] + pro_L[e] -> na1[c] + pro_L[c] + citr_L[e]	9057.1	Y+LAT2 Utilized transport
r1982	-1.1414	Transport, extracellular	na1[e] + lys_L[c] + hom_L[e] -> na1[c] + lys_L[e] + hom_L[c]	9057.1	Y+LAT2 Utilized transport
SPC_HSt	-1.13968	Transport, extracellular	spc_hs[c] <=> spc_hs[e]		sphingosylphosphorylcholine transport (diffusion)
r1973	-1.11757	Transport, extracellular	na1[e] + arg_L[c] + val_L[e] -> na1[c] + arg_L[e] + val_L[c]	9057.1	Y+LAT2 Utilized transport
r1763	-1.11744	Transport, extracellular	na1[e] + ala_L[c] + phe_L[e] -> na1[c] + ala_L[e] + phe_L[c]	9057.1	Y+LAT2 Utilized transport
r1958	-1.11742	Transport, extracellular	na1[e] + arg_L[c] + leu_L[e] -> na1[c] + arg_L[e] + leu_L[c]	9057.1	Y+LAT2 Utilized transport
r1725	-1.10627	Transport, extracellular	na1[e] + ser_L[e] + leu_L[c] -> na1[c] + ser_L[c] + leu_L[e]	8140.1	Y+LAT2 Utilized transport
r1873	-1.0961	Transport, extracellular	na1[e] + thr_L[e] + phe_L[c] -> na1[c] + thr_L[c] + phe_L[e]	9057.1	Y+LAT2 Utilized transport
r1734	-1.0591	Transport, extracellular	na1[e] + gln_L[c] + met_L[e] -> na1[c] + gln_L[e] + met_L[c]	8140.1	Y+LAT2 Utilized transport
r1954	-1.056	Transport, extracellular	na1[e] + orn[c] + cys_L[e] -> na1[c] + cys_L[c] + orn[e]	9057.1	Y+LAT2 Utilized transport
2MCITt	-1.05047	Transport, extracellular	2mcit[c] <=> 2mcit[e]		2-methylcitrate transport via diffusion
r1702	-1.03648	Transport, extracellular	na1[e] + gln_L[e] + gly[c] -> na1[c] + gln_L[c] + gly[e]	8140.1	Y+LAT2 Utilized transport
CYStec	-1.03527	Transport, extracellular	cys_L[e] <=> cys_L[c]	124935	L-cysteine transport via diffusion (extracellular to cytosol)
r1857	-1.02795	Transport, extracellular	na1[e] + val_L[e] + trp_L[c] -> na1[c] + trp_L[e] + val_L[c]	9057.1	Y+LAT2 Utilized transport
ORNtiDF	-1.01817	Transport, extracellular	orn[e] -> orn[c]	6541.1 6542.1 84889.1	ornithine transport via diffusion (extracellular to cytosol)
LEUKTRE4t	-1.01736	Transport, extracellular	leuktrE4[e] <=> leuktrE4[c]		leukotriene E4 transport
r1843	-1.00559	Transport, extracellular	na1[e] + asn_L[e] + phe_L[c] -> na1[c] + asn_L[c] + phe_L[e]	9057.1	Y+LAT2 Utilized transport
BHBtm	-2.32935	Transport, mitochondrial	h[c] + bhb[c] <=> h[m] + bhb[m]		(R)-3-Hydroxybutanoate mitochondrial transport via H+ symport
DNDPt17m	-2.07041	Transport, mitochondrial	dudp[c] + dcdp[m] -> dcdp[c] + dudp[m]	60386.1	dUDP transport via dCDP antiport
DNDPt9m	-1.93079	Transport, mitochondrial	dadp[c] + dtdp[m] -> dadp[m] + dtdp[c]	60386.1	dADP transport via dTDP antiport
FUMSO4tm	-1.74889	Transport, mitochondrial	fum[c] + so4[m] <=> fum[m] + so4[c]	1468.1	Fumarate:sulfate antiport, mitochondrial
MALSO4tm	-1.7481	Transport, mitochondrial	mal_L[c] + so4[m] <=> mal_L[m] + so4[c]	1468.1	Malate:sulfate antiport, mitochondrial
DNDPt60m	-1.54076	Transport, mitochondrial	dgtp[c] + dudp[m] -> dgtp[m] + dudp[c]	60386.1	dGTP transport via dUDP antiport
ORNt4m	-1.44484	Transport, mitochondrial	h[c] + orn[m] + citr_L[c] <=> h[m] + orn[c] + citr_L[m]	10166.1 83884.1	ornithine mitochondrial transport exchange with citruline
ORNt3m	-1.44215	Transport, mitochondrial	h[c] + orn[m] <=> h[m] + orn[c]	10166.1 83884.1	ornithine mitochondrial transport via proton antiport
DNDPt29m	-1.43817	Transport, mitochondrial	dcdp[c] + dadp[m] -> dadp[c] + dcdp[m]	60386.1	dCDP transport via dADP antiport
DNDPt41m	-1.42387	Transport, mitochondrial	dutp[c] + dcdp[m] -> dcdp[c] + dutp[m]	60386.1	dUTP transport via dCDP antiport
DNDPt27m	-1.22934	Transport, mitochondrial	dcdp[c] + dtdp[m] -> dtdp[c] + dcdp[m]	60386.1	dCDP transport via dTDP antiport
GLU5SAtmc	-1.19794	Transport, mitochondrial	glu5sa[m] <=> glu5sa[c]		glutamate semi-aldehyde transport, mitochondrial
r2409	-1.18251	Transport, mitochondrial	h[c] + citr_L[c] + his_L[m] -> h[m] + citr_L[m] + his_L[c]		Mitochondrial Carrier (MC) TCDB:2.A.29.19.1
r2405	-1.1517	Transport, mitochondrial	h[c] + orn[m] + his_L[c] -> h[m] + orn[c] + his_L[m]		Mitochondrial Carrier (MC) TCDB:2.A.29.19.1
PE_HStm	-1.14416	Transport, mitochondrial	pe_hs[c] <=> pe_hs[m]		phosphatidylethanolamine scramblase
DNDPt37m	-1.14068	Transport, mitochondrial	dtdp[m] + dutp[c] -> dtdp[c] + dutp[m]	60386.1	dUTP transport via dTDP antiport
r2398	-1.11023	Transport, mitochondrial	h[c] + lys_L[m] + citr_L[c] -> h[m] + lys_L[c] + citr_L[m]		Mitochondrial Carrier (MC) TCDB:2.A.29.19.1
LYStm	-1.09791	Transport, mitochondrial	h[m] + lys_L[c] <=> h[c] + lys_L[m]	10166.1 83884.1	Lysine mitochondrial transport via ornithine carrier
r2413	-1.05995	Transport, mitochondrial	h[c] + citr_L[m] + his_L[c] -> h[m] + citr_L[c] + his_L[m]		Mitochondrial Carrier (MC) TCDB:2.A.29.19.1
DNDPt11m	-1.0379	Transport, mitochondrial	dadp[c] + dgdp[m] -> dgdp[c] + dadp[m]	60386.1	dADP transport via dGDP antiport
r1459	-3.32414	Transport, nuclear	ppi[c] <=> ppi[n]		Transport reaction
PAIL4P_HStn	-1.77049	Transport, nuclear	pail4p_hs[c] <=> pail4p_hs[n]		phosphatidylinositol 4-phosphate nuclear transport (diffusion)
IDPtn	-1.30932	Transport, nuclear	idp[c] <=> idp[n]		IDP nuclear transport
ITPtn	-1.30932	Transport, nuclear	itp[c] <=> itp[n]		ITP nuclear transport
CRNtx	-3.51786	Transport, peroxisomal	dmnoncrn[x] <=> dmnoncrn[m]		carnitine transport peroxisome to mitochondria
STCOAtx	-2.96862	Transport, peroxisomal	stcoa[c] <=> stcoa[x]		fatty acid intracellular transport
FRDPtr	-2.13108	Transport, peroxisomal	frdp[x] <=> frdp[r]		lipid, flip-flop intracellular transport
FRDPtc	-2.13108	Transport, peroxisomal	frdp[x] <=> frdp[c]		lipid, flip-flop intracellular transport
PMTCOAtx	-1.93618	Transport, peroxisomal	pmtcoa[c] <=> pmtcoa[x]		fatty acid intracellular transport
ADRNCOAtx	-1.13032	Transport, peroxisomal	adrncoa[c] <=> adrncoa[x]		fatty acid intracellular transport
CRNrtx	-1.07246	Transport, peroxisomal	crn[c] <=> crn[x]		reversible transport of L-Carnitine in peroxisome
H2O2tp	-1.0562	Transport, peroxisomal	h2o2[c] <=> h2o2[x]		hydrogen peroxide peroxisomal transport via diffusion
G5SADs	-1.19794	Urea cycle	glu5sa[c] -> h2o[c] + h[c] + 1pyr5c[c]		L-glutamate 5-semialdehyde dehydratase (spontaneous)
MMMm	-2.76562	Valine, leucine, and isoleucine metabolism	mmcoa_R[m] <=> succoa[m]	4594.1	methylmalonyl-CoA mutase
MMEm	-1.54961	Valine, leucine, and isoleucine metabolism	mmcoa_R[m] <=> mmcoa_S[m]	84693.1	methylmalonyl-CoA epimerase/racemase
MMCDm	-1.54961	Valine, leucine, and isoleucine metabolism	h[m] + mmcoa_S[m] -> co2[m] + ppcoa[m]	23417.1	Methylmalonyl-CoA decarboxylase, mitochondrial
ACOAD10m	-1.11944	Valine, leucine, and isoleucine metabolism	2mbcoa[m] + fad[m] -> 2mb2coa[m] + fadh2[m]	34.1 36.1	acyl-CoA dehydrogenase (2-methylbutanoyl-CoA), mitochondrial
MMSAD1m	-1.107	Valine, leucine, and isoleucine metabolism	coa[m] + nad[m] + 2mop[m] -> co2[m] + nadh[m] + ppcoa[m]	4329.1	methylmalonate-semialdehyde dehydrogenase
r0561	-1.0849	Valine, leucine, and isoleucine metabolism	coa[m] + 2mpdhl[m] -> ibcoa[m] + dhlam[m]	6576.1	2-methylpropanoyl-CoA:enzyme N6-(dihydrolipoyl)lysine S-(2-methylpropanoyl)transferase Valine, leucine and isoleucine degradation EC:2.3.1.168
RE3326M	-1.0849	Valine, leucine, and isoleucine metabolism	ibcoa[m] + dhlam[m] <=> coa[m] + 2mpdhl[m]	594.1	RE3326
RE3050R	-4.09942	Vitamin A metabolism	h2o[r] + nad[r] + retinal_cis_13[r] <=> 2 h[r] + nadh[r] + retn[r]		RE3050
RETH2e	-2.06243	Vitamin A metabolism	h2o[e] + 11_cis_retfa[e] -> h[e] + retinol_cis_11[e] + Rtotal2[e]		retinyl ester hydrolase (11-cis), extracellular
LRAT2	-1.26182	Vitamin A metabolism	pchol_hs[c] + retinol_9_cis[c] -> lpchol_hs[c] + 9_cis_retfa[c]		Lecithin retinol acyltransferase (9-cis)
DASCBR	-1.20307	Vitamin C metabolism	nadph[c] + dhdascb[c] -> nadp[c] + ascb_L[c]	2745.1 51022.1 51022.2	dehydroascorbate reductase
GTHDH	-1.18313	Vitamin C metabolism	dhdascb[c] + 2 gthrd[c] -> h[c] + ascb_L[c] + gthox[c]		Glutathione dehydrogenase (dehydroascorbate reductase)

## Sheet: ch
Rxn name	control	pten_del	Subsystem	Formula	Genes	Rxn description
NDPK4	n	p	Nucleotide interconversion	atp[c] + 3 h[c] + dtdp[c] <=> adp[c] + dttp[c]	10201.1 29922.1 29922.2 4830.1 4830.2 4831.1 4832.1	nucleoside-diphosphate kinase (ATP:dTDP)
CYTK14n	n	p	Nucleotide interconversion	dcmp[n] + utp[n] <=> udp[n] + dcdp[n]	51727.1	cytidylate kinase (dCMP,CTP),nuclear
CHSTEROLt2	n	p	Transport, mitochondrial	chsterol[r] <=> chsterol[m]		cholesterol intracellular transport
DTTPtn	n	p	Transport, nuclear	dttp[c] <=> dttp[n]		dTTP diffusion in nucleus
NDPK2	n	p	Nucleotide interconversion	atp[c] + 3 h[c] + udp[c] <=> adp[c] + utp[c]	10201.1 29922.1 29922.2 4830.1 4830.2 4831.1 4832.1	nucleoside-diphosphate kinase (ATP:UDP)
CYTK10	n	p	Nucleotide interconversion	cmp[c] + dgtp[c] <=> cdp[c] + dgdp[c]	51727.1	cytidylate kinase (CMP,dGTP)
NDPK10n	n	p	Nucleotide interconversion	atp[n] + didp[n] <=> adp[n] + ditp[n]	4830.1 4830.2 4831.1	nucleoside-diphosphate kinase (ATP:dIDP), nuclear
DIDPtn	n	p	Transport, nuclear	didp[c] <=> didp[n]		dIDP nuclear transport
GLCt1r	n	p	Transport, extracellular	glc_D[e] <=> glc_D[c]	11182.1 144195.1 154091.1 155184.1 29988.1 56606.1 56606.2 6513.1 6514.1 6515.1 6517.1 66035.1 81031.1	glucose transport (uniport)
MALSO3tm	n	p	Transport, mitochondrial	so3[m] + mal_L[c] <=> so3[c] + mal_L[m]	1468.1	Malate:sulfite antiport, mitochondrial
CYTK10n	n	p	Nucleotide interconversion	dgtp[n] + cmp[n] <=> cdp[n] + dgdp[n]	51727.1	cytidylate kinase (CMP,dGTP),nuclear
CYTK3n	n	p	Nucleotide interconversion	ctp[n] + dcmp[n] <=> cdp[n] + dcdp[n]	51727.1	cytidylate kinase (dCMP,CTP),nuclear
CYTK9n	n	p	Nucleotide interconversion	dctp[n] + cmp[n] <=> cdp[n] + dcdp[n]	51727.1	cytidylate kinase (CMP,dCTP),nuclear
UMPK5n	n	p	Nucleotide interconversion	datp[n] + ump[n] <=> dadp[n] + udp[n]	51727.1	UMP kinase (dATP),nuclear
UGLT	n	p	Galactose metabolism	gal1p[c] + udpg[c] <=> udpgal[c] + g1p[c]	2592.1 2592.2 2592.3	UDPglucose--hexose-1-phosphate uridylyltransferase
GALU	n	p	Galactose metabolism	h[c] + g1p[c] + utp[c] <=> ppi[c] + udpg[c]	7359.1 7360.1 7360.2	UTP-glucose-1-phosphate uridylyltransferase
AHCYStd	n	p	Transport, mitochondrial	ahcys[m] <=> ahcys[c]		diffusion of S-Adenosyl-L-homocysteine
AMETtd	n	p	Transport, mitochondrial	amet[c] <=> amet[m]		diffusion of S-Adenosyl-L-methionine
r1669	n	p	Transport, extracellular	arg_L[e] + citr_L[c] <=> arg_L[c] + citr_L[e]	8140.1	Y+LAT2 Utilized transport
RE1709N	n	p	Tetrahydrobiopterin metabolism	thbpt4acam[n] <=> h2o[n] + CE5236[n]	5092.1 84105.1	RE1709
RE2660N	n	p	Tetrahydrobiopterin metabolism	CE5236[n] <=> CE2705[n]	5092.1 84105.1	RE2660
CYTK5n	n	p	Nucleotide interconversion	cmp[n] + gtp[n] <=> cdp[n] + gdp[n]	51727.1	cytidylate kinase (CMP),nuclear
RE3272N	n	p	Phosphatidylinositol phosphate metabolism	h2o[n] + pail4p_hs[n] <=> pail_hs[n] + pi[n]		RE3272
RETI1	n	p	Vitamin A metabolism	retinol[c] <=> retinol_cis_11[c]		retinol isomerase (11-cis)
RAI2	n	p	Vitamin A metabolism	retinal[c] <=> retinal_cis_9[c]		retinal isomerase (9-cis)
CYTK11n	n	p	Nucleotide interconversion	dgtp[n] + dcmp[n] <=> dgdp[n] + dcdp[n]	51727.1	cytidylate kinase (dCMP,dGTP),nuclear
CYTK12	n	p	Nucleotide interconversion	dcmp[c] + dctp[c] <=> 2 dcdp[c]	51727.1	cytidylate kinase (dCMP,dCTP)
UMPK4	n	p	Nucleotide interconversion	gtp[c] + ump[c] <=> udp[c] + gdp[c]	51727.1	UMP kinase (GTP)
H2Otp	n	p	Transport, peroxisomal	h2o[c] <=> h2o[x]		H2O transport, peroxisomal
EX_leuktrF4(e)	n	p	Exchange/demand reaction	leuktrF4[e] <=>		leukotriene F4 exchange
ADK3m	n	p	Nucleotide interconversion	amp[m] + gtp[m] <=> adp[m] + gdp[m]	50808.1	adentylate kinase (GTP)
EX_Rtotal3(e)	n	p	Exchange/demand reaction	Rtotal3[e] <=>		R total 3 position exchange
EX_11_cis_retfa(e)	n	p	Exchange/demand reaction	11_cis_retfa[e] <=>		fatty acid 11-cis-retinol exchange
TPI	n	p	Glycolysis/gluconeogenesis	dhap[c] <=> g3p[c]	286016.1 7167.1	triose-phosphate isomerase
GALt1r	n	p	Transport, extracellular	gal[e] <=> gal[c]	29988.1 6513.1 6514.1 6515.1 81031.1	galactose transport (uniport)
MECOALm	n	p	C5-branched dibasic acid metabolism	coa[m] + atp[m] + mescon[m] <=> h[m] + adp[m] + pi[m] + mescoa[m]	8802.1 8803.1	mesaconate--CoA ligase (ADP-forming), mitochondrial
DADNt4	n	p	Transport, extracellular	dad_2[e] <=> dad_2[c]		deoxyadenosine transport via diffusion
RTOTAL3t	p	n	Transport, extracellular	Rtotal3[e] <=> Rtotal3[c]		RTOTAL3 transport
EX_tag_hs(e)	p	n	Exchange/demand reaction	tag_hs[e] <=>		triacylglycerol (homo sapiens) exchange
MECOAS1m	p	n	C5-branched dibasic acid metabolism	coa[m] + gtp[m] + mescon[m] <=> pi[m] + gdp[m] + mescoa[m]	8801.1 8802.1	mesaconate--CoA ligase (GDP-forming)
EX_25hvitd3(e)	p	n	Exchange/demand reaction	25hvitd3[e] <=>		25-Hydroxyvitamin D3 exchange
GSNt	p	n	Transport, extracellular	gsn[e] <=> gsn[c]	2030.1 3177.1	guanosine facilated transport in cytosol
ADK1m	p	n	Exchange	atp[m] + amp[m] <=> 2 adp[m]		ADK1m
LEUKTRF4t	p	n	Transport, extracellular	leuktrF4[e] <=> leuktrF4[c]		leukotriene F4 transport
GLUt2m	p	n	Transport, mitochondrial	h[c] + glu_L[c] <=> h[m] + glu_L[m]	10165.1 79751.1 83733.1 8604.1	L-glutamate reversible transport via proton symport, mitochondrial
UMPK2	p	n	Nucleotide interconversion	ctp[c] + ump[c] <=> udp[c] + cdp[c]	51727.1	UMP kinase (CTP)
EX_h(e)	p	n	Exchange/demand reaction	h[e] <=>		exchange reaction for proton
INSt	p	n	Transport, extracellular	ins[e] <=> ins[c]	2030.1 3177.1	Inosine transport (diffusion)
ADNt	p	n	Transport, extracellular	adn[e] <=> adn[c]	2030.1 3177.1	adenosine facilated transport in cytosol
NDPK5	p	n	Nucleotide interconversion	atp[c] + 3 h[c] + dgdp[c] <=> adp[c] + dgtp[c]	10201.1 29922.1 29922.2 4830.1 4830.2 4831.1 4832.1	Nucleoside-diphosphate kinase (ATP:dGDP)
RETI2	p	n	Vitamin A metabolism	retinol[c] <=> retinol_9_cis[c]		retinol isomerase (9-cis)
RAI1	p	n	Vitamin A metabolism	retinal[c] <=> retinal_11_cis[c]		retinal isomerase (11-cis)
CYTK1	p	n	Nucleotide interconversion	atp[c] + 3 h[c] + cmp[c] <=> adp[c] + cdp[c]	51727.1	cytidylate kinase (CMP)
CYTK9	p	n	Nucleotide interconversion	cmp[c] + dctp[c] <=> cdp[c] + dcdp[c]	51727.1	cytidylate kinase (CMP,dCTP)
RE0830N	p	n	Tetrahydrobiopterin metabolism	thbpt4acam[n] <=> h2o[n] + CE2705[n]	5092.1 84105.1	RE0830
NDPK3	p	n	Nucleotide interconversion	atp[c] + 3 h[c] + cdp[c] <=> adp[c] + ctp[c]	10201.1 29922.1 29922.2 4830.1 4830.2 4831.1 4832.1	nucleoside-diphosphate kinase (ATP:CDP)
CYTK11	p	n	Nucleotide interconversion	dgtp[c] + dcmp[c] <=> dgdp[c] + dcdp[c]	51727.1	cytidylate kinase (dCMP,dGTP)
AMETt2m	p	n	Transport, mitochondrial	amet[c] + ahcys[m] <=> ahcys[c] + amet[m]	115286.1 115286.2 115286.3	S-Adenosyl-L-methionine reversible transport, mitochondrial
CYSGLYexR	p	n	Transport, extracellular	cys_L[c] + gly[e] <=> cys_L[e] + gly[c]	23428.1 23428.2 56301.1 6520.1	L-cysteine/glycine reversible exchanger
CYTK4n	p	n	Nucleotide interconversion	dcmp[n] + gtp[n] <=> dcdp[n] + gdp[n]	51727.1	cytidylate kinase (dCMP,GTP),nuclear
THRGLNexR	p	n	Transport, extracellular	gln_L[c] + thr_L[e] <=> gln_L[e] + thr_L[c]	56301.1 6520.1	THRGLNexR
GALT	p	n	Galactose metabolism	h[c] + utp[c] + gal1p[c] <=> udpgal[c] + ppi[c]	2592.1 2592.2 2592.3	galactose-1-phosphate uridylyltransferase
UMPK7	p	n	Nucleotide interconversion	dgtp[c] + ump[c] <=> udp[c] + dgdp[c]	51727.1	UMP kinase (dGTP)
FUMSO3tm	p	n	Transport, mitochondrial	so3[m] + fum[c] <=> so3[c] + fum[m]	1468.1	Fumarate:sulfite antiport, mitochondrial
CYTK6n	p	n	Nucleotide interconversion	ctp[n] + cmp[n] <=> 2 cdp[n]	51727.1	cytidylate kinase (CMP,CTP),nuclear
CYTK13n	p	n	Nucleotide interconversion	dcmp[n] + datp[n] <=> dadp[n] + dcdp[n]	51727.1	cytidylate kinase (dCMP,dATP),nuclear
CYTK7n	p	n	Nucleotide interconversion	utp[n] + cmp[n] <=> udp[n] + cdp[n]	51727.1	cytidylate kinase (CMP,UTP),nuclear
DITPtn	p	n	Transport, nuclear	ditp[c] <=> ditp[n]		dITP nuclear transport
NDPK10	p	n	Nucleotide interconversion	atp[c] + 3 h[c] + didp[c] <=> adp[c] + ditp[c]	10201.1 29922.1 29922.2 4830.1 4830.2 4831.1 4832.1	nucleoside-diphosphate kinase (ATP:dIDP)
CYTK2	p	n	Nucleotide interconversion	atp[c] + 3 h[c] + dcmp[c] <=> adp[c] + dcdp[c]	51727.1	cytidylate kinase (dCMP)
NDPK4n	p	n	Nucleotide interconversion	atp[n] + dtdp[n] <=> adp[n] + dttp[n]	4830.1 4830.2 4831.1	nucleoside-diphosphate kinase (ATP:dTDP), nuclear
DTDPtn	p	n	Transport, nuclear	dtdp[c] <=> dtdp[n]		dTDP nuclear transport
CHSTEROLtrc	p	n	Transport, endoplasmic reticular	chsterol[r] <=> chsterol[c]		transport of cholesterol into the cytosol
CHSTEROLt3	p	n	Transport, mitochondrial	chsterol[c] <=> chsterol[m]		cholesterol intracellular transport
Note: p stands for positive direction and n stands for negative direction for reversible reactions
