# Supplementary material for: Genome-wide metabolic model to improve understanding of CD4+ T cell metabolism, immunometabolism and application in drug design
Source: Royal Society of Chemistry journal article supplement (doi:10.1039/c5mb00480b), 2015-11-18
Supplement: c5mb00480b1.zip [file supplementary_Table_7-CD4_expressed_drug_targets.xlsx]

## Sheet: 77 genes annotation
ID	ENTREZ_GENE_ID	Gene Name	EC_NUMBER	KEGG_PATHWAY	GOTERM_MF_FAT	PUBMED_ID
NT5C	30833,	5', 3'-nucleotidase, cytosolic	3.1.3.-,3.1.3.5,	hsa00230:Purine metabolism,hsa00240:Pyrimidine metabolism,hsa00760:Nicotinate and nicotinamide metabolism,	GO:0000166~nucleotide binding,GO:0000287~magnesium ion binding,GO:0008252~nucleotidase activity,GO:0008253~5'-nucleotidase activity,GO:0016791~phosphatase activity,GO:0019103~pyrimidine nucleotide binding,GO:0043167~ion binding,GO:0043169~cation binding,GO:0046872~metal ion binding,	10681516,10899995,12234672,12418222,12477932,12714505,14702039,15136231,15489334,18669648,2157703,2833155,3186746,
NT5E	4907,	5'-nucleotidase, ecto (CD73)	3.1.3.5,	hsa00230:Purine metabolism,hsa00240:Pyrimidine metabolism,hsa00760:Nicotinate and nicotinamide metabolism,	GO:0000166~nucleotide binding,GO:0005506~iron ion binding,GO:0008198~ferrous iron binding,GO:0008252~nucleotidase activity,GO:0008253~5'-nucleotidase activity,GO:0008270~zinc ion binding,GO:0016791~phosphatase activity,GO:0043167~ion binding,GO:0043169~cation binding,GO:0046872~metal ion binding,GO:0046914~transition metal ion binding,	10470109,10570953,10898423,11004484,11046060,11067892,11149913,11163406,12000134,12030367,12170585,12477932,12774669,12892649,14574404,14578500,15489334,16303743,16344560,16709165,16718268,16735966,17065075,17487388,17671792,17911479,18062933,18566412,18636315,18787389,18924612,19008478,19159218,2129526,2137649,2173922,2848759,3036115,8000038,819433,8566797,8781432,9015312,9113412,9169488,9238677…
MTHFR	4524,	5,10-methylenetetrahydrofolate reductase (NADPH)	1.5.1.20,	hsa00670:One carbon pool by folate,hsa00680:Methane metabolism,	GO:0004489~methylenetetrahydrofolate reductase (NADPH) activity,GO:0016645~oxidoreductase activity, acting on the CH-NH group of donors,GO:0016646~oxidoreductase activity, acting on the CH-NH group of donors, NAD or NADP as acceptor,	10323741,10536004,10679944,10791559,11018168,11022077,11024398,11025596,11048629,11054348,11056246,11058711,11062308,11073851,11074490,11074524,11080594,11084577,11085290,11092508,11094304,11096266,11096270,11098041,11101473,11108898,11118403,11121176,11122096,11124649,11128675,11133719,11142765,11146461,11150582,11155296,11157318,11161947,11168435,11169021,11170082,11170083,11177206,11186937,111…
ATIC	471,	5-aminoimidazole-4-carboxamide ribonucleotide formyltransferase/IMP cyclohydrolase	2.1.2.3,3.5.4.10,	hsa00230:Purine metabolism,hsa00670:One carbon pool by folate,	GO:0003937~IMP cyclohydrolase activity,GO:0004372~glycine hydroxymethyltransferase activity,GO:0004643~phosphoribosylaminoimidazolecarboxamide formyltransferase activity,GO:0016814~hydrolase activity, acting on carbon-nitrogen (but not peptide) bonds, in cyclic amidines,	11096114,11948179,12477932,1286667,14756553,14966129,15114530,15457444,15489334,15677700,15815621,16344560,16447238,16947783,17009228,17181924,17353931,17410198,17439323,17530705,17617058,18083107,18845790,19016697,19161160,19193698,8567683,8867801,9378707,9598063,
NADSYN1	55191,	NAD synthetase 1	6.3.5.1,	hsa00760:Nicotinate and nicotinamide metabolism,	GO:0000166~nucleotide binding,GO:0001882~nucleoside binding,GO:0001883~purine nucleoside binding,GO:0003952~NAD+ synthase (glutamine-hydrolyzing) activity,GO:0005524~ATP binding,GO:0016879~ligase activity, forming carbon-nitrogen bonds,GO:0016884~carbon-nitrogen ligase activity, with glutamine as amido-N-donor,GO:0017076~purine nucleotide binding,GO:0030554~adenyl nucleotide binding,GO:0032553~ri…	10737800,12477932,12547821,14702039,15231747,15489334,16189514,8125298,9373149,
NDUFS2	4720,	NADH dehydrogenase (ubiquinone) Fe-S protein 2, 49kDa (NADH-coenzyme Q reductase)	1.6.5.3,1.6.99.3,	hsa00190:Oxidative phosphorylation,hsa05010:Alzheimer's disease,hsa05012:Parkinson's disease,hsa05016:Huntington's disease,	GO:0000166~nucleotide binding,GO:0003954~NADH dehydrogenase activity,GO:0005506~iron ion binding,GO:0008137~NADH dehydrogenase (ubiquinone) activity,GO:0009055~electron carrier activity,GO:0016651~oxidoreductase activity, acting on NADH or NADPH,GO:0016655~oxidoreductase activity, acting on NADH or NADPH, quinone or similar compound as acceptor,GO:0043167~ion binding,GO:0043169~cation binding,GO:…	11112787,11220739,12477932,12857734,14749350,15250827,15489334,16710414,16806233,17209039,17601350,1832859,18682780,18977241,8125298,9373149,9585441,9647766,9878551,
NDUFS3	4722,	NADH dehydrogenase (ubiquinone) Fe-S protein 3, 30kDa (NADH-coenzyme Q reductase)	1.6.5.3,1.6.99.3,	hsa00190:Oxidative phosphorylation,hsa05010:Alzheimer's disease,hsa05012:Parkinson's disease,hsa05016:Huntington's disease,	GO:0003954~NADH dehydrogenase activity,GO:0008137~NADH dehydrogenase (ubiquinone) activity,GO:0009055~electron carrier activity,GO:0016651~oxidoreductase activity, acting on NADH or NADPH,GO:0016655~oxidoreductase activity, acting on NADH or NADPH, quinone or similar compound as acceptor,GO:0050136~NADH dehydrogenase (quinone) activity,	10931946,10967146,11112787,11771736,12477932,14729820,15250827,15489334,1602151,16344560,16826196,17209039,17601350,18485875,18977241,19034380,19343046,8125298,9373149,9647766,9763677,9878551,
NDUFS7	374291,	NADH dehydrogenase (ubiquinone) Fe-S protein 7, 20kDa (NADH-coenzyme Q reductase)	1.6.5.3,1.6.99.3,	hsa00190:Oxidative phosphorylation,hsa05010:Alzheimer's disease,hsa05012:Parkinson's disease,hsa05016:Huntington's disease,	GO:0003954~NADH dehydrogenase activity,GO:0005506~iron ion binding,GO:0008137~NADH dehydrogenase (ubiquinone) activity,GO:0016651~oxidoreductase activity, acting on NADH or NADPH,GO:0016655~oxidoreductase activity, acting on NADH or NADPH, quinone or similar compound as acceptor,GO:0043167~ion binding,GO:0043169~cation binding,GO:0046872~metal ion binding,GO:0046914~transition metal ion binding,G…	10330338,10360771,11112787,11418099,12477932,14702039,14749350,15057824,15186778,15269216,15317750,15489334,16169070,17275378,17601350,17604671,18435906,18977241,8125298,8938450,9373149,9878551,
APRT	353,	adenine phosphoribosyltransferase	2.4.2.7,	hsa00230:Purine metabolism,	GO:0000166~nucleotide binding,GO:0001882~nucleoside binding,GO:0001883~purine nucleoside binding,GO:0002054~nucleobase binding,GO:0002055~adenine binding,GO:0002060~purine binding,GO:0003999~adenine phosphoribosyltransferase activity,GO:0016208~AMP binding,GO:0016763~transferase activity, transferring pentosyl groups,GO:0017076~purine nucleotide binding,GO:0030554~adenyl nucleotide binding,GO:003…	10369268,10479485,10481956,10937693,11243733,116697,12477932,12665801,1353080,14674717,15196008,15489334,15571218,16130169,17126311,17353931,1746557,17974005,18399692,1985452,2067530,2135300,2227951,2502918,3343350,3531209,3554238,3680503,3684585,457664,7660991,7685481,7915931,8455250,869896,8882882,8889579,9298830,9521589,
ADA	100,	adenosine deaminase	3.5.4.4,	hsa00230:Purine metabolism,hsa05340:Primary immunodeficiency,	GO:0001882~nucleoside binding,GO:0001883~purine nucleoside binding,GO:0004000~adenosine deaminase activity,GO:0008270~zinc ion binding,GO:0016814~hydrolase activity, acting on carbon-nitrogen (but not peptide) bonds, in cyclic amidines,GO:0019239~deaminase activity,GO:0043167~ion binding,GO:0043169~cation binding,GO:0046872~metal ion binding,GO:0046914~transition metal ion binding,	10506947,11121182,11125033,11278278,11354825,11534018,11772392,11780052,11901152,11999881,12104097,12113294,12150791,12381379,12477932,12712614,12774669,12809673,1284479,12935677,14684150,14726805,15016824,15063762,15257174,15281007,15489334,15632314,15761857,15983379,16133068,16221767,16224193,16410722,16670267,16724628,16754522,16886895,1696926,16970880,17181544,17243920,17287605,17340203,17397…
ADK	132,	adenosine kinase	2.7.1.20,	hsa00230:Purine metabolism,	GO:0000166~nucleotide binding,GO:0000287~magnesium ion binding,GO:0001882~nucleoside binding,GO:0001883~purine nucleoside binding,GO:0004001~adenosine kinase activity,GO:0005524~ATP binding,GO:0017076~purine nucleotide binding,GO:0019205~nucleobase, nucleoside, nucleotide kinase activity,GO:0019206~nucleoside kinase activity,GO:0030554~adenyl nucleotide binding,GO:0032553~ribonucleotide binding,G…	10215863,11242543,12112843,12477932,12820662,15489334,17154503,18309031,185014,18600536,18600545,621091,8577746,8917457,9070863,9843365,
AMPD1	270,	adenosine monophosphate deaminase 1 (isoform M)	3.5.4.6,	hsa00230:Purine metabolism,	GO:0003876~AMP deaminase activity,GO:0016814~hydrolase activity, acting on carbon-nitrogen (but not peptide) bonds, in cyclic amidines,GO:0019239~deaminase activity,	10086964,10996775,11028479,11102975,12117480,12213808,12477932,12783984,1370861,1400401,14702039,15135700,15173240,15239633,15309698,15368811,15489334,15677729,15793265,15882662,16021915,16021918,1631143,16360962,16570231,16671104,16707139,16710414,16767606,16875916,16947783,16959974,16996850,17376785,17463303,17530705,17565237,17630210,17687759,18224333,18338202,18409530,18493842,18801770,188552…
AK2	204,	adenylate kinase 2	2.7.4.3,	hsa00230:Purine metabolism,	GO:0000166~nucleotide binding,GO:0001882~nucleoside binding,GO:0001883~purine nucleoside binding,GO:0004017~adenylate kinase activity,GO:0005524~ATP binding,GO:0016776~phosphotransferase activity, phosphate group as acceptor,GO:0017076~purine nucleotide binding,GO:0019201~nucleotide kinase activity,GO:0019205~nucleobase, nucleoside, nucleotide kinase activity,GO:0019206~nucleoside kinase activity…	10218571,12477932,14702039,15489334,15862967,16710414,17952061,18404568,19043416,19043417,19054851,195572,6182143,6961883,8843353,9434148,9504408,
ADH4	127,	alcohol dehydrogenase 4 (class II), pi polypeptide	1.1.1.1,	hsa00010:Glycolysis / Gluconeogenesis,hsa00071:Fatty acid metabolism,hsa00350:Tyrosine metabolism,hsa00830:Retinol metabolism,hsa00980:Metabolism of xenobiotics by cytochrome P450,hsa00982:Drug metabolism,	GO:0000166~nucleotide binding,GO:0003960~NADPH:quinone reductase activity,GO:0004022~alcohol dehydrogenase (NAD) activity,GO:0004024~alcohol dehydrogenase activity, zinc-dependent,GO:0004032~aldehyde reductase activity,GO:0004033~aldo-keto reductase activity,GO:0004745~retinol dehydrogenase activity,GO:0005501~retinoid binding,GO:0005503~all-trans retinal binding,GO:0008270~zinc ion binding,GO:00…	10407146,11009184,11279029,11752456,11900616,11916005,11964133,11997393,12477932,12631290,1362387,14702039,14745297,15369820,15489334,15815621,15863808,16220108,16237392,16787387,17069770,18331377,18801187,1889753,18996923,19182438,19193628,19343046,3036213,3036213],3466164,8032153,9570155,
ADH5	128,642443,	alcohol dehydrogenase 5 (class III), chi polypeptide, pseudogene 4; alcohol dehydrogenase 5 (class III), chi polypeptide	1.1.1.-,1.1.1.1,1.1.1.284,	hsa00010:Glycolysis / Gluconeogenesis,hsa00071:Fatty acid metabolism,hsa00350:Tyrosine metabolism,hsa00680:Methane metabolism,hsa00830:Retinol metabolism,hsa00980:Metabolism of xenobiotics by cytochrome P450,hsa00982:Drug metabolism,	GO:0000166~nucleotide binding,GO:0004022~alcohol dehydrogenase (NAD) activity,GO:0005504~fatty acid binding,GO:0008270~zinc ion binding,GO:0008289~lipid binding,GO:0009055~electron carrier activity,GO:0016620~oxidoreductase activity, acting on the aldehyde or oxo group of donors, NAD or NADP as acceptor,GO:0018467~formaldehyde dehydrogenase activity,GO:0031406~carboxylic acid binding,GO:0033293~m…	10661511,10978156,12004059,12141816,12196016,12477932,12484756,12604204,1446828,1453005,14608084,15489334,16169070,16201836,16605250,16685648,17185388,17543375,18095160,18331377,18636124,18996923,19165527,2679557,2818582,2934732,2936344,3365377,3365377],6375718,6424546,7948423,8460164,8494891,8503936,9018047,
ADH6	130,	alcohol dehydrogenase 6 (class V)	1.1.1.1,	hsa00010:Glycolysis / Gluconeogenesis,hsa00071:Fatty acid metabolism,hsa00350:Tyrosine metabolism,hsa00830:Retinol metabolism,hsa00980:Metabolism of xenobiotics by cytochrome P450,hsa00982:Drug metabolism,	GO:0004022~alcohol dehydrogenase (NAD) activity,GO:0004024~alcohol dehydrogenase activity, zinc-dependent,GO:0008270~zinc ion binding,GO:0009055~electron carrier activity,GO:0043167~ion binding,GO:0043169~cation binding,GO:0046872~metal ion binding,GO:0046914~transition metal ion binding,	10975466,11095947,12050823,12477932,14702039,15489334,1593644,16685648,17185388,1755855,1881901,19343046,2198032,7695785,
ADH7	131,	alcohol dehydrogenase 7 (class IV), mu or sigma polypeptide	1.1.1.1,	hsa00010:Glycolysis / Gluconeogenesis,hsa00071:Fatty acid metabolism,hsa00350:Tyrosine metabolism,hsa00830:Retinol metabolism,hsa00980:Metabolism of xenobiotics by cytochrome P450,hsa00982:Drug metabolism,	GO:0004022~alcohol dehydrogenase (NAD) activity,GO:0004024~alcohol dehydrogenase activity, zinc-dependent,GO:0004031~aldehyde oxidase activity,GO:0004745~retinol dehydrogenase activity,GO:0005501~retinoid binding,GO:0008270~zinc ion binding,GO:0008289~lipid binding,GO:0016623~oxidoreductase activity, acting on the aldehyde or oxo group of donors, oxygen as acceptor,GO:0019840~isoprenoid binding,G…	10631979,11997393,14502680,15456134,15489334,15815621,1592118,16180008,16685648,17185388,17486761,17918242,17921519,18231859,18331377,18500343,19193628,19343046,7771649,7876099,7876191,7925371,8074657,8082805,8125298,8195208,8824810,9228021,9373149,9600267,
ALDH2	217,	aldehyde dehydrogenase 2 family (mitochondrial)	1.2.1.3,	hsa00010:Glycolysis / Gluconeogenesis,hsa00053:Ascorbate and aldarate metabolism,hsa00071:Fatty acid metabolism,hsa00280:Valine, leucine and isoleucine degradation,hsa00310:Lysine degradation,hsa00330:Arginine and proline metabolism,hsa00340:Histidine metabolism,hsa00380:Tryptophan metabolism,hsa00410:beta-Alanine metabolism,hsa00561:Glycerolipid metabolism,hsa00620:Pyruvate metabolism,hsa00640:P…	GO:0004029~aldehyde dehydrogenase (NAD) activity,GO:0004030~aldehyde dehydrogenase [NAD(P)+] activity,GO:0009055~electron carrier activity,GO:0016620~oxidoreductase activity, acting on the aldehyde or oxo group of donors, NAD or NADP as acceptor,GO:0042802~identical protein binding,	10631996,11051375,11115843,11117576,11210104,11238183,11375898,11410735,11410744,11468345,11510748,11520401,11584144,11600186,11692094,11696658,11744614,11748356,11767261,11798074,11925062,11966948,12010862,12033531,12080432,12082496,12089173,12119207,12164325,12168074,12170102,12173598,12189549,12198368,12198369,12211622,12213289,12223435,12351924,12376487,12387818,12419833,12452318,12477932,124…
AKR1A1	10327,	aldo-keto reductase family 1, member A1 (aldehyde reductase)	1.1.1.2,	hsa00010:Glycolysis / Gluconeogenesis,hsa00561:Glycerolipid metabolism,	GO:0004032~aldehyde reductase activity,GO:0004033~aldo-keto reductase activity,GO:0008106~alcohol dehydrogenase (NADP+) activity,GO:0009055~electron carrier activity,GO:0047939~L-glucuronate reductase activity,	10393438,10486210,10510318,11444797,11716357,12477932,15231747,15299353,15489334,15769597,1602151,16543247,17149600,18495158,18676680,1901806,19423521,2113526,2498333,3615425,7669785,7827091,8268209,8405190,9693960,
ALPL	249,	alkaline phosphatase, liver/bone/kidney	3.1.3.1,	hsa00790:Folate biosynthesis,	GO:0000287~magnesium ion binding,GO:0004035~alkaline phosphatase activity,GO:0008270~zinc ion binding,GO:0016791~phosphatase activity,GO:0043167~ion binding,GO:0043169~cation binding,GO:0046872~metal ion binding,GO:0046914~transition metal ion binding,	10094560,10332035,10508980,10679946,10690885,10737975,10834525,10865224,11073119,11438998,11479741,11528114,11745997,11760847,11810413,11834095,11855933,11999978,12357339,12372831,12397600,12412800,12477932,12638946,12788869,12815606,12920074,1409720,14517339,1458595,14702039,14756545,15135428,15208311,15230135,15476587,15489334,15562030,15629439,15660230,15694177,15824850,16344560,16583221,16602…
ARSA	410,	arylsulfatase A	3.1.6.8,	hsa00600:Sphingolipid metabolism,hsa04142:Lysosome,	GO:0004065~arylsulfatase activity,GO:0004098~cerebroside-sulfatase activity,GO:0005509~calcium ion binding,GO:0008484~sulfuric ester hydrolase activity,GO:0043167~ion binding,GO:0043169~cation binding,GO:0046872~metal ion binding,	10220151,10359658,10381328,10477432,10493829,10533072,10591208,10751093,11020646,11061266,11124905,11333871,11456299,11777924,11857580,11941485,12081727,12459318,12473917,12477932,12503099,12788103,12888274,1352356,1352993,1353340,1357970,14517960,14680985,14702039,15026521,15146197,15188402,15326627,15342556,15375602,15461802,15489334,15710861,15772092,16110195,16140556,16311251,16341674,1634456…
ASNS	440,	asparagine synthetase	6.3.5.4,	hsa00250:Alanine, aspartate and glutamate metabolism,hsa00910:Nitrogen metabolism,	GO:0000166~nucleotide binding,GO:0001882~nucleoside binding,GO:0001883~purine nucleoside binding,GO:0004066~asparagine synthase (glutamine-hydrolyzing) activity,GO:0005524~ATP binding,GO:0016879~ligase activity, forming carbon-nitrogen bonds,GO:0016884~carbon-nitrogen ligase activity, with glutamine as amido-N-donor,GO:0017076~purine nucleotide binding,GO:0030554~adenyl nucleotide binding,GO:0032…	10085239,11867623,11960987,12097650,12351626,12477932,12690205,12853948,12949534,15385533,15489334,15674423,16023613,16169070,16344560,16598302,17088436,17276738,17380207,17409444,18840095,18852115,18940792,19054556,2564390,2565875,2569668,2573597,2714790,2886907,3470743,6137879,7904551,8093451,9847074,9861020,
CAD	790,	carbamoyl-phosphate synthetase 2, aspartate transcarbamylase, and dihydroorotase	2.1.3.2,3.5.2.3,6.3.5.5,	hsa00240:Pyrimidine metabolism,hsa00250:Alanine, aspartate and glutamate metabolism,	GO:0000166~nucleotide binding,GO:0001882~nucleoside binding,GO:0001883~purine nucleoside binding,GO:0004070~aspartate carbamoyltransferase activity,GO:0004086~carbamoyl-phosphate synthase activity,GO:0004088~carbamoyl-phosphate synthase (glutamine-hydrolyzing) activity,GO:0004151~dihydroorotase activity,GO:0004672~protein kinase activity,GO:0005524~ATP binding,GO:0008270~zinc ion binding,GO:00165…	11854437,11986331,12438317,12477932,12746293,14523024,14559996,14743216,15324660,15326225,15489334,15621215,15890648,16155188,16959974,16964243,17081983,18187866,18669648,18679823,18691976,1979741,2565865,2885743,4092695,8619816,9525610,
CBR1	873,	carbonyl reductase 1	1.1.1.184,1.1.1.189,1.1.1.197,	hsa00590:Arachidonic acid metabolism,	GO:0004090~carbonyl reductase (NADPH) activity,GO:0047021~15-hydroxyprostaglandin dehydrogenase (NADP+) activity,GO:0050221~prostaglandin-E2 9-reductase activity,	10091578,10830953,11306092,11771743,12123751,12477932,12836057,1453004,1540623,15489334,15799708,17344335,17353931,17569794,17697149,17912391,18083107,18493841,18551042,18676680,18826943,19016765,19022938,19027726,1921984,2182121,3083821,3141401,3311025,7005231,7705364,8421682,8432528,9740676,
CES2	8824,	carboxylesterase 2 (intestine, liver)	3.1.1.1,	hsa00983:Drug metabolism,	GO:0004091~carboxylesterase activity,	10452915,11076863,11230166,12417987,12477932,12721789,12835618,12960109,14702039,15475243,15475733,15489334,15489336,15592324,15618752,15967118,16344560,16381901,16690525,16963839,17483951,17537833,17640957,17764701,17974005,18259949,18305377,18473752,18794728,18797458,18983829,19159218,19274604,19343046,19349540,8125298,9144407,9169443,9373149,
CAT	847,	catalase	1.11.1.6,	hsa00380:Tryptophan metabolism,hsa00680:Methane metabolism,hsa05014:Amyotrophic lateral sclerosis (ALS),	GO:0000166~nucleotide binding,GO:0004046~aminoacylase activity,GO:0004096~catalase activity,GO:0004601~peroxidase activity,GO:0005506~iron ion binding,GO:0016209~antioxidant activity,GO:0016684~oxidoreductase activity, acting on peroxide as acceptor,GO:0016811~hydrolase activity, acting on carbon-nitrogen (but not peptide) bonds, in linear amides,GO:0020037~heme binding,GO:0042802~identical prote…	10096042,10488055,10567403,10656833,10666617,10960480,11106583,11134921,11182520,11313354,11479740,11728823,11729237,11837458,11907164,12032677,12110367,12165738,12231449,12372460,12447480,12468545,12469627,12477932,12487379,12516882,12603857,12606529,12665801,12730222,12777400,12824748,12838770,12950161,14580687,14702039,14710363,14962975,14975589,15125229,15131792,15133753,15182856,15203188,154…
COMT	1312,	catechol-O-methyltransferase	2.1.1.6,	hsa00140:Steroid hormone biosynthesis,hsa00350:Tyrosine metabolism,	GO:0000287~magnesium ion binding,GO:0008171~O-methyltransferase activity,GO:0016206~catechol O-methyltransferase activity,GO:0043167~ion binding,GO:0043169~cation binding,GO:0046872~metal ion binding,	10391209,10395222,10854207,11054766,11054777,11058906,11121168,11121178,11140838,11142424,11150892,11163295,11166081,11171904,11381111,11401913,11426511,11434504,11443519,11502905,11525417,11525422,11556837,11577006,11581117,11597779,11693181,11705709,11706521,11772685,11773866,11840516,11865133,11873938,11900601,11907189,11925305,11927842,11990384,11992559,11992560,12011284,12029502,12036913,120…
CHKA	1119,	choline kinase alpha	2.7.1.32,	hsa00564:Glycerophospholipid metabolism,	GO:0000166~nucleotide binding,GO:0001882~nucleoside binding,GO:0001883~purine nucleoside binding,GO:0004091~carboxylesterase activity,GO:0004103~choline kinase activity,GO:0004104~cholinesterase activity,GO:0005524~ATP binding,GO:0017076~purine nucleotide binding,GO:0030554~adenyl nucleotide binding,GO:0032553~ribonucleotide binding,GO:0032555~purine ribonucleotide binding,GO:0032559~adenyl ribon…	10363580,11840339,12062430,12082619,12176020,12477932,14702039,15003397,15489334,1618328,16554811,16820874,17007874,17184542,18172309,18296102,208357,36885,8069533,9038210,9113621,
CHKB	1120,1375,	choline kinase beta; carnitine palmitoyltransferase 1B (muscle)	2.3.1.21,2.7.1.32,2.7.1.82,	hsa00071:Fatty acid metabolism,hsa00564:Glycerophospholipid metabolism,hsa03320:PPAR signaling pathway,hsa04920:Adipocytokine signaling pathway,	GO:0000166~nucleotide binding,GO:0001882~nucleoside binding,GO:0001883~purine nucleoside binding,GO:0004095~carnitine O-palmitoyltransferase activity,GO:0004103~choline kinase activity,GO:0004305~ethanolamine kinase activity,GO:0005524~ATP binding,GO:0008374~O-acyltransferase activity,GO:0016406~carnitine O-acyltransferase activity,GO:0016409~palmitoyltransferase activity,GO:0016416~O-palmitoyltr…	10408760,10493829,10591208,10706593,10918069,11001805,11095714,11257506,11258795,12015320,12477932,12565845,14702039,15003397,15356291,15461802,15489334,15579906,15647998,16054041,17089095,17924679,17987377,18660489,18820697,18823527,18996102,19074885,19404393,8125298,8679700,9070950,9199240,9224698,9344464,9370318,9373149,9487136,
CEPT1	10390,	choline/ethanolamine phosphotransferase 1	2.7.8.1,2.7.8.2,		GO:0000287~magnesium ion binding,GO:0004142~diacylglycerol cholinephosphotransferase activity,GO:0004307~ethanolaminephosphotransferase activity,GO:0016780~phosphotransferase activity, for other substituted phosphate groups,GO:0017169~CDP-alcohol phosphatidyltransferase activity,GO:0030145~manganese ion binding,GO:0043167~ion binding,GO:0043169~cation binding,GO:0046872~metal ion binding,GO:00469…	10191259,10893425,12216837,12221122,12477932,14702039,15489334,16710414,17974005,18691976,
CCBL1	883,	cysteine conjugate-beta lyase, cytoplasmic	2.6.1.64,2.6.1.7,4.4.1.13,		GO:0008483~transaminase activity,GO:0016212~kynurenine-oxoglutarate transaminase activity,GO:0016769~transferase activity, transferring nitrogenous groups,GO:0016846~carbon-sulfur lyase activity,GO:0016847~1-aminocyclopropane-1-carboxylate synthase activity,GO:0019842~vitamin binding,GO:0030170~pyridoxal phosphate binding,GO:0047316~glutamine-phenylpyruvate transaminase activity,GO:0047804~cystei…	10369878,12477932,14702039,15016471,15164053,15364907,15489334,16344560,16376499,16463021,16828464,17207965,18342615,2139845,7814371,7883047,8736988,8968194,
CDA	978,	cytidine deaminase	3.5.4.5,	hsa00240:Pyrimidine metabolism,hsa00983:Drug metabolism,	GO:0001882~nucleoside binding,GO:0004126~cytidine deaminase activity,GO:0008270~zinc ion binding,GO:0016814~hydrolase activity, acting on carbon-nitrogen (but not peptide) bonds, in cyclic amidines,GO:0019239~deaminase activity,GO:0042802~identical protein binding,GO:0042803~protein homodimerization activity,GO:0043167~ion binding,GO:0043169~cation binding,GO:0046872~metal ion binding,GO:0046914~…	10497201,12107413,12113294,12477932,12651944,12844405,14565460,14565461,14744791,14983087,15489334,15689149,15713780,16303324,16304576,16446974,16507781,16710414,17194903,17464349,17479107,17640070,18347182,18537153,18538445,18600531,18762567,18775979,19293806,53069,7923172,8001985,8422236,9596658,9878810,
CMPK1	51727,	cytidine monophosphate (UMP-CMP) kinase 1, cytosolic	2.7.4.14,	hsa00240:Pyrimidine metabolism,	GO:0000166~nucleotide binding,GO:0001882~nucleoside binding,GO:0001883~purine nucleoside binding,GO:0004127~cytidylate kinase activity,GO:0004849~uridine kinase activity,GO:0005524~ATP binding,GO:0016776~phosphotransferase activity, phosphate group as acceptor,GO:0017076~purine nucleotide binding,GO:0019201~nucleotide kinase activity,GO:0019205~nucleobase, nucleoside, nucleotide kinase activity,G…	10462544,10931946,11681623,11912132,12477932,12694191,1286669,15163660,15489334,15550676,15606899,16710414,17608725,8125298,8313870,9373149,
CYP2D6	1565,	cytochrome P450, family 2, subfamily D, polypeptide 6	1.14.14.1,	hsa00982:Drug metabolism,	GO:0005506~iron ion binding,GO:0009055~electron carrier activity,GO:0016712~oxidoreductase activity, acting on paired donors, with incorporation or reduction of molecular oxygen, reduced flavin or flavoprotein as one donor, and incorporation of one atom of oxygen,GO:0020037~heme binding,GO:0043167~ion binding,GO:0043169~cation binding,GO:0046872~metal ion binding,GO:0046906~tetrapyrrole binding,G…	10064570,10233205,10493260,10591208,10675100,11037800,11037802,11055624,11097351,11097352,11147929,11204351,11207030,11207032,11214775,11266079,11291049,11294012,11295783,11303596,11372584,11376189,11422605,11422615,11442888,11470994,11477317,11505219,11520401,11549206,11560558,11668217,11682257,11702057,11735606,11741249,11750286,11751440,11753271,11753272,11763000,11778144,11791895,11809184,118…
CYP51A1	1595,	cytochrome P450, family 51, subfamily A, polypeptide 1	1.14.13.70,	hsa00100:Steroid biosynthesis,	GO:0005506~iron ion binding,GO:0008398~sterol 14-demethylase activity,GO:0009055~electron carrier activity,GO:0020037~heme binding,GO:0032451~demethylase activity,GO:0043167~ion binding,GO:0043169~cation binding,GO:0046872~metal ion binding,GO:0046906~tetrapyrrole binding,GO:0046914~transition metal ion binding,	11678326,12145339,12477932,12690205,12824470,12853948,14702039,15128046,15489334,15611056,16344560,18660489,18676367,8024575,8619637,8797093,8809088,8845856,8975714,
DCTD	1635,	dCMP deaminase	3.5.4.12,	hsa00240:Pyrimidine metabolism,	GO:0004132~dCMP deaminase activity,GO:0008270~zinc ion binding,GO:0016814~hydrolase activity, acting on carbon-nitrogen (but not peptide) bonds, in cyclic amidines,GO:0019239~deaminase activity,GO:0043167~ion binding,GO:0043169~cation binding,GO:0046872~metal ion binding,GO:0046914~transition metal ion binding,	12477932,15489334,15592455,17602053,3627112,7642519,7685356,8448179,
DCK	1633,	deoxycytidine kinase	2.7.1.74,	hsa00230:Purine metabolism,hsa00240:Pyrimidine metabolism,	GO:0000166~nucleotide binding,GO:0000287~magnesium ion binding,GO:0001882~nucleoside binding,GO:0001883~purine nucleoside binding,GO:0001884~pyrimidine nucleoside binding,GO:0004137~deoxycytidine kinase activity,GO:0005524~ATP binding,GO:0008144~drug binding,GO:0017076~purine nucleotide binding,GO:0019136~deoxynucleoside kinase activity,GO:0019205~nucleobase, nucleoside, nucleotide kinase activit…	11687801,11830489,11952160,12477932,12535661,12628850,12808445,14514691,14702039,15028279,15489334,15561147,15564883,15571255,15571257,15571258,15571259,15978330,16169070,16361699,16401075,16421443,16799820,16969512,17065053,17065079,17065080,17065085,17065091,17530837,17602053,17855478,18258203,18361501,18600530,18600545,18669648,18691976,18775979,18974616,19428333,1996353,2013338,2542307,631506…
DGUOK	1716,	deoxyguanosine kinase	2.7.1.113,	hsa00230:Purine metabolism,	GO:0000166~nucleotide binding,GO:0001882~nucleoside binding,GO:0001883~purine nucleoside binding,GO:0004138~deoxyguanosine kinase activity,GO:0005524~ATP binding,GO:0017076~purine nucleotide binding,GO:0019136~deoxynucleoside kinase activity,GO:0019205~nucleobase, nucleoside, nucleotide kinase activity,GO:0019206~nucleoside kinase activity,GO:0030554~adenyl nucleotide binding,GO:0032553~ribonucle…	10951205,11294860,11337467,11427893,11687800,12054684,12205643,12210798,12477932,12535661,15489334,15639197,15883261,17065091,17073823,17490647,18205204,18600530,8692979,8706825,8975728,
DHFR	1719,	dihydrofolate reductase	1.5.1.3,	hsa00670:One carbon pool by folate,hsa00790:Folate biosynthesis,	GO:0000166~nucleotide binding,GO:0004146~dihydrofolate reductase activity,GO:0016645~oxidoreductase activity, acting on the CH-NH group of donors,GO:0016646~oxidoreductase activity, acting on the CH-NH group of donors, NAD or NADP as acceptor,GO:0048037~cofactor binding,GO:0050661~NADP or NADPH binding,GO:0050662~coenzyme binding,	10749676,10898545,11448909,11779239,11964483,11996001,12084458,12096917,12384595,12477932,12588981,12612070,12657784,12788094,12812497,12925791,14664697,14679136,14735580,15039552,15489334,15755837,15817466,16116078,16124424,16467096,16735474,16969375,17237763,1731871,17336564,17413111,17449906,17486595,17597297,17683969,17917571,18045573,18056255,18093916,18247058,18451149,18498051,18636124,1867…
DPYD	1806,	dihydropyrimidine dehydrogenase	1.3.1.2,	hsa00240:Pyrimidine metabolism,hsa00410:beta-Alanine metabolism,hsa00770:Pantothenate and CoA biosynthesis,hsa00983:Drug metabolism,	GO:0000166~nucleotide binding,GO:0001882~nucleoside binding,GO:0001883~purine nucleoside binding,GO:0004152~dihydroorotate dehydrogenase activity,GO:0004158~dihydroorotate oxidase activity,GO:0004159~dihydrouracil dehydrogenase (NAD+) activity,GO:0005506~iron ion binding,GO:0009055~electron carrier activity,GO:0016628~oxidoreductase activity, acting on the CH-CH group of donors, NAD or NADP as ac…	10410956,10606257,10923099,11072080,11267945,11555601,11862480,11895907,11988088,11992400,12025228,12047484,12209976,12360106,12477932,12576451,12822071,12844478,12851836,14519634,14562021,14654904,14702039,14702180,15017333,15025795,15069545,15102667,1512248,15132136,15254700,15316940,1544906,15489334,15709212,15939134,15993511,15999119,16021908,16132996,16328315,16344560,16361556,16710414,16771…
FPGS	2356,	folylpolyglutamate synthase	6.3.2.17,	hsa00790:Folate biosynthesis,	GO:0000166~nucleotide binding,GO:0001882~nucleoside binding,GO:0001883~purine nucleoside binding,GO:0004326~tetrahydrofolylpolyglutamate synthase activity,GO:0005524~ATP binding,GO:0016879~ligase activity, forming carbon-nitrogen bonds,GO:0016881~acid-amino acid ligase activity,GO:0017076~purine nucleotide binding,GO:0030554~adenyl nucleotide binding,GO:0032553~ribonucleotide binding,GO:0032555~p…	10777604,10964921,11309345,12477932,12663051,1409616,14676127,14702039,15164053,15489334,16122883,16169100,16707018,17119116,17286537,17875718,17891500,18381794,18672898,18830263,18842806,19016697,19093297,19131550,19161160,3828320,6934068,7721888,8521387,8662720,9312158,
GLUL	2752,	glutamate-ammonia ligase (glutamine synthetase)	6.3.1.2,	hsa00250:Alanine, aspartate and glutamate metabolism,hsa00330:Arginine and proline metabolism,hsa00910:Nitrogen metabolism,	GO:0000166~nucleotide binding,GO:0001882~nucleoside binding,GO:0001883~purine nucleoside binding,GO:0004356~glutamate-ammonia ligase activity,GO:0005524~ATP binding,GO:0016211~ammonia ligase activity,GO:0016879~ligase activity, forming carbon-nitrogen bonds,GO:0016880~acid-ammonia (or amide) ligase activity,GO:0017076~purine nucleotide binding,GO:0030554~adenyl nucleotide binding,GO:0032553~ribon…	10520940,10681395,12160938,12387715,12477932,14702039,14760703,15231748,15489334,15642443,16095760,16189514,16267323,16537434,16609938,16710414,1681907,17197094,17627080,17974005,18005987,18029348,18192886,18555765,18662667,19125103,19156168,19204801,2856920,2888076,7909780,7923146,8921392,8975719,9107685,9260745,9263280,
GCLC	2729,	glutamate-cysteine ligase, catalytic subunit	6.3.2.2,	hsa00480:Glutathione metabolism,	GO:0000166~nucleotide binding,GO:0000287~magnesium ion binding,GO:0001882~nucleoside binding,GO:0001883~purine nucleoside binding,GO:0004357~glutamate-cysteine ligase activity,GO:0005524~ATP binding,GO:0016595~glutamate binding,GO:0016597~amino acid binding,GO:0016879~ligase activity, forming carbon-nitrogen bonds,GO:0016881~acid-amino acid ligase activity,GO:0017076~purine nucleotide binding,GO:…	10395918,10439045,10515893,10733484,11444867,11820781,11844594,11972604,12070177,12477932,12500194,12598062,12663448,1350904,14574404,14676828,14702039,15451055,15485876,15489334,16183645,16322067,16403949,16491484,16599007,16690975,16766924,17109620,17207022,17333241,17344309,17479437,17601350,17643973,17921251,17961430,18035085,18066575,18276794,18420959,18549827,18560528,18614560,18926903,1897…
GLS	2744,	glutaminase	3.5.1.2,	hsa00250:Alanine, aspartate and glutamate metabolism,hsa00330:Arginine and proline metabolism,hsa00471:D-Glutamine and D-glutamate metabolism,hsa00910:Nitrogen metabolism,	GO:0004359~glutaminase activity,GO:0016811~hydrolase activity, acting on carbon-nitrogen (but not peptide) bonds, in linear amides,	10048485,10620514,10719215,11015561,11059811,11130979,11163757,12477932,12579526,14702039,14722097,14759258,15246207,15489334,15496140,15642443,17669570,19156168,19219026,19222703,3531404,6682827,6825316,8499480,8896557,
GLS2	27165,	glutaminase 2 (liver, mitochondrial)	3.5.1.2,	hsa00250:Alanine, aspartate and glutamate metabolism,hsa00330:Arginine and proline metabolism,hsa00471:D-Glutamine and D-glutamate metabolism,hsa00910:Nitrogen metabolism,	GO:0004359~glutaminase activity,GO:0016811~hydrolase activity, acting on carbon-nitrogen (but not peptide) bonds, in linear amides,	10620514,11130979,11163757,12163477,12444921,12477932,14675161,15489334,15496140,16637659,17669570,18088378,8619474,9110174,
GSTM1	2944,	glutathione S-transferase mu 1	2.5.1.18,	hsa00480:Glutathione metabolism,hsa00980:Metabolism of xenobiotics by cytochrome P450,hsa00982:Drug metabolism,	GO:0004364~glutathione transferase activity,GO:0016765~transferase activity, transferring alkyl or aryl (other than methyl) groups,	10625170,10791558,11037803,11040079,11044240,11045782,11045791,11045797,11051261,11055624,11062156,11081456,11097350,11131031,11137199,11142418,11159742,11159743,11162685,11165755,11169956,11173863,11181039,11181983,11186133,11191882,11198676,11201682,11219770,11227922,11230469,11234415,11257276,11271497,11275366,11278289,11283827,11291049,11295132,11297759,11300251,11303592,11307147,11325850,113…
GMPS	8833,	guanine monphosphate synthetase	6.3.5.2,	hsa00230:Purine metabolism,hsa00983:Drug metabolism,	GO:0000166~nucleotide binding,GO:0001882~nucleoside binding,GO:0001883~purine nucleoside binding,GO:0003921~GMP synthase activity,GO:0003922~GMP synthase (glutamine-hydrolyzing) activity,GO:0005524~ATP binding,GO:0016879~ligase activity, forming carbon-nitrogen bonds,GO:0016884~carbon-nitrogen ligase activity, with glutamine as amido-N-donor,GO:0017076~purine nucleotide binding,GO:0019899~enzyme …	11110714,12477932,15489334,16236267,17924679,18187866,6698284,7559506,7706277,8089153,8125298,9195163,9373149,
HPRT1	3251,	hypoxanthine phosphoribosyltransferase 1	2.4.2.8,	hsa00230:Purine metabolism,hsa00983:Drug metabolism,	GO:0000287~magnesium ion binding,GO:0002054~nucleobase binding,GO:0002060~purine binding,GO:0004422~hypoxanthine phosphoribosyltransferase activity,GO:0016763~transferase activity, transferring pentosyl groups,GO:0042802~identical protein binding,GO:0042803~protein homodimerization activity,GO:0043167~ion binding,GO:0043169~cation binding,GO:0046872~metal ion binding,GO:0046983~protein dimerizati…	10338013,10360366,11219770,11434773,11591653,11668636,11714443,11891689,12175903,12376523,12477932,12616531,12874812,1301916,14499622,14702039,14767555,1487231,15146465,15178494,15204312,15277709,15489334,15491638,1551676,15571220,15571222,15571223,15571224,15601998,15772651,15779006,15862283,15862284,15987524,15990111,16138897,16189514,16216473,16240158,16355393,16458330,16928426,16951156,170273…
IDO1	3620,	indoleamine 2,3-dioxygenase 1	1.13.11.52,	hsa00380:Tryptophan metabolism,	GO:0004833~tryptophan 2,3-dioxygenase activity,GO:0005506~iron ion binding,GO:0009055~electron carrier activity,GO:0016597~amino acid binding,GO:0016701~oxidoreductase activity, acting on single donors with incorporation of molecular oxygen,GO:0016702~oxidoreductase activity, acting on single donors with incorporation of molecular oxygen, incorporation of two atoms of oxygen,GO:0019825~oxygen bin…	11180976,11230514,11867636,11876748,11912287,11987129,12186837,12228717,12444143,12471139,12477932,12738417,12766158,12938169,12963490,13678429,1449503,14502282,14704851,14871294,14969766,15001472,15070879,15102781,15245429,15254595,15374002,15489334,15528322,15711557,15919929,15947091,15950064,15967116,16135011,16169070,16176799,16319139,16406698,16421220,16477023,16489067,16511306,16513157,1668…
MAT1A	4143,	methionine adenosyltransferase I, alpha	2.5.1.6,	hsa00270:Cysteine and methionine metabolism,hsa00450:Selenoamino acid metabolism,	GO:0000166~nucleotide binding,GO:0000287~magnesium ion binding,GO:0001882~nucleoside binding,GO:0001883~purine nucleoside binding,GO:0004478~methionine adenosyltransferase activity,GO:0005524~ATP binding,GO:0016765~transferase activity, transferring alkyl or aryl (other than methyl) groups,GO:0017076~purine nucleotide binding,GO:0030554~adenyl nucleotide binding,GO:0030955~potassium ion binding,G…	1056281,10677294,12477932,15164054,15489334,15935930,16341674,1683972,1772450,19048631,19161160,3812486,7213623,7271238,7560086,8314764,8393662,8770875,9042912,9175157,9482646,
MAT2A	4144,	methionine adenosyltransferase II, alpha	2.5.1.6,	hsa00270:Cysteine and methionine metabolism,hsa00450:Selenoamino acid metabolism,	GO:0000166~nucleotide binding,GO:0000287~magnesium ion binding,GO:0001882~nucleoside binding,GO:0001883~purine nucleoside binding,GO:0004478~methionine adenosyltransferase activity,GO:0005524~ATP binding,GO:0016765~transferase activity, transferring alkyl or aryl (other than methyl) groups,GO:0017076~purine nucleotide binding,GO:0030554~adenyl nucleotide binding,GO:0030955~potassium ion binding,G…	10644686,12477932,12660248,12671891,1426236,14530285,15489334,15815621,16413417,17631143,18041713,18423013,18669648,19019082,19048023,19048631,19161160,7213623,7665609,9703951,
MAT2B	27430,	methionine adenosyltransferase II, beta	2.5.1.6,	hsa00270:Cysteine and methionine metabolism,hsa00450:Selenoamino acid metabolism,	GO:0008831~dTDP-4-dehydrorhamnose reductase activity,GO:0048270~methionine adenosyltransferase regulator activity,	10644686,11076863,11230166,11256614,11337507,12477932,12671891,12878157,12880961,12975309,14702039,15489334,15489336,16381901,18041713,18045590,18698677,18753136,19027726,19048631,7213623,9055605,
MPO	4353,	myeloperoxidase	1.11.1.7,		GO:0003682~chromatin binding,GO:0004601~peroxidase activity,GO:0005506~iron ion binding,GO:0005509~calcium ion binding,GO:0016209~antioxidant activity,GO:0016684~oxidoreductase activity, acting on peroxide as acceptor,GO:0020037~heme binding,GO:0043167~ion binding,GO:0043169~cation binding,GO:0046872~metal ion binding,GO:0046906~tetrapyrrole binding,GO:0046914~transition metal ion binding,	10766826,10772654,10777476,10801811,10828600,11087769,11090610,11147929,11161635,11179831,11423389,11434421,11705390,11774269,11794452,11811524,11813987,11840286,11861298,11895912,11943609,11960308,11981455,11986950,12027420,12052532,12057865,12089442,12111688,12135010,12164325,12209361,12355548,12393699,12397651,12432558,12460800,12496042,12496043,12515618,12565898,12606047,12694338,12707270,127…
NOS1	4842,	nitric oxide synthase 1 (neuronal)	1.14.13.39,	hsa00330:Arginine and proline metabolism,hsa04020:Calcium signaling pathway,hsa04730:Long-term depression,hsa05010:Alzheimer's disease,hsa05014:Amyotrophic lateral sclerosis (ALS),	GO:0000166~nucleotide binding,GO:0001882~nucleoside binding,GO:0001883~purine nucleoside binding,GO:0004517~nitric-oxide synthase activity,GO:0005506~iron ion binding,GO:0005516~calmodulin binding,GO:0009055~electron carrier activity,GO:0010181~FMN binding,GO:0016597~amino acid binding,GO:0017076~purine nucleotide binding,GO:0020037~heme binding,GO:0030554~adenyl nucleotide binding,GO:0031406~car…	10068656,10187848,10203575,10221915,10400690,10443886,10488080,10518591,10681501,10824095,10874031,11043403,11052978,11086993,11112111,11284722,11404282,11511520,11525805,11546971,11590170,11591728,11668616,11747091,11786430,11849436,11849441,11867766,11890749,11960979,12081486,12081996,12140778,12210288,12237228,12403769,12421162,12445599,12477932,12485841,12490535,12531780,12572877,12630910,126…
NOS3	4846,	nitric oxide synthase 3 (endothelial cell)	1.14.13.39,	hsa00330:Arginine and proline metabolism,hsa04020:Calcium signaling pathway,hsa04370:VEGF signaling pathway,	GO:0000166~nucleotide binding,GO:0001882~nucleoside binding,GO:0001883~purine nucleoside binding,GO:0003779~actin binding,GO:0003785~actin monomer binding,GO:0004517~nitric-oxide synthase activity,GO:0005506~iron ion binding,GO:0005509~calcium ion binding,GO:0005516~calmodulin binding,GO:0008092~cytoskeletal protein binding,GO:0008270~zinc ion binding,GO:0009055~electron carrier activity,GO:00101…	10074942,10203575,10359729,10376603,10393859,10493752,10559837,10681501,10781589,10867216,11030378,11067831,11082161,11131266,11132600,11140838,11149895,11190479,11209024,11222793,11239195,11297817,11354626,11361058,11394896,11397791,11408851,11434508,11436125,11436560,11473956,11485372,11507973,11522715,11525805,11530961,11549906,11551002,11579346,11597199,11668050,11677358,11692081,11693755,117…
NME2	4830,4831,654364,	non-metastatic cells 1, protein (NM23A) expressed in; NME1-NME2 readthrough transcript; non-metastatic cells 2, protein (NM23B) expressed in	2.7.4.6,	hsa00230:Purine metabolism,hsa00240:Pyrimidine metabolism,	GO:0000166~nucleotide binding,GO:0000287~magnesium ion binding,GO:0001882~nucleoside binding,GO:0001883~purine nucleoside binding,GO:0003677~DNA binding,GO:0003700~transcription factor activity,GO:0004518~nuclease activity,GO:0004536~deoxyribonuclease activity,GO:0004550~nucleoside diphosphate kinase activity,GO:0005524~ATP binding,GO:0005525~GTP binding,GO:0008092~cytoskeletal protein binding,GO…	10512675,10602478,10611312,10618642,11042679,11082283,11274357,11280768,11319942,11555662,11687967,11726210,11776896,11835509,11872741,11918081,11919189,11935309,11960382,11963831,11998956,12007505,12009894,12105213,12135660,12137595,12163590,12174914,12200143,12405283,12452062,12474051,12477932,12486122,12486123,12490715,12524539,12601555,12624546,12628186,12669312,12684753,12859952,12883690,129…
PCYT1A	5130,	phosphate cytidylyltransferase 1, choline, alpha	2.7.7.15,	hsa00564:Glycerophospholipid metabolism,	GO:0004105~choline-phosphate cytidylyltransferase activity,GO:0016779~nucleotidyltransferase activity,GO:0070567~cytidylyltransferase activity,	10480912,12052891,12477932,15069071,15489334,16964243,17081983,17184542,17487921,18187866,18669648,18691976,2155660,2833521,7726555,7918629,8155650,8810902,9166786,9224626,
PCYT2	5833,	phosphate cytidylyltransferase 2, ethanolamine	2.7.7.14,	hsa00564:Glycerophospholipid metabolism,	GO:0004306~ethanolamine-phosphate cytidylyltransferase activity,GO:0016779~nucleotidyltransferase activity,GO:0070567~cytidylyltransferase activity,	12477932,14702039,15489334,16023412,16189514,18583706,9083101,9370320,
PGD	5226,	phosphogluconate dehydrogenase	1.1.1.44,	hsa00030:Pentose phosphate pathway,hsa00480:Glutathione metabolism,	GO:0000166~nucleotide binding,GO:0004616~phosphogluconate dehydrogenase (decarboxylating) activity,GO:0048037~cofactor binding,GO:0050661~NADP or NADPH binding,GO:0050662~coenzyme binding,	12477932,12498092,15231747,15489334,2283141,3858849,3864603,3932573,4517931,8978909,9920387,
PGK1	5230,	phosphoglycerate kinase 1	2.7.2.3,	hsa00010:Glycolysis / Gluconeogenesis,	GO:0000166~nucleotide binding,GO:0001882~nucleoside binding,GO:0001883~purine nucleoside binding,GO:0004618~phosphoglycerate kinase activity,GO:0005524~ATP binding,GO:0016774~phosphotransferase activity, carboxyl group as acceptor,GO:0017076~purine nucleotide binding,GO:0030554~adenyl nucleotide binding,GO:0032553~ribonucleotide binding,GO:0032555~purine ribonucleotide binding,GO:0032559~adenyl r…	11745195,12080078,12174867,12477932,12488440,12869554,14733918,14764427,15053920,15255553,1533225,1547346,15489334,15592455,15772651,1586722,15952740,1602151,16236267,16363799,17081983,17287340,17565005,17661373,18039033,18096512,18187866,18288812,1837552,18453750,18463139,18603805,18669648,19110265,2001457,2324090,2347494,2814502,2995995,3453121,6099325,6188151,6933565,6941312,7391027,7391028,74…
PLA2G4A	5321,	phospholipase A2, group IVA (cytosolic, calcium-dependent)	3.1.1.4,3.1.1.5,	hsa00564:Glycerophospholipid metabolism,hsa00565:Ether lipid metabolism,hsa00590:Arachidonic acid metabolism,hsa00591:Linoleic acid metabolism,hsa00592:alpha-Linolenic acid metabolism,hsa04010:MAPK signaling pathway,hsa04270:Vascular smooth muscle contraction,hsa04370:VEGF signaling pathway,hsa04664:Fc epsilon RI signaling pathway,hsa04666:Fc gamma R-mediated phagocytosis,hsa04730:Long-term depre…	GO:0004091~carboxylesterase activity,GO:0004620~phospholipase activity,GO:0004622~lysophospholipase activity,GO:0004623~phospholipase A2 activity,GO:0005509~calcium ion binding,GO:0016298~lipase activity,GO:0043167~ion binding,GO:0043169~cation binding,GO:0046872~metal ion binding,GO:0047498~calcium-dependent phospholipase A2 activity,	10085124,10319815,10625659,10978317,11416127,12048163,12050227,12124392,12414998,12477932,12765847,12885780,14609334,14686920,14726390,14769798,14963030,15007070,15007079,15041036,15118355,15259375,15276701,15294900,15302935,15305015,15318030,15331599,15358156,15475363,15489334,15789617,15975962,16181776,16221889,16344560,16407173,16409471,16462602,16585943,16603549,16710414,16754327,16829784,169…
PFAS	5198,	phosphoribosylformylglycinamidine synthase	6.3.5.3,	hsa00230:Purine metabolism,	GO:0000166~nucleotide binding,GO:0001882~nucleoside binding,GO:0001883~purine nucleoside binding,GO:0004642~phosphoribosylformylglycinamidine synthase activity,GO:0005524~ATP binding,GO:0016879~ligase activity, forming carbon-nitrogen bonds,GO:0016884~carbon-nitrogen ligase activity, with glutamine as amido-N-donor,GO:0017076~purine nucleotide binding,GO:0030554~adenyl nucleotide binding,GO:00325…	10548741,12477932,15489334,17081983,17353931,8110788,9205841,9328467,
PCCB	5096,	propionyl Coenzyme A carboxylase, beta polypeptide	6.4.1.3,	hsa00280:Valine, leucine and isoleucine degradation,hsa00640:Propanoate metabolism,	GO:0000166~nucleotide binding,GO:0001882~nucleoside binding,GO:0001883~purine nucleoside binding,GO:0004658~propionyl-CoA carboxylase activity,GO:0005524~ATP binding,GO:0016885~ligase activity, forming carbon-carbon bonds,GO:0017076~purine nucleotide binding,GO:0030554~adenyl nucleotide binding,GO:0032553~ribonucleotide binding,GO:0032555~purine ribonucleotide binding,GO:0032559~adenyl ribonucleo…	10447268,10502773,11749052,12007220,12189489,12477932,12559849,12757933,14671302,15059621,15489334,16344560,17051315,2154743,240144,2587127,2895916,3460076,6245185,7092804,8125298,8188292,8225321,8411997,9373149,9683601,
PDXP	57026,	pyridoxal (pyridoxine, vitamin B6) phosphatase	3.1.3.74,	hsa00750:Vitamin B6 metabolism,	GO:0000287~magnesium ion binding,GO:0016791~phosphatase activity,GO:0033883~pyridoxal phosphatase activity,GO:0043167~ion binding,GO:0043169~cation binding,GO:0046872~metal ion binding,	10591208,12477932,14522954,14702039,15489334,15580268,18029348,18058037,18510874,19000834,8132548,
PNPO	55163,	pyridoxamine 5'-phosphate oxidase	1.4.3.5,	hsa00750:Vitamin B6 metabolism,	GO:0000166~nucleotide binding,GO:0004733~pyridoxamine-phosphate oxidase activity,GO:0010181~FMN binding,GO:0016638~oxidoreductase activity, acting on the CH-NH2 group of donors,GO:0016641~oxidoreductase activity, acting on the CH-NH2 group of donors, oxygen as acceptor,GO:0048037~cofactor binding,GO:0050662~coenzyme binding,	12477932,12824491,14702039,15182361,15489334,15772097,16344560,17287340,17851041,18485777,8125298,8889548,9373149,9601034,
SLC29A1	2030,	solute carrier family 29 (nucleoside transporters), member 1			GO:0005337~nucleoside transmembrane transporter activity,GO:0015932~nucleobase, nucleoside, nucleotide and nucleic acid transmembrane transporter activity,	10755314,11584005,11814344,12006583,12008078,12097333,12384580,12389626,12477932,12527552,12820662,14574404,14607828,14667819,14702039,14759222,15489334,15529184,15557207,15632314,15649894,15933265,16333246,16344560,16595656,16609362,16688763,16818266,16818276,16858130,16959974,17162590,17409283,17658213,17921321,17926640,18064606,18187485,18462193,18600541,18635603,18669648,18703227,19116148,191…
SRM	6723,	spermidine synthase	2.5.1.16,	hsa00270:Cysteine and methionine metabolism,hsa00330:Arginine and proline metabolism,hsa00410:beta-Alanine metabolism,hsa00480:Glutathione metabolism,	GO:0004766~spermidine synthase activity,GO:0016765~transferase activity, transferring alkyl or aryl (other than methyl) groups,	12477932,15489334,17585781,2069720,2344393,2730590,3248683,3481684,7629810,7774716,8343131,9020892,
SAT1	6303,	spermidine/spermine N1-acetyltransferase 1	2.3.1.57,	hsa00330:Arginine and proline metabolism,	GO:0004145~diamine N-acetyltransferase activity,GO:0008080~N-acetyltransferase activity,GO:0016407~acetyltransferase activity,GO:0016410~N-acyltransferase activity,	10646846,11256614,11485561,11779193,12083816,12215835,12427553,12477932,12539042,12600646,12803540,1417826,14506281,15146197,15159132,15213272,15479742,15489334,15905201,16169070,16189514,16207710,16262603,16389195,16455797,1652956,16544326,16637064,16757480,16769699,16854216,17065202,17516632,17875644,18430370,18660501,18759322,19051286,19162121,1985966,1989509,2241897,8033120,8573111,8670140,89…
SAT2	112483,	spermidine/spermine N1-acetyltransferase family member 2	2.3.1.57,	hsa00330:Arginine and proline metabolism,	GO:0004145~diamine N-acetyltransferase activity,GO:0008080~N-acetyltransferase activity,GO:0016407~acetyltransferase activity,GO:0016410~N-acyltransferase activity,	12477932,12803540,15283699,15342556,15489334,15761153,16189514,16596569,17119850,17558023,17850744,17875644,18676680,18949426,
SULT1E1	6783,	sulfotransferase family 1E, estrogen-preferring, member 1	2.8.2.4,	hsa00140:Steroid hormone biosynthesis,hsa00150:Androgen and estrogen metabolism,hsa00920:Sulfur metabolism,	GO:0004304~estrone sulfotransferase activity,GO:0005496~steroid binding,GO:0008146~sulfotransferase activity,GO:0008289~lipid binding,GO:0016782~transferase activity, transferring sulfur-containing groups,GO:0050294~steroid sulfotransferase activity,	10541560,10720750,11154739,11535246,11688987,11884392,12477932,12782487,14507642,14556660,15188402,15355916,15489334,15894657,16169070,16189514,16418064,16969590,16985250,17187396,17293380,17372239,17425406,17661084,18318428,18467089,18794126,18794456,18831980,19343046,19429440,7779757,7961757,8185618,8530066,8603401,8971138,9034160,9348232,
SULT1A1	6817,	sulfotransferase family, cytosolic, 1A, phenol-preferring, member 1	2.8.2.1,	hsa00920:Sulfur metabolism,	GO:0004062~aryl sulfotransferase activity,GO:0008146~sulfotransferase activity,GO:0016782~transferase activity, transferring sulfur-containing groups,	10720750,10762004,11154739,11156380,11207031,11219777,11470991,11535246,11692076,11739018,11804685,12162852,12165038,12402313,12419790,12419832,12455060,12468438,12469224,12471039,12477932,12725421,12761191,12814450,12867416,12867492,14520706,14618622,14642079,14643027,14648207,14688021,14871892,14973106,15090717,15093672,15122594,15318931,15377847,15383623,15455371,15489334,15516026,15604994,156…
SOD1	6647,	superoxide dismutase 1, soluble	1.15.1.1,	hsa05014:Amyotrophic lateral sclerosis (ALS),hsa05016:Huntington's disease,hsa05020:Prion diseases,	GO:0004784~superoxide dismutase activity,GO:0005507~copper ion binding,GO:0008270~zinc ion binding,GO:0016209~antioxidant activity,GO:0016721~oxidoreductase activity, acting on superoxide radicals as acceptor,GO:0019899~enzyme binding,GO:0019902~phosphatase binding,GO:0019903~protein phosphatase binding,GO:0030346~protein phosphatase 2B binding,GO:0042802~identical protein binding,GO:0042803~prot…	10329151,10400992,10430435,10439968,10631612,10677207,10732812,10735277,10809943,10830953,10837872,10889018,10920331,11006081,11220750,11350569,11369193,11457725,11513882,11527942,11535232,11561030,11675874,11756571,11771762,11854284,11854285,11912919,11930144,11951178,11996514,12039658,12050154,12099681,12126755,12127151,12138710,12144846,12145308,12210393,12213295,12215228,12218958,12270693,123…
TK1	7083,	thymidine kinase 1, soluble	2.7.1.21,	hsa00240:Pyrimidine metabolism,hsa00983:Drug metabolism,	GO:0000166~nucleotide binding,GO:0001882~nucleoside binding,GO:0001883~purine nucleoside binding,GO:0004797~thymidine kinase activity,GO:0005524~ATP binding,GO:0017076~purine nucleotide binding,GO:0019136~deoxynucleoside kinase activity,GO:0019205~nucleobase, nucleoside, nucleotide kinase activity,GO:0019206~nucleoside kinase activity,GO:0030554~adenyl nucleotide binding,GO:0032553~ribonucleotide…	10924519,11389691,11474248,11992400,12449723,12477932,12699056,1370831,14659972,14697231,14701726,14702039,14719072,15153115,15353126,15489334,15611477,15733844,15809747,15978330,16169070,16964243,16969512,17065087,17227951,17407781,1848304,18615770,18669648,18691976,19087190,19123476,2026611,2263164,2538159,3128713,3301530,3335503,3785218,6549046,8786092,9575153,
TYMP	1890,	thymidine phosphorylase	2.4.2.4,	hsa00240:Pyrimidine metabolism,hsa00983:Drug metabolism,hsa05219:Bladder cancer,	GO:0005161~platelet-derived growth factor receptor binding,GO:0008083~growth factor activity,GO:0009032~thymidine phosphorylase activity,GO:0016763~transferase activity, transferring pentosyl groups,	10472757,10493829,10591208,11041061,11297264,11733540,11920479,11925935,11957147,11986782,11992400,12174926,12177387,12429983,12466967,12477932,12520153,12565868,12639965,12684660,12813027,12820387,12824363,12918063,1400349,14571777,14702039,14702180,14719072,14966914,15069545,15123637,15201953,15254700,15262124,15289834,15374822,15375582,15474072,15489334,15571233,15571260,15571282,15607208,1570…
TYMS	7298,	thymidylate synthetase	2.1.1.45,	hsa00240:Pyrimidine metabolism,hsa00670:One carbon pool by folate,	GO:0000166~nucleotide binding,GO:0004799~thymidylate synthase activity,GO:0042083~5,10-methylenetetrahydrofolate-dependent methyltransferase activity,GO:0048037~cofactor binding,	11102983,11251009,11251164,11278511,11316879,11329255,11445856,11697906,11747337,11799066,11804689,11937185,11989786,11992400,12018454,12067974,12084458,12084459,12084460,12084461,12084462,12147691,12215845,12220503,12239455,12466474,12477932,12530000,12576451,12576452,12604405,12640689,12684695,12706868,12782596,12845668,12859954,12907731,12972956,14519634,14519641,14576935,14578129,14586640,146…
UPP1	7378,	uridine phosphorylase 1	2.4.2.3,	hsa00240:Pyrimidine metabolism,hsa00983:Drug metabolism,	GO:0004850~uridine phosphorylase activity,GO:0016763~transferase activity, transferring pentosyl groups,	11278417,11807789,12084455,12115385,12477932,14702039,15489334,16798057,19291308,7488099,752472,
UPP2	151531,	uridine phosphorylase 2	2.4.2.3,	hsa00240:Pyrimidine metabolism,hsa00983:Drug metabolism,	GO:0004850~uridine phosphorylase activity,GO:0016763~transferase activity, transferring pentosyl groups,	11278417,12477932,12849978,14702039,15489334,15815621,19401682,

## Sheet: 34genes_annotation
ID	ENTREZ_GENE_ID	Gene Name	EC_NUMBER	KEGG_PATHWAY	GOTERM_MF_FAT	PUBMED_ID
NT5C	30833	5', 3'-nucleotidase, cytosolic	3.1.3.-,3.1.3.5,	hsa00230:Purine metabolism,hsa00240:Pyrimidine metabolism,hsa00760:Nicotinate and nicotinamide metabolism,	GO:0000166~nucleotide binding,GO:0000287~magnesium ion binding,GO:0008252~nucleotidase activity,GO:0008253~5'-nucleotidase activity,GO:0016791~phosphatase activity,GO:0019103~pyrimidine nucleotide binding,GO:0043167~ion binding,GO:0043169~cation binding,GO:0046872~metal ion binding,	10681516,10899995,12234672,12418222,12477932,12714505,14702039,15136231,15489334,18669648,2157703,2833155,3186746,
NT5E	4907	5'-nucleotidase, ecto (CD73)	3.1.3.5,	hsa00230:Purine metabolism,hsa00240:Pyrimidine metabolism,hsa00760:Nicotinate and nicotinamide metabolism,	GO:0000166~nucleotide binding,GO:0005506~iron ion binding,GO:0008198~ferrous iron binding,GO:0008252~nucleotidase activity,GO:0008253~5'-nucleotidase activity,GO:0008270~zinc ion binding,GO:0016791~phosphatase activity,GO:0043167~ion binding,GO:0043169~cation binding,GO:0046872~metal ion binding,GO:0046914~transition metal ion binding,	10470109,10570953,10898423,11004484,11046060,11067892,11149913,11163406,12000134,12030367,12170585,12477932,12774669,12892649,14574404,14578500,15489334,16303743,16344560,16709165,16718268,16735966,17065075,17487388,17671792,17911479,18062933,18566412,18636315,18787389,18924612,19008478,19159218,2129526,2137649,2173922,2848759,3036115,8000038,819433,8566797,8781432,9015312,9113412,9169488,9238677…
ATIC	471	5-aminoimidazole-4-carboxamide ribonucleotide formyltransferase/IMP cyclohydrolase	2.1.2.3,3.5.4.10,	hsa00230:Purine metabolism,hsa00670:One carbon pool by folate,	GO:0003937~IMP cyclohydrolase activity,GO:0004372~glycine hydroxymethyltransferase activity,GO:0004643~phosphoribosylaminoimidazolecarboxamide formyltransferase activity,GO:0016814~hydrolase activity, acting on carbon-nitrogen (but not peptide) bonds, in cyclic amidines,	11096114,11948179,12477932,1286667,14756553,14966129,15114530,15457444,15489334,15677700,15815621,16344560,16447238,16947783,17009228,17181924,17353931,17410198,17439323,17530705,17617058,18083107,18845790,19016697,19161160,19193698,8567683,8867801,9378707,9598063,
NADSYN1	55191	NAD synthetase 1	6.3.5.1,	hsa00760:Nicotinate and nicotinamide metabolism,	GO:0000166~nucleotide binding,GO:0001882~nucleoside binding,GO:0001883~purine nucleoside binding,GO:0003952~NAD+ synthase (glutamine-hydrolyzing) activity,GO:0005524~ATP binding,GO:0016879~ligase activity, forming carbon-nitrogen bonds,GO:0016884~carbon-nitrogen ligase activity, with glutamine as amido-N-donor,GO:0017076~purine nucleotide binding,GO:0030554~adenyl nucleotide binding,GO:0032553~ri…	10737800,12477932,12547821,14702039,15231747,15489334,16189514,8125298,9373149,
APRT	353	adenine phosphoribosyltransferase	2.4.2.7,	hsa00230:Purine metabolism,	GO:0000166~nucleotide binding,GO:0001882~nucleoside binding,GO:0001883~purine nucleoside binding,GO:0002054~nucleobase binding,GO:0002055~adenine binding,GO:0002060~purine binding,GO:0003999~adenine phosphoribosyltransferase activity,GO:0016208~AMP binding,GO:0016763~transferase activity, transferring pentosyl groups,GO:0017076~purine nucleotide binding,GO:0030554~adenyl nucleotide binding,GO:003…	10369268,10479485,10481956,10937693,11243733,116697,12477932,12665801,1353080,14674717,15196008,15489334,15571218,16130169,17126311,17353931,1746557,17974005,18399692,1985452,2067530,2135300,2227951,2502918,3343350,3531209,3554238,3680503,3684585,457664,7660991,7685481,7915931,8455250,869896,8882882,8889579,9298830,9521589,
ADA	100	adenosine deaminase	3.5.4.4,	hsa00230:Purine metabolism,hsa05340:Primary immunodeficiency,	GO:0001882~nucleoside binding,GO:0001883~purine nucleoside binding,GO:0004000~adenosine deaminase activity,GO:0008270~zinc ion binding,GO:0016814~hydrolase activity, acting on carbon-nitrogen (but not peptide) bonds, in cyclic amidines,GO:0019239~deaminase activity,GO:0043167~ion binding,GO:0043169~cation binding,GO:0046872~metal ion binding,GO:0046914~transition metal ion binding,	10506947,11121182,11125033,11278278,11354825,11534018,11772392,11780052,11901152,11999881,12104097,12113294,12150791,12381379,12477932,12712614,12774669,12809673,1284479,12935677,14684150,14726805,15016824,15063762,15257174,15281007,15489334,15632314,15761857,15983379,16133068,16221767,16224193,16410722,16670267,16724628,16754522,16886895,1696926,16970880,17181544,17243920,17287605,17340203,17397…
ADH5	128	alcohol dehydrogenase 5 (class III), chi polypeptide, pseudogene 4; alcohol dehydrogenase 5 (class III), chi polypeptide	1.1.1.-,1.1.1.1,1.1.1.284,	hsa00010:Glycolysis / Gluconeogenesis,hsa00071:Fatty acid metabolism,hsa00350:Tyrosine metabolism,hsa00680:Methane metabolism,hsa00830:Retinol metabolism,hsa00980:Metabolism of xenobiotics by cytochrome P450,hsa00982:Drug metabolism,	GO:0000166~nucleotide binding,GO:0004022~alcohol dehydrogenase (NAD) activity,GO:0005504~fatty acid binding,GO:0008270~zinc ion binding,GO:0008289~lipid binding,GO:0009055~electron carrier activity,GO:0016620~oxidoreductase activity, acting on the aldehyde or oxo group of donors, NAD or NADP as acceptor,GO:0018467~formaldehyde dehydrogenase activity,GO:0031406~carboxylic acid binding,GO:0033293~m…	10661511,10978156,12004059,12141816,12196016,12477932,12484756,12604204,1446828,1453005,14608084,15489334,16169070,16201836,16605250,16685648,17185388,17543375,18095160,18331377,18636124,18996923,19165527,2679557,2818582,2934732,2936344,3365377,3365377],6375718,6424546,7948423,8460164,8494891,8503936,9018047,
AKR1A1	10327	aldo-keto reductase family 1, member A1 (aldehyde reductase)	1.1.1.2,	hsa00010:Glycolysis / Gluconeogenesis,hsa00561:Glycerolipid metabolism,	GO:0004032~aldehyde reductase activity,GO:0004033~aldo-keto reductase activity,GO:0008106~alcohol dehydrogenase (NADP+) activity,GO:0009055~electron carrier activity,GO:0047939~L-glucuronate reductase activity,	10393438,10486210,10510318,11444797,11716357,12477932,15231747,15299353,15489334,15769597,1602151,16543247,17149600,18495158,18676680,1901806,19423521,2113526,2498333,3615425,7669785,7827091,8268209,8405190,9693960,
CAD	790	carbamoyl-phosphate synthetase 2, aspartate transcarbamylase, and dihydroorotase	2.1.3.2,3.5.2.3,6.3.5.5,	hsa00240:Pyrimidine metabolism,hsa00250:Alanine, aspartate and glutamate metabolism,	GO:0000166~nucleotide binding,GO:0001882~nucleoside binding,GO:0001883~purine nucleoside binding,GO:0004070~aspartate carbamoyltransferase activity,GO:0004086~carbamoyl-phosphate synthase activity,GO:0004088~carbamoyl-phosphate synthase (glutamine-hydrolyzing) activity,GO:0004151~dihydroorotase activity,GO:0004672~protein kinase activity,GO:0005524~ATP binding,GO:0008270~zinc ion binding,GO:00165…	11854437,11986331,12438317,12477932,12746293,14523024,14559996,14743216,15324660,15326225,15489334,15621215,15890648,16155188,16959974,16964243,17081983,18187866,18669648,18679823,18691976,1979741,2565865,2885743,4092695,8619816,9525610,
CBR1	873	carbonyl reductase 1	1.1.1.184,1.1.1.189,1.1.1.197,	hsa00590:Arachidonic acid metabolism,	GO:0004090~carbonyl reductase (NADPH) activity,GO:0047021~15-hydroxyprostaglandin dehydrogenase (NADP+) activity,GO:0050221~prostaglandin-E2 9-reductase activity,	10091578,10830953,11306092,11771743,12123751,12477932,12836057,1453004,1540623,15489334,15799708,17344335,17353931,17569794,17697149,17912391,18083107,18493841,18551042,18676680,18826943,19016765,19022938,19027726,1921984,2182121,3083821,3141401,3311025,7005231,7705364,8421682,8432528,9740676,
CAT	847	catalase	1.11.1.6,	hsa00380:Tryptophan metabolism,hsa00680:Methane metabolism,hsa05014:Amyotrophic lateral sclerosis (ALS),	GO:0000166~nucleotide binding,GO:0004046~aminoacylase activity,GO:0004096~catalase activity,GO:0004601~peroxidase activity,GO:0005506~iron ion binding,GO:0016209~antioxidant activity,GO:0016684~oxidoreductase activity, acting on peroxide as acceptor,GO:0016811~hydrolase activity, acting on carbon-nitrogen (but not peptide) bonds, in linear amides,GO:0020037~heme binding,GO:0042802~identical prote…	10096042,10488055,10567403,10656833,10666617,10960480,11106583,11134921,11182520,11313354,11479740,11728823,11729237,11837458,11907164,12032677,12110367,12165738,12231449,12372460,12447480,12468545,12469627,12477932,12487379,12516882,12603857,12606529,12665801,12730222,12777400,12824748,12838770,12950161,14580687,14702039,14710363,14962975,14975589,15125229,15131792,15133753,15182856,15203188,154…
CEPT1	10390	choline/ethanolamine phosphotransferase 1	2.7.8.1,2.7.8.2,		GO:0000287~magnesium ion binding,GO:0004142~diacylglycerol cholinephosphotransferase activity,GO:0004307~ethanolaminephosphotransferase activity,GO:0016780~phosphotransferase activity, for other substituted phosphate groups,GO:0017169~CDP-alcohol phosphatidyltransferase activity,GO:0030145~manganese ion binding,GO:0043167~ion binding,GO:0043169~cation binding,GO:0046872~metal ion binding,GO:00469…	10191259,10893425,12216837,12221122,12477932,14702039,15489334,16710414,17974005,18691976,
CMPK1	51727	cytidine monophosphate (UMP-CMP) kinase 1, cytosolic	2.7.4.14,	hsa00240:Pyrimidine metabolism,	GO:0000166~nucleotide binding,GO:0001882~nucleoside binding,GO:0001883~purine nucleoside binding,GO:0004127~cytidylate kinase activity,GO:0004849~uridine kinase activity,GO:0005524~ATP binding,GO:0016776~phosphotransferase activity, phosphate group as acceptor,GO:0017076~purine nucleotide binding,GO:0019201~nucleotide kinase activity,GO:0019205~nucleobase, nucleoside, nucleotide kinase activity,G…	10462544,10931946,11681623,11912132,12477932,12694191,1286669,15163660,15489334,15550676,15606899,16710414,17608725,8125298,8313870,9373149,
DCTD	1635	dCMP deaminase	3.5.4.12,	hsa00240:Pyrimidine metabolism,	GO:0004132~dCMP deaminase activity,GO:0008270~zinc ion binding,GO:0016814~hydrolase activity, acting on carbon-nitrogen (but not peptide) bonds, in cyclic amidines,GO:0019239~deaminase activity,GO:0043167~ion binding,GO:0043169~cation binding,GO:0046872~metal ion binding,GO:0046914~transition metal ion binding,	12477932,15489334,15592455,17602053,3627112,7642519,7685356,8448179,
DCK	1633	deoxycytidine kinase	2.7.1.74,	hsa00230:Purine metabolism,hsa00240:Pyrimidine metabolism,	GO:0000166~nucleotide binding,GO:0000287~magnesium ion binding,GO:0001882~nucleoside binding,GO:0001883~purine nucleoside binding,GO:0001884~pyrimidine nucleoside binding,GO:0004137~deoxycytidine kinase activity,GO:0005524~ATP binding,GO:0008144~drug binding,GO:0017076~purine nucleotide binding,GO:0019136~deoxynucleoside kinase activity,GO:0019205~nucleobase, nucleoside, nucleotide kinase activit…	11687801,11830489,11952160,12477932,12535661,12628850,12808445,14514691,14702039,15028279,15489334,15561147,15564883,15571255,15571257,15571258,15571259,15978330,16169070,16361699,16401075,16421443,16799820,16969512,17065053,17065079,17065080,17065085,17065091,17530837,17602053,17855478,18258203,18361501,18600530,18600545,18669648,18691976,18775979,18974616,19428333,1996353,2013338,2542307,631506…
DHFR	1719	dihydrofolate reductase	1.5.1.3,	hsa00670:One carbon pool by folate,hsa00790:Folate biosynthesis,	GO:0000166~nucleotide binding,GO:0004146~dihydrofolate reductase activity,GO:0016645~oxidoreductase activity, acting on the CH-NH group of donors,GO:0016646~oxidoreductase activity, acting on the CH-NH group of donors, NAD or NADP as acceptor,GO:0048037~cofactor binding,GO:0050661~NADP or NADPH binding,GO:0050662~coenzyme binding,	10749676,10898545,11448909,11779239,11964483,11996001,12084458,12096917,12384595,12477932,12588981,12612070,12657784,12788094,12812497,12925791,14664697,14679136,14735580,15039552,15489334,15755837,15817466,16116078,16124424,16467096,16735474,16969375,17237763,1731871,17336564,17413111,17449906,17486595,17597297,17683969,17917571,18045573,18056255,18093916,18247058,18451149,18498051,18636124,1867…
DPYD	1806	dihydropyrimidine dehydrogenase	1.3.1.2,	hsa00240:Pyrimidine metabolism,hsa00410:beta-Alanine metabolism,hsa00770:Pantothenate and CoA biosynthesis,hsa00983:Drug metabolism,	GO:0000166~nucleotide binding,GO:0001882~nucleoside binding,GO:0001883~purine nucleoside binding,GO:0004152~dihydroorotate dehydrogenase activity,GO:0004158~dihydroorotate oxidase activity,GO:0004159~dihydrouracil dehydrogenase (NAD+) activity,GO:0005506~iron ion binding,GO:0009055~electron carrier activity,GO:0016628~oxidoreductase activity, acting on the CH-CH group of donors, NAD or NADP as ac…	10410956,10606257,10923099,11072080,11267945,11555601,11862480,11895907,11988088,11992400,12025228,12047484,12209976,12360106,12477932,12576451,12822071,12844478,12851836,14519634,14562021,14654904,14702039,14702180,15017333,15025795,15069545,15102667,1512248,15132136,15254700,15316940,1544906,15489334,15709212,15939134,15993511,15999119,16021908,16132996,16328315,16344560,16361556,16710414,16771…
GCLC	2729	glutamate-cysteine ligase, catalytic subunit	6.3.2.2,	hsa00480:Glutathione metabolism,	GO:0000166~nucleotide binding,GO:0000287~magnesium ion binding,GO:0001882~nucleoside binding,GO:0001883~purine nucleoside binding,GO:0004357~glutamate-cysteine ligase activity,GO:0005524~ATP binding,GO:0016595~glutamate binding,GO:0016597~amino acid binding,GO:0016879~ligase activity, forming carbon-nitrogen bonds,GO:0016881~acid-amino acid ligase activity,GO:0017076~purine nucleotide binding,GO:…	10395918,10439045,10515893,10733484,11444867,11820781,11844594,11972604,12070177,12477932,12500194,12598062,12663448,1350904,14574404,14676828,14702039,15451055,15485876,15489334,16183645,16322067,16403949,16491484,16599007,16690975,16766924,17109620,17207022,17333241,17344309,17479437,17601350,17643973,17921251,17961430,18035085,18066575,18276794,18420959,18549827,18560528,18614560,18926903,1897…
GMPS	8833	guanine monphosphate synthetase	6.3.5.2,	hsa00230:Purine metabolism,hsa00983:Drug metabolism,	GO:0000166~nucleotide binding,GO:0001882~nucleoside binding,GO:0001883~purine nucleoside binding,GO:0003921~GMP synthase activity,GO:0003922~GMP synthase (glutamine-hydrolyzing) activity,GO:0005524~ATP binding,GO:0016879~ligase activity, forming carbon-nitrogen bonds,GO:0016884~carbon-nitrogen ligase activity, with glutamine as amido-N-donor,GO:0017076~purine nucleotide binding,GO:0019899~enzyme …	11110714,12477932,15489334,16236267,17924679,18187866,6698284,7559506,7706277,8089153,8125298,9195163,9373149,
HPRT1	3251	hypoxanthine phosphoribosyltransferase 1	2.4.2.8,	hsa00230:Purine metabolism,hsa00983:Drug metabolism,	GO:0000287~magnesium ion binding,GO:0002054~nucleobase binding,GO:0002060~purine binding,GO:0004422~hypoxanthine phosphoribosyltransferase activity,GO:0016763~transferase activity, transferring pentosyl groups,GO:0042802~identical protein binding,GO:0042803~protein homodimerization activity,GO:0043167~ion binding,GO:0043169~cation binding,GO:0046872~metal ion binding,GO:0046983~protein dimerizati…	10338013,10360366,11219770,11434773,11591653,11668636,11714443,11891689,12175903,12376523,12477932,12616531,12874812,1301916,14499622,14702039,14767555,1487231,15146465,15178494,15204312,15277709,15489334,15491638,1551676,15571220,15571222,15571223,15571224,15601998,15772651,15779006,15862283,15862284,15987524,15990111,16138897,16189514,16216473,16240158,16355393,16458330,16928426,16951156,170273…
MPO	4353	myeloperoxidase	1.11.1.7,		GO:0003682~chromatin binding,GO:0004601~peroxidase activity,GO:0005506~iron ion binding,GO:0005509~calcium ion binding,GO:0016209~antioxidant activity,GO:0016684~oxidoreductase activity, acting on peroxide as acceptor,GO:0020037~heme binding,GO:0043167~ion binding,GO:0043169~cation binding,GO:0046872~metal ion binding,GO:0046906~tetrapyrrole binding,GO:0046914~transition metal ion binding,	10766826,10772654,10777476,10801811,10828600,11087769,11090610,11147929,11161635,11179831,11423389,11434421,11705390,11774269,11794452,11811524,11813987,11840286,11861298,11895912,11943609,11960308,11981455,11986950,12027420,12052532,12057865,12089442,12111688,12135010,12164325,12209361,12355548,12393699,12397651,12432558,12460800,12496042,12496043,12515618,12565898,12606047,12694338,12707270,127…
NOS1	4842	nitric oxide synthase 1 (neuronal)	1.14.13.39,	hsa00330:Arginine and proline metabolism,hsa04020:Calcium signaling pathway,hsa04730:Long-term depression,hsa05010:Alzheimer's disease,hsa05014:Amyotrophic lateral sclerosis (ALS),	GO:0000166~nucleotide binding,GO:0001882~nucleoside binding,GO:0001883~purine nucleoside binding,GO:0004517~nitric-oxide synthase activity,GO:0005506~iron ion binding,GO:0005516~calmodulin binding,GO:0009055~electron carrier activity,GO:0010181~FMN binding,GO:0016597~amino acid binding,GO:0017076~purine nucleotide binding,GO:0020037~heme binding,GO:0030554~adenyl nucleotide binding,GO:0031406~car…	10068656,10187848,10203575,10221915,10400690,10443886,10488080,10518591,10681501,10824095,10874031,11043403,11052978,11086993,11112111,11284722,11404282,11511520,11525805,11546971,11590170,11591728,11668616,11747091,11786430,11849436,11849441,11867766,11890749,11960979,12081486,12081996,12140778,12210288,12237228,12403769,12421162,12445599,12477932,12485841,12490535,12531780,12572877,12630910,126…
NME2	4831	non-metastatic cells 1, protein (NM23A) expressed in; NME1-NME2 readthrough transcript; non-metastatic cells 2, protein (NM23B) expressed in	2.7.4.6,	hsa00230:Purine metabolism,hsa00240:Pyrimidine metabolism,	GO:0000166~nucleotide binding,GO:0000287~magnesium ion binding,GO:0001882~nucleoside binding,GO:0001883~purine nucleoside binding,GO:0003677~DNA binding,GO:0003700~transcription factor activity,GO:0004518~nuclease activity,GO:0004536~deoxyribonuclease activity,GO:0004550~nucleoside diphosphate kinase activity,GO:0005524~ATP binding,GO:0005525~GTP binding,GO:0008092~cytoskeletal protein binding,GO…	10512675,10602478,10611312,10618642,11042679,11082283,11274357,11280768,11319942,11555662,11687967,11726210,11776896,11835509,11872741,11918081,11919189,11935309,11960382,11963831,11998956,12007505,12009894,12105213,12135660,12137595,12163590,12174914,12200143,12405283,12452062,12474051,12477932,12486122,12486123,12490715,12524539,12601555,12624546,12628186,12669312,12684753,12859952,12883690,129…
PCYT2	5833	phosphate cytidylyltransferase 2, ethanolamine	2.7.7.14,	hsa00564:Glycerophospholipid metabolism,	GO:0004306~ethanolamine-phosphate cytidylyltransferase activity,GO:0016779~nucleotidyltransferase activity,GO:0070567~cytidylyltransferase activity,	12477932,14702039,15489334,16023412,16189514,18583706,9083101,9370320,
PGD	5226	phosphogluconate dehydrogenase	1.1.1.44,	hsa00030:Pentose phosphate pathway,hsa00480:Glutathione metabolism,	GO:0000166~nucleotide binding,GO:0004616~phosphogluconate dehydrogenase (decarboxylating) activity,GO:0048037~cofactor binding,GO:0050661~NADP or NADPH binding,GO:0050662~coenzyme binding,	12477932,12498092,15231747,15489334,2283141,3858849,3864603,3932573,4517931,8978909,9920387,
PFAS	5198	phosphoribosylformylglycinamidine synthase	6.3.5.3,	hsa00230:Purine metabolism,	GO:0000166~nucleotide binding,GO:0001882~nucleoside binding,GO:0001883~purine nucleoside binding,GO:0004642~phosphoribosylformylglycinamidine synthase activity,GO:0005524~ATP binding,GO:0016879~ligase activity, forming carbon-nitrogen bonds,GO:0016884~carbon-nitrogen ligase activity, with glutamine as amido-N-donor,GO:0017076~purine nucleotide binding,GO:0030554~adenyl nucleotide binding,GO:00325…	10548741,12477932,15489334,17081983,17353931,8110788,9205841,9328467,
PCCB	5096	propionyl Coenzyme A carboxylase, beta polypeptide	6.4.1.3,	hsa00280:Valine, leucine and isoleucine degradation,hsa00640:Propanoate metabolism,	GO:0000166~nucleotide binding,GO:0001882~nucleoside binding,GO:0001883~purine nucleoside binding,GO:0004658~propionyl-CoA carboxylase activity,GO:0005524~ATP binding,GO:0016885~ligase activity, forming carbon-carbon bonds,GO:0017076~purine nucleotide binding,GO:0030554~adenyl nucleotide binding,GO:0032553~ribonucleotide binding,GO:0032555~purine ribonucleotide binding,GO:0032559~adenyl ribonucleo…	10447268,10502773,11749052,12007220,12189489,12477932,12559849,12757933,14671302,15059621,15489334,16344560,17051315,2154743,240144,2587127,2895916,3460076,6245185,7092804,8125298,8188292,8225321,8411997,9373149,9683601,
PDXP	57026	pyridoxal (pyridoxine, vitamin B6) phosphatase	3.1.3.74,	hsa00750:Vitamin B6 metabolism,	GO:0000287~magnesium ion binding,GO:0016791~phosphatase activity,GO:0033883~pyridoxal phosphatase activity,GO:0043167~ion binding,GO:0043169~cation binding,GO:0046872~metal ion binding,	10591208,12477932,14522954,14702039,15489334,15580268,18029348,18058037,18510874,19000834,8132548,
PNPO	55163	pyridoxamine 5'-phosphate oxidase	1.4.3.5,	hsa00750:Vitamin B6 metabolism,	GO:0000166~nucleotide binding,GO:0004733~pyridoxamine-phosphate oxidase activity,GO:0010181~FMN binding,GO:0016638~oxidoreductase activity, acting on the CH-NH2 group of donors,GO:0016641~oxidoreductase activity, acting on the CH-NH2 group of donors, oxygen as acceptor,GO:0048037~cofactor binding,GO:0050662~coenzyme binding,	12477932,12824491,14702039,15182361,15489334,15772097,16344560,17287340,17851041,18485777,8125298,8889548,9373149,9601034,
SLC29A1	2030	solute carrier family 29 (nucleoside transporters), member 1			GO:0005337~nucleoside transmembrane transporter activity,GO:0015932~nucleobase, nucleoside, nucleotide and nucleic acid transmembrane transporter activity,	10755314,11584005,11814344,12006583,12008078,12097333,12384580,12389626,12477932,12527552,12820662,14574404,14607828,14667819,14702039,14759222,15489334,15529184,15557207,15632314,15649894,15933265,16333246,16344560,16595656,16609362,16688763,16818266,16818276,16858130,16959974,17162590,17409283,17658213,17921321,17926640,18064606,18187485,18462193,18600541,18635603,18669648,18703227,19116148,191…
SRM	6723	spermidine synthase	2.5.1.16,	hsa00270:Cysteine and methionine metabolism,hsa00330:Arginine and proline metabolism,hsa00410:beta-Alanine metabolism,hsa00480:Glutathione metabolism,	GO:0004766~spermidine synthase activity,GO:0016765~transferase activity, transferring alkyl or aryl (other than methyl) groups,	12477932,15489334,17585781,2069720,2344393,2730590,3248683,3481684,7629810,7774716,8343131,9020892,
SOD1	6647	superoxide dismutase 1, soluble	1.15.1.1,	hsa05014:Amyotrophic lateral sclerosis (ALS),hsa05016:Huntington's disease,hsa05020:Prion diseases,	GO:0004784~superoxide dismutase activity,GO:0005507~copper ion binding,GO:0008270~zinc ion binding,GO:0016209~antioxidant activity,GO:0016721~oxidoreductase activity, acting on superoxide radicals as acceptor,GO:0019899~enzyme binding,GO:0019902~phosphatase binding,GO:0019903~protein phosphatase binding,GO:0030346~protein phosphatase 2B binding,GO:0042802~identical protein binding,GO:0042803~prot…	10329151,10400992,10430435,10439968,10631612,10677207,10732812,10735277,10809943,10830953,10837872,10889018,10920331,11006081,11220750,11350569,11369193,11457725,11513882,11527942,11535232,11561030,11675874,11756571,11771762,11854284,11854285,11912919,11930144,11951178,11996514,12039658,12050154,12099681,12126755,12127151,12138710,12144846,12145308,12210393,12213295,12215228,12218958,12270693,123…
TYMP	1890	thymidine phosphorylase	2.4.2.4,	hsa00240:Pyrimidine metabolism,hsa00983:Drug metabolism,hsa05219:Bladder cancer,	GO:0005161~platelet-derived growth factor receptor binding,GO:0008083~growth factor activity,GO:0009032~thymidine phosphorylase activity,GO:0016763~transferase activity, transferring pentosyl groups,	10472757,10493829,10591208,11041061,11297264,11733540,11920479,11925935,11957147,11986782,11992400,12174926,12177387,12429983,12466967,12477932,12520153,12565868,12639965,12684660,12813027,12820387,12824363,12918063,1400349,14571777,14702039,14702180,14719072,14966914,15069545,15123637,15201953,15254700,15262124,15289834,15374822,15375582,15474072,15489334,15571233,15571260,15571282,15607208,1570…
TYMS	7298	thymidylate synthetase	2.1.1.45,	hsa00240:Pyrimidine metabolism,hsa00670:One carbon pool by folate,	GO:0000166~nucleotide binding,GO:0004799~thymidylate synthase activity,GO:0042083~5,10-methylenetetrahydrofolate-dependent methyltransferase activity,GO:0048037~cofactor binding,	11102983,11251009,11251164,11278511,11316879,11329255,11445856,11697906,11747337,11799066,11804689,11937185,11989786,11992400,12018454,12067974,12084458,12084459,12084460,12084461,12084462,12147691,12215845,12220503,12239455,12466474,12477932,12530000,12576451,12576452,12604405,12640689,12684695,12706868,12782596,12845668,12859954,12907731,12972956,14519634,14519641,14576935,14578129,14586640,146…

## Sheet: 77genes_drugs
Drug Targets	Drugs
GLS2	DB00130
ADH5	DB00157
NOS1	DB00997
HPRT1	DB00352
SAT1	DB00127
APRT	DB00131
ALDH2	DB00435; DB00727; DB01612; DB06770
GCLC	DB00163
PNPO	DB02209
NDUFS3	DB00997
ASNS	DB00130
CHKB	DB00122
NOS3	DB00997
CCBL1	DB00130
SAT2	DB00127
SRM	DB00118
MAT2A	DB00134
NDUFS7	DB00997
GMPS	DB00130
TYMS	DB00544; DB00563
DHFR	DB00563; DB08878
AMPD1	DB00131
ADH4	DB00157
MAT1A	DB00134
ADH7	DB00157
PCCB	DB00161
PCYT1A	DB00709
CMPK1	DB00709
PLA2G4A	DB00041; DB00086; DB00411; DB00445; DB00578; DB00591; DB01083; DB04786; DB04827; DB05029
IDO1	DB00150; DB01065
FPGS	DB00563; DB06813
NDUFS2	DB00997
CHKA	DB00122
GSTM1	DB00515; DB00526; DB00958; DB00993; DB01008
GLS	DB00130
CYP51A1	DB01026; DB01153
SULT1A1	DB00316; DB00675
SULT1E1	DB00316
DPYD	DB00544; DB01101
MPO	DB00006; DB00062; DB00104; DB00208; DB00233; DB00250; DB00461; DB00500; DB00515; DB00526; DB00550; DB00833; DB00847; DB00958; DB01065; DB01225; DB02300; DB04827; DB05161
NT5E	DB00987
SLC29A1	DB00642
ATIC	DB00563
TK1	DB00432; DB00495
CAT	DB00446; DB00878
COMT	DB00255; DB00286; DB00494; DB00841; DB00968; DB00988; DB01141; DB01420
MTHFR	DB00134; DB00140; DB00158; DB00170; DB00542; DB00544; DB00563
MAT2B	DB00134
CEPT1	DB00122
TYMP	DB00322; DB00369; DB00432; DB00544; DB01101; DB02631
ADA	DB00194; DB00277; DB00640; DB00974; DB01280; DB05057
CAD	DB00130
PFAS	DB00130
GLUL	DB00082; DB00134; DB00466; DB01119; DB01212; DB08794
NADSYN1	DB00130
CYP2D6	DB00091; DB00169; DB00175; DB00176; DB00182; DB00184; DB00185; DB00188; DB00191; DB00193; DB00195; DB00201; DB00203; DB00205; DB00208; DB00209; DB00211; DB00215; DB00216; DB00220; DB00224; DB00227; DB00234; DB00238; DB00243; DB00245; DB00246; DB00257; DB00259; DB00264; DB00268; DB00276; DB00277; DB00281; DB00283; DB00285; DB00289; DB00295; DB00296; DB00297; DB00316; DB00317; DB00318; DB00321; DB0…
SOD1	DB00163; DB00515; DB00526; DB00958
CDA	DB00441; DB00928; DB00987; DB01101; DB03185
UPP1	DB00544
UPP2	DB00544
DCK	DB00242; DB00441; DB00631; DB00642; DB00709; DB00879; DB00943; DB00987; DB01262; DB01280; DB02594; DB04961
CBR1	DB00414; DB00502; DB00997; DB01046; DB03556; DB04463; DB04844; DB05197
ARSA	DB01141; DB03821; DB04786
NME2	DB00300; DB00709; DB00718
ADK	DB00171; DB00640; DB00811; DB01048
ADH6	DB00157; DB01048
ALPL	DB01143; DB06716
PGD	DB00563; DB00695; DB00814; DB00867
DGUOK	DB01280
AKR1A1	DB00157; DB00997
PGK1	DB00709
AK2	DB00300; DB00718
DCTD	DB00987
CES2	DB00688; DB00762; DB06209; DB06695
PDXP	DB02209
PCYT2	DB00709
NT5C	DB00709

## Sheet: 34genes_drug
Drug Targets	Drugs
NT5C	DB00709
NT5E	DB00987
ATIC	DB00563
NADSYN1	DB00130
APRT	DB00131
ADA	DB00194; DB00277; DB00640; DB00974; DB01280; DB05057
ADH5	DB00157
AKR1A1	DB00157; DB00997
CAD	DB00130
CBR1	DB00414; DB00502; DB00997; DB01046; DB03556; DB04463; DB04844; DB05197
CAT	DB00446; DB00878
CEPT1	DB00122
CMPK1	DB00709
DCTD	DB00987
DCK	DB00242; DB00441; DB00631; DB00642; DB00709; DB00879; DB00943; DB00987; DB01262; DB01280; DB02594; DB04961
DHFR	DB00563; DB08878
DPYD	DB00544; DB01101
GCLC	DB00163
GMPS	DB00130
HPRT1	DB00352
MPO	DB00006; DB00062; DB00104; DB00208; DB00233; DB00250; DB00461; DB00500; DB00515; DB00526; DB00550; DB00833; DB00847; DB00958; DB01065; DB01225; DB02300; DB04827; DB05161
NOS1	DB00997
NME2	DB00300; DB00709; DB00718
PCYT2	DB00709
PGD	DB00563; DB00695; DB00814; DB00867
PFAS	DB00130
PCCB	DB00161
PDXP	DB02209
PNPO	DB02209
SLC29A1	DB00642
SRM	DB00118
SOD1	DB00163; DB00515; DB00526; DB00958
TYMP	DB00322; DB00369; DB00432; DB00544; DB01101; DB02631
TYMS	DB00544; DB00563
