# Supplementary material for: Genome-wide metabolic model to improve understanding of CD4+ T cell metabolism, immunometabolism and application in drug design
Source: Royal Society of Chemistry journal article supplement (doi:10.1039/c5mb00480b), 2015-11-18
Supplement: c5mb00480b1.zip [file supplementary_Table_8-side_effects_of_enzymic_drugs.xlsx]

## Sheet: EDT_sider2
cd4 EDT in sider2		EDT with side effect data in sider2
ADEFOVIR DIPIVOXIL		ADENOSINE
ADENOSINE		CYTARABINE
BIVALIRUDIN		ENOXAPARIN
CALCIPOTRIOL		DOXORUBICIN
CAPECITABINE		THEOPHYLLINE
CARBOPLATIN		CEFACLOR
CEFACLOR		CHLORHEXIDINE
CISPLATIN		DAPSONE
CLADRIBINE		FLUOROURACIL
CYTARABINE		GEMCITABINE
EMTRICITABINE		HALOPERIDOL
FLUOROURACIL		LAMIVUDINE
FUROSEMIDE		MELOXICAM
GEMCITABINE		NABUMETONE
HALOPERIDOL		OXALIPLATIN
LAMIVUDINE		TOLMETIN
MELOXICAM		TETRABENAZINE
METHOTREXATE		CYSTEAMINE
NABUMETONE		DECITABINE
NELARABINE		CARBOPLATIN
OXALIPLATIN		OCTREOTIDE
PROPYLTHIOURACIL		CIDOFOVIR
TETRABENAZINE		ADEFOVIR DIPIVOXIL
TRIFLURIDINE		EMTRICITABINE
AMINOSALICYLIC ACID		CAPECITABINE
CHLORHEXIDINE		NELARABINE
CLOFARABINE		LUBIPROSTONE
CYSTEAMINE		BIVALIRUDIN
DAPSONE
DECITABINE
DOXORUBICIN
EDETIC ACID
ENOXAPARIN
FLOXURIDINE
LUBIPROSTONE
OCTREOTIDE
THEOPHYLLINE
TICLOPIDINE
TOLMETIN
PEMETREXED
CHLORAMPHENICOL
ZALCITABINE
CIDOFOVIR

## Sheet: 18drugs_357siders
drug name	drugid in sider2	side effect name	frequency percent	frequency
DOXORUBICIN	-100001690	Rash	0.003	0.003
DOXORUBICIN	-100001690	Infection	0.006	0.006
CAPECITABINE	-100060953	Abdominal Pain	0.01	0
NELARABINE	-100096312	Abdominal pain	0.01	0.01
CAPECITABINE	-100060953	Chest Pain	0.01	0.01
CAPECITABINE	-100060953	Chest Pain	0.01	0
NELARABINE	-100096312	chest pain	0.01	0.01
CAPECITABINE	-100060953	Dermatitis	0.01	0.01
NELARABINE	-100096312	Infection	0.01	0.01
DAPSONE	-100002955	Influenza	0.01	0.01
CARBOPLATIN	-100038904	Mucositis	0.01	0.01
LAMIVUDINE	-100003877	Pain	0.01	0
CAPECITABINE	-100060953	Pain	0.01	0
CAPECITABINE	-100060953	Pain	0.01	0.01
NELARABINE	-100096312	Pain	0.01	0.01
NELARABINE	-100096312	Pain in extremity	0.01	0.01
CAPECITABINE	-100060953	Pain in Limb	0.01	0.01
DAPSONE	-100002955	Pruritus	0.01	0.01
DAPSONE	-100002955	Sinusitis	0.01	0.01
NELARABINE	-100096312	Sinusitis	0.01	0.01
DAPSONE	-100002955	Sinusitis NOS	0.01	0.01
CAPECITABINE	-100060953	Stomatitis	0.01	0
CAPECITABINE	-100060953	Stomatitis	0.01	0.01
NELARABINE	-100096312	Stomatitis	0.01	0.01
DOXORUBICIN	-100001690	Conjunctivitis	0.011	0.011
DOXORUBICIN	-100001690	keratitis	0.011	0.011
FLUOROURACIL	-100003385	Allergy	0.0117	0.0116732
FLUOROURACIL	-100003385	Allergy	0.0118	0.0117647
FLUOROURACIL	-100003385	Allergy	0.012	0.012
DOXORUBICIN	-100001690	Oral Moniliasis	0.013	0.013
DOXORUBICIN	-100001690	Oral Moniliasis	0.013	0.012987
DOXORUBICIN	-100001690	Rash	0.014	0.014
FLUOROURACIL	-100003385	Sinusitis	0.0156	0.0155642
FLUOROURACIL	-100003385	Allergy	0.0157	0.015748
FLUOROURACIL	-100003385	Infection	0.0157	0.015748
FLUOROURACIL	-100003385	Sinusitis	0.0157	0.015748
FLUOROURACIL	-100003385	Allergy	0.016	0.016
DOXORUBICIN	-100001690	Infection	0.016	0.016
FLUOROURACIL	-100003385	Infection	0.016	0.016
FLUOROURACIL	-100003385	Sinusitis	0.016	0.016
DOXORUBICIN	-100001690	Mucositis	0.019	0.019
CYTARABINE	-100000596	Back pain	0.02	0.02
CAPECITABINE	-100060953	Back Pain	0.02	0.02
NELARABINE	-100096312	Infection	0.02	0.02
CYTARABINE	-100000596	pain	0.02	0.02
ENOXAPARIN	-100000772	Pain	0.02	0.02
CAPECITABINE	-100060953	Pain	0.02	0.02
LUBIPROSTONE	-100157920	pain	0.02	0.02
DAPSONE	-100002955	Pharyngitis	0.02	0.02
CYTARABINE	-100000596	Pruritus	0.02	0.02
CYTARABINE	-100000596	Pruritus NOS	0.02	0.02
DAPSONE	-100002955	Sinusitis	0.02	0.02
DAPSONE	-100002955	Sinusitis NOS	0.02	0.02
CAPECITABINE	-100060953	Stomatitis	0.02	0.02
FLUOROURACIL	-100003385	Allergy	0.023	0.0229885
FLUOROURACIL	-100003385	Allergy	0.023	0.023
LUBIPROSTONE	-100157920	Abdominal pain	0.03	0.03
CYTARABINE	-100000596	Inflammation	0.03	0.03
CYTARABINE	-100000596	Inflammation NOS	0.03	0.03
CYTARABINE	-100000596	Lymphoma	0.03	0.03
CYTARABINE	-100000596	Lymphoma NOS	0.03	0.03
CYTARABINE	-100000596	Mucosal Inflammation	0.03	0.03
CYTARABINE	-100000596	Mucosal Inflammation NOS	0.03	0.03
EMTRICITABINE	-100060877	Neuritis	0.03	0.03
CYTARABINE	-100000596	Pain	0.03	0.03
NELARABINE	-100096312	Pain	0.03	0.03
LUBIPROSTONE	-100157920	pain	0.03	0.03
CAPECITABINE	-100060953	Abdominal Pain	0.04	0.04
EMTRICITABINE	-100060877	Neuritis	0.04	0.04
CAPECITABINE	-100060953	Pain	0.04	0.04
FLUOROURACIL	-100003385	Sinusitis	0.047	0.047
FLUOROURACIL	-100003385	Sinusitis	0.0471	0.0470588
LUBIPROSTONE	-100157920	Abdominal pain	0.05	0.05
NELARABINE	-100096312	Chest pain	0.05	0.05
NELARABINE	-100096312	Infection	0.05	0.05
LAMIVUDINE	-100003877	infections	0.05	0.05
CARBOPLATIN	-100038904	Infections	0.05	0.05
DAPSONE	-100002955	Nasopharyngitis	0.05	0.05
NELARABINE	-100096312	pain	0.05	0.05
LUBIPROSTONE	-100157920	pain	0.05	0.05
LAMIVUDINE	-100003877	rashes	0.05	0.05
DECITABINE	-100016886	Pain	0.0505	0.0505051
DOXORUBICIN	-100001690	Stomatitis	0.0519	0.0519481
DOXORUBICIN	-100001690	Stomatitis	0.052	0.052
DOXORUBICIN	-100001690	Oral Moniliasis	0.055	0.055
FLUOROURACIL	-100003385	Pain	0.055	0.055
DOXORUBICIN	-100001690	Pharyngitis	0.055	0.055
FLUOROURACIL	-100003385	Pain	0.0551	0.0551181
DOXORUBICIN	-100001690	Oral Moniliasis	0.0553	0.0553191
CAPECITABINE	-100060953	Chest Pain	0.06	0.06
DAPSONE	-100002955	Nasopharyngitis	0.06	0.06
CAPECITABINE	-100060953	Pain	0.06	0.06
CAPECITABINE	-100060953	Pain in Limb	0.06	0.06
LAMIVUDINE	-100003877	rashes	0.06	0.06
LAMIVUDINE	-100003877	Stomatitis	0.06	0.06
DECITABINE	-100016886	Abdominal pain	0.0606	0.0606061
DECITABINE	-100016886	Abdominal pain upper	0.0606	0.0606061
DECITABINE	-100016886	Bone pain	0.0606	0.0606061
DECITABINE	-100016886	candidiasis	0.0606	0.0606061
DECITABINE	-100016886	Chest pain	0.0606	0.0606061
DECITABINE	-100016886	pain	0.0606	0.0606061
DECITABINE	-100016886	Sinusitis	0.0606	0.0606061
DOXORUBICIN	-100001690	Stomatitis	0.068	0.068
DOXORUBICIN	-100001690	Stomatitis	0.0681	0.0680851
CYTARABINE	-100000596	Back pain	0.07	0.07
CYTARABINE	-100000596	Inflammation	0.07	0.07
CYTARABINE	-100000596	Inflammation NOS	0.07	0.07
CYTARABINE	-100000596	Mucosal Inflammation	0.07	0.07
CYTARABINE	-100000596	Mucosal Inflammation NOS	0.07	0.07
CYTARABINE	-100000596	pain	0.07	0.07
NELARABINE	-100096312	Pain	0.07	0.07
NELARABINE	-100096312	Pain in extremity	0.07	0.07
NELARABINE	-100096312	Sinusitis	0.07	0.07
CAPECITABINE	-100060953	Stomatitis	0.07	0.07
DECITABINE	-100016886	infection	0.0707	0.0707071
DOXORUBICIN	-100001690	Pain	0.072	0.072
CYTARABINE	-100000596	Pain	0.0769	0.0769231
DOXORUBICIN	-100001690	Abdominal Pain	0.08	0.08
EMTRICITABINE	-100060877	Abdominal Pain	0.08	0.08
LUBIPROSTONE	-100157920	Abdominal pain	0.08	0.08
NELARABINE	-100096312	Back pain	0.08	0.08
CARBOPLATIN	-100038904	Mucositis	0.08	0.08
DOXORUBICIN	-100001690	Pain	0.08	0.08
EMTRICITABINE	-100060877	Pain	0.08	0.08
NELARABINE	-100096312	pain	0.08	0.08
LUBIPROSTONE	-100157920	pain	0.08	0.08
NELARABINE	-100096312	Stomatitis	0.08	0.08
DECITABINE	-100016886	pain	0.0808	0.0808081
DOXORUBICIN	-100001690	Mucositis	0.089	0.089
DOXORUBICIN	-100001690	Rash	0.089	0.089
CYTARABINE	-100000596	Abdominal Pain	0.09	0.09
LAMIVUDINE	-100003877	Abdominal pain	0.09	0.09
ADEFOVIR DIPIVOXIL	-100060871	Abdominal pain	0.09	0.09
CAPECITABINE	-100060953	Abdominal Pain	0.09	0.09
NELARABINE	-100096312	Abdominal pain	0.09	0.09
CYTARABINE	-100000596	Abdominal Pain NOS	0.09	0.09
CAPECITABINE	-100060953	Back Pain	0.09	0.09
NELARABINE	-100096312	Infection	0.09	0.09
LAMIVUDINE	-100003877	Lymphadenopathy	0.09	0.09
CYTARABINE	-100000596	Pain	0.09	0.09
LAMIVUDINE	-100003877	pain	0.09	0.09
ADEFOVIR DIPIVOXIL	-100060871	pain	0.09	0.09
CAPECITABINE	-100060953	Pain	0.09	0.09
NELARABINE	-100096312	pain	0.09	0.09
CYTARABINE	-100000596	Pain NOS	0.09	0.09
LAMIVUDINE	-100003877	rashes	0.09	0.09
DECITABINE	-100016886	Cellulitis	0.0909	0.0909091
DECITABINE	-100016886	inflammation	0.0909	0.0909091
DECITABINE	-100016886	Mucosal inflammation	0.0909	0.0909091
DECITABINE	-100016886	Pruritus	0.0909	0.0909091
DOXORUBICIN	-100001690	Mucositis	0.093	0.093
CAPECITABINE	-100060953	Back Pain	0.1	0.1
LAMIVUDINE	-100003877	pain	0.1	0.1
CAPECITABINE	-100060953	Pain	0.1	0.1
EMTRICITABINE	-100060877	Rhinitis	0.1	0.1
DECITABINE	-100016886	infection	0.101	0.10101
CYTARABINE	-100000596	Pain	0.107	0.107143
LAMIVUDINE	-100003877	Abdominal pain	0.11	0.11
ADEFOVIR DIPIVOXIL	-100060871	Abdominal pain	0.11	0.11
EMTRICITABINE	-100060877	Abdominal Pain	0.11	0.11
CYTARABINE	-100000596	Back pain	0.11	0.11
CYTARABINE	-100000596	Lymphoma	0.11	0.11
CYTARABINE	-100000596	Lymphoma NOS	0.11	0.11
CYTARABINE	-100000596	Pain	0.11	0.11
LAMIVUDINE	-100003877	pain	0.11	0.11
ADEFOVIR DIPIVOXIL	-100060871	pain	0.11	0.11
EMTRICITABINE	-100060877	Pain	0.11	0.11
NELARABINE	-100096312	Pain	0.11	0.11
DECITABINE	-100016886	Rash	0.111	0.111111
DECITABINE	-100016886	Stomatitis	0.111	0.111111
THEOPHYLLINE	-100002153	Abdominal Pain	0.12	0.12
CIDOFOVIR	-100060613	Infection	0.12	0.12
CYTARABINE	-100000596	Inflammation	0.12	0.12
CYTARABINE	-100000596	Inflammation NOS	0.12	0.12
CYTARABINE	-100000596	Mucosal Inflammation	0.12	0.12
CYTARABINE	-100000596	Mucosal Inflammation NOS	0.12	0.12
CYTARABINE	-100000596	Pain	0.12	0.12
THEOPHYLLINE	-100002153	Pain	0.12	0.12
LAMIVUDINE	-100003877	pain	0.12	0.12
CAPECITABINE	-100060953	Pain	0.12	0.12
CYTARABINE	-100000596	Pain in Limb	0.12	0.12
LAMIVUDINE	-100003877	rashes	0.12	0.12
EMTRICITABINE	-100060877	Rhinitis	0.12	0.12
CAPECITABINE	-100060953	Decreased lymphocytes	0.13	0.13
EMTRICITABINE	-100060877	Neuritis	0.13	0.13
CYTARABINE	-100000596	Abdominal Pain	0.14	0.14
EMTRICITABINE	-100060877	Abdominal Pain	0.14	0.14
CYTARABINE	-100000596	Abdominal Pain NOS	0.14	0.14
CYTARABINE	-100000596	Infection	0.14	0.14
CYTARABINE	-100000596	Infection NOS	0.14	0.14
CYTARABINE	-100000596	Pain	0.14	0.14
CYTARABINE	-100000596	Pain	0.14	0.140078
EMTRICITABINE	-100060877	Pain	0.14	0.14
CYTARABINE	-100000596	Pain NOS	0.14	0.14
CYTARABINE	-100000596	Pruritus	0.14	0.14
CYTARABINE	-100000596	Pruritus NOS	0.14	0.14
EMTRICITABINE	-100060877	Rash	0.14	0.14
DECITABINE	-100016886	Abdominal pain	0.141	0.141414
DECITABINE	-100016886	pain	0.141	0.141414
DOXORUBICIN	-100001690	Rash	0.142	0.142
DOXORUBICIN	-100001690	Conjunctivitis	0.148	0.148
DOXORUBICIN	-100001690	keratitis	0.148	0.148
CYTARABINE	-100000596	Abdominal Pain	0.15	0.15
CYTARABINE	-100000596	Abdominal Pain NOS	0.15	0.15
DOXORUBICIN	-100001690	Infection	0.15	0.15
CAPECITABINE	-100060953	Lymphopenia	0.15	0.15
CYTARABINE	-100000596	Pain	0.15	0.15
CYTARABINE	-100000596	Pain in Limb	0.15	0.15
CYTARABINE	-100000596	Pain NOS	0.15	0.15
CARBOPLATIN	-100038904	Infections	0.16	0.16
LAMIVUDINE	-100003877	pain	0.16	0.16
EMTRICITABINE	-100060877	Abdominal Pain	0.17	0.17
LAMIVUDINE	-100003877	pain	0.17	0.17
EMTRICITABINE	-100060877	Pain	0.17	0.17
EMTRICITABINE	-100060877	Rash	0.17	0.17
CYTARABINE	-100000596	Back Pain	0.179	0.178571
CYTARABINE	-100000596	Pain	0.179	0.178571
CYTARABINE	-100000596	Back Pain	0.18	0.18
CYTARABINE	-100000596	Infection	0.18	0.18
CYTARABINE	-100000596	Infection NOS	0.18	0.18
CIDOFOVIR	-100060613	Oral Moniliasis	0.18	0.18
CYTARABINE	-100000596	Pain	0.18	0.18
CYTARABINE	-100000596	Pain NOS	0.18	0.18
EMTRICITABINE	-100060877	Rhinitis	0.18	0.18
DECITABINE	-100016886	Back pain	0.182	0.181818
DECITABINE	-100016886	Pain	0.182	0.181818
DECITABINE	-100016886	Pain in extremity	0.182	0.181818
CYTARABINE	-100000596	Arachnoiditis	0.192	0.192308
CYTARABINE	-100000596	Back Pain	0.192	0.192308
CYTARABINE	-100000596	Pain	0.192	0.192308
CAPECITABINE	-100060953	Abdominal Pain	0.2	0.2
CYTARABINE	-100000596	Pain	0.2	0.2
CAPECITABINE	-100060953	Pain	0.2	0.2
THEOPHYLLINE	-100002153	Abdominal Pain	0.21	0.21
CYTARABINE	-100000596	Back Pain	0.21	0.21
LAMIVUDINE	-100003877	infections	0.21	0.21
CYTARABINE	-100000596	Pain	0.21	0.21
THEOPHYLLINE	-100002153	Pain	0.21	0.21
DOXORUBICIN	-100001690	Infection	0.215	0.215
DOXORUBICIN	-100001690	Rash	0.216	0.216
CARBOPLATIN	-100038904	Pain	0.23	0.23
CYTARABINE	-100000596	Back Pain	0.237	0.237354
CYTARABINE	-100000596	Pain	0.237	0.237354
CYTARABINE	-100000596	Back Pain	0.24	0.24
CYTARABINE	-100000596	Pain	0.24	0.24
CAPECITABINE	-100060953	Stomatitis	0.24	0.24
LAMIVUDINE	-100003877	infections	0.25	0.25
CIDOFOVIR	-100060613	Pain	0.25	0.25
CAPECITABINE	-100060953	Stomatitis	0.25	0.25
DOXORUBICIN	-100001690	Infection	0.259	0.259
CAPECITABINE	-100060953	Dermatitis	0.26	0.26
CAPECITABINE	-100060953	Dermatitis	0.27	0.27
CIDOFOVIR	-100060613	Infection	0.28	0.28
CARBOPLATIN	-100038904	Infections	0.28	0.28
CYTARABINE	-100000596	Pain	0.29	0.29
CYTARABINE	-100000596	Pain in Limb	0.29	0.29
CIDOFOVIR	-100060613	Rash	0.3	0.3
EMTRICITABINE	-100060877	Rash	0.3	0.3
FLUOROURACIL	-100003385	Pain	0.306	0.305882
FLUOROURACIL	-100003385	Pain	0.306	0.306
CAPECITABINE	-100060953	Abdominal Pain	0.31	0.31
CAPECITABINE	-100060953	Pain	0.31	0.31
EMTRICITABINE	-100060877	Rash	0.33	0.33
CAPECITABINE	-100060953	Abdominal Pain	0.35	0.35
CAPECITABINE	-100060953	Pain	0.35	0.35
CYTARABINE	-100000596	Arachnoiditis	0.357	0.357143
CYTARABINE	-100000596	Arachnoiditis	0.36	0.36
CAPECITABINE	-100060953	Dermatitis	0.37	0.37
DOXORUBICIN	-100001690	Conjunctivitis	0.384	0.384
DOXORUBICIN	-100001690	keratitis	0.384	0.384
FLUOROURACIL	-100003385	Pain	0.391	0.390805
FLUOROURACIL	-100003385	Pain	0.391	0.391
CYTARABINE	-100000596	Arachnoiditis	0.42	0.42
CYTARABINE	-100000596	Arachnoiditis	0.42	0.420233
FLUOROURACIL	-100003385	Pain	0.436	0.435798
FLUOROURACIL	-100003385	Pain	0.436	0.436
CAPECITABINE	-100060953	Lymphopenia	0.44	0.44
CARBOPLATIN	-100038904	Pain	0.44	0.44
DOXORUBICIN	-100001690	Mucositis	0.529	0.529
DOXORUBICIN	-100001690	Mucositis	0.585	0.585
FLUOROURACIL	-100003385	Pain	0.612	0.611765
FLUOROURACIL	-100003385	Pain	0.612	0.612
CAPECITABINE	-100060953	Stomatitis	0.62	0.62
CAPECITABINE	-100060953	Lymphopenia	0.94	0.94
CYTARABINE	-100000596	abdominal pain	potential	0
EMTRICITABINE	-100060877	abdominal pain	potential	0
CYTARABINE	-100000596	acute non lymphocytic leukemia	potential	0
CYTARABINE	-100000596	allergic edema	potential	0
DOXORUBICIN	-100001690	allergic reaction	potential	0
DOXORUBICIN	-100001690	allergy	potential	0
DOXORUBICIN	-100001690	allergy to penicillin	potential	0
CYTARABINE	-100000596	anal inflammation	potential	0
DOXORUBICIN	-100001690	back pain	potential	0
OXALIPLATIN	-100004609	bone pain	potential	0
OXALIPLATIN	-100004609	catheter infection	potential	0
CYTARABINE	-100000596	cellulitis	potential	0
CYTARABINE	-100000596	chest pain	potential	0
DOXORUBICIN	-100001690	chest pain	potential	0
OXALIPLATIN	-100004609	chest pain	potential	0
CYTARABINE	-100000596	colitis	potential	0
CYTARABINE	-100000596	conjunctivitis	potential	0
DOXORUBICIN	-100001690	conjunctivitis	potential	0
OXALIPLATIN	-100004609	conjunctivitis	potential	0
DOXORUBICIN	-100001690	cryptococcosis	potential	0
DOXORUBICIN	-100001690	deep thrombophlebitis	potential	0
DOXORUBICIN	-100001690	dermatitis	potential	0
CYTARABINE	-100000596	diffuse interstitial pneumonitis	potential	0
OXALIPLATIN	-100004609	eosinophilic pneumonia	potential	0
DOXORUBICIN	-100001690	esophagitis	potential	0
DOXORUBICIN	-100001690	exfoliative dermatitis	potential	0
DOXORUBICIN	-100001690	fungal dermatitis	potential	0
EMTRICITABINE	-100060877	gastroenteritis	potential	0
OXALIPLATIN	-100004609	gingivitis	potential	0
DOXORUBICIN	-100001690	hepatitis	potential	0
DOXORUBICIN	-100001690	infection	potential	0
OXALIPLATIN	-100004609	infection	potential	0
EMTRICITABINE	-100060877	infection	potential	0
CYTARABINE	-100000596	inflammation	potential	0
CYTARABINE	-100000596	interstitial pneumonitis	potential	0
CYTARABINE	-100000596	lymphocytic leukemia	potential	0
DOXORUBICIN	-100001690	maculopapular rash	potential	0
OXALIPLATIN	-100004609	mucositis	potential	0
CYTARABINE	-100000596	necrotizing colitis	potential	0
CYTARABINE	-100000596	neuritis	potential	0
DOXORUBICIN	-100001690	neuritis	potential	0
CYTARABINE	-100000596	non lymphocytic leukemia	potential	0
CYTARABINE	-100000596	oesophagitis	potential	0
DOXORUBICIN	-100001690	optic neuritis	potential	0
DOXORUBICIN	-100001690	oral moniliasis	potential	0
EMTRICITABINE	-100060877	otitis	potential	0
EMTRICITABINE	-100060877	otitis media	potential	0
CYTARABINE	-100000596	pain	potential	0
DOXORUBICIN	-100001690	pain	potential	0
OXALIPLATIN	-100004609	pain	potential	0
EMTRICITABINE	-100060877	pain	potential	0
CYTARABINE	-100000596	pancreatitis	potential	0
CYTARABINE	-100000596	pericarditis	potential	0
CYTARABINE	-100000596	peritonitis	potential	0
DOXORUBICIN	-100001690	pharyngitis	potential	0
CYTARABINE	-100000596	pneumonitis	potential	0
OXALIPLATIN	-100004609	pneumonitis	potential	0
OXALIPLATIN	-100004609	proctitis	potential	0
CYTARABINE	-100000596	pruritis	potential	0
DOXORUBICIN	-100001690	pruritus	potential	0
OXALIPLATIN	-100004609	pruritus	potential	0
CYTARABINE	-100000596	rash	potential	0
DOXORUBICIN	-100001690	rash	potential	0
OXALIPLATIN	-100004609	rash	potential	0
EMTRICITABINE	-100060877	rash	potential	0
DOXORUBICIN	-100001690	rhinitis	potential	0
EMTRICITABINE	-100060877	rhinitis	potential	0
DOXORUBICIN	-100001690	sinusitis	potential	0
OXALIPLATIN	-100004609	stomatitis	potential	0
CYTARABINE	-100000596	thrombophlebitis	potential	0
DOXORUBICIN	-100001690	thrombophlebitis	potential	0
LAMIVUDINE	-100003877	Pancreatitis	rare	0
